# Supplementary material
Source: PubMed Central journal article supplement (PMC2984238)
Supplement: supp_M110.001719_mcp.M110.001719-2.pdf [file supp_M110.001719_mcp.M110.001719-2.pdf]

**Supplementary Table 2. Human epididymal proteins identified by MALDI-TOF MS and MALDI-TOF/TOF MS**

**Part I: Proteins identified by Voyager DE - STR biospectrometry workstation (not include keratins)**

**Part II: Proteins identified by 4800 MALDI TOF/TOF Analyzer (not include single-peptide identified proteins and keratins)**

**Part III: The observed precursor mass , charge and the labeled MS/MS spectrum of the 32 single-peptide identified proteins.**

**Part IV: Presentation of PMF spectrum**

**Criteria for acceptance:**

**For PMF:**

All identified proteins had a significance threshold of at least  $p \leq 0.05$ , Score  $\geq 60$  and at least four masses matched.

If more than one protein was identified in a spot, the single protein member with the highest score (top rank) was chosen from the multi-protein family.

**For MS/MS:**

Individual ions scores  $\geq 37$  (Significance level,  $p \leq 0.05$ )

Part I: Proteins identified by Voyager DE - STR biospectrometry workstation

| No. | Entry name  | Score | Coverage % | Mr     | pI   | Searched | Matched | Protein description                           |
|-----|-------------|-------|------------|--------|------|----------|---------|-----------------------------------------------|
| 1   | EF2_HUMAN   | 94    | 15         | 95146  | 6.42 | 9        | 8       | Elongation factor 2                           |
| 2   | IREB1_HUMAN | 141   | 17         | 98337  | 6.23 | 11       | 11      | Iron-responsive element-binding protein 1     |
| 3   | VINC_HUMAN  | 105   | 14         | 123591 | 5.51 | 14       | 12      | Vinculin                                      |
| 4   | GANAB_HUMAN | 89    | 13         | 106807 | 5.74 | 15       | 10      | Neutral alpha-glucosidase AB precursor        |
| 5   | CBX5_HUMAN  | 61    | 32         | 22211  | 5.71 | 15       | 5       | Chromobox protein homolog 5                   |
| 6   | HS90A_HUMAN | 81    | 13         | 84607  | 4.94 | 12       | 9       | Heat shock protein HSP 90-alpha               |
| 7   | TGM2_HUMAN  | 77    | 15         | 77280  | 5.11 | 11       | 8       | Protein-glutamine gamma-glutamyltransferase 2 |
| 8   | TRFE_HUMAN  | 123   | 23         | 77000  | 6.81 | 16       | 13      | Serotransferrin precursor                     |
| 9   | CO3_HUMAN   | 134   | 12         | 187030 | 6.02 | 17       | 15      | Complement C3 precursor                       |
| 10  | WDR1_HUMAN  | 120   | 37         | 66152  | 6.17 | 24       | 12      | WD repeat protein 1                           |
| 11  | PUR9_HUMAN  | 118   | 27         | 64575  | 6.27 | 15       | 11      | Bifunctional purine biosynthesis protein PURH |
| 12  | KPYM_HUMAN  | 146   | 26         | 57900  | 7.96 | 13       | 12      | Pyruvate kinase isozymes M1/M2                |
| 13  | APOA1_HUMAN | 86    | 19         | 30759  | 5.56 | 9        | 6       | Apolipoprotein A-I precursor                  |
| 14  | HBB_HUMAN   | 109   | 62         | 15988  | 6.75 | 9        | 7       | Hemoglobin subunit beta                       |
| 15  | UBIQ_HUMAN, | 98    | 61         | 8560   | 6.56 | 7        | 5       | Ubiquitin                                     |
| 16  | UCP3_HUMAN  | 185   | 20         | 34193  | 9.31 | 16       | 5       | Mitochondrial uncoupling protein 3            |
| 17  | MOES_HUMAN  | 67    | 14         | 67778  | 6.08 | 11       | 7       | Moesin                                        |

| No. | Entry name  | Score | Coverage % | Mr    | pI   | Searched | Matched | Protein description                             |
|-----|-------------|-------|------------|-------|------|----------|---------|-------------------------------------------------|
| 18  | IGHG1_HUMAN | 97    | 29         | 36083 | 8.46 | 7        | 6       | Ig gamma-1 chain C region                       |
| 19  | ILEU_HUMAN, | 63    | 17         | 42715 | 5.9  | 12       | 6       | Leukocyte elastase inhibitor                    |
| 20  | ACY1_HUMAN  | 146   | 41         | 45856 | 5.77 | 20       | 13      | Aminoacylase-1                                  |
| 21  | SBP1_HUMAN  | 103   | 26         | 52280 | 6.13 | 19       | 10      | Selenium-binding protein 1                      |
| 22  | CNDP2_HUMAN | 126   | 29         | 52845 | 5.66 | 18       | 11      | Cytosolic nonspecific dipeptidase               |
| 23  | ALBU_HUMAN  | 118   | 23         | 69321 | 5.92 | 18       | 13      | Serum albumin                                   |
| 24  | 1433Z_HUMAN | 97    | 31         | 27728 | 4.73 | 15       | 9       | 14-3-3 protein zeta/delta                       |
| 25  | TAGL_HUMAN  | 130   | 45         | 22596 | 8.87 | 16       | 12      | Transgelin                                      |
| 26  | ANXA5_HUMAN | 76    | 18         | 35914 | 4.94 | 6        | 5       | Annexin A5                                      |
| 27  | ACTB_HUMAN  | 127   | 20         | 41710 | 5.29 | 13       | 6       | Actin, cytoplasmic 1                            |
| 28  | ACTG_HUMAN  | 95    | 29         | 41766 | 5.31 | 12       | 8       | Actin, cytoplasmic 2                            |
| 29  | KCRB_HUMAN  | 107   | 26         | 42617 | 5.34 | 11       | 8       | Creatine kinase B-type                          |
| 30  | DDAH1_HUMAN | 79    | 29         | 31102 | 5.53 | 10       | 6       | NG,NG-dimethylarginine dimethylaminohydrolase 1 |
| 31  | IPYR_HUMAN, | 124   | 41         | 32639 | 5.54 | 13       | 9       | Inorganic pyrophosphatase                       |
| 32  | BHMT1_HUMAN | 70    | 19         | 44942 | 6.41 | 10       | 6       | Betaine--homocysteine S-methyltransferase 1     |
| 33  | AL1A1_HUMAN | 62    | 13         | 54827 | 6.3  | 7        | 5       | Retinal dehydrogenase 1                         |
| 34  | GP73_HUMAN  | 61    | 13         | 45306 | 4.91 | 8        | 5       | Golgi phosphoprotein 2                          |
| 35  | ADHX_HUMAN  | 74    | 20         | 39698 | 7.45 | 6        | 5       | Alcohol dehydrogenase class 3 chi chain         |
| 36  | IDHC_HUMAN  | 79    | 17         | 46630 | 6.53 | 11       | 7       | Isocitrate dehydrogenase                        |

| No. | Entry name  | Score | Coverage % | Mr    | pI   | Searched | Matched | Protein description                          |
|-----|-------------|-------|------------|-------|------|----------|---------|----------------------------------------------|
| 37  | ALDOA_HUMAN | 104   | 34         | 39395 | 8.3  | 9        | 7       | Fructose-bisphosphate aldolase A             |
| 38  | G3P_HUMAN   | 73    | 25         | 36030 | 8.57 | 7        | 5       | Glyceraldehyde-3-phosphate dehydrogenase     |
| 39  | MDHC_HUMAN  | 77    | 20         | 36403 | 6.91 | 8        | 6       | Malate dehydrogenase                         |
| 40  | PNPH_HUMAN  | 84    | 28         | 32097 | 6.45 | 9        | 7       | Purine nucleoside phosphorylase              |
| 41  | TPIS_HUMAN  | 105   | 34         | 26653 | 6.45 | 9        | 7       | Triosephosphate isomerase                    |
| 42  | PEBP1_HUMAN | 71    | 36         | 21044 | 7.01 | 9        | 5       | Phosphatidylethanolamine-binding protein 1   |
| 43  | ALDR_HUMAN  | 82    | 22         | 35830 | 6.51 | 9        | 6       | Aldose reductase                             |
| 44  | PPIA_HUMAN  | 99    | 36         | 18001 | 7.68 | 11       | 9       | Peptidyl-prolyl cis-trans isomerase A        |
| 45  | HINT1_HUMAN | 61    | 30         | 13793 | 6.43 | 9        | 4       | Histidine triad nucleotide-binding protein 1 |
| 46  | LDHB_HUMAN  | 72    | 20         | 36615 | 5.71 | 11       | 6       | L-lactate dehydrogenase B chain              |
| 47  | TTHY_HUMAN  | 112   | 53         | 15877 | 5.52 | 8        | 6       | Transthyretin precursor                      |
| 48  | 6PGL_HUMAN  | 74    | 30         | 27530 | 5.7  | 13       | 6       | 6-phosphogluconolactonase                    |
| 49  | GRP78_HUMAN | 123   | 0          | 72288 | 5.07 | 15       | 11      | 78 kDa glucose-regulated protein             |
| 50  | IPYR_HUMAN  | 124   | 41         | 32639 | 5.54 | 13       | 9       | Inorganic pyrophosphatase                    |
| 51  | TTHY_HUMAN  | 104   | 48         | 15877 | 5.52 | 5        | 5       | Transthyretin precursor                      |
| 52  | GALK1_HUMAN | 127   | 26         | 42246 | 6.04 | 11       | 9       | Galactokinase                                |
| 53  | NADC_HUMAN, | 61    | 21         | 30796 | 5.81 | 11       | 5       | Nicotinate-nucleotide pyrophosphorylase      |
| 54  | CRYL1_HUMAN | 114   | 30         | 35396 | 5.81 | 10       | 8       | Lambda-crystallin homolog                    |
| 55  | PSME1_HUMAN | 144   | 48         | 28705 | 5.78 | 20       | 12      | Proteasome activator complex subunit 1       |

| No. | Entry name  | Score | Coverage % | Mr     | pI   | Searched | Matched | Protein description                        |
|-----|-------------|-------|------------|--------|------|----------|---------|--------------------------------------------|
| 56  | GALM_HUMAN  | 144   | 40         | 37742  | 6.18 | 13       | 10      | Aldose 1-epimerase                         |
| 57  | AK1A1_HUMAN | 138   | 37         | 36550  | 6.32 | 8        | 8       | Alcohol dehydrogenase                      |
| 58  | ARK72_HUMAN | 61    | 17         | 39564  | 6.7  | 9        | 5       | Aflatoxin B1 aldehyde reductase member 2   |
| 59  | MDHC_HUMAN  | 69    | 23         | 36403  | 6.91 | 12       | 7       | Malate dehydrogenase,                      |
| 60  | PGAM1_HUMAN | 102   | 37         | 28786  | 6.67 | 11       | 8       | Phosphoglycerate mutase 1                  |
| 61  | CAH1_HUMAN  | 63    | 31         | 28852  | 6.59 | 13       | 6       | Carbonic anhydrase 1                       |
| 62  | TPIS_HUMAN  | 149   | 48         | 26653  | 6.45 | 8        | 8       | Triosephosphate isomerase                  |
| 63  | PPIA_HUMAN  | 71    | 32         | 18001  | 7.68 | 11       | 6       | Peptidyl-prolyl cis-trans isomerase A      |
| 64  | PRDX1_HUMAN | 98    | 37         | 22096  | 8.27 | 8        | 6       | Peroxiredoxin-1                            |
| 65  | BLVRB_HUMAN | 85    | 49         | 22105  | 7.13 | 14       | 7       | Flavin reductase                           |
| 66  | KAD1_HUMAN  | 102   | 43         | 21621  | 8.73 | 11       | 8       | Adenylate kinase isoenzyme 1               |
| 67  | SPTB2_HUMAN | 61    | 4          | 274439 | 5.39 | 7        | 7       | Spectrin beta chain, brain 1               |
| 68  | PEBP1_HUMAN | 66    | 32         | 21044  | 7.01 | 6        | 4       | Phosphatidylethanolamine-binding protein 1 |
| 69  | COF1_HUMAN  | 105   | 42         | 18491  | 8.22 | 8        | 6       | Cofilin-1                                  |
| 70  | UBIQ_HUMAN  | 98    | 61         | 8560   | 6.56 | 7        | 5       | Ubiquitin                                  |
| 71  | ENPL_HUMAN  | 117   | 14         | 92411  | 4.76 | 11       | 11      | Endoplasmic precursor                      |
| 72  | HS90A_HUMAN | 81    | 13         | 83212  | 4.97 | 12       | 8       | Heat shock protein HSP 90-beta             |
| 73  | A1BG_HUMAN  | 67    | 16         | 54239  | 5.58 | 11       | 7       | Alpha-1B-glycoprotein precursor            |
| 74  | PLSL_HUMAN  | 133   | 24         | 70245  | 5.2  | 16       | 12      | Plastin-2                                  |

| No. | Entry name  | Score | Coverage % | Mr    | pI   | Searched | Matched | Protein description                           |
|-----|-------------|-------|------------|-------|------|----------|---------|-----------------------------------------------|
| 75  | ACON_HUMAN  | 157   | 20         | 85372 | 7.36 | 12       | 12      | Aconitate hydratase                           |
| 76  | ENOA_HUMAN  | 73    | 19         | 47139 | 7.01 | 9        | 8       | Alpha-enolase                                 |
| 77  | IDHC_HUMAN  | 149   | 31         | 46630 | 6.53 | 14       | 12      | Isocitrate dehydrogenase                      |
| 78  | TIGD2_HUMAN | 62    | 16         | 59586 | 9.12 | 10       | 6       | Tigger transposable element-derived protein 2 |
| 79  | PGAM1_HUMAN | 171   | 54         | 28786 | 6.67 | 12       | 11      | Phosphoglycerate mutase 1                     |
| 80  | MAWBP_HUMAN | 65    | 22         | 31765 | 6.06 | 10       | 6       | Probable isomerase MAWBP                      |
| 81  | XTP3B_HUMAN | 67    | 16         | 54823 | 5.88 | 10       | 6       | XTP3-transactivated gene B protein precursor  |
| 82  | CAH3_HUMAN  | 110   | 38         | 29553 | 6.86 | 9        | 7       | Carbonic anhydrase 3                          |
| 83  | TPIS_HUMAN  | 160   | 46         | 26653 | 6.45 | 12       | 9       | Triosephosphate isomerase                     |
| 84  | ACTS_HUMAN  | 68    | 25         | 42024 | 5.23 | 11       | 6       | Actin, alpha skeletal muscle                  |
| 84  | PRDX6_HUMAN | 111   | 36         | 25019 | 6    | 9        | 7       | Peroxiredoxin-6                               |
| 85  | NT5C_HUMAN  | 98    | 432        | 23368 | 6.18 | 13       | 7       | 5'-deoxyribonucleotidase, cytosolic type      |
| 86  | SAMP_HUMAN  | 72    | 20         | 25371 | 6.1  | 4        | 4       | Serum amyloid P-component precursor           |
| 87  | KHL15_HUMAN | 61    | 7          | 69730 | 5.98 | 6        | 5       | Kelch-like protein 15                         |
| 88  | GDIR_HUMAN  | 85    | 25         | 23193 | 5.02 | 6        | 5       | Rho GDP-dissociation inhibitor 1              |
| 89  | PRDX2_HUMAN | 62    | 26         | 21878 | 5.66 | 7        | 4       | Peroxiredoxin-2                               |
| 90  | CART1_HUMAN | 68    | 20         | 36938 | 8.8  | 10       | 6       | Cartilage homeoprotein 1                      |
| 91  | 6PGL_HUMAN  | 74    | 30         | 27530 | 5.7  | 13       | 6       | 6-phosphogluconolactonase                     |
| 92  | HSPB1_HUMAN | 114   | 37         | 22768 | 5.98 | 9        | 7       | Heat-shock protein beta-1                     |

| No. | Entry name  | Score | Coverage % | Mr     | pI   | Searched | Matched | Protein description                              |
|-----|-------------|-------|------------|--------|------|----------|---------|--------------------------------------------------|
| 93  | M4K4_HUMAN  | 62    | 5          | 142013 | 7.09 | 7        | 6       | Mitogen-activated protein kinase kinase kinase 4 |
| 94  | PHP14_HUMAN | 61    | 47         | 13824  | 5.65 | 10       | 5       | 14 kDa phosphohistidine phosphatase              |
| 95  | TBA3_HUMAN  | 102   | 30         | 50104  | 4.94 | 12       | 8       | Tubulin alpha-3 chain                            |
| 96  | TBAK_HUMAN  | 102   | 30         | 50120  | 4.94 | 12       | 8       | Tubulin alpha-ubiquitous chain                   |
| 97  | S10AB_HUMAN | 60    | 42         | 11733  | 6.56 | 9        | 5       | Protein S100-A11                                 |
| 98  | A1AT_HUMAN  | 124   | 28         | 46707  | 5.37 | 15       | 10      | Alpha-1-antitrypsin                              |
| 99  | VIME_HUMAN  | 120   | 20         | 53619  | 5.06 | 14       | 11      | Vimentin                                         |
| 101 | ANXA5_HUMAN | 99    | 30         | 35914  | 4.94 | 10       | 7       | Annexin A5                                       |
| 102 | 1433E_HUMAN | 68    | 19         | 29155  | 4.63 | 8        | 6       | 14-3-3 protein epsilon                           |
| 103 | TBA6_HUMAN  | 96    | 29         | 49863  | 4.96 | 14       | 8       | Tubulin alpha-6 chain                            |
| 104 | TBAK_HUMAN  | 136   | 34         | 50120  | 4.94 | 16       | 11      | Tubulin alpha-ubiquitous chain                   |
| 105 | GRP78_HUMAN | 191   | 27         | 72288  | 5.07 | 19       | 16      | 78 kDa glucose-regulated protein precursor       |
| 106 | A1AG1_HUMAN | 78    | 22         | 23497  | 4.93 | 9        | 5       | Alpha-1-acid glycoprotein 1 precursor            |
| 107 | TRFE_HUMAN  | 190   | 26         | 77000  | 6.81 | 10       | 18      | Serotransferrin precursor                        |
| 108 | TKT_HUMAN   | 65    | 10         | 67835  | 7.58 | 4        | 4       | Transketolase                                    |
| 109 | KPYM_HUMAN  | 149   | 30         | 57900  | 7.96 | 18       | 14      | Pyruvate kinase isozymes M1/M2                   |
| 110 | PRDX1_HUMAN | 70    | 35         | 22096  | 8.27 | 10       | 5       | Peroxiredoxin-1                                  |
| 111 | BLVRB_HUMAN | 78    | 37         | 22105  | 7.13 | 9        | 6       | Flavin reductase                                 |
| 112 | PPIB_HUMAN  | 125   | 42         | 22728  | 9.33 | 9        | 9       | Peptidyl-prolyl cis-trans isomerase B precursor  |

| No. | Entry name  | Score | Coverage % | Mr     | pI    | Searched | Matched | Protein description                           |
|-----|-------------|-------|------------|--------|-------|----------|---------|-----------------------------------------------|
| 113 | PARK7_HUMAN | 61    | 29         | 19878  | 6.33  | 8        | 5       | Protein DJ-1                                  |
| 114 | PYR_HUMAN   | 103   | 20         | 32639  | 5.54  | 8        | 5       | Inorganic pyrophosphatase                     |
| 115 | IGHG1_HUMAN | 62    | 20         | 36083  | 8.46  | 10       | 5       | Ig gamma-1 chain C region                     |
| 116 | FBN1_HUMAN  | 61    | 4          | 312098 | 4.81  | 11       | 10      | Fibrillin-1                                   |
| 117 | BTBD6_HUMAN | 61    | 16         | 45896  | 5.45  | 8        | 5       | BTB/POZ domain-containing protein 6           |
| 118 | AGR2_HUMAN  | 74    | 42         | 19967  | 9.03  | 10       | 5       | Anterior gradient protein 2                   |
| 119 | PDXK_HUMAN  | 84    | 24         | 35080  | 5.75  | 9        | 6       | Pyridoxal kinase                              |
| 120 | FGD2_HUMAN  | 61    | 14         | 74845  | 6.51  | 6        | 5       | RhoGEF and PH domain-containing protein 2     |
| 121 | CNDP2_HUMAN | 65    | 10         | 52845  | 5.66  | 4        | 4       | Cytosolic nonspecific dipeptidase             |
| 122 | PLXA4_HUMAN | 66    | 6          | 212318 | 6.42  | 7        | 7       | Plexin-A4 precursor                           |
| 123 | PRKDC_HUMAN | 64    | 4          | 468788 | 6.75  | 16       | 14      | NA-dependent protein kinase catalytic subunit |
| 124 | CF152_HUMAN | 64    | 9          | 80505  | 7.31  | 5        | 5       | Uncharacterized protein C6orf152              |
| 125 | 3BP2_HUMAN  | 63    | 11         | 62204  | 7.67  | 7        | 5       | SH3 domain-binding protein 2                  |
| 126 | IQEC1_HUMAN | 70    | 8          | 108247 | 6.49  | 9        | 6       | IQ motif and Sec7 domain-containing protein 1 |
| 127 | CSHL_HUMAN  | 68    | 19         | 22634  | 5.57  | 5        | 4       | Chorionic somatomammotropin hormone-like 1    |
| 128 | TEKT4_HUMAN | 74    | 10         | 50617  | 6.01  | 4        | 4       | Tektin-4                                      |
| 129 | KLF5_HUMAN  | 71    | 11         | 50759  | 8.86  | 5        | 4       | Krueppel-like factor 5                        |
| 130 | CC74A_HUMAN | 65    | 15         | 41580  | 10.52 | 5        | 5       | Coiled-coil domain-containing protein 74A     |
| 131 | THUM2_HUMAN | 61    | 12         | 53333  | 8.2   | 4        | 4       | THUMP domain-containing protein 2             |



| No. | Entry name   | Score | Coverage % | Mr    | pI    | Searched | Matched | Protein description                                                                 |
|-----|--------------|-------|------------|-------|-------|----------|---------|-------------------------------------------------------------------------------------|
| 132 | VDAC1_HUMAN  | 82    | 25         | 30754 | 8.62  | 6        | 4       | Voltage-dependent anion-selective channel protein 1                                 |
| 133 | KBTB3_HUMAN  | 61    | 8          | 69350 | 5.22  | 6        | 5       | Kelch repeat and BTB domain-containing protein 3                                    |
| 134 | ZN484_HUMAN  | 69    | 8          | 98158 | 8.68  | 6        | 6       | Zinc finger protein 484                                                             |
| 135 | WISP1_HUMAN  | 62    | 15         | 40304 | 6.84  | 5        | 4       | WNT1-inducible-signaling pathway protein 1                                          |
| 136 | ROA2_HUMAN   | 60    | 12         | 37407 | 8.97  | 5        | 4       | Heterogeneous nuclear ribonucleoproteins A2/B1                                      |
| 137 | GRP75_HUMAN  | 76    | 14         | 73635 | 5.87  | 10       | 7       | Stress-70 protein                                                                   |
| 138 | PANK3_HUMAN  | 63    | 15         | 41068 | 6.13  | 6        | 4       | Pantothenate kinase 3                                                               |
| 139 | LDH6A_HUMAN  | 65    | 12         | 36484 | 6.51  | 5        | 4       | L-lactate dehydrogenase A-like 6A                                                   |
| 140 | SOLH2_HUMAN  | 62    | 12         | 46911 | 6.79  | 4        | 3       | Spermatogenesis- and oogenesis-specific basic helix-loop-helix-containing protein 2 |
| 141 | B1AN51_HUMAN | 75    | 18         | 54014 | 8.6   | 6        | 5       | spermatogenesis associated 6                                                        |
| 142 | RL13A_HUMAN  | 66    | 31         | 18509 | 10.51 | 5        | 4       | 60S ribosomal protein L13a                                                          |
| 143 | SALL1_HUMAN  | 65    | 27         | 15646 | 8.15  | 4        | 4       | SALL1 protein                                                                       |
| 144 | KAD4_HUMAN   | 65    | 27         | 22073 | 5.38  | 7        | 5       | Adenylate kinase isoenzyme 4                                                        |
| 145 | WFDC2_HUMAN  | 84    | 36         | 14337 | 6.79  | 6        | 5       | WAP four-disulfide core domain protein 2 precursor                                  |
| 146 | CPNS1_HUMAN  | 61    | 12         | 57948 | 6.41  | 5        | 4       | Calpain small subunit 1                                                             |
| 147 | C1GLT_HUMAN  | 65    | 17         | 42176 | 6.17  | 7        | 5       | Glycoprotein-N-acetylgalactosamine 3-beta-galactosyltransferase 1                   |
| 148 | RG9D2_HUMAN  | 66    | 20         | 39694 | 7.29  | 7        | 6       | RNA methyltransferase domain containing 2                                           |

| No. | Entry name  | Score | Coverage % | Mr    | pI   | Searched | Matched | Protein description                                             |
|-----|-------------|-------|------------|-------|------|----------|---------|-----------------------------------------------------------------|
| 149 | SPA4L_HUMAN | 67    | 14         | 43053 | 8.61 | 5        | 4       | Sperm-associated antigen 4-like protein                         |
| 150 | ENOG_HUMAN  | 62    | 17         | 47239 | 4.91 | 9        | 5       | Gamma-enolase                                                   |
| 151 | GDIR1_HUMAN | 85    | 25         | 23193 | 5.02 | 6        | 5       | Rho GDP-dissociation inhibitor 1                                |
| 152 | FABPH_HUMAN |       | 35         | 14849 | 6.29 | 7        | 5       | Fatty acid-binding protein                                      |
| 153 | PAPS2_HUMAN | 63    | 12         | 69457 | 8.18 | 6        | 5       | Bifunctional 3'-phosphoadenosine 5'-phosphosulfate synthetase 2 |
| 154 | HINT1_HUMAN | 64    | 52         | 13793 | 6.43 | 10       | 5       | Histidine triad nucleotide-binding protein 1                    |
| 155 | UBE2N_HUMAN | 72    | 26         | 17127 | 6.13 | 10       | 5       | Ubiquitin-conjugating enzyme E2 N                               |
| 156 | TBCA_HUMAN  | 62    | 25         | 12847 | 5.25 | 7        | 6       | Tubulin-specific chaperone A                                    |
| 157 | MLRN_HUMAN  | 73    | 29         | 19814 | 4.8  | 5        | 5       | Myosin regulatory light chain 2                                 |
| 158 | CYB5_HUMAN  | 68    | 42         | 15321 | 4.88 | 7        | 4       | Cytochrome b5                                                   |
| 159 | NDKA_HUMAN  | 95    | 42         | 17138 | 5.83 | 7        | 7       | Nucleoside diphosphate kinase A                                 |
| 160 | NPC2_HUMAN  | 66    | 37         | 16559 | 7.56 | 7        | 4       | Epididymal secretory protein E1 precursor                       |
| 161 | COF1_HUMAN  | 88    | 48         | 18491 | 8.22 | 9        | 5       | Cofilin-1                                                       |
| 162 | PEBP1_HUMAN | 106   | 56         | 21044 | 7.01 | 8        | 6       | Phosphatidylethanolamine-binding protein 1                      |
| 163 | CRYAB_HUMAN | 65    | 33         | 20146 | 6.76 | 10       | 4       | Alpha crystallin B chain                                        |
| 164 | SODM_HUMAN  | 62    | 20         | 24707 | 8.35 | 7        | 4       | Superoxide dismutase [Mn], mitochondrial precursor              |
| 165 | APT_HUMAN   | 62    | 30         | 19595 | 5.78 | 7        | 4       | Adenine phosphoribosyltransferase                               |
| 166 | CAYP1_HUMAN | 97    | 30         | 20954 | 4.74 | 8        | 7       | Calcyphosin                                                     |

| No. | Entry name  | Score | Coverage % | Mr    | pI   | Searched | Matched | Protein description                            |
|-----|-------------|-------|------------|-------|------|----------|---------|------------------------------------------------|
| 167 | ARFRP_HUMAN | 61    | 20         | 22599 | 7.49 | 5        | 4       | ARF-related protein 1                          |
| 168 | RANB3_HUMAN | 62    | 17         | 60173 | 4.7  | 9        | 6       | Ran-binding protein 3                          |
| 169 | PHP14_HUMAN | 77    | 47         | 13824 | 5.56 | 8        | 6       | 14 kDa phosphohistidine phosphatase            |
| 170 | WNT5A_HUMAN | 60    | 18         | 40860 | 8.72 | 5        | 5       | Protein Wnt-5a                                 |
| 171 | PRDX5_HUMAN | 116   | 41         | 22012 | 8.85 | 8        | 7       | Peroxiredoxin-5, mitochondrial precursor       |
| 172 | MYL6_HUMAN  | 71    | 33         | 16919 | 4.56 | 7        | 5       | Myosin light polypeptide 6                     |
| 173 | MLRN_HUMAN  | 69    | 29         | 19814 | 4.8  | 5        | 5       | Myosin regulatory light chain 2                |
| 174 | SODC_HUMAN  | 68    | 38         | 15926 | 5.7  | 7        | 4       | Superoxide dismutase [Cu-Zn]                   |
| 175 | PRDX3_HUMAN | 71    | 38         | 27675 | 7.67 | 7        | 5       | Thioredoxin-dependent peroxide reductase       |
| 176 | AB14B_HUMAN | 65    | 28         | 22332 | 5.94 | 7        | 5       | Abhydrolase domain-containing protein 14B      |
| 177 | TAGL_HUMAN  | 131   | 41         | 22465 | 8.88 | 11       | 39      | Transgelin                                     |
| 178 | CNN1_HUMAN  | 69    | 16         | 33150 | 9.16 | 8        | 6       | Calponin-1                                     |
| 179 | HBA_HUMAN   | 66    | 34         | 15117 | 8.73 | 6        | 4       | Hemoglobin subunit alpha                       |
| 180 | EP3B_HUMAN  | 62    | 36         | 17573 | 6.51 | 6        | 4       | Epididymal secretory protein E3 beta precursor |
| 181 | COF1_HUMAN  | 60    | 32         | 18360 | 8.26 | 6        | 4       | Cofilin-1                                      |
| 182 | PPIA_HUMAN  | 119   | 50         | 17870 | 7.82 | 13       | 10      | Peptidyl-prolyl cis-trans isomerase A          |
| 183 | NDKB_HUMAN  | 76    | 41         | 17287 | 8.52 | 8        | 5       | Nucleoside diphosphate kinase B                |
| 184 | WDR1_HUMAN  | 93    | 21         | 66152 | 6.17 | 12       | 8       | WD repeat protein 1                            |
| 185 | IGHG1_HUMAN | 123   | 34         | 36083 | 8.46 | 7        | 7       | Ig gamma-1 chain C region                      |

| No. | Entry name  | Score | Coverage % | Mr    | pI   | Searched | Matched | Protein description                 |
|-----|-------------|-------|------------|-------|------|----------|---------|-------------------------------------|
| 186 | GDIB_HUMAN  | 120   | 26         | 50631 | 6.11 | 10       | 9       | Rab GDP dissociation inhibitor beta |
| 187 | SBP1_HUMAN  | 64    | 15         | 52280 | 6.13 | 11       | 6       | Selenium-binding protein 1          |
| 188 | ARP3_HUMAN  | 148   | 31         | 47341 | 5.61 | 11       | 10      | Actin-like protein 3                |
| 189 | GSHB_HUMAN  | 114   | 25         | 52352 | 5.67 | 12       | 9       | Glutathione synthetase              |
| 189 | GSHB_HUMAN  | 114   | 25         | 52352 | 5.67 | 12       | 9       | Glutathione synthetase              |
| 190 | PLSL_HUMAN  | 114   | 27         | 70245 | 5.2  | 13       | 10      | Plastin-2                           |
| 191 | VTDB_HUMAN  | 75    | 23         | 52929 | 5.4  | 11       | 7       | Vitamin D-binding protein precursor |
| 192 | TBA3_HUMAN  | 71    | 17         | 50104 | 4.94 | 6        | 5       | Tubulin alpha-3 chain               |
| 193 | A1AT_HUMAN  | 62    | 15         | 46707 | 5.37 | 8        | 5       | Alpha-1-antitrypsin precursor       |
| 194 | TBB5_HUMAN  | 62    | 10         | 49639 | 4.78 | 8        | 5       | Tubulin beta chain                  |
| 195 | A1AT_HUMAN  | 64    | 19         | 46707 | 5.37 | 13       | 6       | Alpha-1-antitrypsin precursor       |
| 196 | TBB2C_HUMAN | 60    | 15         | 49799 | 4.79 | 13       | 6       | Tubulin beta-2C chain               |
| 197 | TBB4_HUMAN  | 60    | 13         | 49554 | 4.78 | 17       | 6       | Tubulin beta-4 chain                |
| 198 | TPM2_HUMAN  | 71    | 19         | 32831 | 4.66 | 15       | 7       | Tropomyosin beta chain              |
| 200 | BLK_HUMAN   | 61    | 10         | 57702 | 7.98 | 6        | 5       | Tyrosine-protein kinase BLK         |
| 201 | TPM4_HUMAN  | 62    | 8          | 28504 | 4.67 | 4        | 4       | Tropomyosin alpha-4 chain           |
| 202 | ACTH_HUMAN  | 65    | 17         | 41850 | 5.31 | 10       | 5       | Actin, gamma-enteric smooth muscle  |
| 203 | ACTC_HUMAN  | 60    | 16         | 41992 | 5.23 | 10       | 5       | Actin, alpha cardiac muscle 1       |
| 204 | ACTS_HUMAN  | 61    | 16         | 42024 | 5.23 | 10       | 5       | Actin, alpha skeletal muscle        |

| No. | Entry name  | Score | Coverage % | Mr     | pI   | Searched | Matched | Protein description                                 |
|-----|-------------|-------|------------|--------|------|----------|---------|-----------------------------------------------------|
| 205 | ACTA_HUMAN  | 60    | 16         | 41982  | 5.23 | 10       | 5       | Actin, aortic smooth muscle                         |
| 206 | KCRB_HUMAN  | 65    | 19         | 42617  | 5.34 | 13       | 6       | Creatine kinase B-type                              |
| 207 | LDHB_HUMAN  | 121   | 33         | 36615  | 5.71 | 10       | 8       | L-lactate dehydrogenase B chain                     |
| 208 | DDAH1_HUMAN | 60    | 20         | 31102  | 5.53 | 6        | 4       | NG,NG-dimethylarginine dimethylaminohydrolase 1     |
| 209 | BPNT1_HUMAN | 60    | 22         | 33371  | 5.46 | 6        | 4       | 3',5'-bisphosphate nucleotidase 1                   |
| 210 | ANXA5_HUMAN | 104   | 30         | 35914  | 4.94 | 9        | 7       | Annexin A5                                          |
| 211 | 1433E_HUMAN | 81    | 27         | 29155  | 4.63 | 9        | 6       | 14-3-3 protein epsilon                              |
| 212 | 1433Z_HUMAN | 61    | 24         | 27728  | 4.73 | 7        | 4       | 14-3-3 protein zeta/delta                           |
| 213 | 1433B_HUMAN | 61    | 21         | 28065  | 4.76 | 7        | 5       | 14-3-3 protein beta/alpha                           |
| 214 | NU160_HUMAN | 63    | 6          | 148905 | 5.41 | 7        | 6       | Nuclear pore complex protein Nup160                 |
| 215 | GDIR_HUMAN  | 105   | 34         | 23193  | 5.02 | 7        | 6       | Rho GDP-dissociation inhibitor 1                    |
| 216 | KHL15_HUMAN | 60    | 7          | 69730  | 5.98 | 7        | 5       | Kelch-like protein 15                               |
| 217 | HSPB1_HUMAN | 116   | 47         | 22768  | 5.98 | 6        | 6       | Heat-shock protein beta-1                           |
| 218 | GSTP1_HUMAN | 64    | 26         | 23341  | 5.43 | 4        | 4       | Glutathione S-transferase P                         |
| 219 | GSTO1_HUMAN | 60    | 22         | 27548  | 6.23 | 11       | 5       | Glutathione transferase omega-1                     |
| 220 | PNPH_HUMAN  | 129   | 35         | 32097  | 6.45 | 9        | 8       | Purine nucleoside phosphorylase                     |
| 221 | PIPNA_HUMAN | 65    | 20         | 31786  | 6.11 | 7        | 5       | Phosphatidylinositol transfer protein alpha isoform |
| 222 | GALM_HUMAN  | 109   | 36         | 37742  | 6.18 | 12       | 8       | Aldose 1-epimerase                                  |
| 223 | FBX25_HUMAN | 60    | 16         | 43285  | 8.35 | 12       | 5       | F-box only protein 25                               |

| No. | Entry name  | Score | Coverage % | Mr    | pI   | Searched | Matched | Protein description                          |
|-----|-------------|-------|------------|-------|------|----------|---------|----------------------------------------------|
| 224 | ARK72_HUMAN | 60    | 15         | 39564 | 6.7  | 5        | 4       | Aflatoxin B1 aldehyde reductase member 2     |
| 225 | AK1A1_HUMAN | 62    | 19         | 36550 | 6.32 | 5        | 4       | Alcohol dehydrogenase [NADP+]                |
| 226 | IDHC_HUMAN  | 125   | 27         | 46630 | 6.53 | 10       | 9       | Isocitrate dehydrogenase [NADP] cytoplasmic  |
| 227 | PGK1_HUMAN  | 87    | 25         | 44586 | 8.3  | 7        | 6       | Phosphoglycerate kinase 1                    |
| 228 | ALDOA_HUMAN | 104   | 33         | 39395 | 8.3  | 9        | 7       | Fructose-bisphosphate aldolase A             |
| 229 | LDHA_HUMAN  |       | 10         | 36665 | 8.44 | 5        | 4       | L-lactate dehydrogenase A chain              |
| 230 | MDHC_HUMAN  | 62    | 16         | 36403 | 6.91 | 5        | 4       | Malate dehydrogenase                         |
| 231 | PGAM1_HUMAN | 141   | 51         | 28786 | 6.67 | 9        | 8       | Phosphoglycerate mutase 1                    |
| 232 | CAH3_HUMAN  | 165   | 56         | 29553 | 6.86 | 10       | 10      | Carbonic anhydrase 3                         |
| 233 | CSRP1_HUMAN | 82    | 54         | 20554 | 8.9  | 10       | 6       | Cysteine and glycine-rich protein 1          |
| 234 | PRDX1_HUMAN | 61    | 20         | 22096 | 8.27 | 7        | 4       | Peroxiredoxin-1                              |
| 235 | PEBP1_HUMAN | 111   | 40         | 21044 | 7.01 | 8        | 7       | Phosphatidylethanolamine-binding protein 1   |
| 236 | PARK7_HUMAN | 68    | 31         | 19878 | 6.33 | 6        | 5       | Protein DJ-1                                 |
| 237 | PRDX2_HUMAN | 99    | 31         | 21878 | 5.66 | 9        | 6       | Peroxiredoxin-2                              |
| 238 | HSPB6_HUMAN | 110   | 78         | 17125 | 5.95 | 9        | 6       | Heat-shock protein beta-6                    |
| 239 | KC1A_HUMAN  | 62    | 16         | 38890 | 9.59 | 9        | 5       | Casein kinase I isoform alpha                |
| 240 | HINT1_HUMAN | 99    | 71         | 13793 | 6.43 | 13       | 6       | Histidine triad nucleotide-binding protein 1 |
| 241 | DEST_HUMAN  | 99    | 48         | 18493 | 8.06 | 9        | 7       | Dextrin                                      |
| 242 | ALBU_HUMAN  | 177   | 23         | 69321 | 5.92 | 13       | 11      | Serum albumin precursor                      |

| No. | Entry name  | Score | Coverage % | Mr     | pI   | Searched | Matched | Protein description                             |
|-----|-------------|-------|------------|--------|------|----------|---------|-------------------------------------------------|
| 243 | LMNA_HUMAN  | 72    | 13         | 74095  | 6.57 | 14       | 8       | Lamin-A/C                                       |
| 244 | PRELP_HUMAN | 61    | 15         | 43782  | 9.47 | 10       | 5       | Prolargin precursor                             |
| 245 | PUR9_HUMAN  | 110   | 24         | 64575  | 6.27 | 12       | 9       | Bifunctional purine biosynthesis protein PURH   |
| 246 | STIP1_HUMAN | 133   | 22         | 62599  | 6.4  | 13       | 12      | Stress-induced-phosphoprotein 1                 |
| 247 | LMNA_HUMAN  | 144   | 21         | 74095  | 6.57 | 15       | 13      | Lamin-A/C                                       |
| 248 | ACON_HUMAN  | 164   | 25         | 85372  | 7.36 | 13       | 13      | Aconitate hydratase, mitochondrial precursor    |
| 249 | LMNA_HUMAN  | 107   | 20         | 74095  | 6.57 | 13       | 10      | Lamin-A/C                                       |
| 250 | IREB1_HUMAN | 142   | 16         | 98337  | 6.23 | 17       | 15      | Iron-responsive element-binding protein 1       |
| 251 | PPIB_HUMAN  | 142   | 42         | 22728  | 9.33 | 8        | 8       | Peptidyl-prolyl cis-trans isomerase B precursor |
| 252 | ALDOA_HUMAN | 125   | 34         | 39395  | 8.3  | 9        | 8       | Fructose-bisphosphate aldolase A                |
| 253 | TRFE_HUMAN  | 115   | 20         | 77000  | 6.81 | 11       | 10      | Serotransferrin precursor (                     |
| 254 | KAD1_HUMAN  | 110   | 32         | 21621  | 8.73 | 8        | 7       | Adenylate kinase isoenzyme 1                    |
| 255 | PPIA_HUMAN  | 109   | 43         | 18001  | 7.68 | 11       | 7       | Peptidyl-prolyl cis-trans isomerase A           |
| 256 | PEBP1_HUMAN | 98    | 49         | 21044  | 7.01 | 9        | 6       | Phosphatidylethanolamine-binding protein 1      |
| 257 | PGK1_HUMAN  | 89    | 21         | 44586  | 8.3  | 6        | 6       | Phosphoglycerate kinase 1                       |
| 258 | WDR1_HUMAN  | 87    | 18         | 66152  | 6.17 | 16       | 9       | WD repeat protein 1                             |
| 259 | ACON_HUMAN  | 83    | 12         | 85372  | 7.36 | 8        | 7       | Aconitate hydratase, mitochondrial precursor    |
| 260 | CO6A1_HUMAN | 82    | 10         | 108462 | 5.26 | 11       | 9       | Collagen alpha-1 chain precursor                |
| 261 | HNRPL_HUMAN | 81    | 17         | 60149  | 6.65 | 14       | 8       | Heterogeneous nuclear ribonucleoprotein L       |

| No. | Entry name  | Score | Coverage % | Mr     | pI   | Searched | Matched | Protein description                                 |
|-----|-------------|-------|------------|--------|------|----------|---------|-----------------------------------------------------|
| 262 | KAD3_HUMAN  | 80    | 31         | 25550  | 9.15 | 10       | 6       | GTP:AMP phosphotransferase mitochondrial            |
| 263 | PRDX1_HUMAN | 79    | 25         | 22096  | 8.27 | 7        | 5       | Peroxiredoxin-1                                     |
| 264 | WDR17_HUMAN | 62    | 7          | 147638 | 6.01 | 9        | 7       | WD repeat protein 17                                |
| 265 | CH10_HUMAN  | 62    | 29         | 10925  | 8.89 | 8        | 4       | 10 kDa heat shock protein, mitochondrial            |
| 266 | LEG3_HUMAN  | 60    | 19         | 26172  | 8.58 | 5        | 4       | Galectin-3                                          |
| 267 | TDRD7_HUMAN | 63    | 8          | 123522 | 6.84 | 14       | 9       | Tudor domain-containing protein 7                   |
| 268 | ATPA_HUMAN  | 60    | 12         | 59714  | 9.16 | 8        | 5       | ATP synthase subunit alpha, mitochondrial precursor |
| 269 | COF1_HUMAN  | 63    | 26         | 18491  | 8.22 | 6        | 4       | Cofilin-1                                           |
| 270 | CO6A1_HUMAN | 70    | 9          | 108462 | 5.26 | 6        | 6       | Collagen alpha-1 chain precursor                    |
| 271 | PPAC3_HUMAN | 61    | 28         | 29429  | 9.98 | 6        | 4       | Probable lipid phosphate phosphatase PPAPDC3        |
| 272 | KIF14_HUMAN | 60    | 5          | 186375 | 8.06 | 9        | 8       | Kinesin-like protein KIF14                          |
| 273 | PSD3_HUMAN  | 64    | 10         | 60156  | 8.83 | 7        | 5       | PH and SEC7 domain-containing protein 3             |
| 274 | TRFE_HUMAN  | 135   | 23         | 77000  | 6.81 | 13       | 13      | Serotransferrin precursor                           |
| 275 | LMNA_HUMAN  | 62    | 14         | 74095  | 6.57 | 14       | 7       | Lamin-A/C (70 kDa lamin                             |
| 276 | CAND2_HUMAN | 60    | 10         | 122604 | 5.58 | 10       | 7       | Cullin-associated NEDD8-dissociated protein 2       |
| 277 | WDR1_HUMAN  | 100   | 31         | 66152  | 6.17 | 18       | 10      | WD repeat protein 1                                 |
| 278 | ALDOC_HUMAN | 65    | 18         | 39431  | 6.41 | 9        | 5       | Fructose-bisphosphate aldolase C                    |
| 279 | NMBR_HUMAN  | 60    | 10         | 43424  | 8.93 | 8        | 5       | Neuromedin-B receptor                               |
| 280 | PS1C1_HUMAN | 63    | 42         | 16568  | 6.28 | 10       | 4       | Psoriasis susceptibility 1 candidate gene 1 protein |



| No. | Entry name  | Score | Coverage % | Mr    | pI   | Searched | Matched | Protein description                          |
|-----|-------------|-------|------------|-------|------|----------|---------|----------------------------------------------|
| 281 | CA163_HUMAN | 61    | 19         | 25720 | 5.66 | 6        | 4       | Hcp beta-lactamase-like protein C1orf163     |
| 282 | TCPZ_HUMAN  | 65    | 16         | 57988 | 6.23 | 11       | 6       | T-complex protein 1 subunit zeta             |
| 283 | A1AT_HUMAN  | 60    | 13         | 46707 | 5.37 | 5        | 4       | Alpha-1-antitrypsin precursor                |
| 284 | CALR_HUMAN  | 60    | 20         | 48112 | 4.29 | 11       | 5       | Calreticulin precursor                       |
| 285 | CALR_HUMAN  | 91    | 28         | 48112 | 4.29 | 13       | 8       | Calreticulin precursor                       |
| 286 | ENPL_HUMAN  | 63    | 9          | 92411 | 4.76 | 9        | 7       | Endoplasmic precursor                        |
| 287 | DESM_HUMAN  | 83    | 28         | 53503 | 5.21 | 15       | 8       | Desmin                                       |
| 288 | TBB2B_HUMAN | 100   | 24         | 49921 | 4.78 | 17       | 11      | Tubulin beta-2B chain                        |
| 289 | TBB2A_HUMAN | 100   | 24         | 49875 | 4.78 | 17       | 11      | Tubulin beta-2A chain                        |
| 290 | ECHM_HUMAN  | 123   | 33         | 31367 | 8.34 | 13       | 9       | Enoyl-CoA hydratase, mitochondrial precursor |
| 291 | PIMT_HUMAN  | 71    | 30         | 24635 | 6.7  | 9        | 5       | Protein-L-isoaspartate O-methyltransferase   |
| 292 | TPIS_HUMAN  | 210   | 72         | 26653 | 6.45 | 16       | 13      | Triosephosphate isomerase                    |
| 293 | DCXR_HUMAN  | 64    | 19         | 25897 | 8.33 | 7        | 4       | L-xylulose reductase                         |
| 295 | PRDX1_HUMAN | 80    | 34         | 22096 | 8.27 | 13       | 6       | Peroxiredoxin-1                              |
| 296 | MAR1_HUMAN  | 64    | 23         | 13149 | 8.29 | 10       | 4       | Melanoma antigen recognized by T-cells 1     |
| 297 | GDIR_HUMAN  | 85    | 22         | 23193 | 5.02 | 11       | 7       | Rho GDP-dissociation inhibitor 1             |
| 298 | VIME_HUMAN  | 72    | 21         | 53619 | 5.06 | 17       | 7       | Vimentin                                     |
| 299 | DESM_HUMAN  | 109   | 31         | 53503 | 5.21 | 14       | 9       | Desmin                                       |
| 300 | PDIA3_HUMAN | 70    | 13         | 56747 | 5.98 | 10       | 6       | Protein disulfide-isomerase A3 precursor     |

| No. | Entry name  | Score | Coverage % | Mr    | pI   | Searched | Matched | Protein description                                                       |
|-----|-------------|-------|------------|-------|------|----------|---------|---------------------------------------------------------------------------|
| 301 | PDIA3_HUMAN | 96    | 21         | 56747 | 5.98 | 13       | 9       | Protein disulfide-isomerase A3 precursor                                  |
| 302 | SBP1_HUMAN  | 89    | 23         | 52280 | 6.13 | 16       | 9       | Selenium-binding protein 1                                                |
| 303 | SYWC_HUMAN  | 61    | 15         | 53132 | 5.83 | 12       | 6       | Tryptophanyl-tRNA synthetase, cytoplasmic                                 |
| 304 | SBP1_HUMAN  | 108   | 22         | 52280 | 6.13 | 17       | 10      | Selenium-binding protein 1                                                |
| 305 | TCPB_HUMAN  | 124   | 28         | 57452 | 6.01 | 14       | 10      | T-complex protein 1 subunit beta                                          |
| 306 | SCOT_HUMAN  | 114   | 33         | 56122 | 7.14 | 12       | 9       | Succinyl-CoA:3-ketoacid-coenzyme A transferase 1, mitochondrial precursor |
| 307 | APOA1_HUMAN | 90    | 25         | 30759 | 5.56 | 12       | 7       | Apolipoprotein A-I precursor                                              |
| 308 | APOA1_HUMAN | 120   | 37         | 30759 | 5.56 | 14       | 10      | Apolipoprotein A-I precursor                                              |
| 309 | ITPA_HUMAN  | 85    | 54         | 21432 | 5.5  | 7        | 5       | Inosine triphosphate pyrophosphatase                                      |
| 310 | TGM2_HUMAN  | 65    | 10         | 77280 | 5.11 | 11       | 6       | Protein-glutamine gamma-glutamyltransferase 2                             |
| 311 | PARK7_HUMAN | 88    | 38         | 19878 | 6.33 | 19       | 9       | Protein DJ-1                                                              |
| 312 | HEBP1_HUMAN | 108   | 55         | 21084 | 5.71 | 14       | 9       | Heme-binding protein 1                                                    |
| 313 | PRDX2_HUMAN | 101   | 35         | 21878 | 5.66 | 8        | 6       | Peroxiredoxin-2                                                           |
| 314 | GSTP1_HUMAN | 92    | 47         | 23341 | 5.43 | 11       | 7       | Glutathione S-transferase P                                               |
| 315 | ANXA2_HUMAN | 61    | 25         | 38580 | 7.57 | 15       | 6       | Annexin A2                                                                |
| 316 | HSPB1_HUMAN | 139   | 38         | 22768 | 5.98 | 9        | 8       | Heat-shock protein beta-1                                                 |
| 317 | GRB2_HUMAN  | 71    | 20         | 25190 | 5.89 | 13       | 7       | Growth factor receptor-bound protein 2                                    |
| 318 | CRSP6_HUMAN | 65    | 9          | 72831 | 7.05 | 13       | 7       | CRSP complex subunit 6                                                    |

| No. | Entry name  | Score | Coverage % | Mr    | pI   | Searched | Matched | Protein description                          |
|-----|-------------|-------|------------|-------|------|----------|---------|----------------------------------------------|
| 319 | HSPB1_HUMAN | 85    | 28         | 22768 | 5.98 | 11       | 6       | Heat-shock protein beta-1                    |
| 320 | PSB3_HUMAN  | 74    | 33         | 22933 | 6.14 | 12       | 7       | Proteasome subunit beta type 3               |
| 321 | NT5C_HUMAN  | 64    | 21         | 23368 | 6.18 | 18       | 6       | 5'-deoxyribonucleotidase, cytosolic type     |
| 322 | HSPB1_HUMAN | 94    | 39         | 22768 | 5.98 | 14       | 7       | Heat-shock protein beta-1                    |
| 323 | PSA2_HUMAN  | 68    | 33         | 25882 | 6.92 | 13       | 6       | Proteasome subunit alpha type 2              |
| 324 | PIMT_HUMAN  | 95    | 43         | 24635 | 6.7  | 15       | 8       | Protein-L-isoaspartate O-methyltransferase   |
| 325 | ES1_HUMAN   | 89    | 44         | 28153 | 8.5  | 12       | 7       | ES1 protein homolog, mitochondrial precursor |
| 326 | HCD2_HUMAN  | 118   | 47         | 26906 | 7.66 | 13       | 10      | 3-hydroxyacyl-CoA dehydrogenase type-2       |
| 327 | BLVRB_HUMAN | 98    | 46         | 22105 | 7.13 | 16       | 9       | Flavin reductase                             |
| 328 | BLVRB_HUMAN | 72    | 51         | 22105 | 7.13 | 18       | 7       | Flavin reductase                             |
| 329 | PRDX1_HUMAN | 117   | 49         | 22096 | 8.27 | 14       | 8       | Peroxiredoxin-1                              |
| 330 | G3P_HUMAN   | 69    | 25         | 36030 | 8.57 | 14       | 6       | Glyceraldehyde-3-phosphate dehydrogenase     |
| 331 | WDR25_HUMAN | 60    | 11         | 60123 | 9.21 | 10       | 6       | WD repeat protein 25 - Homo sapiens          |
| 332 | G3P_HUMAN   | 69    | 25         | 36030 | 8.57 | 14       | 6       | Glyceraldehyde-3-phosphate dehydrogenase     |
| 333 | MTAP_HUMAN  | 62    | 30         | 31230 | 6.75 | 13       | 6       | S-methyl-5-thioadenosine phosphorylase       |
| 334 | PGAM1_HUMAN | 148   | 51         | 28786 | 6.67 | 11       | 10      | Phosphoglycerate mutase 1                    |
| 335 | TPIS_HUMAN  | 187   | 55         | 26653 | 6.45 | 12       | 11      | Triosephosphate isomerase                    |
| 336 | TPIS_HUMAN  | 66    | 20         | 26653 | 6.45 | 11       | 5       | Triosephosphate isomerase                    |
| 337 | ALBU_HUMAN  | 119   | 17         | 69321 | 5.92 | 14       | 12      | Serum albumin precursor - Homo sapiens       |

| No. | Entry name  | Score | Coverage % | Mr    | pI   | Searched | Matched | Protein description                                           |
|-----|-------------|-------|------------|-------|------|----------|---------|---------------------------------------------------------------|
| 338 | PNPH_HUMAN  | 151   | 47         | 32097 | 6.45 | 16       | 13      | Purine nucleoside phosphorylase                               |
| 339 | PGAM1_HUMAN | 141   | 49         | 28786 | 6.67 | 13       | 10      | Phosphoglycerate mutase 1                                     |
| 340 | ECHM_HUMAN  | 95    | 32         | 31367 | 8.34 | 12       | 8       | Enoyl-CoA hydratase, mitochondrial precursor                  |
| 341 | ANXA1_HUMAN | 119   | 34         | 38690 | 6.57 | 14       | 9       | Annexin A1                                                    |
| 342 | BDH_HUMAN   | 60    | 20         | 38132 | 9.11 | 11       | 5       | D-beta-hydroxybutyrate dehydrogenase, mitochondrial precursor |
| 343 | GSTO1_HUMAN | 65    | 19         | 27548 | 6.23 | 10       | 5       | Glutathione transferase omega-1                               |
| 344 | PSME1_HUMAN | 62    | 22         | 28705 | 5.78 | 8        | 5       | Proteasome activator complex subunit 1                        |
| 345 | PSB7_HUMAN  | 61    | 20         | 29946 | 7.57 | 12       | 6       | Proteasome subunit beta type 7 precursor                      |
| 346 | 6PGL_HUMAN  | 60    | 25         | 27530 | 5.7  | 12       | 5       | 6-phosphogluconolactonase                                     |
| 347 | DDAH2_HUMAN | 99    | 35         | 29625 | 5.66 | 11       | 7       | NG,NG-dimethylarginine dimethylaminohydrolase 2               |
| 348 | CATD_HUMAN  | 62    | 8          | 44524 | 6.1  | 5        | 5       | Cathepsin D precursor                                         |
| 349 | CAPZB_HUMAN | 125   | 34         | 31331 | 5.36 | 15       | 11      | F-actin capping protein subunit beta                          |
| 350 | PHB_HUMAN   | 93    | 31         | 29786 | 5.57 | 12       | 7       | Prohibitin - Homo sapiens                                     |
| 351 | NET1_HUMAN  | 65    | 11         | 67690 | 9.13 | 9        | 6       | Netrin-1 precursor - Homo sapiens                             |
| 352 | HSPB1_HUMAN | 84    | 32         | 22768 | 5.98 | 11       | 6       | Heat-shock protein beta-1                                     |
| 353 | GDIR_HUMAN  | 94    | 34         | 23193 | 5.02 | 10       | 7       | Rho GDP-dissociation inhibitor 1                              |
| 354 | HEBP2_HUMAN | 91    | 32         | 22861 | 4.58 | 9        | 6       | Heme-binding protein 2                                        |
| 355 | TPM4_HUMAN  | 97    | 24         | 28504 | 4.67 | 15       | 8       | Tropomyosin alpha-4 chain                                     |

| No. | Entry name  | Score | Coverage % | Mr     | pI   | Searched | Matched | Protein description                                 |
|-----|-------------|-------|------------|--------|------|----------|---------|-----------------------------------------------------|
| 356 | GNA15_HUMAN | 62    | 24         | 43480  | 8.71 | 14       | 7       | Guanine nucleotide-binding protein alpha-15 subunit |
| 357 | HS90B_HUMAN | 77    | 13         | 83212  | 4.97 | 12       | 8       | Heat shock protein HSP 90-bet                       |
| 358 | KPTN_HUMAN  | 123   | 28         | 57900  | 7.96 | 18       | 14      | Kaptin                                              |
| 359 | NADC_HUMAN  | 65    | 21         | 30796  | 5.81 | 11       | 5       | Nicotinate-nucleotide pyrophosphorylase             |
| 360 | ILK_HUMAN   | 61    | 13         | 51386  | 8.3  | 13       | 6       | Integrin-linked protein kinase                      |
| 361 | KLH15_HUMAN | 61    | 7          | 69730  | 5.98 | 7        | 5       | Kelch-like protein 15                               |
| 362 | PSME3_HUMAN | 61    | 29         | 29488  | 5.69 | 23       | 6       | Proteasome activator complex subunit                |
| 363 | RHG25_HUMAN | 60    | 13         | 72385  | 5.83 | 19       | 8       | Rho GTPase-activating protein 25                    |
| 364 | RHOQ_HUMAN  | 60    | 32         | 22645  | 5.94 | 7        | 4       | Rho-related GTP-binding protein RhoQ                |
| 365 | CSRP1_HUMAN | 82    | 54         | 20554  | 8.9  | 10       | 6       | Cysteine and glycine-rich protein 2                 |
| 366 | SAHH_HUMAN  | 118   | 20         | 47685  | 5.92 | 10       | 9       | Adenosylhomocysteinase                              |
| 367 | ADCY5_HUMAN | 141   | 19         | 140757 | 6.9  | 17       | 14      | Adenylate cyclase type 5                            |
| 368 | D104A_HUMAN | 60    | 36         | 8520   | 9.41 | 3        | 3       | Beta-defensin 104                                   |
| 369 | D105A_HUMAN | 69    | 29         | 8916   | 8.71 | 5        | 4       | Beta-defensin 105                                   |
| 370 | DB118_HUMAN | 65    | 20         | 13605  | 6.88 | 5        | 4       | Beta-defensin 118                                   |
| 371 | DB121_HUMAN | 66    | 40         | 8450   | 8.99 | 4        | 3       | Beta-defensin 121                                   |
| 372 | DB129_HUMAN | 139   | 30         | 20285  | 9.04 | 7        | 7       | Beta-defensin 129                                   |
| 373 | DB132_HUMAN | 69    | 53         | 10603  | 9.72 | 4        | 3       | Beta-defensin 132                                   |
| 374 | CADH1_HUMAN | 60    | 6          | 97396  | 4.58 | 6        | 4       | Cadherin-1                                          |

| No. | Entry name  | Score | Coverage % | Mr     | pI   | Searched | Matched | Protein description                                            |
|-----|-------------|-------|------------|--------|------|----------|---------|----------------------------------------------------------------|
| 375 | AKAP4_HUMAN | 80    | 14         | 95842  | 6.56 | 9        | 7       | A-kinase anchor protein 4                                      |
| 376 | CST8_HUMAN  | 61    | 34         | 16265  | 9.05 | 6        | 3       | Cystatin-8                                                     |
| 377 | CST11_HUMAN | 92    | 56         | 16495  | 6.51 | 5        | 4       | Cystatin-11                                                    |
| 378 | CYTC_HUMAN  | 90    | 38         | 15789  | 9    | 4        | 4       | Cystatin-C                                                     |
| 379 | CRIS1_HUMAN | 69    | 21         | 28462  | 5.57 | 6        | 4       | Cysteine-rich secretory protein 1                              |
| 380 | ADA28_HUMAN | 104   | 15         | 87123  | 6.38 | 11       | 8       | Disintegrin and metalloproteinase domain-containing protein 28 |
| 381 | ADAM7_HUMAN | 155   | 22         | 85613  | 6.08 | 13       | 11      | Disintegrin and metalloproteinase domain-containing protein 7  |
| 382 | SAT1_HUMAN  | 102   | 42         | 20011  | 5.09 | 6        | 5       | Diamine acetyltransferase 1                                    |
| 383 | LCN6_HUMAN  | 84    | 47         | 18033  | 4.84 | 6        | 4       | Epididymal-specific lipocalin-6                                |
| 384 | LCN8_HUMAN  | 92    | 41         | 19068  | 6.84 | 7        | 5       | Epididymal-specific lipocalin-8                                |
| 385 | MA2B2_HUMAN | 159   | 21         | 113908 | 6.74 | 15       | 12      | Epididymis-specific alpha-mannosidase                          |
| 386 | EPPI_HUMAN  | 62    | 34         | 15273  | 8.52 | 4        | 3       | Eppin                                                          |
| 387 | ESPB1_HUMAN | 125   | 43         | 26089  | 6.2  | 10       | 7       | Epididymal sperm-binding protein 1                             |
| 388 | LCN12_HUMAN | 111   | 42         | 21486  | 5.48 | 5        | 5       | Epididymal-specific lipocalin-12                               |
| 389 | CAZA3_HUMAN | 129   | 37         | 35002  | 7.61 | 8        | 7       | F-actin-capping protein subunit alpha-3                        |
| 390 | TXND3_HUMAN | 125   | 19         | 67227  | 4.9  | 11       | 9       | Thioredoxin domain-containing protein 3                        |
| 391 | TXND5_HUMAN | 148   | 36         | 47599  | 5.63 | 12       | 9       | Thioredoxin domain-containing protein 5                        |

| No. | Entry name  | Score | Coverage % | Mr     | pI    | Searched | Matched | Protein description                                                           |
|-----|-------------|-------|------------|--------|-------|----------|---------|-------------------------------------------------------------------------------|
| 392 | WDR8_HUMAN  | 162   | 33         | 51555  | 6.37  | 12       | 10      | WD repeat-containing protein 8                                                |
| 393 | WFDC8_HUMAN | 90    | 29         | 27805  | 8.43  | 6        | 5       | WAP four-disulfide core domain protein 8                                      |
| 394 | WFDC6_HUMAN | 62    | 30         | 14616  | 8.64  | 6        | 4       | WAP four-disulfide core domain protein 6                                      |
| 395 | RNAS9_HUMAN | 86    | 35         | 24291  | 6.18  | 8        | 5       | Ribonuclease-like protein 9                                                   |
| 396 | RNS12_HUMAN | 60    | 25         | 17166  | 6.64  | 5        | 3       | Ribonuclease-like protein 12                                                  |
| 397 | RNS13_HUMAN | 79    | 30         | 17833  | 8.87  | 5        | 4       | Ribonuclease-like protein 13                                                  |
| 398 | RNAS4_HUMAN | 68    | 31         | 16829  | 9.3   | 7        | 4       | Ribonuclease 4                                                                |
| 399 | SPAG1_HUMAN | 100   | 15         | 103574 | 6.46  | 11       | 8       | Sperm-associated antigen 1                                                    |
| 400 | GSTP1_HUMAN | 75    | 40         | 23341  | 5.43  | 9        | 5       | Glutathione S-transferase P                                                   |
| 401 | GSTP1_HUMAN | 97    | 48         | 23341  | 5.43  | 15       | 8       | Glutathione S-transferase P                                                   |
| 402 | PA1B3_HUMAN | 67    | 17         | 25718  | 6.33  | 12       | 5       | Platelet-activating factor acetylhydrolase IB subunit gamma                   |
| 403 | UCRI_HUMAN  | 66    | 27         | 29633  | 8.55  | 10       | 5       | Ubiquinol-cytochrome c reductase iron-sulfur subunit, mitochondrial precursor |
| 404 | CATB_HUMAN  | 61    | 22         | 37797  | 5.88  | 12       | 6       | Cathepsin B precursor                                                         |
| 405 | SFRS3_HUMAN | 93    | 41         | 19318  | 11.64 | 10       | 6       | Splicing factor, arginine/serine-rich 3                                       |
| 406 | RAN_HUMAN   | 62    | 17         | 24408  | 7.01  | 10       | 5       | GTP-binding nuclear protein Ran                                               |
| 407 | HAP1_HUMAN  | 61    | 9          | 75467  | 4.68  | 10       | 9       | Huntingtin-associated protein 1                                               |
| 408 | BLVRB_HUMAN | 111   | 56         | 22105  | 7.13  | 11       | 7       | Flavin reductase                                                              |
| 409 | ANXA5_HUMAN | 167   | 42         | 35914  | 4.94  | 14       | 11      | Annexin A5                                                                    |

| No. | Entry name  | Score | Coverage % | Mr     | pI   | Searched | Matched | Protein description                                        |
|-----|-------------|-------|------------|--------|------|----------|---------|------------------------------------------------------------|
| 410 | MIME_HUMAN  | 69    | 13         | 33901  | 5.46 | 11       | 6       | Mimecan precursor                                          |
| 411 | NADC_HUMA   | 62    | 18         | 30796  | 5.81 | 10       | 5       | Nicotinate-nucleotide pyrophosphorylase [carboxylating]    |
| 412 | ANXA4_HUMAN | 135   | 36         | 35860  | 5.84 | 10       | 9       | Annexin A4                                                 |
| 413 | ECH1_HUMAN  | 62    | 18         | 35793  | 8.16 | 11       | 5       | Delta-Delta-dienoyl-CoA isomerase, mitochondrial precursor |
| 414 | SIAS_HUMAN  | 83    | 20         | 40281  | 6.29 | 7        | 6       | Sialic acid synthase                                       |
| 415 | TXNL1_HUMAN | 62    | 29         | 32231  | 4.4  | 8        | 4       | Thioredoxin-like protein 1                                 |
| 416 | DCPS_HUMAN  | 63    | 12         | 38585  | 5.93 | 6        | 4       | Scavenger mRNA decapping enzyme DcpS                       |
| 417 | ALDR_HUMAN  | 69    | 17         | 35830  | 6.51 | 7        | 5       | Aldose reductase                                           |
| 418 | ANXA2_HUMAN | 77    | 17         | 38580  | 7.57 | 8        | 6       | Annexin A2                                                 |
| 419 | ALDOA_HUMAN | 146   | 37         | 39395  | 8.3  | 13       | 10      | Fructose-bisphosphate aldolase A                           |
| 420 | IPYR_HUMAN  | 86    | 29         | 32639  | 5.54 | 8        | 6       | Inorganic pyrophosphatase                                  |
| 421 | APOH_HUMAN  | 64    | 21         | 38273  | 8.34 | 8        | 5       | Beta-2-glycoprotein 1 precursor                            |
| 422 | FIBB_HUMAN  | 62    | 18         | 55892  | 8.54 | 9        | 6       | Fibrinogen beta chain precursor                            |
| 423 | EXTL3_HUMAN | 62    | 8          | 104682 | 6.08 | 6        | 5       | Exostosin-like 3                                           |
| 424 | ASSY_HUMAN  | 63    | 16         | 46501  | 8.08 | 6        | 4       | Argininosuccinate synthase                                 |
| 425 | TOR3A_HUMAN | 57    | 12         | 46169  | 5.67 | 5        | 4       | Torsin-3A precursor                                        |
| 426 | GDIB_HUMAN  | 99    | 30         | 50631  | 6.11 | 15       | 9       | Rab GDP dissociation inhibitor beta                        |
| 427 | SEP11_HUMAN | 80    | 17         | 49367  | 6.36 | 11       | 7       | Septin-11                                                  |
| 428 | ACTZ_HUMAN  | 60    | 13         | 42587  | 6.19 | 5        | 4       | Alpha-centractin                                           |



| No. | Entry name  | Score | Coverage % | Mr     | pI    | Searched | Matched | Protein description                                        |
|-----|-------------|-------|------------|--------|-------|----------|---------|------------------------------------------------------------|
| 429 | NRAP_HUMAN  | 62    | 5          | 196950 | 9.24  | 8        | 8       | Nebulin-related-anchoring protein                          |
| 430 | CD5_HUMAN   | 64    | 13         | 54590  | 8.66  | 5        | 4       | T-cell surface glycoprotein CD5 precursor                  |
| 431 | ACY1_HUMAN  | 148   | 30         | 45856  | 5.77  | 12       | 10      | Aminoacylase-1                                             |
| 432 | SEPT2_HUMAN | 100   | 23         | 41461  | 6.15  | 11       | 8       | Septin-2                                                   |
| 433 | IDHC_HUMAN  | 75    | 14         | 46630  | 6.53  | 8        | 6       | Isocitrate dehydrogenase [NADP] cytoplasmic                |
| 434 | EFTU_HUMAN  | 154   | 27         | 49510  | 7.26  | 14       | 12      | Elongation factor Tu, mitochondrial precursor              |
| 435 | IDHC_HUMAN  | 117   | 29         | 46630  | 6.53  | 12       | 9       | Isocitrate dehydrogenase [NADP] cytoplasmic                |
| 436 | PGK1_HUMAN  | 61    | 22         | 44586  | 8.3   | 12       | 6       | Phosphoglycerate kinase 1                                  |
| 437 | ZN559_HUMAN | 65    | 14         | 62277  | 8.9   | 6        | 5       | Zinc finger protein 559                                    |
| 438 | LZTR1_HUMAN | 60    | 12         | 94658  | 6.12  | 6        | 5       | Leucine-zipper-like transcriptional regulator 1            |
| 439 | DDAH1_HUMAN | 105   | 36         | 31102  | 5.53  | 11       | 8       | NG,NG-dimethylarginine dimethylaminohydrolase 1            |
| 440 | ECH1_HUMAN  | 60    | 15         | 35793  | 8.16  | 5        | 4       | Delta-Delta-dienoyl-CoA isomerase, mitochondrial precursor |
| 441 | HSP71_HUMAN | 121   | 19         | 69995  | 5.48  | 12       | 10      | Heat shock 70 kDa protein 1                                |
| 442 | HSP7C_HUMAN | 79    | 17         | 70854  | 5.37  | 12       | 8       | Heat shock cognate 71 kDa protein                          |
| 443 | GRP78_HUMAN | 108   | 18         | 72288  | 5.07  | 11       | 9       | 78 kDa glucose-regulated protein precursor                 |
| 444 | G3P_HUMAN   | 85    | 26         | 36030  | 8.57  | 10       | 7       | Glyceraldehyde-3-phosphate dehydrogenase                   |
| 445 | VDAC2_HUMAN | 94    | 31         | 38069  | 65.32 | 11       | 7       | Voltage-dependent anion-selective channel protein 2        |
| 446 | GBLP_HUMAN  | 60    | 23         | 35055  | 7.6   | 11       | 5       | Guanine nucleotide-binding protein subunit beta 2-like 1   |
| 447 | ATP4A_HUMAN | 64    | 10         | 114017 | 5.58  | 11       | 7       | Potassium-transporting ATPase alpha chain 1                |

| No. | Entry name  | Score | Coverage % | Mr    | pI   | Searched | Matched | Protein description                            |
|-----|-------------|-------|------------|-------|------|----------|---------|------------------------------------------------|
| 448 | ROA2_HUMAN  | 115   | 31         | 37407 | 8.97 | 10       | 8       | Heterogeneous nuclear ribonucleoproteins A2/B1 |
| 449 | PDIA3_HUMAN | 70    | 16         | 56747 | 5.98 | 11       | 8       | Protein disulfide-isomerase A3 precursor       |
| 450 | GRHPR_HUMAN | 89    | 31         | 35646 | 7.01 | 11       | 7       | Glyoxylate reductase/hydroxypyruvate reductase |
| 451 | IREB1_HUMAN | 87    | 13         | 98337 | 6.23 | 17       | 11      | Iron-responsive element-binding protein 1      |
| 452 | LMNA_HUMAN  | 115   | 23         | 74095 | 6.57 | 16       | 11      | Lamin-A/C                                      |
| 453 | WDR1_HUMAN  | 81    | 17         | 66152 | 6.17 | 14       | 8       | WD repeat protein 1                            |
| 454 | O10X1_HUMAN | 61    | 15         | 34416 | 8.71 | 11       | 6       | Olfactory receptor 10X1                        |
| 455 | TPM4_HUMAN  | 62    | 12         | 28504 | 4.67 | 14       | 6       | Tropomyosin alpha-4 chain                      |
| 456 | ZNF57_HUMAN | 61    | 19         | 64439 | 9.11 | 14       | 8       | Zinc finger protein 57                         |
| 457 | ACTC_HUMAN  | 71    | 20         | 41992 | 5.23 | 11       | 6       | Actin, alpha cardiac muscle 1                  |
| 458 | RCN1_HUMAN  | 91    | 30         | 38866 | 4.86 | 12       | 7       | Reticulocalbin-1 precursor                     |
| 459 | SCRN2_HUMAN | 95    | 25         | 46535 | 5.44 | 14       | 8       | Secernin-2                                     |
| 460 | ACY1_HUMAN  | 126   | 28         | 45856 | 5.77 | 11       | 9       | Aminoacylase-1                                 |
| 461 | AK1A1_HUMAN | 137   | 41         | 36550 | 6.32 | 14       | 10      | Alcohol dehydrogenase [NADP+]                  |
| 463 | PDIA1_HUMAN | 113   | 24         | 57480 | 4.76 | 12       | 9       | Protein disulfide-isomerase                    |
| 464 | TBB2C_HUMAN | 87    | 17         | 50255 | 4.79 | 11       | 7       | Tubulin beta-2C chain                          |
| 465 | TCPE_HUMAN  | 81    | 17         | 60089 | 5.45 | 10       | 8       | T-complex protein 1 subunit epsilon            |
| 466 | ALDH2_HUMAN | 70    | 15         | 56859 | 6.63 | 9        | 6       | Aldehyde dehydrogenase                         |
| 467 | HNRH1_HUMAN | 127   | 29         | 49484 | 5.89 | 9        | 9       | Heterogeneous nuclear ribonucleoprotein H      |

| No. | Entry name  | Score | Coverage % | Mr     | pI    | Searched | Matched | Protein description                           |
|-----|-------------|-------|------------|--------|-------|----------|---------|-----------------------------------------------|
| 468 | HNRH2_HUMAN | 120   | 33         | 49517  | 5.89  | 14       | 11      | Heterogeneous nuclear ribonucleoprotein H2    |
| 469 | NLTP_HUMAN  | 97    | 25         | 59640  | 6.44  | 14       | 10      | Non-specific lipid-transfer protein           |
| 470 | SCOT1_HUMAN | 88    | 24         | 56578  | 7.14  | 13       | 9       | 3-ketoacid-coenzyme A transferase 1           |
| 471 | AL1B1_HUMAN | 94    | 20         | 57658  | 6.36  | 13       | 8       | Aldehyde dehydrogenase X                      |
| 472 | SERA_HUMAN  | 95    | 18         | 57356  | 6.29  | 12       | 8       | D-3-phosphoglycerate dehydrogenase            |
| 473 | IMDH2_HUMAN | 98    | 22         | 56226  | 6.44  | 11       | 8       | Inosine-5'-monophosphate dehydrogenase 2      |
| 474 | RUVB1_HUMAN | 139   | 30         | 50538  | 6.02  | 12       | 10      | RuvB-like 1                                   |
| 475 | RLA2_HUMAN  | 72    | 32         | 11649  | 4.33  | 7        | 4       | 60S acidic ribosomal protein                  |
| 476 | GLNA_HUMAN  | 137   | 26         | 42037  | 6.43  | 14       | 11      | Glutamine synthetase                          |
| 477 | AN13B_HUMAN | 61    | 10         | 70162  | 6.47  | 9        | 6       | Ankyrin repeat domain-containing protein 13B  |
| 478 | TDRD7_HU    | 60    | 7          | 123506 | 6.84  | 9        | 7       | Tudor domain-containing protein 7             |
| 479 | AMPL_HUMAN  | 66    | 24         | 56131  | 8.03  | 17       | 8       | aminopeptidase                                |
| 480 | FSCN1_HUMAN | 103   | 21         | 54496  | 6.84  | 12       | 9       | Fascin                                        |
| 481 | ANX11_HUMAN | 92    | 18         | 54355  | 7.53  | 13       | 9       | Annexin A11                                   |
| 482 | AL7A1_HUMAN | 103   | 21         | 58450  | 8.21  | 12       | 9       | Alpha-aminoadipic semialdehyde dehydrogenase  |
| 483 | YBOX2_HUMAN | 62    | 16         | 38495  | 10.82 | 12       | 5       | Y-box-binding protein 2                       |
| 484 | DLDH_HUMA   | 79    | 15         | 54143  | 7.95  | 9        | 7       | Dihydrolipoyl dehydrogenase                   |
| 485 | AL4A1_HUMAN | 116   | 18         | 61681  | 8.25  | 12       | 9       | Delta-1-pyrroline-5-carboxylate dehydrogenase |
| 486 | DHE3_HUMAN  | 116   | 22         | 61359  | 7.66  | 14       | 12      | Glutamate dehydrogenase 1                     |

| No. | Entry name  | Score | Coverage % | Mr     | pI   | Searched | Matched | Protein description                              |
|-----|-------------|-------|------------|--------|------|----------|---------|--------------------------------------------------|
| 487 | CV028_HUMAN | 77    | 18         | 55175  | 6.77 | 11       | 9       | UPF0027 protein C22orf28                         |
| 488 | FUMH_HUMAN  | 62    | 11         | 54602  | 8.85 | 8        | 5       | Fumarate hydratase                               |
| 489 | TXND5_HUMAN | 70    | 22         | 47599  | 5.63 | 14       | 7       | Thioredoxin domain-containing protein 5          |
| 490 | NDUS1_HUMAN | 74    | 11         | 79417  | 5.89 | 8        | 7       | NADH-ubiquinone oxidoreductase 75 kDa            |
| 491 | LMNB2_HUMAN | 60    | 12         | 67647  | 5.29 | 10       | 7       | Lamin-B2                                         |
| 492 | LEG1_HUMAN  | 84    | 58         | 14706  | 5.34 | 8        | 5       | Galectin-1                                       |
| 493 | CLCN6_HUMAN | 62    | 7          | 97153  | 6.49 | 7        | 6       | Chloride transport protein 6                     |
| 494 | CO6A2_HUMAN | 103   | 11         | 108512 | 5.85 | 11       | 10      | Collagen alpha-2                                 |
| 495 | RAB3D_HUMAN | 61    | 26         | 24252  | 4.76 | 7        | 4       | Ras-related protein Rab-3D                       |
| 496 | PRS10_HUMAN | 71    | 17         | 44145  | 7.1  | 12       | 7       | 26S protease regulatory subunit S10B             |
| 497 | ARK73_HUMAN | 88    | 30         | 37183  | 6.67 | 14       | 8       | Aflatoxin B1 aldehyde reductase member 3         |
| 498 | CK054_HUMAN | 111   | 39         | 35095  | 6.23 | 14       | 9       | Ester hydrolase C11orf54                         |
| 499 | GALE_HUMAN  | 62    | 20         | 38257  | 6.26 | 11       | 5       | UDP-glucose 4-epimerase                          |
| 500 | THTR_HUMAN  | 84    | 29         | 33408  | 6.77 | 12       | 7       | Thiosulfate sulfurtransferase                    |
| 501 | ODPB_HUMAN  | 78    | 28         | 39208  | 6.2  | 13       | 7       | Pyruvate dehydrogenase E1 component subunit beta |
| 502 | GPDA_HUMAN  | 117   | 31         | 37543  | 5.81 | 13       | 10      | Glycerol-3-phosphate dehydrogenase               |
| 503 | HDGF_HUMAN  | 63    | 20         | 26772  | 4.7  | 7        | 4       | Hepatoma-derived growth factor                   |
| 504 | CAPZB_HUMAN | 78    | 25         | 31331  | 5.36 | 13       | 7       | F-actin-capping protein                          |
| 505 | CATD_HUMAN  | 60    | 10         | 44524  | 6.1  | 9        | 5       | Cathepsin D                                      |

| No. | Entry name  | Score | Coverage % | Mr     | pI   | Searched | Matched | Protein description                    |
|-----|-------------|-------|------------|--------|------|----------|---------|----------------------------------------|
| 506 | PEF1_HUMAN  | 64    | 17         | 30361  | 6.1  | 12       | 6       | Peflin                                 |
| 507 | MYL9_HUMAN  | 92    | 29         | 19814  | 4.8  | 6        | 5       | Myosin regulatory light polypeptide 9  |
| 508 | OFD1_HUMAN  | 62    | 8          | 116599 | 5.82 | 10       | 7       | Oral-facial-digital syndrome 1 protein |
| 509 | BTBDA_HUMAN | 61    | 13         | 53746  | 7.66 | 9        | 5       | BTB/POZ domain-containing protein 10   |
| 510 | FLNA_HUMAN  | 60    | 5          | 280564 | 5.7  | 12       | 9       | Filamin-A                              |

**Part II: Proteins identified by 4800 MALDI TOF/TOF Analyzer (not include single-peptide identified proteins)**

| No. | Protein description                               | NCBI<br>accession no. | Sequence<br>coverage% | Matched peptide<br>number | Peptide sequence              | Ion score |
|-----|---------------------------------------------------|-----------------------|-----------------------|---------------------------|-------------------------------|-----------|
| 511 | mitochondrial ATP synthase beta subunit precursor | gi 32189394           | 10                    | 2                         | DQEGQDVLFFIDNIFR              | 64        |
|     |                                                   |                       |                       |                           | IVAVIGAVVDVQFDEGLPPILNALEVQGR | 107       |
| 512 | GRP78 precursor                                   | gi 386758             | 12                    | 6                         | SDIDEIVLVGGSTR                | 103       |
|     |                                                   |                       |                       |                           | ITPSYVAFTPEGER                | 110       |
|     |                                                   |                       |                       |                           | KSDIDEIVLVGGSTR               | 48        |
|     |                                                   |                       |                       |                           | VTHAVVTVPAYFNDAQR             | 125       |
|     |                                                   |                       |                       |                           | DNHLLGTFDLTGIPPAPR            | 144       |
|     |                                                   |                       |                       |                           | IEIESFYEGEDFSETLTR            | 155       |
| 513 | beta-trace protein, prostaglandin D synthase, PGD | gi 404390             | 36                    | 2                         | AQGFTEDSIVFLPQTDK             | 59        |
|     |                                                   |                       |                       |                           | SPHWGSTYSVSVVETDYDHYALLYSQGSK | 137       |
| 514 | Tubulin, beta 2C                                  | gi 23958133           | 10                    | 3                         | FPGQLNADLR                    | 71        |
|     |                                                   |                       |                       |                           | AVLVDLEPGTMDSVR               | 37        |
|     |                                                   |                       |                       |                           | GHYTEGAELVDSVLDVVR            | 94        |

| No. | Protein description                             | NCBI accession no. | Sequence coverage% | Matched peptide number | Peptide sequence                   | Ion score |
|-----|-------------------------------------------------|--------------------|--------------------|------------------------|------------------------------------|-----------|
| 515 | serine proteinase inhibitor, clade A, member 1  | gi 50363217        | 7                  | 2                      | DTVFALVNYIFFK                      | 40        |
|     |                                                 |                    |                    |                        | ELDRDTVFALVNYIFFK                  | 42        |
| 516 | Niemann-Pick disease, type C2 precursor variant | gi 62896507        | 22                 | 2                      | LVVEWQLQDDK                        | 49        |
|     |                                                 |                    |                    |                        | AVVHGILMGVPVFPPIPEPDGCK            | 60        |
| 517 | glutathione S-transferase Mu 3                  | gi 23065552        | 13                 | 2                      | LLLEFTDTSYEEK                      | 56        |
|     |                                                 |                    |                    |                        | LTFVDFLTVDILDQNR                   | 102       |
| 518 | aldehyde dehydrogenase 1A1                      | gi 21361176        | 12                 | 3                      | TIPIDGNFFTYTR                      | 96        |
|     |                                                 |                    |                    |                        | IFVEESIYDEFVR                      | 85        |
|     |                                                 |                    |                    |                        | SPCIVLADADLDNAVEFAHHGVFYHQGCCIAASR | 57        |
| 519 | Unknown (protein for IMAGE:3934797)             | gi 15679996        | 4                  | 3                      | FQNALLVR                           | 45        |
|     |                                                 |                    |                    |                        | VPQVSTPTLVEVSR                     | 53        |
|     |                                                 |                    |                    |                        | KVPQVSTPTLVEVSR                    | 38        |
| 520 | Protein disulfide-isomerase A3 precursor        | gi 220702506       | 10                 | 3                      | ELSDFISYLQR                        | 88        |
|     |                                                 |                    |                    |                        | SDVLELTDDNFESR                     | 106       |

| No. | Protein description                            | NCBI accession no. | Sequence coverage% | Matched peptide number | Peptide sequence         | Ion score |
|-----|------------------------------------------------|--------------------|--------------------|------------------------|--------------------------|-----------|
|     |                                                |                    |                    |                        | TFSHELSDFGLESTAGEIPVVAIR | 223       |
| 521 | Protein disulfide-isomerase A3 precursor       | gi 220702506       | 12                 | 4                      | FLQDYFDGNLK              | 37        |
|     |                                                |                    |                    |                        | ELSDFISYLQR              | 81        |
|     |                                                |                    |                    |                        | SDVLELTDDNFESR           | 79        |
|     |                                                |                    |                    |                        | TFSHELSDFGLESTAGEIPVVAIR | 207       |
| 522 | glutathione S-transferase P                    | gi 4504183         | 15                 | 2                      | PPYTVVYFPVR              | 78        |
|     |                                                |                    |                    |                        | ALPGQLKPFETLLSQNGGK      | 72        |
| 523 | ubiquitin and ribosomal protein S27a precursor | gi 4506713         | 33                 | 2                      | EGIPPDQQR                | 67        |
|     |                                                |                    |                    |                        | TITLEVEPSDTIENVK         | 54        |
| 524 | peroxiredoxin-4                                | gi 5453549         | 16                 | 3                      | QITLNDLPVGR              | 40        |
|     |                                                |                    |                    |                        | DYGVYLED SGHTLR          | 85        |
|     |                                                |                    |                    |                        | EEECHFYAGGQVYPGEASR      | 63        |
| 525 | albumin preproprotein                          | gi 4502027         | 3                  | 2                      | FQNALLVR                 | 37        |
|     |                                                |                    |                    |                        | DVFLGMFLYEYAR            | 38        |
| 526 | albumin preproprotein                          | gi 4502027         | 3                  | 3                      | FQNALLVR                 | 53        |



| No. | Protein description              | NCBI accession no. | Sequence coverage% | Matched peptide number | Peptide sequence   | Ion score |
|-----|----------------------------------|--------------------|--------------------|------------------------|--------------------|-----------|
|     |                                  |                    |                    |                        | DVFLGMFLYEYAR      | 60        |
|     |                                  |                    |                    |                        | DVFLGMFLYEYAR      | 41        |
| 527 | actin, cytoplasmic 2             | gi 4501887         | 8                  | 2                      | QEYDESGPSIVHR      | 38        |
|     |                                  |                    |                    |                        | SYELPDGQVITIGNER   | 94        |
| 528 | actin, cytoplasmic 2             | gi 4501887         | 13                 | 3                      | QEYDESGPSIVHR      | 100       |
|     |                                  |                    |                    |                        | SYELPDGQVITIGNER   | 145       |
|     |                                  |                    |                    |                        | VAPEEHPVLLTEAPLNPK | 66        |
| 529 | Transferrin                      | gi 37747855        | 5                  | 2                      | EGYYGYTGAFR        | 54        |
|     |                                  |                    |                    |                        | DQYELLCLDNTR       | 41        |
| 530 | peroxiredoxin-2 isoform a        | gi 32189392        | 15                 | 3                      | QITVNDLPVGR        | 77        |
|     |                                  |                    |                    |                        | EGGLGPLNIPLLADVTR  | 172       |
|     |                                  |                    |                    |                        | KEGGLGPLNIPLLADVTR | 171       |
| 531 | apolipoprotein A-I preproprotein | gi 4557321         | 9                  | 2                      | THLAPYSDELK        | 82        |
|     |                                  |                    |                    |                        | VSFLSALEEYTK       | 69        |
| 532 | Carbonic anhydrase 2             | gi 157830746       | 21                 | 4                      | GGPLDGTYR          | 51        |
|     |                                  |                    |                    |                        | SADFTNFDPR         | 85        |

| No. | Protein description        | NCBI accession no. | Sequence coverage% | Matched peptide number | Peptide sequence    | Ion score |
|-----|----------------------------|--------------------|--------------------|------------------------|---------------------|-----------|
|     |                            |                    |                    |                        | AVQQPDGLAVLGIFLK    | 110       |
|     |                            |                    |                    |                        | YDPSLKPLSVSYDQATSLR | 110       |
| 533 | peptidylprolyl isomerase A | gi 10863927        | 19                 | 2                      | IIPGFMCQGGDFTR      | 40        |
|     |                            |                    |                    |                        | VNPTVFFDIAVDGEPLGR  | 138       |
| 534 | tubulin beta-2C chain      | gi 5174735         | 8                  | 3                      | YLTVAAVFR           | 46        |
|     |                            |                    |                    |                        | FPGQLNADLR          | 86        |
|     |                            |                    |                    |                        | GHYTEGAELVDSVLDVVR  | 174       |
| 535 | Transferrin                | gi 37747855        | 3                  | 2                      | EGYYGYTGAFR         | 80        |
|     |                            |                    |                    |                        | DQYELLCLDNTR        | 70        |
| 536 | TSA                        | gi 1617118         | 18                 | 2                      | EGGLGPLNIPLLADVTR   | 75        |
|     |                            |                    |                    |                        | KEGGLGPLNIPLLADVTR  | 53        |
| 537 | albumin preproprotein      | gi 4502027         | 3                  | 2                      | FQNALLVR            | 56        |
|     |                            |                    |                    |                        | DVFLGMFLYFYAR       | 76        |
| 538 | Transferrin                | gi 37747855        | 6                  | 4                      | EGYYGYTGAFR         | 83        |
|     |                            |                    |                    |                        | DQYELLCLDNTR        | 91        |
|     |                            |                    |                    |                        | ADRDQYELLCLDNTR     | 89        |

| No. | Protein description                    | NCBI accession no. | Sequence coverage% | Matched peptide number | Peptide sequence               | Ion score |
|-----|----------------------------------------|--------------------|--------------------|------------------------|--------------------------------|-----------|
|     |                                        |                    |                    |                        | SAGWNIPIGLLYCDLPEP             | 128       |
| 539 | biliverdin-IX beta reductase isozyme I | gi 544759          | 28                 | 2                      | TVAGQDAVIVLLGTR                | 96        |
|     |                                        |                    |                    |                        | IAIFGATGQTGLTTLAQAVQAGYEVTVLVR | 157       |
| 540 | albumin preproprotein                  | gi 4502027         | 6                  | 3                      | FQNALLVR                       | 59        |
|     |                                        |                    |                    |                        | DVFLGMFLYEYAR                  | 67        |
|     |                                        |                    |                    |                        | KVPQVSTPTLVEVSR                | 47        |
| 541 | TAGLN                                  | gi 49168456        | 11                 | 3                      | YDEELEER                       | 40        |
|     |                                        |                    |                    |                        | KYDEELEER                      | 54        |
|     |                                        |                    |                    |                        | TDMFQTVDLFEGK                  | 50        |
| 542 | PGK1                                   | gi 48145549        | 16                 | 4                      | LGDVYVNDAFGTAHR                | 142       |
|     |                                        |                    |                    |                        | ALESPERPFLAILGGAK              | 68        |
|     |                                        |                    |                    |                        | VLNNMEIGTSLFDEEGAK             | 114       |
|     |                                        |                    |                    |                        | ITLPVDFVTADKFDENAK             | 88        |
| 543 | Unknown (protein for IMAGE:3934797)    | gi 15679996        | 4                  | 3                      | FQNALLVR                       | 38        |
|     |                                        |                    |                    |                        | VPQVSTPTLVEVSR                 | 64        |
|     |                                        |                    |                    |                        | KVPQVSTPTLVEVSR                | 39        |

| No. | Protein description                        | NCBI accession no. | Sequence coverage% | Matched peptide number | Peptide sequence      | Ion score |
|-----|--------------------------------------------|--------------------|--------------------|------------------------|-----------------------|-----------|
| 544 | Carbonic anhydrase 2                       | gi 157830746       | 17                 | 3                      | SADFTNFDPR            | 67        |
|     |                                            |                    |                    |                        | AVQQPDGLAVLGIFLK      | 85        |
|     |                                            |                    |                    |                        | YDPSLKPLSVSYDQATSLR   | 88        |
| 545 | aldehyde dehydrogenase 1                   | gi 2183299         | 5                  | 2                      | TIPIDGNFFTYTR         | 88        |
|     |                                            |                    |                    |                        | IFVEESYDEFVR          | 107       |
| 546 | Beta-hexosaminidase subunit beta precursor | gi 30749651        | 6                  | 2                      | GSYSLSHVYTPNDVR       | 49        |
|     |                                            |                    |                    |                        | EISEVFPDQFIHLGGDEVEFK | 88        |
| 547 | actin, alpha cardiac muscle 1 proprotein   | gi 4885049         | 7                  | 2                      | IWHHTFYNELR           | 59        |
|     |                                            |                    |                    |                        | SYELPDGQVITIGNER      | 139       |
| 548 | Triosephosphate isomerase                  | gi 999892          | 11                 | 2                      | HVFGESDELIGQK         | 80        |
|     |                                            |                    |                    |                        | DCGATWVVLGHSER        | 63        |
| 549 | unnamed protein product                    | gi 34526803        | 6                  | 2                      | LQFPLPTAQR            | 39        |
|     |                                            |                    |                    |                        | QPQVAELLAEAR          | 38        |
| 550 | Unknown (protein for IMAGE:3934797)        | gi 15679996        | 4                  | 3                      | FQNALLVR              | 56        |
|     |                                            |                    |                    |                        | VPQVSTPTLVEVSR        | 55        |

| No. | Protein description            | NCBI accession no. | Sequence coverage% | Matched peptide number | Peptide sequence   | Ion score |
|-----|--------------------------------|--------------------|--------------------|------------------------|--------------------|-----------|
|     |                                |                    |                    |                        | KVPQVSTPTLVEVSR    | 61        |
| 551 | GRP78 precursor                | gi 386758          | 8                  | 4                      | SDIDEIVLVGGSTR     | 77        |
|     |                                |                    |                    |                        | KSDIDEIVLVGGSTR    | 47        |
|     |                                |                    |                    |                        | DNHLLGTFDLTGIPPAPR | 106       |
|     |                                |                    |                    |                        | IEIESFYEGEDFSETLTR | 78        |
| 552 | glutathione S-transferase Mu 3 | gi 23065552        | 12                 | 2                      | VDIENQVMDFR        | 52        |
|     |                                |                    |                    |                        | LTFVDFLTYDILDQNR   | 165       |
| 553 | albumin preproprotein          | gi 4502027         | 2                  | 2                      | DVFLGMFLYEYAR      | 118       |
|     |                                |                    |                    |                        | DVFLGMFLYEYAR      | 43        |
| 554 | phosphoglycerate kinase 2      | gi 31543397        | 8                  | 2                      | LGDVYVNDAFGTAHR    | 99        |
|     |                                |                    |                    |                        | ALENPVRPFLAILGGAK  | 46        |
| 555 | endoplasmin precursor          | gi 4507677         | 5                  | 3                      | SILFVPTSAPR        | 37        |
|     |                                |                    |                    |                        | GVVDSDDLPLNVSR     | 56        |
|     |                                |                    |                    |                        | EEEAIQLDGLNASQIR   | 79        |
| 556 | aldehyde dehydrogenase 1A1     | gi 21361176        | 5                  | 2                      | TIPIDGNFFTYTR      | 75        |
|     |                                |                    |                    |                        | IFVEESYDEFVR       | 76        |

| No. | Protein description                                   | NCBI accession no. | Sequence coverage% | Matched peptide number | Peptide sequence       | Ion score |
|-----|-------------------------------------------------------|--------------------|--------------------|------------------------|------------------------|-----------|
| 557 | heat shock protein 27                                 | gi 662841          | 21                 | 3                      | LFDQAFGLPR             | 65        |
|     |                                                       |                    |                    |                        | VSLDVNHFAPDELTVK       | 64        |
|     |                                                       |                    |                    |                        | LATQSNEITIPVTFESR      | 111       |
| 558 | aldehyde dehydrogenase 1                              | gi 2183299         | 7                  | 3                      | QAFQIGSPWR             | 47        |
|     |                                                       |                    |                    |                        | TIPIDGNFFTYTR          | 107       |
|     |                                                       |                    |                    |                        | IFVEESIYDEFVR          | 103       |
| 559 | actin, cytoplasmic 2                                  | gi 4501887         | 7                  | 2                      | IWHHTFYNELR            | 70        |
|     |                                                       |                    |                    |                        | SYELPDGQVITIGNER       | 128       |
| 560 | chaperonin containing TCP1, subunit 2 (beta), isoform | gi 119617636       | 11                 | 3                      | QVLLSAAEAAEVILR        | 86        |
|     |                                                       |                    |                    |                        | LIHFSGVALGEACTIVLR     | 101       |
|     |                                                       |                    |                    |                        | VQDDEVGDGTTSVTVLAAELLR | 178       |
| 561 | albumin preproprotein                                 | gi 4502027         | 6                  | 3                      | FQNALLVR               | 62        |
|     |                                                       |                    |                    |                        | DVFLGMFLYEYAR          | 83        |
|     |                                                       |                    |                    |                        | KVPQVSTPTLVEVSR        | 47        |
| 562 | Nitrilase family, member 2                            | gi 18088311        | 9                  | 2                      | FAELAQIYAQR            | 66        |

| No. | Protein description                               | NCBI accession no. | Sequence coverage% | Matched peptide number | Peptide sequence            | Ion score |
|-----|---------------------------------------------------|--------------------|--------------------|------------------------|-----------------------------|-----------|
|     |                                                   |                    |                    |                        | AVDNQVYVATASPAR             | 100       |
| 563 | heat shock cognate 71 kDa protein isoform 1 [Homo | gi 5729877         | 13                 | 5                      | FEELNADLFR                  | 56        |
|     |                                                   |                    |                    |                        | TTPSYVAFTDTER               | 74        |
|     |                                                   |                    |                    |                        | STAGDTHLGGEDFDNR            | 75        |
|     |                                                   |                    |                    |                        | TVTNAVVTVPAYFNDSQR          | 106       |
|     |                                                   |                    |                    |                        | TLSSSTQASIEIDSLYEGIDFYTSITR | 140       |
| 564 | creatine kinase B-type                            | gi 21536286        | 25                 | 6                      | DLFDPIIEDR                  | 55        |
|     |                                                   |                    |                    |                        | VLTPELYAELR                 | 58        |
|     |                                                   |                    |                    |                        | LAVEALSSLDGDLAGR            | 115       |
|     |                                                   |                    |                    |                        | TFLVWVNEEDHLR               | 63        |
|     |                                                   |                    |                    |                        | GTGGVDTAAVGGVFDVSNADR       | 151       |
|     |                                                   |                    |                    |                        | TDLNPDNLQGGDDLDPNYVLSSR     | 175       |
| 565 | ezrin                                             | gi 21614499        | 6                  | 3                      | ALQLEER                     | 41        |
|     |                                                   |                    |                    |                        | QLLTLSELSQAR                | 74        |
|     |                                                   |                    |                    |                        | SQEQLAAELAETAK              | 47        |

| No. | Protein description                                   | NCBI accession no. | Sequence coverage% | Matched peptide number | Peptide sequence         | Ion score |
|-----|-------------------------------------------------------|--------------------|--------------------|------------------------|--------------------------|-----------|
| 566 | Epididymal secretory glutathione peroxidase precursor | gi 116667974       | 11                 | 3                      | FLVGPDGIPVMR             | 41        |
|     |                                                       |                    |                    |                        | FLVGPDGIPVMR             | 41        |
|     |                                                       |                    |                    |                        | GTIYDYEAIALNK            | 78        |
| 567 | Fatty acid-binding protein, adipocyte                 | gi 52695841        | 20                 | 2                      | LVSENFDDYMK              | 80        |
|     |                                                       |                    |                    |                        | STITLDGGVLVHVQK          | 63        |
| 568 | albumin preproprotein                                 | gi 4502027         | 2                  | 2                      | DVFLGMFLYEYAR            | 87        |
|     |                                                       |                    |                    |                        | DVFLGMFLYEYAR            | 58        |
| 569 | Triosephosphate isomerase                             | gi 999892          | 11                 | 3                      | HVFGESDELIGQK            | 103       |
|     |                                                       |                    |                    |                        | TATPQQAQEVHEK            | 47        |
|     |                                                       |                    |                    |                        | RHVFGESDELIGQK           | 41        |
| 570 | Glyceraldehyde-3-phosphate dehydrogenase              | gi 67464043        | 16                 | 3                      | VPTANVSVVDLTCR           | 98        |
|     |                                                       |                    |                    |                        | LISWYDNEFGYSNR           | 137       |
|     |                                                       |                    |                    |                        | VIHDNFGIVEGLMTTVHAITATQK | 73        |
| 571 | methylthioadenosine phosphorylase                     | gi 847724          | 12                 | 2                      | IGIIGGTGLDDPEILEGR       | 50        |



| No. | Protein description                      | NCBI accession no. | Sequence coverage% | Matched peptide number | Peptide sequence  | Ion score |
|-----|------------------------------------------|--------------------|--------------------|------------------------|-------------------|-----------|
|     |                                          |                    |                    |                        | EIQPGDIVIIDQFIDR  | 96        |
| 572 | aldehyde dehydrogenase 1A1               | gi 21361176        | 5                  | 2                      | TIPIDGNFFTYTR     | 86        |
|     |                                          |                    |                    |                        | IFVEESYDEFVR      | 73        |
| 573 | hypothetical protein                     | gi 31873302        | 7                  | 2                      | VVIGMDVAASEFFR    | 48        |
|     |                                          |                    |                    |                        | AAVPSGASTGIYEALRL | 101       |
| 574 | albumin preproprotein                    | gi 4502027         | 2                  | 2                      | DVFLGMFLYEYAR     | 70        |
|     |                                          |                    |                    |                        | DVFLGMFLYEYAR     | 45        |
| 575 | TAGLN                                    | gi 49168456        | 11                 | 2                      | KYDEELEER         | 58        |
|     |                                          |                    |                    |                        | TDMFQTVDLFEGK     | 48        |
| 576 | hypothetical protein                     | gi 31873302        | 10                 | 3                      | YISPDQLADLYK      | 61        |
|     |                                          |                    |                    |                        | VVIGMDVAASEFFR    | 64        |
|     |                                          |                    |                    |                        | AAVPSGASTGIYEALRL | 168       |
| 577 | hypothetical protein                     | gi 31873302        | 10                 | 3                      | YISPDQLADLYK      | 45        |
|     |                                          |                    |                    |                        | VVIGMDVAASEFFR    | 48        |
|     |                                          |                    |                    |                        | AAVPSGASTGIYEALRL | 142       |
| 578 | Proteasome (prosome, macropain) subunit, | gi 13543551        | 13                 | 2                      | NQYDNDVTWVSPQGR   | 87        |

| No. | Protein description                       | NCBI accession no. | Sequence coverage% | Matched peptide number | Peptide sequence    | Ion score |
|-----|-------------------------------------------|--------------------|--------------------|------------------------|---------------------|-----------|
|     | alpha type                                |                    |                    |                        |                     |           |
|     |                                           |                    |                    |                        | ILHVDNHIGISIAGLTADA | 138       |
| 579 | hypothetical protein                      | gi 31873439        | 7                  | 2                      | LISQIVSSITASLR      | 54        |
|     |                                           |                    |                    |                        | FDGALNVDLTFQTNLVP   | 95        |
| 580 | beta globin chain variant                 | gi 13549112        | 17                 | 2                      | VNVDEVGGEALGR       | 38        |
|     |                                           |                    |                    |                        | EFTQPVQAAYQK        | 54        |
| 581 | Human Muscle Pyruvate Kinase              | gi 67464392        | 6                  | 2                      | FGVEQDVDMVFASFIR    | 53        |
|     |                                           |                    |                    |                        | EAEAAIYHLQLFEELR    | 104       |
| 582 | T-complex protein 1 subunit eta isoform b | gi 58331185        | 8                  | 2                      | CQVFEETQIGGER       | 60        |
|     |                                           |                    |                    |                        | LPIGDVATQYFADR      | 41        |
| 583 | albumin preproprotein                     | gi 4502027         | 11                 | 5                      | FQNALLVR            | 40        |
|     |                                           |                    |                    |                        | HPDYSVLLLLR         | 40        |
|     |                                           |                    |                    |                        | KVPQVSTPTLVEVSR     | 42        |
|     |                                           |                    |                    |                        | RPCFSALEVDETYVPK    | 47        |
|     |                                           |                    |                    |                        | VFDEFKPLVEEPQNLIK   | 64        |
| 584 | Transferrin                               | gi 37747855        | 6                  | 3                      | EGYYGYTGAFR         | 67        |

| No. | Protein description            | NCBI accession no. | Sequence coverage% | Matched peptide number | Peptide sequence             | Ion score |
|-----|--------------------------------|--------------------|--------------------|------------------------|------------------------------|-----------|
|     |                                |                    |                    |                        | KPVEEYANCHLAR                | 60        |
|     |                                |                    |                    |                        | ADRDQYELLCLDNTR              | 58        |
| 585 | Oxy-Human Hemoglobin           | gi 37928140        | 42                 | 3                      | VGAHAGEYGAEALER              | 119       |
|     |                                |                    |                    |                        | TYFPFDLSHGSAQVK              | 126       |
|     |                                |                    |                    |                        | VADALTNVAHVDDMPNALSALSDLHAHK | 104       |
| 586 | Transferrin                    | gi 37747855        | 8                  | 4                      | EGYYGYTGAFR                  | 78        |
|     |                                |                    |                    |                        | KPVEEYANCHLAR                | 64        |
|     |                                |                    |                    |                        | ADRDQYELLCLDNTR              | 59        |
|     |                                |                    |                    |                        | NLNEKDYELLCLDGTR             | 57        |
| 587 | Adenylate kinase isoenzyme 1   | gi 66361358        | 19                 | 3                      | EVQQGEEFER                   | 83        |
|     |                                |                    |                    |                        | YGYTHLSTGDLLR                | 104       |
|     |                                |                    |                    |                        | GQLVPLETVLDMLR               | 50        |
| 588 | Chain A, Human Peroxiredoxin 5 | gi 15826629        | 23                 | 3                      | THLPGFVEQAEALK               | 82        |
|     |                                |                    |                    |                        | VGDAIPAVEVFEGEPGNK           | 81        |
|     |                                |                    |                    |                        | ETDLLLDDSLVSIFGNR            | 173       |
| 589 | Transthyretin precursor        | gi 230651          | 31                 | 2                      | YTIAALLSPYSYSTTAVVTNPK       | 82        |

| No. | Protein description                                   | NCBI accession no. | Sequence coverage% | Matched peptide number | Peptide sequence             | Ion score |
|-----|-------------------------------------------------------|--------------------|--------------------|------------------------|------------------------------|-----------|
|     |                                                       |                    |                    |                        | ALGISPFHEHAEVVFTANDSGPR      | 147       |
| 590 | SH3 domain-binding glutamic acid-rich-like protein    | gi 4506925         | 47                 | 3                      | GDYDAFFEAR                   | 78        |
|     |                                                       |                    |                    |                        | ENNAVYAFGLTAPPGSK            | 63        |
|     |                                                       |                    |                    |                        | ENVPENSRPATGYLPPQIFNESQYR    | 82        |
| 591 | Nm23 protein                                          | gi 35068           | 14                 | 2                      | DRPFFAGLVK                   | 50        |
|     |                                                       |                    |                    |                        | TFIAIKPDGVQR                 | 49        |
| 592 | nucleoside phosphorylase                              | gi 157168362       | 25                 | 4                      | DHINLPGFSGQNPLR              | 71        |
|     |                                                       |                    |                    |                        | LGADAVGMSTVPEVIVAR           | 48        |
|     |                                                       |                    |                    |                        | LTQAQIFDYGEIPNFPR            | 99        |
|     |                                                       |                    |                    |                        | ELQEGTYVMVAGPSFETVAECR       | 46        |
| 593 | phenazine biosynthesis-like domain-containing protein | gi 62177133        | 15                 | 2                      | GEPGGQTQAFDFYSR              | 115       |
|     |                                                       |                    |                    |                        | RAEDGIVLDLPLYPAHPQDFHEVEDLIK | 50        |
| 594 | heat shock protein 27                                 | gi 662841          | 21                 | 3                      | LFDQAFGLPR                   | 79        |
|     |                                                       |                    |                    |                        | VSLDVNHFAPELTVK              | 90        |

| No. | Protein description     | NCBI accession no. | Sequence coverage% | Matched peptide number | Peptide sequence    | Ion score |
|-----|-------------------------|--------------------|--------------------|------------------------|---------------------|-----------|
|     |                         |                    |                    |                        | LATQSNEITIPVTFESR   | 120       |
| 595 | Transferrin             | gi 37747855        | 8                  | 4                      | EGYYGYTGAFR         | 64        |
|     |                         |                    |                    |                        | KPVEEYANCHLAR       | 52        |
|     |                         |                    |                    |                        | ADRDQYELLCLDNTR     | 44        |
|     |                         |                    |                    |                        | NLNEKDYELLCLDGTR    | 57        |
| 596 | albumin preproprotein   | gi 4502027         | 13                 | 6                      | FQNALLVR            | 41        |
|     |                         |                    |                    |                        | AVMDDFAAFVEK        | 43        |
|     |                         |                    |                    |                        | RHPDYSVLLLLR        | 45        |
|     |                         |                    |                    |                        | KVPQVSTPTLVEVSR     | 58        |
|     |                         |                    |                    |                        | RPCFSALEVDETYVPK    | 56        |
|     |                         |                    |                    |                        | VFDEFKPLVEEPQNLIK   | 78        |
| 597 | Hemoglobin subunit beta | gi 3660145         | 41                 | 4                      | VNVDEVGGEALGR       | 47        |
|     |                         |                    |                    |                        | EFTPPVQAAYQK        | 58        |
|     |                         |                    |                    |                        | VLGAFSDGLAHLNLK     | 111       |
|     |                         |                    |                    |                        | FFESFGDLSTPDAVMGNPK | 112       |
| 598 | Hemoglobin subunit beta | gi 3660145         | 48                 | 5                      | LLVVPWTQR           | 41        |

| No. | Protein description     | NCBI accession no. | Sequence coverage% | Matched peptide number | Peptide sequence    | Ion score |
|-----|-------------------------|--------------------|--------------------|------------------------|---------------------|-----------|
|     |                         |                    |                    |                        | VNVDEVGGEALGR       | 39        |
|     |                         |                    |                    |                        | EFTPPVQAAYQK        | 39        |
|     |                         |                    |                    |                        | VLGAFSDGLAHLNLK     | 85        |
|     |                         |                    |                    |                        | FFESFGDLSTPDAVMGNPK | 65        |
| 599 | Transferrin             | gi 37747855        | 8                  | 4                      | EGYYGYTGAFR         | 86        |
|     |                         |                    |                    |                        | KPVEEYANCHLAR       | 69        |
|     |                         |                    |                    |                        | ADRDQYELLCLDNTR     | 77        |
|     |                         |                    |                    |                        | NLNEKDYELLCLDGTR    | 107       |
| 600 | TAGLN                   | gi 49168456        | 13                 | 2                      | KYDEELEER           | 53        |
|     |                         |                    |                    |                        | LVEWIIQCQPDVGRPDR   | 52        |
| 601 | peroxiredoxin 1         | gi 55959887        | 11                 | 2                      | TIAQDYGVLK          | 50        |
|     |                         |                    |                    |                        | QITVNDLPVGR         | 73        |
| 602 | Hemoglobin subunit beta | gi 3660145         | 41                 | 4                      | VNVDEVGGEALGR       | 74        |
|     |                         |                    |                    |                        | EFTPPVQAAYQK        | 69        |
|     |                         |                    |                    |                        | VLGAFSDGLAHLNLK     | 105       |
|     |                         |                    |                    |                        | FFESFGDLSTPDAVMGNPK | 110       |

| No. | Protein description                      | NCBI accession no. | Sequence coverage% | Matched peptide number | Peptide sequence           | Ion score |
|-----|------------------------------------------|--------------------|--------------------|------------------------|----------------------------|-----------|
| 603 | Glyceraldehyde-3-phosphate dehydrogenase | gi 67464043        | 8                  | 2                      | VPTANVSVVDLTCR             | 93        |
|     |                                          |                    |                    |                        | LISWYDNEFGYSNR             | 111       |
| 604 | Protein DJ-1                             | gi 33358055        | 36                 | 3                      | GPGTSFEFALAIVEALNGK        | 52        |
|     |                                          |                    |                    |                        | GLIAAICAGPTALLAHEIGFGSK    | 96        |
|     |                                          |                    |                    |                        | EGPYDVVVLPGGNLGAQNLSESAAVK | 141       |
| 605 | Human Serum Albumin                      | gi 157830361       | 14                 | 6                      | FQNALLVR                   | 59        |
|     |                                          |                    |                    |                        | AVMDDFAAFVEK               | 45        |
|     |                                          |                    |                    |                        | KVPQVSTPTLVEVSR            | 60        |
|     |                                          |                    |                    |                        | RPCFSALEVDETYVPK           | 69        |
|     |                                          |                    |                    |                        | VFDEFKPLVEEPQNLIK          | 112       |
|     |                                          |                    |                    |                        | EFNAETFTFHADICTLSEK        | 76        |
| 606 | Human Serum Albumin                      | gi 157830361       | 12                 | 5                      | FQNALLVR                   | 45        |
|     |                                          |                    |                    |                        | KVPQVSTPTLVEVSR            | 57        |
|     |                                          |                    |                    |                        | RPCFSALEVDETYVPK           | 70        |
|     |                                          |                    |                    |                        | VFDEFKPLVEEPQNLIK          | 73        |

| No. | Protein description                            | NCBI accession no. | Sequence coverage% | Matched peptide number | Peptide sequence              | Ion score |
|-----|------------------------------------------------|--------------------|--------------------|------------------------|-------------------------------|-----------|
|     |                                                |                    |                    |                        | EFNAETFFHADICTLSEK            | 82        |
| 607 | ABHD14B protein                                | gi 30047108        | 33                 | 5                      | EALPGSGQAR                    | 45        |
|     |                                                |                    |                    |                        | FSVLLHGIR                     | 70        |
|     |                                                |                    |                    |                        | EGTIQVQGQALFFR                | 109       |
|     |                                                |                    |                    |                        | FSSETWQNLGTLHR                | 85        |
|     |                                                |                    |                    |                        | TPALIVYGDQDPMGQTSFEHLK        | 59        |
| 608 | glutathione S-transferase                      | gi 4504183         | 13                 | 2                      | PPYTVVYFPVR                   | 54        |
|     |                                                |                    |                    |                        | FQDGDLTLYQSNTILR              | 105       |
| 609 | serine proteinase inhibitor, clade A, member 1 | gi 50363217        | 8                  | 2                      | LQHLENELTHDIITK               | 69        |
|     |                                                |                    |                    |                        | VFSNGADLSGVTEEAPLK            | 64        |
| 610 | hemoglobin subunit alpha                       | gi 4504345         | 42                 | 3                      | VGAHAGEYGAEALER               | 122       |
|     |                                                |                    |                    |                        | TYFPHFDLSHGSAQVK              | 131       |
|     |                                                |                    |                    |                        | VADALTNVAHAVDDMPNALSALSDLHAHK | 118       |
| 611 | mammary-derived growth inhibitor               | gi 1869803         | 18                 | 3                      | WDGQETTLVR                    | 71        |
|     |                                                |                    |                    |                        | LGVEFDETTADDR                 | 101       |



| No. | Protein description                                              | NCBI accession no. | Sequence coverage% | Matched peptide number | Peptide sequence      | Ion score |
|-----|------------------------------------------------------------------|--------------------|--------------------|------------------------|-----------------------|-----------|
|     |                                                                  |                    |                    |                        | LGVEFDETTADDRK        | 56        |
| 612 | Haloacid dehalogenase-like hydrolase domain-containing protein 2 | gi 251837027       | 19                 | 3                      | TFFLEALR              | 49        |
|     |                                                                  |                    |                    |                        | DGLALGPGPFVTALEYATDTK | 40        |
|     |                                                                  |                    |                    |                        | KLEFDISEDEIFTSLTAAR   | 173       |
| 613 | nucleoside phosphorylase                                         | gi 157168362       | 11                 | 2                      | DHINLPGFSGQNPLR       | 38        |
|     |                                                                  |                    |                    |                        | LTQAQIFDYGEIPNFPR     | 37        |
| 614 | actin, cytoplasmic 2                                             | gi 4501887         | 13                 | 3                      | QEYDESGPSIVHR         | 78        |
|     |                                                                  |                    |                    |                        | SYELPDGQVITIGNER      | 109       |
|     |                                                                  |                    |                    |                        | VAPEEHPVLLTEAPLNPK    | 75        |
| 615 | aflatoxin B1 aldehyde reductase member 2                         | gi 41327764        | 8                  | 2                      | QVETELFPCLR           | 40        |
|     |                                                                  |                    |                    |                        | ALQAAYGASAPSVTSAALR   | 121       |
| 616 | Glyceraldehyde-3-phosphate dehydrogenase                         | gi 67464043        | 8                  | 2                      | VPTANVSVDLTCR         | 119       |
|     |                                                                  |                    |                    |                        | LISWYDNEFGYSNR        | 101       |
| 617 | Valosin-containing protein                                       | gi 111305821       | 5                  | 2                      | LIVDEAINEDNSVVSLSQPK  | 101       |

| No. | Protein description                      | NCBI accession no. | Sequence coverage% | Matched peptide number | Peptide sequence     | Ion score |
|-----|------------------------------------------|--------------------|--------------------|------------------------|----------------------|-----------|
|     |                                          |                    |                    |                        | EDEEESLNEVGYYDDIGGCR | 44        |
| 618 | nucleoside phosphorylase                 | gi 157168362       | 17                 | 3                      | DHINLPGFSGQNPLR      | 99        |
|     |                                          |                    |                    |                        | LGADAVGMSTVPEVIVAR   | 61        |
|     |                                          |                    |                    |                        | LTQAQIFDYGEIPNFPR    | 119       |
| 619 | Glyceraldehyde-3-phosphate dehydrogenase | gi 67464043        | 8                  | 2                      | VPTANVSVVLTSCR       | 96        |
|     |                                          |                    |                    |                        | LISWYDNEFGYSNR       | 88        |
| 620 | Human Serum Albumin                      | gi 157830361       | 12                 | 5                      | FQNALLVR             | 37        |
|     |                                          |                    |                    |                        | KVPQVSTPTLVEVSR      | 57        |
|     |                                          |                    |                    |                        | RPCFSALEVDETYVPK     | 56        |
|     |                                          |                    |                    |                        | VFDEFKPLVEEPQNLIK    | 65        |
|     |                                          |                    |                    |                        | EFNAETFTFHADICTLSEK  | 42        |
| 621 | Transferrin                              | gi 37747855        | 8                  | 4                      | EGYYGYTGAFR          | 76        |
|     |                                          |                    |                    |                        | KPVEEYANCHLAR        | 51        |
|     |                                          |                    |                    |                        | ADRDQYELLCLDNTR      | 85        |
|     |                                          |                    |                    |                        | NLNEKDYELLCLDGTR     | 86        |

| No. | Protein description                      | NCBI accession no. | Sequence coverage% | Matched peptide number | Peptide sequence    | Ion score |
|-----|------------------------------------------|--------------------|--------------------|------------------------|---------------------|-----------|
| 622 | ALB protein                              | gi 23241675        | 17                 | 4                      | KVPQVSTPTLVEVSR     | 72        |
|     |                                          |                    |                    |                        | RPCFSALEVDETYVPK    | 37        |
|     |                                          |                    |                    |                        | VFDEFKPLVEEPQNLIK   | 104       |
|     |                                          |                    |                    |                        | EFNAETFTFHADICTLSEK | 50        |
| 623 | peroxiredoxin-2 isoform a                | gi 32189392        | 15                 | 3                      | QITVNDLPVGR         | 62        |
|     |                                          |                    |                    |                        | EGGLGPLNIPLLADVTR   | 147       |
|     |                                          |                    |                    |                        | KEGGLGPLNIPLLADVTR  | 171       |
| 624 | Human Serum Albumin                      | gi 157830361       | 7                  | 3                      | HPDYSVLLLR          | 49        |
|     |                                          |                    |                    |                        | KVPQVSTPTLVEVSR     | 45        |
|     |                                          |                    |                    |                        | VFDEFKPLVEEPQNLIK   | 63        |
| 625 | Glyceraldehyde-3-phosphate dehydrogenase | gi 67464043        | 8                  | 2                      | VPTANVSVDLTCR       | 43        |
|     |                                          |                    |                    |                        | LISWYDNEFGYSNR      | 54        |
| 626 | Adenylate kinase isoenzyme 1             | gi 66361358        | 12                 | 2                      | EVQQGEEFER          | 80        |
|     |                                          |                    |                    |                        | YGYTHLSTGDLLR       | 108       |
| 627 | enolase 1 variant                        | gi 62896593        | 15                 | 4                      | YISPDQLADLYK        | 49        |

| No. | Protein description   | NCBI accession no. | Sequence coverage% | Matched peptide number | Peptide sequence     | Ion score |
|-----|-----------------------|--------------------|--------------------|------------------------|----------------------|-----------|
|     |                       |                    |                    |                        | VVIGMDVAASEFFR       | 56        |
|     |                       |                    |                    |                        | AAVPSGASTGIYEALER    | 131       |
|     |                       |                    |                    |                        | FTASAGIQVVGDDLTVTNPK | 79        |
| 628 | albumin preproprotein | gi 4502027         | 8                  | 3                      | AVMDDFAAFVEK         | 75        |
|     |                       |                    |                    |                        | RPCFSALEVDETYVPK     | 108       |
|     |                       |                    |                    |                        | EFNAETFTFHADICTLSEK  | 118       |
| 629 | Tubulin, beta 2C      | gi 23958133        | 12                 | 4                      | FPGQLNADLR           | 60        |
|     |                       |                    |                    |                        | INVYYNEATGGK         | 37        |
|     |                       |                    |                    |                        | AVLVDLEPGTMDSVR      | 50        |
|     |                       |                    |                    |                        | GHYTEGAELVDSVLDVVR   | 103       |
| 630 | actin, cytoplasmic 2  | gi 4501887         | 15                 | 4                      | GYSFTTTAER           | 45        |
|     |                       |                    |                    |                        | QEYDESGPSIVHR        | 94        |
|     |                       |                    |                    |                        | SYELPDGQVITIGNER     | 118       |
|     |                       |                    |                    |                        | VAPEEHPVLLTEAPLNPK   | 68        |
| 631 | hypothetical protein  | gi 31873302        | 7                  | 2                      | YISPDQLADLYK         | 49        |
|     |                       |                    |                    |                        | AAVPSGASTGIYEALER    | 131       |

| No. | Protein description                            | NCBI accession no. | Sequence coverage% | Matched peptide number | Peptide sequence      | Ion score |
|-----|------------------------------------------------|--------------------|--------------------|------------------------|-----------------------|-----------|
| 632 | Prostaglandin reductase 2                      | gi 208435567       | 5                  | 2                      | MEEVYLPDNINEGQVQVR    | 65        |
|     |                                                |                    |                    |                        | MEEVYLPDNINEGQVQVR    | 116       |
| 633 | ALB protein                                    | gi 23241675        | 22                 | 6                      | FQNALLVR              | 61        |
|     |                                                |                    |                    |                        | AVMDDFAAFVEK          | 63        |
|     |                                                |                    |                    |                        | KVPQVSTPTLVEVSR       | 92        |
|     |                                                |                    |                    |                        | RPCFSALEVDETYVPK      | 95        |
|     |                                                |                    |                    |                        | VFDEFKPLVEEPQNLIK     | 123       |
|     |                                                |                    |                    |                        | EFNAETTFHADICTLSEK    | 106       |
| 634 | Tubulin, beta 2C                               | gi 23958133        | 6                  | 2                      | FPGQLNADLR            | 58        |
|     |                                                |                    |                    |                        | GHYTEGAELVDSVLDVVR    | 118       |
| 635 | serine proteinase inhibitor, clade A, member 1 | gi 50363217        | 8                  | 2                      | LQHLENELTHDIITK       | 78        |
|     |                                                |                    |                    |                        | VFSNGADLSGVTEEAPLK    | 92        |
| 636 | unnamed protein product                        | gi 35440           | 17                 | 2                      | MPPFPVNHGASSEDLLK     | 40        |
|     |                                                |                    |                    |                        | VNFHFILFNNVDGHLVELDGR | 73        |
| 637 | Protein DJ-1                                   | gi 42543006        | 24                 | 2                      | GPGTSFEFALAIVEALNGK   | 45        |

| No. | Protein description                      | NCBI accession no. | Sequence coverage% | Matched peptide number | Peptide sequence                    | Ion score |
|-----|------------------------------------------|--------------------|--------------------|------------------------|-------------------------------------|-----------|
|     |                                          |                    |                    |                        | EGPYDVVVVLPGGNLGAQNLSESAAVK         | 140       |
| 638 | heat shock protein 27                    | gi 662841          | 21                 | 3                      | LFDQAFGLPR                          | 60        |
|     |                                          |                    |                    |                        | VSLDVNHFAPELTVK                     | 51        |
|     |                                          |                    |                    |                        | LATQSNEITIPVTFESR                   | 107       |
| 639 | TSA                                      | gi 1617118         | 9                  | 2                      | EGGLGPLNIPLLDVTR                    | 84        |
|     |                                          |                    |                    |                        | KEGGLGPLNIPLLDVTR                   | 106       |
| 640 | Superoxide dismutase [Cu-Zn]             | gi 31615344        | 32                 | 3                      | GDGPVQGIINFEQK                      | 60        |
|     |                                          |                    |                    |                        | DGVADVSIEDSVISLSGDHCIIGR            | 105       |
|     |                                          |                    |                    |                        | HVGDLGNVTADKDGADVSIEDSVISLSGDHCIIGR | 83        |
| 641 | Glyceraldehyde-3-phosphate dehydrogenase | gi 67464043        | 8                  | 2                      | VPTANVSVVDLTCR                      | 88        |
|     |                                          |                    |                    |                        | LISWYDNEFGYSNR                      | 63        |
| 642 | Human Serum Albumin                      | gi 157830361       | 5                  | 2                      | KVPQVSTPTLVEVSR                     | 49        |
|     |                                          |                    |                    |                        | VFDEFKPLVEEPQNLIK                   | 70        |
| 643 | biliverdin-IX beta reductase isozyme I   | gi 544759          | 25                 | 2                      | TVAGQDAVIVLLGTR                     | 86        |
|     |                                          |                    |                    |                        | YVAVMPPHIGDQPLTGAYTVTLDGR           | 67        |

| No. | Protein description       | NCBI accession no. | Sequence coverage% | Matched peptide number | Peptide sequence       | Ion score |
|-----|---------------------------|--------------------|--------------------|------------------------|------------------------|-----------|
| 644 | Triosephosphate isomerase | gi 999892          | 13                 | 2                      | HVFGESDELIGQK          | 85        |
|     |                           |                    |                    |                        | VPADTEVVCAPPTAYIDFAR   | 66        |
| 645 | actin, cytoplasmic 2      | gi 4501887         | 15                 | 4                      | GYSFTTTAER             | 54        |
|     |                           |                    |                    |                        | QEYDESGPSIVHR          | 90        |
|     |                           |                    |                    |                        | SYELPDGQVITIGNER       | 131       |
|     |                           |                    |                    |                        | VAPEEHPVLLTEAPLNPK     | 100       |
| 646 | ALB protein               | gi 23241675        | 12                 | 3                      | KVPQVSTPTLVEVSR        | 59        |
|     |                           |                    |                    |                        | RPCFSALEVDETYVPK       | 41        |
|     |                           |                    |                    |                        | VFDEFKPLVEEPQNLIK      | 56        |
| 647 | hypothetical protein      | gi 51476390        | 9                  | 4                      | YLVEIAR                | 41        |
|     |                           |                    |                    |                        | LVNEVTEFAK             | 51        |
|     |                           |                    |                    |                        | QEPERNECFLQHK          | 58        |
|     |                           |                    |                    |                        | LVRPEVDVMCTAFHDNEETFLK | 39        |
| 648 | hypothetical protein      | gi 51476390        | 4                  | 3                      | YLVEIAR                | 41        |
|     |                           |                    |                    |                        | LVNEVTEFAK             | 49        |
|     |                           |                    |                    |                        | FKDLGEEENFK            | 41        |

| No. | Protein description       | NCBI accession no. | Sequence coverage% | Matched peptide number | Peptide sequence      | Ion score |
|-----|---------------------------|--------------------|--------------------|------------------------|-----------------------|-----------|
| 649 | peroxiredoxin-6           | gi 4758638         | 27                 | 5                      | NFDEILR               | 50        |
|     |                           |                    |                    |                        | LPFPIIDDR             | 81        |
|     |                           |                    |                    |                        | LSILYPATTGR           | 49        |
|     |                           |                    |                    |                        | DFTPVCTTELGR          | 77        |
|     |                           |                    |                    |                        | PGGLLLGDVAPNFEANTTVGR | 158       |
| 650 | hypothetical protein      | gi 31873302        | 10                 | 4                      | YISPDQLADLYK          | 54        |
|     |                           |                    |                    |                        | VVIGMDVAASEFFR        | 75        |
|     |                           |                    |                    |                        | VVIGMDVAASEFFR        | 72        |
|     |                           |                    |                    |                        | AAVPSGASTGIYEALER     | 148       |
| 651 | ALB protein               | gi 23241675        | 22                 | 6                      | FQNALLVR              | 59        |
|     |                           |                    |                    |                        | AVMDDFAAFVEK          | 48        |
|     |                           |                    |                    |                        | KVPQVSTPTLVEVSR       | 65        |
|     |                           |                    |                    |                        | RPCFSALEVDETYVPK      | 76        |
|     |                           |                    |                    |                        | VFDEFKPLVEEPQNLIK     | 78        |
|     |                           |                    |                    |                        | EFNAETFTFHADICTLSEK   | 81        |
| 652 | Triosephosphate isomerase | gi 999892          | 13                 | 2                      | HVFGESDELIGQK         | 90        |



| No. | Protein description          | NCBI accession no. | Sequence coverage% | Matched peptide number | Peptide sequence        | Ion score |
|-----|------------------------------|--------------------|--------------------|------------------------|-------------------------|-----------|
|     |                              |                    |                    |                        | VPADTEVVCAPPTAYIDFAR    | 75        |
| 653 | Apolipoprotein A-I precursor | gi 90108664        | 12                 | 3                      | DEPPQSPWDR              | 57        |
|     |                              |                    |                    |                        | THLAPYSDELK             | 82        |
|     |                              |                    |                    |                        | VSFLSALEEYTK            | 56        |
| 654 | actin, cytoplasmic 2         | gi 4501887         | 13                 | 3                      | QEYDESGPSIVHR           | 86        |
|     |                              |                    |                    |                        | SYELPDGQVITIGNER        | 103       |
|     |                              |                    |                    |                        | VAPEEHPVLLTEAPLNPK      | 90        |
| 655 | hypothetical protein         | gi 51476390        | 7                  | 4                      | YLVEIAR                 | 44        |
|     |                              |                    |                    |                        | LVNEVTEFAK              | 51        |
|     |                              |                    |                    |                        | FKDLGEEFK               | 39        |
|     |                              |                    |                    |                        | QEPERNECFLQHK           | 41        |
| 656 | unnamed protein product      | gi 194389712       | 11                 | 3                      | GPEEEHPSVTLFR           | 84        |
|     |                              |                    |                    |                        | TVQPKPDYGAAVAFFEETAR    | 129       |
|     |                              |                    |                    |                        | AGFALDEGIANPTDAFTVFYSER | 128       |
| 657 | unnamed protein product      | gi 16552261        | 9                  | 3                      | EEAENTLQSFR             | 51        |
|     |                              |                    |                    |                        | TNEKVELQELNDR           | 53        |

| No. | Protein description      | NCBI accession no. | Sequence coverage% | Matched peptide number | Peptide sequence    | Ion score |
|-----|--------------------------|--------------------|--------------------|------------------------|---------------------|-----------|
|     |                          |                    |                    |                        | EMEENFAVEAANYQDTIGR | 98        |
| 658 | unnamed protein product  | gi 21757082        | 12                 | 3                      | EPQVYTLPPSR         | 59        |
|     |                          |                    |                    |                        | EPQVYTLPPSRDELTK    | 52        |
|     |                          |                    |                    |                        | TPEVTCVVVDVSHEDPEVK | 101       |
| 659 | unnamed protein product  | gi 21757082        | 8                  | 2                      | EPQVYTLPPSR         | 59        |
|     |                          |                    |                    |                        | TPEVTCVVVDVSHEDPEVK | 56        |
| 660 | ALB protein              | gi 23241675        | 22                 | 6                      | FQNALLVR            | 61        |
|     |                          |                    |                    |                        | AVMDDFAAFVEK        | 69        |
|     |                          |                    |                    |                        | KVPQVSTPTLVEVSR     | 78        |
|     |                          |                    |                    |                        | RPCFSALEVDETYVPK    | 89        |
|     |                          |                    |                    |                        | VFDEFKPLVEEPQNLIK   | 87        |
|     |                          |                    |                    |                        | EFNAETTFHADICTLSEK  | 64        |
| 661 | aldehyde dehydrogenase 1 | gi 2183299         | 10                 | 4                      | QAFQIGSPWR          | 46        |
|     |                          |                    |                    |                        | TIPIDGNFFTYTR       | 101       |
|     |                          |                    |                    |                        | IFVEESIYDEFVR       | 90        |
|     |                          |                    |                    |                        | ELGEYGFHEYTEVK      | 43        |

| No. | Protein description                      | NCBI accession no. | Sequence coverage% | Matched peptide number | Peptide sequence         | Ion score |
|-----|------------------------------------------|--------------------|--------------------|------------------------|--------------------------|-----------|
| 662 | Protein disulfide-isomerase A3 precursor | gi 220702506       | 15                 | 5                      | ELSDFISYLQR              | 54        |
|     |                                          |                    |                    |                        | DLLIAYYDVDYEK            | 53        |
|     |                                          |                    |                    |                        | SDVLELTDDNFESR           | 64        |
|     |                                          |                    |                    |                        | MDATANDVSPYEVR           | 53        |
|     |                                          |                    |                    |                        | TFSHELSDFGLESTAGEIPVVAIR | 130       |
| 663 | phosphoglycerate kinase 1                | gi 4505763         | 16                 | 4                      | LGDVYVNDAFGTAHR          | 100       |
|     |                                          |                    |                    |                        | ALESPERPFLAILGGAK        | 61        |
|     |                                          |                    |                    |                        | VLNNMEIGTSLFDEEGAK       | 65        |
|     |                                          |                    |                    |                        | ITLPVDFVTADKFDENAK       | 65        |
| 664 | Tubulin, beta 2C                         | gi 23958133        | 10                 | 3                      | FPGQLNADLR               | 93        |
|     |                                          |                    |                    |                        | AVLVDLEPGTMDSVR          | 41        |
|     |                                          |                    |                    |                        | GHYTEGAELVDSVLDVVR       | 170       |
| 665 | Glyceraldehyde-3-phosphate dehydrogenase | gi 67464043        | 8                  | 2                      | VPTANVSVVDTLTCR          | 128       |
|     |                                          |                    |                    |                        | LISWYDNEFGYSNR           | 94        |
| 666 | actin, cytoplasmic 2                     | gi 4501887         | 18                 | 5                      | AGFAGDDAPR               | 68        |

| No. | Protein description     | NCBI accession no. | Sequence coverage% | Matched peptide number | Peptide sequence         | Ion score |
|-----|-------------------------|--------------------|--------------------|------------------------|--------------------------|-----------|
|     |                         |                    |                    |                        | GYSFTTTAER               | 51        |
|     |                         |                    |                    |                        | QEYDESGPSIVHR            | 111       |
|     |                         |                    |                    |                        | SYELPDGQVITIGNER         | 154       |
|     |                         |                    |                    |                        | VAPEEHPVLLTEAPLNPK       | 89        |
| 667 | HSP70-1                 | gi 4529893         | 6                  | 2                      | AQIHDLVLVGGSTR           | 82        |
|     |                         |                    |                    |                        | QTQIFTTYSDNQPGVLIQVYEGER | 126       |
| 668 | Human Serum Albumin     | gi 157830361       | 14                 | 6                      | FQNALLVR                 | 42        |
|     |                         |                    |                    |                        | AVMDDFAAFVEK             | 48        |
|     |                         |                    |                    |                        | KVPQVSTPTLVEVSR          | 37        |
|     |                         |                    |                    |                        | RPCFSALEVDETYVPK         | 58        |
|     |                         |                    |                    |                        | VFDEFKPLVEEPQNLIK        | 88        |
|     |                         |                    |                    |                        | EFNAETTFHADICTLSEK       | 101       |
| 669 | hypothetical protein    | gi 31873302        | 10                 | 3                      | YISPDQLADLYK             | 52        |
|     |                         |                    |                    |                        | VVIGMDVAASEFFR           | 53        |
|     |                         |                    |                    |                        | AAVPSGASTGIYEALRLR       | 128       |
| 670 | unnamed protein product | gi 21757082        | 11                 | 3                      | EPQVYTLPPSR              | 56        |

| No. | Protein description              | NCBI accession no. | Sequence coverage% | Matched peptide number | Peptide sequence       | Ion score |
|-----|----------------------------------|--------------------|--------------------|------------------------|------------------------|-----------|
|     |                                  |                    |                    |                        | FNWYVDGVEVHNAK         | 48        |
|     |                                  |                    |                    |                        | TPEVTCVVVDVSHEDPEVK    | 57        |
| 671 | aldehyde dehydrogenase 1A1       | gi 21361176        | 5                  | 2                      | TIPIDGNFFTYTR          | 54        |
|     |                                  |                    |                    |                        | IFVEESYDEFVR           | 75        |
| 672 | PGK1                             | gi 48145549        | 16                 | 4                      | LGDVYVNDAFGTAHR        | 111       |
|     |                                  |                    |                    |                        | ALESPERFLAILGGAK       | 45        |
|     |                                  |                    |                    |                        | VLNNMEIGTSLFDEEGAK     | 74        |
|     |                                  |                    |                    |                        | ITLPVDFVTADKFDENAK     | 77        |
| 673 | fructose-bisphosphate aldolase A | gi 4557305         | 16                 | 3                      | FSHEEIAMATVTALR        | 66        |
|     |                                  |                    |                    |                        | IGEHTPSALAIMENANVLAR   | 49        |
|     |                                  |                    |                    |                        | YTPSGQAGAAASESLFVSNHAY | 81        |
| 674 | Chain A, Aldehyde Reductase      | gi 157834561       | 9                  | 2                      | DAGHPLYPFNDPY          | 41        |
|     |                                  |                    |                    |                        | GLEVTAYSPLGSSDR        | 101       |
| 675 | ALB protein                      | gi 23241675        | 18                 | 5                      | FQNALLVR               | 62        |
|     |                                  |                    |                    |                        | AVMDDFAAFVEK           | 70        |
|     |                                  |                    |                    |                        | RPCFSALEVDETYVPK       | 92        |

| No. | Protein description                                 | NCBI accession no. | Sequence coverage% | Matched peptide number | Peptide sequence          | Ion score |
|-----|-----------------------------------------------------|--------------------|--------------------|------------------------|---------------------------|-----------|
|     |                                                     |                    |                    |                        | VFDEFKPLVEEPQNLIK         | 115       |
|     |                                                     |                    |                    |                        | EFNAETFTFHADICTLSEK       | 116       |
| 676 | ALB protein                                         | gi 23241675        | 17                 | 5                      | FQNALLVR                  | 48        |
|     |                                                     |                    |                    |                        | AVMDDFAAFVEK              | 38        |
|     |                                                     |                    |                    |                        | KVPQVSTPTLVEVSR           | 86        |
|     |                                                     |                    |                    |                        | RPCFSALEVDETYVPK          | 67        |
|     |                                                     |                    |                    |                        | VFDEFKPLVEEPQNLIK         | 52        |
| 677 | aldehyde dehydrogenase 1                            | gi 2183299         | 5                  | 2                      | TIPIDGNFFTYTR             | 77        |
|     |                                                     |                    |                    |                        | IFVEESIYDEFVR             | 103       |
| 678 | Human Muscle Pyruvate Kinase                        | gi 67464392        | 7                  | 2                      | FGVEQDVMVFASFIR           | 40        |
|     |                                                     |                    |                    |                        | TATESFASDPILYRPVAVALDTK   | 63        |
| 679 | N(G),N(G)-dimethylarginine dimethylaminohydrolase 1 | gi 134104755       | 13                 | 3                      | ALPESLGQHALR              | 95        |
|     |                                                     |                    |                    |                        | DENATLDGGDVLFTGR          | 62        |
|     |                                                     |                    |                    |                        | LQLNIVEMKDENATLDGGDVLFTGR | 116       |
| 680 | hypothetical protein                                | gi 31873302        | 10                 | 4                      | YISPDQLADLYK              | 63        |

| No. | Protein description                      | NCBI accession no. | Sequence coverage% | Matched peptide number | Peptide sequence   | Ion score |
|-----|------------------------------------------|--------------------|--------------------|------------------------|--------------------|-----------|
|     |                                          |                    |                    |                        | VVIGMDVAASEFFR     | 52        |
|     |                                          |                    |                    |                        | VVIGMDVAASEFFR     | 65        |
|     |                                          |                    |                    |                        | AAVPSGASTGIYEALER  | 146       |
| 681 | phosphoglycerate kinase 1                | gi 4505763         | 12                 | 3                      | LGDVYVNDAFGTAHR    | 122       |
|     |                                          |                    |                    |                        | ALESPERFLAILGGAK   | 56        |
|     |                                          |                    |                    |                        | VLNNMEIGTSLFDEEGAK | 69        |
| 682 | Glyceraldehyde-3-phosphate dehydrogenase | gi 67464043        | 8                  | 2                      | VPTANVSVDLTCR      | 45        |
|     |                                          |                    |                    |                        | LISWYDNEFGYSNR     | 66        |
| 683 | Glyceraldehyde-3-phosphate dehydrogenase | gi 67464043        | 13                 | 3                      | VPTANVSVDLTCR      | 120       |
|     |                                          |                    |                    |                        | LVINGNPITIFQR      | 99        |
|     |                                          |                    |                    |                        | LISWYDNEFGYSNR     | 137       |
| 684 | albumin, isoform CRA_t                   | gi 119626083       | 7                  | 3                      | FQNALLVR           | 46        |
|     |                                          |                    |                    |                        | KVPQVSTPTLVEVSR    | 70        |
|     |                                          |                    |                    |                        | VFDEFKPLVEEPQNLIK  | 70        |

| No. | Protein description                             | NCBI accession no. | Sequence coverage% | Matched peptide number | Peptide sequence         | Ion score |
|-----|-------------------------------------------------|--------------------|--------------------|------------------------|--------------------------|-----------|
| 685 | Protein disulfide-isomerase A3 precursor        | gi 220702506       | 15                 | 5                      | ELSDFISYLQR              | 41        |
|     |                                                 |                    |                    |                        | DLLIAYYDVDYEK            | 38        |
|     |                                                 |                    |                    |                        | SDVLELTDDNFESR           | 76        |
|     |                                                 |                    |                    |                        | MDATANDVSPYEVR           | 51        |
|     |                                                 |                    |                    |                        | TFSHELSDFGLESTAGEIPVVAIR | 136       |
| 686 | unnamed protein product                         | gi 37403           | 9                  | 3                      | IQLVEEELDR               | 52        |
|     |                                                 |                    |                    |                        | IQLVQQQADDAEER           | 65        |
|     |                                                 |                    |                    |                        | KIQLVQQQADDAEER          | 73        |
| 687 | 6-phosphogluconolactonase                       | gi 6912586         | 18                 | 3                      | ELPAAVAPAGPASLAR         | 59        |
|     |                                                 |                    |                    |                        | IVAPISDSPKPPPQR          | 41        |
|     |                                                 |                    |                    |                        | LVPFDHAESTYGLYR          | 79        |
| 688 | endoplasmic reticulum protein 29, isoform CRA_b | gi 119618398       | 10                 | 2                      | ESYPVFYLFER              | 52        |
|     |                                                 |                    |                    |                        | ILDQGEDFPASEMTR          | 48        |
| 689 | heat shock protein 27                           | gi 662841          | 25                 | 4                      | QDEHGYISR                | 41        |
|     |                                                 |                    |                    |                        | LFDQAFGLPR               | 98        |



| No. | Protein description                      | NCBI accession no. | Sequence coverage% | Matched peptide number | Peptide sequence      | Ion score |
|-----|------------------------------------------|--------------------|--------------------|------------------------|-----------------------|-----------|
|     |                                          |                    |                    |                        | VSLDVNHFADELTVK       | 93        |
|     |                                          |                    |                    |                        | LATQSNEITIPVTFESR     | 131       |
| 690 | Human Serum Albumin                      | gi 157830361       | 9                  | 4                      | YLYEIAR               | 40        |
|     |                                          |                    |                    |                        | KVPQVSTPTLVEVSR       | 56        |
|     |                                          |                    |                    |                        | RPCFSALEVDETYVPK      | 50        |
|     |                                          |                    |                    |                        | VFDEFKPLVEEPQNLIK     | 57        |
| 691 | aldehyde dehydrogenase 1                 | gi 2183299         | 10                 | 4                      | QAFQIGSPWR            | 43        |
|     |                                          |                    |                    |                        | TIPIDGNFFTYTR         | 96        |
|     |                                          |                    |                    |                        | IFVEESIYDEFVR         | 122       |
|     |                                          |                    |                    |                        | ELGEYGFHEYTEVK        | 40        |
| 692 | carbonyl reductase 3 variant             | gi 62898419        | 15                 | 3                      | AFENCSEDLQER          | 37        |
|     |                                          |                    |                    |                        | FHQLDIDDLQSIR         | 60        |
|     |                                          |                    |                    |                        | GQAAVQQLQAEGLSPR      | 82        |
| 693 | Protein disulfide-isomerase A3 precursor | gi 220702506       | 10                 | 3                      | DLIIAYYVDVYEK         | 43        |
|     |                                          |                    |                    |                        | SDVLELTDDNFESR        | 71        |
|     |                                          |                    |                    |                        | DASIVGFFDDSFSEAHSEFLK | 63        |

| No. | Protein description                      | NCBI accession no. | Sequence coverage% | Matched peptide number | Peptide sequence  | Ion score |
|-----|------------------------------------------|--------------------|--------------------|------------------------|-------------------|-----------|
| 694 | Alpha-1-antitrypsin precursor            | gi 28948408        | 12                 | 3                      | TDTSHHDQDHPTFNK   | 84        |
|     |                                          |                    |                    |                        | DTEEDFHVDQVTTVK   | 93        |
|     |                                          |                    |                    |                        | LYHSEAFVNFQDTEEAK | 47        |
| 695 | aldehyde dehydrogenase 1A1               | gi 21361176        | 5                  | 2                      | TIPIDGNFFTYTR     | 66        |
|     |                                          |                    |                    |                        | IFVEESIYDEFVR     | 61        |
| 696 | Glyceraldehyde-3-phosphate dehydrogenase | gi 67464043        | 8                  | 2                      | LVINGNPITIFQER    | 74        |
|     |                                          |                    |                    |                        | LISWYDNEFGYSNR    | 67        |
| 697 | Glyceraldehyde-3-phosphate dehydrogenase | gi 67464043        | 13                 | 3                      | VPTANVSVVDTLTCR   | 79        |
|     |                                          |                    |                    |                        | LVINGNPITIFQER    | 61        |
|     |                                          |                    |                    |                        | LISWYDNEFGYSNR    | 98        |
| 698 | Human Serum Albumin                      | gi 157830361       | 14                 | 6                      | FQNALLVR          | 45        |
|     |                                          |                    |                    |                        | HPDYSVLLLR        | 67        |
|     |                                          |                    |                    |                        | KVPQVSTPTLVEVSR   | 51        |
|     |                                          |                    |                    |                        | RPCFSALEVDETYVPK  | 64        |

| No. | Protein description                          | NCBI accession no. | Sequence coverage% | Matched peptide number | Peptide sequence         | Ion score |
|-----|----------------------------------------------|--------------------|--------------------|------------------------|--------------------------|-----------|
|     |                                              |                    |                    |                        | VFDEFKPLVEEPQNLIK        | 101       |
|     |                                              |                    |                    |                        | EFNAETFTFHADICTLSEK      | 63        |
| 699 | unnamed protein product                      | gi 16552261        | 14                 | 4                      | ISLPLPNFSSLNLR           | 46        |
|     |                                              |                    |                    |                        | TNEKVELQELNDR            | 40        |
|     |                                              |                    |                    |                        | EMEENFAVEAANYQDTIGR      | 103       |
|     |                                              |                    |                    |                        | QVQSLTCEVDALKGTNESLER    | 66        |
| 700 | galactokinase 1                              | gi 119609722       | 16                 | 5                      | LQFPLPTAQR               | 49        |
|     |                                              |                    |                    |                        | EVQLEEEAAR               | 42        |
|     |                                              |                    |                    |                        | QPQVAELLAEAR             | 48        |
|     |                                              |                    |                    |                        | EEFGAEP ELAVSAPGR        | 63        |
|     |                                              |                    |                    |                        | KDGLVSLTTSEGADEPQR       | 88        |
| 701 | heat shock 70kDa protein 8 isoform 1 variant | gi 62897129        | 6                  | 3                      | FEELNADLFR               | 54        |
|     |                                              |                    |                    |                        | ARFEELNADLFR             | 47        |
|     |                                              |                    |                    |                        | QTQTFTTYSDNQPGVLIQVYEGER | 153       |
| 702 | actin, gamma-enteric smooth muscle           | gi 4501889         | 12                 | 3                      | GYSFVTTAER               | 43        |

| No. | Protein description                               | NCBI accession no. | Sequence coverage% | Matched peptide number | Peptide sequence    | Ion score |
|-----|---------------------------------------------------|--------------------|--------------------|------------------------|---------------------|-----------|
|     | propeptide                                        |                    |                    |                        |                     |           |
|     |                                                   |                    |                    |                        | SYELPDGQVITIGNER    | 145       |
|     |                                                   |                    |                    |                        | VAPEEHPTLLTEAPLNPK  | 49        |
| 703 | prepro-alpha2(I) collagen                         | gi 1418930         | 2                  | 2                      | GEAGAAGPAGPAGPR     | 52        |
|     |                                                   |                    |                    |                        | GETGPSGPVGPAGAVGPR  | 131       |
| 704 | trifunctional enzyme subunit alpha, mitochondrial | gi 20127408        | 4                  | 2                      | ADMVIEAVFEDLSLK     | 40        |
|     |                                                   |                    |                    |                        | DSIFSNLTGQLDYQGF EK | 65        |
| 705 | collagen, type VI, alpha 3, isoform CRA_f         | gi 119591514       | 2                  | 3                      | VNHFVPEAGSR         | 50        |
|     |                                                   |                    |                    |                        | SVEDAQDVSLALTQR     | 86        |
|     |                                                   |                    |                    |                        | VVIHFTDGADGDLADLHR  | 53        |
| 706 | protein disulfide isomerase-related protein 5     | gi 1710248         | 7                  | 2                      | TGEAIVDAALSALR      | 91        |
|     |                                                   |                    |                    |                        | LYSSDDVIELTPSNFNR   | 90        |
| 707 | heat shock protein 27                             | gi 662841          | 13                 | 2                      | LFDQAFGLPR          | 91        |
|     |                                                   |                    |                    |                        | LATQSNEITIPVTFESR   | 91        |

| No. | Protein description                  | NCBI accession no. | Sequence coverage% | Matched peptide number | Peptide sequence      | Ion score |
|-----|--------------------------------------|--------------------|--------------------|------------------------|-----------------------|-----------|
| 708 | collagen, type VI, alpha 1 precursor | gi 87196339        | 2                  | 2                      | DQLLPPSPNNR           | 43        |
|     |                                      |                    |                    |                        | VFSVAITPDHLEPR        | 59        |
| 709 | albumin preproprotein                | gi 4502027         | 6                  | 3                      | FQNALLVR              | 54        |
|     |                                      |                    |                    |                        | DVFLGMFLYEYAR         | 74        |
|     |                                      |                    |                    |                        | KVPQVSTPTLVEVSR       | 55        |
| 710 | phosphoglycerate kinase 1            | gi 4505763         | 12                 | 3                      | LGDVYVNDAFGTAHR       | 75        |
|     |                                      |                    |                    |                        | ALESPERPFLAILGGAK     | 52        |
|     |                                      |                    |                    |                        | ITLPVDFVTADKFDENAK    | 41        |
| 711 | Tubulin, beta 2C                     | gi 23958133        | 6                  | 2                      | FPGQLNADLR            | 61        |
|     |                                      |                    |                    |                        | GHYTEGAELVDSVLDVVR    | 78        |
| 712 | hypothetical protein                 | gi 31873270        | 6                  | 2                      | LTGFHETSNINDFSAGVANR  | 79        |
|     |                                      |                    |                    |                        | RLTGFHETSNINDFSAGVANR | 37        |
| 713 | phosphoglycerate kinase 1            | gi 4505763         | 8                  | 2                      | LGDVYVNDAFGTAHR       | 77        |
|     |                                      |                    |                    |                        | ALESPERPFLAILGGAK     | 53        |
| 714 | heat shock protein 27                | gi 662841          | 13                 | 2                      | LFDQAFGLPR            | 66        |
|     |                                      |                    |                    |                        | LATQSNEITIPVTFESR     | 71        |

| No. | Protein description           | NCBI accession no. | Sequence coverage% | Matched peptide number | Peptide sequence   | Ion score |
|-----|-------------------------------|--------------------|--------------------|------------------------|--------------------|-----------|
| 715 | lamin A/C isoform 1 precursor | gi 27436946        | 7                  | 4                      | NIYSEELR           | 39        |
|     |                               |                    |                    |                        | TLEGELHDLR         | 56        |
|     |                               |                    |                    |                        | LQEKEDLQELNDR      | 73        |
|     |                               |                    |                    |                        | NSNLVGAAHEELQQSR   | 103       |
| 716 | hypothetical protein          | gi 11276938        | 4                  | 4                      | IGFPWSEIR          | 45        |
|     |                               |                    |                    |                        | IQVWHAHR           | 48        |
|     |                               |                    |                    |                        | APDFVYAPR          | 71        |
|     |                               |                    |                    |                        | KAPDFVYAPR         | 70        |
| 717 | unknown                       | gi 62988748        | 2                  | 4                      | VNHFVPEAGSR        | 40        |
|     |                               |                    |                    |                        | SVEDAQDVSLALTQR    | 103       |
|     |                               |                    |                    |                        | VAVVTYNNEVTTEIR    | 67        |
|     |                               |                    |                    |                        | VVIHFTDGADGDLADLHR | 60        |
| 718 | peroxiredoxin-2 isoform a     | gi 32189392        | 15                 | 3                      | QITVNDLPVGR        | 46        |
|     |                               |                    |                    |                        | EGGLGPLNIPLLADVTR  | 80        |
|     |                               |                    |                    |                        | KEGGLGPLNIPLLADVTR | 53        |
| 719 | Unknown                       | gi 15679996        | 13                 | 2                      | FQNALLVR           | 40        |

| No. | Protein description                          | NCBI accession no. | Sequence coverage% | Matched peptide number | Peptide sequence      | Ion score |
|-----|----------------------------------------------|--------------------|--------------------|------------------------|-----------------------|-----------|
|     |                                              |                    |                    |                        | KVPQVSTPTLVEVSR       | 39        |
| 720 | smooth muscle myosin heavy chain             | gi 4417214         | 6                  | 4                      | IAQLEEQVEQEAR         | 59        |
|     |                                              |                    |                    |                        | LQQELDDLVDLDNQR       | 112       |
|     |                                              |                    |                    |                        | ELEGHISDLQEDLDSER     | 58        |
|     |                                              |                    |                    |                        | DVASLSSQLQDTQELLQEETR | 99        |
| 721 | peptidylprolyl isomerase A                   | gi 10863927        | 30                 | 4                      | VSFELFADK             | 48        |
|     |                                              |                    |                    |                        | FEDENFILK             | 42        |
|     |                                              |                    |                    |                        | IIPGFMCQGGDFTR        | 48        |
|     |                                              |                    |                    |                        | VNPTVFFDIAVDGEPLGR    | 153       |
| 722 | apolipoprotein A-I preproprotein             | gi 4557321         | 10                 | 2                      | THLAPYSDELK           | 60        |
|     |                                              |                    |                    |                        | EQLGPVTQEFWDNLEK      | 80        |
| 723 | Hemoglobin subunit delta                     | gi 56553723        | 20                 | 2                      | LLVVYPWTQR            | 63        |
|     |                                              |                    |                    |                        | FFESFGDLSTPDAVMGNPK   | 127       |
| 724 | medium-chain specific acyl-CoA dehydrogenase | gi 4557231         | 7                  | 2                      | IYQIYEGTSQIQR         | 72        |
|     |                                              |                    |                    |                        | AFTGFIVEADTPGIQIGR    | 74        |

| No. | Protein description                            | NCBI accession no. | Sequence coverage% | Matched peptide number | Peptide sequence      | Ion score |
|-----|------------------------------------------------|--------------------|--------------------|------------------------|-----------------------|-----------|
| 725 | alpha 2 type VI collagen isoform 2C2 precursor | gi 115527062       | 4                  | 2                      | YGGLHFSDQVEVFSPPGSDR  | 93        |
|     |                                                |                    |                    |                        | NDYATMLPDSTEIDQDTINR  | 62        |
| 726 | HSPA9 protein                                  | gi 21040386        | 4                  | 2                      | AQFEGIVTDLIR          | 54        |
|     |                                                |                    |                    |                        | LLGQFTLIGIPPAPR       | 37        |
| 727 | outer dense fiber protein 2/2                  | gi 2996006         | 6                  | 4                      | NIDLTAIISDLR          | 53        |
|     |                                                |                    |                    |                        | KNIDLTAIISDLR         | 56        |
|     |                                                |                    |                    |                        | LAECQDQLQGYER         | 43        |
|     |                                                |                    |                    |                        | QTAEYSAFKLENER        | 78        |
| 728 | ubiquitin and ribosomal protein S27a precursor | gi 4506713         | 19                 | 2                      | IQDKEGIPPDQQR         | 59        |
|     |                                                |                    |                    |                        | TITLEVEPSDTIENVK      | 44        |
| 729 | hypothetical protein                           | gi 31873270        | 6                  | 2                      | LTGFHETSNINDFSAGVANR  | 151       |
|     |                                                |                    |                    |                        | RLTGFHETSNINDFSAGVANR | 90        |
| 730 | aldehyde dehydrogenase 1                       | gi 2183299         | 5                  | 2                      | QAFQIGSPWR            | 64        |
|     |                                                |                    |                    |                        | IAKEEIFGPVQQIMK       | 53        |



| No. | Protein description                       | NCBI accession no. | Sequence coverage% | Matched peptide number | Peptide sequence              | Ion score |
|-----|-------------------------------------------|--------------------|--------------------|------------------------|-------------------------------|-----------|
| 731 | methylmalonate semialdehyde dehydrogenase | gi 188696          | 9                  | 2                      | AISFVGSNKAGEYIFER             | 188       |
|     |                                           |                    |                    |                        | NHGVMVPDANKENTLNQLVGAAFGAAGQR | 125       |
| 732 | Peptidyl-prolyl cis-trans isomerase A     | gi 2981743         | 14                 | 2                      | FEDENFILK                     | 41        |
|     |                                           |                    |                    |                        | IIPGFXCQGGDFTR                | 60        |
| 733 | nucleoside diphosphate kinase B           | gi 4505409         | 26                 | 3                      | DRPFFPGLVK                    | 49        |
|     |                                           |                    |                    |                        | TFIAIKPDGVQR                  | 55        |
|     |                                           |                    |                    |                        | VMLGETNPADSKPGTIR             | 38        |
| 734 | Nm23 protein                              | gi 35068           | 19                 | 2                      | TFIAIKPDGVQR                  | 108       |
|     |                                           |                    |                    |                        | VMLGETNPADSKPGTIR             | 46        |
| 735 | peroxiredoxin 1                           | gi 55959887        | 15                 | 2                      | GLFIIDDKGILR                  | 61        |
|     |                                           |                    |                    |                        | TIAQDYGVLKADEGISFR            | 105       |
| 736 | Peptidyl-prolyl cis-trans isomerase A     | gi 1633054         | 18                 | 3                      | IIPGFMCQGGDFTR                | 64        |
|     |                                           |                    |                    |                        | IIPGFMCQGGDFTR                | 51        |
|     |                                           |                    |                    |                        | SIYGEKFEDENFILK               | 62        |
| 737 | unnamed protein product                   | gi 189054552       | 7                  | 3                      | FQNALLVR                      | 57        |

| No. | Protein description                      | NCBI accession no. | Sequence coverage% | Matched peptide number | Peptide sequence     | Ion score |
|-----|------------------------------------------|--------------------|--------------------|------------------------|----------------------|-----------|
|     |                                          |                    |                    |                        | KVPQVSTPTLVEVSR      | 59        |
|     |                                          |                    |                    |                        | VHTECCHGDLLECADDR    | 65        |
| 738 | Unknown                                  | gi 15679996        | 11                 | 2                      | FQNALLVR             | 56        |
|     |                                          |                    |                    |                        | KVPQVSTPTLVEVSR      | 68        |
| 739 | hypothetical protein                     | gi 51476390        | 4                  | 2                      | FQNALLVR             | 41        |
|     |                                          |                    |                    |                        | KVPQVSTPTLVEVSR      | 66        |
| 740 | PGK1                                     | gi 48145549        | 16                 | 4                      | LGDVVYVNDAFGTAHR     | 117       |
|     |                                          |                    |                    |                        | ALESPERPFLAILGGAK    | 66        |
|     |                                          |                    |                    |                        | VLNNMEIGTSLFDEEGAK   | 100       |
|     |                                          |                    |                    |                        | ITLPVDFVTADKFDENAK   | 57        |
| 741 | Valosin-containing protein               | gi 111305821       | 5                  | 2                      | LIVDEAINEDNSVVLSQPK  | 84        |
|     |                                          |                    |                    |                        | EDEEESLNEVGYYDDIGGCR | 87        |
| 742 | hypothetical protein                     | gi 51476390        | 4                  | 2                      | LVNEVTEFAK           | 42        |
|     |                                          |                    |                    |                        | QEPERNECFLQHK        | 54        |
| 743 | Glyceraldehyde-3-phosphate dehydrogenase | gi 67464043        | 16                 | 3                      | VPTANVSVVDLTCR       | 123       |

| No. | Protein description                                   | NCBI accession no. | Sequence coverage% | Matched peptide number | Peptide sequence         | Ion score |
|-----|-------------------------------------------------------|--------------------|--------------------|------------------------|--------------------------|-----------|
|     |                                                       |                    |                    |                        | LISWYDNEFGYSNR           | 102       |
|     |                                                       |                    |                    |                        | VIHDNFGIVEGLMTTVHAITATQK | 47        |
| 744 | aldehyde dehydrogenase 1A1                            | gi 21361176        | 5                  | 2                      | TIPIDGNFFTYTR            | 57        |
|     |                                                       |                    |                    |                        | IFVEESYDEFVR             | 67        |
| 745 | chaperonin containing TCP1, subunit 2 (beta), isoform | gi 119617636       | 8                  | 2                      | QVLLSAAEAAEVILR          | 58        |
|     |                                                       |                    |                    |                        | VQDDEVGDGTTSVTVLAAELLR   | 181       |
| 746 | neuropolypeptide h3                                   | gi 913159          | 18                 | 2                      | LYTLVLTPDAPSR            | 65        |
|     |                                                       |                    |                    |                        | GNDISSGTVLSDYVGSPPK      | 39        |
| 747 | Transferrin                                           | gi 37747855        | 4                  | 2                      | EGYYGYTGAFR              | 93        |
|     |                                                       |                    |                    |                        | ADRDQYELLCLDNTR          | 82        |
| 748 | Glutathione S-transferase P                           | gi 23200510        | 10                 | 2                      | PPYTVVYFPVR              | 75        |
|     |                                                       |                    |                    |                        | ALPGQLKPFETLLSQNGGK      | 81        |
| 749 | Protein disulfide-isomerase A3 precursor              | gi 220702506       | 15                 | 5                      | FLQDYFDGNLK              | 41        |
|     |                                                       |                    |                    |                        | ELSDFISYLQR              | 86        |
|     |                                                       |                    |                    |                        | SDVLELTDDNFESR           | 66        |

| No. | Protein description                                  | NCBI accession no. | Sequence coverage% | Matched peptide number | Peptide sequence          | Ion score |
|-----|------------------------------------------------------|--------------------|--------------------|------------------------|---------------------------|-----------|
|     |                                                      |                    |                    |                        | MDATANDVSPYEVR            | 66        |
|     |                                                      |                    |                    |                        | TFSHELSDFGLESTAGEIPVVAIR  | 253       |
| 750 | albumin preproprotein                                | gi 4502027         | 3                  | 3                      | FQNALLVR                  | 42        |
|     |                                                      |                    |                    |                        | DVFLGMFLYEYAR             | 84        |
|     |                                                      |                    |                    |                        | DVFLGMFLYEYAR             | 38        |
| 751 | sorbitol dehydrogenase                               | gi 1583520         | 9                  | 2                      | LENYPIPEPGPNEVLLR         | 91        |
|     |                                                      |                    |                    |                        | LPDNVTFEEGALIEPLSVGIHACR  | 61        |
| 752 | Glyceraldehyde-3-phosphate dehydrogenase             | gi 67464043        | 8                  | 2                      | VPTANVSVVDLTCR            | 75        |
|     |                                                      |                    |                    |                        | LISWYDNEFGYSNR            | 76        |
| 753 | tubulin beta-2C chain                                | gi 5174735         | 6                  | 2                      | FPGQLNADLR                | 51        |
|     |                                                      |                    |                    |                        | GHYTEGAELVDSVLDVVR        | 84        |
| 754 | Proteasome (prosome, macropain) subunit, alpha type, | gi 13543551        | 15                 | 2                      | NQYDNDVTWVSPQGR           | 60        |
|     |                                                      |                    |                    |                        | DLEFTIYDDDDVSPFLEGLEERPQR | 99        |
| 755 | biliverdin-IX beta reductase isozyme I               | gi 544759          | 20                 | 2                      | TVAGQDAVIVLLGTR           | 90        |

| No. | Protein description                                 | NCBI accession no. | Sequence coverage% | Matched peptide number | Peptide sequence           | Ion score |
|-----|-----------------------------------------------------|--------------------|--------------------|------------------------|----------------------------|-----------|
|     |                                                     |                    |                    |                        | YVAVMPPHIGDQPLTGAYTVTL DGR | 57        |
| 756 | Glyceraldehyde-3-phosphate dehydrogenase            | gi 67464043        | 8                  | 2                      | VPTANVSVDLTCR              | 59        |
|     |                                                     |                    |                    |                        | LISWYDNEFGYSNR             | 53        |
| 757 | Chain A, Human Guanidinoacetate N-Methyltransferase | gi 71042532        | 14                 | 2                      | TEVMALVPPADCR              | 54        |
|     |                                                     |                    |                    |                        | VQEAPIDEHWIIECNDGVFQR      | 62        |
| 758 | catechol-O-methyltransferase                        | gi 179955          | 14                 | 3                      | YLPDTLLLEECGLLR            | 87        |
|     |                                                     |                    |                    |                        | GTVLLADNVICPGAPDFLAHVR     | 101       |
|     |                                                     |                    |                    |                        | KGTVLLADNVICPGAPDFLAHVR    | 124       |
| 759 | Nitrilase family, member 2                          | gi 18088311        | 9                  | 2                      | FAELAQIYAQR                | 75        |
|     |                                                     |                    |                    |                        | AVDNQVYVATASPAR            | 113       |
| 760 | Glyceraldehyde-3-phosphate dehydrogenase            | gi 67464043        | 8                  | 2                      | VPTANVSVDLTCR              | 39        |
|     |                                                     |                    |                    |                        | LISWYDNEFGYSNR             | 55        |
| 761 | Glyceraldehyde-3-phosphate                          | gi 67464043        | 8                  | 2                      | VPTANVSVDLTCR              | 66        |

| No. | Protein description                         | NCBI accession no. | Sequence coverage% | Matched peptide number | Peptide sequence     | Ion score |
|-----|---------------------------------------------|--------------------|--------------------|------------------------|----------------------|-----------|
|     | dehydrogenase                               |                    |                    |                        |                      |           |
|     |                                             |                    |                    |                        | LISWYDNEFGYSNR       | 72        |
| 762 | PGAM1                                       | gi 49456447        | 16                 | 3                      | VLIAAHGNSLR          | 39        |
|     |                                             |                    |                    |                        | HGESAWNLENR          | 51        |
|     |                                             |                    |                    |                        | NLKPIKPMQFLGDEETVR   | 56        |
| 763 | peroxiredoxin-6                             | gi 4758638         | 13                 | 3                      | NFDEILR              | 48        |
|     |                                             |                    |                    |                        | LSILYPATTGR          | 82        |
|     |                                             |                    |                    |                        | DFTPVCTTELGR         | 77        |
| 764 | Carbonic anhydrase 2                        | gi 157830746       | 17                 | 3                      | SADFTNFDPR           | 49        |
|     |                                             |                    |                    |                        | AVQQPDGLAVLGIFLK     | 56        |
|     |                                             |                    |                    |                        | YDPSLKPLSVSYDQATSLR  | 133       |
| 765 | heat shock cognate 71 kDa protein isoform 1 | gi 5729877         | 5                  | 2                      | TTPSYVAFTDTER        | 76        |
|     |                                             |                    |                    |                        | TVTNAVVTVPAYFNDSQR   | 105       |
| 766 | Triosephosphate isomerase                   | gi 999892          | 25                 | 3                      | DCGATWVVLGHSER       | 90        |
|     |                                             |                    |                    |                        | VPADTEVVCAPPTAYIDFAR | 156       |

| No. | Protein description                                 | NCBI accession no. | Sequence coverage% | Matched peptide number | Peptide sequence              | Ion score |
|-----|-----------------------------------------------------|--------------------|--------------------|------------------------|-------------------------------|-----------|
|     |                                                     |                    |                    |                        | ELASQPDVDGFLVGGASLKPEFVDIINAK | 117       |
| 767 | Glutathione S-transferase P                         | gi 23200510        | 23                 | 3                      | PPYTVVYFPVR                   | 78        |
|     |                                                     |                    |                    |                        | ALPGQLKPFETLLSQNQGK           | 50        |
|     |                                                     |                    |                    |                        | YISLIYTNYEAGKDDYVK            | 49        |
| 768 | hypothetical protein                                | gi 31873302        | 10                 | 4                      | YISPDQLADLYK                  | 51        |
|     |                                                     |                    |                    |                        | VVIGMDVAASEFFR                | 72        |
|     |                                                     |                    |                    |                        | VVIGMDVAASEFFR                | 41        |
|     |                                                     |                    |                    |                        | AAVPSGASTGIYEALRL             | 138       |
| 769 | aldehyde dehydrogenase 1                            | gi 2183299         | 10                 | 4                      | QAFQIGSPWR                    | 53        |
|     |                                                     |                    |                    |                        | EEIFGPVQQIMK                  | 43        |
|     |                                                     |                    |                    |                        | TIPIDGNFFTYTR                 | 95        |
|     |                                                     |                    |                    |                        | IFVEESIYDEFVR                 | 106       |
| 770 | N(G),N(G)-dimethylarginine dimethylaminohydrolase 1 | gi 134104755       | 13                 | 3                      | ALPESLGQHALR                  | 68        |
|     |                                                     |                    |                    |                        | DENATLDGGDVLFTGR              | 107       |
|     |                                                     |                    |                    |                        | LQLNIVEMKDENATLDGGDVLFTGR     | 143       |

| No. | Protein description                      | NCBI accession no. | Sequence coverage% | Matched peptide number | Peptide sequence    | Ion score |
|-----|------------------------------------------|--------------------|--------------------|------------------------|---------------------|-----------|
| 771 | Unknown                                  | gi 15679996        | 11                 | 2                      | FQNALLVR            | 41        |
|     |                                          |                    |                    |                        | KVPQVSTPTLVEVSR     | 80        |
| 772 | Glyceraldehyde-3-phosphate dehydrogenase | gi 67464043        | 8                  | 2                      | VPTANVSVVDLTCR      | 43        |
|     |                                          |                    |                    |                        | LISWYDNEFGYSNR      | 58        |
| 773 | glutathione S-transferase P              | gi 4504183         | 15                 | 2                      | PPYTVVYFPVR         | 42        |
|     |                                          |                    |                    |                        | ALPGQLKPFETLLSQNQGK | 48        |
| 774 | aldehyde dehydrogenase 1                 | gi 2183299         | 13                 | 5                      | QAFQIGSPWR          | 50        |
|     |                                          |                    |                    |                        | TIPIDGNFFTYTR       | 111       |
|     |                                          |                    |                    |                        | IFVEESIYDEFVR       | 110       |
|     |                                          |                    |                    |                        | ELGEYGFHEYTEVK      | 40        |
|     |                                          |                    |                    |                        | GYFVQPTVFSNVTDEMRR  | 39        |
| 775 | Transferrin                              | gi 37747855        | 4                  | 2                      | EGYYGYTGAFR         | 79        |
|     |                                          |                    |                    |                        | ADRDQYELLCLDNTR     | 67        |
| 776 | heat shock protein 27                    | gi 662841          | 26                 | 4                      | QLSSGVSEIR          | 51        |
|     |                                          |                    |                    |                        | LFDQAFGLPR          | 83        |



| No. | Protein description                            | NCBI accession no. | Sequence coverage% | Matched peptide number | Peptide sequence           | Ion score |
|-----|------------------------------------------------|--------------------|--------------------|------------------------|----------------------------|-----------|
|     |                                                |                    |                    |                        | VSLDVNHFAPELTVK            | 80        |
|     |                                                |                    |                    |                        | LATQSNEITIPVTFESR          | 100       |
| 777 | Carbonic anhydrase 2                           | gi 157830746       | 17                 | 3                      | SADFTNFDPR                 | 51        |
|     |                                                |                    |                    |                        | AVQQPDGLAVLGIFLK           | 45        |
|     |                                                |                    |                    |                        | YDPSLKPLSVSYDQATSLR        | 94        |
| 778 | peroxiredoxin-4                                | gi 5453549         | 9                  | 2                      | QITLNDLPVGR                | 63        |
|     |                                                |                    |                    |                        | DYGVYLEDSGHTLR             | 128       |
| 779 | Heat-Shock 70kd Protein 42kd Atpase            | gi 6729803         | 9                  | 4                      | AQIHDLVLVGGSTR             | 72        |
|     |                                                |                    |                    |                        | TTPSYVAFTDTER              | 60        |
|     |                                                |                    |                    |                        | ATAGDTHLGGEDFDNR           | 68        |
|     |                                                |                    |                    |                        | IINEPTAAAIAYGLDR           | 59        |
| 780 | phosphatidylethanolamine binding protein [Homo | gi 14585855        | 22                 | 2                      | IQQQELSAYQAPSPAHSGFHR      | 85        |
|     |                                                |                    |                    |                        | FHLGPEASTQFMTQNYQDSPTLQAPR | 79        |
| 781 | calreticulin precursor variant                 | gi 62897681        | 7                  | 2                      | EQFLDGDGWTSR               | 68        |
|     |                                                |                    |                    |                        | IKDPDASKPEDWDER            | 79        |

| No. | Protein description                         | NCBI accession no. | Sequence coverage% | Matched peptide number | Peptide sequence        | Ion score |
|-----|---------------------------------------------|--------------------|--------------------|------------------------|-------------------------|-----------|
| 782 | creatine kinase B-type                      | gi 21536286        | 21                 | 5                      | DLFDPIIEDR              | 50        |
|     |                                             |                    |                    |                        | VLTPELYAELR             | 50        |
|     |                                             |                    |                    |                        | LAVEALSSLDGDLAGR        | 93        |
|     |                                             |                    |                    |                        | GTGGVDTAAVGGVFDVSNADR   | 80        |
|     |                                             |                    |                    |                        | TDLNPDNLQGGDDLDPNYVLSSR | 156       |
| 783 | unnamed protein product                     | gi 189054552       | 7                  | 4                      | FQNALLVR                | 51        |
|     |                                             |                    |                    |                        | VPQVSTPTLVEVSR          | 47        |
|     |                                             |                    |                    |                        | KVPQVSTPTLVEVSR         | 76        |
|     |                                             |                    |                    |                        | VHTECCHGDLLCADDR        | 55        |
| 784 | VCP protein                                 | gi 48257098        | 7                  | 3                      | EVDIGIPDATGR            | 47        |
|     |                                             |                    |                    |                        | ELQELVQYPVEHPDK         | 37        |
|     |                                             |                    |                    |                        | QTNPSAMEVEEDDPVEIR      | 84        |
| 785 | heat shock cognate 71 kDa protein isoform 1 | gi 5729877         | 7                  | 3                      | FEELNADLFR              | 39        |
|     |                                             |                    |                    |                        | STAGDTHLGGEDFDNR        | 57        |
|     |                                             |                    |                    |                        | TVTNAVVTVPAYFNDSQR      | 83        |

| No. | Protein description                             | NCBI accession no. | Sequence coverage% | Matched peptide number | Peptide sequence        | Ion score |
|-----|-------------------------------------------------|--------------------|--------------------|------------------------|-------------------------|-----------|
| 786 | GRP78 precursor                                 | gi 386758          | 8                  | 4                      | SDIDEIVLVGGSTR          | 103       |
|     |                                                 |                    |                    |                        | KSDIDEIVLVGGSTR         | 101       |
|     |                                                 |                    |                    |                        | DNHLLGTFDLTGIPPAPR      | 138       |
|     |                                                 |                    |                    |                        | IEIESFYEGEDFSETLTR      | 138       |
| 787 | Niemann-Pick disease, type C2 precursor variant | gi 62896507        | 26                 | 2                      | EVNVSPCPTQCQLSK         | 39        |
|     |                                                 |                    |                    |                        | AVVHGILMGVPVFPPIPEPDGCK | 76        |
| 789 | heat shock cognate 71 kDa protein isoform 1     | gi 5729877         | 11                 | 4                      | FEELNADLFR              | 52        |
|     |                                                 |                    |                    |                        | STAGDTHLGGEDFDNR        | 79        |
|     |                                                 |                    |                    |                        | TVTNAVVTVPAYFNDSQR      | 90        |
|     |                                                 |                    |                    |                        | QTQTFTTYSNQPGLVIQVYEGER | 161       |
| 791 | glutathione S-transferase Mu 3                  | gi 23065552        | 13                 | 2                      | LKPQYLEELPGQLK          | 41        |
|     |                                                 |                    |                    |                        | LTFVDFLTYDILDQNR        | 87        |
| 792 | tropomyosin 2 (beta) isoform 2 variant          | gi 62898077        | 14                 | 3                      | IQLVEEELDR              | 62        |
|     |                                                 |                    |                    |                        | KLVILEGELER             | 61        |

| No. | Protein description     | NCBI accession no. | Sequence coverage% | Matched peptide number | Peptide sequence     | Ion score |
|-----|-------------------------|--------------------|--------------------|------------------------|----------------------|-----------|
|     |                         |                    |                    |                        | EENVEIHQTLDQTLLELNNL | 162       |
| 793 | unnamed protein product | gi 221039588       | 8                  | 2                      | EQFNEFR              | 55        |
|     |                         |                    |                    |                        | IDNDGGDGFVTTEELK     | 81        |
| 794 | Tubulin, beta 2C        | gi 23958133        | 6                  | 2                      | FPGQLNADLR           | 72        |
|     |                         |                    |                    |                        | GHYTEGAELVDSVLDVVR   | 154       |
| 795 | unnamed protein product | gi 35655           | 6                  | 2                      | VDATEESDLAQQYGVR     | 89        |
|     |                         |                    |                    |                        | ILFIFIDSDHTDNQR      | 53        |
| 796 | GRP78 precursor         | gi 386758          | 10                 | 5                      | SDIDEIVLVGGSTR       | 78        |
|     |                         |                    |                    |                        | KSDIDEIVLVGGSTR      | 61        |
|     |                         |                    |                    |                        | VTHAVVTPPAYFNDAQR    | 68        |
|     |                         |                    |                    |                        | DNHLLGTFDLTGIPPAPR   | 64        |
|     |                         |                    |                    |                        | IEIESFYEGEDFSETLTR   | 115       |
| 797 | hypothetical protein    | gi 31873439        | 7                  | 2                      | QLFHPEQLITGK         | 63        |
|     |                         |                    |                    |                        | FDGALNVDLTEFQTNLVP   | 56        |
| 798 | actin, cytoplasmic 2    | gi 4501887         | 18                 | 4                      | QEYDESGPSIVHR        | 101       |
|     |                         |                    |                    |                        | SYELPDGQVITIGNER     | 128       |

| No. | Protein description                                 | NCBI accession no. | Sequence coverage% | Matched peptide number | Peptide sequence      | Ion score |
|-----|-----------------------------------------------------|--------------------|--------------------|------------------------|-----------------------|-----------|
|     |                                                     |                    |                    |                        | VAPEEHPVLLTEAPLNPK    | 72        |
|     |                                                     |                    |                    |                        | DLYANTVLSGGTTMYPGIADR | 45        |
| 799 | proteasome (prosome, macropain) subunit, alpha type | gi 54696300        | 25                 | 4                      | GVNTFSPEGR            | 47        |
|     |                                                     |                    |                    |                        | LFQVEYAIEAIK          | 72        |
|     |                                                     |                    |                    |                        | AIGSASEGAQSSLQEVYHK   | 89        |
|     |                                                     |                    |                    |                        | GPQLFHMDPSGTFVQCDAR   | 40        |
| 800 | actin, cytoplasmic 2                                | gi 4501887         | 18                 | 4                      | QEYDESGPSIVHR         | 87        |
|     |                                                     |                    |                    |                        | SYELPDGQVITIGNER      | 131       |
|     |                                                     |                    |                    |                        | VAPEEHPVLLTEAPLNPK    | 57        |
|     |                                                     |                    |                    |                        | DLYANTVLSGGTTMYPGIADR | 43        |
| 801 | Glyceraldehyde-3-phosphate dehydrogenase            | gi 67464043        | 8                  | 2                      | VPTANVSVDLTCR         | 61        |
|     |                                                     |                    |                    |                        | LISWYDNEFGYSNR        | 64        |
| 802 | hypothetical protein                                | gi 31873302        | 10                 | 4                      | YISPDQLADLYK          | 54        |
|     |                                                     |                    |                    |                        | VVIGMDVAASEFFR        | 55        |

| No. | Protein description                  | NCBI accession no. | Sequence coverage% | Matched peptide number | Peptide sequence   | Ion score |
|-----|--------------------------------------|--------------------|--------------------|------------------------|--------------------|-----------|
|     |                                      |                    |                    |                        | VVIGMDVAASEFFR     | 43        |
|     |                                      |                    |                    |                        | AAVPSGASTGIYEALRL  | 141       |
| 803 | aldehyde dehydrogenase 1A1           | gi 21361176        | 5                  | 2                      | TIPIDGNFFTYTR      | 68        |
|     |                                      |                    |                    |                        | IFVEESIDEFVR       | 64        |
| 804 | Chain A, Aldehyde Reductase          | gi 157834561       | 8                  | 2                      | HHPEDVEPALR        | 39        |
|     |                                      |                    |                    |                        | GLEVTAYSPLGSSDR    | 91        |
| 805 | Unknown                              | gi 15679996        | 11                 | 2                      | FQNALLVR           | 38        |
|     |                                      |                    |                    |                        | KVPQVSTPTLVEVSR    | 75        |
| 806 | GRP78 precursor                      | gi 386758          | 8                  | 4                      | SDIDEIVLVGGSTR     | 52        |
|     |                                      |                    |                    |                        | KSDIDEIVLVGGSTR    | 39        |
|     |                                      |                    |                    |                        | DNHLLGTFDLTGIPPAPR | 44        |
|     |                                      |                    |                    |                        | IEIESFYEGEDFSETLTR | 77        |
| 807 | peroxiredoxin-2 isoform a            | gi 32189392        | 15                 | 3                      | QITVNDLPVGR        | 62        |
|     |                                      |                    |                    |                        | EGGLGPLNIPLLDVTR   | 161       |
|     |                                      |                    |                    |                        | KEGGLGPLNIPLLDVTR  | 146       |
| 808 | heat shock 70kDa protein 8 isoform 1 | gi 62897129        | 7                  | 3                      | FEELNADLFR         | 87        |

| No. | Protein description         | NCBI accession no. | Sequence coverage% | Matched peptide number | Peptide sequence       | Ion score |
|-----|-----------------------------|--------------------|--------------------|------------------------|------------------------|-----------|
|     | variant                     |                    |                    |                        |                        |           |
|     |                             |                    |                    |                        | NQTAEKEEFEHQK          | 59        |
|     |                             |                    |                    |                        | QTQTFTTYSNQPGLIQVYEGER | 131       |
| 809 | heat shock protein 27       | gi 662841          | 21                 | 3                      | LFDQAFGLPR             | 70        |
|     |                             |                    |                    |                        | VSLDVNHFAPDELTVK       | 51        |
|     |                             |                    |                    |                        | LATQSNEITIPVTFESR      | 84        |
| 810 | peptidylprolyl isomerase A  | gi 10863927        | 25                 | 3                      | FEDENFILK              | 46        |
|     |                             |                    |                    |                        | IIPGFMCQGGDFTR         | 51        |
|     |                             |                    |                    |                        | VNPTVFFDIAVDGEPLGR     | 104       |
| 811 | Serum albumin precursor     | gi 157830361       | 4                  | 2                      | FQNALLVR               | 49        |
|     |                             |                    |                    |                        | VHTECCHGDLLECADDR      | 95        |
| 812 | Unknown                     | gi 15679996        | 11                 | 2                      | FQNALLVR               | 62        |
|     |                             |                    |                    |                        | KVPQVSTPTLVEVSR        | 51        |
| 813 | Triosephosphate isomerase   | gi 999892          | 13                 | 2                      | HVFGESDELIGQK          | 76        |
|     |                             |                    |                    |                        | VPADTEVVCAPPTAYIDFAR   | 106       |
| 814 | Human Carbonic Anhydrase li | gi 157834071       | 24                 | 4                      | SADFTNFDPR             | 62        |

| No. | Protein description                      | NCBI accession no. | Sequence coverage% | Matched peptide number | Peptide sequence        | Ion score |
|-----|------------------------------------------|--------------------|--------------------|------------------------|-------------------------|-----------|
|     |                                          |                    |                    |                        | AVQQPDGLAVLGIFLK        | 70        |
|     |                                          |                    |                    |                        | ILNNGHSFNVEFDDSQDK      | 109       |
|     |                                          |                    |                    |                        | YDPSLKPLSVSYDQATSLR     | 112       |
| 815 | Unknown                                  | gi 15679996        | 11                 | 2                      | FQNALLVR                | 41        |
|     |                                          |                    |                    |                        | KVPQVSTPTLVEVSR         | 45        |
| 816 | Protein disulfide-isomerase A3 precursor | gi 220702506       | 12                 | 4                      | FLQDYFDGNLK             | 49        |
|     |                                          |                    |                    |                        | ELSDFISYLQR             | 67        |
|     |                                          |                    |                    |                        | SDVLELTDDNFESR          | 76        |
|     |                                          |                    |                    |                        | TFSHELSDFLESTAGEIPVVAIR | 212       |
| 817 | AGR2                                     | gi 68012756        | 23                 | 3                      | HLSPDGQYVPR             | 38        |
|     |                                          |                    |                    |                        | LYAYEPADTALLLDNMK       | 50        |
|     |                                          |                    |                    |                        | LAEQVLLNLVYETTDK        | 75        |
| 818 | endoplasmin precursor                    | gi 4507677         | 13                 | 7                      | GLFDEYGSK               | 47        |
|     |                                          |                    |                    |                        | FAFQAEVNR               | 66        |
|     |                                          |                    |                    |                        | SILFVPTSAPR             | 47        |
|     |                                          |                    |                    |                        | GVVDSDDLPLNVSR          | 82        |



| No. | Protein description             | NCBI accession no. | Sequence coverage% | Matched peptide number | Peptide sequence         | Ion score |
|-----|---------------------------------|--------------------|--------------------|------------------------|--------------------------|-----------|
|     |                                 |                    |                    |                        | EEEAIQLDGLNASQIR         | 88        |
|     |                                 |                    |                    |                        | ESDDPMAYIHFTAEGEVTFK     | 40        |
|     |                                 |                    |                    |                        | TDDEVVQREEEAIQLDGLNASQIR | 125       |
| 819 | galactokinase 1                 | gi 119609722       | 16                 | 5                      | LQFPLPTAQR               | 39        |
|     |                                 |                    |                    |                        | EVQLEEEAAR               | 50        |
|     |                                 |                    |                    |                        | QPQVAELLAEAR             | 58        |
|     |                                 |                    |                    |                        | EEFGAEP LAVSAPGR         | 68        |
|     |                                 |                    |                    |                        | KDGLVSLTTSEGADEPQR       | 69        |
| 820 | dynactin subunit 2              | gi 5453629         | 8                  | 2                      | VSALDLAVLDQVEAR          | 76        |
|     |                                 |                    |                    |                        | ENLATVEGNFASIDER         | 96        |
| 821 | beta globin chain variant       | gi 13549112        | 15                 | 2                      | LLVVYPWTQR               | 54        |
|     |                                 |                    |                    |                        | EFTQPVQAAYQK             | 52        |
| 822 | actin, cytoplasmic 2            | gi 4501887         | 8                  | 2                      | QEYDESGPSIVHR            | 62        |
|     |                                 |                    |                    |                        | SYELPDGQVITIGNER         | 128       |
| 823 | Chain A, Native Human Lysosomal | gi 30749651        | 6                  | 2                      | GSYSLSHVYTPNDVR          | 71        |
|     |                                 |                    |                    |                        | EISEVFPDQFIHLGGDEVEFK    | 96        |

| No. | Protein description                           | NCBI accession no. | Sequence coverage% | Matched peptide number | Peptide sequence       | Ion score |
|-----|-----------------------------------------------|--------------------|--------------------|------------------------|------------------------|-----------|
| 824 | Vitamin D-binding protein                     | gi 139641          | 7                  | 2                      | EDFTSLSLVLYSR          | 49        |
|     |                                               |                    |                    |                        | HQPQEFPTYVEPTNDEICEAFR | 72        |
| 825 | phosphoglycerate mutase 2                     | gi 50593010        | 11                 | 2                      | VLIAAHGNSLR            | 40        |
|     |                                               |                    |                    |                        | ELKPTKPMQFLGDEETVR     | 39        |
| 826 | Unknown                                       | gi 15679996        | 11                 | 2                      | FQNALLVR               | 42        |
|     |                                               |                    |                    |                        | KVPQVSTPTLVEVSR        | 55        |
| 827 | lamin-A/C isoform 2                           | gi 5031875         | 7                  | 3                      | AAEAEELGDAR            | 41        |
|     |                                               |                    |                    |                        | LQEKEDLQELNDR          | 76        |
|     |                                               |                    |                    |                        | NSNLVGAAHEELQQR        | 63        |
| 828 | heat shock protein 60                         | gi 77702086        | 11                 | 3                      | AAVEEGIVLGGGCALLR      | 75        |
|     |                                               |                    |                    |                        | KPLVIAEDVDGEALSTLVNLR  | 138       |
|     |                                               |                    |                    |                        | LVQDVANNTNEEAGDGTATVLR | 119       |
| 829 | protein disulfide isomerase-related protein 5 | gi 1710248         | 11                 | 3                      | TGEAIVDAALSALR         | 91        |
|     |                                               |                    |                    |                        | LAAVDATVNQVLASR        | 75        |
|     |                                               |                    |                    |                        | LYSSDDVIELTPSNFNR      | 136       |

| No. | Protein description                      | NCBI accession no. | Sequence coverage% | Matched peptide number | Peptide sequence    | Ion score |
|-----|------------------------------------------|--------------------|--------------------|------------------------|---------------------|-----------|
| 830 | mutant desmin                            | gi 71011128        | 15                 | 5                      | VAELYEEELR          | 69        |
|     |                                          |                    |                    |                        | FASEASGYQDNIAR      | 106       |
|     |                                          |                    |                    |                        | RIESLNEEIAFLK       | 48        |
|     |                                          |                    |                    |                        | FLEQQNAALAAEVNR     | 146       |
|     |                                          |                    |                    |                        | LQEEIQLKEEAENNLAAFR | 114       |
| 831 | actin, alpha cardiac muscle 1 proprotein | gi 4885049         | 15                 | 4                      | GYSFVTTAER          | 51        |
|     |                                          |                    |                    |                        | QEYDEAGPSIVHR       | 61        |
|     |                                          |                    |                    |                        | SYELPDGQVITIGNER    | 131       |
|     |                                          |                    |                    |                        | VAPEEHPTLLTEAPLNPK  | 59        |
| 832 | Protein disulfide-isomerase A3 precursor | gi 220702506       | 5                  | 2                      | DLLIAYDVDYEK        | 53        |
|     |                                          |                    |                    |                        | SDVLELTDDNFESR      | 89        |
| 833 | unnamed protein product                  | gi 189054552       | 4                  | 2                      | FQNALLVR            | 62        |
|     |                                          |                    |                    |                        | VHTECCHGDLLECADDR   | 74        |
| 834 | ACO2                                     | gi 49168620        | 4                  | 2                      | SQFTITPGSEQIR       | 42        |
|     |                                          |                    |                    |                        | NAVVTQEFGPVPDTAR    | 53        |
| 835 | mutant desmin                            | gi 71011128        | 8                  | 3                      | VAELYEEELR          | 54        |

| No. | Protein description                           | NCBI accession no. | Sequence coverage% | Matched peptide number | Peptide sequence    | Ion score |
|-----|-----------------------------------------------|--------------------|--------------------|------------------------|---------------------|-----------|
|     |                                               |                    |                    |                        | FASEASGYQDNIAR      | 58        |
|     |                                               |                    |                    |                        | FLEQQNAALAAEVNR     | 137       |
| 836 | tropomyosin alpha-4 chain isoform 1           | gi 223555975       | 8                  | 2                      | IQLVEEELDR          | 66        |
|     |                                               |                    |                    |                        | KLVILEGELER         | 45        |
| 837 | unnamed protein product                       | gi 16552261        | 9                  | 3                      | VELQELNDR           | 38        |
|     |                                               |                    |                    |                        | ISLPLPNFSSLNLR      | 56        |
|     |                                               |                    |                    |                        | EMEENFAVEAANYQDTIGR | 86        |
| 838 | actin, cytoplasmic 2                          | gi 4501887         | 13                 | 3                      | QEYDESGPSIVHR       | 86        |
|     |                                               |                    |                    |                        | SYELPDGQVITIGNER    | 141       |
|     |                                               |                    |                    |                        | VAPEEHPVLLTEAPLNPK  | 48        |
| 839 | actin, gamma-enteric smooth muscle propeptide | gi 4501889         | 7                  | 2                      | GYSFVTTAER          | 39        |
|     |                                               |                    |                    |                        | SYELPDGQVITIGNER    | 130       |
| 840 | heat shock cognate 71 kDa protein isoform 1   | gi 5729877         | 11                 | 5                      | DAGTIAGLNVLRL       | 64        |
|     |                                               |                    |                    |                        | VEIANDQGNR          | 46        |

| No. | Protein description        | NCBI accession no. | Sequence coverage% | Matched peptide number | Peptide sequence    | Ion score |
|-----|----------------------------|--------------------|--------------------|------------------------|---------------------|-----------|
|     |                            |                    |                    |                        | TTPSYVAFTDTER       | 95        |
|     |                            |                    |                    |                        | STAGDTHLGGEDFDNR    | 57        |
|     |                            |                    |                    |                        | TVTNAVVTVPAYFNDSQR  | 97        |
| 841 | Unknown                    | gi 15679996        | 11                 | 2                      | FQNALLVR            | 43        |
|     |                            |                    |                    |                        | KVPQVSTPTLVEVSR     | 58        |
| 842 | mitochondrial ATP synthase | gi 89574029        | 17                 | 5                      | AHGGYSVFAGVGER      | 82        |
|     |                            |                    |                    |                        | VALTGLTVAEYFR       | 48        |
|     |                            |                    |                    |                        | LVLEVAQHLGESTVR     | 83        |
|     |                            |                    |                    |                        | DQEGQDVLLFIDNIFR    | 93        |
|     |                            |                    |                    |                        | AIAELGIYPAVDPLDSTSR | 60        |
| 843 | GRP78 precursor            | gi 386758          | 7                  | 3                      | SDIDEIVLVGGSTR      | 98        |
|     |                            |                    |                    |                        | ITPSYVAFTPEGER      | 79        |
|     |                            |                    |                    |                        | IEIESFYEGEDFSETLTR  | 132       |
| 844 | Unknown                    | gi 15679996        | 11                 | 2                      | FQNALLVR            | 42        |
|     |                            |                    |                    |                        | KVPQVSTPTLVEVSR     | 48        |
| 845 | AGR2                       | gi 68012756        | 24                 | 3                      | HLSPDGQYVPR         | 38        |

| No. | Protein description        | NCBI accession no. | Sequence coverage% | Matched peptide number | Peptide sequence    | Ion score |
|-----|----------------------------|--------------------|--------------------|------------------------|---------------------|-----------|
|     |                            |                    |                    |                        | LAEQFVLLNLVYETTDK   | 39        |
|     |                            |                    |                    |                        | LYAYEPADTALLLDNMKK  | 46        |
| 846 | peptidylprolyl isomerase A | gi 10863927        | 19                 | 2                      | IIPGFMCQGGDFTR      | 44        |
|     |                            |                    |                    |                        | VNPTVFFDIAVDGEPLGR  | 93        |
| 847 | mutant desmin              | gi 71011128        | 7                  | 2                      | FLEQQNAALAAEVNR     | 86        |
|     |                            |                    |                    |                        | LQEEIQLKEEAENNLAAFR | 57        |
| 848 | mutant desmin              | gi 71011128        | 8                  | 3                      | VAELYEEELR          | 41        |
|     |                            |                    |                    |                        | FASEASGYQDNIAR      | 69        |
|     |                            |                    |                    |                        | FLEQQNAALAAEVNR     | 121       |
| 849 | GRP78 precursor            | gi 386758          | 8                  | 4                      | SDIDEIVLVGGSTR      | 89        |
|     |                            |                    |                    |                        | KSDIDEIVLVGGSTR     | 85        |
|     |                            |                    |                    |                        | DNHLLGTFDLTGIPPAPR  | 110       |
|     |                            |                    |                    |                        | IEIESFYEGEDFSETLTR  | 111       |
| 850 | beta globin chain variant  | gi 13549112        | 17                 | 2                      | VNVDEVGGEALGR       | 65        |
|     |                            |                    |                    |                        | EFTQPVQAAYQK        | 49        |
| 851 | actin, cytoplasmic 2       | gi 4501887         | 8                  | 2                      | QEYDESGPSIVHR       | 68        |

| No. | Protein description                      | NCBI accession no. | Sequence coverage% | Matched peptide number | Peptide sequence     | Ion score |
|-----|------------------------------------------|--------------------|--------------------|------------------------|----------------------|-----------|
|     |                                          |                    |                    |                        | SYELPDGQVITIGNER     | 110       |
| 852 | aldehyde dehydrogenase 1A1               | gi 21361176        | 8                  | 3                      | EEIFGPVQQIMK         | 47        |
|     |                                          |                    |                    |                        | TIPIDGNFFTYTR        | 88        |
|     |                                          |                    |                    |                        | IFVEESYDEFVR         | 101       |
| 853 | peroxiredoxin-2 isoform a                | gi 32189392        | 15                 | 3                      | QITVNDLPVGR          | 49        |
|     |                                          |                    |                    |                        | EGGLGPLNIPLLADVTR    | 134       |
|     |                                          |                    |                    |                        | KEGGLGPLNIPLLADVTR   | 140       |
| 854 | Carbonic anhydrase 2                     | gi 157830746       | 17                 | 3                      | SADFTNFDPR           | 44        |
|     |                                          |                    |                    |                        | AVQQPDGLAVLGIFLK     | 37        |
|     |                                          |                    |                    |                        | YDPSLKPLSVSYDQATSLR  | 120       |
| 855 | Triosephosphate isomerase                | gi 999892          | 13                 | 2                      | HVFGESDELIGQK        | 89        |
|     |                                          |                    |                    |                        | VPADTEVVCAPPTAYIDFAR | 107       |
| 856 | Protein disulfide-isomerase A3 precursor | gi 220702506       | 5                  | 2                      | DLIIAYDVVDYEK        | 46        |
|     |                                          |                    |                    |                        | SDVLELTDDNFESR       | 87        |
| 857 | protein disulfide isomerase              | gi 860986          | 17                 | 6                      | FVMQEEFSR            | 37        |
|     |                                          |                    |                    |                        | FLQDYFDGNLK          | 43        |

| No. | Protein description                      | NCBI accession no. | Sequence coverage% | Matched peptide number | Peptide sequence         | Ion score |
|-----|------------------------------------------|--------------------|--------------------|------------------------|--------------------------|-----------|
|     |                                          |                    |                    |                        | ELSDFISYLQR              | 64        |
|     |                                          |                    |                    |                        | MDATANDVPSPYEVK          | 75        |
|     |                                          |                    |                    |                        | VVVAENFDEIVNNENK         | 58        |
|     |                                          |                    |                    |                        | TFSHELSDFGLESTAGEIPVVAIR | 208       |
| 858 | peptidylprolyl isomerase A               | gi 10863927        | 25                 | 3                      | FEDENFILK                | 38        |
|     |                                          |                    |                    |                        | IIPGFMCQGGDFTR           | 49        |
|     |                                          |                    |                    |                        | VNPTVFFDIAVDGEPLGR       | 157       |
| 859 | neuropolypeptide h3                      | gi 913159          | 18                 | 2                      | LYTLVLTPDAPSR            | 61        |
|     |                                          |                    |                    |                        | GNDISSGTVLSDYVGSPPK      | 68        |
| 860 | actin, cytoplasmic 2                     | gi 4501887         | 8                  | 2                      | QEYDESGPSIVHR            | 86        |
|     |                                          |                    |                    |                        | SYELPDGQVITIGNER         | 118       |
| 861 | Protein disulfide-isomerase A3 precursor | gi 220702506       | 14                 | 5                      | FVMQEEFSR                | 54        |
|     |                                          |                    |                    |                        | FLQDYFDGNLK              | 50        |
|     |                                          |                    |                    |                        | ELSDFISYLQR              | 77        |
|     |                                          |                    |                    |                        | SDVLELTDDNFESR           | 78        |
|     |                                          |                    |                    |                        | TFSHELSDFGLESTAGEIPVVAIR | 180       |



| No. | Protein description                      | NCBI accession no. | Sequence coverage% | Matched peptide number | Peptide sequence      | Ion score |
|-----|------------------------------------------|--------------------|--------------------|------------------------|-----------------------|-----------|
| 862 | GRP78 precursor                          | gi 386758          | 12                 | 6                      | SDIDEIVLVGGSTR        | 96        |
|     |                                          |                    |                    |                        | AKFEELNMDLFR          | 38        |
|     |                                          |                    |                    |                        | KSDIDEIVLVGGSTR       | 97        |
|     |                                          |                    |                    |                        | DNHLLGTFDLTGIPPAPR    | 110       |
|     |                                          |                    |                    |                        | GVPQIEVTFEIDVNGILR    | 58        |
|     |                                          |                    |                    |                        | IEIESFYEGEDFSETLTR    | 124       |
| 863 | ATP5A1 protein                           | gi 13938339        | 10                 | 3                      | EAYPGDVVFLHSR         | 126       |
|     |                                          |                    |                    |                        | QQQYSPMAIEEQVAVIYAGVR | 63        |
|     |                                          |                    |                    |                        | EVAFAQFGSDLDAATQQLSR  | 67        |
| 864 | Protein disulfide-isomerase A3 precursor | gi 220702506       | 8                  | 3                      | LAPEYAAAATR           | 45        |
|     |                                          |                    |                    |                        | DLLIAYDVDYEK          | 48        |
|     |                                          |                    |                    |                        | SDVLELTDDNFESR        | 92        |
| 865 | aldehyde dehydrogenase 1A1               | gi 21361176        | 5                  | 2                      | TIPIDGNFFTYTR         | 74        |
|     |                                          |                    |                    |                        | IFVEESIYDEFVR         | 92        |
| 866 | actin, alpha cardiac muscle 1 proprotein | gi 4885049         | 10                 | 3                      | GYSFVTTAER            | 66        |
|     |                                          |                    |                    |                        | QEYDEAGPSIVHR         | 64        |

| No. | Protein description                                 | NCBI accession no. | Sequence coverage% | Matched peptide number | Peptide sequence  | Ion score |
|-----|-----------------------------------------------------|--------------------|--------------------|------------------------|-------------------|-----------|
|     |                                                     |                    |                    |                        | SYELPDGQVITIGNER  | 131       |
| 867 | hypothetical protein                                | gi 51476390        | 4                  | 2                      | LVNEVTEFAK        | 70        |
|     |                                                     |                    |                    |                        | QEPERNECFLQHK     | 43        |
| 868 | Unknown                                             | gi 15679996        | 11                 | 2                      | FQNALLVR          | 42        |
|     |                                                     |                    |                    |                        | KVPQVSTPTLVEVSR   | 72        |
| 869 | unnamed protein product                             | gi 37403           | 9                  | 3                      | IQLVEEELDR        | 40        |
|     |                                                     |                    |                    |                        | IQLVQQQADDAEER    | 39        |
|     |                                                     |                    |                    |                        | KIQLVQQQADDAEER   | 49        |
| 870 | unnamed protein product                             | gi 189054552       | 7                  | 3                      | FQNALLVR          | 58        |
|     |                                                     |                    |                    |                        | KVPQVSTPTLVEVSR   | 59        |
|     |                                                     |                    |                    |                        | VHTECCHGDLLECADDR | 51        |
| 871 | hypothetical protein                                | gi 51476390        | 5                  | 3                      | LCTVATLR          | 46        |
|     |                                                     |                    |                    |                        | LVNEVTEFAK        | 67        |
|     |                                                     |                    |                    |                        | QEPERNECFLQHK     | 59        |
| 873 | N(G),N(G)-dimethylarginine dimethylaminohydrolase 1 | gi 134104755       | 10                 | 2                      | ALPESLGQHALR      | 94        |

| No. | Protein description                                | NCBI accession no. | Sequence coverage% | Matched peptide number | Peptide sequence         | Ion score |
|-----|----------------------------------------------------|--------------------|--------------------|------------------------|--------------------------|-----------|
|     |                                                    |                    |                    |                        | DENATLDGGDVLFTGR         | 83        |
| 875 | Chain A, Structure Of Human Muscle Pyruvate Kinase | gi 67464392        | 7                  | 2                      | FGVEQDVMVFASFIR          | 54        |
|     |                                                    |                    |                    |                        | TATESFASDPILYRPVAVALDTK  | 42        |
| 876 | protein disulfide isomerase                        | gi 860986          | 10                 | 3                      | ELSDFISYLQR              | 45        |
|     |                                                    |                    |                    |                        | MDATANDVSPYEVR           | 66        |
|     |                                                    |                    |                    |                        | TFSHELSDFGLESTAGEIPVVAIR | 189       |
| 877 | Glutathione S-transferase P                        | gi 23200510        | 10                 | 2                      | PPYTVVYFPVR              | 78        |
|     |                                                    |                    |                    |                        | ALPGQLKPFETLLSQNQGK      | 68        |
| 878 | protein disulfide isomerase-related protein 5      | gi 1710248         | 11                 | 3                      | TGEAIVDAALSALR           | 117       |
|     |                                                    |                    |                    |                        | LAAVDATVNQVLASR          | 60        |
|     |                                                    |                    |                    |                        | LYSSDDVIELTPSNFNR        | 111       |
| 879 | protein disulfide isomerase                        | gi 860986          | 12                 | 4                      | GFPTIYFSPANK             | 37        |
|     |                                                    |                    |                    |                        | ELSDFISYLQR              | 61        |
|     |                                                    |                    |                    |                        | MDATANDVSPYEVR           | 53        |

| No. | Protein description                      | NCBI accession no. | Sequence coverage% | Matched peptide number | Peptide sequence         | Ion score |
|-----|------------------------------------------|--------------------|--------------------|------------------------|--------------------------|-----------|
|     |                                          |                    |                    |                        | TFSHELSDFGLESTAGEIPVVAIR | 177       |
| 880 | Glyceraldehyde-3-phosphate dehydrogenase | gi 67464043        | 8                  | 2                      | VPTANVSVVDLTCR           | 99        |
|     |                                          |                    |                    |                        | LISWYDNEFGYSNR           | 78        |
| 881 | lamin A/C isoform 1 precursor            | gi 27436946        | 4                  | 2                      | LQEKEDLQELNDR            | 47        |
|     |                                          |                    |                    |                        | NSNLVGAAHEELQQSR         | 47        |
| 882 | heat shock protein 27                    | gi 662841          | 13                 | 2                      | LFDQAFGLPR               | 42        |
|     |                                          |                    |                    |                        | LATQSNEITIPVTFESR        | 90        |
| 883 | peroxiredoxin-4                          | gi 5453549         | 9                  | 2                      | QITLNDLPVGR              | 55        |
|     |                                          |                    |                    |                        | DYGVYLEDSGHTLR           | 90        |
| 884 | peroxiredoxin-6                          | gi 4758638         | 10                 | 2                      | LSILYPATTGR              | 59        |
|     |                                          |                    |                    |                        | DFTPVCTTELGR             | 74        |
| 885 | heat shock protein 27                    | gi 662841          | 21                 | 3                      | LFDQAFGLPR               | 76        |
|     |                                          |                    |                    |                        | VSLDVNHFAPDELTVK         | 83        |
|     |                                          |                    |                    |                        | LATQSNEITIPVTFESR        | 102       |
| 886 | unnamed protein product                  | gi 16552261        | 8                  | 3                      | VELQELNDR                | 46        |

| No. | Protein description                      | NCBI accession no. | Sequence coverage% | Matched peptide number | Peptide sequence    | Ion score |
|-----|------------------------------------------|--------------------|--------------------|------------------------|---------------------|-----------|
|     |                                          |                    |                    |                        | EEAENTLQSFR         | 50        |
|     |                                          |                    |                    |                        | EMEENFAVEAANYQDTIGR | 129       |
| 887 | heat shock protein 27                    | gi 662841          | 21                 | 3                      | LFDQAFGLPR          | 63        |
|     |                                          |                    |                    |                        | VSLDVNHFAPDELTVK    | 53        |
|     |                                          |                    |                    |                        | LATQSNEITIPVTFESR   | 92        |
| 888 | lipoprotein Gln I                        | gi 229479          | 8                  | 2                      | DEPPQSPWDR          | 43        |
|     |                                          |                    |                    |                        | THLAPYSDELK         | 66        |
| 889 | Tubulin, beta 2C                         | gi 23958133        | 10                 | 3                      | FPGQLNADLR          | 93        |
|     |                                          |                    |                    |                        | AVLVDLEPGTMDSVR     | 44        |
|     |                                          |                    |                    |                        | GHYTEGAELVDSVLDVVR  | 163       |
| 890 | Glyceraldehyde-3-phosphate dehydrogenase | gi 67464043        | 8                  | 2                      | VPTANVSVVDLTCR      | 68        |
|     |                                          |                    |                    |                        | LISWYDNEFGYSNR      | 53        |
| 891 | peroxiredoxin-6                          | gi 4758638         | 17                 | 4                      | NFDEILR             | 37        |
|     |                                          |                    |                    |                        | LPFPIIDDR           | 76        |
|     |                                          |                    |                    |                        | LSILYPATTGR         | 41        |

| No. | Protein description                      | NCBI accession no. | Sequence coverage% | Matched peptide number | Peptide sequence    | Ion score |
|-----|------------------------------------------|--------------------|--------------------|------------------------|---------------------|-----------|
|     |                                          |                    |                    |                        | DFTPVCTTELGR        | 56        |
| 892 | PGK1                                     | gi 48145549        | 12                 | 3                      | LGDVVYVNDAFGTAHR    | 126       |
|     |                                          |                    |                    |                        | ALESPERPFLAILGGAK   | 49        |
|     |                                          |                    |                    |                        | VLNNMEIGTSLFDEEGAK  | 76        |
| 893 | Annexin A2                               | gi 73909156        | 9                  | 3                      | GVDEVTIVNILTNR      | 94        |
|     |                                          |                    |                    |                        | AEDGSVIDYELIDQDAR   | 73        |
|     |                                          |                    |                    |                        | RAEDGSVIDYELIDQDAR  | 83        |
| 894 | tropomyosin alpha-4 chain isoform 1      | gi 223555975       | 8                  | 2                      | IQLVEEELDR          | 39        |
|     |                                          |                    |                    |                        | KLVILEGELER         | 42        |
| 895 | Glyceraldehyde-3-phosphate dehydrogenase | gi 67464043        | 8                  | 2                      | VPTANVSVDLTCR       | 46        |
|     |                                          |                    |                    |                        | LISWYDNEFGYSNR      | 44        |
| 896 | unnamed protein product                  | gi 16552261        | 6                  | 2                      | EEAENTLQSFRR        | 46        |
|     |                                          |                    |                    |                        | EMEENFAVEAANYQDTIGR | 149       |
| 897 | ALB protein                              | gi 23241675        | 19                 | 5                      | FQNALLVR            | 57        |
|     |                                          |                    |                    |                        | KVPQVSTPTLVEVSR     | 72        |

| No. | Protein description       | NCBI accession no. | Sequence coverage% | Matched peptide number | Peptide sequence              | Ion score |
|-----|---------------------------|--------------------|--------------------|------------------------|-------------------------------|-----------|
|     |                           |                    |                    |                        | RPCFSALEVDETYVPK              | 70        |
|     |                           |                    |                    |                        | VFDEFKPLVEEPQNLIK             | 67        |
|     |                           |                    |                    |                        | EFNAETFTFHADICTLSEK           | 44        |
| 898 | tubulin beta-2C chain     | gi 5174735         | 6                  | 2                      | FPGQLNADLR                    | 41        |
|     |                           |                    |                    |                        | GHYTEGAELVDSVLDVVR            | 49        |
| 899 | PGK1                      | gi 48145549        | 16                 | 4                      | LGDVVYNDAFGTAHR               | 121       |
|     |                           |                    |                    |                        | ALESPERPFLAILGGAK             | 55        |
|     |                           |                    |                    |                        | VLNNMEIGTSLFDEEGAK            | 62        |
|     |                           |                    |                    |                        | ITLPVDFVTADKFDENAK            | 64        |
| 900 | Triosephosphate isomerase | gi 999892          | 20                 | 2                      | VPADTEVVCAPPTAYIDFAR          | 70        |
|     |                           |                    |                    |                        | ELASQPDVDGFLVGGASLKPEFVDIINAK | 55        |
| 901 | unnamed protein product   | gi 16552261        | 7                  | 2                      | ISLPLPNFSSLNLR                | 52        |
|     |                           |                    |                    |                        | EMEENFAVEAANYQDTIGR           | 103       |
| 902 | actin, cytoplasmic 2      | gi 4501887         | 13                 | 3                      | QEYDESGPSIVHR                 | 47        |
|     |                           |                    |                    |                        | SYELPDGQVITIGNER              | 133       |
|     |                           |                    |                    |                        | VAPEEHPVLLTEAPLNP             | 49        |

| No. | Protein description                             | NCBI accession no. | Sequence coverage% | Matched peptide number | Peptide sequence     | Ion score |
|-----|-------------------------------------------------|--------------------|--------------------|------------------------|----------------------|-----------|
| 903 | TSA                                             | gi 1617118         | 9                  | 2                      | EGGLGPLNIPLLADVTR    | 152       |
|     |                                                 |                    |                    |                        | KEGGLGPLNIPLLADVTR   | 84        |
| 904 | dimethylarginine dimethylaminohydrolase 2 [Homo | gi 123279699       | 16                 | 2                      | DFAVSTVPVSGPSHLR     | 70        |
|     |                                                 |                    |                    |                        | IVEIGDENATLDGTDVLFTR | 102       |
| 905 | hypothetical protein                            | gi 51476390        | 3                  | 2                      | YLYEIR               | 44        |
|     |                                                 |                    |                    |                        | QEPERNECFLQHK        | 54        |
| 906 | unnamed protein product                         | gi 16552261        | 7                  | 2                      | ISLPLPNFSSLNLR       | 37        |
|     |                                                 |                    |                    |                        | EMEENFAVEAANYQDTIGR  | 90        |
| 907 | beta actin                                      | gi 4501885         | 13                 | 3                      | QEYDESGPSIVHR        | 45        |
|     |                                                 |                    |                    |                        | SYELPDGQVITIGNER     | 125       |
|     |                                                 |                    |                    |                        | VAPEEHPVLLTEAPLNPK   | 44        |
| 908 | actin, cytoplasmic 2                            | gi 4501887         | 8                  | 2                      | QEYDESGPSIVHR        | 60        |
|     |                                                 |                    |                    |                        | SYELPDGQVITIGNER     | 128       |
| 909 | actin, cytoplasmic 2                            | gi 4501887         | 12                 | 3                      | AGFAGDDAPR           | 51        |
|     |                                                 |                    |                    |                        | SYELPDGQVITIGNER     | 133       |



| No. | Protein description                                 | NCBI accession no. | Sequence coverage% | Matched peptide number | Peptide sequence          | Ion score |
|-----|-----------------------------------------------------|--------------------|--------------------|------------------------|---------------------------|-----------|
|     |                                                     |                    |                    |                        | VAPEEHPVLLTEAPLNPK        | 56        |
| 910 | beta-actin-like protein 2                           | gi 63055057        | 9                  | 2                      | SYELPDGQVITIGNER          | 133       |
|     |                                                     |                    |                    |                        | VAPDEHPILLTEAPLNPK        | 41        |
| 911 | actin, cytoplasmic 2                                | gi 4501887         | 8                  | 2                      | QEYDESGPSIVHR             | 65        |
|     |                                                     |                    |                    |                        | SYELPDGQVITIGNER          | 150       |
| 912 | N(G),N(G)-dimethylarginine dimethylaminohydrolase 1 | gi 134104755       | 13                 | 3                      | ALPESLGQHALR              | 49        |
|     |                                                     |                    |                    |                        | DENATLDGGDVLFTGR          | 38        |
|     |                                                     |                    |                    |                        | LQLNIVEMKDENATLDGGDVLFTGR | 104       |
| 913 | aldehyde dehydrogenase 1A1                          | gi 21361176        | 5                  | 2                      | TIPIDGNFFTYTR             | 40        |
|     |                                                     |                    |                    |                        | IFVEESIYDEFVR             | 75        |
| 914 | heat shock protein 60                               | gi 77702086        | 14                 | 4                      | AAVEEGIVLGGGCALLR         | 103       |
|     |                                                     |                    |                    |                        | ISSIQSIVPALEIANAHR        | 90        |
|     |                                                     |                    |                    |                        | KPLVIAEDVDGEALSTLVNLR     | 193       |
|     |                                                     |                    |                    |                        | LVQDVANNTNEEAGDGTATVLAR   | 119       |
| 915 | actin, cytoplasmic 2                                | gi 4501887         | 8                  | 2                      | QEYDESGPSIVHR             | 68        |

| No. | Protein description         | NCBI accession no. | Sequence coverage% | Matched peptide number | Peptide sequence         | Ion score |
|-----|-----------------------------|--------------------|--------------------|------------------------|--------------------------|-----------|
|     |                             |                    |                    |                        | SYELPDGQVITIGNER         | 148       |
| 916 | hypothetical protein        | gi 31873302        | 7                  | 2                      | VVIGMDVAASEFFR           | 49        |
|     |                             |                    |                    |                        | AAVPSGASTGIYEALRLR       | 128       |
| 917 | actin, cytoplasmic 2        | gi 4501887         | 13                 | 3                      | QEYDESGPSIVHR            | 60        |
|     |                             |                    |                    |                        | SYELPDGQVITIGNER         | 150       |
|     |                             |                    |                    |                        | VAPEEHPVLLTEAPLNPK       | 76        |
| 918 | mutant desmin               | gi 71011128        | 9                  | 3                      | FASEASGYQDNIAR           | 59        |
|     |                             |                    |                    |                        | INLPIQTYSALNFR           | 44        |
|     |                             |                    |                    |                        | FLEQQNAALAAEVNR          | 106       |
| 919 | TapasinERP57 HETERODIMER    | gi 220702506       | 10                 | 3                      | ELSDFISYLQR              | 75        |
|     |                             |                    |                    |                        | SDVLELTDDNFESR           | 70        |
|     |                             |                    |                    |                        | TFSHELSDFGLESTAGEIPVVAIR | 180       |
| 920 | actin, cytoplasmic 2        | gi 4501887         | 8                  | 2                      | QEYDESGPSIVHR            | 45        |
|     |                             |                    |                    |                        | SYELPDGQVITIGNER         | 146       |
| 921 | protein disulfide isomerase | gi 860986          | 9                  | 2                      | DASIVGFFDDSFSEAHSEFLK    | 77        |
|     |                             |                    |                    |                        | TFSHELSDFGLESTAGEIPVVAIR | 123       |

| No. | Protein description        | NCBI accession no. | Sequence coverage% | Matched peptide number | Peptide sequence       | Ion score |
|-----|----------------------------|--------------------|--------------------|------------------------|------------------------|-----------|
| 922 | heat shock protein 60      | gi 77702086        | 14                 | 4                      | AAVEEGIVLGGGCALLR      | 47        |
|     |                            |                    |                    |                        | ISSIQSIVPALEIANAHR     | 46        |
|     |                            |                    |                    |                        | KPLVIAEDVDGEALSTLVLR   | 187       |
|     |                            |                    |                    |                        | LVQDVANNTNEEAGDGTATVLR | 141       |
| 923 | albumin preproprotein      | gi 4502027         | 8                  | 3                      | KVPQVSTPTLVEVSR        | 40        |
|     |                            |                    |                    |                        | RPCFSALEVDETYVPK       | 40        |
|     |                            |                    |                    |                        | VFDEFKPLVEEPQNLIK      | 64        |
| 924 | HSPA9 protein              | gi 21040386        | 6                  | 3                      | AQFEGIVTDLIR           | 63        |
|     |                            |                    |                    |                        | LLGQFTLIGIPPAPR        | 47        |
|     |                            |                    |                    |                        | NAVITVPAYFNDSQR        | 66        |
| 925 | aldehyde dehydrogenase 1A1 | gi 21361176        | 5                  | 2                      | TIPIDGNFFTYTR          | 49        |
|     |                            |                    |                    |                        | IFVEESIYDEFVR          | 89        |
| 926 | SPTAN1 protein             | gi 31565122        | 1                  | 2                      | ELPTAFDYVEFTR          | 46        |
|     |                            |                    |                    |                        | SSLSSAQADFNQLAELDR     | 42        |
| 927 | unnamed protein product    | gi 189065555       | 19                 | 5                      | EGIAQTVFLGLNR          | 107       |
|     |                            |                    |                    |                        | LFVDGQEIAVVYFR         | 118       |

| No. | Protein description        | NCBI accession no. | Sequence coverage% | Matched peptide number | Peptide sequence             | Ion score |
|-----|----------------------------|--------------------|--------------------|------------------------|------------------------------|-----------|
|     |                            |                    |                    |                        | QIEINTISASFGGLASR            | 129       |
|     |                            |                    |                    |                        | IEPEPFENCLLRPGSPAR           | 76        |
|     |                            |                    |                    |                        | ATFAGLYSLDVGEEGDQAIAEALAAPSR | 166       |
| 928 | TapasinERP57 HETERODIMER   | gi 220702506       | 12                 | 4                      | FLQDYFDGNLK                  | 58        |
|     |                            |                    |                    |                        | ELSDFISYLQR                  | 67        |
|     |                            |                    |                    |                        | SDVLELTDDNFESR               | 88        |
|     |                            |                    |                    |                        | TFSHELSDFGLESTAGEIPVVAIR     | 219       |
| 929 | aldehyde dehydrogenase 1A1 | gi 21361176        | 8                  | 3                      | TIPIDGNFFTYTR                | 87        |
|     |                            |                    |                    |                        | IFVEESIYDEFVR                | 122       |
|     |                            |                    |                    |                        | ELGEYGFHEYTEVK               | 41        |
| 930 | enolase 1 variant          | gi 62896593        | 19                 | 5                      | YISPDQLADLYK                 | 82        |
|     |                            |                    |                    |                        | VVIGMDVAASEFFR               | 63        |
|     |                            |                    |                    |                        | AAVPSGASTGIYEALER            | 158       |
|     |                            |                    |                    |                        | LAMQEFMILPVGAANFR            | 44        |
|     |                            |                    |                    |                        | FTASAGIQVVGDDLTVTNPK         | 136       |
| 931 | Human Serum Albumin        | gi 157830361       | 19                 | 5                      | YLYEIAR                      | 43        |

| No. | Protein description        | NCBI accession no. | Sequence coverage% | Matched peptide number | Peptide sequence              | Ion score |
|-----|----------------------------|--------------------|--------------------|------------------------|-------------------------------|-----------|
|     |                            |                    |                    |                        | FQNALLVR                      | 45        |
|     |                            |                    |                    |                        | KVPQVSTPTLVEVSR               | 43        |
|     |                            |                    |                    |                        | RPCFSALEVDETYVPK              | 69        |
|     |                            |                    |                    |                        | VFDEFKPLVEEPQNLIK             | 116       |
| 932 | unnamed protein product    | gi 189054101       | 10                 | 2                      | QAALQVAEGFISR                 | 69        |
|     |                            |                    |                    |                        | MQYAPNTQVEILPQGHESPIFK        | 53        |
| 933 | heat shock protein 27      | gi 662841          | 13                 | 2                      | LFDQAFGLPR                    | 58        |
|     |                            |                    |                    |                        | LATQSNEITIPVTFESR             | 114       |
| 934 | Triosephosphate isomerase  | gi 999892          | 20                 | 2                      | VPADTEVVCAPPTAYIDFAR          | 165       |
|     |                            |                    |                    |                        | ELASQPDVDGFLVGGASLKPEFVDIINAK | 117       |
| 935 | mutant desmin              | gi 71011128        | 11                 | 4                      | VAELYEEELR                    | 60        |
|     |                            |                    |                    |                        | EEAENNLAAFR                   | 49        |
|     |                            |                    |                    |                        | FASEASGYQDNIAR                | 112       |
|     |                            |                    |                    |                        | FLEQQNAALAAEVNR               | 127       |
| 936 | mitochondrial ATP synthase | gi 89574029        | 17                 | 5                      | AHGGYSVFAGVGER                | 84        |
|     |                            |                    |                    |                        | VALTGLTVAEYFR                 | 51        |

| No. | Protein description                            | NCBI accession no. | Sequence coverage% | Matched peptide number | Peptide sequence          | Ion score |
|-----|------------------------------------------------|--------------------|--------------------|------------------------|---------------------------|-----------|
|     |                                                |                    |                    |                        | LVLEVAQHLGESTVR           | 67        |
|     |                                                |                    |                    |                        | DQEGQDVLLFIDNIFR          | 129       |
|     |                                                |                    |                    |                        | AIAELGIYPAVDPLDSTSR       | 81        |
| 937 | heat shock protein 60                          | gi 77702086        | 14                 | 4                      | AAVEEGIVLGGGCALLR         | 88        |
|     |                                                |                    |                    |                        | ISSIQSIVPALEIANAHR        | 89        |
|     |                                                |                    |                    |                        | KPLVIAEDVDGEALSTLVLR      | 212       |
|     |                                                |                    |                    |                        | LVQDVANNTNEEAGDGTATVLAR   | 92        |
| 938 | TapasinERP57 HETERODIMER                       | gi 220702506       | 8                  | 3                      | FLQDYFDGNLKR              | 39        |
|     |                                                |                    |                    |                        | DLIIAYDVDYK               | 77        |
|     |                                                |                    |                    |                        | SDVLELTDDNFESR            | 83        |
| 939 | heterogeneous nuclear ribonucleoproteins A2/B1 | gi 14043072        | 18                 | 4                      | DYFEEYGK                  | 43        |
|     |                                                |                    |                    |                        | GGGGNFGPGPGSNFR           | 88        |
|     |                                                |                    |                    |                        | LFIGGLSFETTEESLR          | 126       |
|     |                                                |                    |                    |                        | NMGGPYGGGNYGPGSGGGSGGYGGR | 51        |
| 940 | Protein DJ-1                                   | gi 42543006        | 22                 | 2                      | GAEEMETVIPVDVMR           | 59        |

| No. | Protein description                  | NCBI accession no. | Sequence coverage% | Matched peptide number | Peptide sequence           | Ion score |
|-----|--------------------------------------|--------------------|--------------------|------------------------|----------------------------|-----------|
|     |                                      |                    |                    |                        | EGPYDVVVLPGGNLGAQNLSESAAVK | 151       |
| 941 | nucleoside phosphorylase             | gi 157168362       | 21                 | 4                      | FEVGDIMLIR                 | 38        |
|     |                                      |                    |                    |                        | DHINLPGFSGQNPLR            | 44        |
|     |                                      |                    |                    |                        | LGADAVGMSTVPEVIVAR         | 64        |
|     |                                      |                    |                    |                        | LTQAQIFDYGEIPNFPR          | 135       |
| 942 | smooth muscle myosin heavy chain     | gi 36507           | 4                  | 2                      | LQQELDDLWVDLDNQR           | 64        |
|     |                                      |                    |                    |                        | DVASLSSQLQDTQELLQEETR      | 52        |
| 943 | mutant desmin                        | gi 71011128        | 12                 | 4                      | VAELYEEELR                 | 50        |
|     |                                      |                    |                    |                        | FASEASGYQDNIR              | 88        |
|     |                                      |                    |                    |                        | FLEQQNAALAAEVNR            | 110       |
|     |                                      |                    |                    |                        | LQEEIQLKEEAENNLAAFR        | 100       |
| 944 | myosin light polypeptide 6 isoform 1 | gi 17986258        | 10                 | 2                      | DQGTIEDYVEGLR              | 41        |
|     |                                      |                    |                    |                        | NKDQGTIEDYVEGLR            | 37        |
| 945 | Hemoglobin subunit beta              | gi 3660145         | 47                 | 5                      | LHVDPENFR                  | 47        |
|     |                                      |                    |                    |                        | VNVDEVGGALGR               | 45        |
|     |                                      |                    |                    |                        | EFTPPVQAAYQK               | 68        |

| No. | Protein description                       | NCBI accession no. | Sequence coverage% | Matched peptide number | Peptide sequence              | Ion score |
|-----|-------------------------------------------|--------------------|--------------------|------------------------|-------------------------------|-----------|
|     |                                           |                    |                    |                        | VLGAFSDGLAHLNLK               | 100       |
|     |                                           |                    |                    |                        | FFESFGDLSTPDAVMGNPK           | 124       |
| 946 | peptidylprolyl isomerase A                | gi 10863927        | 19                 | 2                      | IIPGFMCQGGDFTR                | 40        |
|     |                                           |                    |                    |                        | VNPTVFFDIAVDGEPLGR            | 140       |
| 947 | neuropolypeptide h3                       | gi 913159          | 19                 | 2                      | LYTLVLTPDAPSR                 | 68        |
|     |                                           |                    |                    |                        | GNDISSGTVLSYVVGSGPPK          | 97        |
| 948 | Hemoglobin subunit alpha                  | gi 37928140        | 42                 | 3                      | VGAHAGEYGAEALER               | 118       |
|     |                                           |                    |                    |                        | TYFPHFDLSHGSAQVK              | 140       |
|     |                                           |                    |                    |                        | VADALTNAVAHVDDMPNALSALSDLHAHK | 61        |
| 949 | Hemoglobin subunit beta                   | gi 61679604        | 27                 | 3                      | LHVDPENFR                     | 51        |
|     |                                           |                    |                    |                        | EFTPPVQAAYQK                  | 42        |
|     |                                           |                    |                    |                        | FFESFGDLSTPDAVMGNPK           | 108       |
| 950 | albumin preproprotein                     | gi 4502027         | 8                  | 3                      | AVMDDFAAFVEK                  | 41        |
|     |                                           |                    |                    |                        | RPCFSALEVDETYVPK              | 81        |
|     |                                           |                    |                    |                        | EFNAETFTFHADICTLSEK           | 41        |
| 951 | heterogeneous nuclear ribonucleoprotein H | gi 5031753         | 7                  | 2                      | HTGPNSPDTANDGFVR              | 42        |



| No. | Protein description              | NCBI accession no. | Sequence coverage% | Matched peptide number | Peptide sequence      | Ion score |
|-----|----------------------------------|--------------------|--------------------|------------------------|-----------------------|-----------|
|     |                                  |                    |                    |                        | STGEAFVQFASQEIAEK     | 77        |
| 952 | ATP5A1 protein                   | gi 13938339        | 10                 | 3                      | EAYPGDVFYLHSR         | 72        |
|     |                                  |                    |                    |                        | QGGYSPMAIEEQVAVIYAGVR | 78        |
|     |                                  |                    |                    |                        | EVAFAQFGSDLDAATQQLSR  | 86        |
| 953 | Hemoglobin subunit beta          | gi 3660145         | 32                 | 3                      | EFTPPVQAAYQK          | 42        |
|     |                                  |                    |                    |                        | VLGAFSDGLAHLNLK       | 67        |
|     |                                  |                    |                    |                        | FFESFGDLSTPDAVMGNPK   | 126       |
| 954 | unnamed protein product          | gi 194388088       | 4                  | 2                      | FEELCSDLFR            | 42        |
|     |                                  |                    |                    |                        | AQIHDLVLVGGSTR        | 68        |
| 955 | fructose-bisphosphate aldolase A | gi 4557305         | 7                  | 2                      | ADDGRPPQVIK           | 51        |
|     |                                  |                    |                    |                        | FSHEEIAMATVTALR       | 42        |
| 956 | Alpha-1-antitrypsin precursor    | gi 28948408        | 18                 | 5                      | GKWERPFEVK            | 48        |
|     |                                  |                    |                    |                        | ITPNLAEFASLYR         | 122       |
|     |                                  |                    |                    |                        | TDTSHHDQDHPTFNK       | 93        |
|     |                                  |                    |                    |                        | DTEEDFHVDQVTTVK       | 57        |
|     |                                  |                    |                    |                        | LYHSEFTVNFQDTEAK      | 152       |

| No. | Protein description       | NCBI accession no. | Sequence coverage% | Matched peptide number | Peptide sequence      | Ion score |
|-----|---------------------------|--------------------|--------------------|------------------------|-----------------------|-----------|
| 957 | antitrypsin alpha1 mutant | gi 224224          | 21                 | 6                      | GKWERPFEVK            | 46        |
|     |                           |                    |                    |                        | ITPNLAEFAPFLYR        | 94        |
|     |                           |                    |                    |                        | LQHLENELTHDIITK       | 110       |
|     |                           |                    |                    |                        | FNKPFVFLMIEQNTK       | 67        |
|     |                           |                    |                    |                        | DTEEDFHVDQVTTVK       | 60        |
|     |                           |                    |                    |                        | LYHSEFTVNFQDTEAK      | 147       |
| 958 | actin, cytoplasmic 2      | gi 4501887         | 24                 | 6                      | GYSFTTTAER            | 66        |
|     |                           |                    |                    |                        | AVFPSIVGRPR           | 63        |
|     |                           |                    |                    |                        | QEYDESGPSIVHR         | 93        |
|     |                           |                    |                    |                        | SYELPDGQVITIGNER      | 150       |
|     |                           |                    |                    |                        | VAPEEHPVLLTEAPLNPK    | 104       |
|     |                           |                    |                    |                        | DLYANTVLSGGTTMYPGIADR | 48        |
| 959 | hypothetical protein      | gi 51476390        | 9                  | 4                      | FQNALLVR              | 41        |
|     |                           |                    |                    |                        | AVMDDFAAFVEK          | 40        |
|     |                           |                    |                    |                        | KVPQVSTPTLVEVSR       | 67        |
|     |                           |                    |                    |                        | VFDEFKPLVEEPQNLIK     | 81        |

| No. | Protein description                   | NCBI<br>accession no. | Sequence<br>coverage% | Matched peptide<br>number | Peptide sequence    | Ion score |
|-----|---------------------------------------|-----------------------|-----------------------|---------------------------|---------------------|-----------|
| 960 | hypothetical protein                  | gi 51476390           | 15                    | 7                         | YLVEIAR             | 44        |
|     |                                       |                       |                       |                           | FQNALLVR            | 45        |
|     |                                       |                       |                       |                           | LVNEVTEFAK          | 43        |
|     |                                       |                       |                       |                           | KVPQVSTPTLVEVSR     | 68        |
|     |                                       |                       |                       |                           | RPCFSALEVDETYVPK    | 76        |
|     |                                       |                       |                       |                           | VFDEFKPLVEEPQNLIK   | 115       |
|     |                                       |                       |                       |                           | EFNAETFTFHADICTLSEK | 68        |
| 961 | antitrypsin alpha1 mutant             | gi 224224             | 19                    | 5                         | ITPNLAEFASFSLYR     | 112       |
|     |                                       |                       |                       |                           | LQHLENELTHDIITK     | 83        |
|     |                                       |                       |                       |                           | FNKPFVFLMIEQNTK     | 77        |
|     |                                       |                       |                       |                           | DTEEEDFHVDQVTTVK    | 62        |
|     |                                       |                       |                       |                           | LYHSEAFVNFVGDTEEAK  | 145       |
| 962 | Horf6 A Novel Human Peroxidase Enzyme | gi 3318841            | 30                    | 5                         | LPFPIIDDR           | 74        |
|     |                                       |                       |                       |                           | VVFVFGPDKK          | 38        |
|     |                                       |                       |                       |                           | LSILYPATTGR         | 38        |
|     |                                       |                       |                       |                           | ELAILLGMLDPAEKDEK   | 38        |

| No. | Protein description         | NCBI accession no. | Sequence coverage% | Matched peptide number | Peptide sequence      | Ion score |
|-----|-----------------------------|--------------------|--------------------|------------------------|-----------------------|-----------|
|     |                             |                    |                    |                        | PGGLLLGDVAPNFEANTTVGR | 174       |
| 963 | unnamed protein product     | gi 16552261        | 17                 | 5                      | KVESLQEEIAFLK         | 46        |
|     |                             |                    |                    |                        | ISLPLPNFSSLNLR        | 77        |
|     |                             |                    |                    |                        | TNEKVELQELNDR         | 110       |
|     |                             |                    |                    |                        | LLQDSVDFSLADAINTEFK   | 116       |
|     |                             |                    |                    |                        | EMEENFAVEAANYQDTIGR   | 103       |
| 964 | KRT8 protein                | gi 62913980        | 10                 | 3                      | LSELEAALQR            | 42        |
|     |                             |                    |                    |                        | ASLEAAIADAEQR         | 69        |
|     |                             |                    |                    |                        | LEGLTDEINFLR          | 89        |
| 965 | hypothetical protein        | gi 51476390        | 13                 | 6                      | FQNALLVR              | 40        |
|     |                             |                    |                    |                        | LVNEVTEFAK            | 43        |
|     |                             |                    |                    |                        | AVMDDFAAFVEK          | 55        |
|     |                             |                    |                    |                        | KVPQVSTPTLVEVSR       | 61        |
|     |                             |                    |                    |                        | RPCFSALEVDETYVPK      | 43        |
|     |                             |                    |                    |                        | VFDEFKPLVEEPQQLIK     | 106       |
| 966 | Alpha-1-acid glycoprotein 1 | gi 112877          | 11                 | 2                      | TEDTIFLR              | 44        |

| No. | Protein description          | NCBI accession no. | Sequence coverage% | Matched peptide number | Peptide sequence  | Ion score |
|-----|------------------------------|--------------------|--------------------|------------------------|-------------------|-----------|
|     |                              |                    |                    |                        | YVGGQEHAHLLLR     | 106       |
| 967 | Apolipoprotein A-I precursor | gi 90108664        | 22                 | 5                      | AKPALEDLR         | 59        |
|     |                              |                    |                    |                        | DEPPQSPWDR        | 55        |
|     |                              |                    |                    |                        | THLAPYDELRL       | 74        |
|     |                              |                    |                    |                        | VSFLSALEEYTK      | 59        |
|     |                              |                    |                    |                        | DSGRDYVSQFEGSALGK | 115       |
| 968 | Apolipoprotein A-I precursor | gi 90108664        | 17                 | 4                      | DEPPQSPWDR        | 48        |
|     |                              |                    |                    |                        | THLAPYDELRL       | 76        |
|     |                              |                    |                    |                        | VSFLSALEEYTK      | 74        |
|     |                              |                    |                    |                        | DYVSQFEGSALGK     | 100       |
| 969 | beta tropomyosin             | gi 6573280         | 7                  | 2                      | IQLVEEELDR        | 71        |
|     |                              |                    |                    |                        | KLVILEGELER       | 93        |
| 970 | unnamed protein product      | gi 28590           | 5                  | 2                      | RHPDYSVLLLLR      | 37        |
|     |                              |                    |                    |                        | VFDEFKPLVEEPQNLIK | 100       |
| 971 | Tubulin, beta 2C             | gi 23958133        | 20                 | 6                      | IREEYPDR          | 37        |
|     |                              |                    |                    |                        | FPGQLNADLR        | 93        |

| No. | Protein description          | NCBI accession no. | Sequence coverage% | Matched peptide number | Peptide sequence           | Ion score |
|-----|------------------------------|--------------------|--------------------|------------------------|----------------------------|-----------|
|     |                              |                    |                    |                        | INVYYNEATGGK               | 63        |
|     |                              |                    |                    |                        | AVLVDLEPGTMDSVR            | 37        |
|     |                              |                    |                    |                        | GHYTEGAELVDSVLDVVR         | 174       |
|     |                              |                    |                    |                        | FWEVISDEHGIDPTGTYHGSDQLER  | 99        |
| 972 | Aldehyde Reductase           | gi 157834561       | 20                 | 4                      | GLVQALGLSNFNSR             | 102       |
|     |                              |                    |                    |                        | DAGHPLYPFNDPY              | 37        |
|     |                              |                    |                    |                        | GLEVTAYSPLGSSDR            | 116       |
|     |                              |                    |                    |                        | AWRDPDEPVLLLEPVVLALAEK     | 73        |
| 973 | TapasinERP57 HETERODIMER     | gi 220702506       | 13                 | 4                      | LAPEYEAATR                 | 66        |
|     |                              |                    |                    |                        | DLLIAYYVDYK                | 68        |
|     |                              |                    |                    |                        | SDVLELTDNDFESR             | 100       |
|     |                              |                    |                    |                        | FISDKDASIVGFFDDSFSEAHSEFLK | 113       |
| 974 | Human Muscle Pyruvate Kinase | gi 67464392        | 15                 | 5                      | LDIDSPITAR                 | 54        |
|     |                              |                    |                    |                        | IYVDDGLISLQVK              | 68        |
|     |                              |                    |                    |                        | GADFLVTEVENGSLGSK          | 41        |
|     |                              |                    |                    |                        | FGVEQDVMVFASFIR            | 63        |

| No. | Protein description                                 | NCBI accession no. | Sequence coverage% | Matched peptide number | Peptide sequence          | Ion score |
|-----|-----------------------------------------------------|--------------------|--------------------|------------------------|---------------------------|-----------|
|     |                                                     |                    |                    |                        | TATESFASDPILYRPVAVALDTK   | 98        |
| 975 | N(G),N(G)-dimethylarginine dimethylaminohydrolase 1 | gi 134104755       | 17                 | 3                      | ALPESLGQHALR              | 47        |
|     |                                                     |                    |                    |                        | QHQLYVGVLGSK              | 48        |
|     |                                                     |                    |                    |                        | LQLNIVEMKDENATLDGGDVLFTGR | 46        |
| 976 | Protein DJ-1                                        | gi 42543006        | 24                 | 2                      | GPGTSFEFALAIVEALNGK       | 89        |
|     |                                                     |                    |                    |                        | EGPYDVVVLPGGNLGAQNLSESAVK | 99        |
| 977 | unnamed protein product                             | gi 37403           | 13                 | 4                      | IQLVEEELDR                | 69        |
|     |                                                     |                    |                    |                        | KLVIIEGDLER               | 68        |
|     |                                                     |                    |                    |                        | IQVLQQQADDAEER            | 76        |
|     |                                                     |                    |                    |                        | KIQVLQQQADDAEER           | 106       |
| 978 | unnamed protein product                             | gi 16552261        | 7                  | 2                      | ISLPLPNFSSLNLR            | 87        |
|     |                                                     |                    |                    |                        | EMEENFAVEAANYQDTIGR       | 94        |
| 979 | serine proteinase inhibitor, clade A, member 1      | gi 50363217        | 14                 | 4                      | GKWERPFEVK                | 42        |
|     |                                                     |                    |                    |                        | ITPNLAEFASFLYR            | 91        |

| No. | Protein description                    | NCBI accession no. | Sequence coverage% | Matched peptide number | Peptide sequence    | Ion score |
|-----|----------------------------------------|--------------------|--------------------|------------------------|---------------------|-----------|
|     |                                        |                    |                    |                        | ELDRDTVFALVNYIFFK   | 91        |
|     |                                        |                    |                    |                        | LYHSEFTVNFQDTEAK    | 95        |
| 980 | beta tropomyosin                       | gi 6573280         | 12                 | 3                      | IQLVEEELDR          | 81        |
|     |                                        |                    |                    |                        | KLVILEGELER         | 102       |
|     |                                        |                    |                    |                        | IQLVEEELDRAQER      | 64        |
| 981 | Human Serum Albumin                    | gi 157830361       | 13                 | 3                      | FQNALLVR            | 52        |
|     |                                        |                    |                    |                        | RPCFSALEVDETYVPK    | 74        |
|     |                                        |                    |                    |                        | VFDEFKPLVEEPQNLIK   | 97        |
| 982 | tropomyosin 2 (beta) isoform 2 variant | gi 62898077        | 23                 | 5                      | LVILEGELER          | 61        |
|     |                                        |                    |                    |                        | IQLVEEELDR          | 83        |
|     |                                        |                    |                    |                        | KLVILEGELER         | 102       |
|     |                                        |                    |                    |                        | IQLVEEELDRAQER      | 64        |
|     |                                        |                    |                    |                        | EENVEIHQTLTDLLELNNL | 148       |
| 983 | heat shock protein 27                  | gi 662841          | 30                 | 6                      | VPFSLLR             | 37        |
|     |                                        |                    |                    |                        | RVPFSLLR            | 38        |
|     |                                        |                    |                    |                        | QLSSGVSEIR          | 84        |



| No. | Protein description     | NCBI accession no. | Sequence coverage% | Matched peptide number | Peptide sequence    | Ion score |
|-----|-------------------------|--------------------|--------------------|------------------------|---------------------|-----------|
|     |                         |                    |                    |                        | LFDQAFGLPR          | 97        |
|     |                         |                    |                    |                        | VSLDVNHFAPDELTVK    | 120       |
|     |                         |                    |                    |                        | LATQSNEITIPVTFESR   | 149       |
| 984 | Human Serum Albumin     | gi 157830361       | 25                 | 6                      | FQNALLVR            | 45        |
|     |                         |                    |                    |                        | AVMDDFAAFVEK        | 56        |
|     |                         |                    |                    |                        | RHPDYSVLLLLR        | 72        |
|     |                         |                    |                    |                        | KVPQVSTPTLVEVSR     | 67        |
|     |                         |                    |                    |                        | RPCFSALEVDETYVPK    | 134       |
|     |                         |                    |                    |                        | VFDEFKPLVEEPQQLIK   | 106       |
| 985 | hypothetical protein    | gi 51476390        | 5                  | 3                      | YLVEIAR             | 43        |
|     |                         |                    |                    |                        | LVNEVTEFAK          | 47        |
|     |                         |                    |                    |                        | QEPERNECFLQHK       | 63        |
| 986 | unnamed protein product | gi 16552261        | 12                 | 4                      | EEAENTLQSFR         | 48        |
|     |                         |                    |                    |                        | KVESLQEEIAFLK       | 75        |
|     |                         |                    |                    |                        | ISLPLPNFSSLNLR      | 88        |
|     |                         |                    |                    |                        | EMEENFAVEAANYQDTIGR | 138       |

| No. | Protein description         | NCBI accession no. | Sequence coverage% | Matched peptide number | Peptide sequence    | Ion score |
|-----|-----------------------------|--------------------|--------------------|------------------------|---------------------|-----------|
| 987 | Alpha-1-acid glycoprotein 1 | gi 112877          | 14                 | 2                      | EQLGEFYEALDCLR      | 59        |
|     |                             |                    |                    |                        | YVGGQEHFHALLILR     | 96        |
| 988 | Tubulin, beta 2C            | gi 23958133        | 7                  | 2                      | AVLVDLEPGTMDSVR     | 39        |
|     |                             |                    |                    |                        | GHYTEGAELVDSVLDVVR  | 171       |
| 989 | albumin preproprotein       | gi 4502027         | 3                  | 2                      | YLYEIAR             | 45        |
|     |                             |                    |                    |                        | QEPERNECFQHK        | 39        |
| 990 | unnamed protein product     | gi 28590           | 5                  | 3                      | LVNEVTEFAK          | 56        |
|     |                             |                    |                    |                        | FKDLGEEENFK         | 58        |
|     |                             |                    |                    |                        | HPDYSVVLLLR         | 52        |
| 991 | ALB protein                 | gi 23241675        | 10                 | 3                      | FQNALLVR            | 38        |
|     |                             |                    |                    |                        | KVPQVSTPTLVEVSR     | 81        |
|     |                             |                    |                    |                        | VFDEFKPLVEEPQNLIK   | 100       |
| 992 | antitrypsin alpha1 mutant   | gi 224224          | 8                  | 2                      | LQHLENELTHDIITK     | 112       |
|     |                             |                    |                    |                        | VFSNGADLSGVTEEAPLK  | 106       |
| 993 | beta globin chain           | gi 66473265        | 33                 | 2                      | VLGAFSDGLAHLDNLK    | 66        |
|     |                             |                    |                    |                        | FFESFGDLSTPDAVMGNPK | 99        |

| No.  | Protein description       | NCBI accession no. | Sequence coverage% | Matched peptide number | Peptide sequence              | Ion score |
|------|---------------------------|--------------------|--------------------|------------------------|-------------------------------|-----------|
| 994  | hypothetical protein      | gi 51476390        | 5                  | 2                      | YICENQDSISSK                  | 55        |
|      |                           |                    |                    |                        | VHTECCHGDLLECADDR             | 97        |
| 995  | albumin preproprotein     | gi 4502027         | 3                  | 2                      | YLYEIAR                       | 37        |
|      |                           |                    |                    |                        | HPYFYAPELLFFAK                | 77        |
| 996  | hypothetical protein      | gi 51476390        | 6                  | 3                      | LVNEVTEFAK                    | 65        |
|      |                           |                    |                    |                        | FKDLGEENFK                    | 69        |
|      |                           |                    |                    |                        | RPCFSALEVDETYVPK              | 39        |
| 997  | Tubulin, beta 2C          | gi 23958133        | 7                  | 2                      | INVYYNEATGGK                  | 43        |
|      |                           |                    |                    |                        | GHYTEGAELVDSVLDVVR            | 170       |
| 998  | Triosephosphate isomerase | gi 999892          | 17                 | 2                      | HVFGESDELIGQK                 | 69        |
|      |                           |                    |                    |                        | ELASQPDVDGFLVGGASLKPEFVDIINAK | 86        |
| 999  | Triosephosphate isomerase | gi 999892          | 17                 | 2                      | HVFGESDELIGQK                 | 92        |
|      |                           |                    |                    |                        | ELASQPDVDGFLVGGASLKPEFVDIINAK | 92        |
| 1000 | albumin preproprotein     | gi 4502027         | 8                  | 3                      | AVMDDFAAFVEK                  | 54        |
|      |                           |                    |                    |                        | RPCFSALEVDETYVPK              | 96        |
|      |                           |                    |                    |                        | EFNAETFTFHADICTLSEK           | 102       |

| No.  | Protein description              | NCBI accession no. | Sequence coverage% | Matched peptide number | Peptide sequence                    | Ion score |
|------|----------------------------------|--------------------|--------------------|------------------------|-------------------------------------|-----------|
| 1001 | mammary-derived growth inhibitor | gi 1869803         | 18                 | 3                      | WDGQETTLVR                          | 72        |
|      |                                  |                    |                    |                        | LGVEFDETTADDR                       | 101       |
|      |                                  |                    |                    |                        | LGVEFDETTADDRK                      | 64        |
| 1002 | hypothetical protein             | gi 51476390        | 4                  | 3                      | YLYEIAR                             | 42        |
|      |                                  |                    |                    |                        | LVNEVTEFAK                          | 54        |
|      |                                  |                    |                    |                        | FKDLGEENFK                          | 65        |
| 1003 | hypothetical protein             | gi 31873324        | 6                  | 2                      | FKDIFQEIYDK                         | 57        |
|      |                                  |                    |                    |                        | SDYLNTFEFMDK                        | 52        |
| 1004 | Transthyretin precursor          | gi 2098257         | 68                 | 6                      | GSPAINVAVHVFR                       | 96        |
|      |                                  |                    |                    |                        | AADDTWEPFASGK                       | 79        |
|      |                                  |                    |                    |                        | KAADDTWEPFASGK                      | 74        |
|      |                                  |                    |                    |                        | YTIAALLSPYSYSTTAVVTNPK              | 153       |
|      |                                  |                    |                    |                        | ALGISPFHEHAEEVFTANDSGPR             | 133       |
|      |                                  |                    |                    |                        | TSESGELHGLTTEEEFVEGIYKVEIDTK        | 102       |
| 1005 | Superoxide dismutase [Cu-Zn]     | gi 31615344        | 32                 | 2                      | GDGPVQGIINFEQK                      | 94        |
|      |                                  |                    |                    |                        | HVGDLGNVTADKDGADVSIEDSVISLSGDHCIIGR | 93        |

| No.  | Protein description            | NCBI accession no. | Sequence coverage% | Matched peptide number | Peptide sequence    | Ion score |
|------|--------------------------------|--------------------|--------------------|------------------------|---------------------|-----------|
| 1006 | albumin preproprotein          | gi 4502027         | 6                  | 2                      | RPCFSALEVDETYVPK    | 88        |
|      |                                |                    |                    |                        | EFNAETFTFHADICTLSEK | 99        |
| 1007 | ALB protein                    | gi 23241675        | 22                 | 6                      | FQNALLVR            | 64        |
|      |                                |                    |                    |                        | AVMDDFAAFVEK        | 78        |
|      |                                |                    |                    |                        | KVPQVSTPTLVEVSR     | 104       |
|      |                                |                    |                    |                        | RPCFSALEVDETYVPK    | 79        |
|      |                                |                    |                    |                        | VFDEFKPLVEEPQNLIK   | 108       |
|      |                                |                    |                    |                        | EFNAETFTFHADICTLSEK | 84        |
| 1008 | calreticulin precursor variant | gi 62897681        | 6                  | 2                      | EQFLDGDGWTSR        | 110       |
|      |                                |                    |                    |                        | FYALSASFEPFSNK      | 72        |
| 1009 | antitrypsin alpha1 mutant      | gi 224224          | 11                 | 3                      | LQHLENELTHDIITK     | 71        |
|      |                                |                    |                    |                        | VFSNGADLSGVTEEAPLK  | 117       |
|      |                                |                    |                    |                        | FNKPFVFLMIEQNTK     | 55        |
| 1010 | peroxiredoxin-2 isoform a      | gi 32189392        | 15                 | 3                      | QITVNDLPVGR         | 68        |
|      |                                |                    |                    |                        | EGGLGPLNIPLLADVTR   | 138       |
|      |                                |                    |                    |                        | KEGGLGPLNIPLLADVTR  | 166       |

| No.  | Protein description                            | NCBI accession no. | Sequence coverage% | Matched peptide number | Peptide sequence              | Ion score |
|------|------------------------------------------------|--------------------|--------------------|------------------------|-------------------------------|-----------|
| 1011 | TAGLN                                          | gi 49168456        | 14                 | 2                      | KYDEELEER                     | 43        |
|      |                                                |                    |                    |                        | TDMFQTVDLFEGKDMAAVQR          | 43        |
| 1012 | Horf6 A Novel Human Peroxidase Enzyme          | gi 3318841         | 29                 | 5                      | NFDEILR                       | 37        |
|      |                                                |                    |                    |                        | LPFPIIDDR                     | 73        |
|      |                                                |                    |                    |                        | LSILYPATTGR                   | 66        |
|      |                                                |                    |                    |                        | ELAILLGMLDPAEKDEK             | 82        |
|      |                                                |                    |                    |                        | PGGLLLGDVAPNFEANTTVGR         | 169       |
| 1013 | serine proteinase inhibitor, clade A, member 1 | gi 50363217        | 8                  | 3                      | DTEEEDFHVDQVTTVK              | 86        |
|      |                                                |                    |                    |                        | LYHSEAFVNFVGDTEEAK            | 98        |
|      |                                                |                    |                    |                        | LYHSEAFVNFVGDTEEAK            | 132       |
| 1014 | Triosephosphate isomerase                      | gi 999892          | 25                 | 3                      | DCGATWVVLGHSER                | 135       |
|      |                                                |                    |                    |                        | VPADTEVVCAPPTAYIDFAR          | 144       |
|      |                                                |                    |                    |                        | ELASQPDVDGFLVGGASLKPEFVDIINAK | 106       |
| 1015 | albumin preproprotein                          | gi 4502027         | 3                  | 2                      | YLYEIAR                       | 41        |
|      |                                                |                    |                    |                        | HPYFYAPELFFAK                 | 99        |

| No.  | Protein description                 | NCBI accession no. | Sequence coverage% | Matched peptide number | Peptide sequence              | Ion score |
|------|-------------------------------------|--------------------|--------------------|------------------------|-------------------------------|-----------|
| 1016 | TAGLN                               | gi 49168456        | 19                 | 4                      | KYDEELEER                     | 66        |
|      |                                     |                    |                    |                        | QMEQVAQFLK                    | 39        |
|      |                                     |                    |                    |                        | TDMFQTVDLFEGK                 | 69        |
|      |                                     |                    |                    |                        | TDMFQTVDLFEGKDMAAVQR          | 50        |
| 1017 | Triosephosphate isomerase           | gi 999892          | 17                 | 2                      | HVFGESDELIGQK                 | 90        |
|      |                                     |                    |                    |                        | ELASQPDVDGFLVGGASLKPEFVDIINAK | 64        |
| 1018 | Heat-Shock 70kd Protein 42kd Atpase | gi 6729803         | 12                 | 6                      | DAGVIAGLNVLR                  | 99        |
|      |                                     |                    |                    |                        | VEIANDQGNR                    | 69        |
|      |                                     |                    |                    |                        | LVNHFVEEFKR                   | 84        |
|      |                                     |                    |                    |                        | TTPSYVAFTDTER                 | 128       |
|      |                                     |                    |                    |                        | ATAGDTHLGGEDFDNR              | 79        |
|      |                                     |                    |                    |                        | IINEPTAAAIAYGLDR              | 63        |
| 1019 | albumin preproprotein               | gi 4502027         | 8                  | 3                      | AVMDDFAAFVEK                  | 70        |
|      |                                     |                    |                    |                        | RPCFSALEVDETYVPK              | 90        |
|      |                                     |                    |                    |                        | EFNAETTFHADICTLSEK            | 86        |
| 1020 | albumin preproprotein               | gi 4502027         | 5                  | 2                      | AVMDDFAAFVEK                  | 54        |

| No.  | Protein description         | NCBI accession no. | Sequence coverage% | Matched peptide number | Peptide sequence          | Ion score |
|------|-----------------------------|--------------------|--------------------|------------------------|---------------------------|-----------|
|      |                             |                    |                    |                        | EFNAETFFHADICTLSEK        | 117       |
| 1021 | albumin preproprotein       | gi 4502027         | 6                  | 2                      | RPCFSALEVDETYVPK          | 111       |
|      |                             |                    |                    |                        | EFNAETFFHADICTLSEK        | 71        |
| 1022 | protein disulfide isomerase | gi 860986          | 15                 | 6                      | GFPTIYFSPANK              | 48        |
|      |                             |                    |                    |                        | ELSDFISYLQR               | 80        |
|      |                             |                    |                    |                        | FLQDYFDGNLKR              | 67        |
|      |                             |                    |                    |                        | MDATANDVSPYEVK            | 72        |
|      |                             |                    |                    |                        | TFSHELSDFGLESTAGEIPVVAIR  | 238       |
|      |                             |                    |                    |                        | KTFSHELSDFGLESTAGEIPVVAIR | 190       |
| 1023 | albumin preproprotein       | gi 4502027         | 6                  | 2                      | RPCFSALEVDETYVPK          | 114       |
|      |                             |                    |                    |                        | EFNAETFFHADICTLSEK        | 128       |
| 1024 | TAGLN                       | gi 49168456        | 23                 | 3                      | KYDEELEER                 | 49        |
|      |                             |                    |                    |                        | LVEWIIVQCGPDVGRPDR        | 45        |
|      |                             |                    |                    |                        | TDMFQTVDLFEGKDMAAVQR      | 61        |
| 1025 | Protein DJ-1                | gi 42543006        | 32                 | 3                      | GAEEMETVIPVDVMR           | 54        |
|      |                             |                    |                    |                        | GPGTSFEFALAIVEALNGK       | 66        |



| No.  | Protein description          | NCBI accession no. | Sequence coverage% | Matched peptide number | Peptide sequence           | Ion score |
|------|------------------------------|--------------------|--------------------|------------------------|----------------------------|-----------|
|      |                              |                    |                    |                        | EGPYDVVVLPGGNLGAQNLSESAAVK | 149       |
| 1026 | albumin preproprotein        | gi 4502027         | 8                  | 3                      | AVMDDFAAFVEK               | 69        |
|      |                              |                    |                    |                        | RPCFSALEVDETYVPK           | 56        |
|      |                              |                    |                    |                        | EFNAETFTFHADICTLSEK        | 74        |
| 1027 | TapasinERP57 HETERODIMER     | gi 220702506       | 15                 | 5                      | ELSDFISYLQR                | 88        |
|      |                              |                    |                    |                        | FLQDYFDGNLKR               | 47        |
|      |                              |                    |                    |                        | DLLIAYYDVDYEK              | 43        |
|      |                              |                    |                    |                        | SDVLELTDDNFESR             | 47        |
|      |                              |                    |                    |                        | KTFSHLSDFGLESTAGEIPVVAIR   | 117       |
| 1028 | Apolipoprotein A-I precursor | gi 90108664        | 22                 | 5                      | AKPALEDLR                  | 48        |
|      |                              |                    |                    |                        | DEPPQSPWDR                 | 57        |
|      |                              |                    |                    |                        | THLAPYSDELK                | 80        |
|      |                              |                    |                    |                        | VSFLSALEEYTK               | 47        |
|      |                              |                    |                    |                        | LREQLGPVTQEFWDNLEK         | 74        |
| 1029 | aldehyde dehydrogenase 1     | gi 2183299         | 7                  | 3                      | QAFQIGSPWR                 | 43        |
|      |                              |                    |                    |                        | TIPIDGNFFTYTR              | 72        |

| No.  | Protein description                | NCBI accession no. | Sequence coverage% | Matched peptide number | Peptide sequence    | Ion score |
|------|------------------------------------|--------------------|--------------------|------------------------|---------------------|-----------|
|      |                                    |                    |                    |                        | IFVEESYDEFVR        | 92        |
| 1030 | 6-phosphogluconolactonase          | gi 6912586         | 17                 | 3                      | VTLTLPVLNAAR        | 43        |
|      |                                    |                    |                    |                        | ELPAAVAPAGPASLAR    | 112       |
|      |                                    |                    |                    |                        | LVPFDHAESTYGLYR     | 84        |
| 1031 | aldehyde dehydrogenase 1           | gi 2183299         | 10                 | 4                      | QAFQIGSPWR          | 60        |
|      |                                    |                    |                    |                        | TIPIDGNFFTYTR       | 94        |
|      |                                    |                    |                    |                        | IFVEESYDEFVR        | 92        |
|      |                                    |                    |                    |                        | ELGEYGFHEYTEVK      | 42        |
| 1032 | hypothetical protein               | gi 31873302        | 14                 | 5                      | YISPDQLADLYK        | 73        |
|      |                                    |                    |                    |                        | VVIGMDVAASEFFR      | 81        |
|      |                                    |                    |                    |                        | VVIGMDVAASEFFR      | 60        |
|      |                                    |                    |                    |                        | AAVPSGASTGIYEALELR  | 169       |
|      |                                    |                    |                    |                        | LAMQEFMILPVGAANFR   | 54        |
| 1033 | unnamed protein product            | gi 16552261        | 7                  | 2                      | ISLPLPNFSSLNLR      | 62        |
|      |                                    |                    |                    |                        | EMEENFAVEAANYQDTIGR | 94        |
| 1034 | TPM4-ALK fusion oncoprotein type 2 | gi 10441386        | 19                 | 5                      | LVILEGELER          | 62        |

| No.  | Protein description    | NCBI accession no. | Sequence coverage% | Matched peptide number | Peptide sequence   | Ion score |
|------|------------------------|--------------------|--------------------|------------------------|--------------------|-----------|
|      |                        |                    |                    |                        | IQLVEEELDR         | 73        |
|      |                        |                    |                    |                        | KLVILEGELER        | 102       |
|      |                        |                    |                    |                        | IQALQQQADEAEDR     | 94        |
|      |                        |                    |                    |                        | KIQALQQQADEAEDR    | 74        |
| 1035 | albumin preproprotein  | gi 4502027         | 5                  | 2                      | AVMDDFAAFVEK       | 68        |
|      |                        |                    |                    |                        | EFNAETTFHADICTLSEK | 68        |
| 1036 | Human Serum Albumin    | gi 157830361       | 21                 | 5                      | FQNALLVR           | 51        |
|      |                        |                    |                    |                        | AVMDDFAAFVEK       | 54        |
|      |                        |                    |                    |                        | KVPQVSTPTLVEVSR    | 86        |
|      |                        |                    |                    |                        | RPCFSALEVDETYVPK   | 56        |
|      |                        |                    |                    |                        | VFDEFKPLVEEPQNLIK  | 104       |
| 1037 | albumin, isoform CRA_n | gi 119626077       | 35                 | 6                      | YLVEIAR            | 48        |
|      |                        |                    |                    |                        | LVNEVTEFAK         | 76        |
|      |                        |                    |                    |                        | QEPERNECFLQHK      | 83        |
|      |                        |                    |                    |                        | HPYFYAPPELLFFAK    | 102       |
|      |                        |                    |                    |                        | RHPYFYAPPELLFFAK   | 84        |

| No.  | Protein description      | NCBI accession no. | Sequence coverage% | Matched peptide number | Peptide sequence          | Ion score |
|------|--------------------------|--------------------|--------------------|------------------------|---------------------------|-----------|
|      |                          |                    |                    |                        | ALVLIAFAQYLQQCPFEDHVK     | 119       |
| 1038 | Transferrin              | gi 37747855        | 8                  | 4                      | EGYYGYTGAFR               | 87        |
|      |                          |                    |                    |                        | KPVEEYANCHLAR             | 64        |
|      |                          |                    |                    |                        | EDPQTFYYAVAVVK            | 69        |
|      |                          |                    |                    |                        | NLNEKDYELLCLDGTR          | 102       |
| 1039 | albumin preproprotein    | gi 4502027         | 4                  | 6                      | RHPDYSVLLLLR              | 59        |
|      |                          |                    |                    |                        | DVFLGMFLYEYAR             | 71        |
|      |                          |                    |                    |                        | DVFLGMFLYEYAR             | 66        |
|      |                          |                    |                    |                        | RPCFSALEVDETYVPK          | 80        |
|      |                          |                    |                    |                        | VFDEFKPLVEEPQNLIK         | 104       |
|      |                          |                    |                    |                        | EFNAETFTFHADICTLSEK       | 46        |
| 1040 | TapasinERP57 HETERODIMER | gi 220702506       | 12                 | 5                      | ELSDFISYLQR               | 62        |
|      |                          |                    |                    |                        | FLQDYFDGNLKR              | 78        |
|      |                          |                    |                    |                        | SDVLELTDDNFESR            | 58        |
|      |                          |                    |                    |                        | TFSHELSDFGLESTAGEIPVVAIR  | 160       |
|      |                          |                    |                    |                        | KTFSHELSDFGLESTAGEIPVVAIR | 180       |

| No.  | Protein description  | NCBI accession no. | Sequence coverage% | Matched peptide number | Peptide sequence    | Ion score |
|------|----------------------|--------------------|--------------------|------------------------|---------------------|-----------|
| 1041 | LAP3                 | gi 48146373        | 14                 | 5                      | TLIEFLLR            | 41        |
|      |                      |                    |                    |                        | GVLFASGQNLAR        | 60        |
|      |                      |                    |                    |                        | GSDEPPVFLEIHYK      | 83        |
|      |                      |                    |                    |                        | TFYGLHQDFPSVVLVGLGK | 60        |
|      |                      |                    |                    |                        | AAGIDEQENWHEGKENIR  | 85        |
| 1042 | Human Serum Albumin  | gi 157830361       | 9                  | 2                      | RHPDYSVLLLLR        | 39        |
|      |                      |                    |                    |                        | VFDEFKPLVEEPQNLIK   | 63        |
| 1043 | hypothetical protein | gi 51476390        | 9                  | 5                      | YLIEIAR             | 45        |
|      |                      |                    |                    |                        | LVNEVTEFAK          | 61        |
|      |                      |                    |                    |                        | FKDLGEENFK          | 56        |
|      |                      |                    |                    |                        | QEPERNECFLQHK       | 54        |
|      |                      |                    |                    |                        | HPYFYAPPELLFFAK     | 105       |
| 1044 | Human Serum Albumin  | gi 168988718       | 12                 | 6                      | YLIEIAR             | 45        |
|      |                      |                    |                    |                        | LVNEVTEFAK          | 64        |
|      |                      |                    |                    |                        | FKDLGEENFK          | 71        |
|      |                      |                    |                    |                        | QEPERNECFLQHK       | 80        |

| No.  | Protein description    | NCBI accession no. | Sequence coverage% | Matched peptide number | Peptide sequence      | Ion score |
|------|------------------------|--------------------|--------------------|------------------------|-----------------------|-----------|
|      |                        |                    |                    |                        | HPYFYAPELLFFAK        | 108       |
|      |                        |                    |                    |                        | ALVLIAFAQYLQQCPFEDHVK | 120       |
| 1045 | albumin, isoform CRA_t | gi 119626083       | 9                  | 5                      | FQNALLVR              | 47        |
|      |                        |                    |                    |                        | HPDYSVLLLLR           | 98        |
|      |                        |                    |                    |                        | RHPDYSVLLLLR          | 58        |
|      |                        |                    |                    |                        | KVPQVSTPTLVEVSR       | 64        |
|      |                        |                    |                    |                        | VFDEFKPLVEEPQNLIK     | 105       |
| 1046 | hypothetical protein   | gi 51476390        | 9                  | 5                      | YLVEIAR               | 45        |
|      |                        |                    |                    |                        | LVNEVTEFAK            | 55        |
|      |                        |                    |                    |                        | FKDLGEENFK            | 55        |
|      |                        |                    |                    |                        | QEPERNECFLQHK         | 47        |
|      |                        |                    |                    |                        | HPYFYAPELLFFAK        | 89        |
| 1047 | albumin, isoform CRA_n | gi 119626077       | 13                 | 6                      | YLVEIAR               | 44        |
|      |                        |                    |                    |                        | LVNEVTEFAK            | 85        |
|      |                        |                    |                    |                        | QEPERNECFLQHK         | 89        |
|      |                        |                    |                    |                        | HPYFYAPELLFFAK        | 101       |

| No.  | Protein description              | NCBI accession no. | Sequence coverage% | Matched peptide number | Peptide sequence      | Ion score |
|------|----------------------------------|--------------------|--------------------|------------------------|-----------------------|-----------|
|      |                                  |                    |                    |                        | RHPYFYAPPELLFFAK      | 73        |
|      |                                  |                    |                    |                        | ALVLIAFAQYLQQCPFEDHVK | 132       |
| 1048 | albumin preproprotein            | gi 4502027         | 7                  | 4                      | HPDYSVLLLLR           | 63        |
|      |                                  |                    |                    |                        | DVFLGMFLYEYAR         | 63        |
|      |                                  |                    |                    |                        | DVFLGMFLYEYAR         | 53        |
|      |                                  |                    |                    |                        | VFDEFKPLVEEPQNLIK     | 80        |
| 1049 | albumin, isoform CRA_t           | gi 119626083       | 9                  | 4                      | FQNALLVR              | 48        |
|      |                                  |                    |                    |                        | HPDYSVLLLLR           | 67        |
|      |                                  |                    |                    |                        | KVPQVSTPTLVEVSR       | 67        |
|      |                                  |                    |                    |                        | VFDEFKPLVEEPQNLIK     | 114       |
| 1050 | 78 kDa glucose-regulated protein | gi 16507237        | 9                  | 4                      | TWNDPSVQQDIK          | 65        |
|      |                                  |                    |                    |                        | TFAPEEISAMVLTK        | 48        |
|      |                                  |                    |                    |                        | ITPSYVAFTPEGER        | 76        |
|      |                                  |                    |                    |                        | VTHAVVTVPAYFNDAQR     | 72        |
| 1051 | TSA                              | gi 1617118         | 9                  | 2                      | EGGLGPLNIPLLADVTR     | 106       |
|      |                                  |                    |                    |                        | KEGGLGPLNIPLLADVTR    | 106       |

| No.  | Protein description                         | NCBI accession no. | Sequence coverage% | Matched peptide number | Peptide sequence         | Ion score |
|------|---------------------------------------------|--------------------|--------------------|------------------------|--------------------------|-----------|
| 1052 | oxygen regulated protein precursor variant  | gi 62897071        | 5                  | 3                      | AHFNLDESGVLSLDR          | 59        |
|      |                                             |                    |                    |                        | LYQPEYQEVSTEEQR          | 53        |
|      |                                             |                    |                    |                        | YSHDFNFHINYGDLGFLGPEDLR  | 48        |
| 1053 | smooth muscle myosin heavy chain            | gi 4417214         | 4                  | 2                      | LQQELDDLVDLDNQR          | 50        |
|      |                                             |                    |                    |                        | DVASLSSQLQDTQELLQEETR    | 65        |
| 1054 | TAGLN                                       | gi 49168456        | 4                  | 2                      | YDEELEER                 | 39        |
|      |                                             |                    |                    |                        | KYDEELEER                | 54        |
| 1055 | aldehyde dehydrogenase 1A1                  | gi 21361176        | 5                  | 2                      | TIPIDGNFFTYTR            | 101       |
|      |                                             |                    |                    |                        | IFVEESIYDEFVR            | 107       |
| 1056 | protein disulfide isomerase-related protein | gi 1710248         | 16                 | 4                      | TGEAIVDAALSALR           | 76        |
| 5    |                                             |                    |                    |                        | LAAVDATVNQVLASR          | 39        |
|      |                                             |                    |                    |                        | LYSSDDVIELTPSNFNR        | 53        |
|      |                                             |                    |                    |                        | ALDLFSDNAPPPELLEIINEDIAK | 82        |
| 1057 | 3-oxoacyl-CoA thiolase                      | gi 22796316        | 10                 | 2                      | AEELGLPILGVLR            | 49        |
|      |                                             |                    |                    |                        | IAQFLSDIPETVPLSTVNR      | 71        |



| No.  | Protein description          | NCBI accession no. | Sequence coverage% | Matched peptide number | Peptide sequence        | Ion score |
|------|------------------------------|--------------------|--------------------|------------------------|-------------------------|-----------|
| 1058 | unnamed protein product      | gi 189054552       | 4                  | 3                      | FQNALLVR                | 44        |
|      |                              |                    |                    |                        | VPQVSTPTLVEVSR          | 39        |
|      |                              |                    |                    |                        | KVPQVSTPTLVEVSR         | 84        |
| 1059 | actin, cytoplasmic 2         | gi 4501887         | 8                  | 2                      | QEYDESGPSIVHR           | 39        |
|      |                              |                    |                    |                        | SYELPDGQVITIGNER        | 120       |
| 1060 | ATP5A1 protein               | gi 13938339        | 6                  | 2                      | EAYPGDVFYLHSR           | 88        |
|      |                              |                    |                    |                        | QGQYSPMAIEEQVAVIYAGVR   | 73        |
| 1061 | HSPA2 protein                | gi 23271312        | 9                  | 4                      | VEIANDQGNR              | 51        |
|      |                              |                    |                    |                        | TTPSYVAFTDTER           | 124       |
|      |                              |                    |                    |                        | STAGDTHLGGEDFDNR        | 72        |
|      |                              |                    |                    |                        | VHSAVITVPAYFNDSQR       | 120       |
| 1062 | actin, cytoplasmic 2         | gi 4501887         | 8                  | 2                      | QEYDESGPSIVHR           | 60        |
|      |                              |                    |                    |                        | SYELPDGQVITIGNER        | 110       |
| 1063 | Human Muscle Pyruvate Kinase | gi 67464392        | 9                  | 3                      | LDIDSPITAR              | 49        |
|      |                              |                    |                    |                        | FGVEQDVMVFASFIR         | 45        |
|      |                              |                    |                    |                        | TATESFASDPILYRPVAVALDTK | 39        |

| No.  | Protein description                                   | NCBI accession no. | Sequence coverage% | Matched peptide number | Peptide sequence      | Ion score |
|------|-------------------------------------------------------|--------------------|--------------------|------------------------|-----------------------|-----------|
| 1064 | aldehyde dehydrogenase 1                              | gi 2183299         | 7                  | 3                      | QAFQIGSPWR            | 49        |
|      |                                                       |                    |                    |                        | TIPIDGNFFTYTR         | 94        |
|      |                                                       |                    |                    |                        | IFVEESYDEFVR          | 115       |
| 1065 | aldehyde dehydrogenase 1A1                            | gi 21361176        | 5                  | 2                      | TIPIDGNFFTYTR         | 49        |
|      |                                                       |                    |                    |                        | IFVEESYDEFVR          | 58        |
| 1066 | chaperonin containing TCP1, subunit 2 (beta), isoform | gi 119617636       | 15                 | 4                      | GATQQILDEAER          | 44        |
|      |                                                       |                    |                    |                        | QVLLSAAEAAEVILR       | 87        |
|      |                                                       |                    |                    |                        | VQDDEVGDGTTSTVLAELLR  | 183       |
|      |                                                       |                    |                    |                        | MLPTIADNAGYDSADLVAQLR | 45        |
| 1067 | lamin A/C isoform 1 precursor                         | gi 27436946        | 4                  | 2                      | SLETENAGLR            | 48        |
|      |                                                       |                    |                    |                        | NSNLVGAAHEELQQSR      | 91        |
| 1068 | heat shock 70kDa protein 8 isoform 1 variant          | gi 62897129        | 7                  | 3                      | FEELNADLFR            | 62        |
|      |                                                       |                    |                    |                        | NQTAEKEEFHQK          | 48        |
|      |                                                       |                    |                    |                        | QTQTFTTYSNQPGLIQVYGER | 88        |

| No.  | Protein description                          | NCBI accession no. | Sequence coverage% | Matched peptide number | Peptide sequence   | Ion score |
|------|----------------------------------------------|--------------------|--------------------|------------------------|--------------------|-----------|
| 1069 | aldehyde dehydrogenase 1A1                   | gi 21361176        | 5                  | 2                      | TIPIDGNFFTYTR      | 51        |
|      |                                              |                    |                    |                        | IFVEESYDEFVR       | 69        |
| 1070 | glutathione S-transferase Mu 3               | gi 23065552        | 13                 | 2                      | LLLEFTDTSYEEK      | 72        |
|      |                                              |                    |                    |                        | LTFVDFLTYDILDQNR   | 153       |
| 1071 | fructose-bisphosphate aldolase A             | gi 4557305         | 7                  | 2                      | ADDGRPFQVIK        | 40        |
|      |                                              |                    |                    |                        | FSHEEIAMATVTALR    | 51        |
| 1072 | alpha 3 type VI collagen isoform 2 precursor | gi 240255542       | 3                  | 2                      | DVVFLLDGSEGVR      | 51        |
|      |                                              |                    |                    |                        | IEDGVLQFLVLLVAGR   | 40        |
| 1073 | actin, cytoplasmic 2                         | gi 4501887         | 8                  | 2                      | QEYDESGPSIVHR      | 40        |
|      |                                              |                    |                    |                        | SYELPDGQVITIGNER   | 121       |
| 1074 | GRP78 precursor                              | gi 386758          | 13                 | 6                      | SDIDEIVLVGGSTR     | 117       |
|      |                                              |                    |                    |                        | ITPSYVAFTPEGER     | 97        |
|      |                                              |                    |                    |                        | KSDIDEIVLVGGSTR    | 106       |
|      |                                              |                    |                    |                        | VTHAVVTVPAYFNDAQR  | 134       |
|      |                                              |                    |                    |                        | DNHLLGTFDLTGIPPAPR | 165       |
|      |                                              |                    |                    |                        | IEIESFYEGEDFSETLTR | 156       |

| No.  | Protein description                             | NCBI accession no. | Sequence coverage% | Matched peptide number | Peptide sequence         | Ion score |
|------|-------------------------------------------------|--------------------|--------------------|------------------------|--------------------------|-----------|
| 1075 | actin, cytoplasmic 2                            | gi 4501887         | 13                 | 3                      | QEYDESGPSIVHR            | 94        |
|      |                                                 |                    |                    |                        | SYELPDGQVITIGNER         | 153       |
|      |                                                 |                    |                    |                        | VAPEEHPVLLTEAPLNPK       | 71        |
| 1076 | protein disulfide isomerase                     | gi 860986          | 7                  | 2                      | ELSDFISYLQR              | 62        |
|      |                                                 |                    |                    |                        | TFSHELSDFGLESTAGEIPVVAIR | 88        |
| 1077 | endoplasmic reticulum protein 29, isoform CRA_b | gi 119618398       | 9                  | 2                      | ESYPVFYLFER              | 71        |
|      |                                                 |                    |                    |                        | ILDQGEDFPASEMTR          | 37        |
| 1078 | albumin preproprotein                           | gi 4502027         | 6                  | 3                      | FQNALLVR                 | 53        |
|      |                                                 |                    |                    |                        | DVFLGMFLYEYAR            | 62        |
|      |                                                 |                    |                    |                        | KVPQVSTPTLVEVSR          | 45        |
| 1079 | mutant desmin                                   | gi 71011128        | 8                  | 3                      | VAELYEEELR               | 69        |
|      |                                                 |                    |                    |                        | FASEASGYQDNIAR           | 79        |
|      |                                                 |                    |                    |                        | FLEQQNAALAAEVNR          | 147       |
| 1080 | ACO2                                            | gi 49168620        | 4                  | 2                      | SQFTITPGSEQIR            | 68        |
|      |                                                 |                    |                    |                        | NAVVTQEFGPVPDAR          | 46        |

| No.  | Protein description              | NCBI accession no. | Sequence coverage% | Matched peptide number | Peptide sequence   | Ion score |
|------|----------------------------------|--------------------|--------------------|------------------------|--------------------|-----------|
| 1081 | prepro-alpha2(I) collagen        | gi 1418930         | 2                  | 2                      | GEAGAAGPAGPAGPR    | 45        |
|      |                                  |                    |                    |                        | GETGPSGPVGPAGAVGPR | 94        |
| 1082 | actin, cytoplasmic 2             | gi 4501887         | 8                  | 2                      | QEYDESGPSIVHR      | 90        |
|      |                                  |                    |                    |                        | SYELPDGQVITIGNER   | 130       |
| 1083 | mutant desmin                    | gi 71011128        | 5                  | 2                      | VAELYEEELR         | 54        |
|      |                                  |                    |                    |                        | FLEQQNAALAAEVNR    | 79        |
| 1084 | smooth muscle myosin heavy chain | gi 36507           | 1                  | 2                      | QLHEYETELEDER      | 50        |
|      |                                  |                    |                    |                        | LQQELDDLVDLDNQR    | 57        |
| 1085 | filamin-A isoform 2              | gi 160420317       | 2                  | 4                      | YGGDEIPFSPYR       | 51        |
|      |                                  |                    |                    |                        | AFGPGLQGGGAGSPAR   | 44        |
|      |                                  |                    |                    |                        | VANPSGNLTETYVQDR   | 76        |
|      |                                  |                    |                    |                        | EGPYSISVLYGDEEVPR  | 67        |
| 1086 | FLJ00119 protein                 | gi 18676444        | 2                  | 2                      | YGGDEIPFSPYR       | 38        |
|      |                                  |                    |                    |                        | EGPYSISVLYGDEEVPR  | 47        |
| 1087 | aldehyde dehydrogenase 1         | gi 2183299         | 7                  | 3                      | QAFQIGSPWR         | 42        |
|      |                                  |                    |                    |                        | TIPIDGNFFTYTR      | 77        |

| No.  | Protein description                         | NCBI accession no. | Sequence coverage% | Matched peptide number | Peptide sequence        | Ion score |
|------|---------------------------------------------|--------------------|--------------------|------------------------|-------------------------|-----------|
|      |                                             |                    |                    |                        | IFVEESYDEFVR            | 90        |
| 1088 | heat shock protein 27                       | gi 662841          | 21                 | 3                      | LFDQAFGLPR              | 65        |
|      |                                             |                    |                    |                        | VSLDVNHFAPDELTVK        | 43        |
|      |                                             |                    |                    |                        | LATQSNEITIPVTFESR       | 92        |
| 1089 | outer dense fiber protein 2/2               | gi 2996006         | 4                  | 2                      | LEADEVAAQLER            | 44        |
|      |                                             |                    |                    |                        | KEELEEVAAHELAETEHENTVLR | 143       |
| 1090 | heat shock cognate 71 kDa protein isoform 1 | gi 5729877         | 8                  | 4                      | DAGTIAGLNVLRL           | 101       |
|      |                                             |                    |                    |                        | VEIANDQGNR              | 66        |
|      |                                             |                    |                    |                        | TTPSYVAFTDTER           | 119       |
|      |                                             |                    |                    |                        | TVTNAVVTVPAYFNDSQR      | 120       |
| 1091 | tubulin beta-2C chain                       | gi 5174735         | 6                  | 2                      | FPGQLNADLR              | 58        |
|      |                                             |                    |                    |                        | GHYTEGAELVDSVLDVVR      | 95        |
| 1092 | creatine kinase B-type                      | gi 21536286        | 16                 | 4                      | DLFDPIIEDR              | 60        |
|      |                                             |                    |                    |                        | VLTPELYAELR             | 80        |
|      |                                             |                    |                    |                        | LAVEALSSLDGDLAGR        | 84        |

| No.  | Protein description                           | NCBI accession no. | Sequence coverage% | Matched peptide number | Peptide sequence         | Ion score |
|------|-----------------------------------------------|--------------------|--------------------|------------------------|--------------------------|-----------|
|      |                                               |                    |                    |                        | TDLNPDNLQGGDDLDPNYVLSSR  | 139       |
| 1093 | neuropolypeptide h3                           | gi 913159          | 17                 | 2                      | LYTLVLTPDPAPSR           | 90        |
|      |                                               |                    |                    |                        | GNDISSGTVLSDYVGSPPK      | 69        |
| 1094 | protein disulfide isomerase-related protein 5 | gi 1710248         | 7                  | 2                      | TGEAIVDAALSALR           | 94        |
|      |                                               |                    |                    |                        | LYSSDDVIELTPSNFNR        | 110       |
| 1095 | heat shock cognate 71 kDa protein isoform 1   | gi 5729877         | 13                 | 5                      | FEELNADLFR               | 51        |
|      |                                               |                    |                    |                        | TTPSYVAFTDTER            | 50        |
|      |                                               |                    |                    |                        | STAGDTHLGGEDFDNR         | 75        |
|      |                                               |                    |                    |                        | TVTNAVVTVPAYFNDSQR       | 41        |
|      |                                               |                    |                    |                        | QTQTFTTYSQNPQGVLIQVYEGER | 77        |
| 1096 | TapasinERP57 HETERODIMER                      | gi 220702506       | 13                 | 5                      | ELSDFISYLQR              | 89        |
|      |                                               |                    |                    |                        | SDVLELTDDNFESR           | 95        |
|      |                                               |                    |                    |                        | MDATANDVPSPEYVR          | 57        |
|      |                                               |                    |                    |                        | TFSHELSDFGLESTAGEIPVVAIR | 193       |

| No.  | Protein description              | NCBI accession no. | Sequence coverage% | Matched peptide number | Peptide sequence          | Ion score |
|------|----------------------------------|--------------------|--------------------|------------------------|---------------------------|-----------|
|      |                                  |                    |                    |                        | KTFSHELSDFGLESTAGEIPVVAIR | 139       |
| 1097 | smooth muscle myosin heavy chain | gi 4417214         | 4                  | 2                      | LQQELDDLVDLDNQR           | 97        |
|      |                                  |                    |                    |                        | DVASLSSQLQDTQELLQEETR     | 82        |
| 1098 | TAGLN                            | gi 49168456        | 11                 | 2                      | KYDEELEER                 | 60        |
|      |                                  |                    |                    |                        | TDMFQTVDLFEGK             | 39        |
| 1099 | actin, aortic smooth muscle      | gi 4501883         | 8                  | 2                      | QEYDEAGPSIVHR             | 38        |
|      |                                  |                    |                    |                        | SYELPDGQVITIGNER          | 132       |
| 1100 | fructose-bisphosphate aldolase A | gi 4557305         | 11                 | 3                      | ADDGRPPQVIK               | 44        |
|      |                                  |                    |                    |                        | LQSIGTENTEENR             | 43        |
|      |                                  |                    |                    |                        | FSHEEIAMATVTALR           | 38        |
| 1101 | rapamycin-binding protein        | gi 182640          | 9                  | 2                      | LVIPSELGYGER              | 48        |
|      |                                  |                    |                    |                        | KLVIPSELGYGER             | 44        |
| 1102 | GRP78 precursor                  | gi 386758          | 10                 | 5                      | SDIDEIVLVGGSTR            | 91        |
|      |                                  |                    |                    |                        | KSDIDEIVLVGGSTR           | 83        |
|      |                                  |                    |                    |                        | VTHAVVTVPAYFNDAQR         | 76        |
|      |                                  |                    |                    |                        | DNHLLGTFDLTGIPPAPR        | 112       |



| No.  | Protein description                      | NCBI accession no. | Sequence coverage% | Matched peptide number | Peptide sequence             | Ion score |
|------|------------------------------------------|--------------------|--------------------|------------------------|------------------------------|-----------|
|      |                                          |                    |                    |                        | IEIESFYEGEDFSETLTR           | 126       |
| 1103 | actin, alpha cardiac muscle 1 proprotein | gi 4885049         | 8                  | 2                      | QEYDEAGPSIVHR                | 46        |
|      |                                          |                    |                    |                        | SYELPDGQVITIGNER             | 100       |
| 1104 | filamin A                                | gi 190192184       | 3                  | 4                      | DAPQDFHPDR                   | 59        |
|      |                                          |                    |                    |                        | LPQLPITNFSR                  | 51        |
|      |                                          |                    |                    |                        | SAGQGEVLVYVEDPAGHQEEAK       | 123       |
|      |                                          |                    |                    |                        | SADFVVEAIGDDVGTGLGFSVEGPSQAK | 123       |
| 1105 | heat shock protein gp96 precursor        | gi 15010550        | 4                  | 3                      | EAESSPFVER                   | 60        |
|      |                                          |                    |                    |                        | KEAESSPFVER                  | 59        |
|      |                                          |                    |                    |                        | FQSSHPTDITSLDQYVER           | 142       |
| 1106 | collagen type VI, alpha 3 chain          | gi 3127926         | 3                  | 5                      | ALILVGLER                    | 39        |
|      |                                          |                    |                    |                        | SVEDAQDVSLALTQR              | 100       |
|      |                                          |                    |                    |                        | VAVVTYNNEVTTEIR              | 91        |
|      |                                          |                    |                    |                        | VVIHFTDGADGDLADLHR           | 79        |
|      |                                          |                    |                    |                        | GAQGPAGPAGPPGLIGEQGISGPR     | 98        |
| 1107 | mutant desmin                            | gi 71011128        | 15                 | 5                      | VAELYEELR                    | 64        |

| No.  | Protein description      | NCBI accession no. | Sequence coverage% | Matched peptide number | Peptide sequence         | Ion score |
|------|--------------------------|--------------------|--------------------|------------------------|--------------------------|-----------|
|      |                          |                    |                    |                        | FASEASGYQDNIAR           | 96        |
|      |                          |                    |                    |                        | RIESLNEEIAFLK            | 47        |
|      |                          |                    |                    |                        | FLEQQNAALAAEVNR          | 143       |
|      |                          |                    |                    |                        | LQEEIQLKEEAENNLAAFR      | 111       |
| 1108 | TapasinERP57 HETERODIMER | gi 220702506       | 10                 | 3                      | SDVLELTDDNFESR           | 80        |
|      |                          |                    |                    |                        | MDATANDVSPYEVNR          | 39        |
|      |                          |                    |                    |                        | TFSHELSDFGLESTAGEIPVVAIR | 133       |
| 1109 | ACO2                     | gi 49168620        | 6                  | 3                      | SQFTITPGSEQIR            | 54        |
|      |                          |                    |                    |                        | NAVQTQFEGPVPDTAR         | 78        |
|      |                          |                    |                    |                        | WVIGDENYEGGSSR           | 43        |
| 1110 | ACO2                     | gi 49168620        | 4                  | 2                      | SQFTITPGSEQIR            | 42        |
|      |                          |                    |                    |                        | NAVQTQFEGPVPDTAR         | 47        |
| 1111 | heat shock protein 60    | gi 77702086        | 14                 | 4                      | AAVEEGIVLGGGCALLR        | 107       |
|      |                          |                    |                    |                        | IQEIIQLDVTTSEYEK         | 95        |
|      |                          |                    |                    |                        | KPLVIAEDVDGEALSTLVLR     | 162       |
|      |                          |                    |                    |                        | LVQDVANNTNEEAGDGTATVLR   | 150       |

| No.  | Protein description                             | NCBI accession no. | Sequence coverage% | Matched peptide number | Peptide sequence         | Ion score |
|------|-------------------------------------------------|--------------------|--------------------|------------------------|--------------------------|-----------|
| 1112 | protein disulfide isomerase                     | gi 860986          | 12                 | 4                      | ELSDFISYLQR              | 49        |
|      |                                                 |                    |                    |                        | DLLIAYYDVDYEK            | 56        |
|      |                                                 |                    |                    |                        | MDATANDVSPYEVR           | 53        |
|      |                                                 |                    |                    |                        | TFSHELSDFGLESTAGEIPVVAIR | 120       |
| 1113 | GRP78 precursor                                 | gi 386758          | 8                  | 3                      | SDIDEIVLVGGSTR           | 61        |
|      |                                                 |                    |                    |                        | DNHLLGTFDLTGIPPAPR       | 98        |
|      |                                                 |                    |                    |                        | IEIESFYEGEDFSETLTR       | 75        |
| 1114 | Collagen, type VI, alpha 2                      | gi 41350923        | 3                  | 2                      | DIASTPHELYR              | 53        |
|      |                                                 |                    |                    |                        | YGGLHFSDQVEVFSPPGSDR     | 134       |
| 1115 | lipoamide dehydrogenase precursor old gene name | gi 307137          | 6                  | 2                      | NLGLEELGIELDPR           | 48        |
|      |                                                 |                    |                    |                        | AEVITCDVLLVCIGR          | 72        |
| 1116 | glutathione S-transferase Mu 3                  | gi 23065552        | 13                 | 2                      | LLLEFTDTSYEEK            | 38        |
|      |                                                 |                    |                    |                        | LTFVDFLTVDILDQNR         | 116       |
| 1117 | mitochondrial ATP synthase                      | gi 89574029        | 21                 | 6                      | AHGGYSVFAGVGER           | 116       |
|      |                                                 |                    |                    |                        | VALTGLTVAEYFR            | 63        |

| No.  | Protein description                            | NCBI accession no. | Sequence coverage% | Matched peptide number | Peptide sequence        | Ion score |
|------|------------------------------------------------|--------------------|--------------------|------------------------|-------------------------|-----------|
|      |                                                |                    |                    |                        | LVLEVAQHLGESTVR         | 100       |
|      |                                                |                    |                    |                        | IMDPNIVGSEHYDVAR        | 55        |
|      |                                                |                    |                    |                        | DQEGQDVLLFIDNIFR        | 147       |
|      |                                                |                    |                    |                        | AIAELGIYPAVDPLDSTSR     | 93        |
| 1118 | actin, gamma-enteric smooth muscle propeptide  | gi 4501889         | 7                  | 2                      | GYSFVTTAER              | 43        |
|      |                                                |                    |                    |                        | SYELPDGQVITIGNER        | 132       |
| 1119 | ubiquitin and ribosomal protein S27a precursor | gi 4506713         | 16                 | 2                      | EGIPPDQQR               | 38        |
|      |                                                |                    |                    |                        | TITLEVEPSDTIENVK        | 60        |
| 1120 | 3-oxoacyl-CoA thiolase                         | gi 22796316        | 10                 | 2                      | AEELGLPILGVLR           | 54        |
|      |                                                |                    |                    |                        | IAQFLSDIPETVPLSTVNR     | 76        |
| 1121 | heat shock protein 60                          | gi 77702086        | 14                 | 4                      | AAVEEGIVLGGGCALLR       | 72        |
|      |                                                |                    |                    |                        | IQEIIQLDVTTSEYEK        | 92        |
|      |                                                |                    |                    |                        | KPLVIAEDVDGEALSTLVNLR   | 165       |
|      |                                                |                    |                    |                        | LVQDVANNTNEEAGDGTATVLAR | 94        |

| No.  | Protein description                          | NCBI accession no. | Sequence coverage% | Matched peptide number | Peptide sequence         | Ion score |
|------|----------------------------------------------|--------------------|--------------------|------------------------|--------------------------|-----------|
| 1122 | alpha 3 type VI collagen isoform 2 precursor | gi 240255542       | 6                  | 3                      | IEDGVLQFLVLLVAGR         | 63        |
|      |                                              |                    |                    |                        | DILFLFDGSANLVGQFPVVR     | 54        |
|      |                                              |                    |                    |                        | GADQAELEEIAFDSSLVFIPAEFR | 94        |
| 1123 | Tubulin, beta 2C                             | gi 23958133        | 6                  | 2                      | FPGQLNADLR               | 69        |
|      |                                              |                    |                    |                        | GHYTEGAELVDSVLDVVR       | 157       |
| 1124 | endoplasmin precursor                        | gi 4507677         | 11                 | 7                      | GLFDEYGSK                | 66        |
|      |                                              |                    |                    |                        | FAFQAEVNR                | 69        |
|      |                                              |                    |                    |                        | SILFVPTSAPR              | 59        |
|      |                                              |                    |                    |                        | GVVDSDDLPLNVSR           | 84        |
|      |                                              |                    |                    |                        | EEEAIQLDGLNASQIR         | 112       |
|      |                                              |                    |                    |                        | ESDDPMAYIHFTAEGEVTFK     | 42        |
|      |                                              |                    |                    |                        | TDDEVVQREEEAIQLDGLNASQIR | 79        |
| 1125 | Collagen, type I, alpha 1                    | gi 22328092        | 3                  | 2                      | GETGPAGPAGVGPVGAR        | 96        |
|      |                                              |                    |                    |                        | DGEAGAQQPPGAPAGER        | 85        |
| 1126 | Triosephosphate isomerase                    | gi 999892          | 26                 | 3                      | VVLAYEPVWAIGTGK          | 55        |
|      |                                              |                    |                    |                        | VPADTEVVCAPPTAYIDFAR     | 94        |

| No.  | Protein description                                 | NCBI accession no. | Sequence coverage% | Matched peptide number | Peptide sequence              | Ion score |
|------|-----------------------------------------------------|--------------------|--------------------|------------------------|-------------------------------|-----------|
|      |                                                     |                    |                    |                        | ELASQPDVDGFLVGGASLKPEFVDIINAK | 100       |
| 1127 | hypothetical protein                                | gi 52545928        | 2                  | 2                      | DVVFLLDGSEGVR                 | 74        |
|      |                                                     |                    |                    |                        | LVDYLDVGFDTTR                 | 95        |
| 1128 | transketolase                                       | gi 388891          | 5                  | 2                      | LDNLVAILDINR                  | 49        |
|      |                                                     |                    |                    |                        | ILATPPQEDAPSVDIANIR           | 84        |
| 1129 | albumin preproprotein                               | gi 4502027         | 6                  | 3                      | FQNALLVR                      | 39        |
|      |                                                     |                    |                    |                        | DVFLGMFLYEYAR                 | 58        |
|      |                                                     |                    |                    |                        | KVPQVSTPTLVEVSR               | 74        |
| 1130 | FLJ00119 protein                                    | gi 18676444        | 4                  | 3                      | YGGDEIPFSPYR                  | 49        |
|      |                                                     |                    |                    |                        | EGPYSISVLYGDEEVPR             | 71        |
|      |                                                     |                    |                    |                        | FNEEHIPDSPFVVPVASPSGDAR       | 48        |
| 1131 | CKB                                                 | gi 49457530        | 14                 | 3                      | VLTPELYAELR                   | 72        |
|      |                                                     |                    |                    |                        | GTGGVDTAAVGGVFDVSNADR         | 38        |
|      |                                                     |                    |                    |                        | TDLNPDNLQGGDDLDPNYVLSSR       | 129       |
| 1132 | heterogeneous nuclear ribonucleoprotein A3, isoform | gi 119631468       | 19                 | 4                      | GFAFVTFDHDTVSK                | 80        |

| No.  | Protein description                       | NCBI accession no. | Sequence coverage% | Matched peptide number | Peptide sequence       | Ion score |
|------|-------------------------------------------|--------------------|--------------------|------------------------|------------------------|-----------|
|      |                                           |                    |                    |                        | LFIGGLSFETDDSLR        | 58        |
|      |                                           |                    |                    |                        | IFVGGIKEDTEEYNLR       | 50        |
|      |                                           |                    |                    |                        | SSGSPYGGGYGSGGGSGGYGSR | 75        |
| 1133 | TapasinERP57 HETERODIMER                  | gi 220702506       | 10                 | 4                      | LAPEYEAATR             | 64        |
|      |                                           |                    |                    |                        | DGEEAGAYDGPR           | 79        |
|      |                                           |                    |                    |                        | DLLIAYYDVDYEK          | 45        |
|      |                                           |                    |                    |                        | SDVLELTDDNFESR         | 81        |
| 1134 | Glutathione S-transferase P               | gi 23200510        | 23                 | 3                      | PPYTVVYFPVR            | 68        |
|      |                                           |                    |                    |                        | ALPGQLKPFETLLSQNQGGK   | 87        |
|      |                                           |                    |                    |                        | YISLIYTNYEAGKDDYVK     | 49        |
| 1135 | Annexin A2                                | gi 73909156        | 15                 | 5                      | AYTNFDAER              | 45        |
|      |                                           |                    |                    |                        | QDIAFAYQR              | 52        |
|      |                                           |                    |                    |                        | GVDEVTIVNILTNR         | 90        |
|      |                                           |                    |                    |                        | AEDGSVIDYELIDQDAR      | 107       |
|      |                                           |                    |                    |                        | RAEDGSVIDYELIDQDAR     | 80        |
| 1136 | collagen, type VI, alpha 3, isoform CRA_f | gi 119591514       | 1                  | 2                      | SVEDAQDVSLALTQR        | 56        |

| No.  | Protein description                       | NCBI accession no. | Sequence coverage% | Matched peptide number | Peptide sequence        | Ion score |
|------|-------------------------------------------|--------------------|--------------------|------------------------|-------------------------|-----------|
|      |                                           |                    |                    |                        | VVIHFTDGADGDLADLHR      | 46        |
| 1137 | collagen, type VI, alpha 3, isoform CRA_f | gi 119591514       | 1                  | 2                      | SVEDAQDVSLALTQR         | 110       |
|      |                                           |                    |                    |                        | VVIHFTDGADGDLADLHR      | 62        |
| 1138 | mutant desmin                             | gi 71011128        | 17                 | 6                      | DNLLDDLQR               | 56        |
|      |                                           |                    |                    |                        | VAELYEEELR              | 84        |
|      |                                           |                    |                    |                        | FASEASGYQDNIAR          | 136       |
|      |                                           |                    |                    |                        | RIESLNEEIAFLK           | 44        |
|      |                                           |                    |                    |                        | FLEQQNAALAAEVNR         | 139       |
|      |                                           |                    |                    |                        | LQEEIQLKEEAENNLAAFR     | 102       |
| 1139 | lamin B2, isoform CRA_a                   | gi 119589784       | 4                  | 2                      | ALYESELADAR             | 56        |
|      |                                           |                    |                    |                        | DVMQQQLAEYQELLDVK       | 51        |
| 1140 | collagen, type VI, alpha 3, isoform CRA_d | gi 119591512       | 3                  | 4                      | DVVFLLDGSEGVR           | 93        |
|      |                                           |                    |                    |                        | ALNLGYALDYAQR           | 56        |
|      |                                           |                    |                    |                        | LVDYLDVGFDTTR           | 85        |
|      |                                           |                    |                    |                        | GADQAELEEIAFDSSLVFPAEFR | 161       |
| 1141 | Transferrin                               | gi 37747855        | 4                  | 3                      | EGYYGYTGAFR             | 87        |



| No.  | Protein description                             | NCBI accession no. | Sequence coverage% | Matched peptide number | Peptide sequence        | Ion score |
|------|-------------------------------------------------|--------------------|--------------------|------------------------|-------------------------|-----------|
|      |                                                 |                    |                    |                        | DQYELLCLDNTR            | 69        |
|      |                                                 |                    |                    |                        | ADRDQYELLCLDNTR         | 99        |
| 1142 | ubiquinol-cytochrome c reductase core I protein | gi 515634          | 9                  | 2                      | NALVSHLDGTTVPCEDIGR     | 55        |
|      |                                                 |                    |                    |                        | YIYDQCPAVAGYGPIEQLPDYNR | 91        |
| 1143 | mutant desmin                                   | gi 71011128        | 6                  | 2                      | FASEASGYQDNIAR          | 37        |
|      |                                                 |                    |                    |                        | FLEQQNAALAAEVNR         | 85        |
| 1144 | unnamed protein product                         | gi 194389904       | 8                  | 2                      | VLTPELYAELR             | 44        |
|      |                                                 |                    |                    |                        | LAVEALSSLDGDLAGR        | 55        |
| 1145 | actin, alpha cardiac muscle 1 proprotein        | gi 4885049         | 8                  | 2                      | QEYDEAGPSIVHR           | 42        |
|      |                                                 |                    |                    |                        | SYELPDGQVITIGNER        | 104       |
| 1146 | Tubulin, beta 2C                                | gi 23958133        | 10                 | 3                      | FPGQLNADLR              | 89        |
|      |                                                 |                    |                    |                        | AVLVDLEPGTMDSVR         | 51        |
|      |                                                 |                    |                    |                        | GHYTEGAELVDSVLDVVR      | 157       |
| 1147 | heterogeneous nuclear ribonucleoproteins A2/B1  | gi 14043072        | 9                  | 2                      | GGGGNFGPGPGSNFR         | 60        |

| No.  | Protein description              | NCBI accession no. | Sequence coverage% | Matched peptide number | Peptide sequence        | Ion score |
|------|----------------------------------|--------------------|--------------------|------------------------|-------------------------|-----------|
|      |                                  |                    |                    |                        | LFIGGLSFETTEESLR        | 47        |
| 1148 | actin, aortic smooth muscle      | gi 4501883         | 12                 | 3                      | IWHHSFYNELR             | 57        |
|      |                                  |                    |                    |                        | SYELPDGQVITIGNER        | 133       |
|      |                                  |                    |                    |                        | VAPEEHPTLLTEAPLNPK      | 37        |
| 1149 | smooth muscle myosin heavy chain | gi 36507           | 3                  | 3                      | QLHEYETELEDER           | 38        |
|      |                                  |                    |                    |                        | LQQELDDLWVDLDNQR        | 81        |
|      |                                  |                    |                    |                        | DVASLSSQLQDTQELLQEETR   | 64        |
| 1150 | calreticulin precursor variant   | gi 62897681        | 9                  | 2                      | IKDPDASKPEDWDER         | 65        |
|      |                                  |                    |                    |                        | CKDDEFTHLYTLIVRPDNTYEVK | 55        |
| 1151 | Cathepsin B precursor            | gi 157833437       | 9                  | 2                      | HYGYSYSVSNSEK           | 61        |
|      |                                  |                    |                    |                        | GQDHCIESEVVAGIPR        | 117       |
| 1152 | PGK1                             | gi 48145549        | 8                  | 2                      | LGDVYVNDAFGTAHR         | 65        |
|      |                                  |                    |                    |                        | ALESPERFLAILGGAK        | 52        |
| 1153 | aldehyde dehydrogenase 1A1       | gi 21361176        | 8                  | 3                      | EEIFGPVQQIMK            | 37        |
|      |                                  |                    |                    |                        | TIPIDGNFFTYTR           | 76        |
|      |                                  |                    |                    |                        | IFVEESYDEFVR            | 93        |

| No.  | Protein description                  | NCBI accession no. | Sequence coverage% | Matched peptide number | Peptide sequence       | Ion score |
|------|--------------------------------------|--------------------|--------------------|------------------------|------------------------|-----------|
| 1154 | enolase 1 variant                    | gi 62896593        | 15                 | 5                      | YISPDQLADLYK           | 60        |
|      |                                      |                    |                    |                        | VVIGMDVAASEFFR         | 58        |
|      |                                      |                    |                    |                        | VVIGMDVAASEFFR         | 58        |
|      |                                      |                    |                    |                        | AAVPSGASTGIYEALELR     | 134       |
|      |                                      |                    |                    |                        | FTASAGIQVVGDDLTVTNPK   | 45        |
| 1155 | hypothetical protein                 | gi 31873302        | 10                 | 3                      | YISPDQLADLYK           | 38        |
|      |                                      |                    |                    |                        | VVIGMDVAASEFFR         | 43        |
|      |                                      |                    |                    |                        | AAVPSGASTGIYEALELR     | 114       |
| 1156 | vinculin                             | gi 7669550         | 4                  | 2                      | GILSGTSDLLLTDFDEAEVR   | 53        |
|      |                                      |                    |                    |                        | LLAVAATAPPDAPNREEVFDER | 58        |
| 1157 | MTHSP75                              | gi 292059          | 6                  | 3                      | VQQTVDLFGFR            | 45        |
|      |                                      |                    |                    |                        | AQFEGIVTDLIR           | 56        |
|      |                                      |                    |                    |                        | NAVITVPAYFNDSQR        | 44        |
| 1158 | heat shock protein 70 testis variant | gi 3461866         | 4                  | 2                      | DAGVIAGLNVLK           | 39        |
|      |                                      |                    |                    |                        | TTPSYVAFTDTER          | 120       |
| 1159 | ALB protein                          | gi 23241675        | 17                 | 5                      | FQNALLVR               | 43        |

| No.  | Protein description                 | NCBI accession no. | Sequence coverage% | Matched peptide number | Peptide sequence               | Ion score |
|------|-------------------------------------|--------------------|--------------------|------------------------|--------------------------------|-----------|
|      |                                     |                    |                    |                        | AVMDDFAAFVEK                   | 47        |
|      |                                     |                    |                    |                        | KVPQVSTPTLVEVSR                | 56        |
|      |                                     |                    |                    |                        | RPCFSALEVDETYVPK               | 45        |
|      |                                     |                    |                    |                        | VFDEFKPLVEEPQNLIK              | 79        |
| 1160 | unnamed protein product             | gi 28590           | 9                  | 4                      | FQNALLVR                       | 43        |
|      |                                     |                    |                    |                        | AVMDDFAAFVEK                   | 47        |
|      |                                     |                    |                    |                        | RPCFSALEVDETYVPK               | 45        |
|      |                                     |                    |                    |                        | VFDEFKPLVEEPQNLIK              | 79        |
| 1161 | KH-type splicing regulatory protein | gi 154355000       | 6                  | 2                      | AINQQTGAFVEISR                 | 50        |
|      |                                     |                    |                    |                        | GGGGPGGGGPGGGSAGGPSQPPGGGGPGIR | 37        |
| 1162 | TapasinERP57 HETERODIMER            | gi 220702506       | 15                 | 4                      | SDVLELTDDNFESR                 | 81        |
|      |                                     |                    |                    |                        | MDATANDVSPYEVR                 | 49        |
|      |                                     |                    |                    |                        | DASIVGFFDDSFSEAHSEFLK          | 114       |
|      |                                     |                    |                    |                        | TFSHELSDFGLESTAGEIPVVAIR       | 149       |
| 1163 | aldehyde dehydrogenase 1A1          | gi 21361176        | 10                 | 4                      | EEIFGPVQQIMK                   | 46        |
|      |                                     |                    |                    |                        | TIPIDGNFFTYTR                  | 74        |

| No.  | Protein description              | NCBI accession no. | Sequence coverage% | Matched peptide number | Peptide sequence         | Ion score |
|------|----------------------------------|--------------------|--------------------|------------------------|--------------------------|-----------|
|      |                                  |                    |                    |                        | IFVEESYDEFVR             | 93        |
|      |                                  |                    |                    |                        | ELGEYGFHEYTEVK           | 55        |
| 1164 | 3-phosphoglycerate dehydrogenase | gi 5771523         | 5                  | 2                      | DLPLLLFR                 | 51        |
|      |                                  |                    |                    |                        | EELIAELQDCEGLIVR         | 83        |
| 1165 | Hemoglobin subunit beta          | gi 3660145         | 41                 | 4                      | VNVDEVGGEALGR            | 47        |
|      |                                  |                    |                    |                        | EFTPPVQAAYQK             | 46        |
|      |                                  |                    |                    |                        | VLGAFSDGLAHLNLK          | 62        |
|      |                                  |                    |                    |                        | FFESFGDLSTPDAVMGNPK      | 75        |
| 1166 | albumin preproprotein            | gi 4502027         | 5                  | 2                      | AVMDDFAAFVEK             | 60        |
|      |                                  |                    |                    |                        | RPCFSALEVDETYVPK         | 63        |
| 1167 | ALB protein                      | gi 23241675        | 10                 | 3                      | FQNALLVR                 | 46        |
|      |                                  |                    |                    |                        | KVPQVSTPTLVEVSR          | 84        |
|      |                                  |                    |                    |                        | VFDEFKPLVEEPQNLIK        | 42        |
| 1168 | protein disulfide isomerase      | gi 860986          | 8                  | 2                      | MDATANDVSPYEVK           | 42        |
|      |                                  |                    |                    |                        | KTFSHLSDFGLESTAGEIPVVAIR | 103       |
| 1169 | fructose-bisphosphate aldolase A | gi 4557305         | 7                  | 2                      | ADDGRPFQVIK              | 47        |

| No.  | Protein description                      | NCBI accession no. | Sequence coverage% | Matched peptide number | Peptide sequence       | Ion score |
|------|------------------------------------------|--------------------|--------------------|------------------------|------------------------|-----------|
|      |                                          |                    |                    |                        | FSHEEIAMATVTALR        | 50        |
| 1170 | Chain A, Uncleaved Alpha-1-Antitrypsin   | gi 157830080       | 9                  | 2                      | LQHLENELTHDIITK        | 110       |
|      |                                          |                    |                    |                        | GTEAAGAMFLEAIPMSIPPEVK | 51        |
| 1171 | ALB protein                              | gi 23241675        | 8                  | 2                      | KVPQVSTPTLVEVSR        | 66        |
|      |                                          |                    |                    |                        | VFDEFKPLVEEPQNLIK      | 55        |
| 1172 | Similar to Elongation factor 2b          | gi 19353009        | 5                  | 2                      | YEWDVAEAR              | 51        |
|      |                                          |                    |                    |                        | AYLPVNESFGFTADLR       | 111       |
| 1173 | ALB protein                              | gi 23241675        | 17                 | 5                      | FQNALLVR               | 45        |
|      |                                          |                    |                    |                        | AVMDDFAAFVEK           | 59        |
|      |                                          |                    |                    |                        | KVPQVSTPTLVEVSR        | 107       |
|      |                                          |                    |                    |                        | RPCFSALEVDETYVPK       | 50        |
|      |                                          |                    |                    |                        | VFDEFKPLVEEPQNLIK      | 107       |
| 1174 | fructose-bisphosphate aldolase A         | gi 4557305         | 10                 | 2                      | FSHEEIAMATVTALR        | 66        |
|      |                                          |                    |                    |                        | IGEHTPSALAIMENANVLAR   | 47        |
| 1175 | actin, alpha cardiac muscle 1 proprotein | gi 4885049         | 8                  | 2                      | QEYDEAGPSIVHR          | 44        |
|      |                                          |                    |                    |                        | SYELPDGQVITIGNER       | 127       |

| No.  | Protein description                         | NCBI accession no. | Sequence coverage% | Matched peptide number | Peptide sequence         | Ion score |
|------|---------------------------------------------|--------------------|--------------------|------------------------|--------------------------|-----------|
| 1176 | unnamed protein product                     | gi 194388088       | 10                 | 4                      | LLQDFFDGR                | 53        |
|      |                                             |                    |                    |                        | FEELCSDLFR               | 55        |
|      |                                             |                    |                    |                        | AQIHDLVLVGGSTR           | 128       |
|      |                                             |                    |                    |                        | QTQIFTTYSDNQPGVLIQVYEGER | 114       |
| 1177 | heat shock cognate 71 kDa protein isoform 1 | gi 5729877         | 7                  | 3                      | FEELNADLFR               | 72        |
|      |                                             |                    |                    |                        | SQIHDIVLVGGSTR           | 60        |
|      |                                             |                    |                    |                        | QTQFTTTYSDNQPGVLIQVYEGER | 140       |
| 1178 | unnamed protein product                     | gi 189054552       | 7                  | 3                      | FQNALLVR                 | 66        |
|      |                                             |                    |                    |                        | KVPQVSTPTLVEVSR          | 80        |
|      |                                             |                    |                    |                        | VFDEFKPLVEEPQNLIK        | 78        |
| 1179 | Human Muscle Pyruvate Kinase                | gi 67464392        | 10                 | 3                      | LDIDSPITAR               | 50        |
|      |                                             |                    |                    |                        | GADFLVTEVENGGSLGSK       | 45        |
|      |                                             |                    |                    |                        | TATESFASDPILYRPVAVALDTK  | 68        |
| 1180 | albumin preproprotein                       | gi 4502027         | 13                 | 6                      | FQNALLVR                 | 54        |
|      |                                             |                    |                    |                        | RHPDYSVLLLLR             | 55        |

| No.  | Protein description                      | NCBI accession no. | Sequence coverage% | Matched peptide number | Peptide sequence     | Ion score |
|------|------------------------------------------|--------------------|--------------------|------------------------|----------------------|-----------|
|      |                                          |                    |                    |                        | DVFLGMFLYEYAR        | 54        |
|      |                                          |                    |                    |                        | KVPQVSTPTLVEVSR      | 85        |
|      |                                          |                    |                    |                        | VFDEFKPLVEEPQNLIK    | 104       |
|      |                                          |                    |                    |                        | QNCELFEQLGEYKFQNALLR | 58        |
| 1181 | actin, cytoplasmic 2                     | gi 4501887         | 13                 | 3                      | QEYDESGPSIVHR        | 67        |
|      |                                          |                    |                    |                        | SYELPDGQVITIGNER     | 117       |
|      |                                          |                    |                    |                        | VAPEEHPVLLTEAPLNPK   | 48        |
| 1182 | mutant desmin                            | gi 71011040        | 5                  | 2                      | EAAENNLAAFR          | 55        |
|      |                                          |                    |                    |                        | FASEASGYQDNIAR       | 96        |
| 1183 | actin, alpha cardiac muscle 1 proprotein | gi 4885049         | 8                  | 2                      | QEYDEAGPSIVHR        | 74        |
|      |                                          |                    |                    |                        | SYELPDGQVITIGNER     | 127       |
| 1184 | actin, cytoplasmic 2                     | gi 4501887         | 13                 | 3                      | QEYDESGPSIVHR        | 99        |
|      |                                          |                    |                    |                        | SYELPDGQVITIGNER     | 109       |
|      |                                          |                    |                    |                        | VAPEEHPVLLTEAPLNPK   | 67        |
| 1185 | mutant desmin                            | gi 71011128        | 15                 | 6                      | VAELYEEELR           | 70        |
|      |                                          |                    |                    |                        | EAAENNLAAFR          | 62        |



| No.  | Protein description        | NCBI accession no. | Sequence coverage% | Matched peptide number | Peptide sequence    | Ion score |
|------|----------------------------|--------------------|--------------------|------------------------|---------------------|-----------|
|      |                            |                    |                    |                        | FASEASGYQDNIAR      | 129       |
|      |                            |                    |                    |                        | RIESLNEEIAFLK       | 50        |
|      |                            |                    |                    |                        | FLEQQNAALAAEVNR     | 113       |
|      |                            |                    |                    |                        | LQEEIQLKEEAENNLAAFR | 117       |
| 1186 | albumin preproprotein      | gi 4502027         | 9                  | 4                      | CCTESLVNR           | 48        |
|      |                            |                    |                    |                        | AVMDDFAAFVEK        | 62        |
|      |                            |                    |                    |                        | RPCFSALEVDETYVPK    | 140       |
|      |                            |                    |                    |                        | EFNAETFTFHADICTLSEK | 52        |
| 1187 | peptidylprolyl isomerase A | gi 10863927        | 28                 | 3                      | IIPGFMCQGGDFTR      | 40        |
|      |                            |                    |                    |                        | SIYGEKFEDENFILK     | 54        |
|      |                            |                    |                    |                        | VNPTVFFDIAVDGEPLGR  | 139       |
| 1188 | peroxiredoxin-2            | gi 32189392        | 15                 | 3                      | QITVNDLPVGR         | 46        |
|      |                            |                    |                    |                        | EGGLGPLNIPLLADVTR   | 124       |
|      |                            |                    |                    |                        | KEGGLGPLNIPLLADVTR  | 112       |
| 1189 | albumin preproprotein      | gi 4502027         | 8                  | 3                      | AVMDDFAAFVEK        | 76        |
|      |                            |                    |                    |                        | RPCFSALEVDETYVPK    | 129       |

| No.  | Protein description | NCBI accession no. | Sequence coverage% | Matched peptide number | Peptide sequence      | Ion score |
|------|---------------------|--------------------|--------------------|------------------------|-----------------------|-----------|
|      |                     |                    |                    |                        | EFNAETFFHADICTLSEK    | 100       |
| 1190 | Annexin A2          | gi 73909156        | 23                 | 6                      | AYTNFDAER             | 55        |
|      |                     |                    |                    |                        | QDIAFAYQR             | 61        |
|      |                     |                    |                    |                        | TNQELQEINR            | 42        |
|      |                     |                    |                    |                        | GVDEVTIVNILTNR        | 99        |
|      |                     |                    |                    |                        | AEDGSVIDYELIDQDAR     | 121       |
|      |                     |                    |                    |                        | RAEDGSVIDYELIDQDAR    | 71        |
| 1191 | ATP5A1 protein      | gi 13938339        | 10                 | 3                      | EAYPGDVFYLHSR         | 75        |
|      |                     |                    |                    |                        | EVAFAAQFGSDLDAATQQLSR | 73        |
|      |                     |                    |                    |                        | FENAFLSHVVSQHQALLGTIR | 82        |
| 1192 | ALB protein         | gi 23241675        | 17                 | 5                      | FQNALLVR              | 61        |
|      |                     |                    |                    |                        | AVMDDFAAFVEK          | 39        |
|      |                     |                    |                    |                        | KVPQVSTPTLVEVSR       | 122       |
|      |                     |                    |                    |                        | RPCFSALEVDETYVPK      | 53        |
|      |                     |                    |                    |                        | VFDEFKPLVEEPQQLIK     | 44        |
| 1193 | Unknown             | gi 15679996        | 20                 | 3                      | FQNALLVR              | 46        |

| No.  | Protein description    | NCBI accession no. | Sequence coverage% | Matched peptide number | Peptide sequence  | Ion score |
|------|------------------------|--------------------|--------------------|------------------------|-------------------|-----------|
|      |                        |                    |                    |                        | KVPQVSTPTLVEVSR   | 80        |
|      |                        |                    |                    |                        | RPCFSALEVDETYVPK  | 44        |
| 1194 | hypothetical protein   | gi 51476390        | 4                  | 3                      | YLVEIAR           | 45        |
|      |                        |                    |                    |                        | LVNEVTEFAK        | 56        |
|      |                        |                    |                    |                        | FKDLGEENFK        | 66        |
| 1195 | hypothetical protein   | gi 31873324        | 6                  | 2                      | FKDIFQEIYDK       | 44        |
|      |                        |                    |                    |                        | SDYLNTFEFMDK      | 52        |
| 1196 | hypothetical protein   | gi 51476390        | 4                  | 2                      | YLVEIAR           | 38        |
|      |                        |                    |                    |                        | RHPYFYAPPELLFFAK  | 44        |
| 1197 | Human Serum Albumin    | gi 157830361       | 10                 | 4                      | RHPDYSVLLLLR      | 51        |
|      |                        |                    |                    |                        | KVPQVSTPTLVEVSR   | 47        |
|      |                        |                    |                    |                        | RPCFSALEVDETYVPK  | 73        |
|      |                        |                    |                    |                        | VFDEFKPLVEEPQNLIK | 95        |
| 1198 | albumin, isoform CRA_t | gi 119626083       | 6                  | 2                      | KVPQVSTPTLVEVSR   | 68        |
|      |                        |                    |                    |                        | VFDEFKPLVEEPQNLIK | 66        |
| 1199 | galectin-1             | gi 4504981         | 28                 | 3                      | DGGAWGTEQR        | 44        |

| No.  | Protein description                      | NCBI accession no. | Sequence coverage% | Matched peptide number | Peptide sequence      | Ion score |
|------|------------------------------------------|--------------------|--------------------|------------------------|-----------------------|-----------|
|      |                                          |                    |                    |                        | DSNNLCLHFNPR          | 85        |
|      |                                          |                    |                    |                        | LNLEAINYMAADGDFK      | 68        |
| 1200 | lamin A/C isoform 1 precursor            | gi 27436946        | 5                  | 3                      | NIYSEELR              | 42        |
|      |                                          |                    |                    |                        | SLETENAGLR            | 40        |
|      |                                          |                    |                    |                        | NSNLVGAAHEELQQSR      | 105       |
| 1201 | Glyceraldehyde-3-phosphate dehydrogenase | gi 67464043        | 15                 | 3                      | VPTANVSVDLTCR         | 118       |
|      |                                          |                    |                    |                        | LISWYDNEFGYSNR        | 78        |
|      |                                          |                    |                    |                        | VIISAPSADAPMFVMGVNHEK | 39        |
| 1202 | Glyceraldehyde-3-phosphate dehydrogenase | gi 67464043        | 8                  | 2                      | VPTANVSVDLTCR         | 37        |
|      |                                          |                    |                    |                        | LISWYDNEFGYSNR        | 61        |
| 1203 | Glyceraldehyde-3-phosphate dehydrogenase | gi 67464043        | 8                  | 2                      | VPTANVSVDLTCR         | 105       |
|      |                                          |                    |                    |                        | LISWYDNEFGYSNR        | 97        |
| 1204 | protein disulfide isomerase              | gi 860986          | 13                 | 4                      | FLQDYFDGNLK           | 37        |

| No.  | Protein description                       | NCBI accession no. | Sequence coverage% | Matched peptide number | Peptide sequence         | Ion score |
|------|-------------------------------------------|--------------------|--------------------|------------------------|--------------------------|-----------|
|      |                                           |                    |                    |                        | MDATANDVSPYEVR           | 61        |
|      |                                           |                    |                    |                        | VVVAENFDEIVNNENK         | 44        |
|      |                                           |                    |                    |                        | TFSHELSDFGLESTAGEIPVVAIR | 182       |
| 1205 | heat shock protein 27                     | gi 662841          | 21                 | 3                      | LFDQAFGLPR               | 65        |
|      |                                           |                    |                    |                        | VSLDVNHFAPDELTVK         | 57        |
|      |                                           |                    |                    |                        | LATQSNEITIPVTFESR        | 61        |
| 1206 | dimethylarginine dimethylaminohydrolase 2 | gi 123279699       | 25                 | 3                      | DFAVSTVPVSGPSHLR         | 82        |
|      |                                           |                    |                    |                        | GVPESLASGEGAGALPALDLAK   | 96        |
|      |                                           |                    |                    |                        | IVEIGDENATLDGTDVLTGR     | 140       |
| 1207 | 6-phosphogluconolactonase                 | gi 6912586         | 18                 | 3                      | ELPAAVAPAGPASLAR         | 82        |
|      |                                           |                    |                    |                        | IVAPISDSPKPPPQR          | 40        |
|      |                                           |                    |                    |                        | LVPFDHAESTYGLYR          | 90        |
| 1208 | endoplasmic reticulum protein 29          | gi 119618398       | 10                 | 2                      | ESYPVFYLFRR              | 67        |
|      |                                           |                    |                    |                        | ILDQGEDFPASEMTR          | 39        |
| 1209 | unnamed protein product                   | gi 194384036       | 16                 | 3                      | ALESPERPFLAILGGAK        | 58        |
|      |                                           |                    |                    |                        | VLNNMEIGTSLFDEEGAK       | 56        |

| No.  | Protein description          | NCBI accession no. | Sequence coverage% | Matched peptide number | Peptide sequence         | Ion score |
|------|------------------------------|--------------------|--------------------|------------------------|--------------------------|-----------|
|      |                              |                    |                    |                        | ITLPVDFVTADKFDENAK       | 79        |
| 1210 | Annexin A2                   | gi 73909156        | 12                 | 4                      | QDIAFAYQR                | 44        |
|      |                              |                    |                    |                        | GVDEVTIVNILTNR           | 80        |
|      |                              |                    |                    |                        | AEDGSVIDYELIDQDAR        | 83        |
|      |                              |                    |                    |                        | RAEDGSVIDYELIDQDAR       | 72        |
| 1211 | Superoxide dismutase [Cu-Zn] | gi 31615344        | 25                 | 2                      | GDGPVQGIINFEQK           | 83        |
|      |                              |                    |                    |                        | DGVADVSIEDSVISLSGDHCIIGR | 126       |
| 1212 | albumin preproprotein        | gi 4502027         | 8                  | 3                      | AVMDDFAAFVEK             | 56        |
|      |                              |                    |                    |                        | RPCFSALEVDETYVPK         | 83        |
|      |                              |                    |                    |                        | EFNAETFTFHADICTLSEK      | 64        |
| 1213 | Human Serum Albumin          | gi 157830361       | 11                 | 5                      | FQNALLVR                 | 46        |
|      |                              |                    |                    |                        | HPDYSVVLLLR              | 70        |
|      |                              |                    |                    |                        | KVPQVSTPTLVEVSR          | 47        |
|      |                              |                    |                    |                        | RPCFSALEVDETYVPK         | 73        |
|      |                              |                    |                    |                        | VFDEFKPLVEEPQQLIK        | 85        |
| 1214 | peptidylprolyl isomerase A   | gi 10863927        | 20                 | 2                      | SIYGKFEFENFILK           | 59        |

| No.  | Protein description     | NCBI accession no. | Sequence coverage% | Matched peptide number | Peptide sequence           | Ion score |
|------|-------------------------|--------------------|--------------------|------------------------|----------------------------|-----------|
|      |                         |                    |                    |                        | VNPTVFFDIAVDGEPLGR         | 128       |
| 1215 | mutant desmin           | gi 71011128        | 18                 | 6                      | VELQELNDR                  | 46        |
|      |                         |                    |                    |                        | VAELYEEELR                 | 60        |
|      |                         |                    |                    |                        | EEAENNLAAFR                | 71        |
|      |                         |                    |                    |                        | FASEASGYQDNIAR             | 101       |
|      |                         |                    |                    |                        | FLEQQNAALAAEVNR            | 153       |
|      |                         |                    |                    |                        | TPSSYGAGELLDVSLADAVNQEFLTR | 136       |
| 1216 | Tubulin, beta 2C        | gi 23958133        | 12                 | 4                      | FPGQLNADLR                 | 54        |
|      |                         |                    |                    |                        | INVYYNEATGGK               | 38        |
|      |                         |                    |                    |                        | AVLVDLEPGTMDSVR            | 47        |
|      |                         |                    |                    |                        | GHYTEGAELVDSVLDVVR         | 118       |
| 1217 | unnamed protein product | gi 35655           | 12                 | 4                      | YKPESEELTAER               | 88        |
|      |                         |                    |                    |                        | VDATEESDLAQQYGVR           | 103       |
|      |                         |                    |                    |                        | ILFIFIDSDHTDNQR            | 94        |
|      |                         |                    |                    |                        | HNQLPLVIEFTEQTAPK          | 66        |
| 1218 | mutant desmin           | gi 71011128        | 24                 | 7                      | VAELYEEELR                 | 72        |

| No.  | Protein description          | NCBI accession no. | Sequence coverage% | Matched peptide number | Peptide sequence            | Ion score |
|------|------------------------------|--------------------|--------------------|------------------------|-----------------------------|-----------|
|      |                              |                    |                    |                        | FASEASGYQDNIAR              | 123       |
|      |                              |                    |                    |                        | RIESLNEEIAFLK               | 48        |
|      |                              |                    |                    |                        | INLPIQTYSALNFR              | 92        |
|      |                              |                    |                    |                        | FLEQQNAALAAEVNR             | 132       |
|      |                              |                    |                    |                        | LQEEIQLKEEAENNLAAFR         | 142       |
|      |                              |                    |                    |                        | TPSSYGAGELLDNFLADAVNQEFLLTR | 126       |
| 1219 | beta-subunit (AA 1-312)      | gi 28931           | 9                  | 3                      | AHGGYSVFAGVGER              | 53        |
|      |                              |                    |                    |                        | DQEGQDVLLFIDNIFR            | 131       |
|      |                              |                    |                    |                        | AIAELGIYPAVDPLDSTSR         | 64        |
| 1220 | ALB protein                  | gi 23241675        | 10                 | 3                      | FQNALLVR                    | 37        |
|      |                              |                    |                    |                        | KVPQVSTPTLVEVSR             | 48        |
|      |                              |                    |                    |                        | VFDEFKPLVEEPQNLIK           | 82        |
| 1221 | albumin, isoform CRA_t       | gi 119626083       | 7                  | 3                      | FQNALLVR                    | 43        |
|      |                              |                    |                    |                        | HPDYSVLLLR                  | 77        |
|      |                              |                    |                    |                        | VFDEFKPLVEEPQNLIK           | 65        |
| 1222 | Apolipoprotein A-I precursor | gi 90108664        | 21                 | 5                      | AKPALEDLR                   | 44        |



| No.  | Protein description                    | NCBI accession no. | Sequence coverage% | Matched peptide number | Peptide sequence   | Ion score |
|------|----------------------------------------|--------------------|--------------------|------------------------|--------------------|-----------|
|      |                                        |                    |                    |                        | DEPPQSPWDR         | 64        |
|      |                                        |                    |                    |                        | THLAPYSDELK        | 76        |
|      |                                        |                    |                    |                        | VSFLSALEEYTK       | 49        |
|      |                                        |                    |                    |                        | DYVSQFEGSALGK      | 49        |
| 1223 | albumin, isoform CRA_t                 | gi 119626083       | 8                  | 4                      | HPDYSVVLLLR        | 45        |
|      |                                        |                    |                    |                        | RHPDYSVVLLLR       | 54        |
|      |                                        |                    |                    |                        | KVPQVSTPTLVEVSR    | 72        |
|      |                                        |                    |                    |                        | VFDEFKPLVEEPQNLIK  | 95        |
| 1224 | albumin, isoform CRA_t                 | gi 119626083       | 7                  | 3                      | FQNALLVR           | 51        |
|      |                                        |                    |                    |                        | KVPQVSTPTLVEVSR    | 76        |
|      |                                        |                    |                    |                        | VFDEFKPLVEEPQNLIK  | 85        |
| 1225 | actin, cytoplasmic 2                   | gi 4501887         | 13                 | 3                      | QEYDESGPSIVHR      | 86        |
|      |                                        |                    |                    |                        | SYELPDGQVITIGNER   | 130       |
|      |                                        |                    |                    |                        | VAPEEHPVLLTEAPLNPK | 77        |
| 1226 | Splicing factor proline/glutamine-rich | gi 29881667        | 4                  | 2                      | FGQGAGAPVGGQGPR    | 90        |
|      |                                        |                    |                    |                        | FAQHGTFEYYSQR      | 63        |

| No.  | Protein description                             | NCBI accession no. | Sequence coverage% | Matched peptide number | Peptide sequence  | Ion score |
|------|-------------------------------------------------|--------------------|--------------------|------------------------|-------------------|-----------|
| 1227 | Human Serum Albumin                             | gi 157830361       | 11                 | 6                      | FQNALLVR          | 48        |
|      |                                                 |                    |                    |                        | HPDYSVLLLLR       | 79        |
|      |                                                 |                    |                    |                        | RHPDYSVLLLLR      | 55        |
|      |                                                 |                    |                    |                        | KVPQVSTPTLVEVSR   | 84        |
|      |                                                 |                    |                    |                        | RPCFSALEVDETYVPK  | 70        |
|      |                                                 |                    |                    |                        | VFDEFKPLVEEPQNLIK | 54        |
| 1228 | Human Serum Albumin                             | gi 157830361       | 11                 | 6                      | FQNALLVR          | 38        |
|      |                                                 |                    |                    |                        | HPDYSVLLLLR       | 37        |
|      |                                                 |                    |                    |                        | VPQVSTPTLVEVSR    | 42        |
|      |                                                 |                    |                    |                        | KVPQVSTPTLVEVSR   | 70        |
|      |                                                 |                    |                    |                        | RPCFSALEVDETYVPK  | 38        |
|      |                                                 |                    |                    |                        | VFDEFKPLVEEPQNLIK | 74        |
| 1229 | lipoamide dehydrogenase precursor old gene name | gi 307137          | 6                  | 2                      | VCHAHPTLSEAFR     | 65        |
|      |                                                 |                    |                    |                        | AEVITCDVLLVCIGR   | 82        |
| 1230 | LAP3                                            | gi 48146373        | 4                  | 2                      | TLIEFLLR          | 48        |

| No.  | Protein description           | NCBI accession no. | Sequence coverage% | Matched peptide number | Peptide sequence | Ion score |
|------|-------------------------------|--------------------|--------------------|------------------------|------------------|-----------|
|      |                               |                    |                    |                        | GVLFASGQNLAR     | 65        |
| 1231 | LAP3                          | gi 48146373        | 7                  | 3                      | TLIEFLLR         | 64        |
|      |                               |                    |                    |                        | GVLFASGQNLAR     | 90        |
|      |                               |                    |                    |                        | LILADALCYAHTFNP  | 88        |
| 1232 | aconitase precursor           | gi 3600098         | 9                  | 4                      | SQFTITPGSEQIR    | 91        |
|      |                               |                    |                    |                        | FKLEAPDADELPR    | 118       |
|      |                               |                    |                    |                        | NAVTQEFQVPDTR    | 93        |
|      |                               |                    |                    |                        | WVIGDENYEGSSR    | 74        |
| 1233 | aconitase precursor           | gi 3600098         | 11                 | 5                      | EGWPLDIR         | 60        |
|      |                               |                    |                    |                        | SQFTITPGSEQIR    | 88        |
|      |                               |                    |                    |                        | FKLEAPDADELPR    | 101       |
|      |                               |                    |                    |                        | NAVTQEFQVPDTR    | 117       |
|      |                               |                    |                    |                        | WVIGDENYEGSSR    | 129       |
| 1234 | outer dense fiber protein 2/2 | gi 2996006         | 7                  | 5                      | NIDLTAISDLR      | 60        |
|      |                               |                    |                    |                        | KNIDLTAISDLR     | 68        |
|      |                               |                    |                    |                        | TRLEADEVAAQLR    | 89        |

| No.  | Protein description                        | NCBI accession no. | Sequence coverage% | Matched peptide number | Peptide sequence        | Ion score |
|------|--------------------------------------------|--------------------|--------------------|------------------------|-------------------------|-----------|
|      |                                            |                    |                    |                        | LAECQDQLQGYER           | 74        |
|      |                                            |                    |                    |                        | KEELEEVAHELAETEHEENTVLR | 208       |
| 1235 | oxygen regulated protein precursor variant | gi 62897071        | 6                  | 4                      | AHFNLDSEGVLSLDR         | 106       |
|      |                                            |                    |                    |                        | LYQPEYQEVSTEEQR         | 90        |
|      |                                            |                    |                    |                        | LYQPEYQEVSTEEQREEISGK   | 80        |
|      |                                            |                    |                    |                        | YSHDFNFHINYGDLGFLGPEDLR | 86        |
| 1236 | mitochondrial ATP synthase                 | gi 89574029        | 17                 | 5                      | AHGGYSVFAGVGER          | 97        |
|      |                                            |                    |                    |                        | VALTGLTVAEYFR           | 46        |
|      |                                            |                    |                    |                        | LVLEVAQHLGESTVR         | 94        |
|      |                                            |                    |                    |                        | DQEGQDVLLFIDNIFR        | 85        |
|      |                                            |                    |                    |                        | AIAELGIYPAVDPLDSTSR     | 102       |
| 1237 | calreticulin precursor variant             | gi 62897681        | 8                  | 2                      | KVHVIFNYK               | 54        |
|      |                                            |                    |                    |                        | CKDDEFTHLYTLIVRPDNTYEVK | 85        |
| 1238 | actin, cytoplasmic 2                       | gi 4501887         | 15                 | 4                      | AGFAGDDAPR              | 51        |
|      |                                            |                    |                    |                        | QEYDESGPSIVHR           | 100       |
|      |                                            |                    |                    |                        | SYELPDGQVITIGNER        | 135       |

| No.  | Protein description                             | NCBI accession no. | Sequence coverage% | Matched peptide number | Peptide sequence        | Ion score |
|------|-------------------------------------------------|--------------------|--------------------|------------------------|-------------------------|-----------|
|      |                                                 |                    |                    |                        | VAPEEHPVLLTEAPLNPK      | 95        |
| 1239 | calreticulin precursor variant                  | gi 62897681        | 8                  | 2                      | KVHVIFNYK               | 53        |
|      |                                                 |                    |                    |                        | CKDDEFTHLYTLIVRPDNTYEVK | 111       |
| 1240 | protein disulfide isomerase-related protein 5   | gi 1710248         | 16                 | 4                      | TGEAIVDAALSALR          | 88        |
|      |                                                 |                    |                    |                        | LAAVDATVNQVLASR         | 62        |
|      |                                                 |                    |                    |                        | LYSSDDVIELTPSNFNR       | 128       |
|      |                                                 |                    |                    |                        | ALDLFSDNAPPELLEIINEDIAK | 56        |
| 1241 | outer dense fiber protein 2/2                   | gi 2996006         | 5                  | 4                      | NIDLTAISDLR             | 78        |
|      |                                                 |                    |                    |                        | KNIDLTAISDLR            | 88        |
|      |                                                 |                    |                    |                        | TRLEADEVAAQLER          | 51        |
|      |                                                 |                    |                    |                        | LAECQDQLQGYER           | 81        |
| 1242 | hypothetical protein                            | gi 31873302        | 9                  | 2                      | AAVPSGASTGIYEALELR      | 131       |
|      |                                                 |                    |                    |                        | AGYTDKVVIGMDVAASEFFR    | 63        |
| 1243 | Aldehyde dehydrogenase, mitochondrial precursor | gi 6137677         | 4                  | 2                      | TIEEVVGR                | 46        |

| No.  | Protein description         | NCBI accession no. | Sequence coverage% | Matched peptide number | Peptide sequence         | Ion score |
|------|-----------------------------|--------------------|--------------------|------------------------|--------------------------|-----------|
|      |                             |                    |                    |                        | TIPIDGFFSYTR             | 98        |
| 1244 | endoplasmin precursor       | gi 4507677         | 5                  | 3                      | FAFQAEVNR                | 42        |
|      |                             |                    |                    |                        | SILFVPTSAPR              | 47        |
|      |                             |                    |                    |                        | TDDEVVQREEEAIQLDGLNASQIR | 70        |
| 1245 | actin, aortic smooth muscle | gi 4501883         | 16                 | 4                      | GYSFVTTAER               | 47        |
|      |                             |                    |                    |                        | QEYDEAGPSIVHR            | 101       |
|      |                             |                    |                    |                        | SYELPDGQVITIGNER         | 153       |
|      |                             |                    |                    |                        | DLYANNVLSGGTTMYPGIADR    | 50        |
| 1246 | malate dehydrogenase 1      | gi 119620368       | 11                 | 2                      | FVEGLPINDFSR             | 84        |
|      |                             |                    |                    |                        | NVIIWGNHSSTQYPDVNHAK     | 82        |
| 1247 | Aldehyde Reductase          | gi 157834561       | 14                 | 3                      | DAGHPLYPFNDPY            | 81        |
|      |                             |                    |                    |                        | GLEVTAYSPLGSSDR          | 68        |
|      |                             |                    |                    |                        | ILQNIKVFDFTFSPPEEMK      | 48        |
| 1248 | PGK1                        | gi 48145549        | 23                 | 5                      | LGDVYVNDAFGTAHR          | 72        |
|      |                             |                    |                    |                        | ALESPERPFLAILGGAK        | 62        |
|      |                             |                    |                    |                        | ITLPVDFVTADKFDENAK       | 71        |

| No.  | Protein description                      | NCBI accession no. | Sequence coverage% | Matched peptide number | Peptide sequence            | Ion score |
|------|------------------------------------------|--------------------|--------------------|------------------------|-----------------------------|-----------|
|      |                                          |                    |                    |                        | QIVWNGPVGVFWEAFAR           | 62        |
|      |                                          |                    |                    |                        | DCVGPEVEKACANPAAGSVILLENLR  | 63        |
| 1249 | pyruvate dehydrogenase E1-beta subunit   | gi 189762          | 11                 | 2                      | IMEGPAFNFLDAPAVR            | 72        |
|      |                                          |                    |                    |                        | TNHLVTVEGGWPQFGVGAEICAR     | 90        |
| 1250 | calmodulin                               | gi 825635          | 46                 | 4                      | DTDSEEEIREAFR               | 73        |
|      |                                          |                    |                    |                        | VFDKDGNGYISAAELR            | 135       |
|      |                                          |                    |                    |                        | EAFSLFDKDGDTITTK            | 143       |
|      |                                          |                    |                    |                        | EADIDGDGQVNYEEFVQMMTAK      | 97        |
| 1251 | actin, alpha cardiac muscle 1 proprotein | gi 4885049         | 15                 | 4                      | AVFPSIVGRPR                 | 52        |
|      |                                          |                    |                    |                        | QEYDEAGPSIVHR               | 101       |
|      |                                          |                    |                    |                        | SYELPDGQVITIGNER            | 130       |
|      |                                          |                    |                    |                        | VAPEEHPTLLTEAPLNPK          | 79        |
| 1252 | MYL6 protein                             | gi 113812151       | 33                 | 4                      | EAFQLFDR                    | 47        |
|      |                                          |                    |                    |                        | NKDQGTIEDYVEGLR             | 77        |
|      |                                          |                    |                    |                        | MTEEEVEMLVAGHEDSNGCINYEELVR | 64        |
|      |                                          |                    |                    |                        | MTEEEVEMLVAGHEDSNGCINYEELVR | 67        |

| No.  | Protein description                    | NCBI accession no. | Sequence coverage% | Matched peptide number | Peptide sequence       | Ion score |
|------|----------------------------------------|--------------------|--------------------|------------------------|------------------------|-----------|
| 1253 | hypothetical protein                   | gi 11276938        | 6                  | 3                      | FYPEDVAEELIQDITQK      | 77        |
|      |                                        |                    |                    |                        | VTTMDAELEFAIQPNTTGK    | 42        |
|      |                                        |                    |                    |                        | AKFYPEDVAEELIQDITQK    | 51        |
| 1254 | Tubulin, beta 2C                       | gi 23958133        | 7                  | 3                      | INVYYNEATGGK           | 46        |
|      |                                        |                    |                    |                        | GHYTEGAELVDSVLDVVR     | 139       |
|      |                                        |                    |                    |                        | GHYTEGAELVDSVLDVVRK    | 44        |
| 1255 | tropomyosin 2 (beta) isoform 2 variant | gi 62898077        | 14                 | 4                      | LVILEGELER             | 41        |
|      |                                        |                    |                    |                        | IQLVEEELDR             | 80        |
|      |                                        |                    |                    |                        | KLVILEGELER            | 86        |
|      |                                        |                    |                    |                        | EENVEIHQTLDQTLLELNNL   | 164       |
| 1256 | chaperonin containing TCP1             | gi 119617636       | 20                 | 5                      | QVLLSAAEAAEVILR        | 84        |
|      |                                        |                    |                    |                        | LIHFSGVALGEACTIVLR     | 40        |
|      |                                        |                    |                    |                        | LALVTGGEIASTFDHPELVK   | 76        |
|      |                                        |                    |                    |                        | VQDDEVGDGTTSVTVLAAELLR | 163       |
|      |                                        |                    |                    |                        | MLPTIIADNAGYDSADLVAQLR | 93        |
| 1257 | actin, alpha skeletal muscle           | gi 4501881         | 6                  | 2                      | AGFAGDDAPR             | 41        |



| No.  | Protein description                         | NCBI accession no. | Sequence coverage% | Matched peptide number | Peptide sequence        | Ion score |
|------|---------------------------------------------|--------------------|--------------------|------------------------|-------------------------|-----------|
|      |                                             |                    |                    |                        | AVFPSIVGRPR             | 51        |
| 1258 | actin, aortic smooth muscle                 | gi 4501883         | 8                  | 2                      | QEYDEAGPSIVHR           | 86        |
|      |                                             |                    |                    |                        | SYELPDGQVITIGNER        | 132       |
| 1259 | heat shock cognate 71 kDa protein isoform 1 | gi 5729877         | 7                  | 2                      | SINPDEAVAYGAAVQAAILSGDK | 115       |
|      |                                             |                    |                    |                        | QTQTFTTYSNQPGLIQVYEGER  | 155       |
| 1260 | unnamed protein product                     | gi 37403           | 14                 | 5                      | IQLVEEELDR              | 39        |
|      |                                             |                    |                    |                        | KLVIIEGDLER             | 44        |
|      |                                             |                    |                    |                        | IQVLQQQADDAEER          | 56        |
|      |                                             |                    |                    |                        | IQLVEEELDRAQER          | 47        |
|      |                                             |                    |                    |                        | KIQVLQQQADDAEER         | 75        |

**Part III: The observed precursor mass , charge and the labeled MS/MS spectrum of the 32 single-peptide identified proteins.**

1261

MS/MS Fragmentation of SLGVAAEGLPDQYADGEAAR

Found in gi|55669632, Chain A, Crystal Structure Of Human Glycine N-Methyltransferase, (1990.0756,1+)

Ions Score: 135

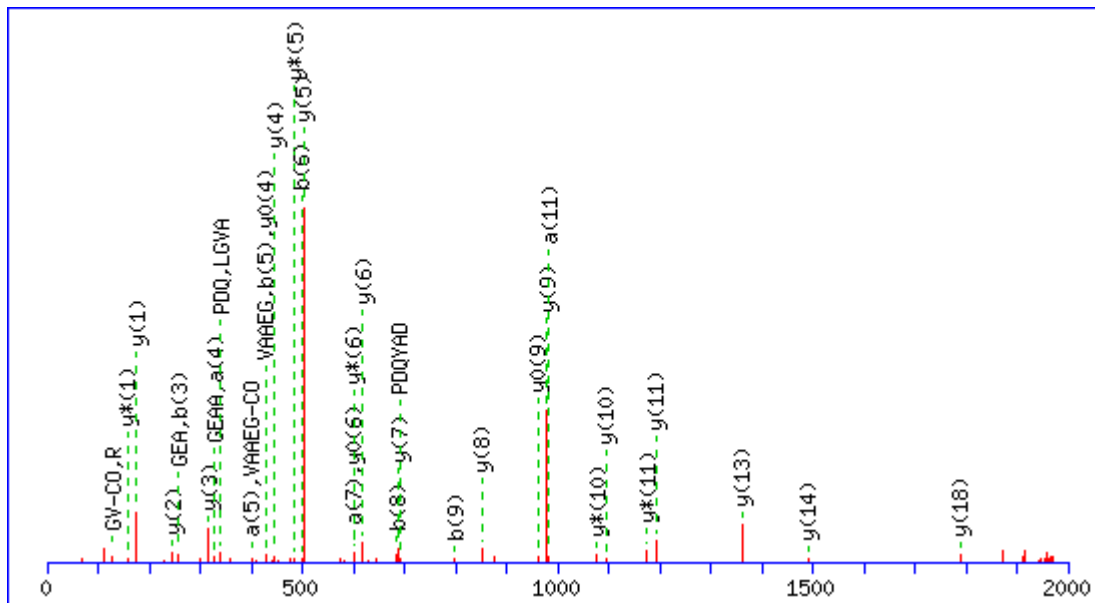

| # | Immon.  | a        | a* | a <sup>0</sup> | b        | b* | b <sup>0</sup> | Seq. | v             | w             | y             | y*            | y <sup>0</sup> | #  |
|---|---------|----------|----|----------------|----------|----|----------------|------|---------------|---------------|---------------|---------------|----------------|----|
| 1 | 60.0444 | 60.0444  |    | 42.0338        | 88.0393  |    | 70.0287        | S    |               |               |               |               |                | 20 |
| 2 | 86.0964 | 173.1285 |    | 155.1179       | 201.1234 |    | 183.1128       | L    | 1844.840<br>9 | 1843.845<br>7 | 1902.919<br>2 | 1885.892<br>7 | 1884.908<br>6  | 19 |
| 3 | 30.0338 | 230.1499 |    | 212.1394       | 258.1448 |    | 240.1343       | G    |               |               | 1789.835<br>1 | 1772.808<br>6 | 1771.824<br>6  | 18 |
| 4 | 72.0808 | 329.2183 |    | 311.2078       | 357.2132 |    | 339.2027       | V    | 1688.751      | 1701.771      | 1732.813      | 1715.787      | 1714.803       | 17 |

|           |          |                 |               |               |                 |               |               |          |               |               |                       |                       |                 |           |
|-----------|----------|-----------------|---------------|---------------|-----------------|---------------|---------------|----------|---------------|---------------|-----------------------|-----------------------|-----------------|-----------|
|           |          |                 |               |               |                 |               |               |          | 1             | 5             | 7                     | 1                     | 1               |           |
| <b>5</b>  | 44.0495  | <b>400.2554</b> |               | 382.2449      | <b>428.2504</b> |               | 410.2398      | <b>A</b> | 1617.714<br>0 |               | 1633.745<br>3         | 1616.718<br>7         | 1615.734<br>7   | <b>16</b> |
| <b>6</b>  | 44.0495  | 471.2926        |               | 453.2820      | <b>499.2875</b> |               | 481.2769      | <b>A</b> | 1546.676<br>8 |               | 1562.708<br>1         | 1545.681<br>6         | 1544.697<br>6   | <b>15</b> |
| <b>7</b>  | 102.0550 | <b>600.3352</b> |               | 582.3246      | 628.3301        |               | 610.3195      | <b>E</b> | 1417.634<br>3 | 1416.639<br>0 | <b>1491.671<br/>0</b> | 1474.644<br>5         | 1473.660<br>5   | <b>14</b> |
| <b>8</b>  | 30.0338  | 657.3566        |               | 639.3461      | <b>685.3515</b> |               | 667.3410      | <b>G</b> |               |               | <b>1362.628<br/>4</b> | 1345.601<br>9         | 1344.617<br>9   | <b>13</b> |
| <b>9</b>  | 86.0964  | 770.4407        |               | 752.4301      | <b>798.4356</b> |               | 780.4250      | <b>L</b> | 1247.528<br>7 | 1246.533<br>5 | 1305.607<br>0         | 1288.580<br>4         | 1287.596<br>4   | <b>12</b> |
| <b>10</b> | 70.0651  | 867.4934        |               | 849.4829      | 895.4884        |               | 877.4778      | <b>P</b> | 1150.476<br>0 | 1149.480<br>7 | <b>1192.522<br/>9</b> | <b>1175.496<br/>4</b> | 1174.512<br>3   | <b>11</b> |
| <b>11</b> | 88.0393  | <b>982.5204</b> |               | 964.5098      | 1010.515<br>3   |               | 992.5047      | <b>D</b> | 1035.449<br>0 | 1034.453<br>8 | <b>1095.470<br/>1</b> | <b>1078.443<br/>6</b> | 1077.459<br>6   | <b>10</b> |
| <b>12</b> | 101.0709 | 1110.579<br>0   | 1093.552<br>4 | 1092.568<br>4 | 1138.573<br>9   | 1121.547<br>3 | 1120.563<br>3 | <b>Q</b> | 907.3904      | 906.3952      | <b>980.4432</b>       | 963.4167              | <b>962.4326</b> | <b>9</b>  |
| <b>13</b> | 136.0757 | 1273.642<br>3   | 1256.615<br>7 | 1255.631<br>7 | 1301.637<br>2   | 1284.610<br>7 | 1283.626<br>6 | <b>Y</b> | 744.3271      |               | <b>852.3846</b>       | 835.3581              | 834.3741        | <b>8</b>  |
| <b>14</b> | 44.0495  | 1344.679<br>4   | 1327.652<br>9 | 1326.668<br>8 | 1372.674<br>3   | 1355.647<br>8 | 1354.663<br>8 | <b>A</b> | 673.2900      |               | <b>689.3213</b>       | 672.2947              | 671.3107        | <b>7</b>  |
| <b>15</b> | 88.0393  | 1459.706<br>4   | 1442.679<br>8 | 1441.695<br>8 | 1487.701<br>3   | 1470.674<br>7 | 1469.690<br>7 | <b>D</b> | 558.2631      | 557.2678      | <b>618.2842</b>       | <b>601.2576</b>       | <b>600.2736</b> | <b>6</b>  |
| <b>16</b> | 30.0338  | 1516.727<br>8   | 1499.701<br>3 | 1498.717<br>3 | 1544.722<br>7   | 1527.696<br>2 | 1526.712<br>2 | <b>G</b> |               |               | <b>503.2572</b>       | <b>486.2307</b>       | 485.2467        | <b>5</b>  |
| <b>17</b> | 102.0550 | 1645.770<br>4   | 1628.743<br>9 | 1627.759<br>8 | 1673.765<br>3   | 1656.738<br>8 | 1655.754<br>8 | <b>E</b> | 372.1990      | 371.2037      | <b>446.2358</b>       | 429.2092              | <b>428.2252</b> | <b>4</b>  |

|    |          |           |           |           |           |           |           |   |          |         |          |          |  |  |   |
|----|----------|-----------|-----------|-----------|-----------|-----------|-----------|---|----------|---------|----------|----------|--|--|---|
| 18 | 44.0495  | 1716.8075 | 1699.7810 | 1698.7970 | 1744.8024 | 1727.7759 | 1726.7919 | A | 301.1619 |         | 317.1932 | 300.1666 |  |  | 3 |
| 19 | 44.0495  | 1787.8446 | 1770.8181 | 1769.8341 | 1815.8396 | 1798.8130 | 1797.8290 | A | 230.1248 |         | 246.1561 | 229.1295 |  |  | 2 |
| 20 | 129.1135 |           |           |           |           |           |           | R | 74.0237  | 73.0284 | 175.1190 | 158.0924 |  |  | 1 |

1262

MS/MS Fragmentation of AFYVNVLNNEEQR

Found in gi|7245756, Chain A, Human Erythrocyte Catalase,

(1481.7946,1+)

Ions Score: 40

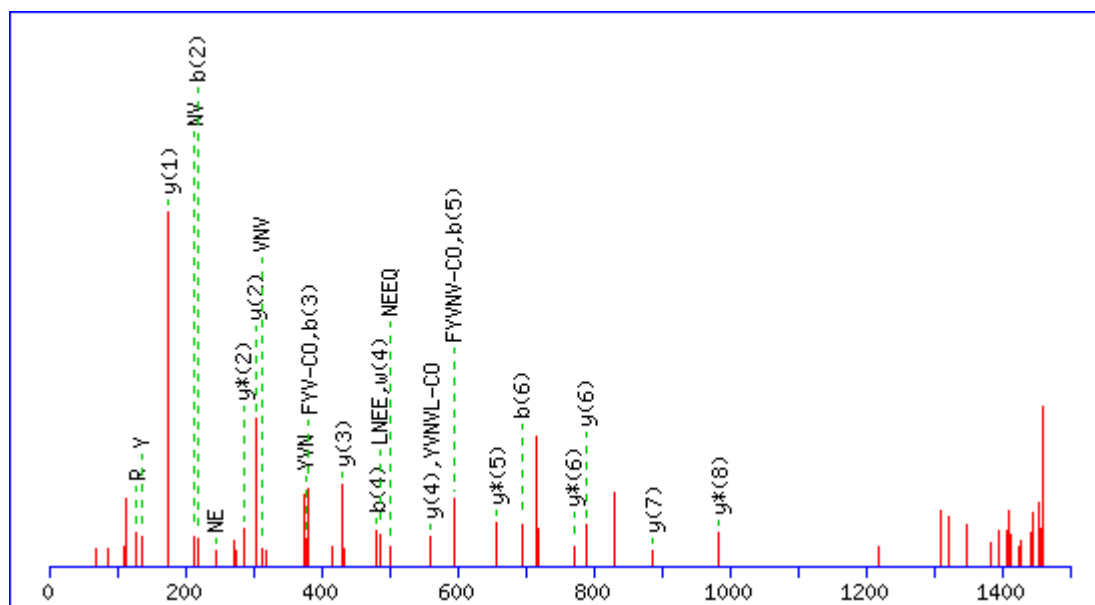

| # | Immon. | a | a* | a <sup>0</sup> | b | b* | b <sup>0</sup> | Seq. | v | w | y | y* | y <sup>0</sup> | # |
|---|--------|---|----|----------------|---|----|----------------|------|---|---|---|----|----------------|---|
|---|--------|---|----|----------------|---|----|----------------|------|---|---|---|----|----------------|---|

|    |          |               |               |               |               |               |               |  |   |               |               |               |               |               |    |
|----|----------|---------------|---------------|---------------|---------------|---------------|---------------|--|---|---------------|---------------|---------------|---------------|---------------|----|
| 1  | 44.0495  | 44.0495       |               |               | 72.0444       |               |               |  | A |               |               |               |               |               | 12 |
| 2  | 120.0808 | 191.1179      |               |               | 219.1128      |               |               |  | F | 1318.638<br>6 |               | 1410.701<br>2 | 1393.674<br>7 | 1392.690<br>6 | 11 |
| 3  | 136.0757 | 354.1812      |               |               | 382.1761      |               |               |  | Y | 1155.575<br>3 |               | 1263.632<br>8 | 1246.606<br>2 | 1245.622<br>2 | 10 |
| 4  | 72.0808  | 453.2496      |               |               | 481.2445      |               |               |  | V | 1056.506<br>9 | 1069.527<br>3 | 1100.569<br>5 | 1083.542<br>9 | 1082.558<br>9 | 9  |
| 5  | 87.0553  | 567.2926      | 550.2660      |               | 595.2875      | 578.2609      |               |  | N | 942.4639      | 941.4687      | 1001.501<br>0 | 984.4745      | 983.4905      | 8  |
| 6  | 72.0808  | 666.3610      | 649.3344      |               | 694.3559      | 677.3293      |               |  | V | 843.3955      | 856.4159      | 887.4581      | 870.4316      | 869.4476      | 7  |
| 7  | 86.0964  | 779.4450      | 762.4185      |               | 807.4400      | 790.4134      |               |  | L | 730.3115      | 729.3162      | 788.3897      | 771.3632      | 770.3791      | 6  |
| 8  | 87.0553  | 893.4880      | 876.4614      |               | 921.4829      | 904.4563      |               |  | N | 616.2685      | 615.2733      | 675.3056      | 658.2791      | 657.2951      | 5  |
| 9  | 102.0550 | 1022.530<br>6 | 1005.504<br>0 | 1004.520<br>0 | 1050.525<br>5 | 1033.498<br>9 | 1032.514<br>9 |  | E | 487.2259      | 486.2307      | 561.2627      | 544.2362      | 543.2522      | 4  |
| 10 | 102.0550 | 1151.573<br>2 | 1134.546<br>6 | 1133.562<br>6 | 1179.568<br>1 | 1162.541<br>5 | 1161.557<br>5 |  | E | 358.1833      | 357.1881      | 432.2201      | 415.1936      | 414.2096      | 3  |
| 11 | 101.0709 | 1279.631<br>7 | 1262.605<br>2 | 1261.621<br>2 | 1307.626<br>6 | 1290.600<br>1 | 1289.616<br>1 |  | Q | 230.1248      | 229.1295      | 303.1775      | 286.1510      |               | 2  |
| 12 | 129.1135 |               |               |               |               |               |               |  | R | 74.0237       | 73.0284       | 175.1190      | 158.0924      |               | 1  |

1263

MS/MS Fragmentation of ADFDNTVAIHPTSSEELVTLR

Found in gi|157830846, Chain A, Human Glutathione Reductase,

(2315.2935,1+)

Ions Score: 113

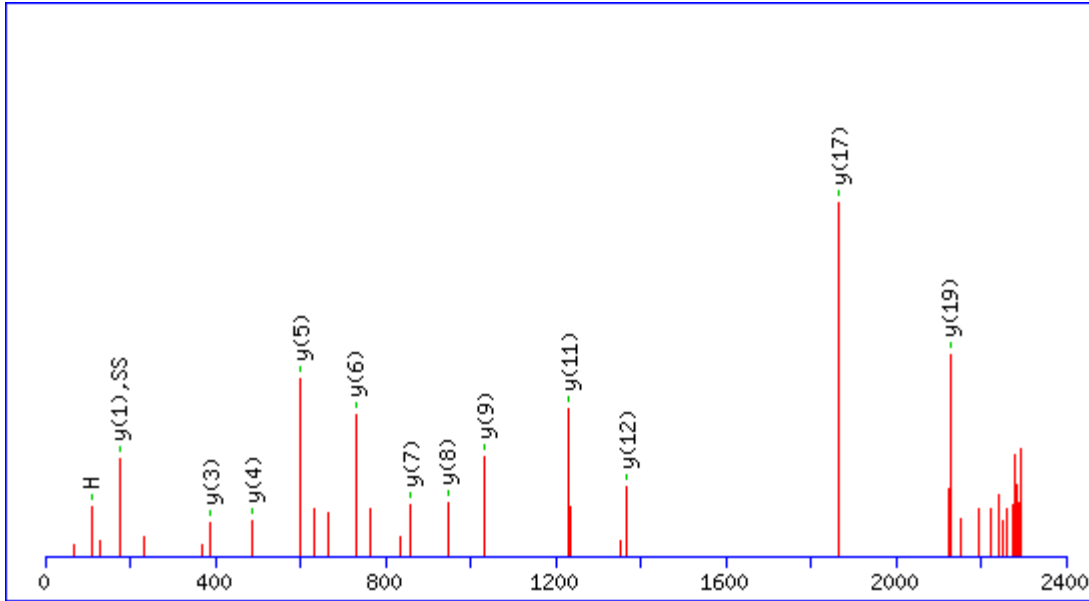

| # | Immon        | a            | a*           | a <sup>0</sup> | b            | b*           | b <sup>0</sup> | Seq. | v             | w             | w'            | y             | y*            | y <sup>0</sup> | #  |
|---|--------------|--------------|--------------|----------------|--------------|--------------|----------------|------|---------------|---------------|---------------|---------------|---------------|----------------|----|
| 1 | 44.049<br>5  | 44.049<br>5  |              |                | 72.044<br>4  |              |                | A    |               |               |               |               |               |                | 21 |
| 2 | 88.039<br>3  | 159.07<br>64 |              | 141.06<br>59   | 187.07<br>13 |              | 169.06<br>08   | D    | 2184.0<br>931 | 2183.0<br>979 |               | 2244.1<br>143 | 2227.0<br>877 | 2226.1<br>037  | 20 |
| 3 | 120.08<br>08 | 306.14<br>48 |              | 288.13<br>43   | 334.13<br>97 |              | 316.12<br>92   | F    | 2037.0<br>247 |               |               | 2129.0<br>873 | 2112.0<br>608 | 2111.0<br>768  | 19 |
| 4 | 88.039<br>3  | 421.17<br>18 |              | 403.16<br>12   | 449.16<br>67 |              | 431.15<br>61   | D    | 1921.9<br>978 | 1921.0<br>025 |               | 1982.0<br>189 | 1964.9<br>924 | 1964.0<br>083  | 18 |
| 5 | 87.055<br>3  | 535.21<br>47 | 518.18<br>82 | 517.20<br>41   | 563.20<br>96 | 546.18<br>31 | 545.19<br>91   | N    | 1807.9<br>549 | 1806.9<br>596 |               | 1866.9<br>920 | 1849.9<br>654 | 1848.9<br>814  | 17 |
| 6 | 74.060<br>0  | 636.26<br>24 | 619.23<br>58 | 618.25<br>18   | 664.25<br>73 | 647.23<br>07 | 646.24<br>67   | T    | 1706.9<br>072 | 1719.9<br>276 | 1721.9<br>068 | 1752.9<br>490 | 1735.9<br>225 | 1734.9<br>385  | 16 |

|    |                            |               |               |               |               |               |               |   |               |               |               |                             |               |               |    |
|----|----------------------------|---------------|---------------|---------------|---------------|---------------|---------------|---|---------------|---------------|---------------|-----------------------------|---------------|---------------|----|
| 7  | 72.080<br>8                | 735.33<br>08  | 718.30<br>42  | 717.32<br>02  | 763.32<br>57  | 746.29<br>92  | 745.31<br>51  | V | 1607.8<br>388 | 1620.8<br>592 |               | 1651.9<br>014               | 1634.8<br>748 | 1633.8<br>908 | 15 |
| 8  | 44.049<br>5                | 806.36<br>79  | 789.34<br>14  | 788.35<br>73  | 834.36<br>28  | 817.33<br>63  | 816.35<br>23  | A | 1536.8<br>016 |               |               | 1552.8<br>329               | 1535.8<br>064 | 1534.8<br>224 | 14 |
| 9  | 86.096<br>4                | 919.45<br>20  | 902.42<br>54  | 901.44<br>14  | 947.44<br>69  | 930.42<br>03  | 929.43<br>63  | I | 1423.7<br>176 | 1436.7<br>380 | 1450.7<br>536 | 1481.7<br>958               | 1464.7<br>693 | 1463.7<br>853 | 13 |
| 10 | <b>110.07</b><br><b>13</b> | 1056.5<br>109 | 1039.4<br>843 | 1038.5<br>003 | 1084.5<br>058 | 1067.4<br>793 | 1066.4<br>952 | H | 1286.6<br>587 |               |               | <b>1368.7</b><br><b>118</b> | 1351.6<br>852 | 1350.7<br>012 | 12 |
| 11 | 70.065<br>1                | 1153.5<br>636 | 1136.5<br>371 | 1135.5<br>531 | 1181.5<br>586 | 1164.5<br>320 | 1163.5<br>480 | P | 1189.6<br>059 | 1188.6<br>107 |               | <b>1231.6</b><br><b>529</b> | 1214.6<br>263 | 1213.6<br>423 | 11 |
| 12 | 74.060<br>0                | 1254.6<br>113 | 1237.5<br>848 | 1236.6<br>008 | 1282.6<br>062 | 1265.5<br>797 | 1264.5<br>957 | T | 1088.5<br>582 | 1101.5<br>786 | 1103.5<br>579 | 1134.6<br>001               | 1117.5<br>735 | 1116.5<br>895 | 10 |
| 13 | 60.044<br>4                | 1341.6<br>434 | 1324.6<br>168 | 1323.6<br>328 | 1369.6<br>383 | 1352.6<br>117 | 1351.6<br>277 | S | 1001.5<br>262 | 1000.5<br>310 |               | <b>1033.5</b><br><b>524</b> | 1016.5<br>259 | 1015.5<br>419 | 9  |
| 14 | 60.044<br>4                | 1428.6<br>754 | 1411.6<br>488 | 1410.6<br>648 | 1456.6<br>703 | 1439.6<br>438 | 1438.6<br>597 | S | 914.49<br>42  | 913.49<br>89  |               | <b>946.52</b><br><b>04</b>  | 929.49<br>38  | 928.50<br>98  | 8  |
| 15 | 102.05<br>50               | 1557.7<br>180 | 1540.6<br>914 | 1539.7<br>074 | 1585.7<br>129 | 1568.6<br>863 | 1567.7<br>023 | E | 785.45<br>16  | 784.45<br>63  |               | <b>859.48</b><br><b>84</b>  | 842.46<br>18  | 841.47<br>78  | 7  |
| 16 | 102.05<br>50               | 1686.7<br>606 | 1669.7<br>340 | 1668.7<br>500 | 1714.7<br>555 | 1697.7<br>289 | 1696.7<br>449 | E | 656.40<br>90  | 655.41<br>37  |               | <b>730.44</b><br><b>58</b>  | 713.41<br>92  | 712.43<br>52  | 6  |
| 17 | 86.096<br>4                | 1799.8<br>446 | 1782.8<br>181 | 1781.8<br>341 | 1827.8<br>395 | 1810.8<br>130 | 1809.8<br>290 | L | 543.32<br>49  | 542.32<br>97  |               | <b>601.40</b><br><b>32</b>  | 584.37<br>66  | 583.39<br>26  | 5  |
| 18 | 72.080<br>8                | 1898.9<br>130 | 1881.8<br>865 | 1880.9<br>025 | 1926.9<br>080 | 1909.8<br>814 | 1908.8<br>974 | V | 444.25<br>65  | 457.27<br>69  |               | <b>488.31</b><br><b>91</b>  | 471.29<br>26  | 470.30<br>85  | 4  |
| 19 | 74.060<br>0                | 1999.9<br>607 | 1982.9<br>342 | 1981.9<br>502 | 2027.9<br>556 | 2010.9<br>291 | 2009.9<br>451 | T | 343.20<br>88  | 356.22<br>92  | 358.20<br>85  | <b>389.25</b><br><b>07</b>  | 372.22<br>41  | 371.24<br>01  | 3  |

|    |              |               |               |               |               |               |               |   |              |              |  |              |              |  |   |
|----|--------------|---------------|---------------|---------------|---------------|---------------|---------------|---|--------------|--------------|--|--------------|--------------|--|---|
| 20 | 86.096<br>4  | 2113.0<br>448 | 2096.0<br>182 | 2095.0<br>342 | 2141.0<br>397 | 2124.0<br>132 | 2123.0<br>291 | L | 230.12<br>48 | 229.12<br>95 |  | 288.20<br>30 | 271.17<br>65 |  | 2 |
| 21 | 129.11<br>35 |               |               |               |               |               |               | R | 74.023<br>7  | 73.028<br>4  |  | 175.11<br>90 | 158.09<br>24 |  | 1 |

1264

MS/MS Fragmentation of EFSITDVVPYISLR

Found in gi|4579909, apg-2,

(1735.9844,1+)

Ions Score: 41

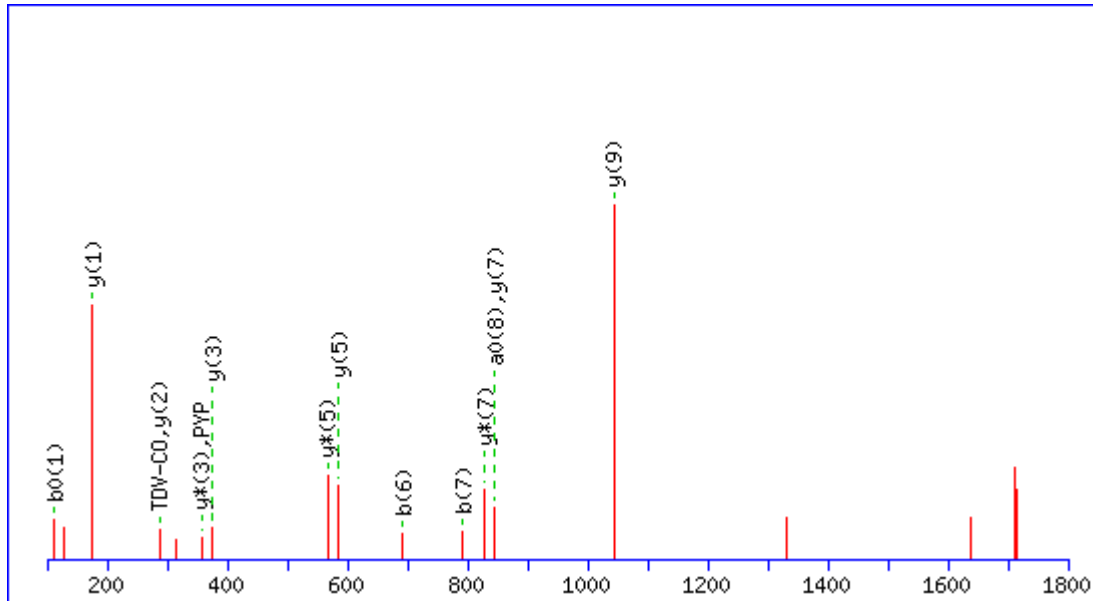



| #         | Immon.       | a             | a <sup>0</sup>             | b                          | b <sup>0</sup>             | Seq.     | v             | w             | w'            | y                           | y*                         | y <sup>0</sup> | #         |
|-----------|--------------|---------------|----------------------------|----------------------------|----------------------------|----------|---------------|---------------|---------------|-----------------------------|----------------------------|----------------|-----------|
| <b>1</b>  | 102.055<br>0 | 102.055<br>0  | 84.0444                    | 130.049<br>9               | <b>112.039</b><br><b>3</b> | <b>E</b> |               |               |               |                             |                            |                | <b>15</b> |
| <b>2</b>  | 120.080<br>8 | 249.123<br>4  | 231.112<br>8               | 277.118<br>3               | 259.107<br>7               | <b>F</b> | 1514.82<br>13 |               |               | 1606.88<br>39               | 1589.85<br>74              | 1588.87<br>34  | <b>14</b> |
| <b>3</b>  | 60.0444      | 336.155<br>4  | 318.144<br>8               | 364.150<br>3               | 346.139<br>7               | <b>S</b> | 1427.78<br>93 | 1426.79<br>40 |               | 1459.81<br>55               | 1442.78<br>90              | 1441.80<br>49  | <b>13</b> |
| <b>4</b>  | 86.0964      | 449.239<br>5  | 431.228<br>9               | 477.234<br>4               | 459.223<br>8               | <b>I</b> | 1314.70<br>52 | 1327.72<br>56 | 1341.74<br>13 | 1372.78<br>35               | 1355.75<br>69              | 1354.77<br>29  | <b>12</b> |
| <b>5</b>  | 74.0600      | 550.287<br>1  | 532.276<br>6               | 578.282<br>1               | 560.271<br>5               | <b>T</b> | 1213.65<br>75 | 1226.67<br>80 | 1228.65<br>72 | 1259.69<br>94               | 1242.67<br>29              | 1241.68<br>88  | <b>11</b> |
| <b>6</b>  | 88.0393      | 665.314<br>1  | 647.303<br>5               | <b>693.309</b><br><b>0</b> | 675.298<br>4               | <b>D</b> | 1098.63<br>06 | 1097.63<br>54 |               | 1158.65<br>17               | 1141.62<br>52              | 1140.64<br>12  | <b>10</b> |
| <b>7</b>  | 72.0808      | 764.382<br>5  | 746.371<br>9               | <b>792.377</b><br><b>4</b> | 774.366<br>8               | <b>V</b> | 999.562<br>2  | 1012.58<br>26 |               | <b>1043.62</b><br><b>48</b> | 1026.59<br>82              | 1025.61<br>42  | <b>9</b>  |
| <b>8</b>  | 72.0808      | 863.450<br>9  | <b>845.440</b><br><b>3</b> | 891.445<br>8               | 873.435<br>3               | <b>V</b> | 900.493<br>8  | 913.514<br>2  |               | 944.556<br>4                | 927.529<br>8               | 926.545<br>8   | <b>8</b>  |
| <b>9</b>  | 70.0651      | 960.503<br>7  | 942.493<br>1               | 988.498<br>6               | 970.488<br>0               | <b>P</b> | 803.441<br>0  | 802.445<br>8  |               | <b>845.488</b><br><b>0</b>  | <b>828.461</b><br><b>4</b> | 827.477<br>4   | <b>7</b>  |
| <b>10</b> | 136.075<br>7 | 1123.56<br>70 | 1105.55<br>64              | 1151.56<br>19              | 1133.55<br>14              | <b>Y</b> | 640.377<br>7  |               |               | 748.435<br>2                | 731.408<br>7               | 730.424<br>6   | <b>6</b>  |
| <b>11</b> | 70.0651      | 1220.61<br>98 | 1202.60<br>92              | 1248.61<br>47              | 1230.60<br>41              | <b>P</b> | 543.324<br>9  | 542.329<br>7  |               | <b>585.371</b><br><b>9</b>  | <b>568.345</b><br><b>3</b> | 567.361<br>3   | <b>5</b>  |
| <b>12</b> | 86.0964      | 1333.70<br>38 | 1315.69<br>33              | 1361.69<br>87              | 1343.68<br>82              | <b>I</b> | 430.240<br>9  | 443.261<br>3  | 457.276<br>9  | 488.319<br>1                | 471.292<br>6               | 470.308<br>5   | <b>4</b>  |
| <b>13</b> | 60.0444      | 1420.73       | 1402.72                    | 1448.73                    | 1430.72                    | <b>S</b> | 343.208       | 342.213       |               | <b>375.235</b>              | <b>358.208</b>             | 357.224        | <b>3</b>  |

|    |              |               |               |               |               |   |              |              |  |              |              |   |   |
|----|--------------|---------------|---------------|---------------|---------------|---|--------------|--------------|--|--------------|--------------|---|---|
|    |              | 59            | 53            | 08            | 02            |   | 8            | 6            |  | 0            | 5            | 5 |   |
| 14 | 86.0964      | 1533.81<br>99 | 1515.80<br>94 | 1561.81<br>48 | 1543.80<br>43 | L | 230.124<br>8 | 229.129<br>5 |  | 288.203<br>0 | 271.176<br>5 |   | 2 |
| 15 | 129.113<br>5 |               |               |               |               | R | 74.0237      | 73.0284      |  | 175.119<br>0 | 158.092<br>4 |   |   |

1265

MS/MS Fragmentation of PMFIVNTNVPR

Found in gi|5542151, Chain A, Macrophage Migration Inhibitory Factor,  
(1303.7183,1+)

Ions Score: 48

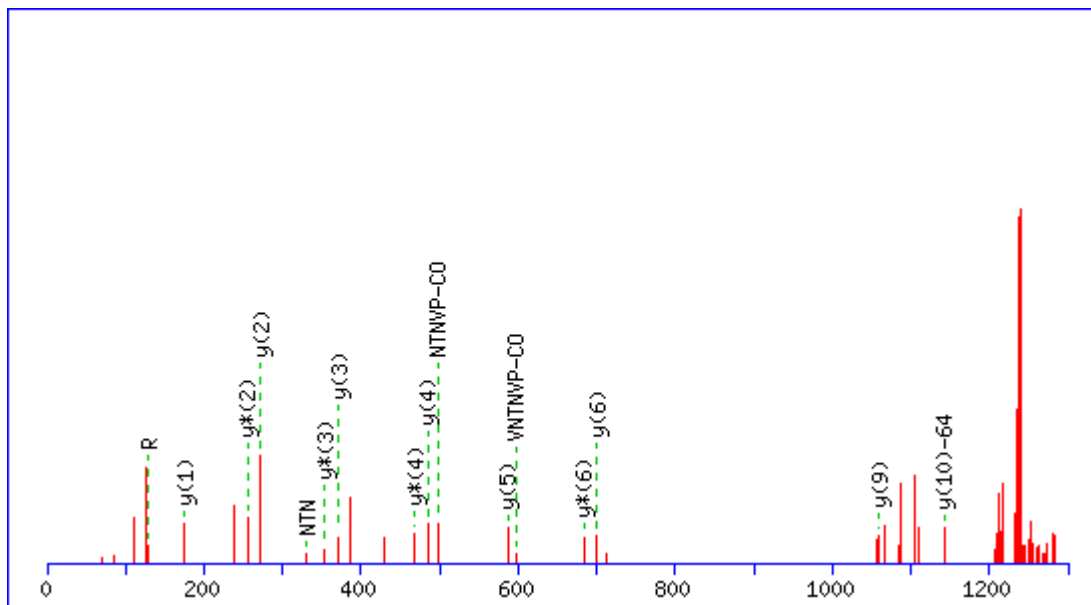

| #  | Immon        | a             | a*            | a <sup>0</sup> | b             | b*            | b <sup>0</sup> | Seq. | v             | w             | w'           | y             | y*            | y <sup>0</sup> | #  |
|----|--------------|---------------|---------------|----------------|---------------|---------------|----------------|------|---------------|---------------|--------------|---------------|---------------|----------------|----|
| 1  | 70.065<br>1  | 70.065<br>1   |               |                | 98.060<br>0   |               |                | P    |               |               |              |               |               |                | 11 |
| 2  | 56.049<br>5  | 153.10<br>22  |               |                | 181.09<br>72  |               |                | M    | 1114.6<br>004 | 1113.6<br>051 |              | 1142.6<br>317 | 1125.6<br>051 | 1124.6<br>211  | 10 |
| 3  | 120.08<br>08 | 300.17<br>07  |               |                | 328.16<br>56  |               |                | F    | 967.53<br>20  |               |              | 1059.5<br>946 | 1042.5<br>680 | 1041.5<br>840  | 9  |
| 4  | 86.096<br>4  | 413.25<br>47  |               |                | 441.24<br>96  |               |                | I    | 854.44<br>79  | 867.46<br>83  | 881.48<br>39 | 912.52<br>61  | 895.49<br>96  | 894.51<br>56   | 8  |
| 5  | 72.080<br>8  | 512.32<br>31  |               |                | 540.31<br>81  |               |                | V    | 755.37<br>95  | 768.39<br>99  |              | 799.44<br>21  | 782.41<br>55  | 781.43<br>15   | 7  |
| 6  | 87.055<br>3  | 626.36<br>61  | 609.33<br>95  |                | 654.36<br>10  | 637.33<br>44  |                | N    | 641.33<br>65  | 640.34<br>13  |              | 700.37<br>37  | 683.34<br>71  | 682.36<br>31   | 6  |
| 7  | 74.060<br>0  | 727.41<br>37  | 710.38<br>72  | 709.40<br>32   | 755.40<br>87  | 738.38<br>21  | 737.39<br>81   | T    | 540.28<br>89  | 553.30<br>93  | 555.28<br>85 | 586.33<br>07  | 569.30<br>42  | 568.32<br>02   | 5  |
| 8  | 87.055<br>3  | 841.45<br>67  | 824.43<br>01  | 823.44<br>61   | 869.45<br>16  | 852.42<br>50  | 851.44<br>10   | N    | 426.24<br>59  | 425.25<br>07  |              | 485.28<br>31  | 468.25<br>65  |                | 4  |
| 9  | 72.080<br>8  | 940.52<br>51  | 923.49<br>85  | 922.51<br>45   | 968.52<br>00  | 951.49<br>34  | 950.50<br>94   | V    | 327.17<br>75  | 340.19<br>79  |              | 371.24<br>01  | 354.21<br>36  |                | 3  |
| 10 | 70.065<br>1  | 1037.5<br>778 | 1020.5<br>513 | 1019.5<br>673  | 1065.5<br>728 | 1048.5<br>462 | 1047.5<br>622  | P    | 230.12<br>48  | 229.12<br>95  |              | 272.17<br>17  | 255.14<br>52  |                | 2  |
| 11 | 129.11<br>35 |               |               |                |               |               |                | R    | 74.023<br>7   | 73.028<br>4   |              | 175.11<br>90  | 158.09<br>24  |                |    |

1266

MS/MS Fragmentation of QVTITGSAASISLAQYLINAR

Found in gi|460771, hnRNP-E1,

(2177.2593,1+)

Ions Score: 65

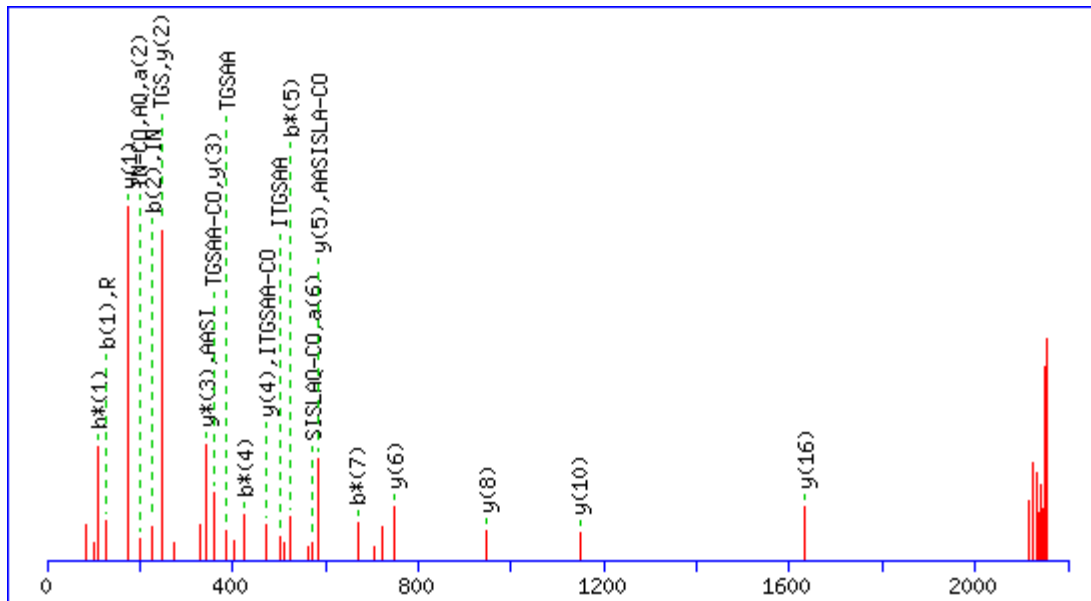

| # | Immon        | a            | a*           | a <sup>0</sup> | b            | b*           | b <sup>0</sup> | Seq. | v             | w             | w'     | y             | y*            | y <sup>0</sup> | #  |
|---|--------------|--------------|--------------|----------------|--------------|--------------|----------------|------|---------------|---------------|--------|---------------|---------------|----------------|----|
| 1 | 101.07<br>09 | 101.07<br>09 | 84.044<br>4  |                | 129.06<br>59 | 112.03<br>93 |                | Q    |               |               |        |               |               |                | 21 |
| 2 | 72.080<br>8  | 200.13<br>94 | 183.11<br>28 |                | 228.13<br>43 | 211.10<br>77 |                | V    | 2005.0<br>713 | 2018.0<br>917 |        | 2049.1<br>339 | 2032.1<br>073 | 2031.1<br>233  | 20 |
| 3 | 74.060       | 301.18       | 284.16       | 283.17         | 329.18       | 312.15       | 311.17         | T    | 1904.0        | 1917.0        | 1919.0 | 1950.0        | 1933.0        | 1932.0         | 19 |

|           |              |                            |               |               |               |                            |               |          |               |               |               |                             |               |               |           |
|-----------|--------------|----------------------------|---------------|---------------|---------------|----------------------------|---------------|----------|---------------|---------------|---------------|-----------------------------|---------------|---------------|-----------|
|           | 0            | 70                         | 05            | 65            | 19            | 54                         | 14            |          | 236           | 440           | 233           | 655                         | 389           | 549           |           |
| <b>4</b>  | 86.096<br>4  | 414.27<br>11               | 397.24<br>45  | 396.26<br>05  | 442.26<br>60  | <b>425.23</b><br><b>95</b> | 424.25<br>54  | <b>I</b> | 1790.9<br>395 | 1803.9<br>599 | 1817.9<br>756 | 1849.0<br>178               | 1831.9<br>912 | 1831.0<br>072 | <b>18</b> |
| <b>5</b>  | 74.060<br>0  | 515.31<br>88               | 498.29<br>22  | 497.30<br>82  | 543.31<br>37  | <b>526.28</b><br><b>71</b> | 525.30<br>31  | <b>T</b> | 1689.8<br>919 | 1702.9<br>123 | 1704.8<br>915 | 1735.9<br>337               | 1718.9<br>072 | 1717.9<br>232 | <b>17</b> |
| <b>6</b>  | 30.033<br>8  | <b>572.34</b><br><b>02</b> | 555.31<br>37  | 554.32<br>97  | 600.33<br>52  | 583.30<br>86               | 582.32<br>46  | <b>G</b> |               |               |               | <b>1634.8</b><br><b>860</b> | 1617.8<br>595 | 1616.8<br>755 | <b>16</b> |
| <b>7</b>  | 60.044<br>4  | 659.37<br>23               | 642.34<br>57  | 641.36<br>17  | 687.36<br>72  | <b>670.34</b><br><b>06</b> | 669.35<br>66  | <b>S</b> | 1545.8<br>384 | 1544.8<br>431 |               | 1577.8<br>646               | 1560.8<br>380 | 1559.8<br>540 | <b>15</b> |
| <b>8</b>  | 44.049<br>5  | 730.40<br>94               | 713.38<br>28  | 712.39<br>88  | 758.40<br>43  | 741.37<br>77               | 740.39<br>37  | <b>A</b> | 1474.8<br>013 |               |               | 1490.8<br>326               | 1473.8<br>060 | 1472.8<br>220 | <b>14</b> |
| <b>9</b>  | 44.049<br>5  | 801.44<br>65               | 784.41<br>99  | 783.43<br>59  | 829.44<br>14  | 812.41<br>49               | 811.43<br>08  | <b>A</b> | 1403.7<br>641 |               |               | 1419.7<br>954               | 1402.7<br>689 | 1401.7<br>849 | <b>13</b> |
| <b>10</b> | 60.044<br>4  | 888.47<br>85               | 871.45<br>20  | 870.46<br>80  | 916.47<br>34  | 899.44<br>69               | 898.46<br>29  | <b>S</b> | 1316.7<br>321 | 1315.7<br>369 |               | 1348.7<br>583               | 1331.7<br>318 | 1330.7<br>478 | <b>12</b> |
| <b>11</b> | 86.096<br>4  | 1001.5<br>626              | 984.53<br>60  | 983.55<br>20  | 1029.5<br>575 | 1012.5<br>310              | 1011.5<br>469 | <b>I</b> | 1203.6<br>480 | 1216.6<br>684 | 1230.6<br>841 | 1261.7<br>263               | 1244.6<br>997 | 1243.7<br>157 | <b>11</b> |
| <b>12</b> | 60.044<br>4  | 1088.5<br>946              | 1071.5<br>681 | 1070.5<br>840 | 1116.5<br>895 | 1099.5<br>630              | 1098.5<br>790 | <b>S</b> | 1116.6<br>160 | 1115.6<br>208 |               | <b>1148.6</b><br><b>422</b> | 1131.6<br>157 | 1130.6<br>317 | <b>10</b> |
| <b>13</b> | 86.096<br>4  | 1201.6<br>787              | 1184.6<br>521 | 1183.6<br>681 | 1229.6<br>736 | 1212.6<br>470              | 1211.6<br>630 | <b>L</b> | 1003.5<br>320 | 1002.5<br>367 |               | 1061.6<br>102               | 1044.5<br>837 |               | <b>9</b>  |
| <b>14</b> | 44.049<br>5  | 1272.7<br>158              | 1255.6<br>892 | 1254.7<br>052 | 1300.7<br>107 | 1283.6<br>842              | 1282.7<br>001 | <b>A</b> | 932.49<br>48  |               |               | <b>948.52</b><br><b>61</b>  | 931.49<br>96  |               | <b>8</b>  |
| <b>15</b> | 101.07<br>09 | 1400.7<br>744              | 1383.7<br>478 | 1382.7<br>638 | 1428.7<br>693 | 1411.7<br>427              | 1410.7<br>587 | <b>Q</b> | 804.43<br>63  | 803.44<br>10  |               | 877.48<br>90                | 860.46<br>25  |               | <b>7</b>  |
| <b>16</b> | 136.07<br>57 | 1563.8<br>377              | 1546.8<br>112 | 1545.8<br>271 | 1591.8<br>326 | 1574.8<br>061              | 1573.8<br>221 | <b>Y</b> | 641.37<br>29  |               |               | <b>749.43</b><br><b>05</b>  | 732.40<br>39  |               | <b>6</b>  |

|           |                            |               |               |               |               |               |               |          |              |              |              |                            |                            |  |          |
|-----------|----------------------------|---------------|---------------|---------------|---------------|---------------|---------------|----------|--------------|--------------|--------------|----------------------------|----------------------------|--|----------|
| <b>17</b> | 86.096<br>4                | 1676.9<br>218 | 1659.8<br>952 | 1658.9<br>112 | 1704.9<br>167 | 1687.8<br>901 | 1686.9<br>061 | <b>L</b> | 528.28<br>89 | 527.29<br>36 |              | <b>586.36</b><br><b>71</b> | 569.34<br>06               |  | <b>5</b> |
| <b>18</b> | 86.096<br>4                | 1790.0<br>058 | 1772.9<br>793 | 1771.9<br>953 | 1818.0<br>007 | 1800.9<br>742 | 1799.9<br>902 | <b>I</b> | 415.20<br>48 | 428.22<br>52 | 442.24<br>09 | <b>473.28</b><br><b>31</b> | 456.25<br>65               |  | <b>4</b> |
| <b>19</b> | 87.055<br>3                | 1904.0<br>488 | 1887.0<br>222 | 1886.0<br>382 | 1932.0<br>437 | 1915.0<br>171 | 1914.0<br>331 | <b>N</b> | 301.16<br>19 | 300.16<br>66 |              | <b>360.19</b><br><b>90</b> | <b>343.17</b><br><b>24</b> |  | <b>3</b> |
| <b>20</b> | 44.049<br>5                | 1975.0<br>859 | 1958.0<br>593 | 1957.0<br>753 | 2003.0<br>808 | 1986.0<br>542 | 1985.0<br>702 | <b>A</b> | 230.12<br>48 |              |              | <b>246.15</b><br><b>61</b> | 229.12<br>95               |  | <b>2</b> |
| <b>21</b> | <b>129.11</b><br><b>35</b> |               |               |               |               |               |               | <b>R</b> | 74.023<br>7  | 73.028<br>4  |              | <b>175.11</b><br><b>90</b> | 158.09<br>24               |  | <b>1</b> |

1267

MS/MS Fragmentation of LTVEDPVTVEYITR

Found in gi|12314029, proteasome subunit,

(1634.9735,1+)

Ions Score: 44

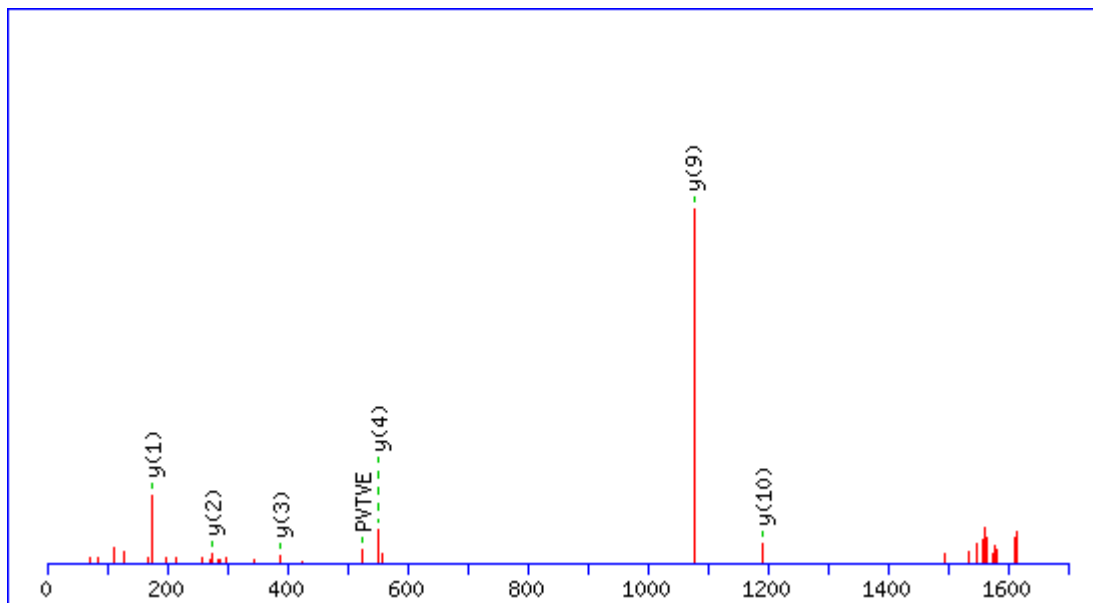

| # | Immon.       | a            | a <sup>0</sup> | b            | b <sup>0</sup> | Seq. | v             | w             | w'            | y             | y*            | y <sup>0</sup> | #  |
|---|--------------|--------------|----------------|--------------|----------------|------|---------------|---------------|---------------|---------------|---------------|----------------|----|
| 1 | 86.0964      | 86.0964      |                | 114.091<br>3 |                | L    |               |               |               |               |               |                | 14 |
| 2 | 74.0600      | 187.144<br>1 | 169.133<br>5   | 215.139<br>0 | 197.128<br>5   | T    | 1475.73<br>77 | 1488.75<br>81 | 1490.73<br>73 | 1521.77<br>95 | 1504.75<br>30 | 1503.76<br>90  | 13 |
| 3 | 72.0808      | 286.212<br>5 | 268.202<br>0   | 314.207<br>4 | 296.196<br>9   | V    | 1376.66<br>92 | 1389.68<br>96 |               | 1420.73<br>18 | 1403.70<br>53 | 1402.72<br>13  | 12 |
| 4 | 102.055<br>0 | 415.255<br>1 | 397.244<br>5   | 443.250<br>0 | 425.239<br>5   | E    | 1247.62<br>66 | 1246.63<br>14 |               | 1321.66<br>34 | 1304.63<br>69 | 1303.65<br>29  | 11 |
| 5 | 88.0393      | 530.282<br>1 | 512.271<br>5   | 558.277<br>0 | 540.266<br>4   | D    | 1132.59<br>97 | 1131.60<br>45 |               | 1192.62<br>08 | 1175.59<br>43 | 1174.61<br>03  | 10 |
| 6 | 70.0651      | 627.334<br>8 | 609.324<br>3   | 655.329<br>7 | 637.319<br>2   | P    | 1035.54<br>69 | 1034.55<br>17 |               | 1077.59<br>39 | 1060.56<br>73 | 1059.58<br>33  | 9  |
| 7 | 72.0808      | 726.403      | 708.392        | 754.398      | 736.387        | V    | 936.478       | 949.498       |               | 980.541       | 963.514       | 962.530        | 8  |

|           |              |               |               |               |               |          |              |              |              |                            |              |              |          |
|-----------|--------------|---------------|---------------|---------------|---------------|----------|--------------|--------------|--------------|----------------------------|--------------|--------------|----------|
|           |              | 2             | 7             | 1             | 6             |          | 5            | 9            |              | 1                          | 6            | 6            |          |
| <b>8</b>  | 74.0600      | 827.450<br>9  | 809.440<br>3  | 855.445<br>8  | 837.435<br>3  | <b>T</b> | 835.430<br>8 | 848.451<br>2 | 850.430<br>5 | 881.472<br>7               | 864.446<br>2 | 863.462<br>1 | <b>7</b> |
| <b>9</b>  | 72.0808      | 926.519<br>3  | 908.508<br>8  | 954.514<br>2  | 936.503<br>7  | <b>V</b> | 736.362<br>4 | 749.382<br>8 |              | 780.425<br>0               | 763.398<br>5 | 762.414<br>5 | <b>6</b> |
| <b>10</b> | 102.055<br>0 | 1055.56<br>19 | 1037.55<br>14 | 1083.55<br>68 | 1065.54<br>63 | <b>E</b> | 607.319<br>8 | 606.324<br>6 |              | 681.356<br>6               | 664.330<br>1 | 663.346<br>1 | <b>5</b> |
| <b>11</b> | 136.075<br>7 | 1218.62<br>52 | 1200.61<br>47 | 1246.62<br>02 | 1228.60<br>96 | <b>Y</b> | 444.256<br>5 |              |              | <b>552.314</b><br><b>0</b> | 535.287<br>5 | 534.303<br>5 | <b>4</b> |
| <b>12</b> | 86.0964      | 1331.70<br>93 | 1313.69<br>87 | 1359.70<br>42 | 1341.69<br>37 | <b>I</b> | 331.172<br>4 | 344.192<br>8 | 358.208<br>5 | <b>389.250</b><br><b>7</b> | 372.224<br>1 | 371.240<br>1 | <b>3</b> |
| <b>13</b> | 74.0600      | 1432.75<br>70 | 1414.74<br>64 | 1460.75<br>19 | 1442.74<br>13 | <b>T</b> | 230.124<br>8 | 243.145<br>2 | 245.124<br>4 | <b>276.166</b><br><b>6</b> | 259.140<br>1 | 258.156<br>1 | <b>2</b> |
| <b>14</b> | 129.113<br>5 |               |               |               |               | <b>R</b> | 74.0237      | 73.0284      |              | <b>175.119</b><br><b>0</b> | 158.092<br>4 |              |          |

1268

MS/MS Fragmentation of LFDSDPITVTVPEVSR

Found in gi|338305, SP40,40,

(1873.964,1+)

Ions Score: 41



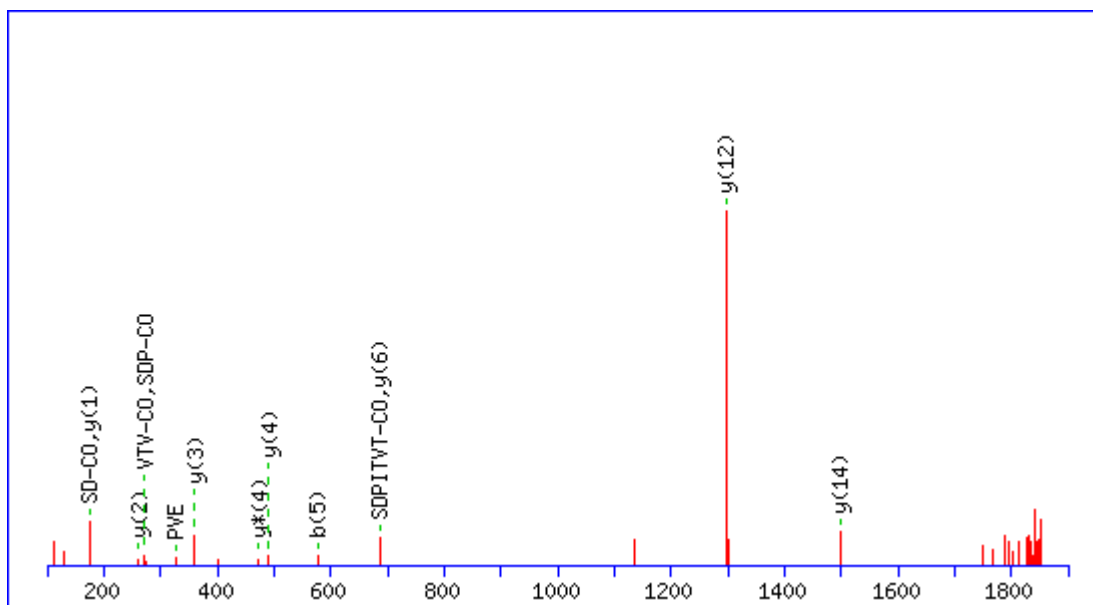

| # | Immon.       | a            | a <sup>0</sup> | b            | b <sup>0</sup> | Seq. | v             | w             | w'      | y             | y*            | y <sup>0</sup> | #  |
|---|--------------|--------------|----------------|--------------|----------------|------|---------------|---------------|---------|---------------|---------------|----------------|----|
| 1 | 86.0964      | 86.0964      |                | 114.091<br>3 |                | L    |               |               |         |               |               |                | 17 |
| 2 | 120.080<br>8 | 233.164<br>8 |                | 261.159<br>8 |                | F    | 1668.84<br>39 |               |         | 1760.90<br>65 | 1743.88<br>00 | 1742.89<br>59  | 16 |
| 3 | 88.0393      | 348.191<br>8 | 330.181<br>2   | 376.186<br>7 | 358.176<br>1   | D    | 1553.81<br>70 | 1552.82<br>17 |         | 1613.83<br>81 | 1596.81<br>15 | 1595.82<br>75  | 15 |
| 4 | 60.0444      | 435.223<br>8 | 417.213<br>2   | 463.218<br>7 | 445.208<br>2   | S    | 1466.78<br>49 | 1465.78<br>97 |         | 1498.81<br>12 | 1481.78<br>46 | 1480.80<br>06  | 14 |
| 5 | 88.0393      | 550.250<br>8 | 532.240<br>2   | 578.245<br>7 | 560.235<br>1   | D    | 1351.75<br>80 | 1350.76<br>27 |         | 1411.77<br>91 | 1394.75<br>26 | 1393.76<br>86  | 13 |
| 6 | 70.0651      | 647.303<br>5 | 629.293<br>0   | 675.298<br>4 | 657.287<br>9   | P    | 1254.70<br>52 | 1253.71<br>00 |         | 1296.75<br>22 | 1279.72<br>56 | 1278.74<br>16  | 12 |
| 7 | 86.0964      | 760.387      | 742.377        | 788.382      | 770.371        | I    | 1141.62       | 1154.64       | 1168.65 | 1199.69       | 1182.67       | 1181.68        | 11 |

|           |              |               |               |               |               |          |               |               |               |                            |                            |               |           |
|-----------|--------------|---------------|---------------|---------------|---------------|----------|---------------|---------------|---------------|----------------------------|----------------------------|---------------|-----------|
|           |              | 6             | 0             | 5             | 9             |          | 12            | 16            | 72            | 94                         | 29                         | 89            |           |
| <b>8</b>  | 74.0600      | 861.435<br>3  | 843.424<br>7  | 889.430<br>2  | 871.419<br>6  | <b>T</b> | 1040.57<br>35 | 1053.59<br>39 | 1055.57<br>32 | 1086.61<br>54              | 1069.58<br>88              | 1068.60<br>48 | <b>10</b> |
| <b>9</b>  | 72.0808      | 960.503<br>7  | 942.493<br>1  | 988.498<br>6  | 970.488<br>0  | <b>V</b> | 941.505<br>1  | 954.525<br>5  |               | 985.567<br>7               | 968.541<br>1               | 967.557<br>1  | <b>9</b>  |
| <b>10</b> | 74.0600      | 1061.55<br>14 | 1043.54<br>08 | 1089.54<br>63 | 1071.53<br>57 | <b>T</b> | 840.457<br>4  | 853.477<br>8  | 855.457<br>1  | 886.499<br>3               | 869.472<br>7               | 868.488<br>7  | <b>8</b>  |
| <b>11</b> | 72.0808      | 1160.61<br>98 | 1142.60<br>92 | 1188.61<br>47 | 1170.60<br>41 | <b>V</b> | 741.389<br>0  | 754.409<br>4  |               | 785.451<br>6               | 768.425<br>0               | 767.441<br>0  | <b>7</b>  |
| <b>12</b> | 70.0651      | 1257.67<br>25 | 1239.66<br>20 | 1285.66<br>74 | 1267.65<br>69 | <b>P</b> | 644.336<br>2  | 643.341<br>0  |               | <b>686.383</b><br><b>2</b> | 669.356<br>6               | 668.372<br>6  | <b>6</b>  |
| <b>13</b> | 72.0808      | 1356.74<br>09 | 1338.73<br>04 | 1384.73<br>59 | 1366.72<br>53 | <b>V</b> | 545.267<br>8  | 558.288<br>2  |               | 589.330<br>4               | 572.303<br>9               | 571.319<br>8  | <b>5</b>  |
| <b>14</b> | 102.055<br>0 | 1485.78<br>35 | 1467.77<br>30 | 1513.77<br>85 | 1495.76<br>79 | <b>E</b> | 416.225<br>2  | 415.230<br>0  |               | <b>490.262</b><br><b>0</b> | <b>473.235</b><br><b>4</b> | 472.251<br>4  | <b>4</b>  |
| <b>15</b> | 72.0808      | 1584.85<br>20 | 1566.84<br>14 | 1612.84<br>69 | 1594.83<br>63 | <b>V</b> | 317.156<br>8  | 330.177<br>2  |               | <b>361.219</b><br><b>4</b> | 344.192<br>8               | 343.208<br>8  | <b>3</b>  |
| <b>16</b> | 60.0444      | 1671.88<br>40 | 1653.87<br>34 | 1699.87<br>89 | 1681.86<br>83 | <b>S</b> | 230.124<br>8  | 229.129<br>5  |               | <b>262.151</b><br><b>0</b> | 245.124<br>4               | 244.140<br>4  | <b>2</b>  |
| <b>17</b> | 129.113<br>5 |               |               |               |               | <b>R</b> | 74.0237       | 73.0284       |               |                            | <b>175.119</b><br><b>0</b> | 158.092<br>4  |           |

1269

MS/MS Fragmentation of YYVTIIDAPGHR

Found in gi|31092, unnamed protein product,

(1404.6914,1+)

Ions Score: 49

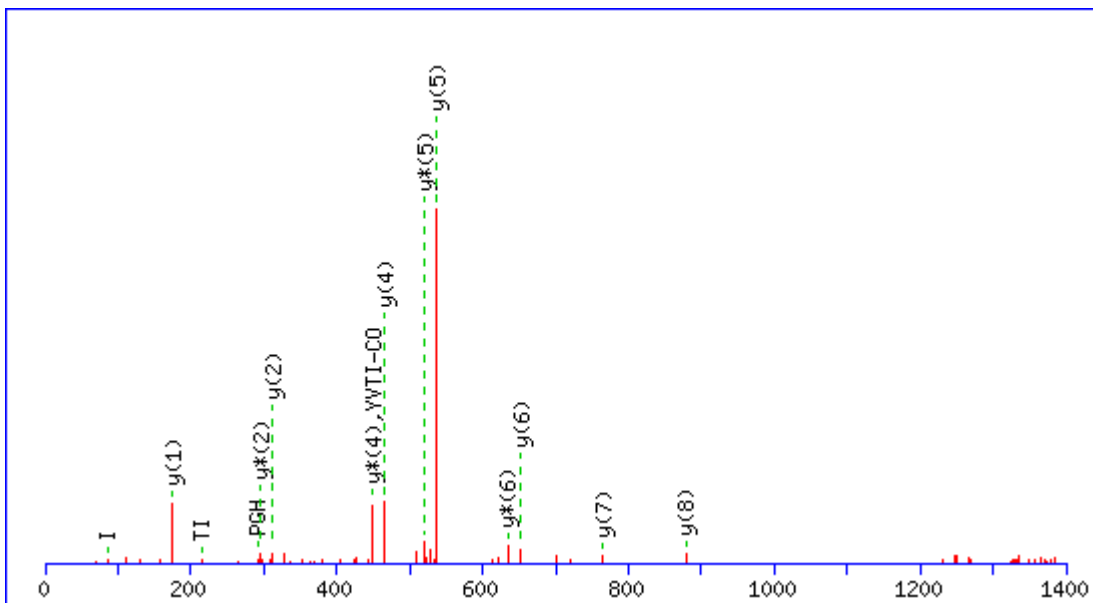

| # | Immon.       | a            | a <sup>0</sup> | b            | b <sup>0</sup> | Seq. | v             | w             | w'           | y             | y*            | y <sup>0</sup> | #  |
|---|--------------|--------------|----------------|--------------|----------------|------|---------------|---------------|--------------|---------------|---------------|----------------|----|
| 1 | 136.075<br>7 | 136.075<br>7 |                | 164.070<br>6 |                | Y    |               |               |              |               |               |                | 12 |
| 2 | 136.075<br>7 | 299.139<br>0 |                | 327.133<br>9 |                | Y    | 1133.60<br>62 |               |              | 1241.66<br>37 | 1224.63<br>71 | 1223.65<br>31  | 11 |
| 3 | 72.0808      | 398.207<br>4 |                | 426.202<br>3 |                | V    | 1034.53<br>78 | 1047.55<br>82 |              | 1078.60<br>04 | 1061.57<br>38 | 1060.58<br>98  | 10 |
| 4 | 74.0600      | 499.255<br>1 | 481.244<br>5   | 527.250<br>0 | 509.239<br>5   | T    | 933.490<br>1  | 946.510<br>5  | 948.489<br>8 | 979.532<br>0  | 962.505<br>4  | 961.521<br>4   | 9  |
| 5 | 86.0964      | 612.339<br>2 | 594.328<br>6   | 640.334<br>1 | 622.323<br>5   | I    | 820.406<br>0  | 833.426<br>4  | 847.442<br>1 | 878.484<br>3  | 861.457<br>7  | 860.473<br>7   | 8  |
| 6 | 86.0964      | 725.423<br>2 | 707.412<br>7   | 753.418<br>2 | 735.407<br>6   | I    | 707.322<br>0  | 720.342<br>4  | 734.358<br>0 | 765.400<br>2  | 748.373<br>7  | 747.389<br>6   | 7  |

|           |              |               |               |               |               |          |              |              |  |                      |                      |              |          |
|-----------|--------------|---------------|---------------|---------------|---------------|----------|--------------|--------------|--|----------------------|----------------------|--------------|----------|
| <b>7</b>  | 88.0393      | 840.450<br>2  | 822.439<br>6  | 868.445<br>1  | 850.434<br>5  | <b>D</b> | 592.295<br>0 | 591.299<br>8 |  | <b>652.316<br/>1</b> | <b>635.289<br/>6</b> | 634.305<br>6 | <b>6</b> |
| <b>8</b>  | 44.0495      | 911.487<br>3  | 893.476<br>7  | 939.482<br>2  | 921.471<br>6  | <b>A</b> | 521.257<br>9 |              |  | <b>537.289<br/>2</b> | <b>520.262<br/>7</b> |              | <b>5</b> |
| <b>9</b>  | 70.0651      | 1008.54<br>01 | 990.529<br>5  | 1036.53<br>50 | 1018.52<br>44 | <b>P</b> | 424.205<br>1 | 423.209<br>9 |  | <b>466.252<br/>1</b> | <b>449.225<br/>5</b> |              | <b>4</b> |
| <b>10</b> | 30.0338      | 1065.56<br>15 | 1047.55<br>10 | 1093.55<br>64 | 1075.54<br>59 | <b>G</b> |              |              |  | 369.199<br>3         | 352.172<br>8         |              | <b>3</b> |
| <b>11</b> | 110.071<br>3 | 1202.62<br>04 | 1184.60<br>99 | 1230.61<br>54 | 1212.60<br>48 | <b>H</b> | 230.124<br>8 |              |  | <b>312.177<br/>9</b> | <b>295.151<br/>3</b> |              | <b>2</b> |
| <b>12</b> | 129.113<br>5 |               |               |               |               | <b>R</b> | 74.0237      | 73.0284      |  | <b>175.119<br/>0</b> | 158.092<br>4         |              |          |

1270

MS/MS Fragmentation of EVDIGIPDATGR

Found in gi|48257098, VCP protein,

(1242.6382,1+)

Ions Score: 37

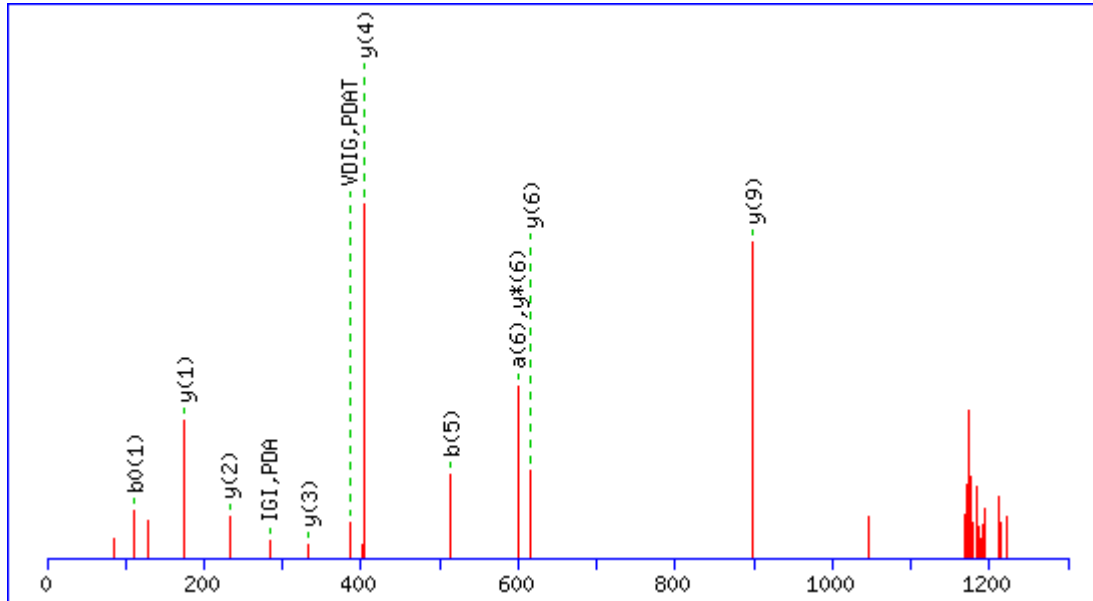

| # | Immon.       | a                   | a <sup>0</sup> | b                   | b <sup>0</sup>      | Seq.     | v             | w             | w'           | y                   | y*             | y <sup>0</sup> | #         |
|---|--------------|---------------------|----------------|---------------------|---------------------|----------|---------------|---------------|--------------|---------------------|----------------|----------------|-----------|
| 1 | 102.055<br>0 | 102.055<br>0        | 84.0444        | 130.049<br>9        | <b>112.039</b><br>3 | <b>E</b> |               |               |              |                     |                |                | <b>12</b> |
| 2 | 72.0808      | 201.123<br>4        | 183.112<br>8   | 229.118<br>3        | 211.107<br>7        | <b>V</b> | 1069.52<br>73 | 1082.54<br>77 |              | 1113.58<br>99       | 1096.56<br>33  | 1095.57<br>93  | <b>11</b> |
| 3 | 88.0393      | 316.150<br>3        | 298.139<br>7   | 344.145<br>2        | 326.134<br>7        | <b>D</b> | 954.500<br>3  | 953.505<br>1  |              | 1014.52<br>15       | 997.494<br>9   | 996.510<br>9   | <b>10</b> |
| 4 | 86.0964      | 429.234<br>4        | 411.223<br>8   | 457.229<br>3        | 439.218<br>7        | <b>I</b> | 841.416<br>3  | 854.436<br>7  | 868.452<br>3 | <b>899.494</b><br>5 | 882.468<br>0   | 881.483<br>9   | <b>9</b>  |
| 5 | 30.0338      | 486.255<br>8        | 468.245<br>3   | <b>514.250</b><br>8 | 496.240<br>2        | <b>G</b> |               |               |              | 786.410<br>4        | 769.383<br>9   | 768.399<br>9   | <b>8</b>  |
| 6 | 86.0964      | <b>599.339</b><br>9 | 581.329<br>3   | 627.334<br>8        | 609.324<br>3        | <b>I</b> | 671.310<br>7  | 684.331<br>1  | 698.346<br>8 | 729.389<br>0        | 712.362<br>4   | 711.378<br>4   | <b>7</b>  |
| 7 | 70.0651      | 696.392             | 678.382        | 724.387             | 706.377             | <b>P</b> | 574.258       | 573.262       |              | <b>616.304</b>      | <b>599.278</b> | 598.294        | <b>6</b>  |

|           |              |               |               |               |               |          |              |              |              |                            |              |              |          |
|-----------|--------------|---------------|---------------|---------------|---------------|----------|--------------|--------------|--------------|----------------------------|--------------|--------------|----------|
|           |              | 7             | 1             | 6             | 0             |          | 0            | 7            |              | <b>9</b>                   | <b>4</b>     | 4            |          |
| <b>8</b>  | 88.0393      | 811.419<br>6  | 793.409<br>0  | 839.414<br>5  | 821.404<br>0  | <b>D</b> | 459.231<br>0 | 458.235<br>8 |              | 519.252<br>2               | 502.225<br>6 | 501.241<br>6 | <b>5</b> |
| <b>9</b>  | 44.0495      | 882.456<br>7  | 864.446<br>2  | 910.451<br>6  | 892.441<br>1  | <b>A</b> | 388.193<br>9 |              |              | <b>404.225</b><br><b>2</b> | 387.198<br>7 | 386.214<br>6 | <b>4</b> |
| <b>10</b> | 74.0600      | 983.504<br>4  | 965.493<br>8  | 1011.49<br>93 | 993.488<br>8  | <b>T</b> | 287.146<br>2 | 300.166<br>6 | 302.145<br>9 | <b>333.188</b><br><b>1</b> | 316.161<br>5 | 315.177<br>5 | <b>3</b> |
| <b>11</b> | 30.0338      | 1040.52<br>59 | 1022.51<br>53 | 1068.52<br>08 | 1050.51<br>02 | <b>G</b> |              |              |              | <b>232.140</b><br><b>4</b> | 215.113<br>9 |              | <b>2</b> |
| <b>12</b> | 129.113<br>5 |               |               |               |               | <b>R</b> | 74.0237      | 73.0284      |              | <b>175.119</b><br><b>0</b> | 158.092<br>4 |              |          |

1271

MS/MS Fragmentation of DSSLQDGEFSMDLR

Found in gi|5822002, Chain A, Profilin Binds Proline-Rich Ligands In Two Distinct Amide Backbone Orientations,

(1625.7438,1+)

Ions Score: 55

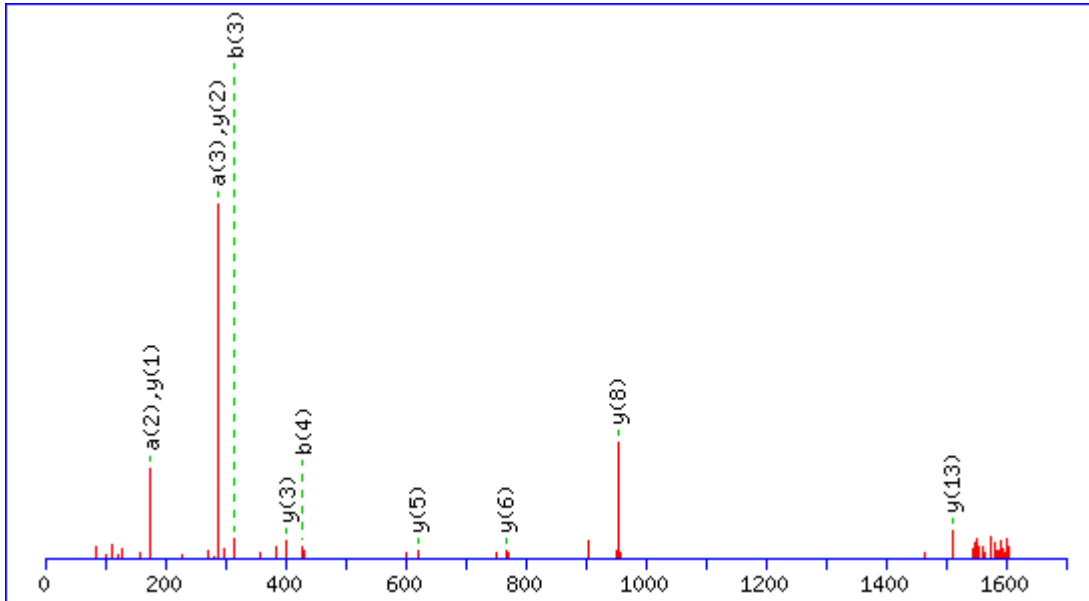

| # | Immon        | a            | a*           | a <sup>0</sup> | b            | b*           | b <sup>0</sup> | Seq. | v             | w             | y             | y*            | y <sup>0</sup> | #  |
|---|--------------|--------------|--------------|----------------|--------------|--------------|----------------|------|---------------|---------------|---------------|---------------|----------------|----|
| 1 | 88.0393      | 88.0393      |              | 70.0287        | 116.034<br>2 |              | 98.0237        | D    |               |               |               |               |                | 14 |
| 2 | 60.0444      | 175.071<br>3 |              | 157.060<br>8   | 203.066<br>2 |              | 185.055<br>7   | S    | 1478.69<br>44 | 1477.69<br>92 | 1510.72<br>06 | 1493.69<br>41 | 1492.71<br>01  | 13 |
| 3 | 86.0964      | 288.155<br>4 |              | 270.144<br>8   | 316.150<br>3 |              | 298.139<br>7   | L    | 1365.61<br>03 | 1364.61<br>51 | 1423.68<br>86 | 1406.66<br>20 | 1405.67<br>80  | 12 |
| 4 | 86.0964      | 401.239<br>5 |              | 383.228<br>9   | 429.234<br>4 |              | 411.223<br>8   | L    | 1252.52<br>63 | 1251.53<br>10 | 1310.60<br>45 | 1293.57<br>80 | 1292.59<br>40  | 11 |
| 5 | 101.070<br>9 | 529.298<br>0 | 512.271<br>5 | 511.287<br>5   | 557.293<br>0 | 540.266<br>4 | 539.282<br>4   | Q    | 1124.46<br>77 | 1123.47<br>25 | 1197.52<br>05 | 1180.49<br>39 | 1179.50<br>99  | 10 |
| 6 | 88.0393      | 644.325<br>0 | 627.298<br>4 | 626.314<br>4   | 672.319<br>9 | 655.293<br>3 | 654.309<br>3   | D    | 1009.44<br>08 | 1008.44<br>55 | 1069.46<br>19 | 1052.43<br>53 | 1051.45<br>13  | 9  |
| 7 | 30.0338      | 701.346      | 684.319      | 683.335        | 729.341      | 712.314      | 711.330        | G    |               |               | 954.434       | 937.408       | 936.424        | 8  |

|           |              |               |               |               |               |               |               |          |              |              |                            |              |              |          |
|-----------|--------------|---------------|---------------|---------------|---------------|---------------|---------------|----------|--------------|--------------|----------------------------|--------------|--------------|----------|
|           |              | 4             | 9             | 9             | 4             | 8             | 8             |          |              |              | 9                          | 4            | 4            |          |
| <b>8</b>  | 102.055<br>0 | 830.389<br>0  | 813.362<br>5  | 812.378<br>5  | 858.384<br>0  | 841.357<br>4  | 840.373<br>4  | <b>E</b> | 823.376<br>7 | 822.381<br>5 | 897.413<br>5               | 880.386<br>9 | 879.402<br>9 | <b>7</b> |
| <b>9</b>  | 120.080<br>8 | 977.457<br>5  | 960.430<br>9  | 959.446<br>9  | 1005.45<br>24 | 988.425<br>8  | 987.441<br>8  | <b>F</b> | 676.308<br>3 |              | <b>768.370</b><br><b>9</b> | 751.344<br>3 | 750.360<br>3 | <b>6</b> |
| <b>10</b> | 60.0444      | 1064.48<br>95 | 1047.46<br>29 | 1046.47<br>89 | 1092.48<br>44 | 1075.45<br>78 | 1074.47<br>38 | <b>S</b> | 589.276<br>3 | 588.281<br>0 | <b>621.302</b><br><b>5</b> | 604.275<br>9 | 603.291<br>9 | <b>5</b> |
| <b>11</b> | 104.052<br>8 | 1195.53<br>00 | 1178.50<br>34 | 1177.51<br>94 | 1223.52<br>49 | 1206.49<br>83 | 1205.51<br>43 | <b>M</b> | 458.235<br>8 | 457.240<br>5 | 534.270<br>4               | 517.243<br>9 | 516.259<br>9 | <b>4</b> |
| <b>12</b> | 88.0393      | 1310.55<br>69 | 1293.53<br>04 | 1292.54<br>63 | 1338.55<br>18 | 1321.52<br>53 | 1320.54<br>13 | <b>D</b> | 343.208<br>8 | 342.213<br>6 | <b>403.230</b><br><b>0</b> | 386.203<br>4 | 385.219<br>4 | <b>3</b> |
| <b>13</b> | 86.0964      | 1423.64<br>10 | 1406.61<br>44 | 1405.63<br>04 | 1451.63<br>59 | 1434.60<br>93 | 1433.62<br>53 | <b>L</b> | 230.124<br>8 | 229.129<br>5 | <b>288.203</b><br><b>0</b> | 271.176<br>5 |              | <b>2</b> |
| <b>14</b> | 129.113<br>5 |               |               |               |               |               |               | <b>R</b> | 74.0237      | 73.0284      | <b>175.119</b><br><b>0</b> | 158.092<br>4 |              |          |

1272

MS/MS Fragmentation of SSQIGAVVSHQSSVIPDR

Found in gi|62898045, pyridoxine 5'-phosphate oxidase variant,

(1866.901,1+)

Ions Score: 46



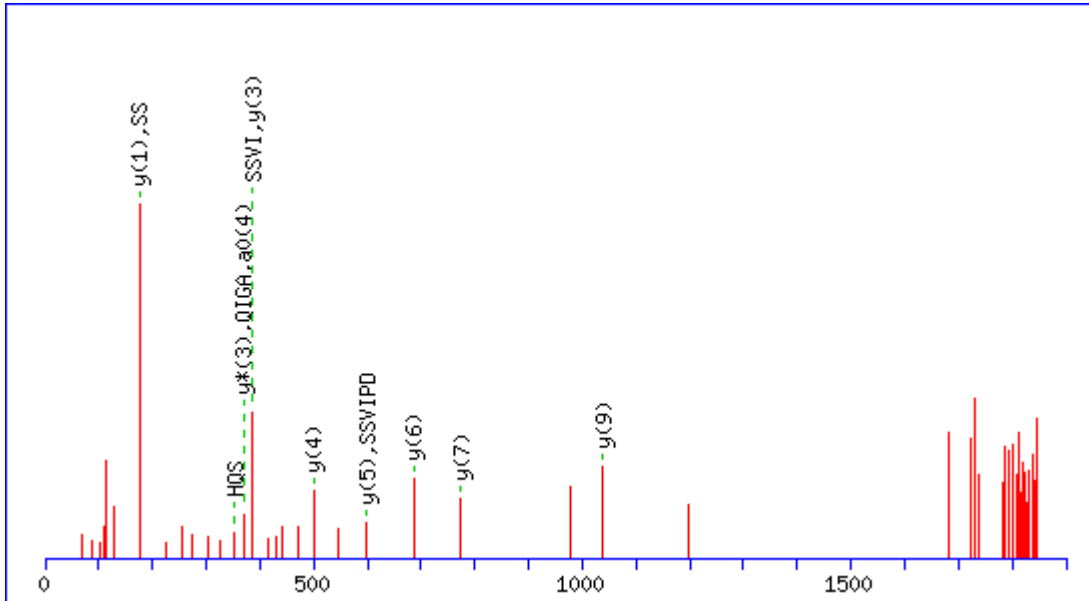

| # | Immon        | a            | a*           | a <sup>0</sup> | b            | b*           | b <sup>0</sup> | Seq. | v             | w             | w'            | y             | y*            | y <sup>0</sup> | #  |
|---|--------------|--------------|--------------|----------------|--------------|--------------|----------------|------|---------------|---------------|---------------|---------------|---------------|----------------|----|
| 1 | 60.044<br>4  | 60.044<br>4  |              | 42.033<br>8    | 88.039<br>3  |              | 70.028<br>7    | S    |               |               |               |               |               |                | 18 |
| 2 | 60.044<br>4  | 147.07<br>64 |              | 129.06<br>59   | 175.07<br>13 |              | 157.06<br>08   | S    | 1747.9<br>086 | 1746.9<br>133 |               | 1779.9<br>348 | 1762.9<br>082 | 1761.9<br>242  | 17 |
| 3 | 101.07<br>09 | 275.13<br>50 | 258.10<br>84 | 257.12<br>44   | 303.12<br>99 | 286.10<br>34 | 285.11<br>93   | Q    | 1619.8<br>500 | 1618.8<br>547 |               | 1692.9<br>028 | 1675.8<br>762 | 1674.8<br>922  | 16 |
| 4 | 86.096<br>4  | 388.21<br>91 | 371.19<br>25 | 370.20<br>85   | 416.21<br>40 | 399.18<br>74 | 398.20<br>34   | I    | 1506.7<br>659 | 1519.7<br>863 | 1533.8<br>020 | 1564.8<br>442 | 1547.8<br>176 | 1546.8<br>336  | 15 |
| 5 | 30.033<br>8  | 445.24<br>05 | 428.21<br>40 | 427.23<br>00   | 473.23<br>54 | 456.20<br>89 | 455.22<br>49   | G    |               |               |               | 1451.7<br>601 | 1434.7<br>336 | 1433.7<br>496  | 14 |
| 6 | 44.049<br>5  | 516.27<br>76 | 499.25<br>11 | 498.26<br>71   | 544.27<br>26 | 527.24<br>60 | 526.26<br>20   | A    | 1378.7<br>074 |               |               | 1394.7<br>387 | 1377.7<br>121 | 1376.7<br>281  | 13 |

|    |              |               |               |               |               |               |               |   |               |               |              |               |               |               |    |
|----|--------------|---------------|---------------|---------------|---------------|---------------|---------------|---|---------------|---------------|--------------|---------------|---------------|---------------|----|
| 7  | 72.080<br>8  | 615.34<br>61  | 598.31<br>95  | 597.33<br>55  | 643.34<br>10  | 626.31<br>44  | 625.33<br>04  | V | 1279.6<br>389 | 1292.6<br>593 |              | 1323.7<br>015 | 1306.6<br>750 | 1305.6<br>910 | 12 |
| 8  | 72.080<br>8  | 714.41<br>45  | 697.38<br>79  | 696.40<br>39  | 742.40<br>94  | 725.38<br>28  | 724.39<br>88  | V | 1180.5<br>705 | 1193.5<br>909 |              | 1224.6<br>331 | 1207.6<br>066 | 1206.6<br>226 | 11 |
| 9  | 60.044<br>4  | 801.44<br>65  | 784.41<br>99  | 783.43<br>59  | 829.44<br>14  | 812.41<br>49  | 811.43<br>08  | S | 1093.5<br>385 | 1092.5<br>432 |              | 1125.5<br>647 | 1108.5<br>382 | 1107.5<br>541 | 10 |
| 10 | 110.07<br>13 | 938.50<br>54  | 921.47<br>89  | 920.49<br>48  | 966.50<br>03  | 949.47<br>38  | 948.48<br>98  | H | 956.47<br>96  |               |              | 1038.5<br>327 | 1021.5<br>061 | 1020.5<br>221 | 9  |
| 11 | 101.07<br>09 | 1066.5<br>640 | 1049.5<br>374 | 1048.5<br>534 | 1094.5<br>589 | 1077.5<br>323 | 1076.5<br>483 | Q | 828.42<br>10  | 827.42<br>58  |              | 901.47<br>38  | 884.44<br>72  | 883.46<br>32  | 8  |
| 12 | 60.044<br>4  | 1153.5<br>960 | 1136.5<br>695 | 1135.5<br>854 | 1181.5<br>909 | 1164.5<br>644 | 1163.5<br>804 | S | 741.38<br>90  | 740.39<br>37  |              | 773.41<br>52  | 756.38<br>86  | 755.40<br>46  | 7  |
| 13 | 60.044<br>4  | 1240.6<br>280 | 1223.6<br>015 | 1222.6<br>175 | 1268.6<br>230 | 1251.5<br>964 | 1250.6<br>124 | S | 654.35<br>70  | 653.36<br>17  |              | 686.38<br>32  | 669.35<br>66  | 668.37<br>26  | 6  |
| 14 | 72.080<br>8  | 1339.6<br>965 | 1322.6<br>699 | 1321.6<br>859 | 1367.6<br>914 | 1350.6<br>648 | 1349.6<br>808 | V | 555.28<br>85  | 568.30<br>89  |              | 599.35<br>11  | 582.32<br>46  | 581.34<br>06  | 5  |
| 15 | 86.096<br>4  | 1452.7<br>805 | 1435.7<br>540 | 1434.7<br>700 | 1480.7<br>754 | 1463.7<br>489 | 1462.7<br>649 | I | 442.20<br>45  | 455.22<br>49  | 469.24<br>05 | 500.28<br>27  | 483.25<br>62  | 482.27<br>22  | 4  |
| 16 | 70.065<br>1  | 1549.8<br>333 | 1532.8<br>067 | 1531.8<br>227 | 1577.8<br>282 | 1560.8<br>016 | 1559.8<br>176 | P | 345.15<br>17  | 344.15<br>65  |              | 387.19<br>87  | 370.17<br>21  | 369.18<br>81  | 3  |
| 17 | 88.039<br>3  | 1664.8<br>602 | 1647.8<br>337 | 1646.8<br>497 | 1692.8<br>551 | 1675.8<br>286 | 1674.8<br>446 | D | 230.12<br>48  | 229.12<br>95  |              | 290.14<br>59  | 273.11<br>93  | 272.13<br>53  | 2  |
| 18 | 129.11<br>35 |               |               |               |               |               |               | R | 74.023<br>7   | 73.028<br>4   |              | 175.11<br>90  | 158.09<br>24  |               | 1  |

1273

MS/MS Fragmentation of VTPPEGYEVVTVFPK

Found in gi|1905874, carboxyl terminal LIM domain protein,

(1661.808,1+)

Ions Score: 39

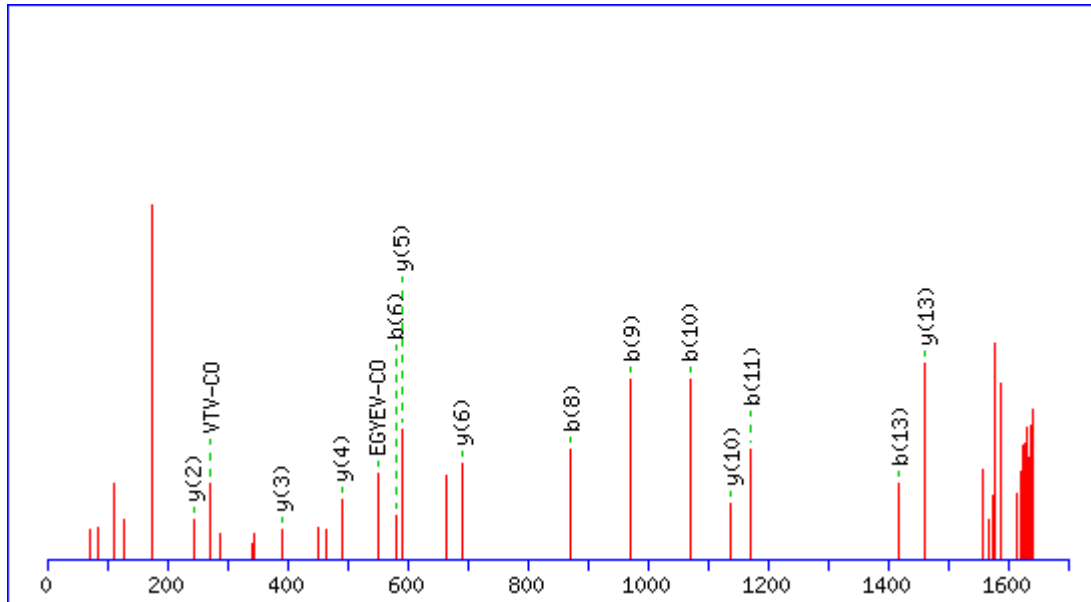

| # | Immon.   | a        | a <sup>0</sup> | b        | b <sup>0</sup> | Seq. | y                | y*        | y <sup>0</sup> | #  |
|---|----------|----------|----------------|----------|----------------|------|------------------|-----------|----------------|----|
| 1 | 72.0808  | 72.0808  |                | 100.0757 |                | V    |                  |           |                | 15 |
| 2 | 74.0600  | 173.1285 | 155.1179       | 201.1234 | 183.1128       | T    | 1562.8101        | 1545.7835 | 1544.7995      | 14 |
| 3 | 70.0651  | 270.1812 | 252.1707       | 298.1761 | 280.1656       | P    | <b>1461.7624</b> | 1444.7359 | 1443.7518      | 13 |
| 4 | 70.0651  | 367.2340 | 349.2234       | 395.2289 | 377.2183       | P    | 1364.7096        | 1347.6831 | 1346.6991      | 12 |
| 5 | 102.0550 | 496.2766 | 478.2660       | 524.2715 | 506.2609       | E    | 1267.6569        | 1250.6303 | 1249.6463      | 11 |

|           |          |           |           |                  |           |          |                  |           |           |           |
|-----------|----------|-----------|-----------|------------------|-----------|----------|------------------|-----------|-----------|-----------|
| <b>6</b>  | 30.0338  | 553.2980  | 535.2875  | <b>581.2930</b>  | 563.2824  | <b>G</b> | <b>1138.6143</b> | 1121.5877 | 1120.6037 | <b>10</b> |
| <b>7</b>  | 136.0757 | 716.3614  | 698.3508  | 744.3563         | 726.3457  | <b>Y</b> | 1081.5928        | 1064.5663 | 1063.5823 | <b>9</b>  |
| <b>8</b>  | 102.0550 | 845.4040  | 827.3934  | <b>873.3989</b>  | 855.3883  | <b>E</b> | 918.5295         | 901.5029  | 900.5189  | <b>8</b>  |
| <b>9</b>  | 72.0808  | 944.4724  | 926.4618  | <b>972.4673</b>  | 954.4567  | <b>V</b> | 789.4869         | 772.4604  | 771.4763  | <b>7</b>  |
| <b>10</b> | 72.0808  | 1043.5408 | 1025.5302 | <b>1071.5357</b> | 1053.5251 | <b>V</b> | <b>690.4185</b>  | 673.3919  | 672.4079  | <b>6</b>  |
| <b>11</b> | 74.0600  | 1144.5885 | 1126.5779 | <b>1172.5834</b> | 1154.5728 | <b>T</b> | <b>591.3501</b>  | 574.3235  | 573.3395  | <b>5</b>  |
| <b>12</b> | 72.0808  | 1243.6569 | 1225.6463 | 1271.6518        | 1253.6412 | <b>V</b> | <b>490.3024</b>  | 473.2758  |           | <b>4</b>  |
| <b>13</b> | 120.0808 | 1390.7253 | 1372.7147 | <b>1418.7202</b> | 1400.7096 | <b>F</b> | <b>391.2340</b>  | 374.2074  |           | <b>3</b>  |
| <b>14</b> | 70.0651  | 1487.7781 | 1469.7675 | 1515.7730        | 1497.7624 | <b>P</b> | <b>244.1656</b>  | 227.1390  |           | <b>2</b>  |
| <b>15</b> | 101.1073 |           |           |                  |           | <b>K</b> | 147.1128         | 130.0863  |           | <b>1</b>  |

1274

MS/MS Fragmentation of AQFAQPEILIGTIPGAGGTQR

Found in gi|1922287, enoyl-CoA hydratase,

(2125.177,1+)

Ions Score: 80

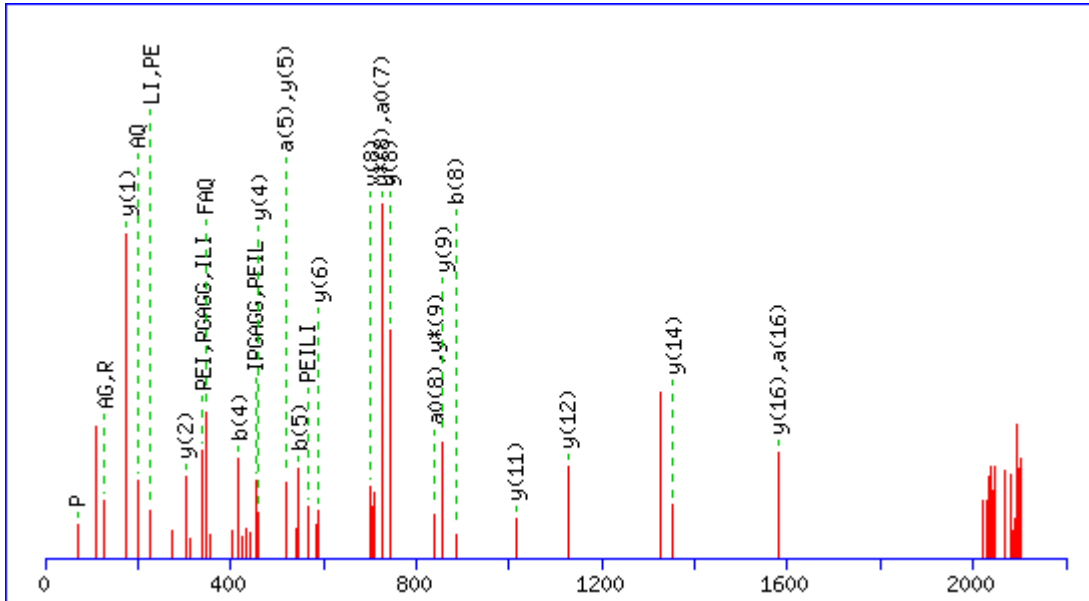

| # | Immon        | a            | a*           | a <sup>0</sup> | b            | b*           | b <sup>0</sup> | Seq. | v             | w             | w' | y             | y*            | y <sup>0</sup> | #  |
|---|--------------|--------------|--------------|----------------|--------------|--------------|----------------|------|---------------|---------------|----|---------------|---------------|----------------|----|
| 1 | 44.049<br>5  | 44.049<br>5  |              |                | 72.044<br>4  |              |                | A    |               |               |    |               |               |                | 21 |
| 2 | 101.07<br>09 | 172.10<br>81 | 155.08<br>15 |                | 200.10<br>30 | 183.07<br>64 |                | Q    | 1981.0<br>502 | 1980.0<br>549 |    | 2054.1<br>029 | 2037.0<br>764 | 2036.0<br>924  | 20 |
| 3 | 120.08<br>08 | 319.17<br>65 | 302.14<br>99 |                | 347.17<br>14 | 330.14<br>48 |                | F    | 1833.9<br>817 |               |    | 1926.0<br>443 | 1909.0<br>178 | 1908.0<br>338  | 19 |
| 4 | 44.049<br>5  | 390.21<br>36 | 373.18<br>70 |                | 418.20<br>85 | 401.18<br>19 |                | A    | 1762.9<br>446 |               |    | 1778.9<br>759 | 1761.9<br>494 | 1760.9<br>654  | 18 |
| 5 | 101.07<br>09 | 518.27<br>22 | 501.24<br>56 |                | 546.26<br>71 | 529.24<br>05 |                | Q    | 1634.8<br>860 | 1633.8<br>908 |    | 1707.9<br>388 | 1690.9<br>123 | 1689.9<br>282  | 17 |
| 6 | 70.065<br>1  | 615.32<br>49 | 598.29<br>84 |                | 643.31<br>98 | 626.29<br>33 |                | P    | 1537.8<br>333 | 1536.8<br>380 |    | 1579.8<br>802 | 1562.8<br>537 | 1561.8<br>697  | 16 |
| 7 | 102.05       | 744.36       | 727.34       | 726.35         | 772.36       | 755.33       | 754.35         | E    | 1408.7        | 1407.7        |    | 1482.8        | 1465.8        | 1464.8         | 15 |

|           |                           |                             |               |                            |                            |               |               |          |                            |               |               |                             |                            |               |           |
|-----------|---------------------------|-----------------------------|---------------|----------------------------|----------------------------|---------------|---------------|----------|----------------------------|---------------|---------------|-----------------------------|----------------------------|---------------|-----------|
|           | 50                        | 75                          | 10            | <b>70</b>                  | 24                         | 59            | 19            |          | 907                        | 954           |               | 275                         | 009                        | 169           |           |
| <b>8</b>  | 86.096<br>4               | 857.45<br>16                | 840.42<br>50  | <b>839.44</b><br><b>10</b> | <b>885.44</b><br><b>65</b> | 868.41<br>99  | 867.43<br>59  | <b>I</b> | 1295.7<br>066              | 1308.7<br>270 | 1322.7<br>427 | <b>1353.7</b><br><b>849</b> | 1336.7<br>583              | 1335.7<br>743 | <b>14</b> |
| <b>9</b>  | 86.096<br>4               | 970.53<br>56                | 953.50<br>91  | 952.52<br>51               | 998.53<br>06               | 981.50<br>40  | 980.52<br>00  | <b>L</b> | 1182.6<br>226              | 1181.6<br>273 |               | 1240.7<br>008               | 1223.6<br>743              | 1222.6<br>902 | <b>13</b> |
| <b>10</b> | 86.096<br>4               | 1083.6<br>197               | 1066.5<br>932 | 1065.6<br>091              | 1111.6<br>146              | 1094.5<br>881 | 1093.6<br>041 | <b>I</b> | 1069.5<br>385              | 1082.5<br>589 | 1096.5<br>746 | <b>1127.6</b><br><b>167</b> | 1110.5<br>902              | 1109.6<br>062 | <b>12</b> |
| <b>11</b> | 30.033<br>8               | 1140.6<br>412               | 1123.6<br>146 | 1122.6<br>306              | 1168.6<br>361              | 1151.6<br>095 | 1150.6<br>255 | <b>G</b> |                            |               |               | <b>1014.5</b><br><b>327</b> | 997.50<br>61               | 996.52<br>21  | <b>11</b> |
| <b>12</b> | 74.060<br>0               | 1241.6<br>889               | 1224.6<br>623 | 1223.6<br>783              | 1269.6<br>838              | 1252.6<br>572 | 1251.6<br>732 | <b>T</b> | 911.46<br>94               | 924.48<br>98  | 926.46<br>90  | 957.51<br>12                | 940.48<br>47               | 939.50<br>07  | <b>10</b> |
| <b>13</b> | 86.096<br>4               | 1354.7<br>729               | 1337.7<br>464 | 1336.7<br>624              | 1382.7<br>678              | 1365.7<br>413 | 1364.7<br>573 | <b>I</b> | 798.38<br>53               | 811.40<br>57  | 825.42<br>13  | <b>856.46</b><br><b>35</b>  | <b>839.43</b><br><b>70</b> | 838.45<br>30  | <b>9</b>  |
| <b>14</b> | <b>70.065</b><br><b>1</b> | 1451.8<br>257               | 1434.7<br>991 | 1433.8<br>151              | 1479.8<br>206              | 1462.7<br>940 | 1461.8<br>100 | <b>P</b> | <b>701.33</b><br><b>25</b> | 700.33<br>73  |               | <b>743.37</b><br><b>95</b>  | <b>726.35</b><br><b>29</b> | 725.36<br>89  | <b>8</b>  |
| <b>15</b> | 30.033<br>8               | 1508.8<br>471               | 1491.8<br>206 | 1490.8<br>366              | 1536.8<br>421              | 1519.8<br>155 | 1518.8<br>315 | <b>G</b> |                            |               |               | 646.32<br>67                | 629.30<br>02               | 628.31<br>61  | <b>7</b>  |
| <b>16</b> | 44.049<br>5               | <b>1579.8</b><br><b>843</b> | 1562.8<br>577 | 1561.8<br>737              | 1607.8<br>792              | 1590.8<br>526 | 1589.8<br>686 | <b>A</b> | 573.27<br>40               |               |               | <b>589.30</b><br><b>53</b>  | 572.27<br>87               | 571.29<br>47  | <b>6</b>  |
| <b>17</b> | 30.033<br>8               | 1636.9<br>057               | 1619.8<br>792 | 1618.8<br>952              | 1664.9<br>006              | 1647.8<br>741 | 1646.8<br>901 | <b>G</b> |                            |               |               | <b>518.26</b><br><b>81</b>  | 501.24<br>16               | 500.25<br>76  | <b>5</b>  |
| <b>18</b> | 30.033<br>8               | 1693.9<br>272               | 1676.9<br>006 | 1675.9<br>166              | 1721.9<br>221              | 1704.8<br>956 | 1703.9<br>115 | <b>G</b> |                            |               |               | <b>461.24</b><br><b>67</b>  | 444.22<br>01               | 443.23<br>61  | <b>4</b>  |
| <b>19</b> | 74.060<br>0               | 1794.9<br>749               | 1777.9<br>483 | 1776.9<br>643              | 1822.9<br>698              | 1805.9<br>432 | 1804.9<br>592 | <b>T</b> | 358.18<br>33               | 371.20<br>37  | 373.18<br>30  | 404.22<br>52                | 387.19<br>87               | 386.21<br>46  | <b>3</b>  |
| <b>20</b> | 101.07<br>09              | 1923.0<br>334               | 1906.0<br>069 | 1905.0<br>229              | 1951.0<br>284              | 1934.0<br>018 | 1933.0<br>178 | <b>Q</b> | 230.12<br>48               | 229.12<br>95  |               | <b>303.17</b><br><b>75</b>  | 286.15<br>10               |               | <b>2</b>  |

|    |              |  |  |  |  |  |  |   |             |             |  |              |              |  |  |   |
|----|--------------|--|--|--|--|--|--|---|-------------|-------------|--|--------------|--------------|--|--|---|
| 21 | 129.11<br>35 |  |  |  |  |  |  | R | 74.023<br>7 | 73.028<br>4 |  | 175.11<br>90 | 158.09<br>24 |  |  | 1 |
|----|--------------|--|--|--|--|--|--|---|-------------|-------------|--|--------------|--------------|--|--|---|

1275

MS/MS Fragmentation of ELFSPLHALNFGIGDTTR

Found in gi|4505585, platelet-activating factor acetylhydrolase,

(2045.0693,1+)

Ions Score: 122

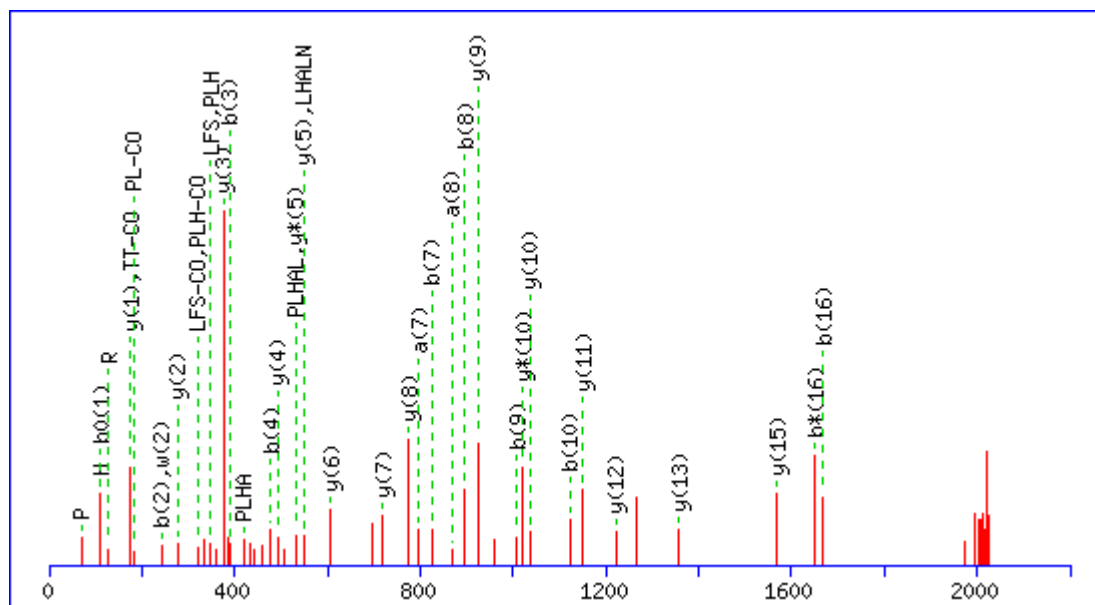

| # | Immon  | a      | a* | a <sup>0</sup> | b      | b* | b <sup>0</sup> | Seq. | v | w | w' | y | y* | y <sup>0</sup> | #  |
|---|--------|--------|----|----------------|--------|----|----------------|------|---|---|----|---|----|----------------|----|
| 1 | 102.05 | 102.05 |    | 84.044         | 130.04 |    | 112.03         | E    |   |   |    |   |    |                | 19 |

|           |                            |                            |               |               |                             |               |               |          |               |               |              |                             |                             |               |           |
|-----------|----------------------------|----------------------------|---------------|---------------|-----------------------------|---------------|---------------|----------|---------------|---------------|--------------|-----------------------------|-----------------------------|---------------|-----------|
|           | 50                         | 50                         |               | 4             | 99                          |               | <b>93</b>     |          |               |               |              |                             |                             |               |           |
| <b>2</b>  | 86.096<br>4                | 215.13<br>90               |               | 197.12<br>85  | <b>243.13</b><br><b>39</b>  |               | 225.12<br>34  | <b>L</b> | 1857.9<br>242 | 1856.9<br>290 |              | 1916.0<br>025               | 1898.9<br>759               | 1897.9<br>919 | <b>18</b> |
| <b>3</b>  | 120.08<br>08               | 362.20<br>74               |               | 344.19<br>69  | <b>390.20</b><br><b>23</b>  |               | 372.19<br>18  | <b>F</b> | 1710.8<br>558 |               |              | 1802.9<br>184               | 1785.8<br>919               | 1784.9<br>078 | <b>17</b> |
| <b>4</b>  | 60.044<br>4                | 449.23<br>95               |               | 431.22<br>89  | <b>477.23</b><br><b>44</b>  |               | 459.22<br>38  | <b>S</b> | 1623.8<br>238 | 1622.8<br>285 |              | 1655.8<br>500               | 1638.8<br>234               | 1637.8<br>394 | <b>16</b> |
| <b>5</b>  | <b>70.065</b><br><b>1</b>  | 546.29<br>22               |               | 528.28<br>17  | 574.28<br>71                |               | 556.27<br>66  | <b>P</b> | 1526.7<br>710 | 1525.7<br>758 |              | <b>1568.8</b><br><b>180</b> | 1551.7<br>914               | 1550.8<br>074 | <b>15</b> |
| <b>6</b>  | 86.096<br>4                | 659.37<br>63               |               | 641.36<br>57  | 687.37<br>12                |               | 669.36<br>06  | <b>L</b> | 1413.6<br>870 | 1412.6<br>917 |              | 1471.7<br>652               | 1454.7<br>387               | 1453.7<br>546 | <b>14</b> |
| <b>7</b>  | <b>110.07</b><br><b>13</b> | <b>796.43</b><br><b>52</b> |               | 778.42<br>46  | <b>824.43</b><br><b>01</b>  |               | 806.41<br>95  | <b>H</b> | 1276.6<br>280 |               |              | <b>1358.6</b><br><b>811</b> | 1341.6<br>546               | 1340.6<br>706 | <b>13</b> |
| <b>8</b>  | 44.049<br>5                | <b>867.47</b><br><b>23</b> |               | 849.46<br>17  | <b>895.46</b><br><b>72</b>  |               | 877.45<br>67  | <b>A</b> | 1205.5<br>909 |               |              | <b>1221.6</b><br><b>222</b> | 1204.5<br>957               | 1203.6<br>117 | <b>12</b> |
| <b>9</b>  | 86.096<br>4                | 980.55<br>64               |               | 962.54<br>58  | <b>1008.5</b><br><b>513</b> |               | 990.54<br>07  | <b>L</b> | 1092.5<br>069 | 1091.5<br>116 |              | <b>1150.5</b><br><b>851</b> | 1133.5<br>586               | 1132.5<br>745 | <b>11</b> |
| <b>10</b> | 87.055<br>3                | 1094.5<br>993              | 1077.5<br>728 | 1076.5<br>887 | <b>1122.5</b><br><b>942</b> | 1105.5<br>677 | 1104.5<br>837 | <b>N</b> | 978.46<br>39  | 977.46<br>87  |              | <b>1037.5</b><br><b>010</b> | <b>1020.4</b><br><b>745</b> | 1019.4<br>905 | <b>10</b> |
| <b>11</b> | 120.08<br>08               | 1241.6<br>677              | 1224.6<br>412 | 1223.6<br>572 | 1269.6<br>626               | 1252.6<br>361 | 1251.6<br>521 | <b>F</b> | 831.39<br>55  |               |              | <b>923.45</b><br><b>81</b>  | 906.43<br>16                | 905.44<br>76  | <b>9</b>  |
| <b>12</b> | 30.033<br>8                | 1298.6<br>892              | 1281.6<br>626 | 1280.6<br>786 | 1326.6<br>841               | 1309.6<br>575 | 1308.6<br>735 | <b>G</b> |               |               |              | <b>776.38</b><br><b>97</b>  | 759.36<br>32                | 758.37<br>91  | <b>8</b>  |
| <b>13</b> | 86.096<br>4                | 1411.7<br>732              | 1394.7<br>467 | 1393.7<br>627 | 1439.7<br>682               | 1422.7<br>416 | 1421.7<br>576 | <b>I</b> | 661.29<br>00  | 674.31<br>04  | 688.32<br>60 | <b>719.36</b><br><b>82</b>  | 702.34<br>17                | 701.35<br>77  | <b>7</b>  |
| <b>14</b> | 30.033<br>8                | 1468.7<br>947              | 1451.7<br>682 | 1450.7<br>841 | 1496.7<br>896               | 1479.7<br>631 | 1478.7<br>791 | <b>G</b> |               |               |              | <b>606.28</b><br><b>42</b>  | 589.25<br>76                | 588.27<br>36  | <b>6</b>  |



|           |                            |               |               |               |                             |                             |               |          |              |                            |              |                            |                            |              |          |
|-----------|----------------------------|---------------|---------------|---------------|-----------------------------|-----------------------------|---------------|----------|--------------|----------------------------|--------------|----------------------------|----------------------------|--------------|----------|
| <b>15</b> | 30.033<br>8                | 1525.8<br>162 | 1508.7<br>896 | 1507.8<br>056 | 1553.8<br>111               | 1536.7<br>845               | 1535.8<br>005 | <b>G</b> |              |                            |              | <b>549.26</b><br><b>27</b> | <b>532.23</b><br><b>62</b> | 531.25<br>22 | <b>5</b> |
| <b>16</b> | 88.039<br>3                | 1640.8<br>431 | 1623.8<br>166 | 1622.8<br>326 | <b>1668.8</b><br><b>380</b> | <b>1651.8</b><br><b>115</b> | 1650.8<br>275 | <b>D</b> | 432.22<br>01 | 431.22<br>49               |              | <b>492.24</b><br><b>13</b> | 475.21<br>47               | 474.23<br>07 | <b>4</b> |
| <b>17</b> | 74.060<br>0                | 1741.8<br>908 | 1724.8<br>642 | 1723.8<br>802 | 1769.8<br>857               | 1752.8<br>592               | 1751.8<br>751 | <b>T</b> | 331.17<br>24 | 344.19<br>28               | 346.17<br>21 | <b>377.21</b><br><b>43</b> | 360.18<br>78               | 359.20<br>37 | <b>3</b> |
| <b>18</b> | 74.060<br>0                | 1842.9<br>385 | 1825.9<br>119 | 1824.9<br>279 | 1870.9<br>334               | 1853.9<br>068               | 1852.9<br>228 | <b>T</b> | 230.12<br>48 | <b>243.14</b><br><b>52</b> | 245.12<br>44 | <b>276.16</b><br><b>66</b> | 259.14<br>01               | 258.15<br>61 | <b>2</b> |
| <b>19</b> | <b>129.11</b><br><b>35</b> |               |               |               |                             |                             |               | <b>R</b> | 74.023<br>7  | 73.028<br>4                |              | <b>175.11</b><br><b>90</b> | 158                        |              |          |

1276

MS/MS Fragmentation of EELQLLQEQGSYVGEVVR

Found in gi|62087652, proteasome 26S ATPase,

(2076.1179,1+)

Ions Score: 66

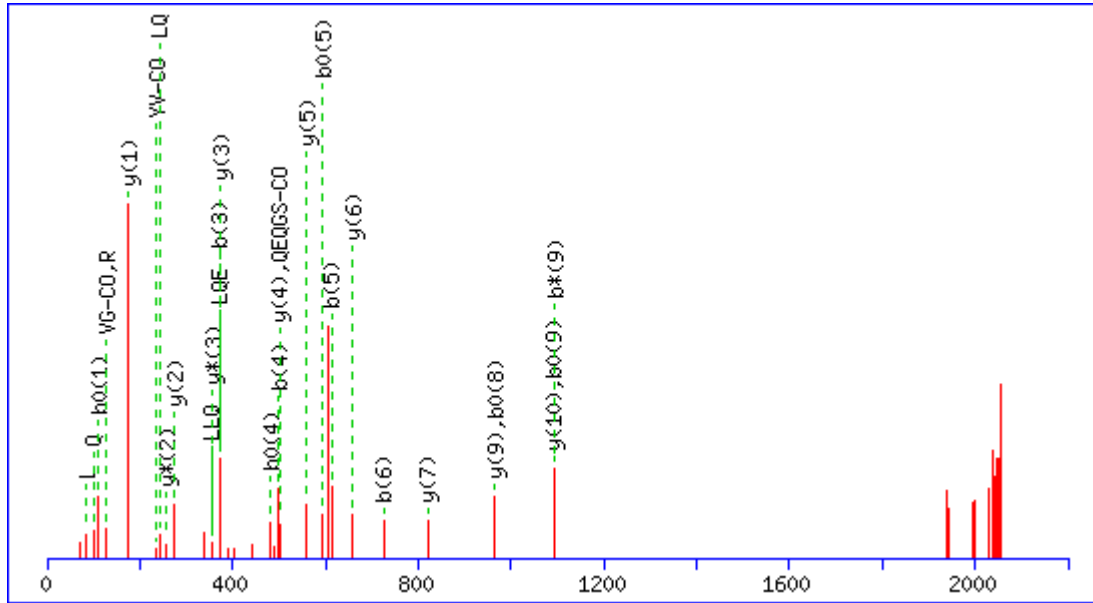

| # | Immon                      | a            | a*           | a <sup>0</sup> | b                          | b*           | b <sup>0</sup>             | Seq. | v             | w             | y             | y*            | y <sup>0</sup> | #  |
|---|----------------------------|--------------|--------------|----------------|----------------------------|--------------|----------------------------|------|---------------|---------------|---------------|---------------|----------------|----|
| 1 | 102.055<br>0               | 102.055<br>0 |              | 84.0444        | 130.049<br>9               |              | <b>112.039</b><br><b>3</b> | E    |               |               |               |               |                | 18 |
| 2 | 102.055<br>0               | 231.097<br>5 |              | 213.087<br>0   | 259.092<br>5               |              | 241.081<br>9               | E    | 1872.98<br>14 | 1871.98<br>62 | 1947.01<br>82 | 1929.99<br>16 | 1929.00<br>76  | 17 |
| 3 | <b>86.0964</b>             | 344.181<br>6 |              | 326.171<br>0   | <b>372.176</b><br><b>5</b> |              | 354.166<br>0               | L    | 1759.89<br>73 | 1758.90<br>21 | 1817.97<br>56 | 1800.94<br>90 | 1799.96<br>50  | 16 |
| 4 | <b>101.070</b><br><b>9</b> | 472.240<br>2 | 455.213<br>6 | 454.229<br>6   | <b>500.235</b><br><b>1</b> | 483.208<br>6 | <b>482.224</b><br><b>5</b> | Q    | 1631.83<br>88 | 1630.84<br>35 | 1704.89<br>15 | 1687.86<br>50 | 1686.88<br>10  | 15 |
| 5 | <b>86.0964</b>             | 585.324<br>3 | 568.297<br>7 | 567.313<br>7   | <b>613.319</b><br><b>2</b> | 596.292<br>6 | <b>595.308</b><br><b>6</b> | L    | 1518.75<br>47 | 1517.75<br>95 | 1576.83<br>29 | 1559.80<br>64 | 1558.82<br>24  | 14 |
| 6 | <b>86.0964</b>             | 698.408<br>3 | 681.381<br>8 | 680.397<br>8   | <b>726.403</b><br><b>2</b> | 709.376<br>7 | 708.392<br>7               | L    | 1405.67<br>06 | 1404.67<br>54 | 1463.74<br>89 | 1446.72<br>23 | 1445.73<br>83  | 13 |

|    |                     |               |               |               |               |                      |                      |   |               |               |                      |                     |               |    |
|----|---------------------|---------------|---------------|---------------|---------------|----------------------|----------------------|---|---------------|---------------|----------------------|---------------------|---------------|----|
| 7  | <b>101.070</b><br>9 | 826.466<br>9  | 809.440<br>3  | 808.456<br>3  | 854.461<br>8  | 837.435<br>3         | 836.451<br>2         | Q | 1277.61<br>21 | 1276.61<br>68 | 1350.66<br>48        | 1333.63<br>83       | 1332.65<br>43 | 12 |
| 8  | 102.055<br>0        | 955.509<br>5  | 938.482<br>9  | 937.498<br>9  | 983.504<br>4  | 966.477<br>9         | <b>965.493</b><br>8  | E | 1148.56<br>95 | 1147.57<br>42 | 1222.60<br>62        | 1205.57<br>97       | 1204.59<br>57 | 11 |
| 9  | <b>101.070</b><br>9 | 1083.56<br>81 | 1066.54<br>15 | 1065.55<br>75 | 1111.56<br>30 | <b>1094.53</b><br>64 | <b>1093.55</b><br>24 | Q | 1020.51<br>09 | 1019.51<br>56 | <b>1093.56</b><br>37 | 1076.53<br>71       | 1075.55<br>31 | 10 |
| 10 | 30.0338             | 1140.58<br>95 | 1123.56<br>30 | 1122.57<br>90 | 1168.58<br>44 | 1151.55<br>79        | 1150.57<br>39        | G |               |               | <b>965.505</b><br>1  | 948.478<br>5        | 947.494<br>5  | 9  |
| 11 | 60.0444             | 1227.62<br>16 | 1210.59<br>50 | 1209.61<br>10 | 1255.61<br>65 | 1238.58<br>99        | 1237.60<br>59        | S | 876.457<br>4  | 875.462<br>1  | 908.483<br>6         | 891.457<br>1        | 890.473<br>0  | 8  |
| 12 | 136.075<br>7        | 1390.68<br>49 | 1373.65<br>83 | 1372.67<br>43 | 1418.67<br>98 | 1401.65<br>33        | 1400.66<br>92        | Y | 713.394<br>1  |               | <b>821.451</b><br>6  | 804.425<br>0        | 803.441<br>0  | 7  |
| 13 | 72.0808             | 1489.75<br>33 | 1472.72<br>68 | 1471.74<br>27 | 1517.74<br>82 | 1500.72<br>17        | 1499.73<br>77        | V | 614.325<br>7  | 627.346<br>1  | <b>658.388</b><br>3  | 641.361<br>7        | 640.377<br>7  | 6  |
| 14 | 30.0338             | 1546.77<br>48 | 1529.74<br>82 | 1528.76<br>42 | 1574.76<br>97 | 1557.74<br>31        | 1556.75<br>91        | G |               |               | <b>559.319</b><br>8  | 542.293<br>3        | 541.309<br>3  | 5  |
| 15 | 102.055<br>0        | 1675.81<br>74 | 1658.79<br>08 | 1657.80<br>68 | 1703.81<br>23 | 1686.78<br>57        | 1685.80<br>17        | E | 428.261<br>6  | 427.266<br>3  | <b>502.298</b><br>4  | 485.271<br>8        | 484.287<br>8  | 4  |
| 16 | 72.0808             | 1774.88<br>58 | 1757.85<br>92 | 1756.87<br>52 | 1802.88<br>07 | 1785.85<br>41        | 1784.87<br>01        | V | 329.193<br>2  | 342.213<br>6  | <b>373.255</b><br>8  | <b>356.229</b><br>2 |               | 3  |
| 17 | 72.0808             | 1873.95<br>42 | 1856.92<br>76 | 1855.94<br>36 | 1901.94<br>91 | 1884.92<br>26        | 1883.93<br>85        | V | 230.124<br>8  | 243.145<br>2  | <b>274.187</b><br>4  | <b>257.160</b><br>8 |               | 2  |
| 18 | <b>129.113</b><br>5 |               |               |               |               |                      |                      | R | 74.0237       | 73.0284       | <b>175.119</b><br>0  | 158.092<br>4        |               | 1  |

MS/MS Fragmentation of IPADVDPPLTITSSLSSDGVLTVNGPR

Found in gi|537532, alpha-B-crystallin,

(2624.4412,1+)

Ions Score: 172

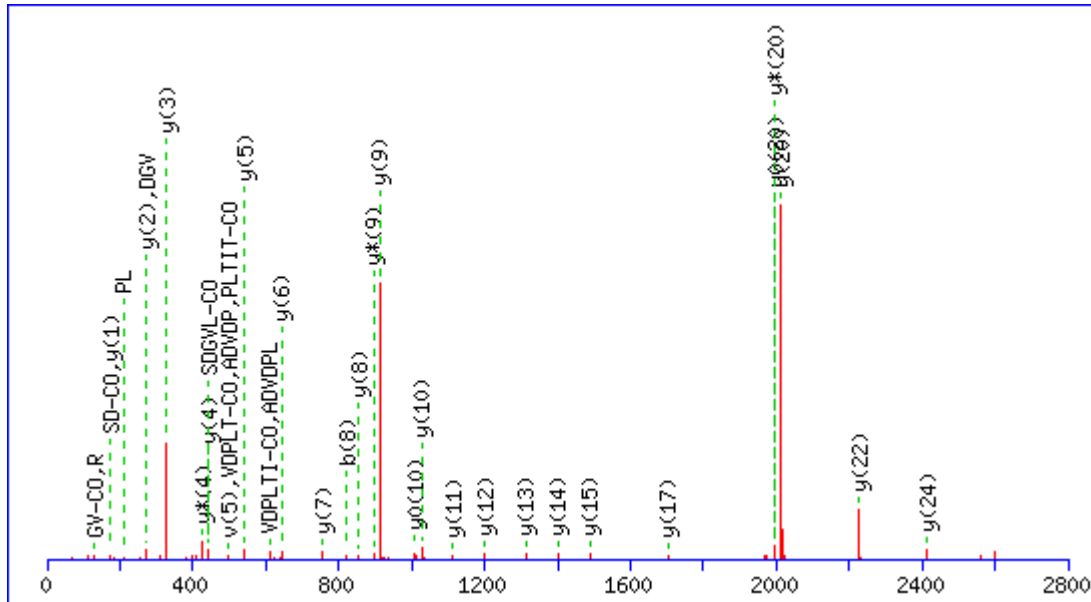

| # | Immon       | a            | a* | a <sup>0</sup> | b            | b* | b <sup>0</sup> | Seq. | v             | w             | w' | y             | y*            | y <sup>0</sup> | #  |
|---|-------------|--------------|----|----------------|--------------|----|----------------|------|---------------|---------------|----|---------------|---------------|----------------|----|
| 1 | 86.096<br>4 | 86.096<br>4  |    |                | 114.09<br>13 |    |                | I    |               |               |    |               |               |                | 26 |
| 2 | 70.065<br>1 | 183.14<br>92 |    |                | 211.14<br>41 |    |                | P    | 2469.2<br>467 | 2468.2<br>515 |    | 2511.2<br>937 | 2494.2<br>671 | 2493.2<br>831  | 25 |
| 3 | 44.049      | 254.18       |    |                | 282.18       |    |                | A    | 2398.2        |               |    | 2414.2        | 2397.2        | 2396.2         | 24 |

|           |             |               |  |               |                            |  |               |          |               |               |               |                             |                             |                             |           |
|-----------|-------------|---------------|--|---------------|----------------------------|--|---------------|----------|---------------|---------------|---------------|-----------------------------|-----------------------------|-----------------------------|-----------|
|           | 5           | 63            |  |               | 12                         |  |               |          | 096           |               |               | <b>409</b>                  | 144                         | 304                         |           |
| <b>4</b>  | 88.039<br>3 | 369.21<br>32  |  | 351.20<br>27  | 397.20<br>82               |  | 379.19<br>76  | <b>D</b> | 2283.1<br>827 | 2282.1<br>874 |               | 2343.2<br>038               | 2326.1<br>773               | 2325.1<br>932               | <b>23</b> |
| <b>5</b>  | 72.080<br>8 | 468.28<br>17  |  | 450.27<br>11  | 496.27<br>66               |  | 478.26<br>60  | <b>V</b> | 2184.1<br>143 | 2197.1<br>347 |               | <b>2228.1</b><br><b>769</b> | 2211.1<br>503               | 2210.1<br>663               | <b>22</b> |
| <b>6</b>  | 88.039<br>3 | 583.30<br>86  |  | 565.29<br>80  | <b>611.30</b><br><b>35</b> |  | 593.29<br>30  | <b>D</b> | 2069.0<br>873 | 2068.0<br>921 |               | 2129.1<br>085               | 2112.0<br>819               | 2111.0<br>979               | <b>21</b> |
| <b>7</b>  | 70.065<br>1 | 680.36<br>14  |  | 662.35<br>08  | 708.35<br>63               |  | 690.34<br>57  | <b>P</b> | 1972.0<br>346 | 1971.0<br>393 |               | <b>2014.0</b><br><b>815</b> | <b>1997.0</b><br><b>550</b> | <b>1996.0</b><br><b>709</b> | <b>20</b> |
| <b>8</b>  | 86.096<br>4 | 793.44<br>54  |  | 775.43<br>49  | <b>821.44</b><br><b>03</b> |  | 803.42<br>98  | <b>L</b> | 1858.9<br>505 | 1857.9<br>552 |               | 1917.0<br>287               | 1900.0<br>022               | 1899.0<br>182               | <b>19</b> |
| <b>9</b>  | 74.060<br>0 | 894.49<br>31  |  | 876.48<br>25  | 922.48<br>80               |  | 904.47<br>75  | <b>T</b> | 1757.9<br>028 | 1770.9<br>232 | 1772.9<br>025 | 1803.9<br>447               | 1786.9<br>181               | 1785.9<br>341               | <b>18</b> |
| <b>10</b> | 86.096<br>4 | 1007.5<br>772 |  | 989.56<br>66  | 1035.5<br>721              |  | 1017.5<br>615 | <b>I</b> | 1644.8<br>188 | 1657.8<br>392 | 1671.8<br>548 | <b>1702.8</b><br><b>970</b> | 1685.8<br>705               | 1684.8<br>864               | <b>17</b> |
| <b>11</b> | 74.060<br>0 | 1108.6<br>249 |  | 1090.6<br>143 | 1136.6<br>198              |  | 1118.6<br>092 | <b>T</b> | 1543.7<br>711 | 1556.7<br>915 | 1558.7<br>707 | 1589.8<br>129               | 1572.7<br>864               | 1571.8<br>024               | <b>16</b> |
| <b>12</b> | 60.044<br>4 | 1195.6<br>569 |  | 1177.6<br>463 | 1223.6<br>518              |  | 1205.6<br>412 | <b>S</b> | 1456.7<br>390 | 1455.7<br>438 |               | <b>1488.7</b><br><b>653</b> | 1471.7<br>387               | 1470.7<br>547               | <b>15</b> |
| <b>13</b> | 60.044<br>4 | 1282.6<br>889 |  | 1264.6<br>783 | 1310.6<br>838              |  | 1292.6<br>733 | <b>S</b> | 1369.7<br>070 | 1368.7<br>118 |               | <b>1401.7</b><br><b>332</b> | 1384.7<br>067               | 1383.7<br>227               | <b>14</b> |
| <b>14</b> | 86.096<br>4 | 1395.7<br>730 |  | 1377.7<br>624 | 1423.7<br>679              |  | 1405.7<br>573 | <b>L</b> | 1256.6<br>230 | 1255.6<br>277 |               | <b>1314.7</b><br><b>012</b> | 1297.6<br>747               | 1296.6<br>906               | <b>13</b> |
| <b>15</b> | 60.044<br>4 | 1482.8<br>050 |  | 1464.7<br>944 | 1510.7<br>999              |  | 1492.7<br>894 | <b>S</b> | 1169.5<br>909 | 1168.5<br>957 |               | <b>1201.6</b><br><b>171</b> | 1184.5<br>906               | 1183.6<br>066               | <b>12</b> |
| <b>16</b> | 60.044<br>4 | 1569.8<br>370 |  | 1551.8<br>265 | 1597.8<br>319              |  | 1579.8<br>214 | <b>S</b> | 1082.5<br>589 | 1081.5<br>636 |               | <b>1114.5</b><br><b>851</b> | 1097.5<br>586               | 1096.5<br>745               | <b>11</b> |

|           |                            |               |               |               |               |               |               |          |                            |              |              |                             |                            |                             |           |
|-----------|----------------------------|---------------|---------------|---------------|---------------|---------------|---------------|----------|----------------------------|--------------|--------------|-----------------------------|----------------------------|-----------------------------|-----------|
| <b>17</b> | 88.039<br>3                | 1684.8<br>640 |               | 1666.8<br>534 | 1712.8<br>589 |               | 1694.8<br>483 | <b>D</b> | 967.53<br>20               | 966.53<br>67 |              | <b>1027.5</b><br><b>531</b> | 1010.5<br>265              | <b>1009.5</b><br><b>425</b> | <b>10</b> |
| <b>18</b> | 30.033<br>8                | 1741.8<br>854 |               | 1723.8<br>749 | 1769.8<br>804 |               | 1751.8<br>698 | <b>G</b> |                            |              |              | <b>912.52</b><br><b>61</b>  | <b>895.49</b><br><b>96</b> | 894.51<br>56                | <b>9</b>  |
| <b>19</b> | 72.080<br>8                | 1840.9<br>539 |               | 1822.9<br>433 | 1868.9<br>488 |               | 1850.9<br>382 | <b>V</b> | 811.44<br>21               | 824.46<br>25 |              | <b>855.50</b><br><b>47</b>  | 838.47<br>81               | 837.49<br>41                | <b>8</b>  |
| <b>20</b> | 86.096<br>4                | 1954.0<br>379 |               | 1936.0<br>273 | 1982.0<br>328 |               | 1964.0<br>223 | <b>L</b> | 698.35<br>80               | 697.36<br>28 |              | <b>756.43</b><br><b>63</b>  | 739.40<br>97               | 738.42<br>57                | <b>7</b>  |
| <b>21</b> | 74.060<br>0                | 2055.0<br>856 |               | 2037.0<br>750 | 2083.0<br>805 |               | 2065.0<br>699 | <b>T</b> | 597.31<br>03               | 610.33<br>07 | 612.31<br>00 | <b>643.35</b><br><b>22</b>  | 626.32<br>57               | 625.34<br>16                | <b>6</b>  |
| <b>22</b> | 72.080<br>8                | 2154.1<br>540 |               | 2136.1<br>434 | 2182.1<br>489 |               | 2164.1<br>384 | <b>V</b> | <b>498.24</b><br><b>19</b> | 511.26<br>23 |              | <b>542.30</b><br><b>45</b>  | 525.27<br>80               |                             | <b>5</b>  |
| <b>23</b> | 87.055<br>3                | 2268.1<br>969 | 2251.1<br>704 | 2250.1<br>864 | 2296.1<br>918 | 2279.1<br>653 | 2278.1<br>813 | <b>N</b> | 384.19<br>90               | 383.20<br>37 |              | <b>443.23</b><br><b>61</b>  | <b>426.20</b><br><b>96</b> |                             | <b>4</b>  |
| <b>24</b> | 30.033<br>8                | 2325.2<br>184 | 2308.1<br>918 | 2307.2<br>078 | 2353.2<br>133 | 2336.1<br>868 | 2335.2<br>027 | <b>G</b> |                            |              |              | <b>329.19</b><br><b>32</b>  | 312.16<br>66               |                             | <b>3</b>  |
| <b>25</b> | 70.065<br>1                | 2422.2<br>712 | 2405.2<br>446 | 2404.2<br>606 | 2450.2<br>661 | 2433.2<br>395 | 2432.2<br>555 | <b>P</b> | 230.12<br>48               | 229.12<br>95 |              | <b>272.17</b><br><b>17</b>  | 255.14<br>52               |                             | <b>2</b>  |
| <b>26</b> | <b>129.11</b><br><b>35</b> |               |               |               |               |               |               | <b>R</b> | 74.023<br>7                | 73.028<br>4  |              | <b>175.11</b><br><b>90</b>  | 158.09<br>24               |                             | <b>1</b>  |

1278

MS/MS Fragmentation of SLEYLDLSFNQIAR

Found in gi|642534, lumican,

(1668.8555,1+)

Ions Score: 50

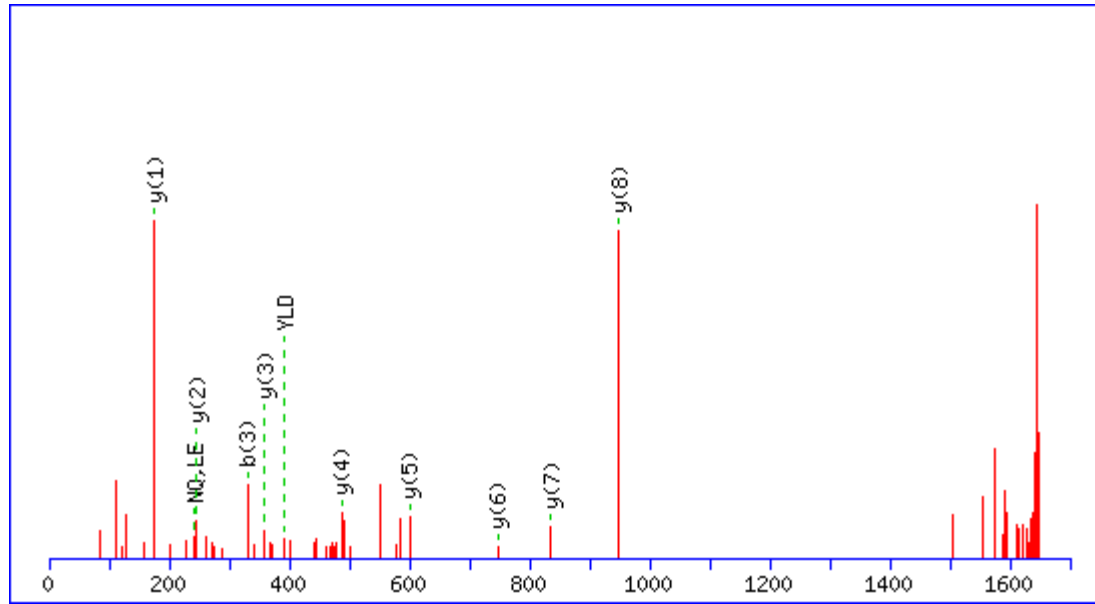

| # | Immon        | a            | a* | a <sup>0</sup> | b            | b* | b <sup>0</sup> | Seq. | v             | w             | w' | y             | y*            | y <sup>0</sup> | #  |
|---|--------------|--------------|----|----------------|--------------|----|----------------|------|---------------|---------------|----|---------------|---------------|----------------|----|
| 1 | 60.044<br>4  | 60.044<br>4  |    | 42.033<br>8    | 88.039<br>3  |    | 70.028<br>7    | S    |               |               |    |               |               |                | 14 |
| 2 | 86.096<br>4  | 173.12<br>85 |    | 155.11<br>79   | 201.12<br>34 |    | 183.11<br>28   | L    | 1523.7<br>489 | 1522.7<br>536 |    | 1581.8<br>271 | 1564.8<br>006 | 1563.8<br>166  | 13 |
| 3 | 102.05<br>50 | 302.17<br>10 |    | 284.16<br>05   | 330.16<br>60 |    | 312.15<br>54   | E    | 1394.7<br>063 | 1393.7<br>110 |    | 1468.7<br>431 | 1451.7<br>165 | 1450.7<br>325  | 12 |
| 4 | 136.07<br>57 | 465.23<br>44 |    | 447.22<br>38   | 493.22<br>93 |    | 475.21<br>87   | Y    | 1231.6<br>430 |               |    | 1339.7<br>005 | 1322.6<br>739 | 1321.6<br>899  | 11 |

|           |              |               |               |               |               |               |               |          |               |               |              |                      |               |               |           |
|-----------|--------------|---------------|---------------|---------------|---------------|---------------|---------------|----------|---------------|---------------|--------------|----------------------|---------------|---------------|-----------|
| <b>5</b>  | 86.096<br>4  | 578.31<br>84  |               | 560.30<br>79  | 606.31<br>34  |               | 588.30<br>28  | <b>L</b> | 1118.5<br>589 | 1117.5<br>636 |              | 1176.6<br>371        | 1159.6<br>106 | 1158.6<br>266 | <b>10</b> |
| <b>6</b>  | 88.039<br>3  | 693.34<br>54  |               | 675.33<br>48  | 721.34<br>03  |               | 703.32<br>97  | <b>D</b> | 1003.5<br>320 | 1002.5<br>367 |              | 1063.5<br>531        | 1046.5<br>265 | 1045.5<br>425 | <b>9</b>  |
| <b>7</b>  | 86.096<br>4  | 806.42<br>94  |               | 788.41<br>89  | 834.42<br>44  |               | 816.41<br>38  | <b>L</b> | 890.44<br>79  | 889.45<br>26  |              | <b>948.52<br/>61</b> | 931.49<br>96  | 930.51<br>56  | <b>8</b>  |
| <b>8</b>  | 60.044<br>4  | 893.46<br>15  |               | 875.45<br>09  | 921.45<br>64  |               | 903.44<br>58  | <b>S</b> | 803.41<br>59  | 802.42<br>06  |              | <b>835.44<br/>21</b> | 818.41<br>55  | 817.43<br>15  | <b>7</b>  |
| <b>9</b>  | 120.08<br>08 | 1040.5<br>299 |               | 1022.5<br>193 | 1068.5<br>248 |               | 1050.5<br>142 | <b>F</b> | 656.34<br>74  |               |              | <b>748.41<br/>00</b> | 731.38<br>35  |               | <b>6</b>  |
| <b>10</b> | 87.055<br>3  | 1154.5<br>728 | 1137.5<br>463 | 1136.5<br>622 | 1182.5<br>677 | 1165.5<br>412 | 1164.5<br>572 | <b>N</b> | 542.30<br>45  | 541.30<br>93  |              | <b>601.34<br/>16</b> | 584.31<br>51  |               | <b>5</b>  |
| <b>11</b> | 101.07<br>09 | 1282.6<br>314 | 1265.6<br>048 | 1264.6<br>208 | 1310.6<br>263 | 1293.5<br>998 | 1292.6<br>157 | <b>Q</b> | 414.24<br>59  | 413.25<br>07  |              | <b>487.29<br/>87</b> | 470.27<br>22  |               | <b>4</b>  |
| <b>12</b> | 86.096<br>4  | 1395.7<br>155 | 1378.6<br>889 | 1377.7<br>049 | 1423.7<br>104 | 1406.6<br>838 | 1405.6<br>998 | <b>I</b> | 301.16<br>19  | 314.18<br>23  | 328.19<br>79 | <b>359.24<br/>01</b> | 342.21<br>36  |               | <b>3</b>  |
| <b>13</b> | 44.049<br>5  | 1466.7<br>526 | 1449.7<br>260 | 1448.7<br>420 | 1494.7<br>475 | 1477.7<br>209 | 1476.7<br>369 | <b>A</b> | 230.12<br>48  |               |              | <b>246.15<br/>61</b> | 229.12<br>95  |               | <b>2</b>  |
| <b>14</b> | 129.11<br>35 |               |               |               |               |               |               | <b>R</b> | 74.023<br>7   | 73.028<br>4   |              | <b>175.11<br/>90</b> | 158.09<br>24  |               | <b>1</b>  |

1279

MS/MS Fragmentation of QQTVGGVNYFFDVEVGR

Found in gi|118188, Cystatin-SN,

(1914.9723,1+)



Ions Score: 116

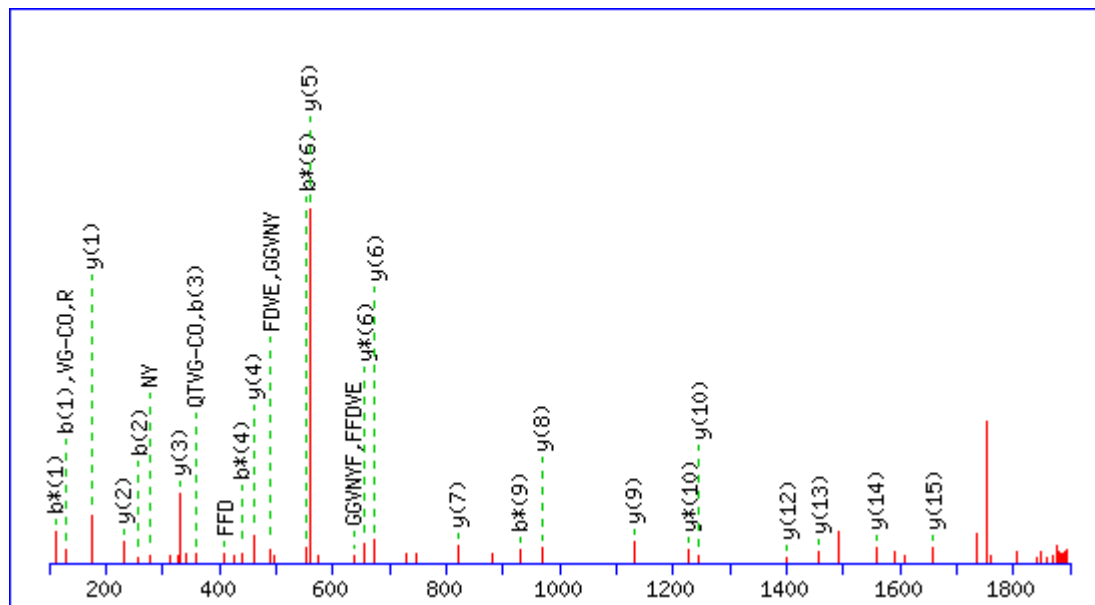

| # | Immon        | a            | a*           | a <sup>0</sup> | b            | b*           | b <sup>0</sup> | Seq. | v             | w             | w'            | y             | y*            | y <sup>0</sup> | #  |
|---|--------------|--------------|--------------|----------------|--------------|--------------|----------------|------|---------------|---------------|---------------|---------------|---------------|----------------|----|
| 1 | 101.07<br>09 | 101.07<br>09 | 84.044<br>4  |                | 129.06<br>59 | 112.03<br>93 |                | Q    |               |               |               |               |               |                | 17 |
| 2 | 101.07<br>09 | 229.12<br>95 | 212.10<br>30 |                | 257.12<br>44 | 240.09<br>79 |                | Q    | 1713.8<br>231 | 1712.8<br>279 |               | 1786.8<br>759 | 1769.8<br>493 | 1768.8<br>653  | 16 |
| 3 | 74.060<br>0  | 330.17<br>72 | 313.15<br>06 | 312.16<br>66   | 358.17<br>21 | 341.14<br>56 | 340.16<br>15   | T    | 1612.7<br>754 | 1625.7<br>958 | 1627.7<br>751 | 1658.8<br>173 | 1641.7<br>908 | 1640.8<br>067  | 15 |
| 4 | 72.080<br>8  | 429.24<br>56 | 412.21<br>91 | 411.23<br>50   | 457.24<br>05 | 440.21<br>40 | 439.23<br>00   | V    | 1513.7<br>070 | 1526.7<br>274 |               | 1557.7<br>696 | 1540.7<br>431 | 1539.7<br>591  | 14 |
| 5 | 30.033<br>8  | 486.26<br>71 | 469.24<br>05 | 468.25<br>65   | 514.26<br>20 | 497.23<br>54 | 496.25<br>14   | G    |               |               |               | 1458.7<br>012 | 1441.6<br>747 | 1440.6<br>906  | 13 |

|           |                            |               |               |               |               |                            |               |          |               |               |  |                             |                             |               |           |
|-----------|----------------------------|---------------|---------------|---------------|---------------|----------------------------|---------------|----------|---------------|---------------|--|-----------------------------|-----------------------------|---------------|-----------|
| <b>6</b>  | 30.033<br>8                | 543.28<br>85  | 526.26<br>20  | 525.27<br>80  | 571.28<br>35  | <b>554.25</b><br><b>69</b> | 553.27<br>29  | <b>G</b> |               |               |  | <b>1401.6</b><br><b>797</b> | 1384.6<br>532               | 1383.6<br>692 | <b>12</b> |
| <b>7</b>  | 72.080<br>8                | 642.35<br>70  | 625.33<br>04  | 624.34<br>64  | 670.35<br>19  | 653.32<br>53               | 652.34<br>13  | <b>V</b> | 1300.5<br>957 | 1313.6<br>161 |  | 1344.6<br>583               | 1327.6<br>317               | 1326.6<br>477 | <b>11</b> |
| <b>8</b>  | 87.055<br>3                | 756.39<br>99  | 739.37<br>33  | 738.38<br>93  | 784.39<br>48  | 767.36<br>82               | 766.38<br>42  | <b>N</b> | 1186.5<br>528 | 1185.5<br>575 |  | <b>1245.5</b><br><b>899</b> | <b>1228.5</b><br><b>633</b> | 1227.5<br>793 | <b>10</b> |
| <b>9</b>  | 136.07<br>57               | 919.46<br>32  | 902.43<br>67  | 901.45<br>26  | 947.45<br>81  | <b>930.43</b><br><b>16</b> | 929.44<br>76  | <b>Y</b> | 1023.4<br>894 |               |  | <b>1131.5</b><br><b>469</b> | 1114.5<br>204               | 1113.5<br>364 | <b>9</b>  |
| <b>10</b> | 120.08<br>08               | 1066.5<br>316 | 1049.5<br>051 | 1048.5<br>211 | 1094.5<br>265 | 1077.5<br>000              | 1076.5<br>160 | <b>F</b> | 876.42<br>10  |               |  | <b>968.48</b><br><b>36</b>  | 951.45<br>71                | 950.47<br>30  | <b>8</b>  |
| <b>11</b> | 120.08<br>08               | 1213.6<br>000 | 1196.5<br>735 | 1195.5<br>895 | 1241.5<br>950 | 1224.5<br>684              | 1223.5<br>844 | <b>F</b> | 729.35<br>26  |               |  | <b>821.41</b><br><b>52</b>  | 804.38<br>86                | 803.40<br>46  | <b>7</b>  |
| <b>12</b> | 88.039<br>3                | 1328.6<br>270 | 1311.6<br>004 | 1310.6<br>164 | 1356.6<br>219 | 1339.5<br>953              | 1338.6<br>113 | <b>D</b> | 614.32<br>57  | 613.33<br>04  |  | <b>674.34</b><br><b>68</b>  | <b>657.32</b><br><b>02</b>  | 656.33<br>62  | <b>6</b>  |
| <b>13</b> | 72.080<br>8                | 1427.6<br>954 | 1410.6<br>688 | 1409.6<br>848 | 1455.6<br>903 | 1438.6<br>638              | 1437.6<br>797 | <b>V</b> | 515.25<br>72  | 528.27<br>76  |  | <b>559.31</b><br><b>98</b>  | 542.29<br>33                | 541.30<br>93  | <b>5</b>  |
| <b>14</b> | 102.05<br>50               | 1556.7<br>380 | 1539.7<br>114 | 1538.7<br>274 | 1584.7<br>329 | 1567.7<br>064              | 1566.7<br>223 | <b>E</b> | 386.21<br>46  | 385.21<br>94  |  | <b>460.25</b><br><b>14</b>  | 443.22<br>49                | 442.24<br>09  | <b>4</b>  |
| <b>15</b> | 72.080<br>8                | 1655.8<br>064 | 1638.7<br>799 | 1637.7<br>958 | 1683.8<br>013 | 1666.7<br>748              | 1665.7<br>908 | <b>V</b> | 287.14<br>62  | 300.16<br>66  |  | <b>331.20</b><br><b>88</b>  | 314.18<br>23                |               | <b>3</b>  |
| <b>16</b> | 30.033<br>8                | 1712.8<br>279 | 1695.8<br>013 | 1694.8<br>173 | 1740.8<br>228 | 1723.7<br>962              | 1722.8<br>122 | <b>G</b> |               |               |  | <b>232.14</b><br><b>04</b>  | 215.11<br>39                |               | <b>2</b>  |
| <b>17</b> | <b>129.11</b><br><b>35</b> |               |               |               |               |                            |               | <b>R</b> | 74.023<br>7   | 73.028<br>4   |  | <b>175.11</b><br><b>90</b>  | 158.09<br>24                |               | <b>1</b>  |

MS/MS Fragmentation of APVPTGEVYFADSFDR

Found in gi|7709904, calnexin,

(1770.7988,1+)

Ions Score: 107

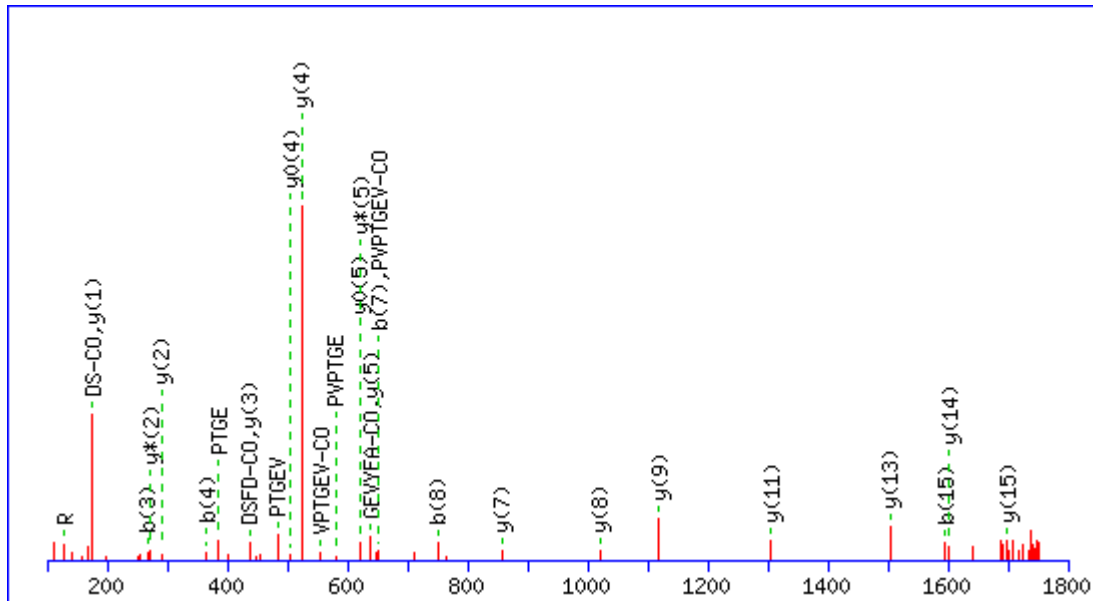

| # | Immon.  | a            | a <sup>0</sup> | b            | b <sup>0</sup> | Seq. | v             | w             | w' | y             | y*            | y <sup>0</sup> | #  |
|---|---------|--------------|----------------|--------------|----------------|------|---------------|---------------|----|---------------|---------------|----------------|----|
| 1 | 44.0495 | 44.0495      |                | 72.0444      |                | A    |               |               |    |               |               |                | 16 |
| 2 | 70.0651 | 141.102<br>2 |                | 169.097<br>2 |                | P    | 1657.74<br>93 | 1656.75<br>40 |    | 1699.79<br>62 | 1682.76<br>97 | 1681.78<br>57  | 15 |
| 3 | 72.0808 | 240.170<br>7 |                | 268.165<br>6 |                | V    | 1558.68<br>09 | 1571.70<br>13 |    | 1602.74<br>35 | 1585.71<br>69 | 1584.73<br>29  | 14 |
| 4 | 70.0651 | 337.223<br>4 |                | 365.218<br>3 |                | P    | 1461.62<br>81 | 1460.63<br>29 |    | 1503.67<br>51 | 1486.64<br>85 | 1485.66<br>45  | 13 |

|           |                            |               |               |                             |               |          |               |               |               |                             |                            |                            |           |
|-----------|----------------------------|---------------|---------------|-----------------------------|---------------|----------|---------------|---------------|---------------|-----------------------------|----------------------------|----------------------------|-----------|
| <b>5</b>  | 74.0600                    | 438.271<br>1  | 420.260<br>5  | 466.266<br>0                | 448.255<br>4  | <b>T</b> | 1360.58<br>04 | 1373.60<br>08 | 1375.58<br>01 | 1406.62<br>23               | 1389.59<br>57              | 1388.61<br>17              | <b>12</b> |
| <b>6</b>  | 30.0338                    | 495.292<br>6  | 477.282<br>0  | 523.287<br>5                | 505.276<br>9  | <b>G</b> |               |               |               | <b>1305.57</b><br><b>46</b> | 1288.54<br>81              | 1287.56<br>40              | <b>11</b> |
| <b>7</b>  | 102.055<br>0               | 624.335<br>2  | 606.324<br>6  | <b>652.330</b><br><b>1</b>  | 634.319<br>5  | <b>E</b> | 1174.51<br>64 | 1173.52<br>11 |               | 1248.55<br>31               | 1231.52<br>66              | 1230.54<br>26              | <b>10</b> |
| <b>8</b>  | 72.0808                    | 723.403<br>6  | 705.393<br>0  | <b>751.398</b><br><b>5</b>  | 733.387<br>9  | <b>V</b> | 1075.44<br>80 | 1088.46<br>84 |               | <b>1119.51</b><br><b>06</b> | 1102.48<br>40              | 1101.50<br>00              | <b>9</b>  |
| <b>9</b>  | 136.075<br>7               | 886.466<br>9  | 868.456<br>3  | 914.461<br>8                | 896.451<br>2  | <b>Y</b> | 912.384<br>6  |               |               | <b>1020.44</b><br><b>21</b> | 1003.41<br>56              | 1002.43<br>16              | <b>8</b>  |
| <b>10</b> | 120.080<br>8               | 1033.53<br>53 | 1015.52<br>47 | 1061.53<br>02               | 1043.51<br>97 | <b>F</b> | 765.316<br>2  |               |               | <b>857.378</b><br><b>8</b>  | 840.352<br>3               | 839.368<br>2               | <b>7</b>  |
| <b>11</b> | 44.0495                    | 1104.57<br>24 | 1086.56<br>19 | 1132.56<br>73               | 1114.55<br>68 | <b>A</b> | 694.279<br>1  |               |               | 710.310<br>4                | 693.283<br>8               | 692.299<br>8               | <b>6</b>  |
| <b>12</b> | 88.0393                    | 1219.59<br>94 | 1201.58<br>88 | 1247.59<br>43               | 1229.58<br>37 | <b>D</b> | 579.252<br>2  | 578.256<br>9  |               | <b>639.273</b><br><b>3</b>  | <b>622.246</b><br><b>7</b> | <b>621.262</b><br><b>7</b> | <b>5</b>  |
| <b>13</b> | 60.0444                    | 1306.63<br>14 | 1288.62<br>08 | 1334.62<br>63               | 1316.61<br>57 | <b>S</b> | 492.220<br>1  | 491.224<br>9  |               | <b>524.246</b><br><b>3</b>  | 507.219<br>8               | <b>506.235</b><br><b>8</b> | <b>4</b>  |
| <b>14</b> | 120.080<br>8               | 1453.69<br>98 | 1435.68<br>92 | 1481.69<br>47               | 1463.68<br>42 | <b>F</b> | 345.151<br>7  |               |               | <b>437.214</b><br><b>3</b>  | 420.187<br>8               | 419.203<br>7               | <b>3</b>  |
| <b>15</b> | 88.0393                    | 1568.72<br>68 | 1550.71<br>62 | <b>1596.72</b><br><b>17</b> | 1578.71<br>11 | <b>D</b> | 230.124<br>8  | 229.129<br>5  |               | <b>290.145</b><br><b>9</b>  | <b>273.119</b><br><b>3</b> | 272.135<br>3               | <b>2</b>  |
| <b>16</b> | <b>129.113</b><br><b>5</b> |               |               |                             |               | <b>R</b> | 74.0237       | 73.0284       |               | <b>175.119</b><br><b>0</b>  | 158.092<br>4               |                            |           |

# MS/MS Fragmentation of ADSFYIIESGGEVSILIR

Found in gi|4758958, cAMP-dependent protein kinase type II-alpha regulatory subunit,

(1911.9822,1+)

Ions Score: 60

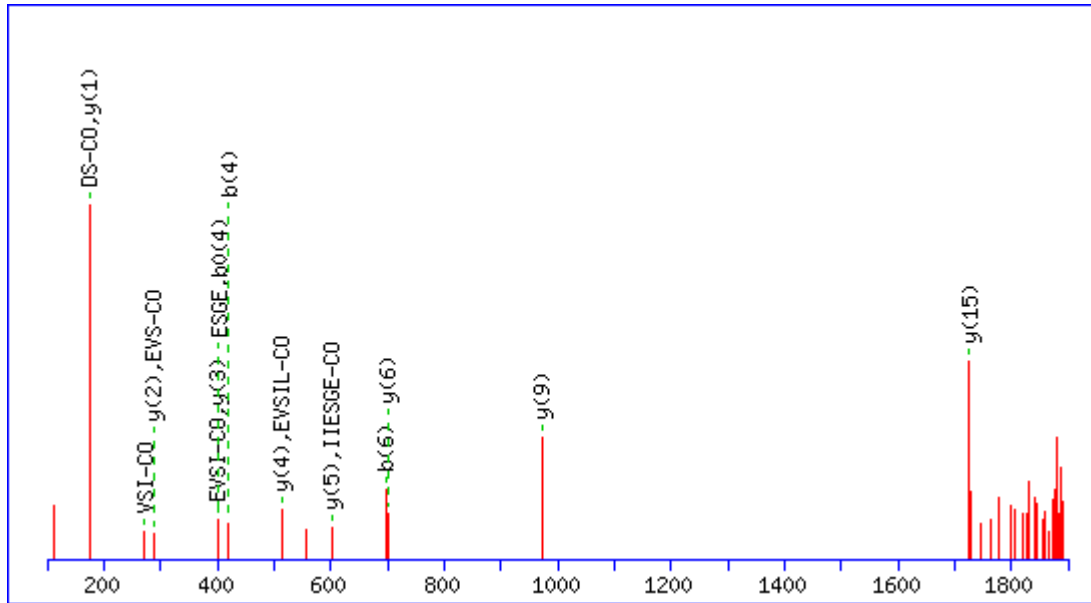

| # | Immon.  | a            | a <sup>0</sup> | b            | b <sup>0</sup> | Seq. | v             | w             | w' | y                           | y*            | y <sup>0</sup> | #  |
|---|---------|--------------|----------------|--------------|----------------|------|---------------|---------------|----|-----------------------------|---------------|----------------|----|
| 1 | 44.0495 | 44.0495      |                | 72.0444      |                | A    |               |               |    |                             |               |                | 17 |
| 2 | 88.0393 | 159.076<br>4 | 141.065<br>9   | 187.071<br>3 | 169.060<br>8   | D    | 1780.94<br>80 | 1779.95<br>27 |    | 1840.96<br>91               | 1823.94<br>26 | 1822.95<br>85  | 16 |
| 3 | 60.0444 | 246.108<br>4 | 228.097<br>9   | 274.103<br>4 | 256.092<br>8   | S    | 1693.91<br>59 | 1692.92<br>07 |    | <b>1725.94</b><br><b>22</b> | 1708.91<br>56 | 1707.93<br>16  | 15 |

|           |              |               |               |                            |                            |          |               |               |               |                            |               |               |           |
|-----------|--------------|---------------|---------------|----------------------------|----------------------------|----------|---------------|---------------|---------------|----------------------------|---------------|---------------|-----------|
| <b>4</b>  | 120.080<br>8 | 393.176<br>9  | 375.166<br>3  | <b>421.171</b><br><b>8</b> | <b>403.161</b><br><b>2</b> | <b>F</b> | 1546.84<br>75 |               |               | 1638.91<br>01              | 1621.88<br>36 | 1620.89<br>96 | <b>14</b> |
| <b>5</b>  | 136.075<br>7 | 556.240<br>2  | 538.229<br>6  | 584.235<br>1               | 566.224<br>5               | <b>Y</b> | 1383.78<br>42 |               |               | 1491.84<br>17              | 1474.81<br>52 | 1473.83<br>12 | <b>13</b> |
| <b>6</b>  | 86.0964      | 669.324<br>3  | 651.313<br>7  | <b>697.319</b><br><b>2</b> | 679.308<br>6               | <b>I</b> | 1270.70<br>01 | 1283.72<br>05 | 1297.73<br>62 | 1328.77<br>84              | 1311.75<br>18 | 1310.76<br>78 | <b>12</b> |
| <b>7</b>  | 86.0964      | 782.408<br>3  | 764.397<br>8  | 810.403<br>2               | 792.392<br>7               | <b>I</b> | 1157.61<br>61 | 1170.63<br>65 | 1184.65<br>21 | 1215.69<br>43              | 1198.66<br>78 | 1197.68<br>38 | <b>11</b> |
| <b>8</b>  | 102.055<br>0 | 911.450<br>9  | 893.440<br>3  | 939.445<br>8               | 921.435<br>3               | <b>E</b> | 1028.57<br>35 | 1027.57<br>82 |               | 1102.61<br>03              | 1085.58<br>37 | 1084.59<br>97 | <b>10</b> |
| <b>9</b>  | 60.0444      | 998.482<br>9  | 980.472<br>4  | 1026.47<br>79              | 1008.46<br>73              | <b>S</b> | 941.541<br>5  | 940.546<br>2  |               | <b>973.567</b><br><b>7</b> | 956.541<br>1  | 955.557<br>1  | <b>9</b>  |
| <b>10</b> | 30.0338      | 1055.50<br>44 | 1037.49<br>38 | 1083.49<br>93              | 1065.48<br>88              | <b>G</b> |               |               |               | 886.535<br>6               | 869.509<br>1  | 868.525<br>1  | <b>8</b>  |
| <b>11</b> | 102.055<br>0 | 1184.54<br>70 | 1166.53<br>64 | 1212.54<br>19              | 1194.53<br>13              | <b>E</b> | 755.477<br>4  | 754.482<br>2  |               | 829.514<br>2               | 812.487<br>6  | 811.503<br>6  | <b>7</b>  |
| <b>12</b> | 72.0808      | 1283.61<br>54 | 1265.60<br>48 | 1311.61<br>03              | 1293.59<br>98              | <b>V</b> | 656.409<br>0  | 669.429<br>4  |               | <b>700.471</b><br><b>6</b> | 683.445<br>0  | 682.461<br>0  | <b>6</b>  |
| <b>13</b> | 60.0444      | 1370.64<br>74 | 1352.63<br>69 | 1398.64<br>24              | 1380.63<br>18              | <b>S</b> | 569.377<br>0  | 568.381<br>7  |               | <b>601.403</b><br><b>2</b> | 584.376<br>6  | 583.392<br>6  | <b>5</b>  |
| <b>14</b> | 86.0964      | 1483.73<br>15 | 1465.72<br>09 | 1511.72<br>64              | 1493.71<br>59              | <b>I</b> | 456.292<br>9  | 469.313<br>3  | 483.328<br>9  | <b>514.371</b><br><b>1</b> | 497.344<br>6  |               | <b>4</b>  |
| <b>15</b> | 86.0964      | 1596.81<br>56 | 1578.80<br>50 | 1624.81<br>05              | 1606.79<br>99              | <b>L</b> | 343.208<br>8  | 342.213<br>6  |               | <b>401.287</b><br><b>1</b> | 384.260<br>5  |               | <b>3</b>  |
| <b>16</b> | 86.0964      | 1709.89<br>96 | 1691.88<br>91 | 1737.89<br>45              | 1719.88<br>40              | <b>I</b> | 230.124<br>8  | 243.145<br>2  | 257.160<br>8  | <b>288.203</b><br><b>0</b> | 271.176<br>5  |               | <b>2</b>  |

|    |          |  |  |  |  |   |         |         |  |          |          |  |   |
|----|----------|--|--|--|--|---|---------|---------|--|----------|----------|--|---|
| 17 | 129.1135 |  |  |  |  | R | 74.0237 | 73.0284 |  | 175.1190 | 158.0924 |  | 1 |
|----|----------|--|--|--|--|---|---------|---------|--|----------|----------|--|---|

1282

MS/MS Fragmentation of GVIYIGSSGFDSIPADLGVIYTR

Found in gi|4929567, CGI-49 protein,

(2400.2207,1+)

Ions Score: 65

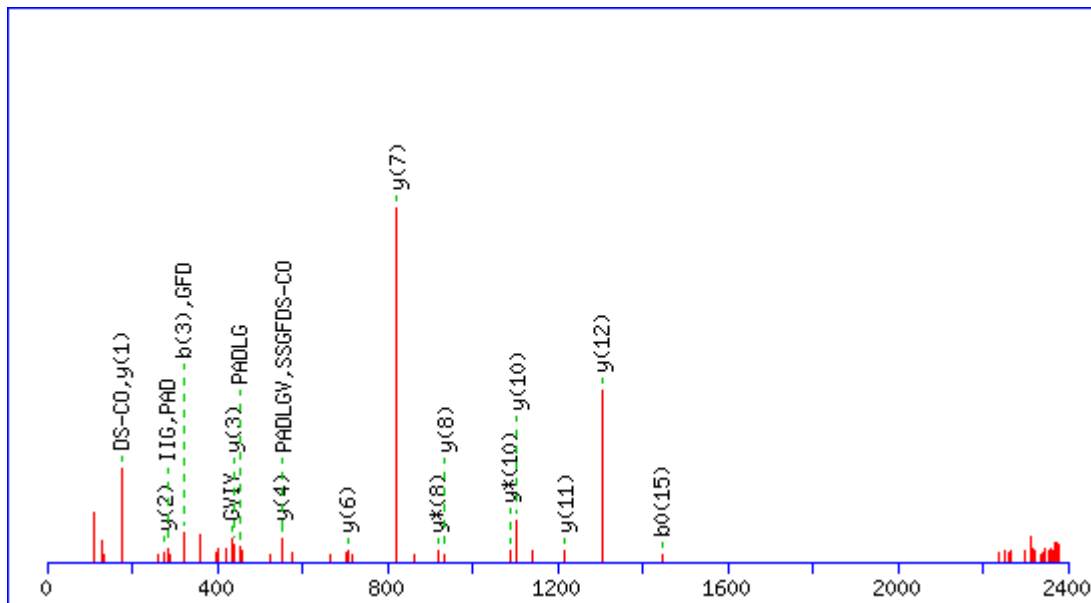

| # | Immon. | a | a <sup>0</sup> | b | b <sup>0</sup> | Seq. | v | w | w' | y | y* | y <sup>0</sup> | # |
|---|--------|---|----------------|---|----------------|------|---|---|----|---|----|----------------|---|
|---|--------|---|----------------|---|----------------|------|---|---|----|---|----|----------------|---|

|           |              |               |               |                            |               |          |               |               |               |                             |                |               |           |
|-----------|--------------|---------------|---------------|----------------------------|---------------|----------|---------------|---------------|---------------|-----------------------------|----------------|---------------|-----------|
| <b>1</b>  | 30.0338      | 30.0338       |               | 58.0287                    |               | <b>G</b> |               |               |               |                             |                |               | <b>23</b> |
| <b>2</b>  | 72.0808      | 129.102<br>2  |               | 157.097<br>2               |               | <b>V</b> | 2299.16<br>05 | 2312.18<br>09 |               | 2343.22<br>31               | 2326.19<br>65  | 2325.21<br>25 | <b>22</b> |
| <b>3</b>  | 136.075<br>7 | 292.165<br>6  |               | <b>320.160</b><br><b>5</b> |               | <b>Y</b> | 2136.09<br>72 |               |               | 2244.15<br>47               | 2227.12<br>81  | 2226.14<br>41 | <b>21</b> |
| <b>4</b>  | 86.0964      | 405.249<br>6  |               | <b>433.244</b><br><b>5</b> |               | <b>I</b> | 2023.01<br>31 | 2036.03<br>35 | 2050.04<br>91 | 2081.09<br>13               | 2064.06<br>48  | 2063.08<br>08 | <b>20</b> |
| <b>5</b>  | 86.0964      | 518.333<br>7  |               | 546.328<br>6               |               | <b>I</b> | 1909.92<br>90 | 1922.94<br>94 | 1936.96<br>51 | 1968.00<br>73               | 1950.98<br>07  | 1949.99<br>67 | <b>19</b> |
| <b>6</b>  | 30.0338      | 575.355<br>2  |               | 603.350<br>1               |               | <b>G</b> |               |               |               | 1854.92<br>32               | 1837.89<br>67  | 1836.91<br>27 | <b>18</b> |
| <b>7</b>  | 60.0444      | 662.387<br>2  | 644.376<br>6  | 690.382<br>1               | 672.371<br>5  | <b>S</b> | 1765.87<br>55 | 1764.88<br>03 |               | 1797.90<br>18               | 1780.87<br>52  | 1779.89<br>12 | <b>17</b> |
| <b>8</b>  | 60.0444      | 749.419<br>2  | 731.408<br>7  | 777.414<br>1               | 759.403<br>6  | <b>S</b> | 1678.84<br>35 | 1677.84<br>83 |               | 1710.86<br>97               | 1693.84<br>32  | 1692.85<br>92 | <b>16</b> |
| <b>9</b>  | 30.0338      | 806.440<br>7  | 788.430<br>1  | 834.435<br>6               | 816.425<br>0  | <b>G</b> |               |               |               | 1623.83<br>77               | 1606.81<br>12  | 1605.82<br>71 | <b>15</b> |
| <b>10</b> | 120.080<br>8 | 953.509<br>1  | 935.498<br>5  | 981.504<br>0               | 963.493<br>4  | <b>F</b> | 1474.75<br>36 |               |               | 1566.81<br>62               | 1549.78<br>97  | 1548.80<br>57 | <b>14</b> |
| <b>11</b> | 88.0393      | 1068.53<br>60 | 1050.52<br>55 | 1096.53<br>10              | 1078.52<br>04 | <b>D</b> | 1359.72<br>67 | 1358.73<br>14 |               | 1419.74<br>78               | 1402.72<br>13  | 1401.73<br>73 | <b>13</b> |
| <b>12</b> | 60.0444      | 1155.56<br>81 | 1137.55<br>75 | 1183.56<br>30              | 1165.55<br>24 | <b>S</b> | 1272.69<br>47 | 1271.69<br>94 |               | <b>1304.72</b><br><b>09</b> | 1287.69<br>43  | 1286.71<br>03 | <b>12</b> |
| <b>13</b> | 86.0964      | 1268.65<br>21 | 1250.64<br>16 | 1296.64<br>70              | 1278.63<br>65 | <b>I</b> | 1159.61<br>06 | 1172.63<br>10 | 1186.64<br>67 | <b>1217.68</b><br><b>89</b> | 1200.66<br>23  | 1199.67<br>83 | <b>11</b> |
| <b>14</b> | 70.0651      | 1365.70       | 1347.69       | 1393.69                    | 1375.68       | <b>P</b> | 1062.55       | 1061.56       |               | <b>1104.60</b>              | <b>1087.57</b> | 1086.59       | <b>10</b> |



|           |              |               |               |               |                             |          |              |              |              |                            |                            |              |          |
|-----------|--------------|---------------|---------------|---------------|-----------------------------|----------|--------------|--------------|--------------|----------------------------|----------------------------|--------------|----------|
|           |              | 49            | 43            | 98            | 92                          |          | 78           | 26           |              | <b>48</b>                  | <b>82</b>                  | 42           |          |
| <b>15</b> | 44.0495      | 1436.74<br>20 | 1418.73<br>14 | 1464.73<br>69 | <b>1446.72</b><br><b>64</b> | <b>A</b> | 991.520<br>7 |              |              | 1007.55<br>20              | 990.525<br>5               | 989.541<br>5 | <b>9</b> |
| <b>16</b> | 88.0393      | 1551.76<br>90 | 1533.75<br>84 | 1579.76<br>39 | 1561.75<br>33               | <b>D</b> | 876.493<br>8 | 875.498<br>5 |              | <b>936.514</b><br><b>9</b> | <b>919.488</b><br><b>4</b> | 918.504<br>3 | <b>8</b> |
| <b>17</b> | 86.0964      | 1664.85<br>30 | 1646.84<br>24 | 1692.84<br>79 | 1674.83<br>74               | <b>L</b> | 763.409<br>7 | 762.414<br>5 |              | <b>821.488</b><br><b>0</b> | 804.461<br>4               | 803.477<br>4 | <b>7</b> |
| <b>18</b> | 30.0338      | 1721.87<br>45 | 1703.86<br>39 | 1749.86<br>94 | 1731.85<br>88               | <b>G</b> |              |              |              | <b>708.403</b><br><b>9</b> | 691.377<br>4               | 690.393<br>3 | <b>6</b> |
| <b>19</b> | 72.0808      | 1820.94<br>29 | 1802.93<br>23 | 1848.93<br>78 | 1830.92<br>72               | <b>V</b> | 607.319<br>8 | 620.340<br>2 |              | 651.382<br>4               | 634.355<br>9               | 633.371<br>9 | <b>5</b> |
| <b>20</b> | 86.0964      | 1934.02<br>70 | 1916.01<br>64 | 1962.02<br>19 | 1944.01<br>13               | <b>I</b> | 494.235<br>8 | 507.256<br>2 | 521.271<br>8 | <b>552.314</b><br><b>0</b> | 535.287<br>5               | 534.303<br>5 | <b>4</b> |
| <b>21</b> | 136.075<br>7 | 2097.09<br>03 | 2079.07<br>97 | 2125.08<br>52 | 2107.07<br>46               | <b>Y</b> | 331.172<br>4 |              |              | <b>439.230</b><br><b>0</b> | 422.203<br>4               | 421.219<br>4 | <b>3</b> |
| <b>22</b> | 74.0600      | 2198.13<br>80 | 2180.12<br>74 | 2226.13<br>29 | 2208.12<br>23               | <b>T</b> | 230.124<br>8 | 243.145<br>2 | 245.124<br>4 | <b>276.166</b><br><b>6</b> | 259.140<br>1               | 258.156<br>1 | <b>2</b> |
| <b>23</b> | 129.113<br>5 |               |               |               |                             | <b>R</b> | 74.0237      | 73.0284      |              | <b>175.119</b><br><b>0</b> | 158.092<br>4               |              | <b>1</b> |

1283

MS/MS Fragmentation of TAPAVVYIEILDR

Found in gi|21466051, Chain A, Crystal Structure Of The Mitochondrial Serine Protease Htra2,

(1459.7542,1+)

Ions Score: 39

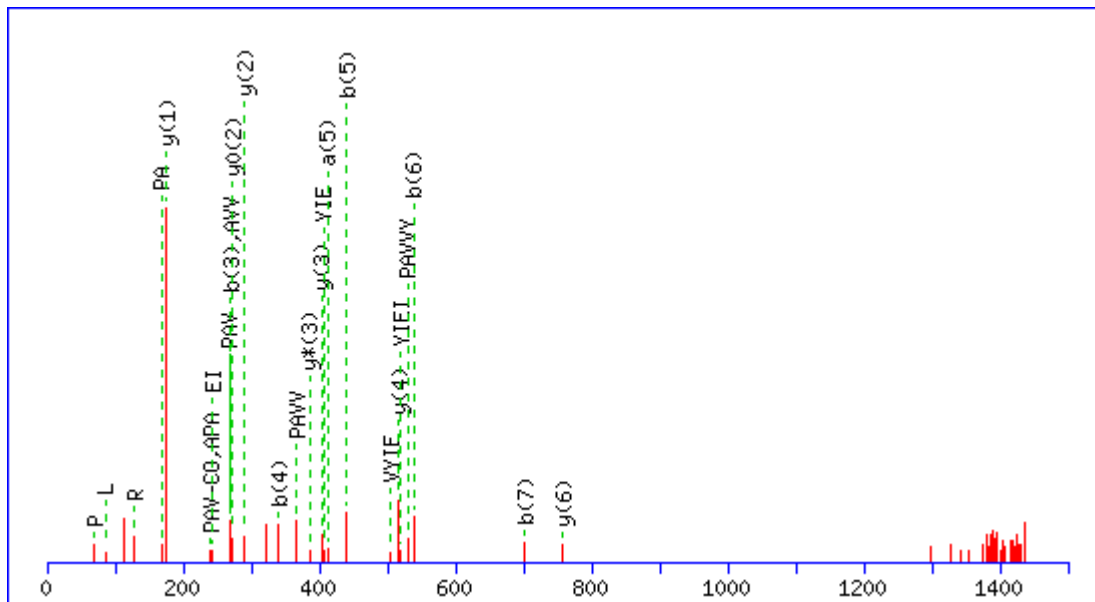

| # | Immon.         | a                   | a <sup>0</sup> | b                   | b <sup>0</sup> | Seq. | v             | w             | w' | y             | y*            | y <sup>0</sup> | #  |
|---|----------------|---------------------|----------------|---------------------|----------------|------|---------------|---------------|----|---------------|---------------|----------------|----|
| 1 | 74.0600        | 74.0600             | 56.0495        | 102.055<br>0        | 84.0444        | T    |               |               |    |               |               |                | 13 |
| 2 | 44.0495        | 145.097<br>2        | 127.086<br>6   | 173.092<br>1        | 155.081<br>5   | A    | 1342.73<br>65 |               |    | 1358.76<br>78 | 1341.74<br>13 | 1340.75<br>73  | 12 |
| 3 | <b>70.0651</b> | 242.149<br>9        | 224.139<br>4   | <b>270.144</b><br>8 | 252.134<br>3   | P    | 1245.68<br>38 | 1244.68<br>85 |    | 1287.73<br>07 | 1270.70<br>42 | 1269.72<br>01  | 11 |
| 4 | 44.0495        | 313.187<br>0        | 295.176<br>5   | <b>341.181</b><br>9 | 323.171<br>4   | A    | 1174.64<br>67 |               |    | 1190.67<br>80 | 1173.65<br>14 | 1172.66<br>74  | 10 |
| 5 | 72.0808        | <b>412.255</b><br>4 | 394.244<br>9   | <b>440.250</b><br>4 | 422.239<br>8   | V    | 1075.57<br>82 | 1088.59<br>86 |    | 1119.64<br>08 | 1102.61<br>43 | 1101.63<br>03  | 9  |
| 6 | 72.0808        | 511.323<br>9        | 493.313<br>3   | <b>539.318</b><br>8 | 521.308<br>2   | V    | 976.509<br>8  | 989.530<br>2  |    | 1020.57<br>24 | 1003.54<br>59 | 1002.56<br>19  | 8  |

|    |                            |               |               |                            |               |   |              |              |              |                            |                            |                            |   |
|----|----------------------------|---------------|---------------|----------------------------|---------------|---|--------------|--------------|--------------|----------------------------|----------------------------|----------------------------|---|
| 7  | 136.075<br>7               | 674.387<br>2  | 656.376<br>6  | <b>702.382</b><br><b>1</b> | 684.371<br>5  | Y | 813.446<br>5 |              |              | 921.504<br>0               | 904.477<br>5               | 903.493<br>4               | 7 |
| 8  | <b>86.0964</b>             | 787.471<br>3  | 769.460<br>7  | 815.466<br>2               | 797.455<br>6  | I | 700.362<br>4 | 713.382<br>8 | 727.398<br>5 | <b>758.440</b><br><b>7</b> | 741.414<br>1               | 740.430<br>1               | 6 |
| 9  | 102.055<br>0               | 916.513<br>8  | 898.503<br>3  | 944.508<br>8               | 926.498<br>2  | E | 571.319<br>8 | 570.324<br>6 |              | 645.356<br>6               | 628.330<br>1               | 627.346<br>1               | 5 |
| 10 | <b>86.0964</b>             | 1029.59<br>79 | 1011.58<br>73 | 1057.59<br>28              | 1039.58<br>23 | I | 458.235<br>8 | 471.256<br>2 | 485.271<br>8 | <b>516.314</b><br><b>0</b> | 499.287<br>5               | 498.303<br>5               | 4 |
| 11 | <b>86.0964</b>             | 1142.68<br>20 | 1124.67<br>14 | 1170.67<br>69              | 1152.66<br>63 | L | 345.151<br>7 | 344.156<br>5 |              | <b>403.230</b><br><b>0</b> | <b>386.203</b><br><b>4</b> | 385.219<br>4               | 3 |
| 12 | 88.0393                    | 1257.70<br>89 | 1239.69<br>84 | 1285.70<br>38              | 1267.69<br>33 | D | 230.124<br>8 | 229.129<br>5 |              | <b>290.145</b><br><b>9</b> | 273.119<br>3               | <b>272.135</b><br><b>3</b> | 2 |
| 13 | <b>129.113</b><br><b>5</b> |               |               |                            |               | R | 74.0237      | 73.0284      |              | <b>175.119</b><br><b>0</b> | 158.092<br>4               |                            | 1 |

1284

MS/MS Fragmentation of YDGSTIVPGEQGAEYQHFIQQCTDDVR

Found in gi|52696274, Chain A, Nmr Structure Of Human Coactosin-Like Protein,

(3113.4163,1+)

Ions Score: 68

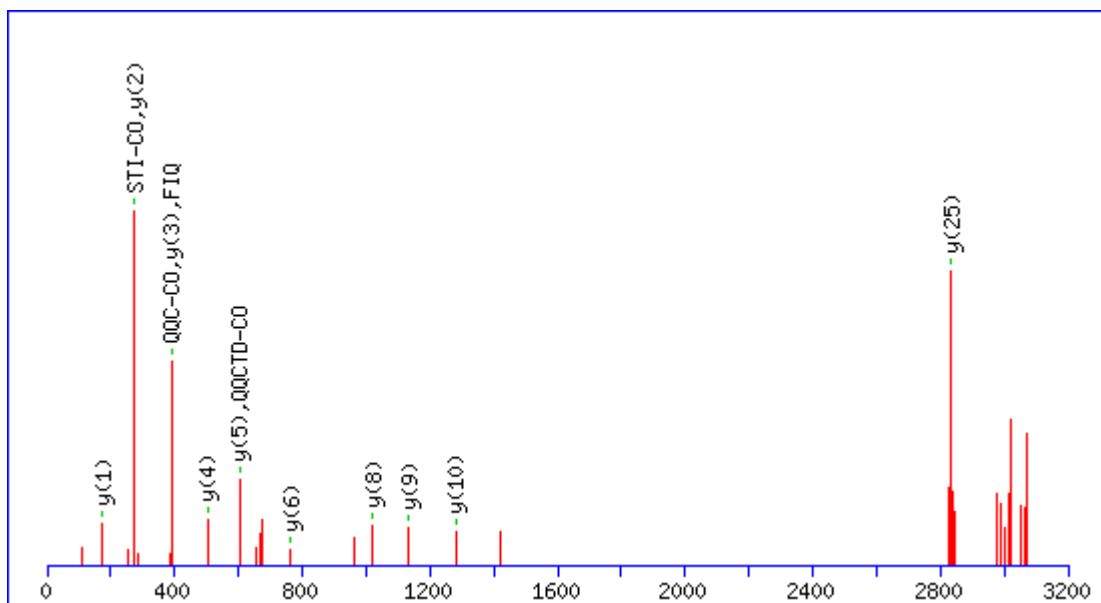

| # | Immon        | a            | a* | a <sup>0</sup> | b            | b* | b <sup>0</sup> | Seq. | v             | w             | w'            | y             | y*            | y <sup>0</sup> | #  |
|---|--------------|--------------|----|----------------|--------------|----|----------------|------|---------------|---------------|---------------|---------------|---------------|----------------|----|
| 1 | 136.07<br>57 | 136.07<br>57 |    |                | 164.07<br>06 |    |                | Y    |               |               |               |               |               |                | 27 |
| 2 | 88.039<br>3  | 251.10<br>26 |    | 233.09<br>21   | 279.09<br>75 |    | 261.08<br>70   | D    | 2890.3<br>061 | 2889.3<br>108 |               | 2950.3<br>272 | 2933.3<br>006 | 2932.3<br>166  | 26 |
| 3 | 30.033<br>8  | 308.12<br>41 |    | 290.11<br>35   | 336.11<br>90 |    | 318.10<br>84   | G    |               |               |               | 2835.3<br>003 | 2818.2<br>737 | 2817.2<br>897  | 25 |
| 4 | 60.044<br>4  | 395.15<br>61 |    | 377.14<br>56   | 423.15<br>10 |    | 405.14<br>05   | S    | 2746.2<br>526 | 2745.2<br>573 |               | 2778.2<br>788 | 2761.2<br>522 | 2760.2<br>682  | 24 |
| 5 | 74.060<br>0  | 496.20<br>38 |    | 478.19<br>32   | 524.19<br>87 |    | 506.18<br>82   | T    | 2645.2<br>049 | 2658.2<br>253 | 2660.2<br>046 | 2691.2<br>468 | 2674.2<br>202 | 2673.2<br>362  | 23 |
| 6 | 86.096<br>4  | 609.28<br>79 |    | 591.27<br>73   | 637.28<br>28 |    | 619.27<br>22   | I    | 2532.1<br>208 | 2545.1<br>412 | 2559.1<br>569 | 2590.1<br>991 | 2573.1<br>725 | 2572.1<br>885  | 22 |
| 7 | 72.080       | 708.35       |    | 690.34         | 736.35       |    | 718.34         | V    | 2433.0        | 2446.0        |               | 2477.1        | 2460.0        | 2459.1         | 21 |

|           |              |               |               |               |               |               |               |          |               |               |               |                             |               |               |           |
|-----------|--------------|---------------|---------------|---------------|---------------|---------------|---------------|----------|---------------|---------------|---------------|-----------------------------|---------------|---------------|-----------|
|           | 8            | 63            |               | 57            | 12            |               | 06            |          | 524           | 728           |               | 150                         | 885           | 045           |           |
| <b>8</b>  | 70.065<br>1  | 805.40<br>90  |               | 787.39<br>85  | 833.40<br>40  |               | 815.39<br>34  | <b>P</b> | 2335.9<br>997 | 2335.0<br>044 |               | 2378.0<br>466               | 2361.0<br>201 | 2360.0<br>360 | <b>20</b> |
| <b>9</b>  | 30.033<br>8  | 862.43<br>05  |               | 844.41<br>99  | 890.42<br>54  |               | 872.41<br>49  | <b>G</b> |               |               |               | 2280.9<br>938               | 2263.9<br>673 | 2262.9<br>833 | <b>19</b> |
| <b>10</b> | 102.05<br>50 | 991.47<br>31  |               | 973.46<br>25  | 1019.4<br>680 |               | 1001.4<br>575 | <b>E</b> | 2149.9<br>356 | 2148.9<br>403 |               | 2223.9<br>724               | 2206.9<br>458 | 2205.9<br>618 | <b>18</b> |
| <b>11</b> | 101.07<br>09 | 1119.5<br>317 | 1102.5<br>051 | 1101.5<br>211 | 1147.5<br>266 | 1130.5<br>000 | 1129.5<br>160 | <b>Q</b> | 2021.8<br>770 | 2020.8<br>818 |               | 2094.9<br>298               | 2077.9<br>032 | 2076.9<br>192 | <b>17</b> |
| <b>12</b> | 30.033<br>8  | 1176.5<br>531 | 1159.5<br>266 | 1158.5<br>426 | 1204.5<br>481 | 1187.5<br>215 | 1186.5<br>375 | <b>G</b> |               |               |               | 1966.8<br>712               | 1949.8<br>447 | 1948.8<br>606 | <b>16</b> |
| <b>13</b> | 44.049<br>5  | 1247.5<br>903 | 1230.5<br>637 | 1229.5<br>797 | 1275.5<br>852 | 1258.5<br>586 | 1257.5<br>746 | <b>A</b> | 1893.8<br>184 |               |               | 1909.8<br>497               | 1892.8<br>232 | 1891.8<br>392 | <b>15</b> |
| <b>14</b> | 102.05<br>50 | 1376.6<br>329 | 1359.6<br>063 | 1358.6<br>223 | 1404.6<br>278 | 1387.6<br>012 | 1386.6<br>172 | <b>E</b> | 1764.7<br>758 | 1763.7<br>806 |               | 1838.8<br>126               | 1821.7<br>861 | 1820.8<br>021 | <b>14</b> |
| <b>15</b> | 136.07<br>57 | 1539.6<br>962 | 1522.6<br>696 | 1521.6<br>856 | 1567.6<br>911 | 1550.6<br>645 | 1549.6<br>805 | <b>Y</b> | 1601.7<br>125 |               |               | 1709.7<br>700               | 1692.7<br>435 | 1691.7<br>595 | <b>13</b> |
| <b>16</b> | 101.07<br>09 | 1667.7<br>548 | 1650.7<br>282 | 1649.7<br>442 | 1695.7<br>497 | 1678.7<br>231 | 1677.7<br>391 | <b>Q</b> | 1473.6<br>539 | 1472.6<br>587 |               | 1546.7<br>067               | 1529.6<br>802 | 1528.6<br>961 | <b>12</b> |
| <b>17</b> | 110.07<br>13 | 1804.8<br>137 | 1787.7<br>871 | 1786.8<br>031 | 1832.8<br>086 | 1815.7<br>820 | 1814.7<br>980 | <b>H</b> | 1336.5<br>950 |               |               | 1418.6<br>481               | 1401.6<br>216 | 1400.6<br>376 | <b>11</b> |
| <b>18</b> | 120.08<br>08 | 1951.8<br>821 | 1934.8<br>555 | 1933.8<br>715 | 1979.8<br>770 | 1962.8<br>505 | 1961.8<br>664 | <b>F</b> | 1189.5<br>266 |               |               | <b>1281.5</b><br><b>892</b> | 1264.5<br>627 | 1263.5<br>786 | <b>10</b> |
| <b>19</b> | 86.096<br>4  | 2064.9<br>661 | 2047.9<br>396 | 2046.9<br>556 | 2092.9<br>611 | 2075.9<br>345 | 2074.9<br>505 | <b>I</b> | 1076.4<br>425 | 1089.4<br>630 | 1103.4<br>786 | <b>1134.5</b><br><b>208</b> | 1117.4<br>943 | 1116.5<br>102 | <b>9</b>  |
| <b>20</b> | 101.07<br>09 | 2193.0<br>247 | 2175.9<br>982 | 2175.0<br>142 | 2221.0<br>196 | 2203.9<br>931 | 2203.0<br>091 | <b>Q</b> | 948.38<br>40  | 947.38<br>87  |               | <b>1021.4</b><br><b>367</b> | 1004.4<br>102 | 1003.4<br>262 | <b>8</b>  |

|    |              |               |               |               |               |               |               |   |              |              |              |              |              |              |   |
|----|--------------|---------------|---------------|---------------|---------------|---------------|---------------|---|--------------|--------------|--------------|--------------|--------------|--------------|---|
| 21 | 101.07<br>09 | 2321.0<br>833 | 2304.0<br>568 | 2303.0<br>727 | 2349.0<br>782 | 2332.0<br>517 | 2331.0<br>677 | Q | 820.32<br>54 | 819.33<br>01 |              | 893.37<br>82 | 876.35<br>16 | 875.36<br>76 | 7 |
| 22 | 133.04<br>30 | 2481.1<br>140 | 2464.0<br>874 | 2463.1<br>034 | 2509.1<br>089 | 2492.0<br>823 | 2491.0<br>983 | C | 660.29<br>47 | 659.29<br>95 |              | 765.31<br>96 | 748.29<br>30 | 747.30<br>90 | 6 |
| 23 | 74.060<br>0  | 2582.1<br>616 | 2565.1<br>351 | 2564.1<br>511 | 2610.1<br>565 | 2593.1<br>300 | 2592.1<br>460 | T | 559.24<br>71 | 572.26<br>75 | 574.24<br>67 | 605.28<br>89 | 588.26<br>24 | 587.27<br>84 | 5 |
| 24 | 88.039<br>3  | 2697.1<br>886 | 2680.1<br>620 | 2679.1<br>780 | 2725.1<br>835 | 2708.1<br>569 | 2707.1<br>729 | D | 444.22<br>01 | 443.22<br>49 |              | 504.24<br>13 | 487.21<br>47 | 486.23<br>07 | 4 |
| 25 | 88.039<br>3  | 2812.2<br>155 | 2795.1<br>890 | 2794.2<br>050 | 2840.2<br>104 | 2823.1<br>839 | 2822.1<br>999 | D | 329.19<br>32 | 328.19<br>79 |              | 389.21<br>43 | 372.18<br>78 | 371.20<br>37 | 3 |
| 26 | 72.080<br>8  | 2911.2<br>839 | 2894.2<br>574 | 2893.2<br>734 | 2939.2<br>788 | 2922.2<br>523 | 2921.2<br>683 | V | 230.12<br>48 | 243.14<br>52 |              | 274.18<br>74 | 257.16<br>08 |              | 2 |
| 27 | 129.11<br>35 |               |               |               |               |               |               | R | 74.023<br>7  | 73.028<br>4  |              | 175.11<br>90 | 158.09<br>24 |              | 1 |

1285

MS/MS Fragmentation of VHVGDEDFVHLR

Found in gi|145579988, Chain A, Stefin B (Cystatin B) Tetramer,

(1422.7471,1+)

Ions Score: 58

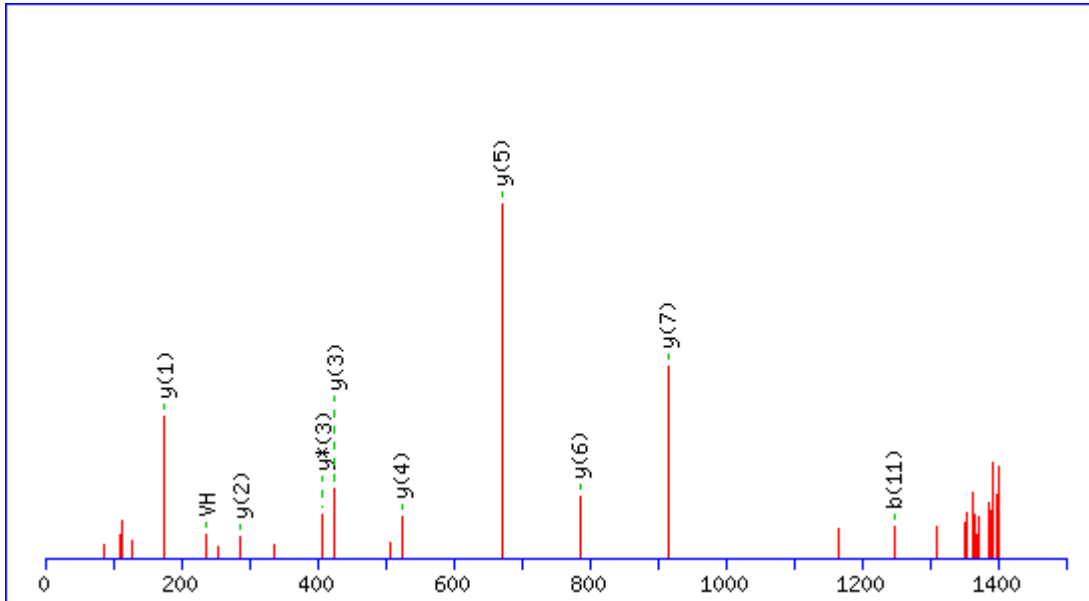

| # | Immon.   | a        | a <sup>0</sup> | b        | b <sup>0</sup> | Seq. | v             | w             | y             | y*            | y <sup>0</sup> | #  |
|---|----------|----------|----------------|----------|----------------|------|---------------|---------------|---------------|---------------|----------------|----|
| 1 | 72.0808  | 72.0808  |                | 100.0757 |                | V    |               |               |               |               |                | 12 |
| 2 | 110.0713 | 209.1397 |                | 237.1346 |                | H    | 1241.590<br>9 |               | 1323.644<br>0 | 1306.617<br>5 | 1305.633<br>5  | 11 |
| 3 | 72.0808  | 308.2081 |                | 336.2030 |                | V    | 1142.522<br>5 | 1155.542<br>9 | 1186.585<br>1 | 1169.558<br>6 | 1168.574<br>5  | 10 |
| 4 | 30.0338  | 365.2296 |                | 393.2245 |                | G    |               |               | 1087.516<br>7 | 1070.490<br>2 | 1069.506<br>1  | 9  |
| 5 | 88.0393  | 480.2565 | 462.2459       | 508.2514 | 490.2409       | D    | 970.4741      | 969.4789      | 1030.495<br>2 | 1013.468<br>7 | 1012.484<br>7  | 8  |
| 6 | 102.0550 | 609.2991 | 591.2885       | 637.2940 | 619.2835       | E    | 841.4315      | 840.4363      | 915.4683      | 898.4417      | 897.4577       | 7  |
| 7 | 88.0393  | 724.3260 | 706.3155       | 752.3210 | 734.3104       | D    | 726.4046      | 725.4093      | 786.4257      | 769.3991      | 768.4151       | 6  |
| 8 | 120.0808 | 871.3945 | 853.3839       | 899.3894 | 881.3788       | F    | 579.3362      |               | 671.3988      | 654.3722      |                | 5  |

|    |          |           |           |           |           |   |          |          |          |          |  |   |
|----|----------|-----------|-----------|-----------|-----------|---|----------|----------|----------|----------|--|---|
| 9  | 72.0808  | 970.4629  | 952.4523  | 998.4578  | 980.4472  | V | 480.2677 | 493.2881 | 524.3303 | 507.3038 |  | 4 |
| 10 | 110.0713 | 1107.5218 | 1089.5112 | 1135.5167 | 1117.5061 | H | 343.2088 |          | 425.2619 | 408.2354 |  | 3 |
| 11 | 86.0964  | 1220.6058 | 1202.5953 | 1248.6008 | 1230.5902 | L | 230.1248 | 229.1295 | 288.2030 | 271.1765 |  | 2 |
| 12 | 129.1135 |           |           |           |           | R | 74.0237  | 73.0284  | 175.1190 | 158.0924 |  |   |

1286

### MS/MS Fragmentation of VVLDDKDYFLFR

Found in gi|4008131, chaperonin 10,

(1529.7937,1+)

Ions Score: 62

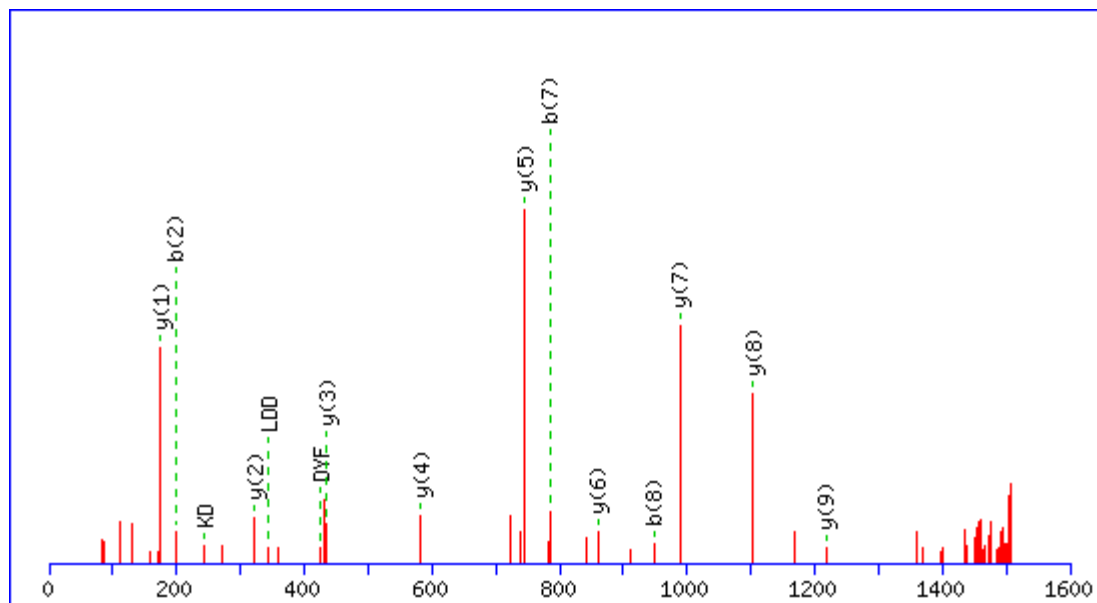



| #  | Immon        | a             | a*            | a <sup>0</sup> | b             | b*            | b <sup>0</sup> | Seq. | v             | w             | y             | y*            | y <sup>0</sup> | #  |
|----|--------------|---------------|---------------|----------------|---------------|---------------|----------------|------|---------------|---------------|---------------|---------------|----------------|----|
| 1  | 72.0808      | 72.0808       |               |                | 100.075<br>7  |               |                | V    |               |               |               |               |                | 12 |
| 2  | 72.0808      | 171.149<br>2  |               |                | 199.144<br>1  |               |                | V    | 1386.66<br>88 | 1399.68<br>92 | 1430.73<br>14 | 1413.70<br>49 | 1412.72<br>09  | 11 |
| 3  | 86.0964      | 284.233<br>3  |               |                | 312.228<br>2  |               |                | L    | 1273.58<br>48 | 1272.58<br>95 | 1331.66<br>30 | 1314.63<br>65 | 1313.65<br>25  | 10 |
| 4  | 88.0393      | 399.260<br>2  |               | 381.249<br>6   | 427.255<br>1  |               | 409.244<br>5   | D    | 1158.55<br>78 | 1157.56<br>26 | 1218.57<br>90 | 1201.55<br>24 | 1200.56<br>84  | 9  |
| 5  | 88.0393      | 514.287<br>1  |               | 496.276<br>6   | 542.282<br>1  |               | 524.271<br>5   | D    | 1043.53<br>09 | 1042.53<br>56 | 1103.55<br>20 | 1086.52<br>55 | 1085.54<br>15  | 8  |
| 6  | 101.107<br>3 | 642.382<br>1  | 625.355<br>6  | 624.371<br>5   | 670.377<br>0  | 653.350<br>5  | 652.366<br>5   | K    | 915.435<br>9  | 914.440<br>7  | 988.525<br>1  | 971.498<br>5  | 970.514<br>5   | 7  |
| 7  | 88.0393      | 757.409<br>0  | 740.382<br>5  | 739.398<br>5   | 785.404<br>0  | 768.377<br>4  | 767.393<br>4   | D    | 800.409<br>0  | 799.413<br>7  | 860.430<br>1  | 843.403<br>6  | 842.419<br>6   | 6  |
| 8  | 136.075<br>7 | 920.472<br>4  | 903.445<br>8  | 902.461<br>8   | 948.467<br>3  | 931.440<br>7  | 930.456<br>7   | Y    | 637.345<br>7  |               | 745.403<br>2  | 728.376<br>6  |                | 5  |
| 9  | 120.080<br>8 | 1067.54<br>08 | 1050.51<br>42 | 1049.53<br>02  | 1095.53<br>57 | 1078.50<br>92 | 1077.52<br>51  | F    | 490.277<br>2  |               | 582.339<br>8  | 565.313<br>3  |                | 4  |
| 10 | 86.0964      | 1180.62<br>49 | 1163.59<br>83 | 1162.61<br>43  | 1208.61<br>98 | 1191.59<br>32 | 1190.60<br>92  | L    | 377.193<br>2  | 376.197<br>9  | 435.271<br>4  | 418.244<br>9  |                | 3  |
| 11 | 120.080<br>8 | 1327.69<br>33 | 1310.66<br>67 | 1309.68<br>27  | 1355.68<br>82 | 1338.66<br>16 | 1337.67<br>76  | F    | 230.124<br>8  |               | 322.187<br>4  | 305.160<br>8  |                | 2  |
| 12 | 129.113<br>5 |               |               |                |               |               |                | R    | 74.0237       | 73.0284       | 175.119<br>0  | 158.092<br>4  |                |    |

1287

MS/MS Fragmentation of TEVNYTQLVDLHAR

Found in gi|75709200, phospholipid hydroperoxide glutathione peroxidase, mitochondrial isoform A precursor, (1658.8502,1+)

Ions Score: 89

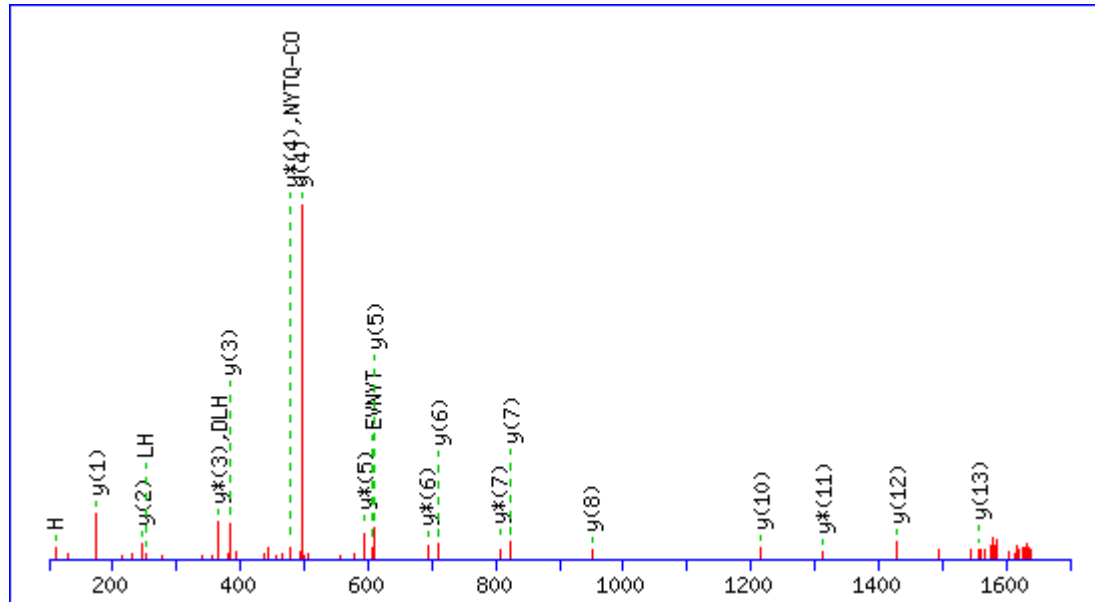

| # | Immon        | a            | a*     | a <sup>0</sup> | b            | b*     | b <sup>0</sup> | Seq. | v             | w             | w' | y             | y*            | y <sup>0</sup> | #  |
|---|--------------|--------------|--------|----------------|--------------|--------|----------------|------|---------------|---------------|----|---------------|---------------|----------------|----|
| 1 | 74.060<br>0  | 74.060<br>0  |        | 56.049<br>5    | 102.05<br>50 |        | 84.044<br>4    | T    |               |               |    |               |               |                | 14 |
| 2 | 102.05<br>50 | 203.10<br>26 |        | 185.09<br>21   | 231.09<br>75 |        | 213.08<br>70   | E    | 1483.7<br>652 | 1482.7<br>700 |    | 1557.8<br>020 | 1540.7<br>754 | 1539.7<br>914  | 13 |
| 3 | 72.080<br>8  | 302.17<br>10 |        | 284.16<br>05   | 330.16<br>60 |        | 312.15<br>54   | V    | 1384.6<br>968 | 1397.7<br>172 |    | 1428.7<br>594 | 1411.7<br>328 | 1410.7<br>488  | 12 |
| 4 | 87.055       | 416.21       | 399.18 | 398.20         | 444.20       | 427.18 | 426.19         | N    | 1270.6        | 1269.6        |    | 1329.6        | 1312.6        | 1311.6         | 11 |

|           |                            |               |               |               |                            |               |               |          |               |               |               |                             |                            |               |           |
|-----------|----------------------------|---------------|---------------|---------------|----------------------------|---------------|---------------|----------|---------------|---------------|---------------|-----------------------------|----------------------------|---------------|-----------|
|           | 3                          | 40            | 74            | 34            | 89                         | 23            | 83            |          | 539           | 586           |               | 910                         | <b>644</b>                 | 804           |           |
| <b>5</b>  | 136.07<br>57               | 579.27<br>73  | 562.25<br>08  | 561.26<br>67  | <b>607.27</b><br><b>22</b> | 590.24<br>57  | 589.26<br>17  | <b>Y</b> | 1107.5<br>905 |               |               | <b>1215.6</b><br><b>480</b> | 1198.6<br>215              | 1197.6<br>375 | <b>10</b> |
| <b>6</b>  | 74.060<br>0                | 680.32<br>50  | 663.29<br>84  | 662.31<br>44  | 708.31<br>99               | 691.29<br>33  | 690.30<br>93  | <b>T</b> | 1006.5<br>429 | 1019.5<br>633 | 1021.5<br>425 | 1052.5<br>847               | 1035.5<br>582              | 1034.5<br>742 | <b>9</b>  |
| <b>7</b>  | 101.07<br>09               | 808.38<br>36  | 791.35<br>70  | 790.37<br>30  | 836.37<br>85               | 819.35<br>19  | 818.36<br>79  | <b>Q</b> | 878.48<br>43  | 877.48<br>90  |               | <b>951.53</b><br><b>70</b>  | 934.51<br>05               | 933.52<br>65  | <b>8</b>  |
| <b>8</b>  | 86.096<br>4                | 921.46<br>76  | 904.44<br>11  | 903.45<br>71  | 949.46<br>25               | 932.43<br>60  | 931.45<br>20  | <b>L</b> | 765.40<br>02  | 764.40<br>50  |               | <b>823.47</b><br><b>85</b>  | <b>806.45</b><br><b>19</b> | 805.46<br>79  | <b>7</b>  |
| <b>9</b>  | 72.080<br>8                | 1020.5<br>360 | 1003.5<br>095 | 1002.5<br>255 | 1048.5<br>310              | 1031.5<br>044 | 1030.5<br>204 | <b>V</b> | 666.33<br>18  | 679.35<br>22  |               | <b>710.39</b><br><b>44</b>  | <b>693.36</b><br><b>78</b> | 692.38<br>38  | <b>6</b>  |
| <b>10</b> | 88.039<br>3                | 1135.5<br>630 | 1118.5<br>364 | 1117.5<br>524 | 1163.5<br>579              | 1146.5<br>313 | 1145.5<br>473 | <b>D</b> | 551.30<br>49  | 550.30<br>96  |               | <b>611.32</b><br><b>60</b>  | <b>594.29</b><br><b>94</b> | 593.31<br>54  | <b>5</b>  |
| <b>11</b> | 86.096<br>4                | 1248.6<br>470 | 1231.6<br>205 | 1230.6<br>365 | 1276.6<br>420              | 1259.6<br>154 | 1258.6<br>314 | <b>L</b> | 438.22<br>08  | 437.22<br>55  |               | <b>496.29</b><br><b>90</b>  | <b>479.27</b><br><b>25</b> |               | <b>4</b>  |
| <b>12</b> | <b>110.07</b><br><b>13</b> | 1385.7<br>060 | 1368.6<br>794 | 1367.6<br>954 | 1413.7<br>009              | 1396.6<br>743 | 1395.6<br>903 | <b>H</b> | 301.16<br>19  |               |               | <b>383.21</b><br><b>50</b>  | <b>366.18</b><br><b>84</b> |               | <b>3</b>  |
| <b>13</b> | 44.049<br>5                | 1456.7<br>431 | 1439.7<br>165 | 1438.7<br>325 | 1484.7<br>380              | 1467.7<br>114 | 1466.7<br>274 | <b>A</b> | 230.12<br>48  |               |               | <b>246.15</b><br><b>61</b>  | 229.12<br>95               |               | <b>2</b>  |
| <b>14</b> | 129.11<br>35               |               |               |               |                            |               |               | <b>R</b> | 74.023<br>7   | 73.028<br>4   |               | <b>175.11</b><br><b>90</b>  | 158.09<br>24               |               |           |

1288

MS/MS Fragmentation of DIVLTNVTVVQLLR

Found in gi|9502072, spermatogenic cell-specific glyceraldehyde 3-phosphate dehydrogenase-2,

(1582.9894,1+)

Ions Score: 51

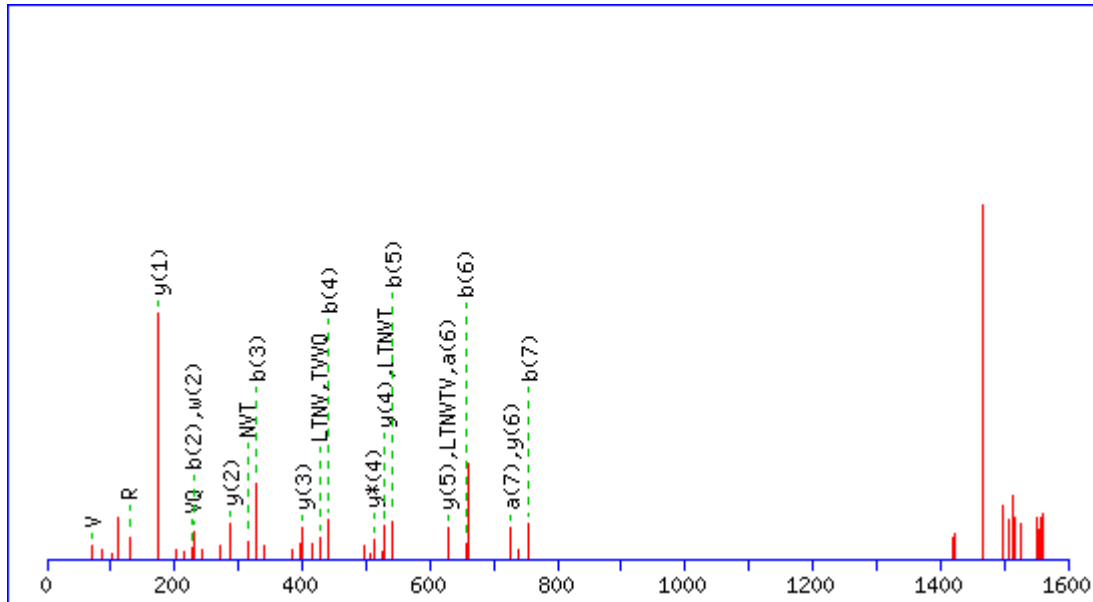

| # | Immon       | a            | a*     | a <sup>0</sup> | b            | b*     | b <sup>0</sup> | Seq. | v             | w             | w'            | y             | y*            | y <sup>0</sup> | #  |
|---|-------------|--------------|--------|----------------|--------------|--------|----------------|------|---------------|---------------|---------------|---------------|---------------|----------------|----|
| 1 | 88.039<br>3 | 88.039<br>3  |        | 70.028<br>7    | 116.03<br>42 |        | 98.023<br>7    | D    |               |               |               |               |               |                | 14 |
| 2 | 86.096<br>4 | 201.12<br>34 |        | 183.11<br>28   | 229.11<br>83 |        | 211.10<br>77   | I    | 1409.8<br>475 | 1422.8<br>679 | 1436.8<br>835 | 1467.9<br>257 | 1450.8<br>992 | 1449.9<br>152  | 13 |
| 3 | 72.080<br>8 | 300.19<br>18 |        | 282.18<br>12   | 328.18<br>67 |        | 310.17<br>61   | V    | 1310.7<br>791 | 1323.7<br>995 |               | 1354.8<br>417 | 1337.8<br>151 | 1336.8<br>311  | 12 |
| 4 | 86.096<br>4 | 413.27<br>58 |        | 395.26<br>53   | 441.27<br>08 |        | 423.26<br>02   | L    | 1197.6<br>950 | 1196.6<br>998 |               | 1255.7<br>732 | 1238.7<br>467 | 1237.7<br>627  | 11 |
| 5 | 74.060<br>0 | 514.32<br>35 |        | 496.31<br>30   | 542.31<br>84 |        | 524.30<br>79   | T    | 1096.6<br>473 | 1109.6<br>677 | 1111.6<br>470 | 1142.6<br>892 | 1125.6<br>626 | 1124.6<br>786  | 10 |
| 6 | 87.055      | 628.36       | 611.33 | 610.35         | 656.36       | 639.33 | 638.35         | N    | 982.60        | 981.60        |               | 1041.6        | 1024.6        | 1023.6         | 9  |

|           |                            |                            |               |               |                            |               |               |          |              |                            |              |                            |                            |              |          |
|-----------|----------------------------|----------------------------|---------------|---------------|----------------------------|---------------|---------------|----------|--------------|----------------------------|--------------|----------------------------|----------------------------|--------------|----------|
|           | 3                          | <b>65</b>                  | 99            | 59            | <b>14</b>                  | 48            | 08            |          | 44           | 91                         |              | 415                        | 150                        | 309          |          |
| <b>7</b>  | <b>72.080</b><br><b>8</b>  | <b>727.43</b><br><b>49</b> | 710.40<br>83  | 709.42<br>43  | <b>755.42</b><br><b>98</b> | 738.40<br>32  | 737.41<br>92  | <b>V</b> | 883.53<br>60 | 896.55<br>64               |              | 927.59<br>86               | 910.57<br>20               | 909.58<br>80 | <b>8</b> |
| <b>8</b>  | 74.060<br>0                | 828.48<br>25               | 811.45<br>60  | 810.47<br>20  | 856.47<br>75               | 839.45<br>09  | 838.46<br>69  | <b>T</b> | 782.48<br>83 | 795.50<br>87               | 797.48<br>80 | 828.53<br>02               | 811.50<br>36               | 810.51<br>96 | <b>7</b> |
| <b>9</b>  | <b>72.080</b><br><b>8</b>  | 927.55<br>10               | 910.52<br>44  | 909.54<br>04  | 955.54<br>59               | 938.51<br>93  | 937.53<br>53  | <b>V</b> | 683.41<br>99 | 696.44<br>03               |              | <b>727.48</b><br><b>25</b> | 710.45<br>59               |              | <b>6</b> |
| <b>10</b> | <b>72.080</b><br><b>8</b>  | 1026.6<br>194              | 1009.5<br>928 | 1008.6<br>088 | 1054.6<br>143              | 1037.5<br>877 | 1036.6<br>037 | <b>V</b> | 584.35<br>15 | 597.37<br>19               |              | <b>628.41</b><br><b>41</b> | 611.38<br>75               |              | <b>5</b> |
| <b>11</b> | 101.07<br>09               | 1154.6<br>780              | 1137.6<br>514 | 1136.6<br>674 | 1182.6<br>729              | 1165.6<br>463 | 1164.6<br>623 | <b>Q</b> | 456.29<br>29 | 455.29<br>76               |              | <b>529.34</b><br><b>57</b> | <b>512.31</b><br><b>91</b> |              | <b>4</b> |
| <b>12</b> | 86.096<br>4                | 1267.7<br>620              | 1250.7<br>355 | 1249.7<br>515 | 1295.7<br>569              | 1278.7<br>304 | 1277.7<br>464 | <b>L</b> | 343.20<br>88 | 342.21<br>36               |              | <b>401.28</b><br><b>71</b> | 384.26<br>05               |              | <b>3</b> |
| <b>13</b> | 86.096<br>4                | 1380.8<br>461              | 1363.8<br>195 | 1362.8<br>355 | 1408.8<br>410              | 1391.8<br>144 | 1390.8<br>304 | <b>L</b> | 230.12<br>48 | <b>229.12</b><br><b>95</b> |              | <b>288.20</b><br><b>30</b> | 271.17<br>65               |              | <b>2</b> |
| <b>14</b> | <b>129.11</b><br><b>35</b> |                            |               |               |                            |               |               | <b>R</b> | 74.023<br>7  | 73.028<br>4                |              | <b>175.11</b><br><b>90</b> | 158.09<br>24               |              | <b>1</b> |

1289

MS/MS Fragmentation of SGYHQSASEHGLVVIAPDTSPR

Found in gi|55957281, esterase D/formylglutathione hydrolase,

(2308.0579,1+)

Ions Score:149

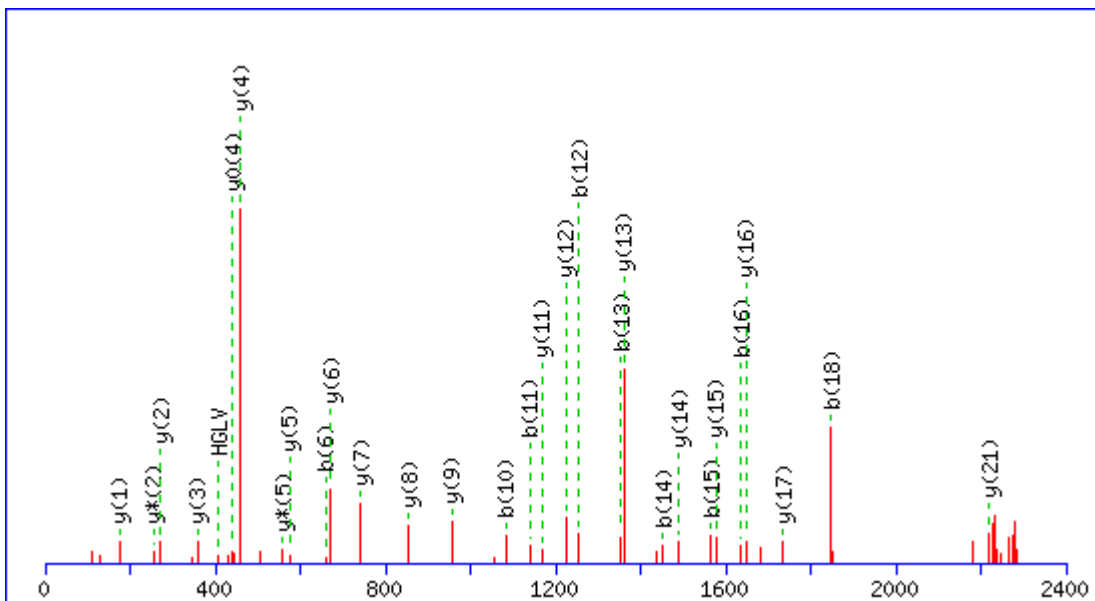

| # | Immon        | a            | a*           | a <sup>0</sup> | b            | b*           | b <sup>0</sup> | Seq. | v             | w             | w' | y             | y*            | y <sup>0</sup> | #  |
|---|--------------|--------------|--------------|----------------|--------------|--------------|----------------|------|---------------|---------------|----|---------------|---------------|----------------|----|
| 1 | 60.044<br>4  | 60.044<br>4  |              | 42.033<br>8    | 88.039<br>3  |              | 70.028<br>7    | S    |               |               |    |               |               |                | 22 |
| 2 | 30.033<br>8  | 117.06<br>59 |              | 99.055<br>3    | 145.06<br>08 |              | 127.05<br>02   | G    |               |               |    | 2221.0<br>996 | 2204.0<br>731 | 2203.0<br>891  | 21 |
| 3 | 136.07<br>57 | 280.12<br>92 |              | 262.11<br>86   | 308.12<br>41 |              | 290.11<br>35   | Y    | 2056.0<br>206 |               |    | 2164.0<br>782 | 2147.0<br>516 | 2146.0<br>676  | 20 |
| 4 | 110.07<br>13 | 417.18<br>81 |              | 399.17<br>75   | 445.18<br>30 |              | 427.17<br>24   | H    | 1918.9<br>617 |               |    | 2001.0<br>148 | 1983.9<br>883 | 1983.0<br>043  | 19 |
| 5 | 101.07<br>09 | 545.24<br>67 | 528.22<br>01 | 527.23<br>61   | 573.24<br>16 | 556.21<br>50 | 555.23<br>10   | Q    | 1790.9<br>032 | 1789.9<br>079 |    | 1863.9<br>559 | 1846.9<br>294 | 1845.9<br>454  | 18 |
| 6 | 60.044<br>4  | 632.27<br>87 | 615.25<br>22 | 614.26<br>81   | 660.27<br>36 | 643.24<br>71 | 642.26<br>31   | S    | 1703.8<br>711 | 1702.8<br>759 |    | 1735.8<br>973 | 1718.8<br>708 | 1717.8<br>868  | 17 |
| 7 | 44.049       | 703.31       | 686.28       | 685.30         | 731.31       | 714.28       | 713.30         | A    | 1632.8        |               |    | 1648.8        | 1631.8        | 1630.8         | 16 |

|           |              |               |               |               |                       |               |               |          |               |               |              |                       |                      |                      |           |
|-----------|--------------|---------------|---------------|---------------|-----------------------|---------------|---------------|----------|---------------|---------------|--------------|-----------------------|----------------------|----------------------|-----------|
|           | 5            | 58            | 93            | 52            | 07                    | 42            | 02            |          | 340           |               |              | <b>653</b>            | 388                  | 547                  |           |
| <b>8</b>  | 60.044<br>4  | 790.34<br>78  | 773.32<br>13  | 772.33<br>73  | 818.34<br>28          | 801.31<br>62  | 800.33<br>22  | <b>S</b> | 1545.8<br>020 | 1544.8<br>067 |              | <b>1577.8<br/>282</b> | 1560.8<br>016        | 1559.8<br>176        | <b>15</b> |
| <b>9</b>  | 102.05<br>50 | 919.39<br>04  | 902.36<br>39  | 901.37<br>99  | 947.38<br>54          | 930.35<br>88  | 929.37<br>48  | <b>E</b> | 1416.7<br>594 | 1415.7<br>641 |              | <b>1490.7<br/>962</b> | 1473.7<br>696        | 1472.7<br>856        | <b>14</b> |
| <b>10</b> | 110.07<br>13 | 1056.4<br>493 | 1039.4<br>228 | 1038.4<br>388 | <b>1084.4<br/>443</b> | 1067.4<br>177 | 1066.4<br>337 | <b>H</b> | 1279.7<br>005 |               |              | <b>1361.7<br/>536</b> | 1344.7<br>270        | 1343.7<br>430        | <b>13</b> |
| <b>11</b> | 30.033<br>8  | 1113.4<br>708 | 1096.4<br>443 | 1095.4<br>602 | <b>1141.4<br/>657</b> | 1124.4<br>392 | 1123.4<br>552 | <b>G</b> |               |               |              | <b>1224.6<br/>947</b> | 1207.6<br>681        | 1206.6<br>841        | <b>12</b> |
| <b>12</b> | 86.096<br>4  | 1226.5<br>549 | 1209.5<br>283 | 1208.5<br>443 | <b>1254.5<br/>498</b> | 1237.5<br>232 | 1236.5<br>392 | <b>L</b> | 1109.5<br>950 | 1108.5<br>997 |              | <b>1167.6<br/>732</b> | 1150.6<br>467        | 1149.6<br>626        | <b>11</b> |
| <b>13</b> | 72.080<br>8  | 1325.6<br>233 | 1308.5<br>967 | 1307.6<br>127 | <b>1353.6<br/>182</b> | 1336.5<br>917 | 1335.6<br>076 | <b>V</b> | 1010.5<br>265 | 1023.5<br>469 |              | 1054.5<br>891         | 1037.5<br>626        | 1036.5<br>786        | <b>10</b> |
| <b>14</b> | 72.080<br>8  | 1424.6<br>917 | 1407.6<br>652 | 1406.6<br>811 | <b>1452.6<br/>866</b> | 1435.6<br>601 | 1434.6<br>761 | <b>V</b> | 911.45<br>81  | 924.47<br>85  |              | <b>955.52<br/>07</b>  | 938.49<br>42         | 937.51<br>02         | <b>9</b>  |
| <b>15</b> | 86.096<br>4  | 1537.7<br>758 | 1520.7<br>492 | 1519.7<br>652 | <b>1565.7<br/>707</b> | 1548.7<br>441 | 1547.7<br>601 | <b>I</b> | 798.37<br>41  | 811.39<br>45  | 825.41<br>01 | <b>856.45<br/>23</b>  | 839.42<br>58         | 838.44<br>17         | <b>8</b>  |
| <b>16</b> | 44.049<br>5  | 1608.8<br>129 | 1591.7<br>863 | 1590.8<br>023 | <b>1636.8<br/>078</b> | 1619.7<br>812 | 1618.7<br>972 | <b>A</b> | 727.33<br>69  |               |              | <b>743.36<br/>82</b>  | 726.34<br>17         | 725.35<br>77         | <b>7</b>  |
| <b>17</b> | 70.065<br>1  | 1705.8<br>656 | 1688.8<br>391 | 1687.8<br>551 | 1733.8<br>606         | 1716.8<br>340 | 1715.8<br>500 | <b>P</b> | 630.28<br>42  | 629.28<br>89  |              | <b>672.33<br/>11</b>  | 655.30<br>46         | 654.32<br>06         | <b>6</b>  |
| <b>18</b> | 88.039<br>3  | 1820.8<br>926 | 1803.8<br>660 | 1802.8<br>820 | <b>1848.8<br/>875</b> | 1831.8<br>610 | 1830.8<br>769 | <b>D</b> | 515.25<br>72  | 514.26<br>20  |              | <b>575.27<br/>84</b>  | <b>558.25<br/>18</b> | 557.26<br>78         | <b>5</b>  |
| <b>19</b> | 74.060<br>0  | 1921.9<br>403 | 1904.9<br>137 | 1903.9<br>297 | 1949.9<br>352         | 1932.9<br>086 | 1931.9<br>246 | <b>T</b> | 414.20<br>96  | 427.23<br>00  | 429.20<br>92 | <b>460.25<br/>14</b>  | 443.22<br>49         | <b>442.24<br/>09</b> | <b>4</b>  |
| <b>20</b> | 60.044<br>4  | 2008.9<br>723 | 1991.9<br>457 | 1990.9<br>617 | 2036.9<br>672         | 2019.9<br>407 | 2018.9<br>566 | <b>S</b> | 327.17<br>75  | 326.18<br>23  |              | <b>359.20<br/>37</b>  | 342.17<br>72         | 341.19<br>32         | <b>3</b>  |

|    |              |               |               |               |               |               |               |   |              |              |  |              |              |  |   |
|----|--------------|---------------|---------------|---------------|---------------|---------------|---------------|---|--------------|--------------|--|--------------|--------------|--|---|
| 21 | 70.065<br>1  | 2106.0<br>251 | 2088.9<br>985 | 2088.0<br>145 | 2134.0<br>200 | 2116.9<br>934 | 2116.0<br>094 | P | 230.12<br>48 | 229.12<br>95 |  | 272.17<br>17 | 255.14<br>52 |  | 2 |
| 22 | 129.11<br>35 |               |               |               |               |               |               | R | 74.023<br>7  | 73.028<br>4  |  | 175.11<br>90 | 158.09<br>24 |  | 1 |

1290

MS/MS Fragmentation of PMTLGYWDIR

Found in gi|468260, glutathione S-transferase GSTM5-5,

(1267.601,1+)

Ions Score:39

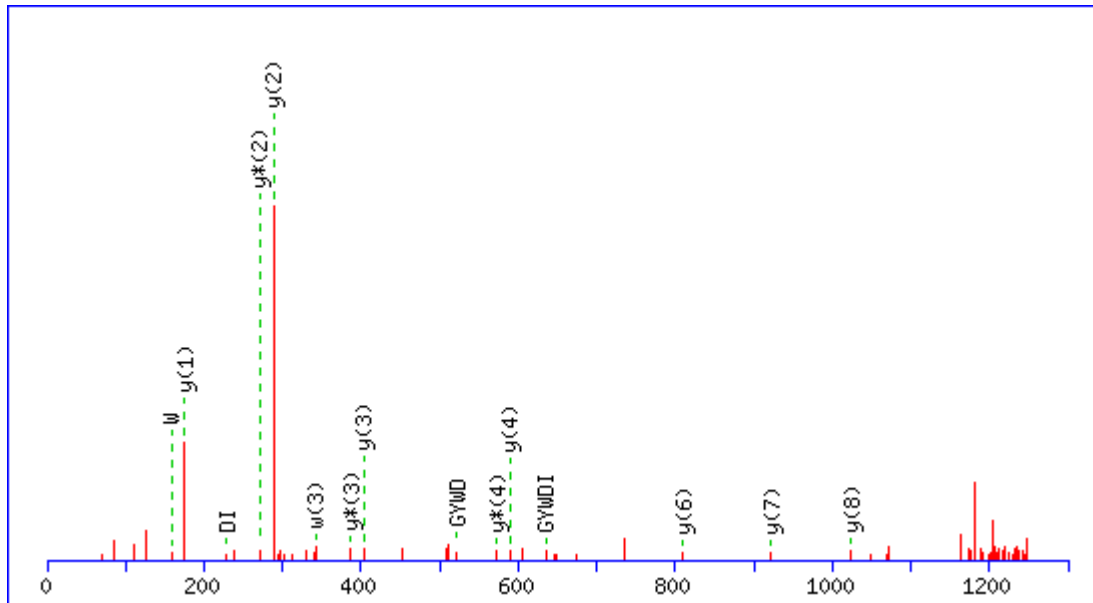

| # | Immon. | a | a <sup>0</sup> | b | b <sup>0</sup> | Seq. | v | w | w' | y | y* | y <sup>0</sup> | # |
|---|--------|---|----------------|---|----------------|------|---|---|----|---|----|----------------|---|
|---|--------|---|----------------|---|----------------|------|---|---|----|---|----|----------------|---|



|           |                            |               |              |               |               |          |               |                            |              |                             |                            |               |           |
|-----------|----------------------------|---------------|--------------|---------------|---------------|----------|---------------|----------------------------|--------------|-----------------------------|----------------------------|---------------|-----------|
| <b>1</b>  | 70.0651                    | 70.0651       |              | 98.0600       |               | <b>P</b> |               |                            |              |                             |                            |               | <b>10</b> |
| <b>2</b>  | 56.0495                    | 153.102<br>2  |              | 181.097<br>2  |               | <b>M</b> | 1078.53<br>16 | 1077.53<br>64              |              | 1106.56<br>29               | 1089.53<br>64              | 1088.55<br>24 | <b>9</b>  |
| <b>3</b>  | 74.0600                    | 254.149<br>9  | 236.139<br>4 | 282.144<br>8  | 264.134<br>3  | <b>T</b> | 977.483<br>9  | 990.504<br>3               | 992.483<br>6 | <b>1023.52</b><br><b>58</b> | 1006.49<br>93              | 1005.51<br>52 | <b>8</b>  |
| <b>4</b>  | 86.0964                    | 367.234<br>0  | 349.223<br>4 | 395.228<br>9  | 377.218<br>3  | <b>L</b> | 864.399<br>9  | 863.404<br>6               |              | <b>922.478</b><br><b>1</b>  | 905.451<br>6               | 904.467<br>6  | <b>7</b>  |
| <b>5</b>  | 30.0338                    | 424.255<br>5  | 406.244<br>9 | 452.250<br>4  | 434.239<br>8  | <b>G</b> |               |                            |              | <b>809.394</b><br><b>1</b>  | 792.367<br>5               | 791.383<br>5  | <b>6</b>  |
| <b>6</b>  | 136.075<br>7               | 587.318<br>8  | 569.308<br>2 | 615.313<br>7  | 597.303<br>1  | <b>Y</b> | 644.315<br>1  |                            |              | 752.372<br>6                | 735.346<br>1               | 734.362<br>0  | <b>5</b>  |
| <b>7</b>  | <b>159.091</b><br><b>7</b> | 773.398<br>1  | 755.387<br>5 | 801.393<br>0  | 783.382<br>4  | <b>W</b> | 458.235<br>8  |                            |              | <b>589.309</b><br><b>3</b>  | <b>572.282</b><br><b>7</b> | 571.298<br>7  | <b>4</b>  |
| <b>8</b>  | 88.0393                    | 888.425<br>0  | 870.414<br>5 | 916.420<br>0  | 898.409<br>4  | <b>D</b> | 343.208<br>8  | <b>342.213</b><br><b>6</b> |              | <b>403.230</b><br><b>0</b>  | <b>386.203</b><br><b>4</b> | 385.219<br>4  | <b>3</b>  |
| <b>9</b>  | 86.0964                    | 1001.50<br>91 | 983.498<br>5 | 1029.50<br>40 | 1011.49<br>35 | <b>I</b> | 230.124<br>8  | 243.145<br>2               | 257.160<br>8 | <b>288.203</b><br><b>0</b>  | <b>271.176</b><br><b>5</b> |               | <b>2</b>  |
| <b>10</b> | 129.113<br>5               |               |              |               |               | <b>R</b> | 74.0237       | 73.0284                    |              | <b>175.119</b><br><b>0</b>  | 158.092<br>4               |               |           |

1291

MS/MS Fragmentation of IPADVDPDLTITSSLSSDGVLTVNGPR

Found in gi|2852648, unknown,

(2624.271,1+)

Ions Score:42

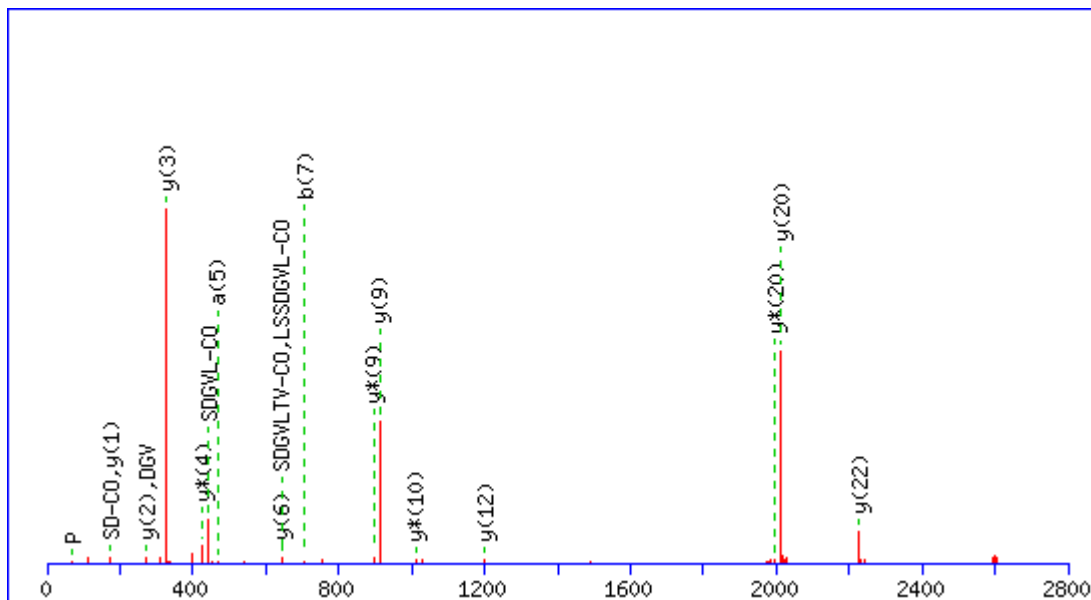

| # | Immon       | a            | a* | a <sup>0</sup> | b            | b* | b <sup>0</sup> | Seq. | v             | w             | w' | y             | y*            | y <sup>0</sup> | #  |
|---|-------------|--------------|----|----------------|--------------|----|----------------|------|---------------|---------------|----|---------------|---------------|----------------|----|
| 1 | 86.096<br>4 | 86.096<br>4  |    |                | 114.09<br>13 |    |                | I    |               |               |    |               |               |                | 26 |
| 2 | 70.065<br>1 | 183.14<br>92 |    |                | 211.14<br>41 |    |                | P    | 2469.2<br>467 | 2468.2<br>515 |    | 2511.2<br>937 | 2494.2<br>671 | 2493.2<br>831  | 25 |
| 3 | 44.049<br>5 | 254.18<br>63 |    |                | 282.18<br>12 |    |                | A    | 2398.2<br>096 |               |    | 2414.2<br>409 | 2397.2<br>144 | 2396.2<br>304  | 24 |
| 4 | 88.039<br>3 | 369.21<br>32 |    | 351.20<br>27   | 397.20<br>82 |    | 379.19<br>76   | D    | 2283.1<br>827 | 2282.1<br>874 |    | 2343.2<br>038 | 2326.1<br>773 | 2325.1<br>932  | 23 |
| 5 | 72.080<br>8 | 468.28<br>17 |    | 450.27<br>11   | 496.27<br>66 |    | 478.26<br>60   | V    | 2184.1<br>143 | 2197.1<br>347 |    | 2228.1<br>769 | 2211.1<br>503 | 2210.1<br>663  | 22 |
| 6 | 88.039<br>3 | 583.30<br>86 |    | 565.29<br>80   | 611.30<br>35 |    | 593.29<br>30   | D    | 2069.0<br>873 | 2068.0<br>921 |    | 2129.1<br>085 | 2112.0<br>819 | 2111.0<br>979  | 21 |
| 7 | 70.065      | 680.36       |    | 662.35         | 708.35       |    | 690.34         | P    | 1972.0        | 1971.0        |    | 2014.0        | 1997.0        | 1996.0         | 20 |

|           |             |               |  |               |               |  |               |          |               |               |               |                             |                             |               |           |
|-----------|-------------|---------------|--|---------------|---------------|--|---------------|----------|---------------|---------------|---------------|-----------------------------|-----------------------------|---------------|-----------|
|           | <b>1</b>    | 14            |  | 08            | <b>63</b>     |  | 57            |          | 346           | 393           |               | <b>815</b>                  | <b>550</b>                  | 709           |           |
| <b>8</b>  | 86.096<br>4 | 793.44<br>54  |  | 775.43<br>49  | 821.44<br>03  |  | 803.42<br>98  | <b>L</b> | 1858.9<br>505 | 1857.9<br>552 |               | 1917.0<br>287               | 1900.0<br>022               | 1899.0<br>182 | <b>19</b> |
| <b>9</b>  | 74.060<br>0 | 894.49<br>31  |  | 876.48<br>25  | 922.48<br>80  |  | 904.47<br>75  | <b>T</b> | 1757.9<br>028 | 1770.9<br>232 | 1772.9<br>025 | 1803.9<br>447               | 1786.9<br>181               | 1785.9<br>341 | <b>18</b> |
| <b>10</b> | 86.096<br>4 | 1007.5<br>772 |  | 989.56<br>66  | 1035.5<br>721 |  | 1017.5<br>615 | <b>I</b> | 1644.8<br>188 | 1657.8<br>392 | 1671.8<br>548 | 1702.8<br>970               | 1685.8<br>705               | 1684.8<br>864 | <b>17</b> |
| <b>11</b> | 74.060<br>0 | 1108.6<br>249 |  | 1090.6<br>143 | 1136.6<br>198 |  | 1118.6<br>092 | <b>T</b> | 1543.7<br>711 | 1556.7<br>915 | 1558.7<br>707 | 1589.8<br>129               | 1572.7<br>864               | 1571.8<br>024 | <b>16</b> |
| <b>12</b> | 60.044<br>4 | 1195.6<br>569 |  | 1177.6<br>463 | 1223.6<br>518 |  | 1205.6<br>412 | <b>S</b> | 1456.7<br>390 | 1455.7<br>438 |               | 1488.7<br>653               | 1471.7<br>387               | 1470.7<br>547 | <b>15</b> |
| <b>13</b> | 60.044<br>4 | 1282.6<br>889 |  | 1264.6<br>783 | 1310.6<br>838 |  | 1292.6<br>733 | <b>S</b> | 1369.7<br>070 | 1368.7<br>118 |               | 1401.7<br>332               | 1384.7<br>067               | 1383.7<br>227 | <b>14</b> |
| <b>14</b> | 86.096<br>4 | 1395.7<br>730 |  | 1377.7<br>624 | 1423.7<br>679 |  | 1405.7<br>573 | <b>L</b> | 1256.6<br>230 | 1255.6<br>277 |               | 1314.7<br>012               | 1297.6<br>747               | 1296.6<br>906 | <b>13</b> |
| <b>15</b> | 60.044<br>4 | 1482.8<br>050 |  | 1464.7<br>944 | 1510.7<br>999 |  | 1492.7<br>894 | <b>S</b> | 1169.5<br>909 | 1168.5<br>957 |               | <b>1201.6</b><br><b>171</b> | 1184.5<br>906               | 1183.6<br>066 | <b>12</b> |
| <b>16</b> | 60.044<br>4 | 1569.8<br>370 |  | 1551.8<br>265 | 1597.8<br>319 |  | 1579.8<br>214 | <b>S</b> | 1082.5<br>589 | 1081.5<br>636 |               | 1114.5<br>851               | 1097.5<br>586               | 1096.5<br>745 | <b>11</b> |
| <b>17</b> | 88.039<br>3 | 1684.8<br>640 |  | 1666.8<br>534 | 1712.8<br>589 |  | 1694.8<br>483 | <b>D</b> | 967.53<br>20  | 966.53<br>67  |               | 1027.5<br>531               | <b>1010.5</b><br><b>265</b> | 1009.5<br>425 | <b>10</b> |
| <b>18</b> | 30.033<br>8 | 1741.8<br>854 |  | 1723.8<br>749 | 1769.8<br>804 |  | 1751.8<br>698 | <b>G</b> |               |               |               | <b>912.52</b><br><b>61</b>  | <b>895.49</b><br><b>96</b>  | 894.51<br>56  | <b>9</b>  |
| <b>19</b> | 72.080<br>8 | 1840.9<br>539 |  | 1822.9<br>433 | 1868.9<br>488 |  | 1850.9<br>382 | <b>V</b> | 811.44<br>21  | 824.46<br>25  |               | 855.50<br>47                | 838.47<br>81                | 837.49<br>41  | <b>8</b>  |
| <b>20</b> | 86.096<br>4 | 1954.0<br>379 |  | 1936.0<br>273 | 1982.0<br>328 |  | 1964.0<br>223 | <b>L</b> | 698.35<br>80  | 697.36<br>28  |               | 756.43<br>63                | 739.40<br>97                | 738.42<br>57  | <b>7</b>  |

|           |                           |               |               |               |               |               |               |          |              |              |              |                            |                            |              |          |
|-----------|---------------------------|---------------|---------------|---------------|---------------|---------------|---------------|----------|--------------|--------------|--------------|----------------------------|----------------------------|--------------|----------|
| <b>21</b> | 74.060<br>0               | 2055.0<br>856 |               | 2037.0<br>750 | 2083.0<br>805 |               | 2065.0<br>699 | <b>T</b> | 597.31<br>03 | 610.33<br>07 | 612.31<br>00 | <b>643.35</b><br><b>22</b> | 626.32<br>57               | 625.34<br>16 | <b>6</b> |
| <b>22</b> | 72.080<br>8               | 2154.1<br>540 |               | 2136.1<br>434 | 2182.1<br>489 |               | 2164.1<br>384 | <b>V</b> | 498.24<br>19 | 511.26<br>23 |              | 542.30<br>45               | 525.27<br>80               |              | <b>5</b> |
| <b>23</b> | 87.055<br>3               | 2268.1<br>969 | 2251.1<br>704 | 2250.1<br>864 | 2296.1<br>918 | 2279.1<br>653 | 2278.1<br>813 | <b>N</b> | 384.19<br>90 | 383.20<br>37 |              | 443.23<br>61               | <b>426.20</b><br><b>96</b> |              | <b>4</b> |
| <b>24</b> | 30.033<br>8               | 2325.2<br>184 | 2308.1<br>918 | 2307.2<br>078 | 2353.2<br>133 | 2336.1<br>868 | 2335.2<br>027 | <b>G</b> |              |              |              | <b>329.19</b><br><b>32</b> | 312.16<br>66               |              | <b>3</b> |
| <b>25</b> | <b>70.065</b><br><b>1</b> | 2422.2<br>712 | 2405.2<br>446 | 2404.2<br>606 | 2450.2<br>661 | 2433.2<br>395 | 2432.2<br>555 | <b>P</b> | 230.12<br>48 | 229.12<br>95 |              | <b>272.17</b><br><b>17</b> | 255.14<br>52               |              | <b>2</b> |
| <b>26</b> | 129.11<br>35              |               |               |               |               |               |               | <b>R</b> | 74.023<br>7  | 73.028<br>4  |              | <b>175.11</b><br><b>90</b> | 158.09<br>24               |              | <b>1</b> |

1292

MS/MS Fragmentation of ETVVEVPQVTWEDIGGLEDVKR

Found in gi|11095437, valosin-containing protein,

(2498.2822,1+)

Ions Score:117

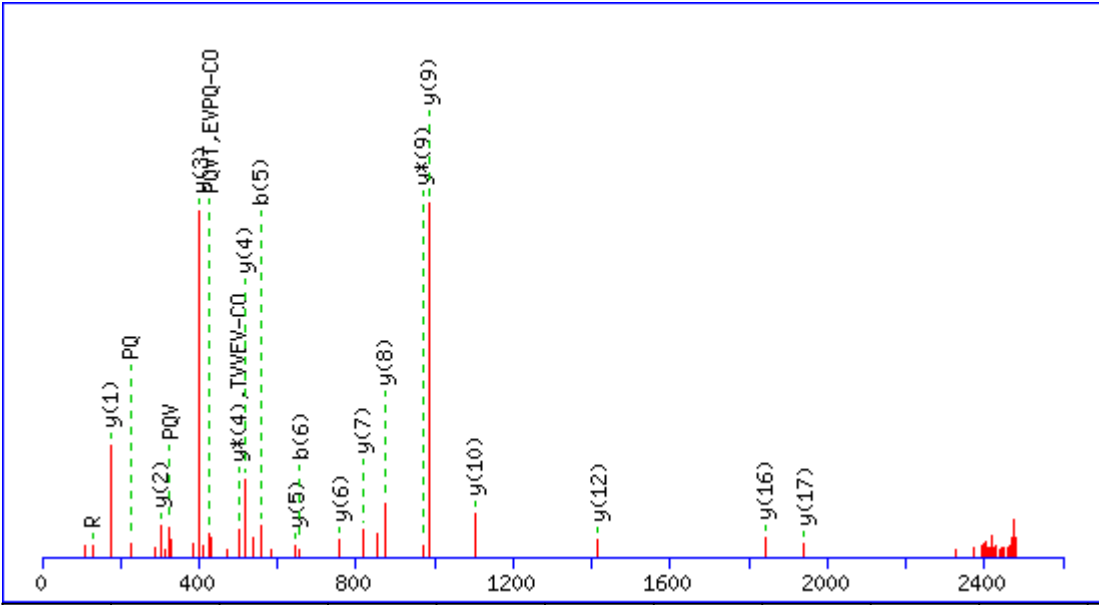

| # | Immon        | a            | a* | a <sup>0</sup> | b            | b* | b <sup>0</sup> | Seq. | v             | w             | w'            | y             | y*            | y <sup>0</sup> | #  |
|---|--------------|--------------|----|----------------|--------------|----|----------------|------|---------------|---------------|---------------|---------------|---------------|----------------|----|
| 1 | 102.05<br>50 | 102.05<br>50 |    | 84.044<br>4    | 130.04<br>99 |    | 112.03<br>93   | E    |               |               |               |               |               |                | 22 |
| 2 | 74.060<br>0  | 203.10<br>26 |    | 185.09<br>21   | 231.09<br>75 |    | 213.08<br>70   | T    | 2323.1<br>929 | 2336.2<br>133 | 2338.1<br>925 | 2369.2<br>347 | 2352.2<br>082 | 2351.2<br>242  | 21 |
| 3 | 72.080<br>8  | 302.17<br>10 |    | 284.16<br>05   | 330.16<br>60 |    | 312.15<br>54   | V    | 2224.1<br>244 | 2237.1<br>448 |               | 2268.1<br>870 | 2251.1<br>605 | 2250.1<br>765  | 20 |
| 4 | 72.080<br>8  | 401.23<br>95 |    | 383.22<br>89   | 429.23<br>44 |    | 411.22<br>38   | V    | 2125.0<br>560 | 2138.0<br>764 |               | 2169.1<br>186 | 2152.0<br>921 | 2151.1<br>081  | 19 |
| 5 | 102.05<br>50 | 530.28<br>21 |    | 512.27<br>15   | 558.27<br>70 |    | 540.26<br>64   | E    | 1996.0<br>134 | 1995.0<br>182 |               | 2070.0<br>502 | 2053.0<br>237 | 2052.0<br>396  | 18 |
| 6 | 72.080<br>8  | 629.35<br>05 |    | 611.33<br>99   | 657.34<br>54 |    | 639.33<br>48   | V    | 1896.9<br>450 | 1909.9<br>654 |               | 1941.0<br>076 | 1923.9<br>811 | 1922.9<br>971  | 17 |
| 7 | 70.065       | 726.40       |    | 708.39         | 754.39       |    | 736.38         | P    | 1799.8        | 1798.8        |               | 1841.9        | 1824.9        | 1823.9         | 16 |

|           |              |               |               |               |               |               |               |          |               |               |               |                       |                      |               |           |
|-----------|--------------|---------------|---------------|---------------|---------------|---------------|---------------|----------|---------------|---------------|---------------|-----------------------|----------------------|---------------|-----------|
|           | 1            | 32            |               | 27            | 81            |               | 76            |          | 923           | 970           |               | <b>392</b>            | 127                  | 286           |           |
| <b>8</b>  | 101.07<br>09 | 854.46<br>18  | 837.43<br>53  | 836.45<br>12  | 882.45<br>67  | 865.43<br>02  | 864.44<br>62  | <b>Q</b> | 1671.8<br>337 | 1670.8<br>384 |               | 1744.8<br>864         | 1727.8<br>599        | 1726.8<br>759 | <b>15</b> |
| <b>9</b>  | 72.080<br>8  | 953.53<br>02  | 936.50<br>37  | 935.51<br>97  | 981.52<br>51  | 964.49<br>86  | 963.51<br>46  | <b>V</b> | 1572.7<br>653 | 1585.7<br>857 |               | 1616.8<br>279         | 1599.8<br>013        | 1598.8<br>173 | <b>14</b> |
| <b>10</b> | 74.060<br>0  | 1054.5<br>779 | 1037.5<br>514 | 1036.5<br>673 | 1082.5<br>728 | 1065.5<br>463 | 1064.5<br>623 | <b>T</b> | 1471.7<br>176 | 1484.7<br>380 | 1486.7<br>172 | 1517.7<br>594         | 1500.7<br>329        | 1499.7<br>489 | <b>13</b> |
| <b>11</b> | 159.09<br>17 | 1240.6<br>572 | 1223.6<br>307 | 1222.6<br>467 | 1268.6<br>521 | 1251.6<br>256 | 1250.6<br>416 | <b>W</b> | 1285.6<br>383 |               |               | <b>1416.7<br/>118</b> | 1399.6<br>852        | 1398.7<br>012 | <b>12</b> |
| <b>12</b> | 102.05<br>50 | 1369.6<br>998 | 1352.6<br>733 | 1351.6<br>892 | 1397.6<br>947 | 1380.6<br>682 | 1379.6<br>842 | <b>E</b> | 1156.5<br>957 | 1155.6<br>004 |               | 1230.6<br>325         | 1213.6<br>059        | 1212.6<br>219 | <b>11</b> |
| <b>13</b> | 88.039<br>3  | 1484.7<br>268 | 1467.7<br>002 | 1466.7<br>162 | 1512.7<br>217 | 1495.6<br>951 | 1494.7<br>111 | <b>D</b> | 1041.5<br>687 | 1040.5<br>735 |               | <b>1101.5<br/>899</b> | 1084.5<br>633        | 1083.5<br>793 | <b>10</b> |
| <b>14</b> | 86.096<br>4  | 1597.8<br>108 | 1580.7<br>843 | 1579.8<br>003 | 1625.8<br>057 | 1608.7<br>792 | 1607.7<br>952 | <b>I</b> | 928.48<br>47  | 941.50<br>51  | 955.52<br>07  | <b>986.56<br/>29</b>  | <b>969.53<br/>64</b> | 968.55<br>24  | <b>9</b>  |
| <b>15</b> | 30.033<br>8  | 1654.8<br>323 | 1637.8<br>057 | 1636.8<br>217 | 1682.8<br>272 | 1665.8<br>006 | 1664.8<br>166 | <b>G</b> |               |               |               | <b>873.47<br/>89</b>  | 856.45<br>23         | 855.46<br>83  | <b>8</b>  |
| <b>16</b> | 30.033<br>8  | 1711.8<br>537 | 1694.8<br>272 | 1693.8<br>432 | 1739.8<br>487 | 1722.8<br>221 | 1721.8<br>381 | <b>G</b> |               |               |               | <b>816.45<br/>74</b>  | 799.43<br>08         | 798.44<br>68  | <b>7</b>  |
| <b>17</b> | 86.096<br>4  | 1824.9<br>378 | 1807.9<br>113 | 1806.9<br>272 | 1852.9<br>327 | 1835.9<br>062 | 1834.9<br>222 | <b>L</b> | 701.35<br>77  | 700.36<br>24  |               | <b>759.43<br/>59</b>  | 742.40<br>94         | 741.42<br>54  | <b>6</b>  |
| <b>18</b> | 102.05<br>50 | 1953.9<br>804 | 1936.9<br>539 | 1935.9<br>698 | 1981.9<br>753 | 1964.9<br>488 | 1963.9<br>648 | <b>E</b> | 572.31<br>51  | 571.31<br>98  |               | <b>646.35<br/>19</b>  | 629.32<br>53         | 628.34<br>13  | <b>5</b>  |
| <b>19</b> | 88.039<br>3  | 2069.0<br>073 | 2051.9<br>808 | 2050.9<br>968 | 2097.0<br>023 | 2079.9<br>757 | 2078.9<br>917 | <b>D</b> | 457.28<br>81  | 456.29<br>29  |               | <b>517.30<br/>93</b>  | <b>500.28<br/>27</b> | 499.29<br>87  | <b>4</b>  |
| <b>20</b> | 72.080<br>8  | 2168.0<br>758 | 2151.0<br>492 | 2150.0<br>652 | 2196.0<br>707 | 2179.0<br>441 | 2178.0<br>601 | <b>V</b> | 358.21<br>97  | 371.24<br>01  |               | <b>402.28<br/>23</b>  | 385.25<br>58         |               | <b>3</b>  |

|           |                            |               |               |               |               |               |               |          |              |              |  |                            |              |  |          |
|-----------|----------------------------|---------------|---------------|---------------|---------------|---------------|---------------|----------|--------------|--------------|--|----------------------------|--------------|--|----------|
| <b>21</b> | 101.10<br>73               | 2296.1<br>707 | 2279.1<br>442 | 2278.1<br>602 | 2324.1<br>656 | 2307.1<br>391 | 2306.1<br>551 | <b>K</b> | 230.12<br>48 | 229.12<br>95 |  | <b>303.21</b><br><b>39</b> | 286.18<br>74 |  | <b>2</b> |
| <b>22</b> | <b>129.11</b><br><b>35</b> |               |               |               |               |               |               | <b>R</b> | 74.023<br>7  | 73.028<br>4  |  | <b>175.11</b><br><b>90</b> | 158.09<br>24 |  | <b>1</b> |

## Part IV: Presentation of PMF spectrum

1 ) Elongation factor 2

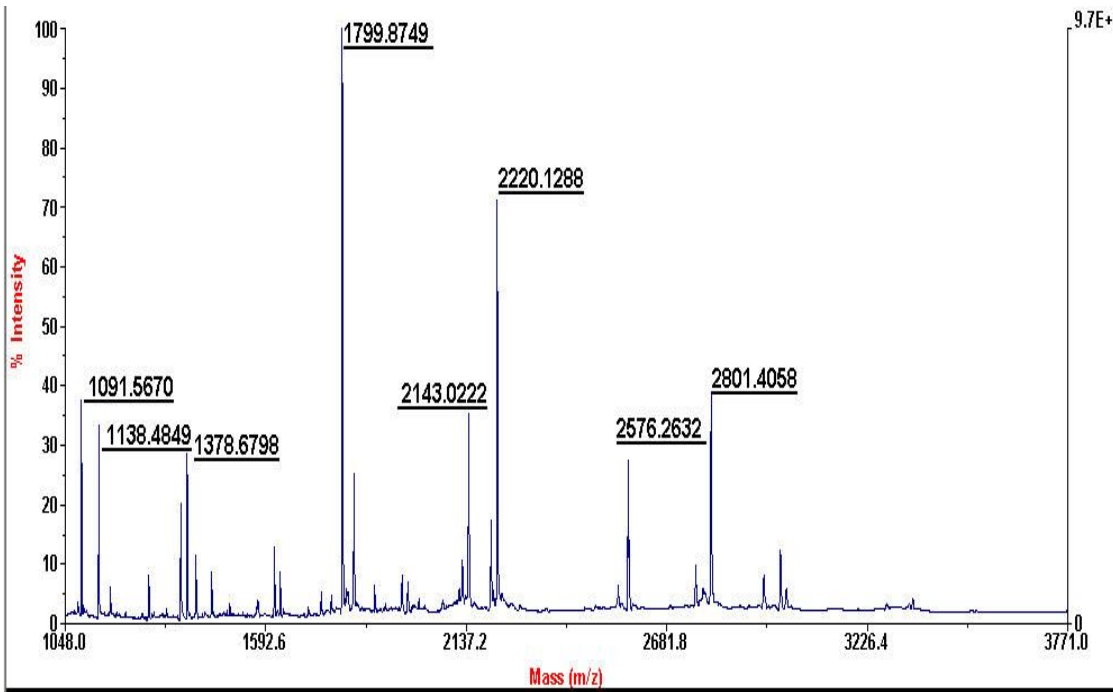

| Start - End | Observed  | Mr(expt)  | Mr(calc)  | Delta   | Miss Sequence                     |
|-------------|-----------|-----------|-----------|---------|-----------------------------------|
| 1 - 9       | 1091.5670 | 1090.5598 | 1090.5771 | -0.0173 | 0 -.VNFTVDQIR.A                   |
| 93 - 119    | 2801.4058 | 2800.3985 | 2800.4031 | -0.0046 | 0 K.DGAGFLINLIDSPGHVDFSSEVTAALR.V |
| 120 - 143   | 2576.2632 | 2575.2559 | 2575.2985 | -0.0426 | 0 R.VTDGALVVVDCVSGVCVQTETVLR.Q    |
| 2           |           |           |           |         |                                   |
| 162 - 179   | 2220.1288 | 2219.1216 | 2219.1473 | -0.0258 | 0 R.ALLELQLEPEELYQTFQR.I          |
| 605 - 624   | 2143.0222 | 2142.0149 | 2142.0705 | -0.0555 | 1 K.ARPFPDGLAEDIDKGEVSAR.Q        |
| 638 - 646   | 1138.4849 | 1137.4776 | 1137.5090 | -0.0314 | 0 K.YEWDVAEAR.K                   |
| 727 - 738   | 1378.6798 | 1377.6725 | 1377.7074 | -0.0349 | 0 R.CLYASVLTAQPR.L                |
| 785 - 800   | 1799.8749 | 1798.8676 | 1798.8889 | -0.0213 | 0 K.AYLPVNESFGFTADLR.S            |



2) Iron-responsive element-binding protein 1

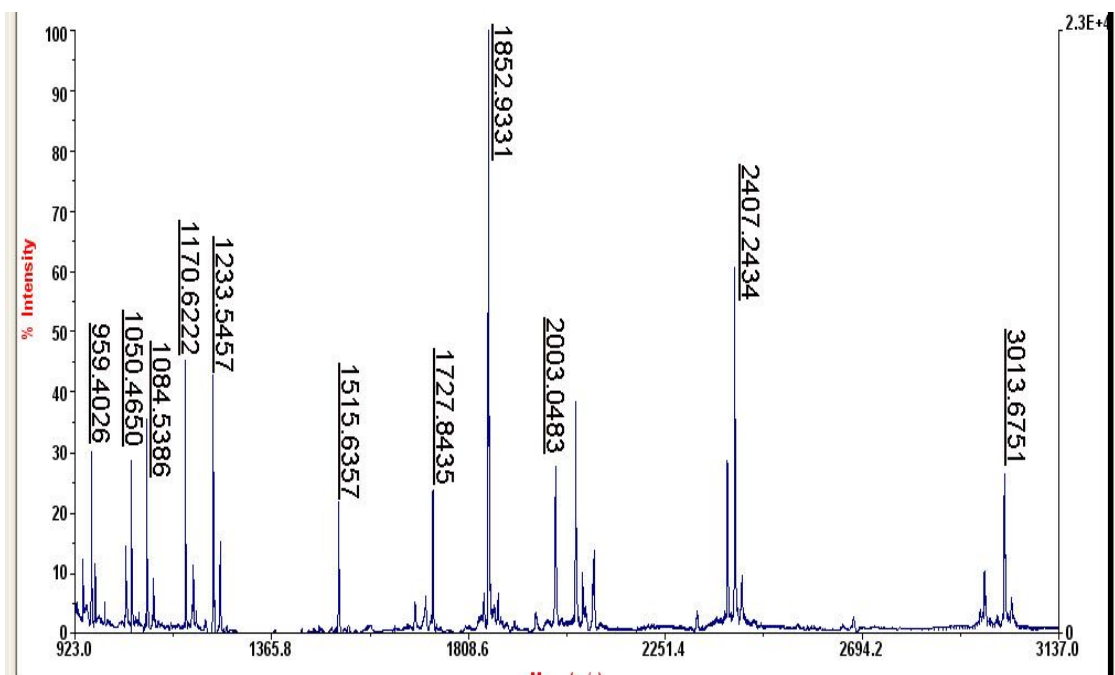

| Start - End | Observed  | Mr(expt)  | Mr(calc)  | Delta   | Miss Sequence                |
|-------------|-----------|-----------|-----------|---------|------------------------------|
| 57 - 72     | 2003.0483 | 2002.0411 | 2002.0384 | 0.0026  | 1 K.KQDIENILHWNVTQHK.N       |
| 73 - 82     | 1170.6222 | 1169.6149 | 1169.6556 | -0.0407 | 0 K.NIEVPFKPAR.V             |
| 142 - 149   | 1050.4650 | 1049.4577 | 1049.4778 | -0.0201 | 0 K.NQDLEFER.N               |
| 159 - 168   | 1233.5457 | 1232.5385 | 1232.5509 | -0.0124 | 0 K.WGSQAFHNMR.I             |
| 277 - 293   | 1852.9331 | 1851.9258 | 1851.9518 | -0.0260 | 0 K.FVEFFGPGVAQLSIADR.A      |
| 336 - 344   | 1084.5386 | 1083.5313 | 1083.5535 | -0.0222 | 0 K.YLQAVGMFR.D              |
| 401 - 413   | 1515.6357 | 1514.6284 | 1514.7014 | -0.0730 | 0 K.GFQVAPHHNDHK.T           |
| 588 - 601   | 1727.8435 | 1726.8363 | 1726.8638 | -0.0276 | 1 K.DIWPTRDEIQAVR.Q          |
| 705 - 712   | 959.4026  | 958.3954  | 958.4144  | -0.0191 | 0 R.EFNSYGSR.R               |
| 737 - 758   | 2407.2434 | 2406.2361 | 2406.2179 | 0.0182  | 0 K.QAPQTIHLPSGEILDVFDAAER.Y |
| 806 - 834   | 3013.6751 | 3012.6678 | 3012.5225 | 0.1453  | 0                            |

R.SNLVGMGVIPLEYLPGENADALGLTGQR.Y

3) Vinculin

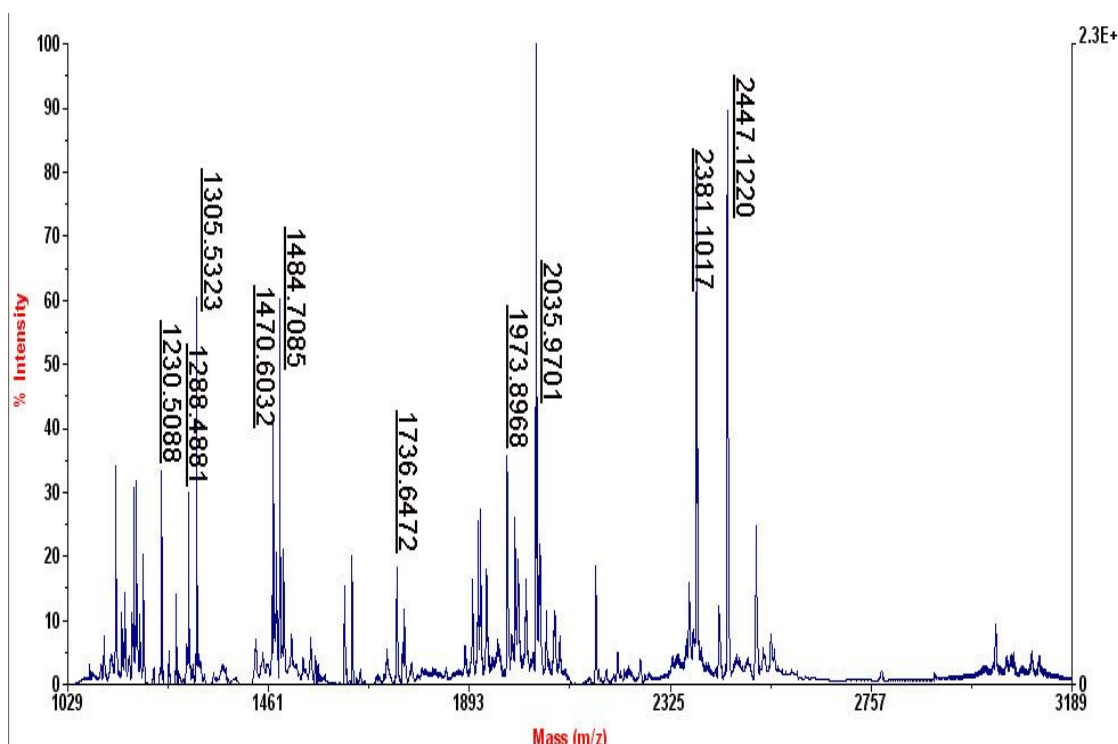

| Start - End   | Observed  | Mr(expt)  | Mr(calc)  | Delta   | Miss Sequence                |
|---------------|-----------|-----------|-----------|---------|------------------------------|
| 87 - 104      | 1973.8968 | 1972.8895 | 1973.0040 | -0.1145 | 0 K.LVQAAQMLQSDPYSVPAR.D     |
| 87 - 104      | 1989.8969 | 1988.8896 | 1988.9989 | -0.1093 | 0 K.LVQAAQMLQSDPYSVPAR.D     |
| Oxidation (M) |           |           |           |         |                              |
| 113 - 131     | 2035.9701 | 2034.9629 | 2035.0473 | -0.0844 | 0 R.GILSGTSDLLLTFDEAEVR.K    |
| 178 - 187     | 1305.5325 | 1304.5252 | 1304.6221 | -0.0970 | 0 R.QQELTHQEHR.V             |
| 285 - 299     | 1470.6032 | 1469.5959 | 1469.6746 | -0.0787 | 0 R.DPSASPGDAGEQAIR.Q        |
| 417 - 427     | 1288.4881 | 1287.4808 | 1287.6129 | -0.1320 | 1 K.IAELCDDPKER.D            |
| 502 - 511     | 1230.5088 | 1229.5016 | 1229.5677 | -0.0661 | 0 R.WIDNPTVDDR.G             |
| 547 - 560     | 1484.7085 | 1483.7012 | 1483.7994 | -0.0982 | 0 R.VDQLTAQLADLAAR.G         |
| 607 - 628     | 2381.1017 | 2380.0945 | 2380.2022 | -0.1077 | 1 K.LLAVAATAPPDAPNREEVFDER.A |
| 684 - 698     | 1736.6472 | 1735.6399 | 1735.7624 | -0.1225 | 0 R.NPGNQAAIEHFETMK.N        |
| 832 - 852     | 2447.1220 | 2446.1148 | 2446.1804 | -0.0657 | 0 R.EAFQPQEPDFPPPPDLEQLR.L   |
| 1046 - 1054   | 1132.4917 | 1131.4844 | 1131.5706 | -0.0862 | 0 R.TNLLQVCER.I              |

No match to: 927.4225, 1639.7833

4) Neutral alpha-glucosidase AB precursor

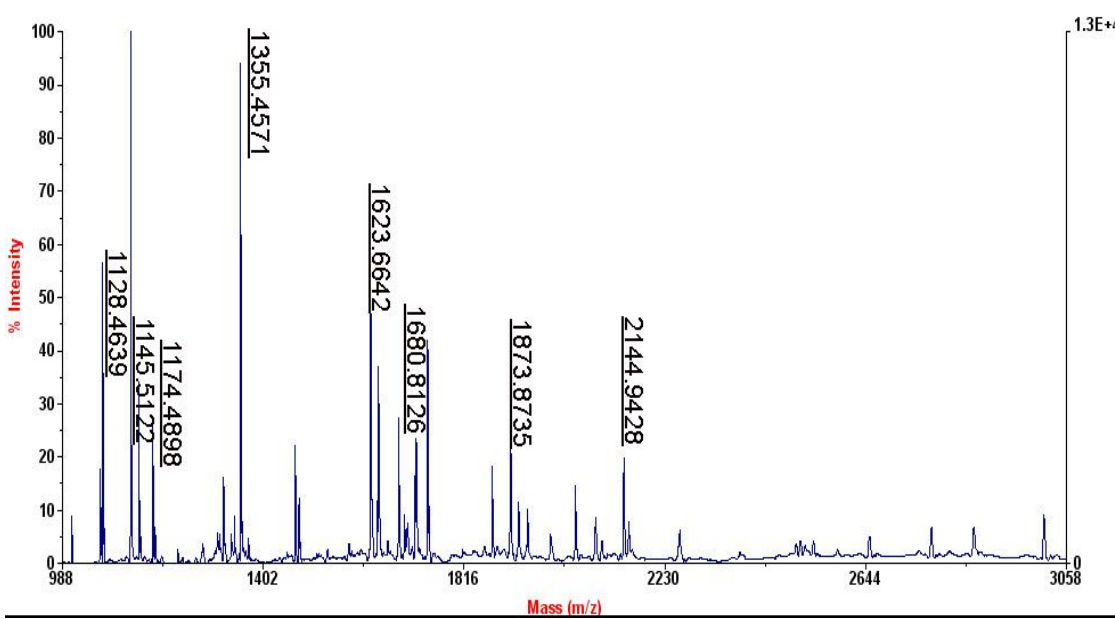

| Start - End | Observed  | Mr(expt)  | Mr(calc)  | Delta   | Miss Sequence             |
|-------------|-----------|-----------|-----------|---------|---------------------------|
| 36 - 48     | 1623.6642 | 1622.6570 | 1622.6705 | -0.0135 | 1 R.SNFKTCEESSFCK.R 2     |
| 52 - 61     | 1145.5122 | 1144.5049 | 1144.6353 | -0.1303 | 0 R.SIRPGLSPYR.A          |
| 101 - 109   | 1174.4898 | 1173.4825 | 1173.6142 | -0.1317 | 1 R.FRIDELEPR.R           |
| 113 - 127   | 1680.8126 | 1679.8053 | 1679.9358 | -0.1305 | 1 R.YRVPDVLVADPPIAR.L     |
| 174 - 182   | 1128.4639 | 1127.4566 | 1127.5723 | -0.1157 | 0 R.GLLEFEHQR.A           |
| 438 - 445   | 1071.3772 | 1070.3700 | 1070.4821 | -0.1122 | 0 R.YFTWDPSR.F            |
| 559 - 569   | 1355.4571 | 1354.4498 | 1354.5803 | -0.1305 | 0 K.DAQHYGGWEHR.D         |
| 570 - 588   | 2144.9428 | 2143.9356 | 2144.0472 | -0.1117 | 0 R.DVHNIYGLYVHMATADGLR.Q |
| 684 - 698   | 1873.8735 | 1872.8662 | 1872.9958 | -0.1297 | 1 R.REPWLLPSQHNDIIR.D     |
| 915 - 929   | 1740.7860 | 1739.7787 | 1739.9206 | -0.1419 | 0 R.LSFQHPETSVLVLR.K      |

No match to: 927.3888, 960.4500, 1639.7869, 1714.6822, 1910.8136

5) Chromobox protein homolog 5

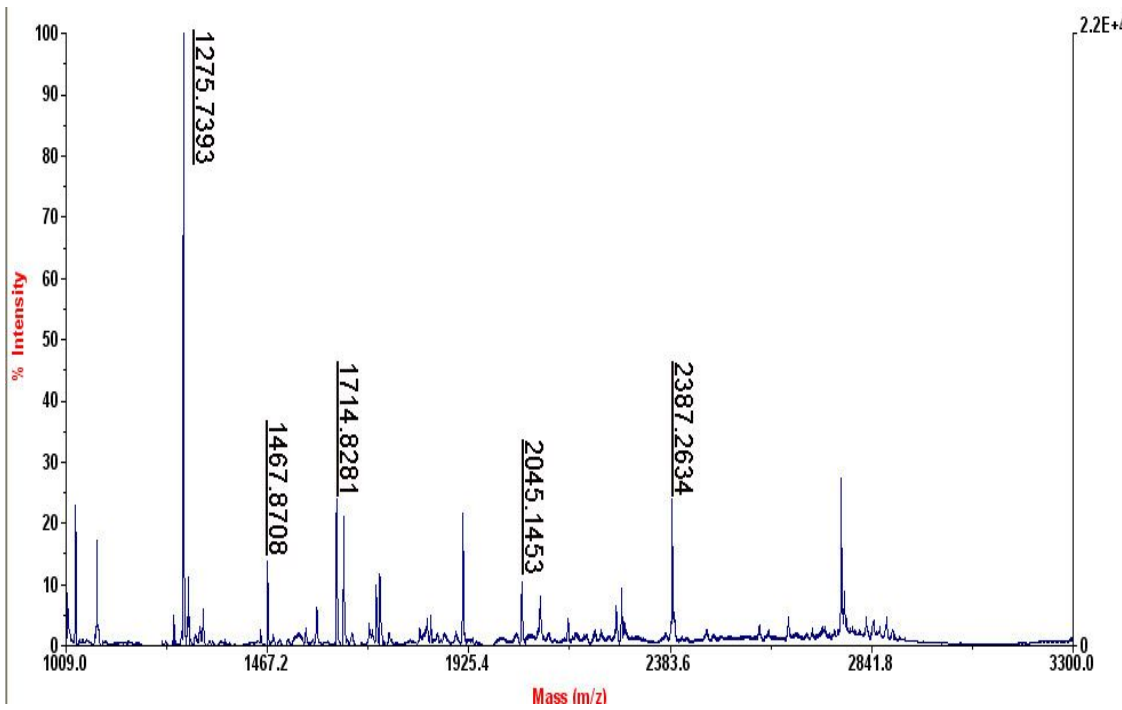

| Start - End | Observed  | Mr(expt)  | Mr(calc)  | Delta   | Miss Sequence              |
|-------------|-----------|-----------|-----------|---------|----------------------------|
| 8 - 28      | 2387.2634 | 2386.2562 | 2386.0659 | 0.1903  | 1 R.TADSSSEDEEEYVVEKVLDR.R |
| 30 - 40     | 1275.7393 | 1274.7320 | 1274.7597 | -0.0277 | 1 R.VVKGQVEYLLK.W          |
| 126 - 141   | 1714.8281 | 1713.8209 | 1713.8139 | 0.0069  | 0 K.IIGATDSCGDLMLMK.W      |
| 126 - 143   | 2045.1453 | 2044.1380 | 2043.9831 | 0.1549  | 1 K.IIGATDSCGDLMLMKWK.D    |

Oxidation (M)

|           |           |           |           |        |                    |
|-----------|-----------|-----------|-----------|--------|--------------------|
| 160 - 171 | 1467.8708 | 1466.8635 | 1466.7227 | 0.1407 | 0 K.CPQIVIAFYEER.L |
|-----------|-----------|-----------|-----------|--------|--------------------|

No match to: 927.4930, 960.5775, 998.5335, 1030.5621, 1078.5164, 1623.8529, 1639.9163, 1722.8988, 1911.0120, 2771.5753

6) Heat shock protein HSP 90-alpha

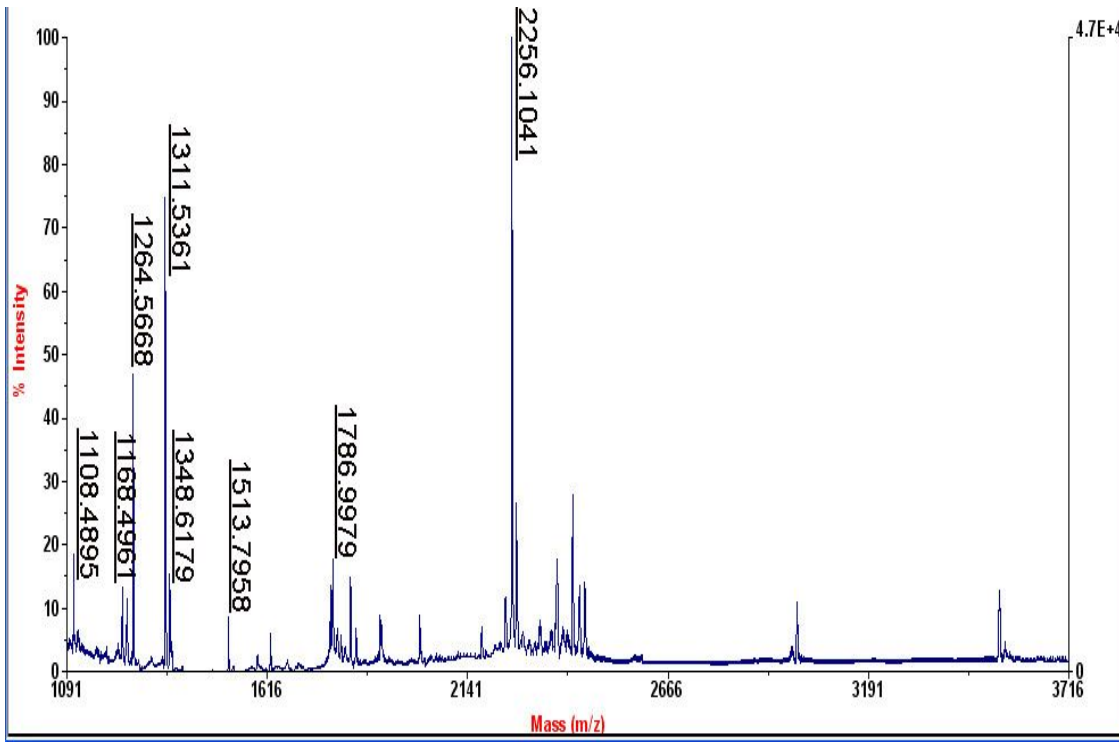

| Start - End | Observed  | Mr(expt)  | Mr(calc)  | Delta   | Miss Sequence                  |
|-------------|-----------|-----------|-----------|---------|--------------------------------|
| 154 - 173   | 2256.1041 | 2255.0968 | 2254.9515 | 0.1453  | 0 K.HNDDEQYAWESSAGGSFTVR.T     |
| 192 - 201   | 1311.5361 | 1310.5289 | 1310.5626 | -0.0338 | 0 K.EDQTEYLEER.R               |
| 346 - 355   | 1264.5668 | 1263.5595 | 1263.6360 | -0.0765 | 1 R.RAPFDLFENR.K               |
| 347 - 355   | 1108.4895 | 1107.4822 | 1107.5349 | -0.0527 | 0 R.APFDLFENR.K                |
| 387 - 400   | 1513.7958 | 1512.7885 | 1512.7783 | 0.0102  | 0 R.GVVDSIDLPLNISR.E           |
| 447 - 456   | 1168.4961 | 1167.4888 | 1167.5632 | -0.0744 | 0 K.LGIHEDSQNR.K               |
| 500 - 510   | 1235.5470 | 1234.5397 | 1234.5942 | -0.0544 | 0 K.DQVANSFVER.L               |
| 621 - 632   | 1348.6179 | 1347.6106 | 1347.5798 | 0.0308  | 1 R.DNSTMGYMAAKK.H 2 Oxidation |
| (M)         |           |           |           |         |                                |
| 633 - 647   | 1786.9979 | 1785.9907 | 1785.9373 | 0.0534  | 0 K.HLEINPDHSIIETLR.Q          |

No match to: 1782.9945, 1911.0963, 2177.1023

### 7) Protein-glutamine gamma-glutamyltransferase 2

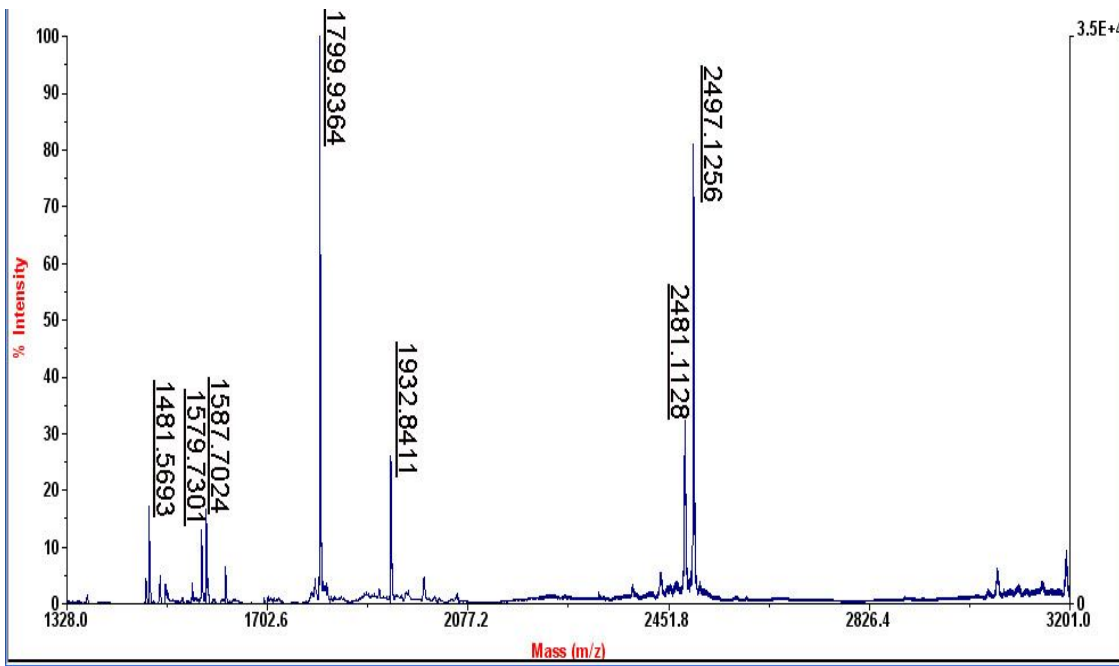

| Start - End | Observed  | Mr(expt)  | Mr(calc)  | Delta   | Miss Sequence                |
|-------------|-----------|-----------|-----------|---------|------------------------------|
| 36 - 48     | 1587.7024 | 1586.6951 | 1586.7993 | -0.1042 | 0 R.GQPFWLTLHFEGR.N          |
| 223 - 240   | 1932.8411 | 1931.8338 | 1931.9192 | -0.0854 | 0 R.VVSGMVNCNDDQGVLLGR.W     |
| 241 - 262   | 2481.1128 | 2480.1056 | 2480.1430 | -0.0374 | 0 R.WDNNYGDGVSPMSWIGSVDILR.R |
| 241 - 262   | 2497.1256 | 2496.1183 | 2496.1379 | -0.0196 | 0 R.WDNNYGDGVSPMSWIGSVDILR.R |

Oxidation (M)

|           |           |           |           |         |                        |
|-----------|-----------|-----------|-----------|---------|------------------------|
| 365 - 377 | 1481.5693 | 1480.5620 | 1480.6438 | -0.0818 | 0 K.SEGTYCCGPVVR.A 2   |
| 528 - 540 | 1579.7301 | 1578.7228 | 1578.8293 | -0.1065 | 0 K.YLLNLNLEPFSEK.S    |
| 551 - 562 | 1511.6695 | 1510.6622 | 1510.7449 | -0.0827 | 1 K.YRDCLTESNLIK.V     |
| 565 - 580 | 1799.9364 | 1798.9291 | 1799.0192 | -0.0901 | 0 R.ALLVEPVINSYLLAER.D |

No match to: 1000.4327, 1623.7011, 1993.8471

8) Serotransferrin precursor

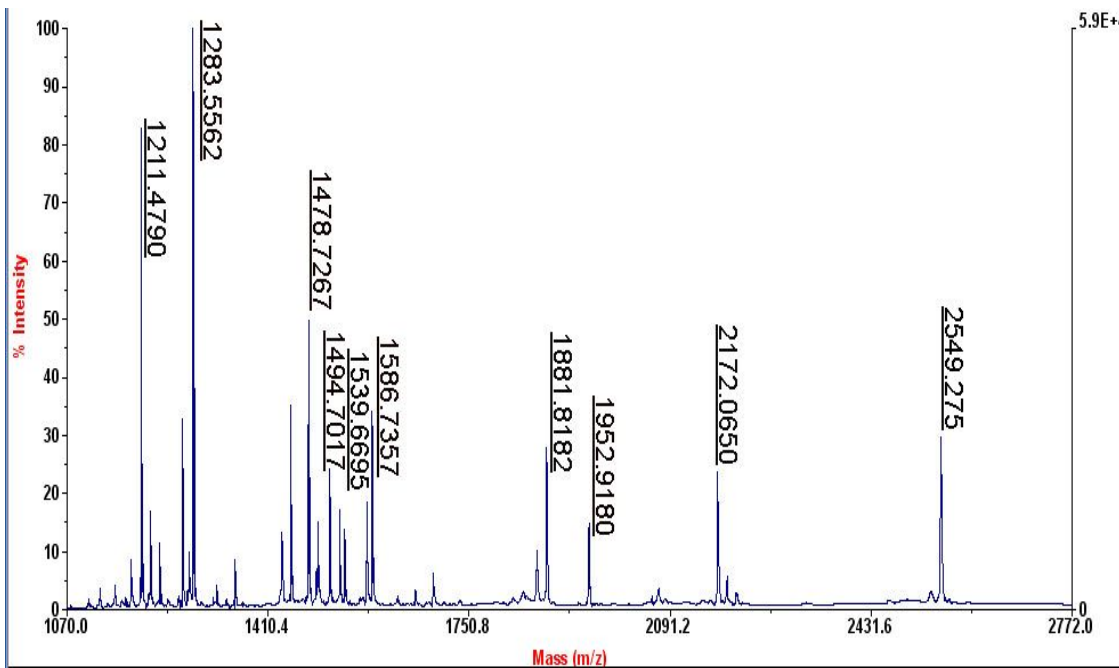

| Start - End | Observed  | Mr(expt)  | Mr(calc)  | Delta   | Miss Sequence                    |
|-------------|-----------|-----------|-----------|---------|----------------------------------|
| 27 - 42     | 1881.8182 | 1880.8109 | 1880.8297 | -0.0188 | 1 R.WCAVSEHEATKCQSF.R.D          |
| 123 - 132   | 1211.4790 | 1210.4717 | 1210.5400 | -0.0683 | 0 K.DSGFQMNQLR.G Oxidation (M)   |
| 144 - 162   | 2171.0650 | 2170.0578 | 2170.0881 | -0.0303 | 0 R.SAGWNIPIGLLYCDLPEPR.K        |
| 240 - 251   | 1539.6695 | 1538.6622 | 1538.7035 | -0.0413 | 0 R.DQYELLCLDNTR.K               |
| 252 - 273   | 2549.2753 | 2548.2680 | 2548.2856 | -0.0176 | 1 R.KPVDEYKDCHLAQVPSHTVVAR.S     |
| 332 - 343   | 1478.7267 | 1477.7194 | 1477.7275 | -0.0081 | 0 K.MYLGYEYVTAIR.N               |
| 332 - 343   | 1494.7017 | 1493.6944 | 1493.7224 | -0.0280 | 0 K.MYLGYEYVTAIR.N Oxidation (M) |
| 363 - 371   | 1195.5088 | 1194.5015 | 1194.5352 | -0.0337 | 0 K.WCALSHHER.L                  |
| 495 - 508   | 1577.6446 | 1576.6373 | 1576.6503 | -0.0130 | 0 R.FDEFFSEGCAPGSK.K             |
| 531 - 541   | 1283.5562 | 1282.5489 | 1282.5618 | -0.0128 | 0 K.EGYGYTGAFR.C                 |
| 572 - 587   | 1952.9180 | 1951.9107 | 1951.9309 | -0.0202 | 1 K.NLNEKDYELLCLDGTR.K           |
| 588 - 600   | 1586.7357 | 1585.7284 | 1585.7671 | -0.0387 | 0 R.KPVEEYANCHLAR.A              |
| 684 - 696   | 1531.6387 | 1530.6314 | 1530.6806 | -0.0493 | 0 K.CSTSSLLEACTFR.R 2            |

No match to: 1265.5383, 1448.6324, 1514.6284

### 9) Complement C3 precursor

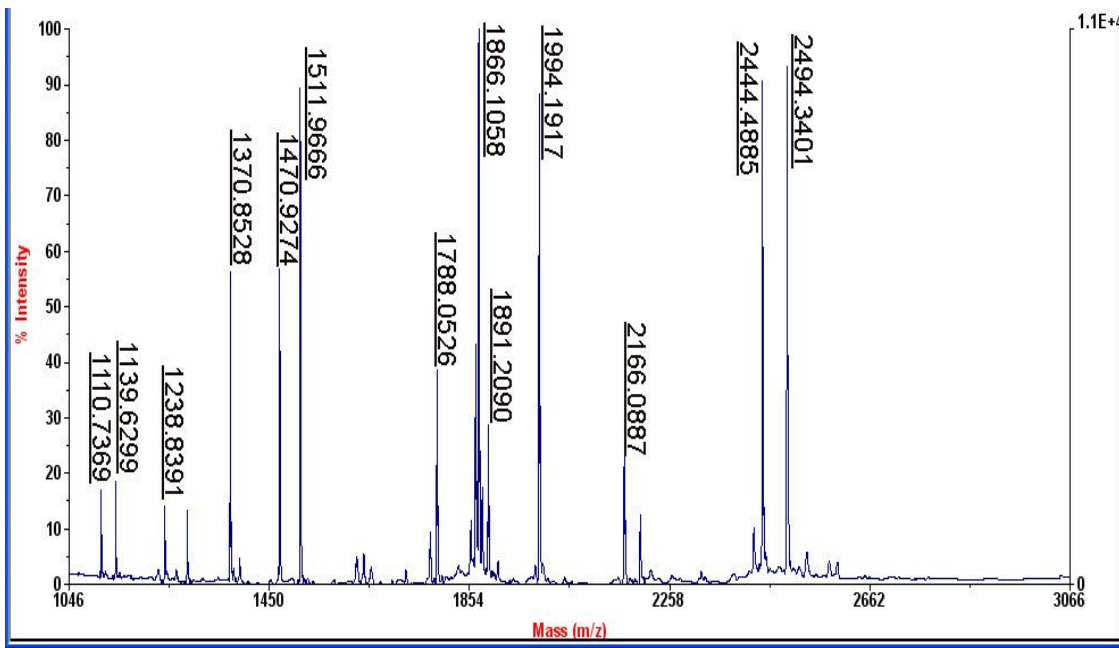

| Start - End | Observed  | Mr(expt)  | Mr(calc)  | Delta  | Miss Sequence                 |
|-------------|-----------|-----------|-----------|--------|-------------------------------|
| 137 - 148   | 1370.8528 | 1369.8455 | 1369.7241 | 0.1214 | 0 K.TIYTPGSTVLYR.I            |
| 208 - 225   | 2166.0887 | 2165.0814 | 2164.9952 | 0.0862 | 0 R.AYYENSPQQVFSTEFVK.E       |
| 242 - 249   | 1139.6299 | 1138.6226 | 1138.5335 | 0.0891 | 0 K.FYIYNEK.G                 |
| 264 - 281   | 1994.1917 | 1993.1844 | 1993.0268 | 0.1576 | 1 K.KVEGTAFVIFGIQDGEQR.I      |
| 265 - 281   | 1866.1058 | 1865.0986 | 1864.9318 | 0.1667 | 0 K.VEGTAFVIFGIQDGEQR.I       |
| 291 - 304   | 1470.9274 | 1469.9201 | 1469.7725 | 0.1476 | 0 R.IPIEDGSGEVLSR.K           |
| 305 - 315   | 1238.8391 | 1237.8318 | 1237.7142 | 0.1176 | 1 R.KVLLDGVQNP.R.A            |
| 306 - 315   | 1110.7369 | 1109.7297 | 1109.6193 | 0.1104 | 0 K.VLLDGVQNP.R.A             |
| 344 - 359   | 1788.0526 | 1787.0453 | 1786.9617 | 0.0836 | 0 R.SGIPIVTSPYQIHFTK.T        |
| 409 - 425   | 1891.2090 | 1890.2017 | 1890.0687 | 0.1331 | 0 K.LSINTHPSQKPLSITVR.T       |
| 463 - 478   | 1872.1579 | 1871.1506 | 1871.0264 | 0.1241 | 0 R.TELRPGETLVNFFLR.M         |
| 509 - 530   | 2444.4885 | 2443.4812 | 2443.2998 | 0.1814 | 0 R.EPGQDLVVLPLSITTDGFPSFR.L  |
| 531 - 544   | 1511.9666 | 1510.9594 | 1510.8143 | 0.1451 | 0 R.LVAYYTLIGASQR.E           |
| 634 - 657   | 2494.3401 | 2493.3329 | 2493.1407 | 0.1921 | 0 K.DYAGVFSDAGLTFTSSSGQQAQR.A |
| 1321 - 1337 | 1855.9711 | 1854.9638 | 1854.8482 | 0.1155 | 1 R.SEETKENEGFTVTAEGK.G       |

No match to: 1283.7769, 1774.0859



10) WD repeat protein 1

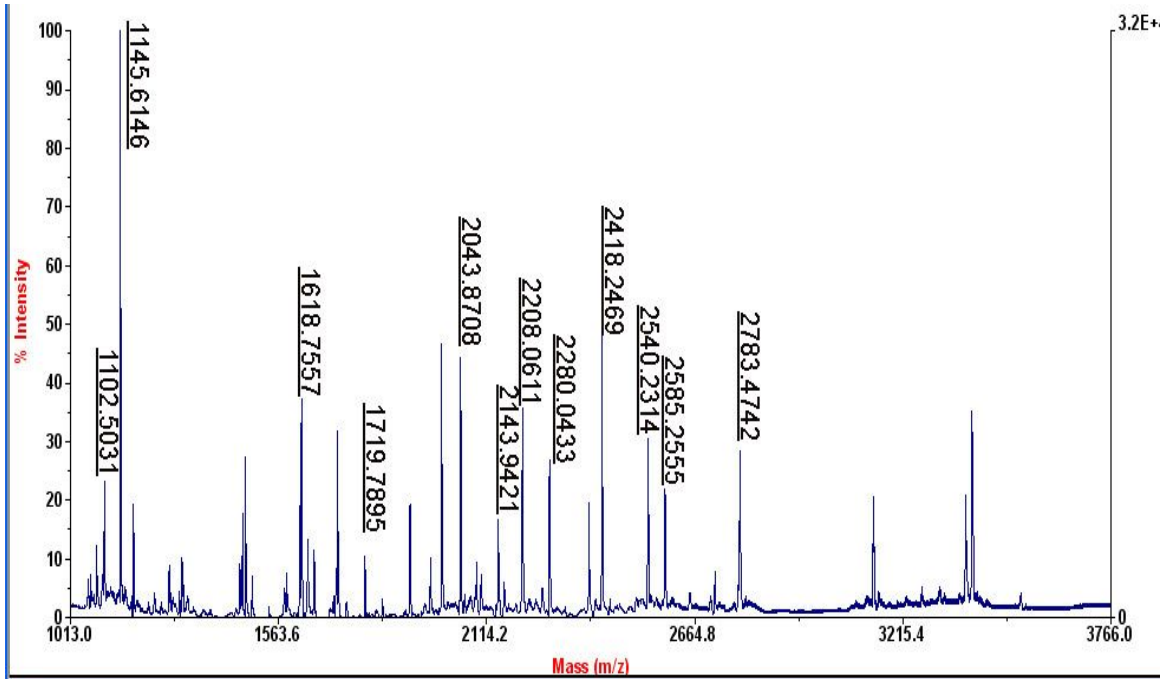

| Start - End                           | Observed  | Mr(expt)  | Mr(calc)  | Delta   | Miss Sequence                |
|---------------------------------------|-----------|-----------|-----------|---------|------------------------------|
| 8 - 17                                | 1145.6146 | 1144.6073 | 1144.6240 | -0.0167 | 0 K.VFASLPQVER.G             |
| 44 - 65                               | 2418.2469 | 2417.2396 | 2417.2339 | 0.0057  | 0 R.NIDNPALADIYTEHAHQVVVAK.Y |
| 66 - 81                               | 1618.7557 | 1617.7485 | 1617.7674 | -0.0189 | 0 K.YAPSGFYIASGDVSGK.L       |
| 96 - 104                              | 1102.5031 | 1101.4958 | 1101.5131 | -0.0173 | 0 K.YEYQPFAGK.I              |
| 127 - 147                             | 2208.0611 | 2207.0538 | 2207.0646 | -0.0108 | 0 K.FGAVFLWDSGSSVGEITGHNK.V  |
| 162 - 180                             | 2043.8708 | 2042.8635 | 2042.9043 | -0.0408 | 0 R.LATGSDDNCAAFFEGPPFK.F    |
| 204 - 219                             | 1719.7895 | 1718.7822 | 1718.8151 | -0.0329 | 0 R.FATASADGQIYIYD GK.T      |
| 232 - 256                             | 2585.2555 | 2584.2483 | 2584.2193 | 0.0289  | 0                            |
| <b>K.AHDGGIYAIWSWSPDSTHLLSASGDK.T</b> |           |           |           |         |                              |
| 371 - 389                             | 2143.9421 | 2142.9349 | 2142.9231 | 0.0117  | 0 R.MTVDESGQLISCSMDDTVR.Y    |
| 490 - 511                             | 2280.0433 | 2279.0360 | 2279.0528 | -0.0168 | 0 K.GPVTDVAYSHDGAFLAVCDASK.V |
| 512 - 534                             | 2540.2314 | 2539.2241 | 2539.2131 | 0.0110  | 0 K.VVTVFSVADGYSENNVFGHHAK.I |
| 576 - 600                             | 2783.4742 | 2782.4670 | 2782.4038 | 0.0632  | 0                            |
| <b>R.LHHVSSLAWLDEHTLVTTSHDASVK.E</b>  |           |           |           |         |                              |

No match to: 909.0530, 927.4831, 1179.5894, 1307.6612, 1467.8058, 1475.7335, 1623.7880, 1639.8635, 1791.6941, 1910.9125, 1993.9741, 2383.9698

11) Bifunctional purine biosynthesis protein PURH

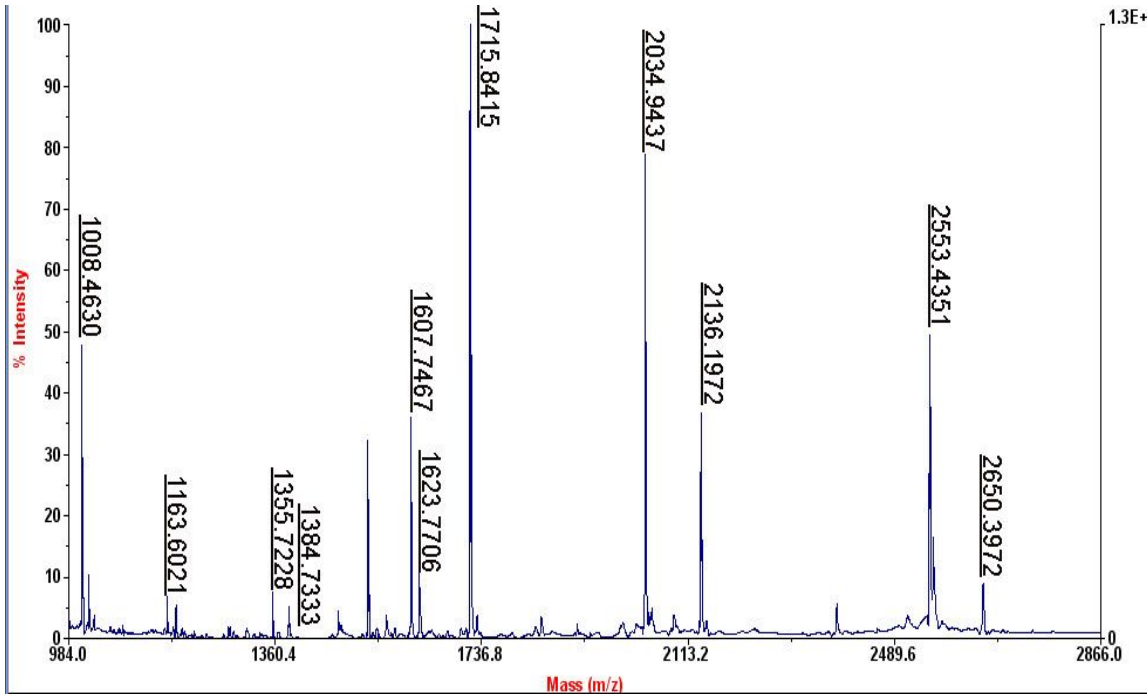

| Start - End                   | Observed  | Mr(expt)  | Mr(calc)  | Delta   | Miss Sequence                   |
|-------------------------------|-----------|-----------|-----------|---------|---------------------------------|
| 50 - 64                       | 1607.7467 | 1606.7395 | 1606.7660 | -0.0266 | 0 R.DVSELTGFPEMLGGR.V           |
| 50 - 64                       | 1623.7706 | 1622.7633 | 1622.7610 | 0.0024  | 0 R.DVSELTGFPEMLGGR.V Oxidation |
| (M)                           |           |           |           |         |                                 |
| 67 - 79                       | 1355.7228 | 1354.7155 | 1354.7833 | -0.0678 | 0 K.TLHPAVHAGILAR.N             |
| 109 - 133                     | 2553.4351 | 2552.4278 | 2552.3696 | 0.0582  | 0                               |
| K.TVASPGVTVEEAVEQIDIGGVTLRL.A |           |           |           |         |                                 |
| 178 - 194                     | 2034.9437 | 2033.9364 | 2033.9119 | 0.0245  | 0 K.AFTHTAQYDEAISDYFR.K         |
| 295 - 305                     | 1163.6021 | 1162.5949 | 1162.6346 | -0.0397 | 0 K.TLTPISAAYAR.A               |
| 438 - 451                     | 1384.7333 | 1383.7261 | 1383.7218 | 0.0043  | 0 K.NGQVIGIGAGQQR.I             |
| 462 - 468                     | 1008.4630 | 1007.4557 | 1007.4977 | -0.0420 | 0 K.ANYWWLR.H                   |
| 484 - 507                     | 2650.3972 | 2649.3899 | 2649.3133 | 0.0767  | 1 K.RAEISNAIDQYVTGTIGEDDLIK.W   |
| 531 - 545                     | 1715.8415 | 1714.8343 | 1714.8566 | -0.0223 | 0 K.LTEVSISSDAFFPFR.D           |
| 570 - 588                     | 2136.1972 | 2135.1899 | 2135.1408 | 0.0491  | 0 K.VVIEACDELGILAHNTNLR.L       |

No match to: 909.3013, 1475.7153, 1529.7265, 2560.1923

12) Pyruvate kinase isozymes M1/M2

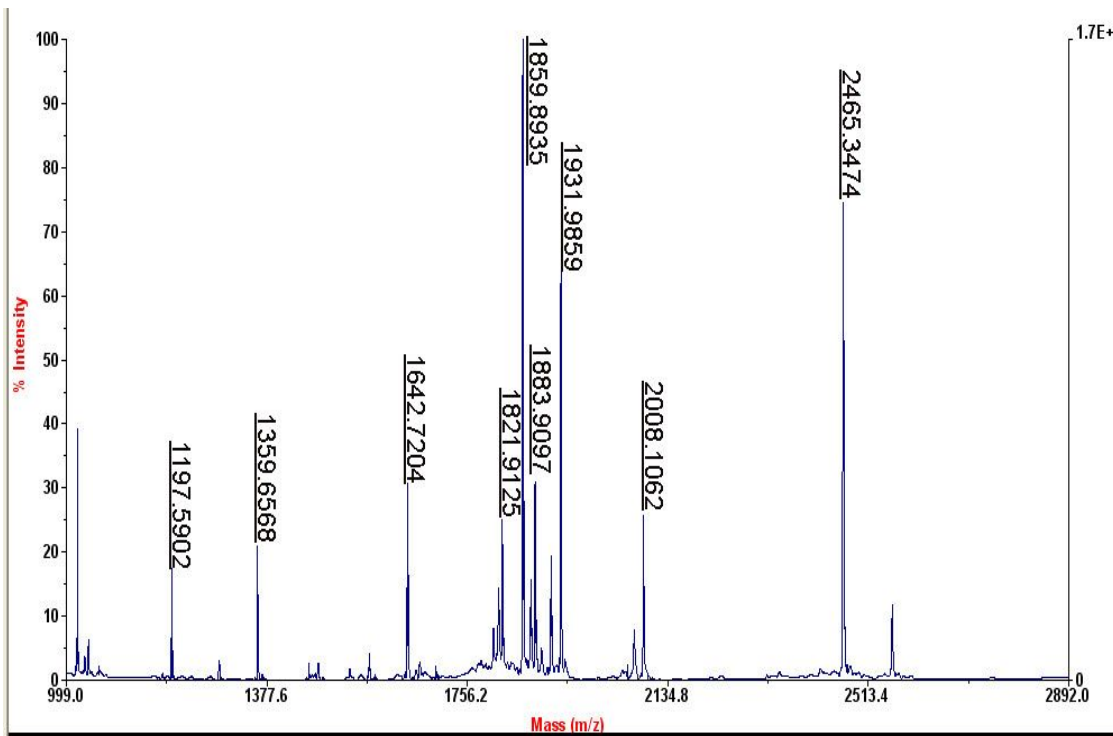

| Start - End | Observed  | Mr(expt)  | Mr(calc)  | Delta   | Miss Sequence                   |
|-------------|-----------|-----------|-----------|---------|---------------------------------|
| 44 - 56     | 1359.6568 | 1358.6496 | 1358.6976 | -0.0480 | 0 R.NTGIICTIGPASR.S             |
| 74 - 89     | 1883.9097 | 1882.9024 | 1882.8962 | 0.0062  | 0 R.LNFSGTHEYHAETIK.N           |
| 93 - 115    | 2465.3474 | 2464.3401 | 2464.2849 | 0.0552  | 0 R.TATESFASDPILYRPVAVALDTK.G   |
| 142 - 151   | 1197.5902 | 1196.5829 | 1196.5747 | 0.0082  | 0 K.ITLDNAYMEK.C                |
| 231 - 246   | 1859.8935 | 1858.8863 | 1858.8923 | -0.0060 | 0 K.FGVEQDVMVFASFIR.K           |
| 231 - 246   | 1875.8567 | 1874.8495 | 1874.8872 | -0.0377 | 0 K.FGVEQDVMVFASFIR.K Oxidation |

(M)

|           |           |           |           |         |                         |
|-----------|-----------|-----------|-----------|---------|-------------------------|
| 271 - 278 | 953.4430  | 952.4357  | 952.4726  | -0.0369 | 0 K.IENHEGVR.R          |
| 279 - 294 | 1821.9125 | 1820.9053 | 1820.9090 | -0.0037 | 1 R.RFDEILEASDGIMVAR.G  |
| 368 - 376 | 1019.4767 | 1018.4694 | 1018.5083 | -0.0389 | 0 K.GDYPLEAVR.M         |
| 384 - 399 | 1931.9859 | 1930.9786 | 1930.9788 | -0.0002 | 0 R.EAEAAIYHLQLFEELR.R  |
| 384 - 400 | 2088.1062 | 2087.0990 | 2087.0799 | 0.0191  | 1 R.EAEAAIYHLQLFEELRR.L |
| 476 - 489 | 1642.7204 | 1641.7131 | 1641.7634 | -0.0503 | 0 K.DPVQEAWAEDVDLR.V    |

No match to: 1913.9643

13) Apolipoprotein A-I precursor

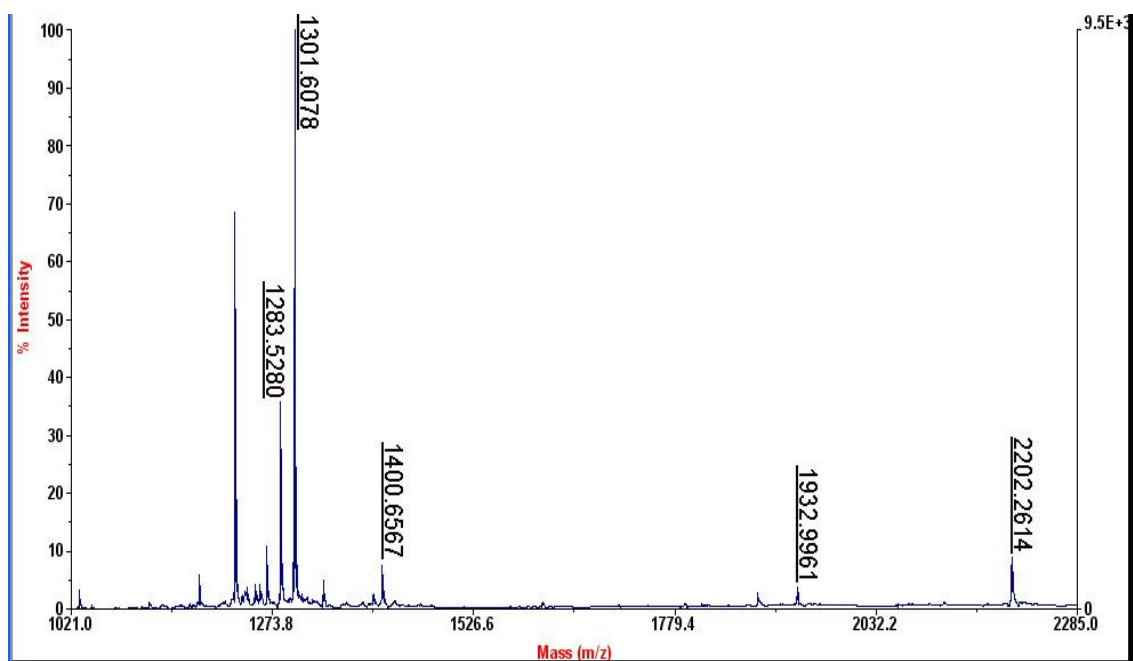

| Start - End | Observed  | Mr(expt)  | Mr(calc)  | Delta   | Miss Sequence             |
|-------------|-----------|-----------|-----------|---------|---------------------------|
| 52 - 64     | 1400.6567 | 1399.6494 | 1399.6619 | -0.0125 | 0 R.DYVSQFEGSALGK.Q       |
| 84 - 101    | 2202.2614 | 2201.2541 | 2201.1116 | 0.1425  | 1 K.LREQQLGPVTQEFWDNLEK.E |
| 86 - 101    | 1932.9961 | 1931.9888 | 1931.9265 | 0.0624  | 0 R.EQLGPVTQEFWDNLEK.E    |
| 131 - 140   | 1411.6451 | 1410.6378 | 1410.6601 | -0.0223 | 1 K.KWQEEMELYR.Q          |
| 132 - 140   | 1283.5280 | 1282.5207 | 1282.5652 | -0.0445 | 0 K.WQEEMELYR.Q           |
| 185 - 195   | 1301.6078 | 1300.6005 | 1300.6411 | -0.0406 | 0 R.THLAPYSDEL.R.Q        |

No match to: 1226.4871, 1266.5214, 1337.7339

14) Hemoglobin subunit beta

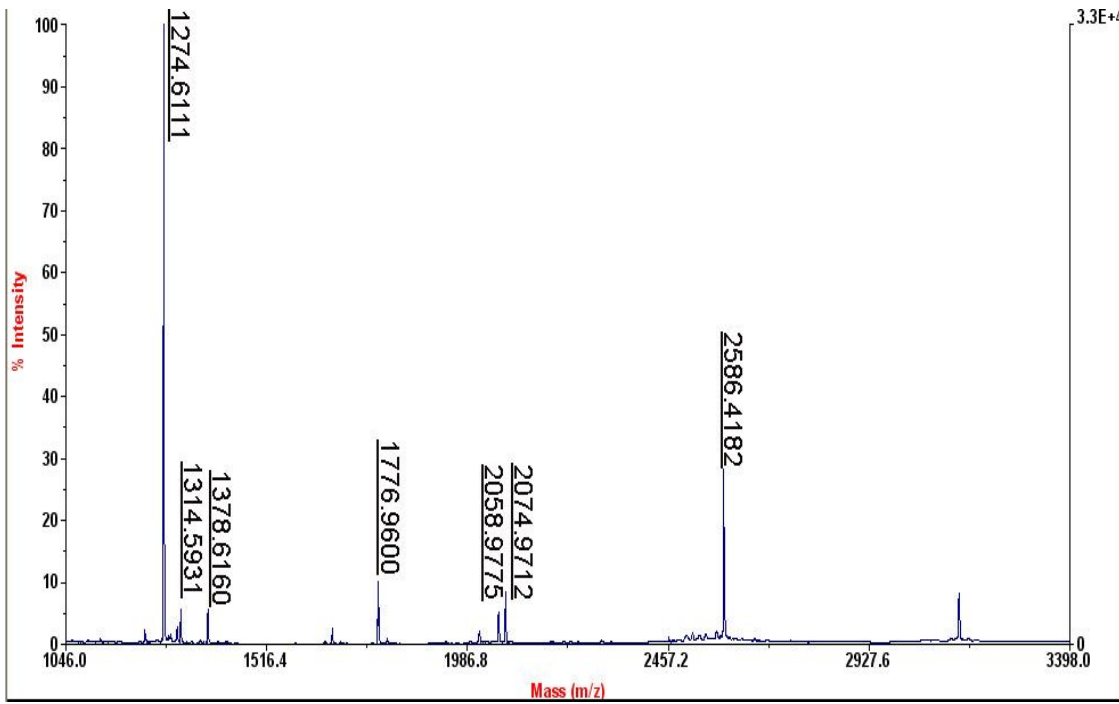

| Start - End   | Observed  | Mr(expt)  | Mr(calc)  | Delta   | Miss Sequence                |
|---------------|-----------|-----------|-----------|---------|------------------------------|
| 19 - 31       | 1314.5931 | 1313.5858 | 1313.6575 | -0.0716 | 0 K.VNVDEVGGEALGR.L          |
| 32 - 41       | 1274.6111 | 1273.6039 | 1273.7183 | -0.1144 | 0 R.LLVVYPWTQR.F             |
| 42 - 60       | 2058.9775 | 2057.9702 | 2057.9404 | 0.0299  | 0 R.FFESFGDLSTPDAVMGNPK.V    |
| 42 - 60       | 2074.9712 | 2073.9639 | 2073.9353 | 0.0286  | 0 R.FFESFGDLSTPDAVMGNPK.V    |
| Oxidation (M) |           |           |           |         |                              |
| 84 - 105      | 2586.4182 | 2585.4110 | 2585.2332 | 0.1778  | 1 K.GTFATLSELHCDKLHVDPENFR.L |
| 106 - 121     | 1776.9600 | 1775.9527 | 1775.9868 | -0.0341 | 0 R.LLGNVLCVLAHHFGK.E        |
| 122 - 133     | 1378.6160 | 1377.6087 | 1377.6928 | -0.0841 | 0 K.EFTPPVQAAYQK.V           |

No match to: 2585.3451, 3137.1133

15) Ubiquitin

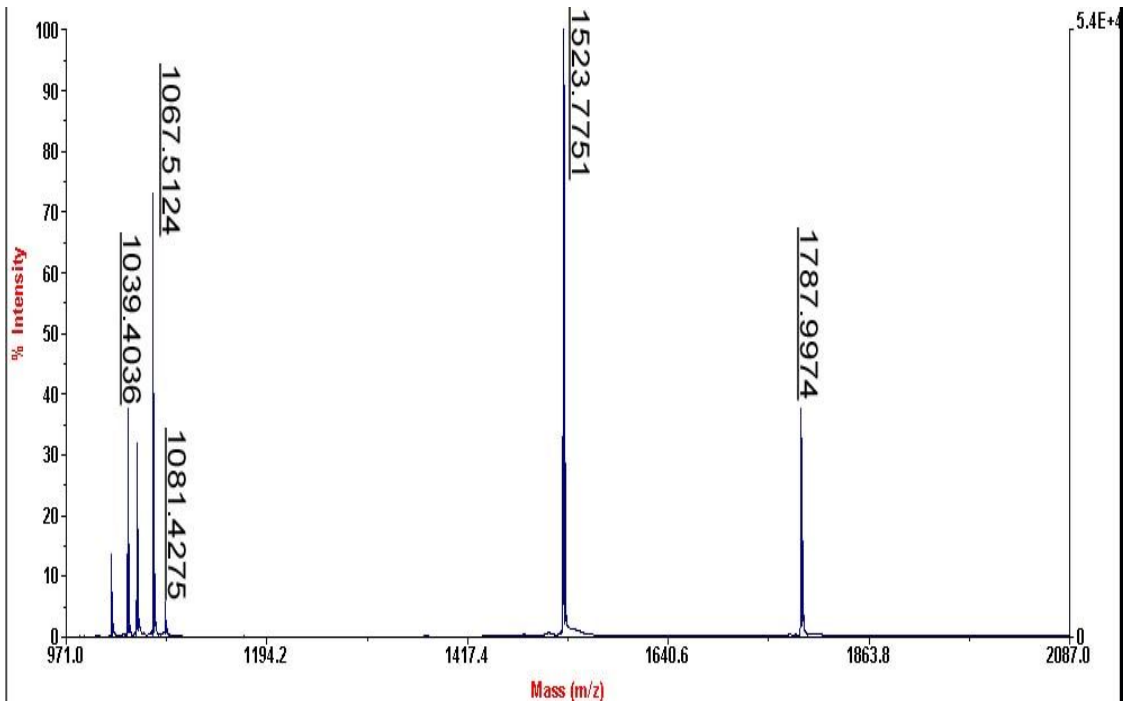

| Start - End | Observed  | Mr(expt)  | Mr(calc)  | Delta   | Miss Sequence          |
|-------------|-----------|-----------|-----------|---------|------------------------|
| 12 - 27     | 1787.9974 | 1786.9901 | 1786.9200 | 0.0702  | 0 K.TITLEVEPSDTIENVK.A |
| 30 - 42     | 1523.7751 | 1522.7678 | 1522.7739 | -0.0061 | 1 K.IQDKEGIPPDQQR.L    |
| 34 - 42     | 1039.4036 | 1038.3963 | 1038.5094 | -0.1131 | 0 K.EGIPPDQQR.L        |
| 55 - 63     | 1081.4275 | 1080.4202 | 1080.5451 | -0.1249 | 0 R.TLSDYNIQK.E        |
| 64 - 72     | 1067.5124 | 1066.5051 | 1066.6135 | -0.1084 | 0 K.ESTLHLVLR.L        |

No match to: 1021.3893, 1049.4933

16) Mitochondrial uncoupling protein 3

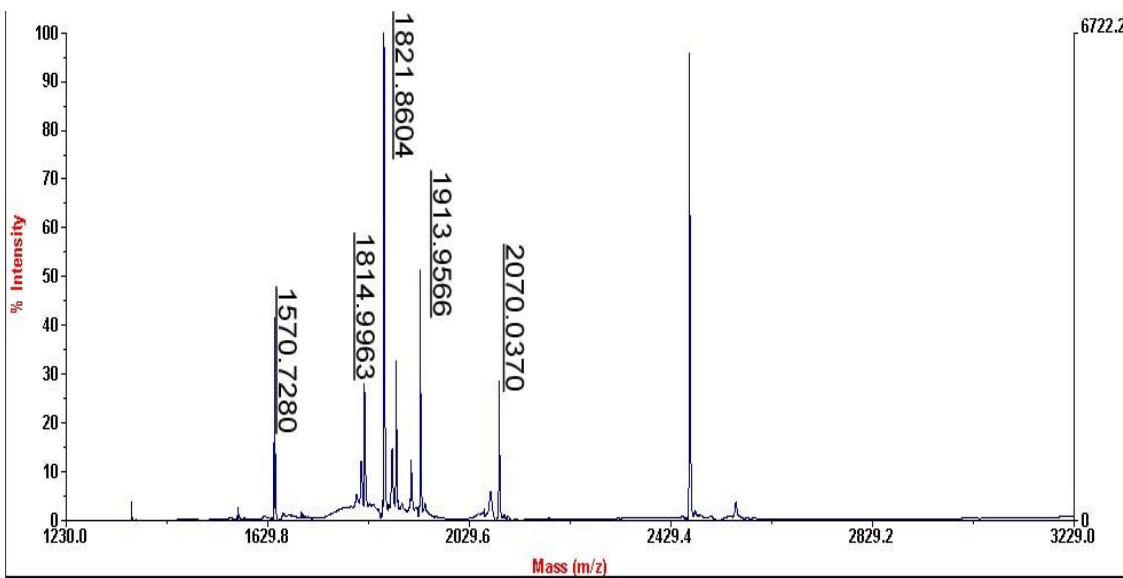

| Start - End | Observed  | Mr(expt)  | Mr(calc)  | Delta   | Miss Sequence           |
|-------------|-----------|-----------|-----------|---------|-------------------------|
| 88 - 103    | 1814.9963 | 1813.9890 | 1813.9396 | 0.0494  | 1 R.QMSFASIRIGLYDSVK.Q  |
| 144 - 157   | 1570.7280 | 1569.7207 | 1569.8011 | -0.0804 | 1 R.FQASIHLGPSRSDR.K    |
| 189 - 204   | 1821.8604 | 1820.8532 | 1820.9342 | -0.0810 | 0 R.NAIVNCAEVVTYDILK.E  |
| 283 - 298   | 1913.9566 | 1912.9493 | 1912.9756 | -0.0264 | 0 R.LGSWNVVMFVTYEQLK.R  |
| 283 - 299   | 2070.0370 | 2069.0297 | 2069.0767 | -0.0470 | 1 R.LGSWNVVMFVTYEQLKR.A |

No match to: 1019.4447, 1197.5840, 1359.6379, 1642.7134, 1859.8784, 1875.8612, 1883.8560, 1931.9683, 2088.0823, 2465.3227, 2557.3513

17) Moesin

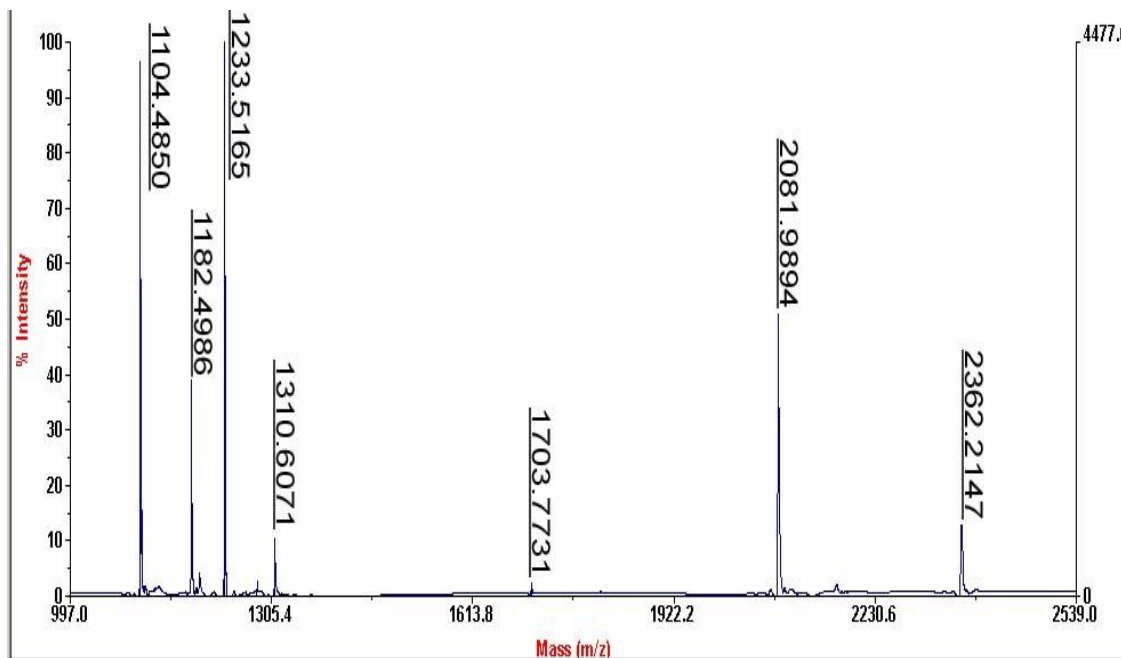

| Start - End | Observed  | Mr(expt)  | Mr(calc)  | Delta   | Miss Sequence               |
|-------------|-----------|-----------|-----------|---------|-----------------------------|
| 84 - 100    | 2081.9894 | 2080.9821 | 2080.9953 | -0.0132 | 0 K.FYPEDVSEELIQDITQR.L     |
| 213 - 233   | 2362.2147 | 2361.2074 | 2361.1600 | 0.0474  | 0 K.GSELWLGVDALGLNIYEQNDR.L |
| 238 - 246   | 1104.4850 | 1103.4777 | 1103.5763 | -0.0986 | 0 K.IGFPWSEIR.N             |
| 263 - 273   | 1310.6071 | 1309.5998 | 1309.6819 | -0.0821 | 1 K.KAPDFVIFYAPR.L          |
| 264 - 273   | 1182.4986 | 1181.4913 | 1181.5869 | -0.0956 | 0 K.APDFVIFYAPR.L           |
| 413 - 427   | 1703.7731 | 1702.7658 | 1702.8559 | -0.0902 | 0 K.TQEQLALEMAELTAR.I       |
| 439 - 448   | 1233.5165 | 1232.5092 | 1232.5673 | -0.0581 | 0 K.ESEAVEWQQK.A            |

No match to: 1195.4795, 1478.6859, 1623.7354, 2171.1001

18) Ig gamma-1 chain C region

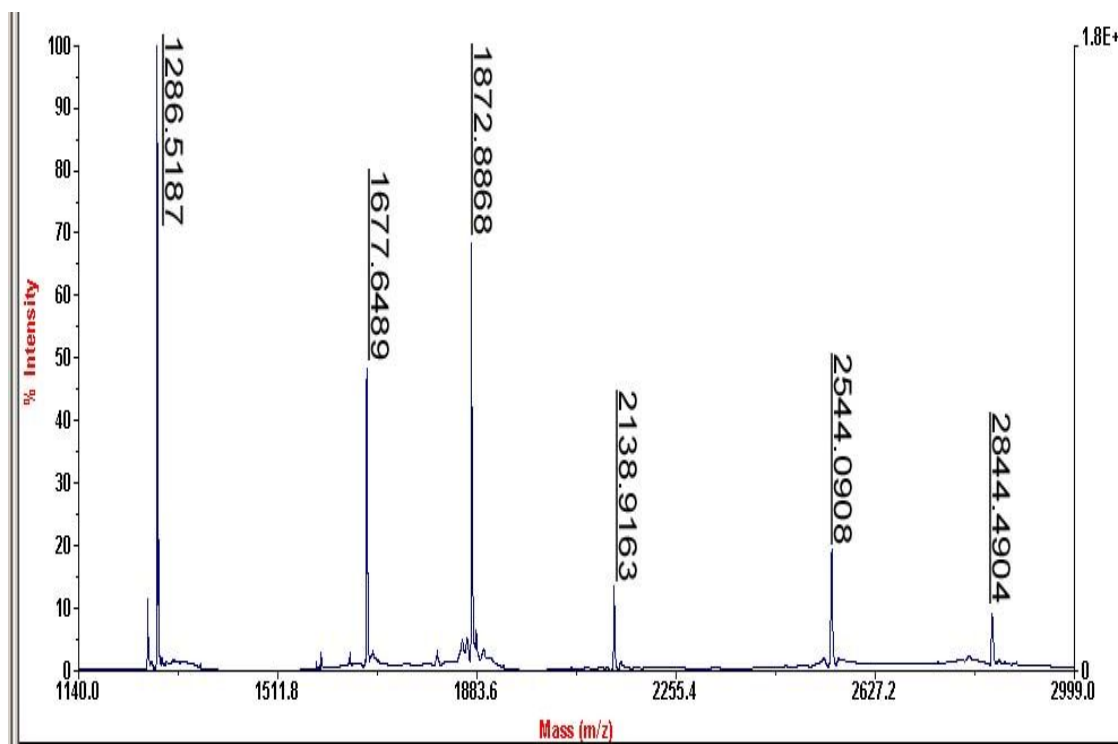

| Start - End                             | Observed  | Mr(expt)  | Mr(calc)  | Delta   | Miss Sequence                |
|-----------------------------------------|-----------|-----------|-----------|---------|------------------------------|
| 106 - 131                               | 2844.4904 | 2843.4831 | 2843.4502 | 0.0329  | 0                            |
| <b>K.THTCPPCPAPELLGGPSVFLFPPKPK.D 2</b> |           |           |           |         |                              |
| 139 - 157                               | 2138.9163 | 2137.9090 | 2138.0201 | -0.1111 | 0 R.TPEVTCVVVDVSHEDPEVK.F    |
| 158 - 171                               | 1677.6489 | 1676.6416 | 1676.7946 | -0.1530 | 0 K.FNWFYVDGVEVHNAK.T        |
| 228 - 238                               | 1286.5187 | 1285.5114 | 1285.6666 | -0.1552 | 0 R.EPQVYTLPPSR.D            |
| 228 - 243                               | 1872.8868 | 1871.8796 | 1871.9629 | -0.0833 | 1 R.EPQVYTLPPSRDELTK.N       |
| 254 - 275                               | 2544.0908 | 2543.0836 | 2543.1240 | -0.0404 | 0 K.GFYPSDIAVEWESNGQPENNYK.T |

No match to: 1268.5175

19) Leukocyte elastase inhibitor



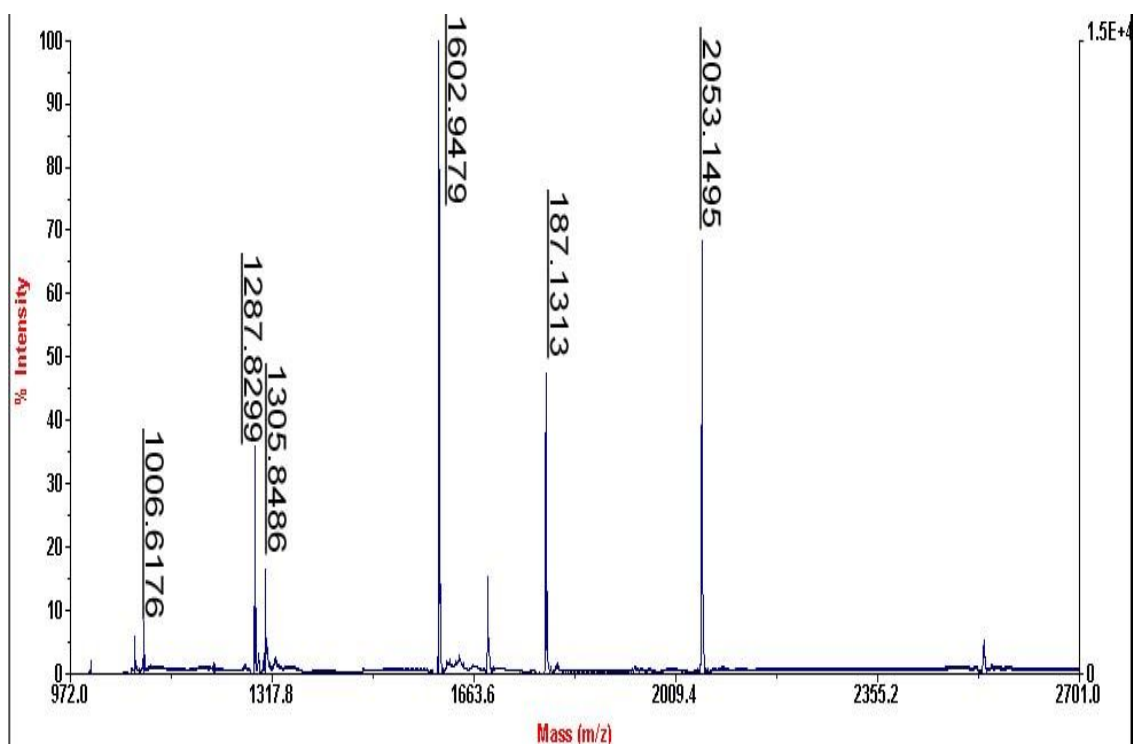

| Start - End | Observed  | Mr(expt)  | Mr(calc)  | Delta  | Miss Sequence       |
|-------------|-----------|-----------|-----------|--------|---------------------|
| 57 - 69     | 1602.9479 | 1601.9406 | 1601.7586 | 0.1820 | 0 K.TFHFNTVEEVHSR.F |
| 70 - 80     | 1305.8486 | 1304.8413 | 1304.6837 | 0.1577 | 1 R.FQSLNADINKR.G   |
| 178 - 186   | 1006.6176 | 1005.6104 | 1005.4879 | 0.1224 | 0 K.EATTNAPFR.L     |
| 204 - 213   | 1218.7256 | 1217.7184 | 1217.5968 | 0.1216 | 0 K.FAYGYIEDLK.C    |
| 291 - 301   | 1207.7816 | 1206.7743 | 1206.6244 | 0.1499 | 0 R.LGVQDLFNSSK.A   |
| 364 - 375   | 1287.8299 | 1286.8226 | 1286.6731 | 0.1495 | 0 R.HNSSGSILFLGR.F  |

No match to: 909.1137, 925.1257, 1687.0810, 1786.1058, 2053.1495, 2536.6373

20) Aminoacylase-1

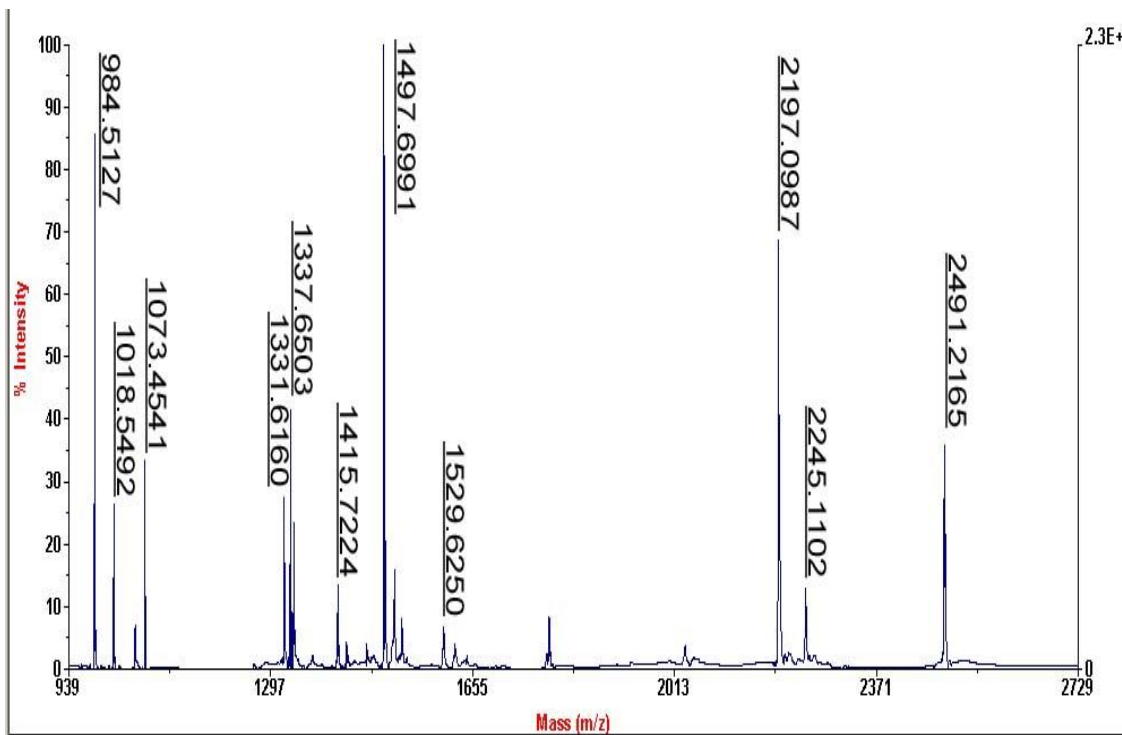

| Start - End | Observed  | Mr(expt)  | Mr(calc)  | Delta   | Miss Sequence                      |
|-------------|-----------|-----------|-----------|---------|------------------------------------|
| 5 - 17      | 1497.6991 | 1496.6919 | 1496.7259 | -0.0340 | 0 K.GPEEEHPSVTLFR.Q                |
| 24 - 43     | 2197.0987 | 2196.0915 | 2196.0851 | 0.0064  | 0 R.TVQPKPDYGA AVAFFEETAR.Q        |
| 89 - 100    | 1529.6250 | 1528.6177 | 1528.6735 | -0.0558 | 0 K.EHWSHDPFEAFK.D                 |
| 101 - 109   | 1073.4541 | 1072.4468 | 1072.4825 | -0.0357 | 0 K.DSEGYIYAR.G                    |
| 116 - 126   | 1337.6503 | 1336.6430 | 1336.6809 | -0.0378 | 0 K.CVSIQYLEAVR.R                  |
| 169 - 191   | 2491.2165 | 2490.2092 | 2490.1702 | 0.0390  | 0 R.AGFALDEGIANPTDAFTV FYSER.S     |
| 222 - 230   | 1018.5492 | 1017.5419 | 1017.5971 | -0.0552 | 0 K.VVNSILAFR.E                    |
| 256 - 276   | 2245.1102 | 2244.1029 | 2244.0884 | 0.0145  | 0 K.LEGGVAYNVIPATMSASFDFR.V        |
| 333 - 350   | 2030.9467 | 2029.9394 | 2029.9448 | -0.0054 | 0 K.DMNLTLPEIMPAATDNR.Y            |
| 354 - 367   | 1415.7224 | 1414.7152 | 1414.7390 | -0.0239 | 0 R.AVGVPALGFSPMNR.T               |
| 354 - 367   | 1431.6684 | 1430.6611 | 1430.7339 | -0.0728 | 0 R.AVGVPALGFSPMNR.T Oxidation (M) |
| 368 - 378   | 1331.6160 | 1330.6088 | 1330.6629 | -0.0542 | 0 R.TPVLLHDHDER.L                  |
| 379 - 386   | 984.5127  | 983.5054  | 983.5552  | -0.0498 | 0 R.LHEAVFLR.G                     |

No match to: 1056.5522, 1320.6186, 1467.7877, 1515.7160, 1602.7270, 1623.7644, 1790.8780

21) Selenium-binding protein 1

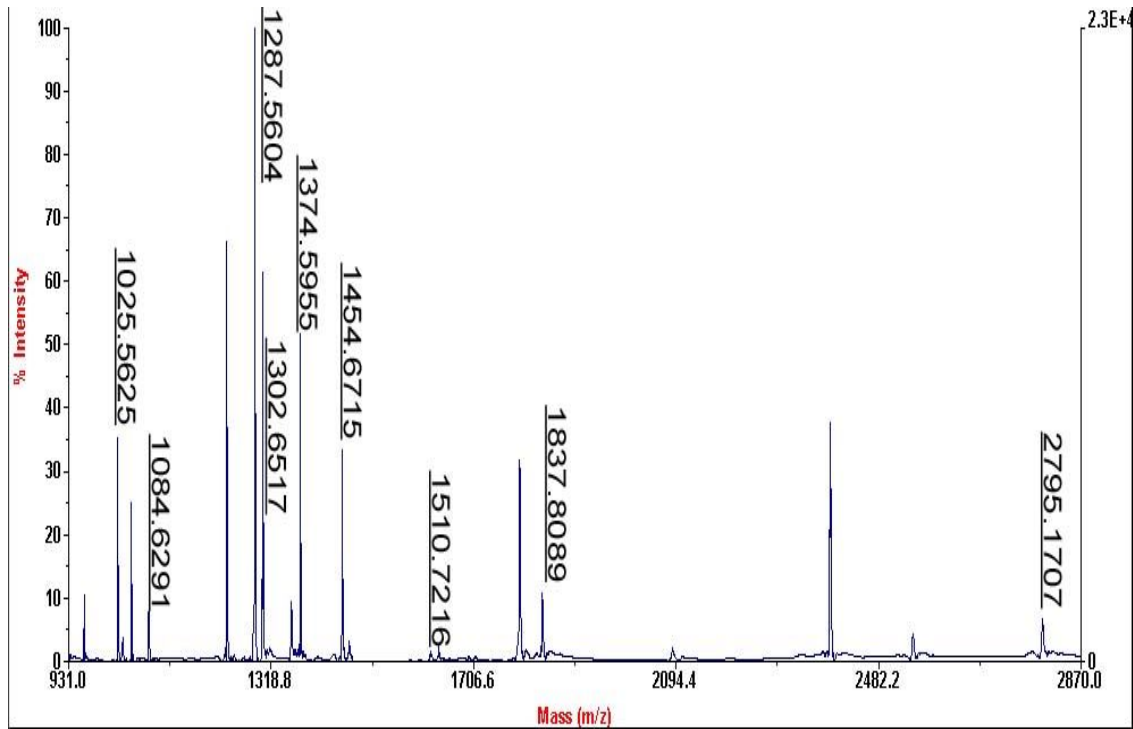

| Start - End                         | Observed  | Mr(expt)  | Mr(calc)  | Delta   | Miss Sequence          |
|-------------------------------------|-----------|-----------|-----------|---------|------------------------|
| 24 - 34                             | 1454.6715 | 1453.6642 | 1453.7275 | -0.0633 | 0 R.EEIVYLPCIYR.N      |
| 53 - 62                             | 1287.5604 | 1286.5531 | 1286.6190 | -0.0658 | 0 K.SPQYCQVIHR.L       |
| 94 - 103                            | 1084.6291 | 1083.6219 | 1083.6652 | -0.0433 | 0 K.LVLPSLISSR.I       |
| 161 - 174                           | 1510.7216 | 1509.7143 | 1509.7714 | -0.0571 | 0 K.GGFVLLDGETFEVK.G   |
| 196 - 211                           | 1837.8089 | 1836.8016 | 1836.9304 | -0.1288 | 0 R.HNVMISTEWAAPNVLR.D |
| 212 - 235                           | 2795.1707 | 2794.1634 | 2794.2775 | -0.1141 | 0                      |
| <b>R.DGFNPADVEAGLYGSHLYVVDWQR.H</b> |           |           |           |         |                        |
| 246 - 254                           | 1025.5625 | 1024.5552 | 1024.5917 | -0.0365 | 0 K.DGLIPLEIR.F        |
| 334 - 344                           | 1374.5955 | 1373.5882 | 1373.6688 | -0.0806 | 0 R.QYDISDPQRPR.L      |
| 412 - 419                           | 1051.4933 | 1050.4861 | 1050.5498 | -0.0638 | 0 K.QFYPLIR.E          |
| 449 - 460                           | 1302.6517 | 1301.6444 | 1301.7091 | -0.0647 | 0 K.EPLGPALAEHLR.Y     |

22) Cytosolic nonspecific dipeptidase

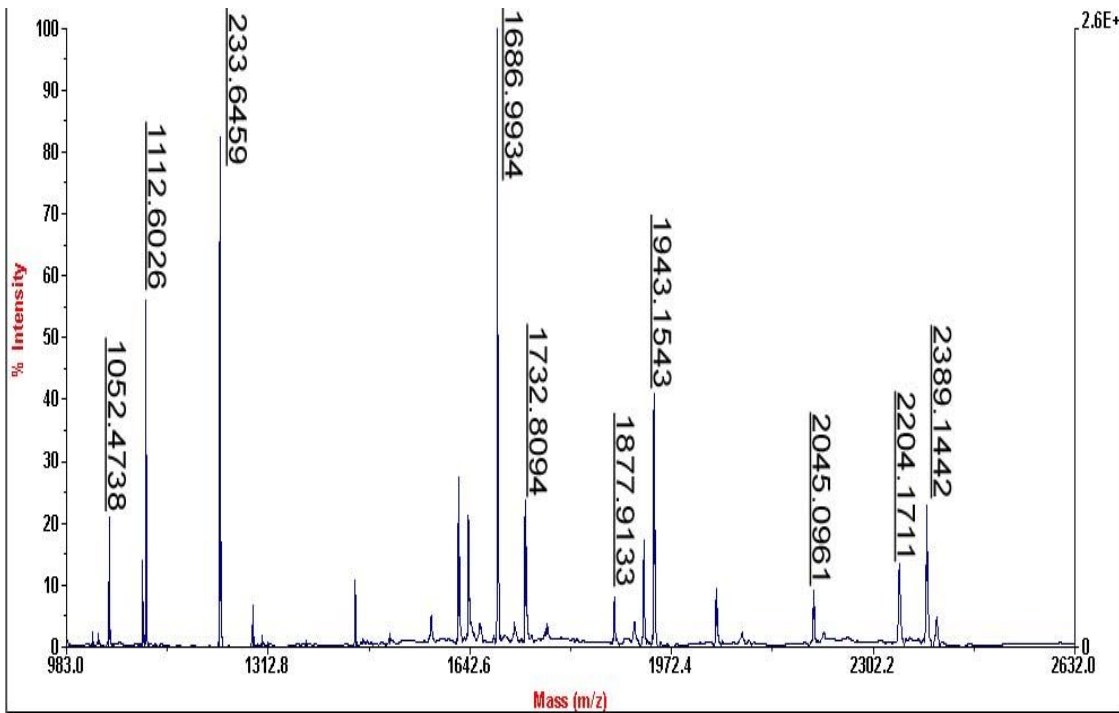

| Start - End   | Observed  | Mr(expt)  | Mr(calc)  | Delta   | Miss Sequence               |
|---------------|-----------|-----------|-----------|---------|-----------------------------|
| 1 - 17        | 2045.0961 | 2044.0888 | 2043.9935 | 0.0953  | 1 -.MAALTTLFKYIDENQDR.Y     |
| Oxidation (M) |           |           |           |         |                             |
| 10 - 17       | 1052.4738 | 1051.4665 | 1051.4570 | 0.0095  | 0 K.YIDENQDR.Y              |
| 67 - 84       | 1943.1543 | 1942.1470 | 1942.1251 | 0.0219  | 1 K.QKLPDGSEIPLPILLGR.L     |
| 69 - 84       | 1686.9934 | 1685.9861 | 1685.9716 | 0.0145  | 0 K.LPDGSEIPLPILLGR.L       |
| 150 - 159     | 1112.6026 | 1111.5954 | 1111.5985 | -0.0032 | 0 K.TGQEIPVNR.F             |
| 160 - 180     | 2389.1442 | 2388.1370 | 2388.0613 | 0.0757  | 0 R.FCLEGMEESGSEGLDELIFAR.K |
| 203 - 211     | 1107.6072 | 1106.5999 | 1106.5906 | 0.0093  | 0 K.KPCITYGLR.G             |
| 255 - 275     | 2204.1711 | 2203.1639 | 2203.1484 | 0.0155  | 0 R.GNILIPGINEAVAAVTEEEHK.L |
| 276 - 289     | 1732.8094 | 1731.8021 | 1731.7879 | 0.0142  | 0 K.LYDDIDFDIEEFAK.D        |
| 311 - 329     | 1877.9133 | 1876.9060 | 1876.9318 | -0.0258 | 0 R.YPSLSLHGIEGAFSGGAK.T    |
| 403 - 413     | 1233.6459 | 1232.6386 | 1232.6401 | -0.0015 | 0 K.TVFGVEPDLTR.E           |

No match to: 927.4822, 960.5557, 1454.7310, 1623.8088, 1639.9018, 1926.1182, 2344.1555

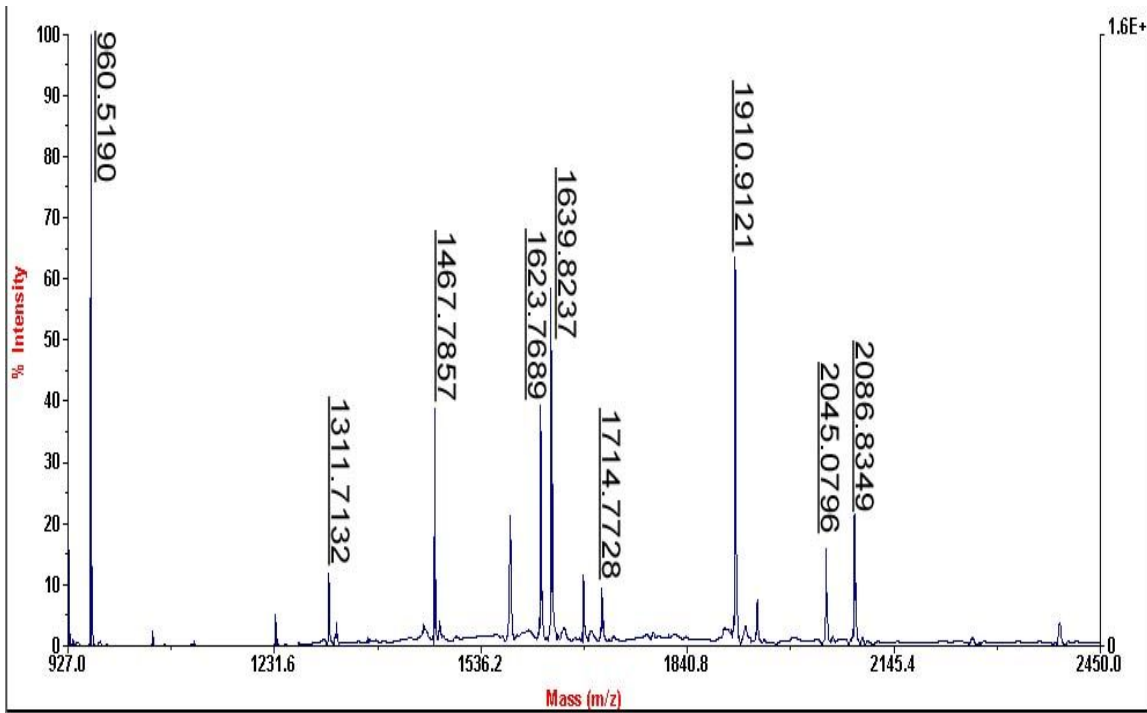

| Start - End | Observed  | Mr(expt)  | Mr(calc)  | Delta   | Miss Sequence                     |
|-------------|-----------|-----------|-----------|---------|-----------------------------------|
| 118 - 130   | 1714.7728 | 1713.7655 | 1713.7893 | -0.0238 | 1 K.QEPERNECFLQHK.D               |
| 139 - 160   | 2650.3839 | 2649.3766 | 2649.2566 | 0.1199  | 0 R.LVRPEVDVMCTAFHDNEETFLK.K      |
| 139 - 161   | 2778.4458 | 2777.4386 | 2777.3516 | 0.0870  | 1 R.LVRPEVDVMCTAFHDNEETFLKK.Y     |
| 162 - 168   | 927.4607  | 926.4534  | 926.4861  | -0.0327 | 0 K.YLYEIAR.R                     |
| 265 - 281   | 2086.8349 | 2085.8277 | 2085.8302 | -0.0026 | 0 K.VHTECCHGDLLECADDR.A 3         |
| 348 - 360   | 1623.7689 | 1622.7616 | 1622.7802 | -0.0186 | 0 K.DVFLGMFLYEYAR.R               |
| 348 - 360   | 1639.8237 | 1638.8164 | 1638.7751 | 0.0412  | 0 K.DVFLGMFLYEYAR.R Oxidation (M) |
| 361 - 372   | 1467.7857 | 1466.7784 | 1466.8357 | -0.0573 | 1 R.RHPDYSVLLLLR.L                |
| 362 - 372   | 1311.7132 | 1310.7059 | 1310.7346 | -0.0287 | 0 R.HPDYSVLLLLR.L                 |
| 397 - 413   | 2045.0795 | 2044.0722 | 2044.0880 | -0.0158 | 0 K.VFDEFKPLVEEPQNLIK.Q           |
| 427 - 434   | 960.5190  | 959.5117  | 959.5552  | -0.0435 | 0 K.FQNALLVR.Y                    |
| 509 - 524   | 1910.9121 | 1909.9049 | 1909.9243 | -0.0195 | 0 R.RPCFSALEVDETYVPK.E            |
| 525 - 543   | 2260.0009 | 2258.9936 | 2259.0154 | -0.0218 | 0 K.EFNAETFTFHADICTLSEK.E         |

No match to: 1579.0358, 1686.9558, 1943.1181, 2141.0920, 2389.1214

24) 14-3-3 protein zeta/delta

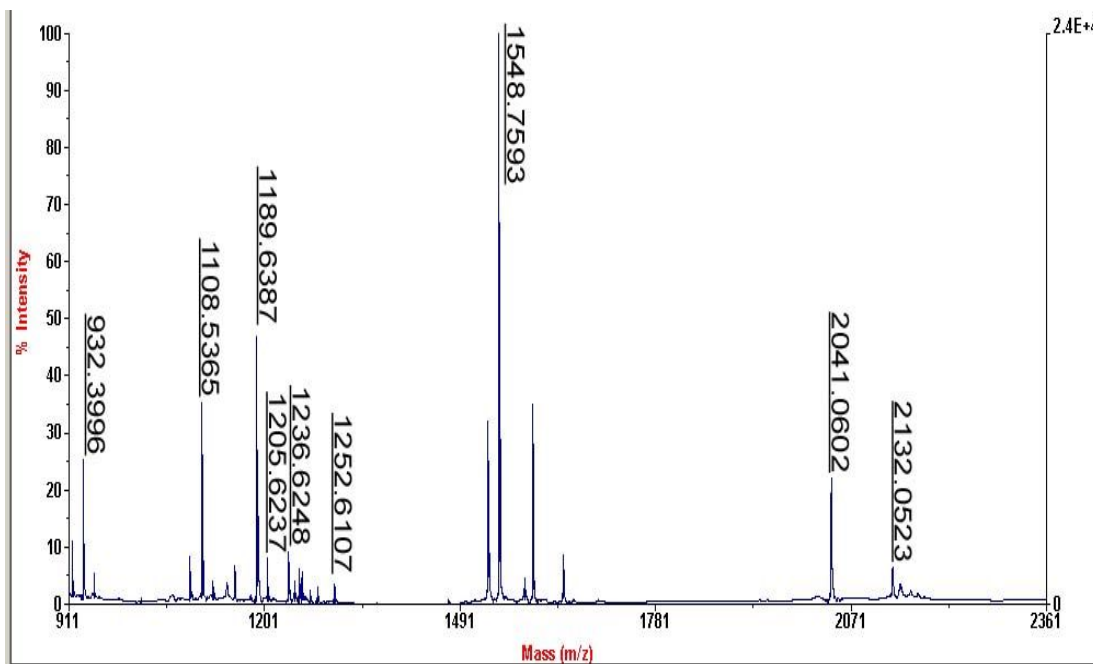

| Start - End | Observed  | Mr(expt)  | Mr(calc)  | Delta   | Miss Sequence                  |
|-------------|-----------|-----------|-----------|---------|--------------------------------|
| 28 - 41     | 1548.7593 | 1547.7520 | 1547.7063 | 0.0458  | 0 K.SVTEQGAELSNEER.N           |
| 121 - 127   | 932.3996  | 931.3923  | 931.4221  | -0.0298 | 1 K.MKGDYYR.Y                  |
| 140 - 157   | 2041.0602 | 2040.0529 | 2039.9799 | 0.0730  | 0 K.GIVDQSQQAYQEAFEISK.K       |
| 158 - 167   | 1236.6248 | 1235.6175 | 1235.6445 | -0.0269 | 1 K.KEMQPTHPIR.L               |
| 158 - 167   | 1252.6107 | 1251.6035 | 1251.6394 | -0.0359 | 1 K.KEMQPTHPIR.L Oxidation (M) |
| 159 - 167   | 1108.5365 | 1107.5292 | 1107.5495 | -0.0203 | 0 K.EMQPTHPIR.L                |
| 194 - 212   | 2132.0523 | 2131.0451 | 2130.9844 | 0.0606  | 0 K.TAFDEAIAELDTLSEESYK.D      |
| 213 - 222   | 1189.6387 | 1188.6315 | 1188.6536 | -0.0222 | 0 K.DSTLIMQLLR.D               |
| 213 - 222   | 1205.6237 | 1204.6165 | 1204.6485 | -0.0321 | 0 K.DSTLIMQLLR.D Oxidation (M) |

No match to: 916.4048, 1090.5343, 1156.5971, 1532.7557, 1598.7675, 1643.8528

25) Transgelin

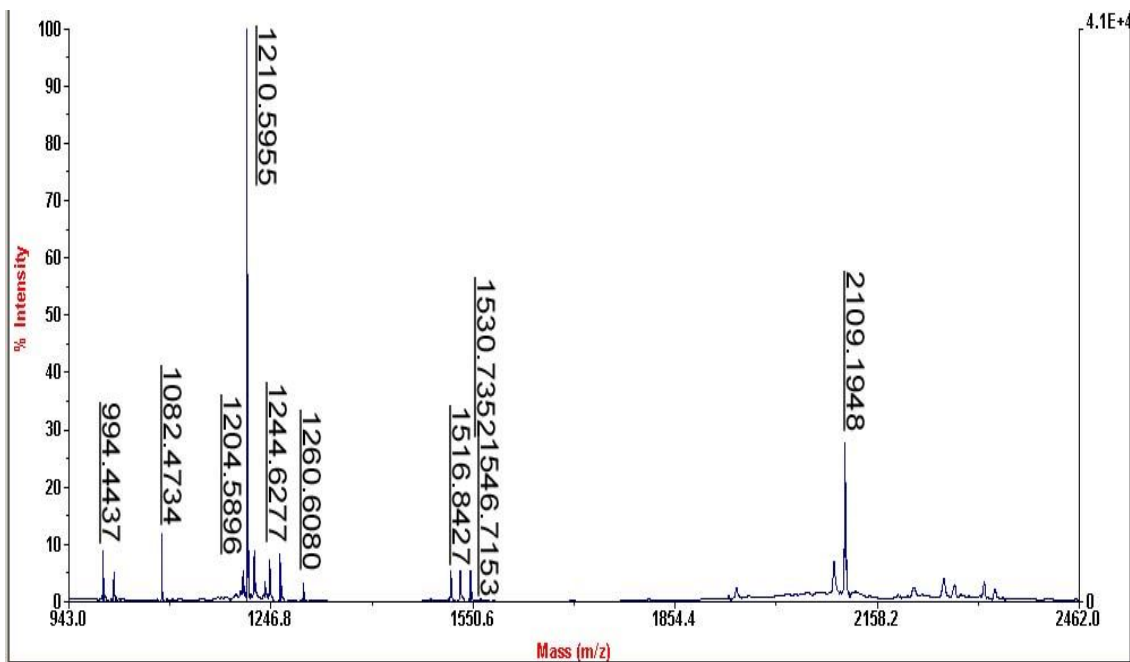

| Start - End   | Observed  | Mr(expt)  | Mr(calc)  | Delta   | Miss Sequence                     |
|---------------|-----------|-----------|-----------|---------|-----------------------------------|
| 21 - 29       | 1210.5955 | 1209.5882 | 1209.5513 | 0.0369  | 1 K.KYDEELEER.L                   |
| 22 - 29       | 1082.4734 | 1081.4661 | 1081.4563 | 0.0098  | 0 K.YDEELEER.L                    |
| 30 - 47       | 2109.1948 | 2108.1876 | 2108.0836 | 0.1039  | 0 R.LVEWIIVQCGPDVGRPDR.G          |
| 65 - 78       | 1516.8427 | 1515.8354 | 1515.8296 | 0.0058  | 0 K.LVNSLYPDGSKPKV.V              |
| 79 - 89       | 1244.6277 | 1243.6205 | 1243.6270 | -0.0066 | 0 K.VPENPPSMVFK.Q                 |
| 79 - 89       | 1260.6080 | 1259.6007 | 1259.6220 | -0.0213 | 0 K.VPENPPSMVFK.Q Oxidation (M)   |
| 109 - 121     | 1530.7352 | 1529.7279 | 1529.7072 | 0.0208  | 0 K.TDMFQTVDLFEGK.D               |
| 109 - 121     | 1546.7153 | 1545.7080 | 1545.7021 | 0.0059  | 0 K.TDMFQTVDLFEGK.D Oxidation (M) |
| 109 - 128     | 2318.1906 | 2317.1833 | 2317.0718 | 0.1115  | 1 K.TDMFQTVDLFEGKDMAAVQR.T        |
| Oxidation (M) |           |           |           |         |                                   |
| 129 - 140     | 1204.5896 | 1203.5824 | 1203.6897 | -0.1073 | 0 R.TLMALGSLAVTK.N                |
| 147 - 154     | 994.4437  | 993.4364  | 993.4378  | -0.0014 | 0 R.GDPNWFMK.K                    |
| 147 - 154     | 1010.4283 | 1009.4211 | 1009.4327 | -0.0117 | 0 R.GDPNWFMK.K Oxidation (M)      |

No match to: 2092.0082, 2213.8794, 2259.2073, 2274.2071

26) Annexin A5

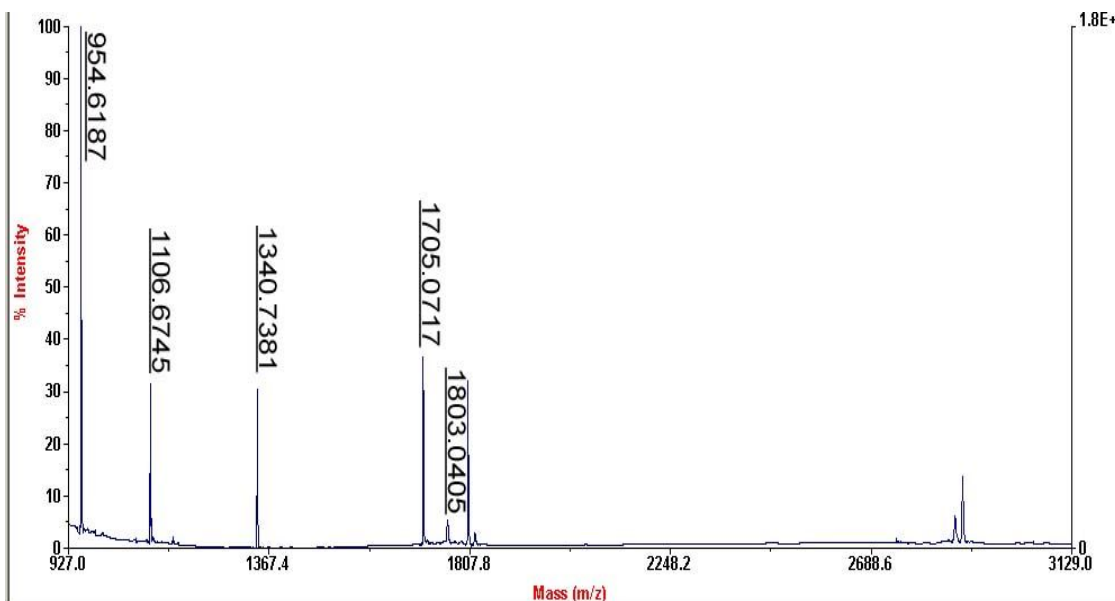

| Start - End | Observed  | Mr(expt)  | Mr(calc)  | Delta  | Miss Sequence          |
|-------------|-----------|-----------|-----------|--------|------------------------|
| 7 - 18      | 1340.7381 | 1339.7308 | 1339.6044 | 0.1264 | 0 R.GTVTDFPGFDER.A     |
| 30 - 45     | 1705.0717 | 1704.0644 | 1703.8941 | 0.1703 | 0 K.GLGTDEESILTLTTSR.S |
| 194 - 201   | 954.6187  | 953.6114  | 953.5334  | 0.0780 | 0 K.FITIFGTR.S         |
| 213 - 227   | 1803.0405 | 1802.0332 | 1801.8556 | 0.1776 | 0 K.YMTISGFQIEETIDR.E  |
| 277 - 285   | 1106.6745 | 1105.6672 | 1105.5767 | 0.0905 | 0 R.SEIDLFNIR.K        |

No match to: 2888.5858

27) Actin, cytoplasmic 1 (Beta-actin)

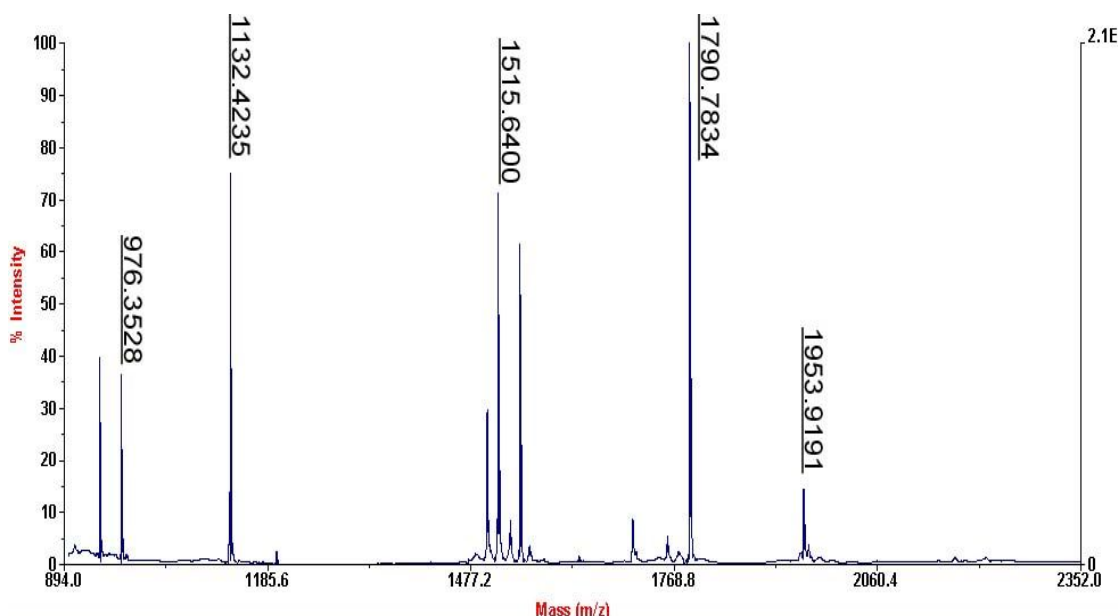

| Start - End | Observed | Mr(expt) | Mr(calc) | Delta | Miss Sequence |
|-------------|----------|----------|----------|-------|---------------|
|-------------|----------|----------|----------|-------|---------------|



|           |           |           |           |         |   |                        |
|-----------|-----------|-----------|-----------|---------|---|------------------------|
| 19 - 28   | 976.3528  | 975.3455  | 975.4410  | -0.0954 | 0 | K.AGFAGDDAPR.A         |
| 85 - 95   | 1515.6400 | 1514.6327 | 1514.7419 | -0.1092 | 0 | K.IWHHTFYNELR.V        |
| 96 - 113  | 1953.9191 | 1952.9118 | 1953.0571 | -0.1453 | 0 | R.VAPEEHPVLLTEAPLNPK.A |
| 197 - 206 | 1132.4235 | 1131.4162 | 1131.5196 | -0.1034 | 0 | R.GYSFTTTAER.E         |
| 239 - 254 | 1790.7834 | 1789.7761 | 1789.8846 | -0.1085 | 0 | K.SYELPDGQVITIGNER.F   |
| 360 - 372 | 1516.5988 | 1515.5916 | 1515.6953 | -0.1038 | 0 | K.QEYDESGPSIVHR.K      |

No match to: 945.4407, 1130.4573, 1499.5489, 1533.6220, 1547.6311, 1708.7797, 1758.8002

28) Actin, cytoplasmic 2 (Gamma-actin)

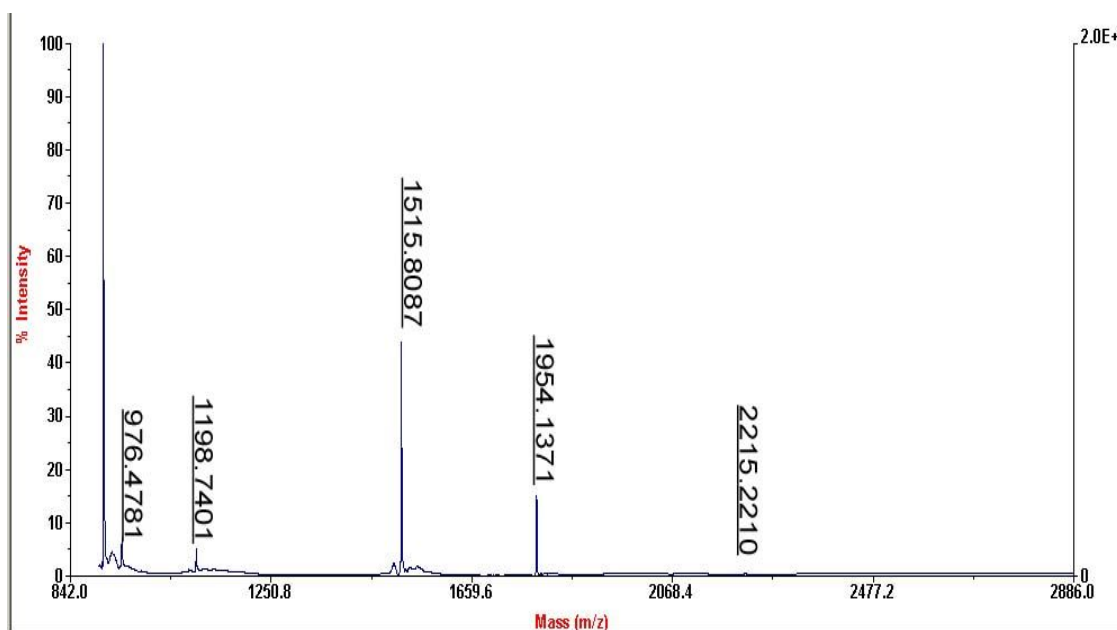

| Start - End | Observed  | Mr(expt)  | Mr(calc)  | Delta  | Miss Sequence               |
|-------------|-----------|-----------|-----------|--------|-----------------------------|
| 19 - 28     | 976.4781  | 975.4709  | 975.4410  | 0.0299 | 0 K.AGFAGDDAPR.A            |
| 29 - 39     | 1198.7401 | 1197.7329 | 1197.6982 | 0.0347 | 0 R.AVFPSIVGRPR.H           |
| 85 - 95     | 1515.8087 | 1514.8014 | 1514.7419 | 0.0595 | 0 K.IWHHTFYNELR.V           |
| 96 - 113    | 1954.1371 | 1953.1298 | 1953.0571 | 0.0727 | 0 R.VAPEEHPVLLTEAPLNPK.A    |
| 197 - 206   | 1132.5671 | 1131.5599 | 1131.5196 | 0.0402 | 0 R.GYSFTTTAER.E            |
| 239 - 254   | 1790.9888 | 1789.9815 | 1789.8846 | 0.0969 | 0 K.SYELPDGQVITIGNER.F      |
| 292 - 312   | 2215.2210 | 2214.2137 | 2214.0626 | 0.1511 | 0 K.DLYANTVLSGGTTMYPGIADR.M |
| 360 - 372   | 1516.7821 | 1515.7748 | 1515.6953 | 0.0795 | 0 K.QEYDESGPSIVHR.K         |

No match to: 945.5855, 1499.7350, 1547.7936, 4312.6452

29) Creatine kinase B-type

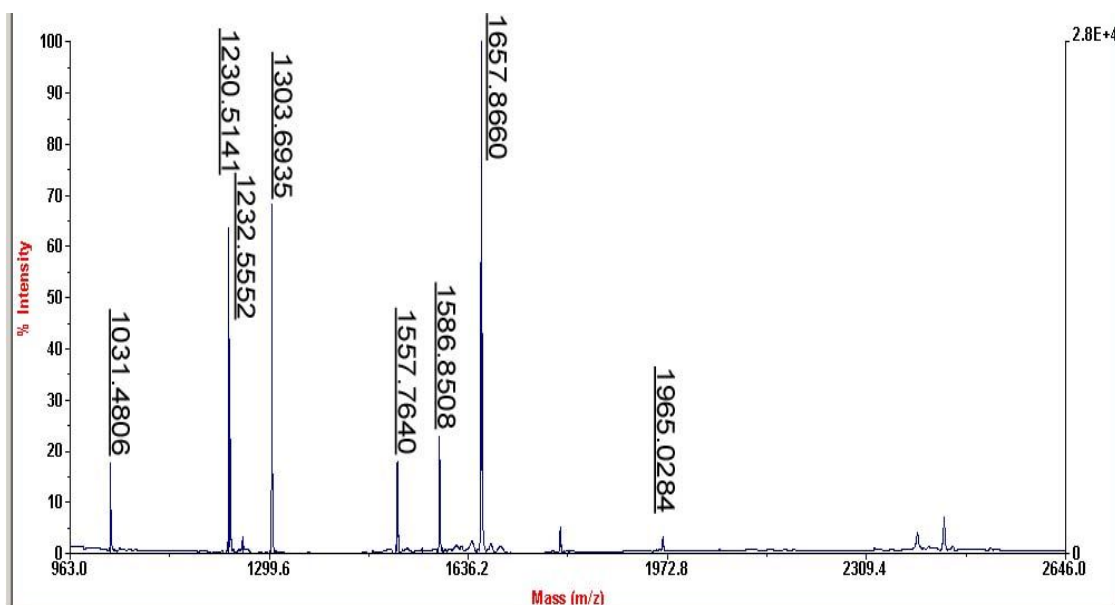

| Start - End | Observed  | Mr(expt)  | Mr(calc)  | Delta   | Miss Sequence               |
|-------------|-----------|-----------|-----------|---------|-----------------------------|
| 33 - 43     | 1303.6935 | 1302.6863 | 1302.7183 | -0.0321 | 0 K.VLTPELYAELR.A           |
| 87 - 96     | 1232.5552 | 1231.5479 | 1231.6084 | -0.0606 | 0 K.DLFDPIIEDR.H            |
| 139 - 148   | 1230.5141 | 1229.5068 | 1229.5434 | -0.0366 | 0 R.GFCLPPHCSR.G 2          |
| 157 - 172   | 1586.8508 | 1585.8435 | 1585.8311 | 0.0125  | 0 K.LAVEALSSLDGDLAGR.Y      |
| 224 - 236   | 1657.8660 | 1656.8587 | 1656.8260 | 0.0328  | 0 K.TFLVWVNEEDHLR.V         |
| 253 - 265   | 1557.7640 | 1556.7568 | 1556.7908 | -0.0341 | 0 R.FCTGLTQIETLFK.S         |
| 321 - 341   | 1965.0284 | 1964.0211 | 1963.9234 | 0.0976  | 0 R.GTGGVDTAAVGGVFDVSNADR.L |
| 359 - 366   | 1031.4806 | 1030.4734 | 1030.5481 | -0.0747 | 0 K.LLIEMEQR.L              |

No match to: 1790.9458, 2439.3994, 2518.4080

31) Inorganic pyrophosphatase

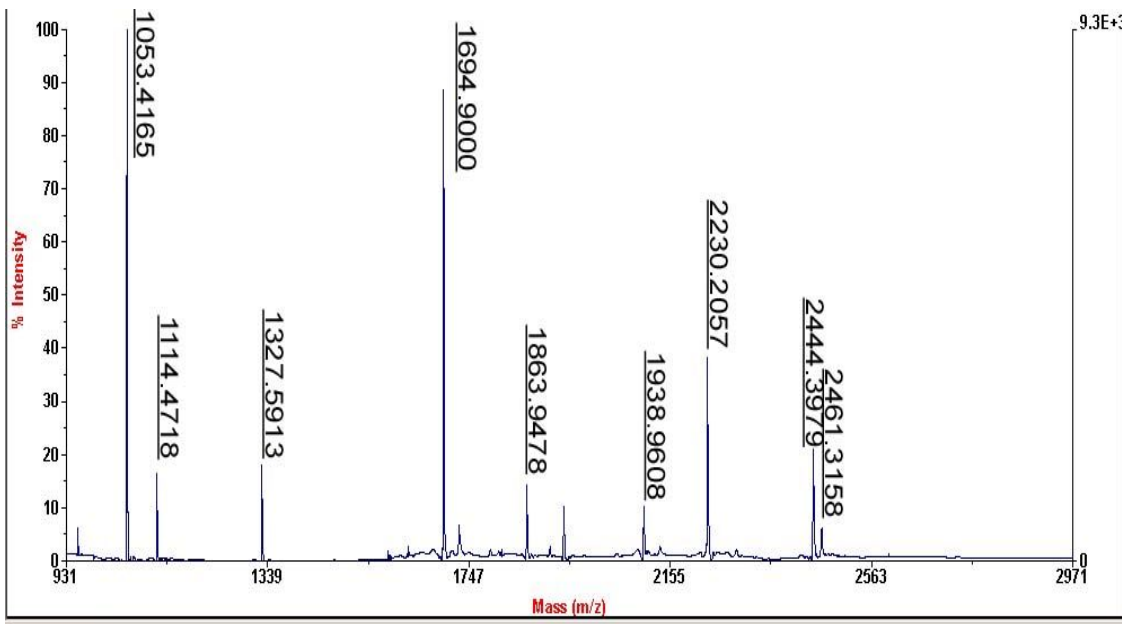

| Start - End | Observed  | Mr(expt)  | Mr(calc)  | Delta   | Miss Sequence                |
|-------------|-----------|-----------|-----------|---------|------------------------------|
| 10 - 18     | 1053.4165 | 1052.4093 | 1052.5291 | -0.1198 | 0 R.AAPFSLEYR.V              |
| 26 - 41     | 1863.9478 | 1862.9405 | 1862.9203 | 0.0203  | 0 K.GQYISPFHDIPIYADK.D       |
| 42 - 52     | 1327.5913 | 1326.5840 | 1326.6754 | -0.0914 | 0 K.DVFHMOVVEVPR.W           |
| 80 - 88     | 1114.4718 | 1113.4645 | 1113.5858 | -0.1213 | 0 R.YVANLFPYK.G              |
| 89 - 109    | 2461.3158 | 2460.3085 | 2460.1134 | 0.1951  | 0 K.GYIWNYGAIQPTWEDPGHNDK.H  |
| 156 - 177   | 2444.3979 | 2443.3907 | 2443.1979 | 0.1928  | 1 K.VIAINVDDPDAANYNDINDVKR.L |
| 178 - 191   | 1694.9000 | 1693.8927 | 1693.8827 | 0.0100  | 0 R.LKPGYLEATVDWFR.R         |
| 193 - 211   | 2230.2057 | 2229.1984 | 2229.0741 | 0.1243  | 1 R.YKVPDGKPENEFNAEFK.D      |
| 195 - 211   | 1938.9608 | 1937.9535 | 1937.9158 | 0.0376  | 0 K.VPDGKPENEFNAEFK.D        |

No match to: 927.3504, 954.2963, 1726.8779, 2101.1307

32) Betaine--homocysteine S-methyltransferase 1

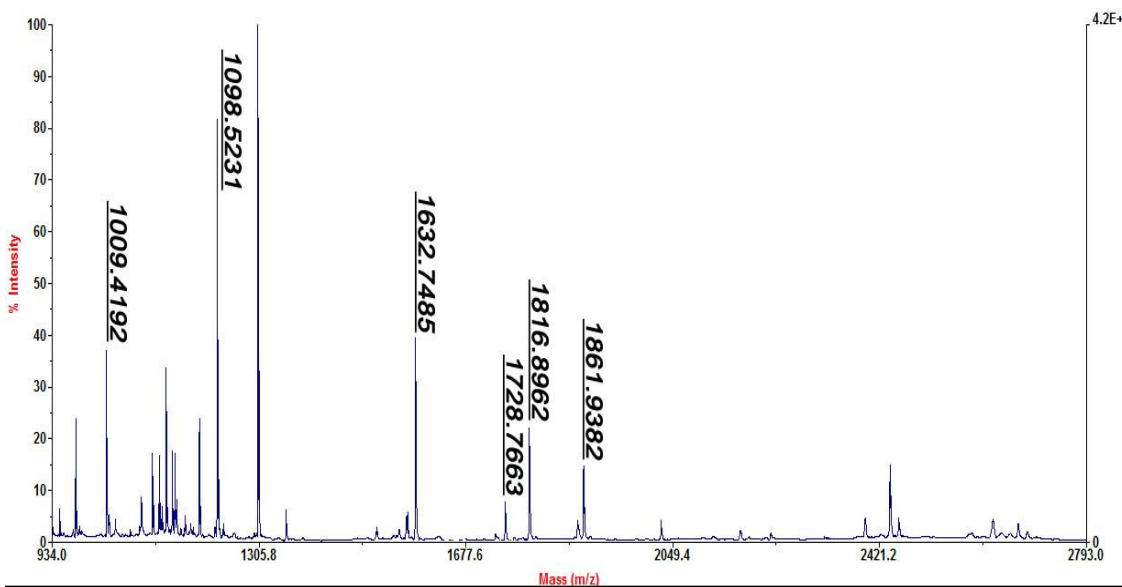

| Start - End | Observed  | Mr(expt)  | Mr(calc)  | Delta   | Miss Sequence           |
|-------------|-----------|-----------|-----------|---------|-------------------------|
| 41 - 57     | 1816.8962 | 1815.8889 | 1815.8903 | -0.0014 | 0 K.AGPWTPEAAVEHPEAVR.Q |
| 94 - 108    | 1632.7485 | 1631.7412 | 1631.7573 | -0.0161 | 0 K.ISGQEVNEAACDIAR.Q   |
| 259 - 274   | 1861.9382 | 1860.9310 | 1860.9410 | -0.0100 | 0 K.QGFIDLPEFPFGLPR.V   |
| 295 - 308   | 1728.7663 | 1727.7590 | 1727.7548 | 0.0043  | 0 R.YIGGCCGFEPYHIR.A 2  |
| 309 - 318   | 1098.5231 | 1097.5158 | 1097.5716 | -0.0558 | 0 R.AIAEELAPER.G        |
| 350 - 356   | 1009.4192 | 1008.4119 | 1008.4665 | -0.0545 | 0 K.EYWENLR.I           |

No match to: 1180.5972, 1307.6235, 1471.7264, 1804.9472

### 33) Retinal dehydrogenase 1

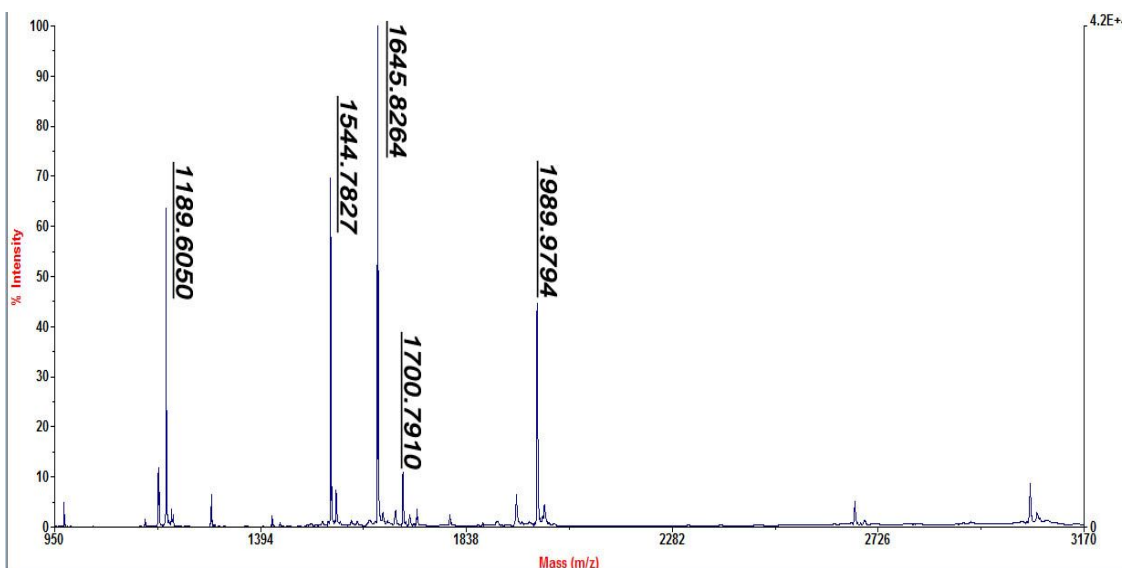

| Start - End | Observed | Mr(expt) | Mr(calc) | Delta | Miss Sequence |
|-------------|----------|----------|----------|-------|---------------|
|-------------|----------|----------|----------|-------|---------------|

|           |           |           |           |         |   |                      |
|-----------|-----------|-----------|-----------|---------|---|----------------------|
| 69 - 78   | 1189.6050 | 1188.5978 | 1188.6040 | -0.0062 | 0 | R.QAFQIGSPWR.T       |
| 144 - 156 | 1544.7827 | 1543.7755 | 1543.7671 | 0.0084  | 0 | R.TIPIDGNFFTYTR.H    |
| 309 - 321 | 1645.8264 | 1644.8192 | 1644.8035 | 0.0157  | 0 | R.IFVEESIYDEFVR.R    |
| 379 - 395 | 1989.9794 | 1988.9721 | 1988.9301 | 0.0420  | 0 | K.GYFVQPTVFSNVTDEM.R |
| 477 - 490 | 1700.7910 | 1699.7837 | 1699.7729 | 0.0109  | 0 | R.ELGEYGFHEYTEVK.T   |

No match to: 1172.5939, 1945.0640

### 34) Golgi phosphoprotein 2

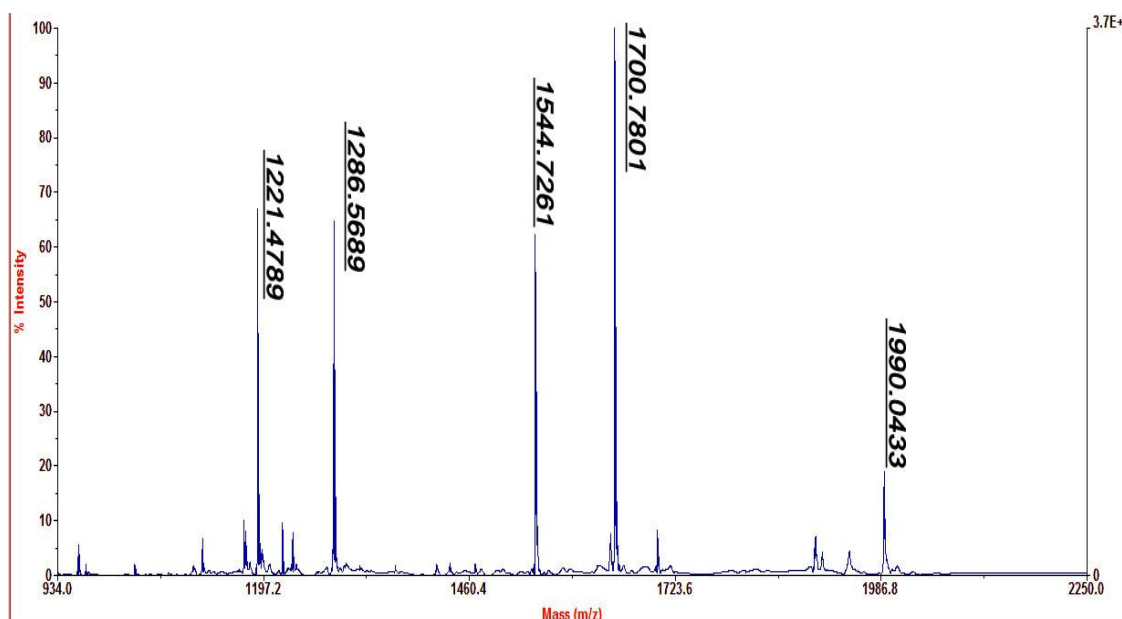

| Start - End | Observed  | Mr(expt)  | Mr(calc)  | Delta   | Miss Sequence          |
|-------------|-----------|-----------|-----------|---------|------------------------|
| 67 - 76     | 1221.4789 | 1220.4716 | 1220.6037 | -0.1321 | 1 K.KNEFQGELEK.Q       |
| 104 - 115   | 1286.5689 | 1285.5617 | 1285.6990 | -0.1373 | 0 K.AVLVNNITTGER.L     |
| 152 - 167   | 1990.0433 | 1989.0360 | 1988.9335 | 0.1025  | 1 K.FSYDLSQCINQMKEVK.E |
| 233 - 247   | 1544.7261 | 1543.7188 | 1543.7729 | -0.0541 | 0 K.SQTPAPSSEVVLDK.R   |
| 233 - 248   | 1700.7801 | 1699.7728 | 1699.8740 | -0.1012 | 1 K.SQTPAPSSEVVLDKR.Q  |

No match to: 1172.4657, 1189.4799, 1645.7920

### 35) Alcohol dehydrogenase class 3 chi chain

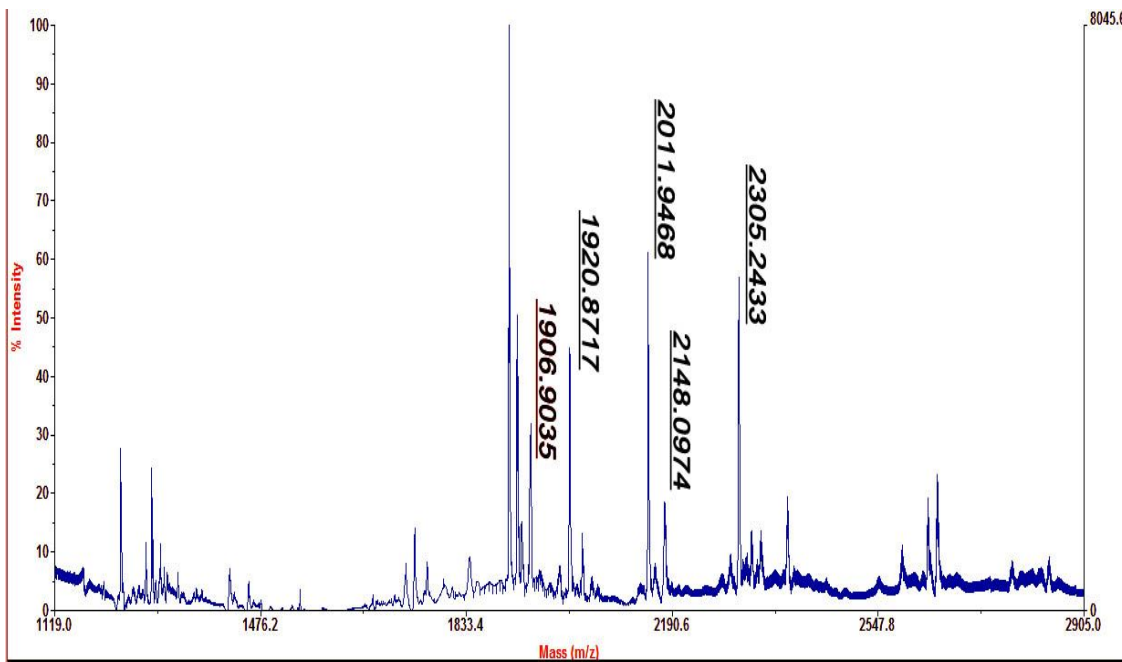

| Start - End | Observed  | Mr(expt)  | Mr(calc)  | Delta   | Miss Sequence                |
|-------------|-----------|-----------|-----------|---------|------------------------------|
| 10 - 31     | 2305.2433 | 2304.2360 | 2304.2364 | -0.0004 | 0 K.AAVAWAEGKPLSIEEIEVAPPK.A |
| 85 - 101    | 1920.8717 | 1919.8644 | 1919.9121 | -0.0477 | 0 K.AGDTVIPLYIPQCGECK.F 2    |
| 169 - 188   | 2011.9468 | 2010.9395 | 2010.9866 | -0.0471 | 0 K.VCLLGCGISTGYGAAVNTAK.L 2 |
| 340 - 357   | 2148.0974 | 2147.0902 | 2147.0898 | 0.0004  | 1 K.IKVDEFVTHNLSFDEINK.A     |
| 342 - 357   | 1906.9035 | 1905.8962 | 1905.9108 | -0.0146 | 0 K.VDEFVTHNLSFDEINK.A       |

No match to: 2188.0825

36) Isocitrate dehydrogenase

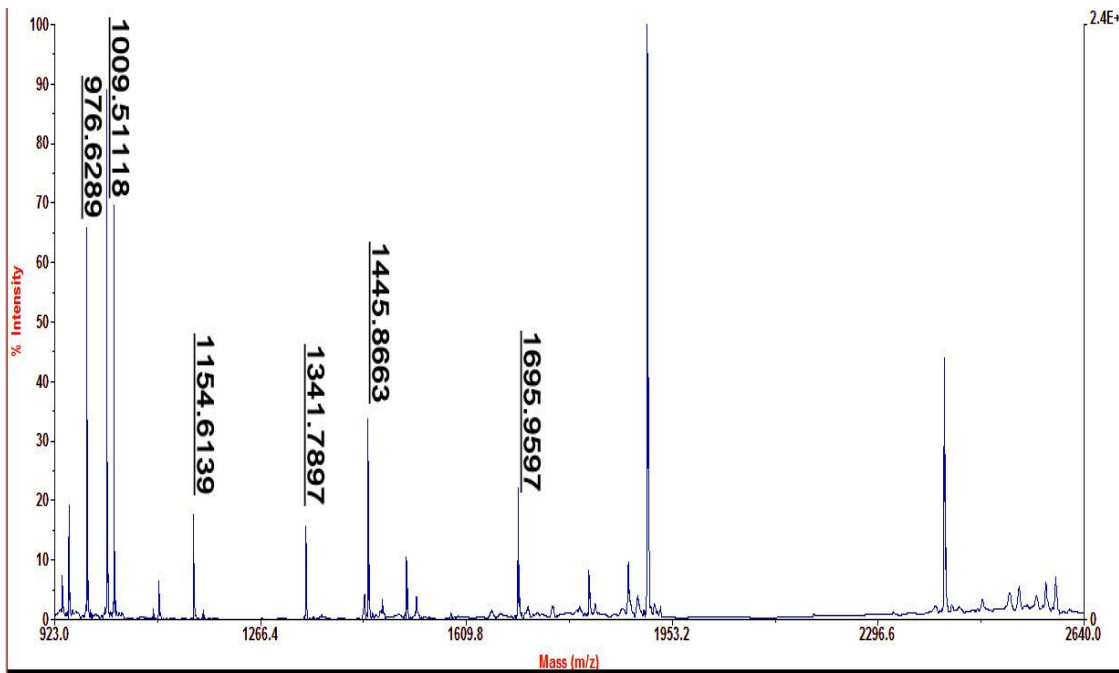

| Start - End | Observed  | Mr(expt)  | Mr(calc)  | Delta  | Miss Sequence          |
|-------------|-----------|-----------|-----------|--------|------------------------|
| 5 - 20      | 1695.9597 | 1694.9524 | 1694.7603 | 0.1921 | 0 K.ISGGSVVEMQGDEMTR.I |
| 101 - 109   | 976.6289  | 975.6216  | 975.5501  | 0.0715 | 0 R.NILGGTVFR.E        |
| 133 - 140   | 1009.5118 | 1008.5046 | 1008.4413 | 0.0633 | 0 R.HAYGDQYR.A         |
| 223 - 233   | 1445.8633 | 1444.8561 | 1444.7238 | 0.1323 | 1 R.FKDIFQEIYDK.Q      |
| 244 - 249   | 903.4992  | 902.4919  | 902.4399  | 0.0521 | 0 K.IWYEHR.L           |
| 261 - 270   | 1154.6139 | 1153.6066 | 1153.5226 | 0.0841 | 0 K.SEGGFIWACK.N       |
| 302 - 314   | 1341.7897 | 1340.7824 | 1340.6684 | 0.1140 | 0 K.TVEAEAAHGTVTR.H    |

No match to: 946.6210, 1021.5150, 1911.1206, 2406.5081

37) Fructose-bisphosphate aldolase A

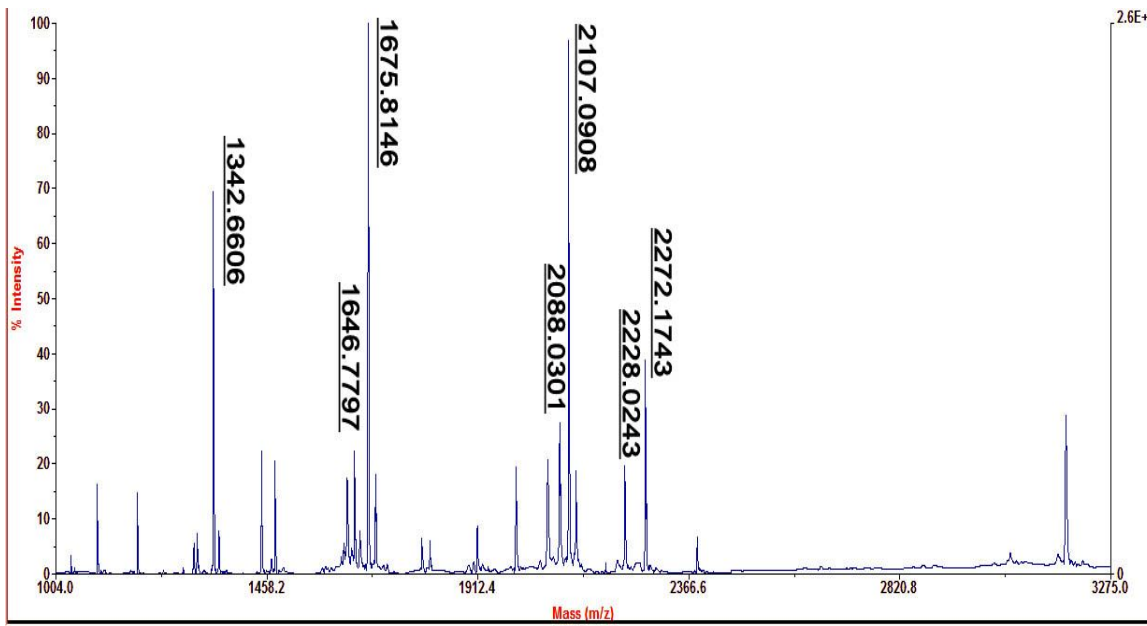

| Start - End | Observed  | Mr(expt)  | Mr(calc)  | Delta   | Miss Sequence                 |
|-------------|-----------|-----------|-----------|---------|-------------------------------|
| 44 - 57     | 1646.7797 | 1645.7724 | 1645.8019 | -0.0295 | 1 R.LQSIGTENTEENRR.F          |
| 70 - 87     | 2088.0301 | 2087.0228 | 2087.0873 | -0.0645 | 0 R.VNPCIGGVILFHETLYQK.A      |
| 88 - 99     | 1342.6606 | 1341.6533 | 1341.7041 | -0.0507 | 0 K.ADDGRPFQVIK.S             |
| 112 - 134   | 2272.1734 | 2271.1661 | 2271.1342 | 0.0319  | 0 K.GVVPLAGTNGETTTQGLDGLSER.C |
| 154 - 173   | 2107.0908 | 2106.0836 | 2106.0891 | -0.0055 | 0 K.IGEHTPSALAIMENANVLAR.Y    |
| 244 - 258   | 1675.8146 | 1674.8073 | 1674.8399 | -0.0326 | 0 K.FSHEEIAMATVTALR.R         |
| 343 - 364   | 2228.0243 | 2227.0170 | 2227.0181 | -0.0011 | 0 K.YTPSGQAGAAASESLFVSNHAY.-  |

No match to: 2062.1415, 3177.7975

38) Glyceraldehyde-3-phosphate dehydrogenase



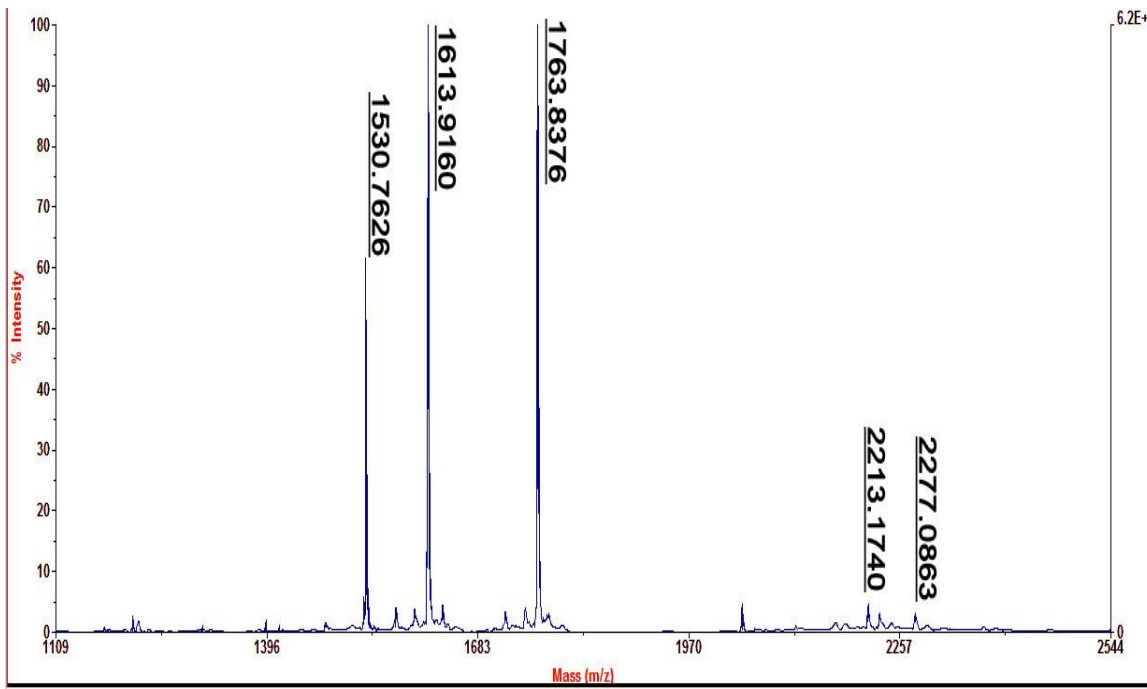

| Start - End | Observed  | Mr(expt)  | Mr(calc)  | Delta   | Miss Sequence               |
|-------------|-----------|-----------|-----------|---------|-----------------------------|
| 67 - 80     | 1613.9160 | 1612.9087 | 1612.8936 | 0.0151  | 0 K.LVINGNPITIFQER.D        |
| 87 - 107    | 2277.0863 | 2276.0790 | 2276.0306 | 0.0484  | 0 K.WGDAGAEYVVESTGVFTTMEK.A |
| 119 - 139   | 2213.1740 | 2212.1667 | 2212.1020 | 0.0648  | 0 R.VIISAPSADAPMFVMGVNHEK.Y |
| 235 - 248   | 1530.7626 | 1529.7554 | 1529.7871 | -0.0318 | 0 R.VPTANVSVDLTCR.L         |
| 310 - 323   | 1763.8376 | 1762.8303 | 1762.7950 | 0.0353  | 0 K.LISWYDNEFGYSNR.V        |

No match to: 1634.7924, 2042.1574

### 39) Malate dehydrogenase

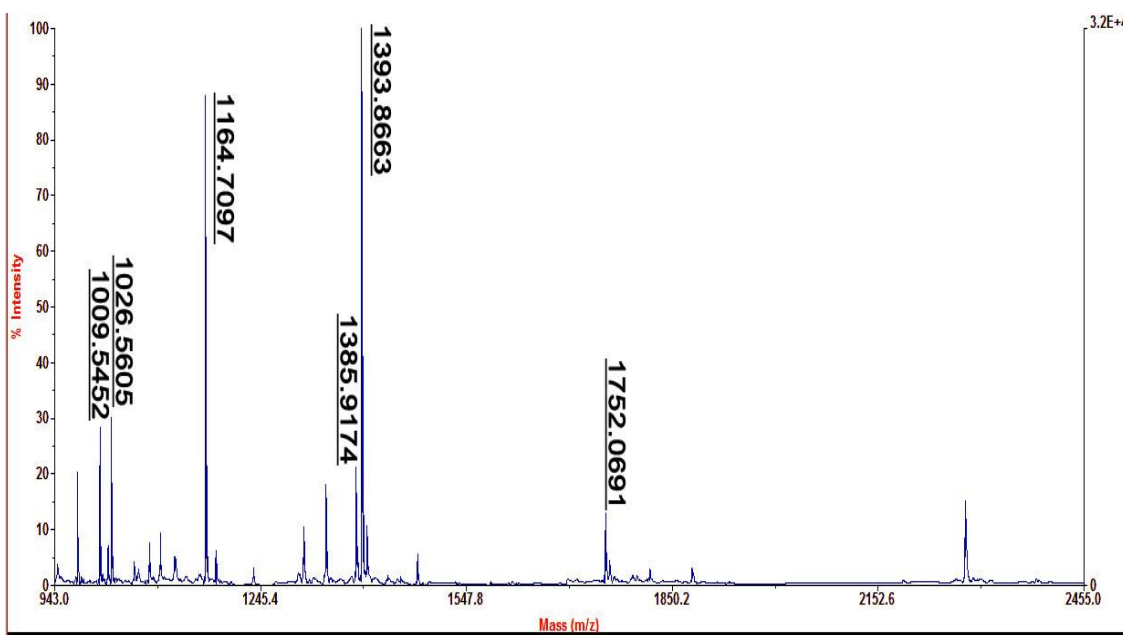

| Start - End | Observed  | Mr(expt)  | Mr(calc)  | Delta  | Miss Sequence                 |
|-------------|-----------|-----------|-----------|--------|-------------------------------|
| 80 - 92     | 1385.9174 | 1384.9102 | 1384.7384 | 0.1718 | 0 K.DLDVAILVGSMPR.R           |
| 150 - 157   | 1026.5605 | 1025.5532 | 1025.4600 | 0.0932 | 0 K.ENFSCLTR.L                |
| 206 - 220   | 1752.0691 | 1751.0618 | 1750.8777 | 0.1841 | 1 K.EVGVYEALKDDSWLK.G         |
| 221 - 230   | 1164.7097 | 1163.7025 | 1163.5934 | 0.1090 | 0 K.GEVTTVQQR.G               |
| 239 - 248   | 1009.5452 | 1008.5380 | 1008.5273 | 0.0106 | 1 R.KLSSAMSAK.A Oxidation (M) |
| 299 - 310   | 1393.8663 | 1392.8591 | 1392.7037 | 0.1554 | 0 K.FVEGLPINDFSR.E            |

No match to: 976.6465, 2280.3798

#### 40) Purine nucleoside phosphorylase

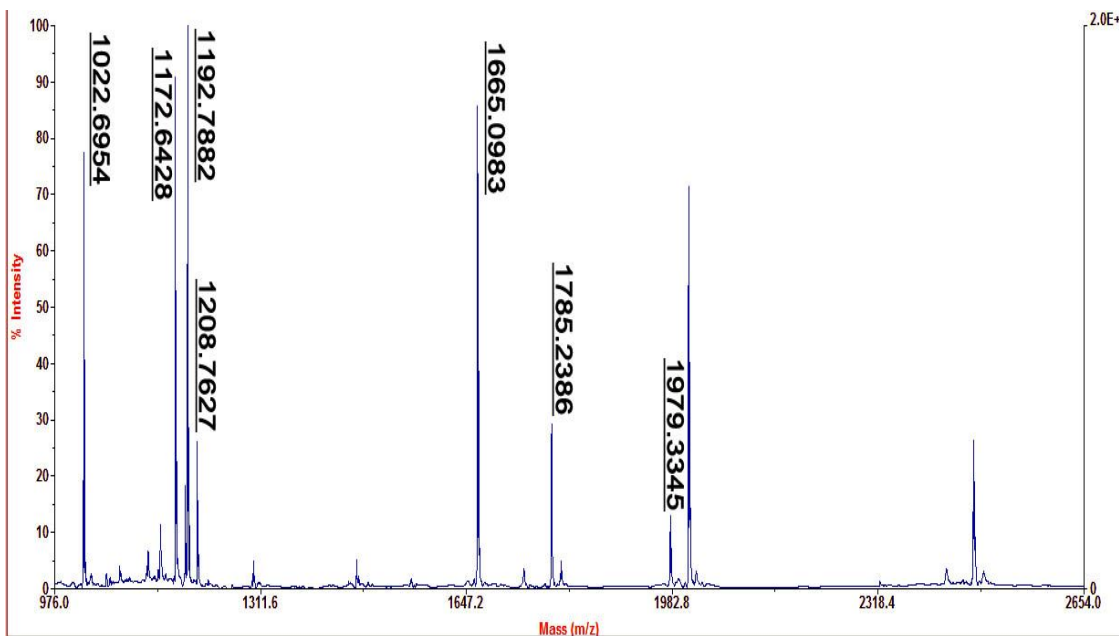

| Start - End | Observed  | Mr(expt)  | Mr(calc)  | Delta  | Miss Sequence                 |
|-------------|-----------|-----------|-----------|--------|-------------------------------|
| 23 - 41     | 1979.3345 | 1978.3272 | 1978.0418 | 0.2855 | 0 K.HRPQVAICGSLGGLTDK.L       |
| 68 - 76     | 1022.6954 | 1021.6881 | 1021.5708 | 0.1173 | 0 R.LVFGFLNGR.A               |
| 124 - 133   | 1192.7908 | 1191.7835 | 1191.6321 | 0.1514 | 0 K.FEVDIMLIR.D               |
| 124 - 133   | 1208.7627 | 1207.7554 | 1207.6270 | 0.1283 | 0 K.FEVDIMLIR.D Oxidation (M) |
| 159 - 168   | 1172.6428 | 1171.6355 | 1171.4968 | 0.1387 | 0 R.FPAMSDAYDR.T              |
| 212 - 229   | 1785.2386 | 1784.2313 | 1783.9501 | 0.2811 | 0 K.LGADAVGMSTVPEVIVAR.H      |
| 255 - 270   | 1665.0983 | 1664.0910 | 1663.8641 | 0.2269 | 1 K.ANHEEVLAAGKQAAQK.L        |

No match to: 2009.3161, 2473.5816

41) Triosephosphate isomerase

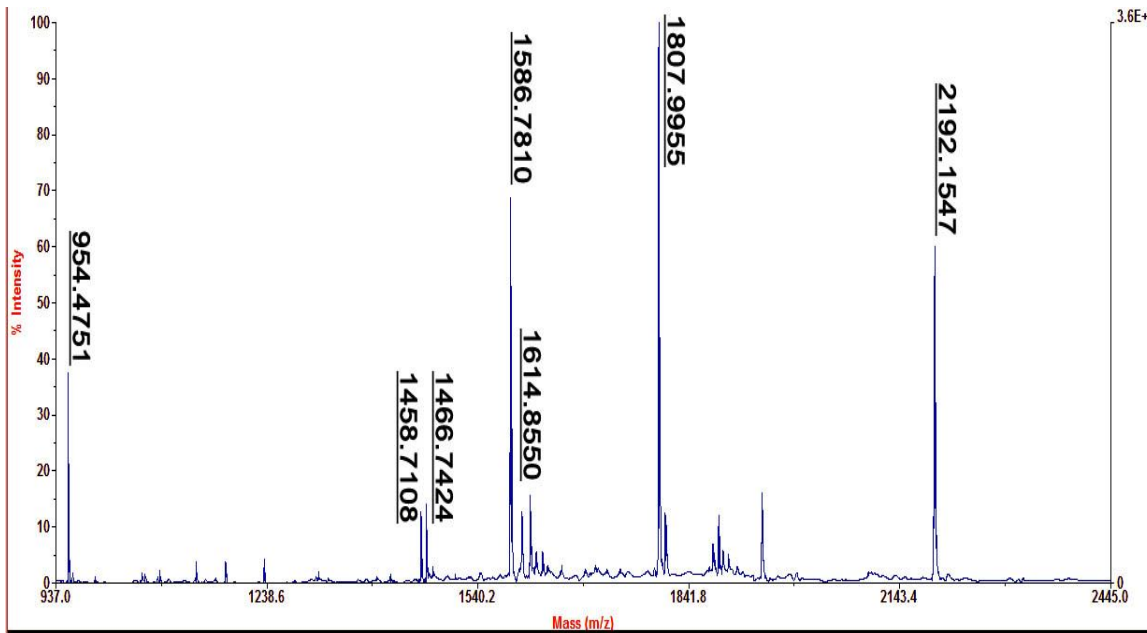

| Start - End | Observed  | Mr(expt)  | Mr(calc)  | Delta   | Miss Sequence              |
|-------------|-----------|-----------|-----------|---------|----------------------------|
| 7 - 14      | 954.4751  | 953.4679  | 953.4759  | -0.0080 | 0 K.FFVGGNWK.M             |
| 34 - 53     | 2192.1547 | 2191.1474 | 2191.0619 | 0.0855  | 0 K.VPADTEVVCAPPTAYIDFAR.Q |
| 86 - 99     | 1586.7810 | 1585.7737 | 1585.7307 | 0.0431  | 0 K.DCGATWVVLGHSER.R       |
| 100 - 113   | 1614.8550 | 1613.8477 | 1613.8161 | 0.0316  | 1 R.RHVFGESDELIGQK.V       |
| 101 - 113   | 1458.7108 | 1457.7035 | 1457.7150 | -0.0115 | 0 R.HVFGESDELIGQK.V        |
| 114 - 131   | 1807.9955 | 1806.9882 | 1806.9661 | 0.0221  | 0 K.VAHALAEGLGVIACIGEK.L   |
| 176 - 188   | 1466.7424 | 1465.7351 | 1465.7161 | 0.0190  | 0 K.TATPQQAQEVHEK.L        |

No match to: 1797.9528, 1946.0694

42) Phosphatidylethanolamine-binding protein 1 (PEBP-1)

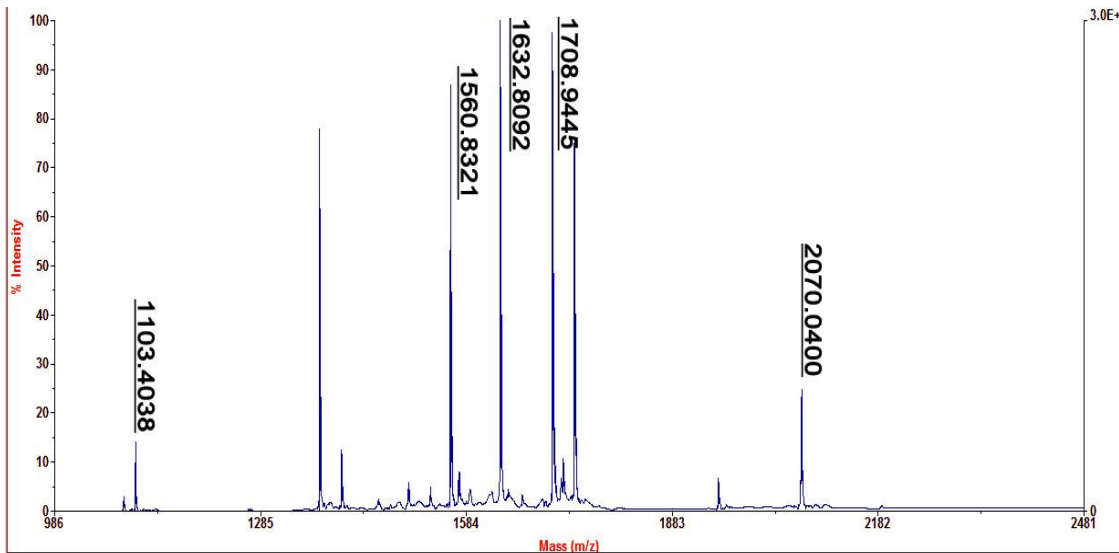

| Start - End | Observed  | Mr(expt)  | Mr(calc)  | Delta   | Miss Sequence            |
|-------------|-----------|-----------|-----------|---------|--------------------------|
| 48 - 62     | 1632.8092 | 1631.8019 | 1631.7903 | 0.0116  | 0 K.NRPTSISWDGLDSGK.L    |
| 63 - 76     | 1560.8321 | 1559.8249 | 1559.8195 | 0.0054  | 0 K.LYTLVLTDPDAPSR.K     |
| 120 - 132   | 1708.9445 | 1707.9372 | 1707.8984 | 0.0388  | 0 R.YVWLVEYEQDRPLK.C     |
| 133 - 141   | 1103.4038 | 1102.3965 | 1102.5077 | -0.1111 | 0 K.CDEPILSNR.S          |
| 162 - 179   | 2070.0400 | 2069.0327 | 2068.9200 | 0.1127  | 0 R.APVAGTCYQAEWDDYVPK.L |

No match to: 1370.6300, 1402.6165, 1572.8070, 1740.8949

#### 43) Aldose reductase

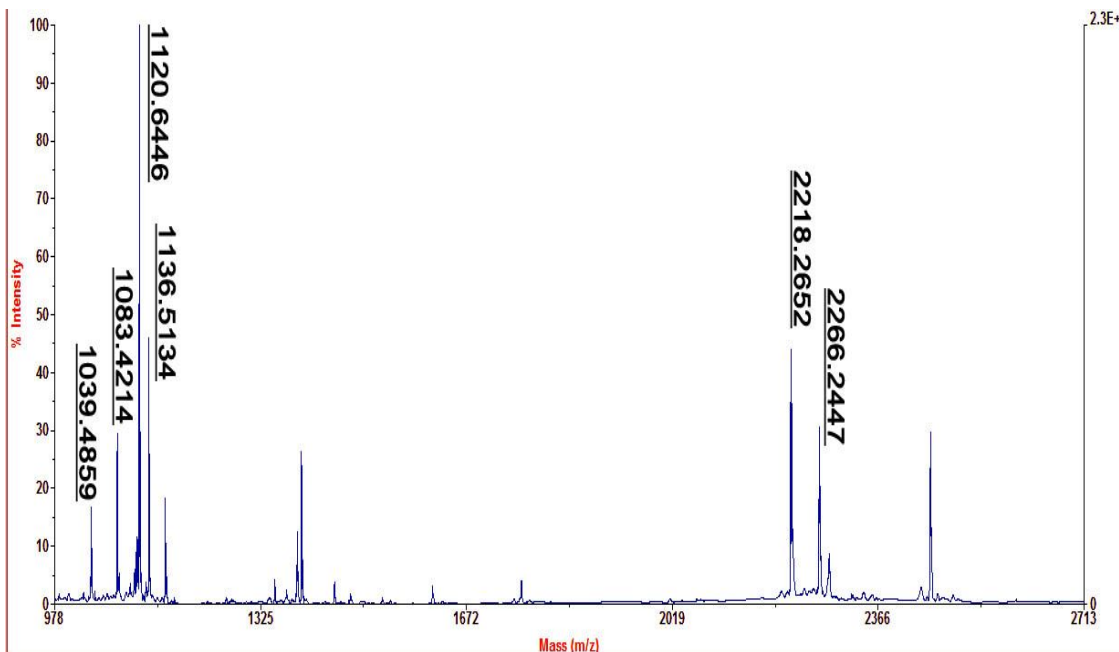

| Start - End | Observed  | Mr(expt)  | Mr(calc)  | Delta  | Miss Sequence   |
|-------------|-----------|-----------|-----------|--------|-----------------|
| 70 - 78     | 1120.6446 | 1119.6373 | 1119.6288 | 0.0085 | 1 K.REELFIVSK.L |

|           |           |           |           |         |   |                        |
|-----------|-----------|-----------|-----------|---------|---|------------------------|
| 79 - 86   | 1136.5134 | 1135.5061 | 1135.5121 | -0.0059 | 0 | K.LWCTYHEK.G           |
| 178 - 195 | 2218.2652 | 2217.2579 | 2217.0888 | 0.1691  | 0 | K.YKPAVNQIECHPYLTQEK.L |
| 196 - 203 | 1039.4859 | 1038.4786 | 1038.5168 | -0.0382 | 0 | K.LIQYCQSK.G           |
| 276 - 294 | 2266.2447 | 2265.2374 | 2265.0623 | 0.1751  | 0 | K.VDFELSSQDMTTLLSYNR.N |
| 309 - 316 | 1083.4214 | 1082.4141 | 1082.4345 | -0.0204 | 0 | K.DYPFHEEF.-           |

No match to: 1164.6175, 1393.7638, 2453.3857

#### 44) Peptidyl-prolyl cis-trans isomerase A

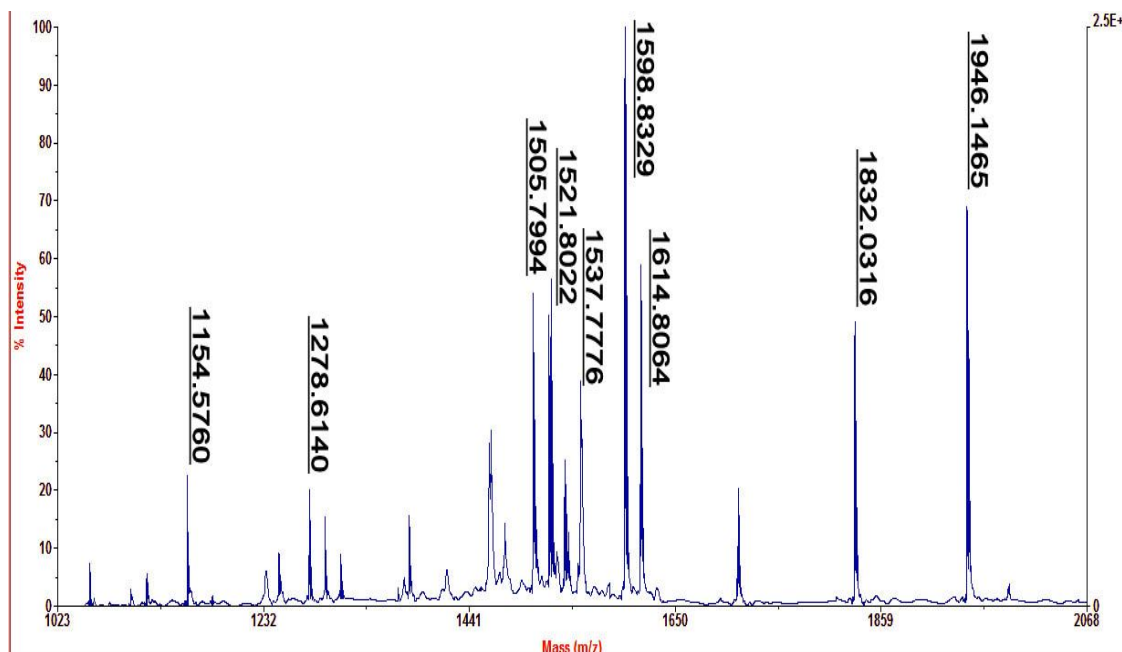

| Start - End | Observed  | Mr(expt)  | Mr(calc)  | Delta  | Miss Sequence                        |
|-------------|-----------|-----------|-----------|--------|--------------------------------------|
| 2 - 19      | 1946.1465 | 1945.1392 | 1944.9944 | 0.1447 | 0 M.VNPTVFFDIAVDGEPLGR.V             |
| 56 - 69     | 1598.8329 | 1597.8256 | 1597.7381 | 0.0875 | 0 R.IIPGFMCQGGDFTR.H                 |
| 56 - 69     | 1614.8064 | 1613.7991 | 1613.7330 | 0.0661 | 0 R.IIPGFMCQGGDFTR.H ; Oxidation (M) |
| 77 - 91     | 1832.0316 | 1831.0243 | 1830.9039 | 0.1204 | 1 K.SIYGEEKFEDENFILK.H               |
| 83 - 91     | 1154.5760 | 1153.5688 | 1153.5655 | 0.0033 | 0 K.FEDENFILK.H                      |
| 132 - 144   | 1505.7994 | 1504.7921 | 1504.7377 | 0.0544 | 1 K.VKEGMNIVEAMER.F                  |
| 132 - 144   | 1521.8022 | 1520.7949 | 1520.7326 | 0.0623 | 1 K.VKEGMNIVEAMER.F Oxidation (M)    |
| 132 - 144   | 1537.7776 | 1536.7703 | 1536.7275 | 0.0428 | 1 K.VKEGMNIVEAMER.F 2 Oxidation (M)  |
| 134 - 144   | 1278.6140 | 1277.6067 | 1277.5743 | 0.0324 | 0 K.EGMNIVEAMER.F                    |

No match to: 1461.1423, 1523.7859

45) Histidine triad nucleotide-binding protein 1

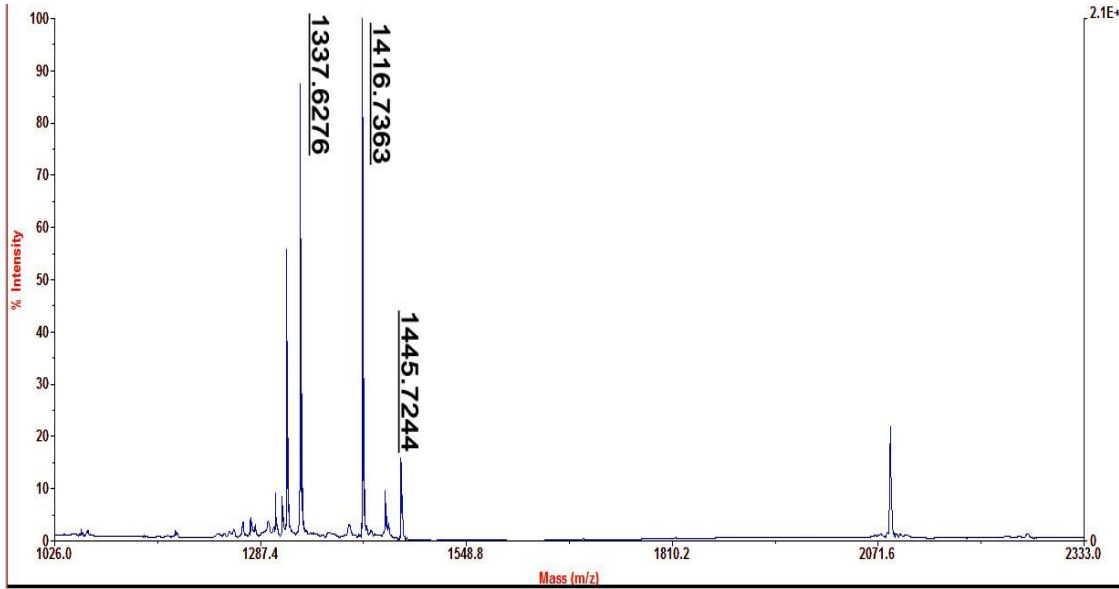

| Start - End | Observed  | Mr(expt)  | Mr(calc)  | Delta   | Miss Sequence       |
|-------------|-----------|-----------|-----------|---------|---------------------|
| 8 - 21      | 1416.7363 | 1415.7290 | 1415.7520 | -0.0230 | 0 K.AQVARPGDITFGK.I |
| 26 - 37     | 1445.7244 | 1444.7171 | 1444.7561 | -0.0390 | 1 K.EIPAKIIFEDDR.C  |
| 31 - 37     | 907.3805  | 906.3733  | 906.4447  | -0.0714 | 0 K.IIFEDDR.C       |
| 84 - 95     | 1337.6276 | 1336.6203 | 1336.6557 | -0.0354 | 1 K.CAADLGLNKGYS.M  |

No match to: 1274.6894, 1314.6226, 1320.5821, 1465.7336, 2086.1098

46) L-lactate dehydrogenase B chain

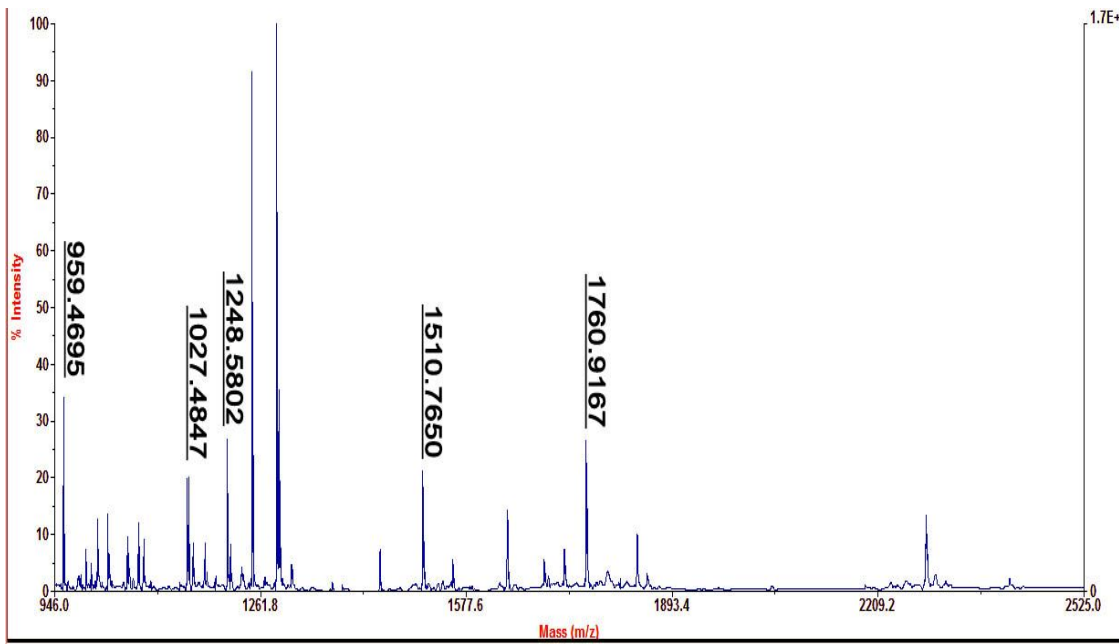

| Start - End | Observed  | Mr(expt)  | Mr(calc)  | Delta   | Miss Sequence                 |
|-------------|-----------|-----------|-----------|---------|-------------------------------|
| 78 - 91     | 1510.7650 | 1509.7577 | 1509.7674 | -0.0097 | 1 K.IVADKDYSVTANSK.I          |
| 92 - 100    | 913.5142  | 912.5069  | 912.5756  | -0.0687 | 0 K.IVVVTAGVR.Q               |
| 159 - 170   | 1248.5802 | 1247.5729 | 1247.5928 | -0.0199 | 0 R.VIGSGCNLDSAR.F            |
| 230 - 244   | 1760.9167 | 1759.9094 | 1759.9178 | -0.0084 | 1 K.EVHKMVVESAYEVIK.L         |
| 271 - 279   | 1027.4847 | 1026.4775 | 1026.5532 | -0.0757 | 0 R.IHPVSTMVK.G Oxidation (M) |
| 300 - 308   | 959.4695  | 958.4622  | 958.5447  | -0.0825 | 0 R.GLTSVINQK.L               |

No match to: 1149.5406, 1210.6269, 1286.6880, 1290.7086, 1639.9727

47) Transthyretin precursor

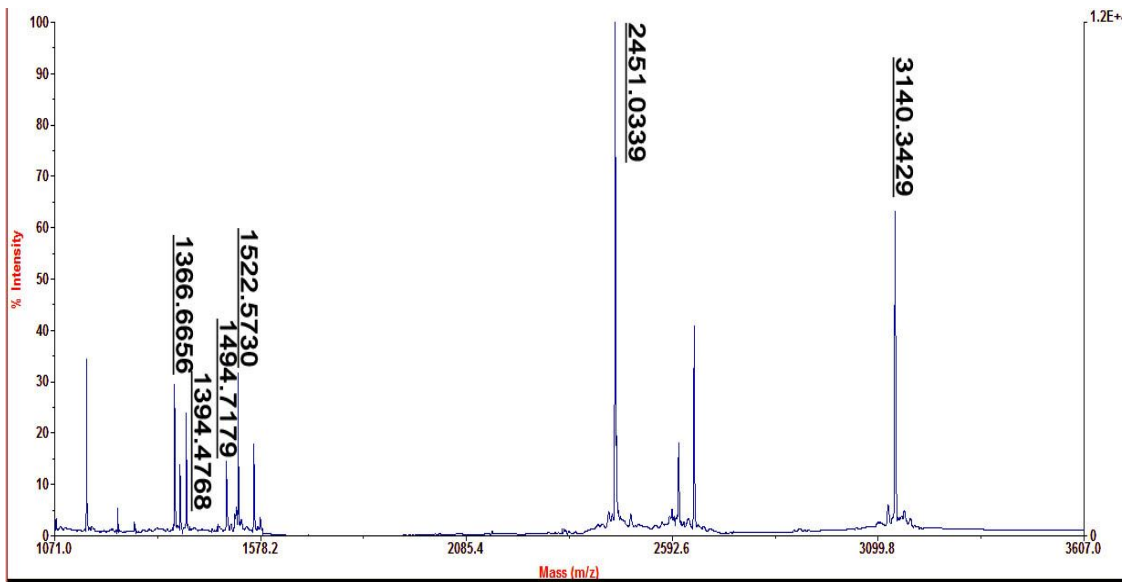

| Start - End | Observed  | Mr(expt)  | Mr(calc)  | Delta   | Miss Sequence                         |
|-------------|-----------|-----------|-----------|---------|---------------------------------------|
| 42 - 54     | 1366.6656 | 1365.6583 | 1365.7516 | -0.0933 | 0 R.GSPAINVAVHVFR.K                   |
| 42 - 55     | 1494.7179 | 1493.7106 | 1493.8466 | -0.1360 | 1 R.GSPAINVAVHVFRK.A                  |
| 55 - 68     | 1522.5730 | 1521.5657 | 1521.7099 | -0.1443 | 1 R.KAADDTWEPFASGK.T                  |
| 56 - 68     | 1394.4768 | 1393.4695 | 1393.6150 | -0.1455 | 0 K.AADDTWEPFASGK.T                   |
| 69 - 96     | 3140.3429 | 3139.3357 | 3139.5084 | -0.1727 | 1<br>K.TSESGELHGLTTEEEFVEGIYKVEIDTK.S |
| 101 - 123   | 2451.0339 | 2450.0266 | 2450.1978 | -0.1712 | 0 K.ALGISPFHEHAEEVVFTANDSGPR.R        |

No match to: 1149.4919, 2645.2055

48) 6-phosphogluconolactonase



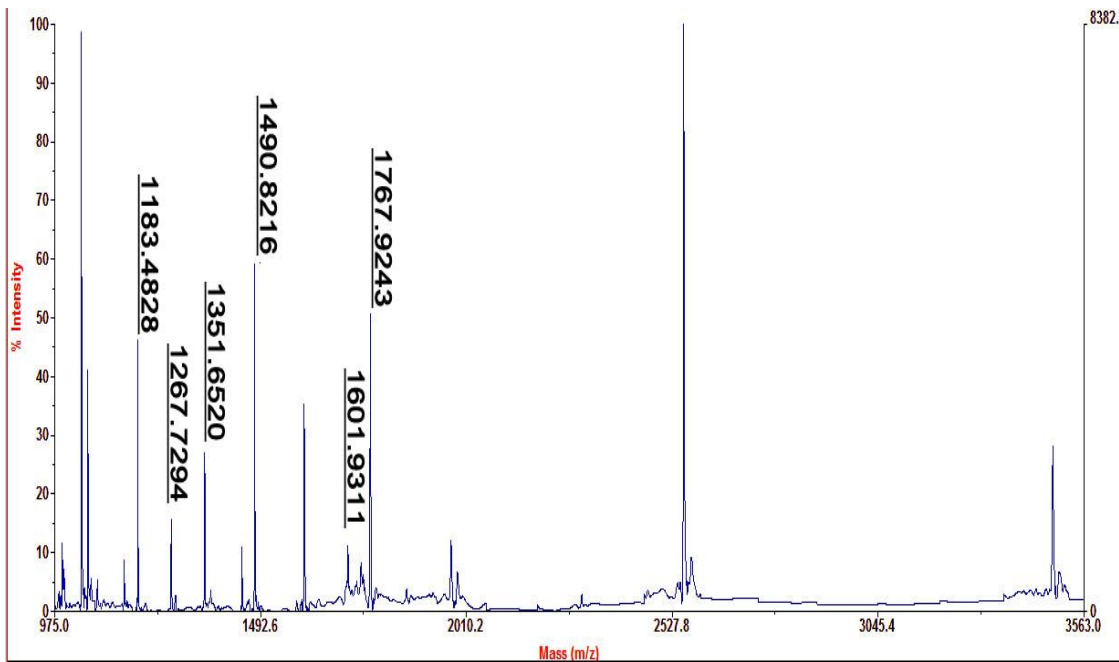

| Start - End | Observed  | Mr(expt)  | Mr(calc)  | Delta   | Miss Sequence          |
|-------------|-----------|-----------|-----------|---------|------------------------|
| 57 - 72     | 1490.8216 | 1489.8143 | 1489.8252 | -0.0109 | 0 R.ELPAAVAPAGPASLAR.W |
| 73 - 81     | 1183.4828 | 1182.4755 | 1182.5128 | -0.0373 | 0 R.WTLGFCDER.L        |
| 82 - 96     | 1767.9243 | 1766.9170 | 1766.8627 | 0.0543  | 0 R.LVPFDHAESTYGLYR.T  |
| 171 - 185   | 1601.9311 | 1600.9238 | 1600.8937 | 0.0302  | 0 K.IVAPISDSPKPPPQR.V  |
| 186 - 197   | 1267.7294 | 1266.7221 | 1266.7659 | -0.0438 | 0 R.VTLTLPVLNAAR.T     |
| 236 - 246   | 1351.6520 | 1350.6447 | 1350.6390 | 0.0057  | 0 K.LCWFLDEAAAR.L      |

No match to: 913.4206, 998.2748, 1042.5545, 1058.5319, 1458.6937, 1971.0707, 2555.4199

49) 78 kDa glucose-regulated protein

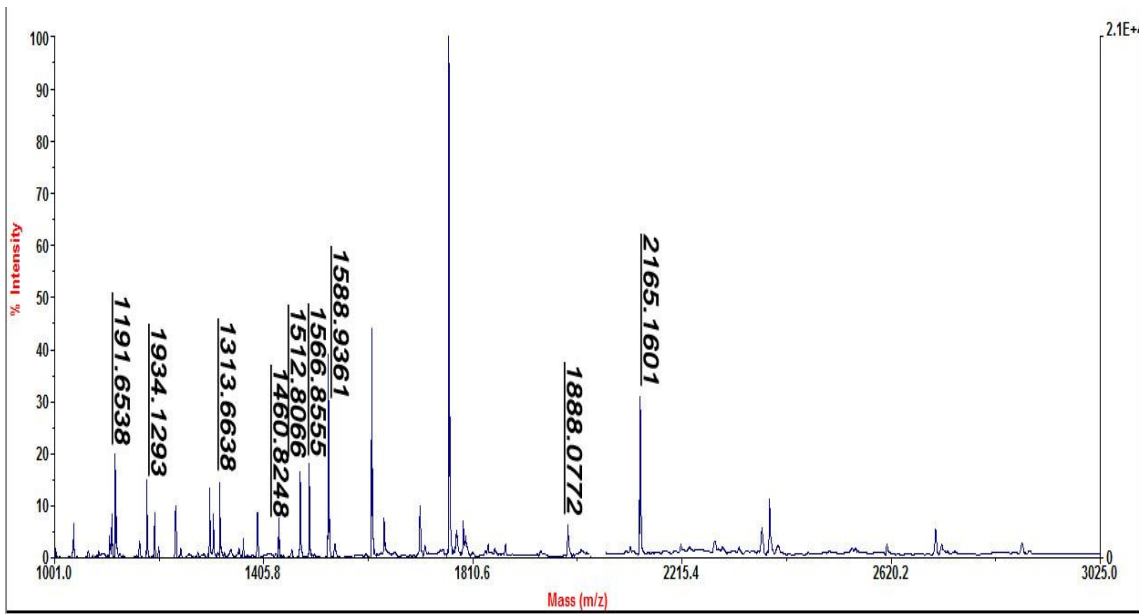

| Start - End | Observed  | Mr(expt)  | Mr(calc)  | Delta  | Miss Sequence            |
|-------------|-----------|-----------|-----------|--------|--------------------------|
| 61 - 74     | 1566.8555 | 1565.8482 | 1565.7725 | 0.0757 | 0 R.ITPSYVAFTPEGER.L     |
| 165 - 181   | 1888.0772 | 1887.0700 | 1886.9638 | 0.1061 | 0 K.VTHAVVTVPAYFNDAQR.Q  |
| 298 - 306   | 997.5322  | 996.5250  | 996.5101  | 0.0149 | 0 R.ALSSQHQR.I           |
| 307 - 324   | 2165.1601 | 2164.1528 | 2163.9847 | 0.1681 | 0 R.IEIESFYEGEDFSETLTR.A |
| 325 - 336   | 1512.8066 | 1511.7993 | 1511.7442 | 0.0551 | 1 R.AKFEELNMDLFR.S       |
| 327 - 336   | 1313.6638 | 1312.6565 | 1312.6121 | 0.0444 | 0 K.FEELNMDLFR.S         |
| 353 - 367   | 1588.9361 | 1587.9289 | 1587.8467 | 0.0821 | 1 K.KSDIDEIVLVGGSTR.I    |
| 354 - 367   | 1460.8248 | 1459.8175 | 1459.7518 | 0.0657 | 0 K.SDIDEIVLVGGSTR.I     |
| 465 - 474   | 1191.6538 | 1190.6465 | 1190.6295 | 0.0170 | 0 K.VYEGERPLTK.D         |
| 475 - 492   | 1934.1293 | 1933.1221 | 1933.0057 | 0.1163 | 0 K.DNHLLGTFDLTGIPPAPR.G |
| 602 - 617   | 1974.9910 | 1973.9837 | 1973.9007 | 0.0830 | 0 K.IEWLESHQDADIEDFK.A   |

No match to: 927.4941, 960.5595, 1211.5947, 1668.9296

50) Inorganic pyrophosphatase

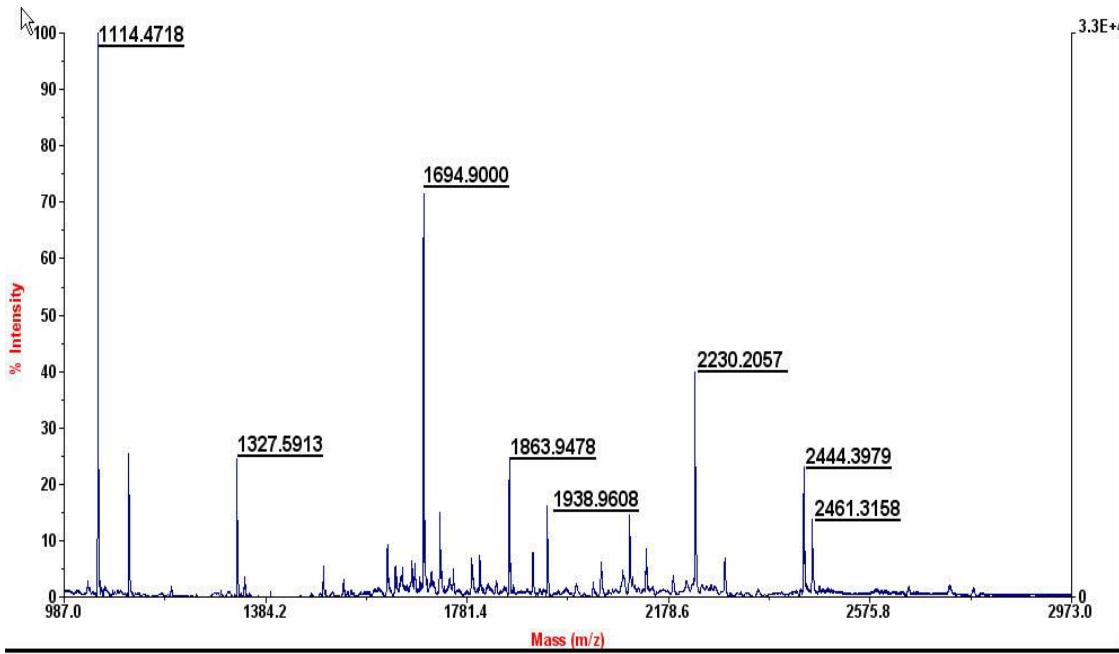

| Start - End | Observed  | Mr(expt)  | Mr(calc)  | Delta   | Miss Sequence                |
|-------------|-----------|-----------|-----------|---------|------------------------------|
| 10 - 18     | 1053.4165 | 1052.4093 | 1052.5291 | -0.1198 | 0 R.AAPFSLEYR.V              |
| 26 - 41     | 1863.9478 | 1862.9405 | 1862.9203 | 0.0203  | 0 K.GQYISPFHDIPIYADK.D       |
| 42 - 52     | 1327.5913 | 1326.5840 | 1326.6754 | -0.0914 | 0 K.DVFHMVVEVPR.W            |
| 80 - 88     | 1114.4718 | 1113.4645 | 1113.5858 | -0.1213 | 0 R.YVANLFPYK.G              |
| 89 - 109    | 2461.3158 | 2460.3085 | 2460.1134 | 0.1951  | 0 K.GYIWNYGAIPTWEDPGHNDK.H   |
| 156 - 177   | 2444.3979 | 2443.3907 | 2443.1979 | 0.1928  | 1 K.VIAINVDDPDAANYNDINDVKR.L |
| 178 - 191   | 1694.9000 | 1693.8927 | 1693.8827 | 0.0100  | 0 R.LKPGYLEATVDWFR.R         |
| 193 - 211   | 2230.2057 | 2229.1984 | 2229.0741 | 0.1243  | 1 R.YKVPDGKPENEFAFNAEFK.D    |
| 195 - 211   | 1938.9608 | 1937.9535 | 1937.9158 | 0.0376  | 0 K.VPDGKPENEFAFNAEFK.D      |

No match to: 927.3504, 954.2963, 1726.8779, 2101.1307

51 Transthyretin precursor

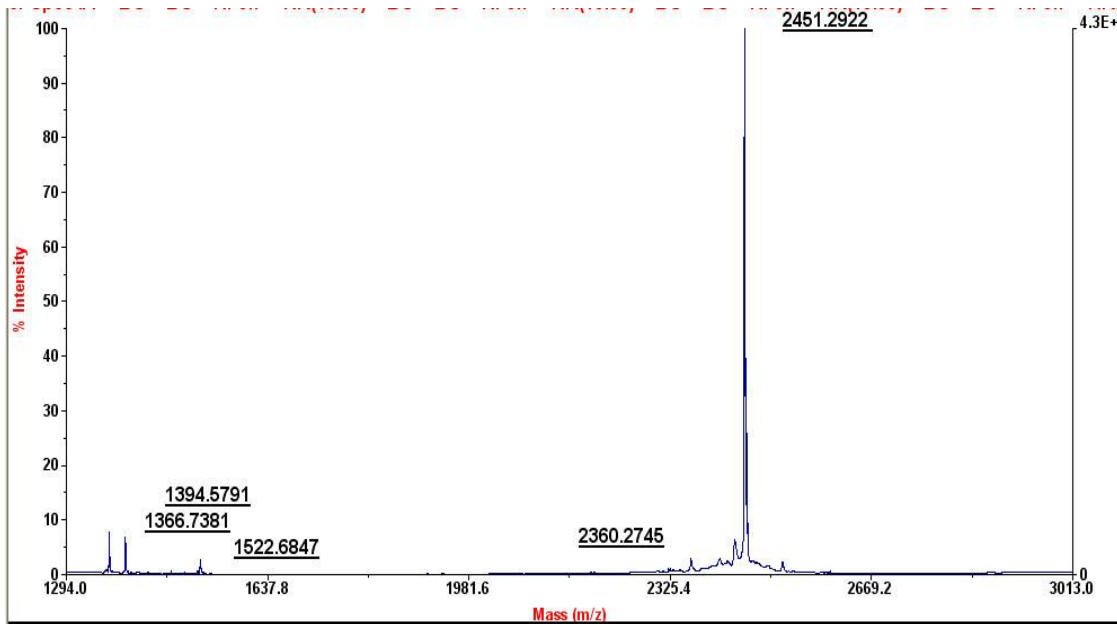

| Start - End | Observed  | Mr(expt)  | Mr(calc)  | Delta   | Miss Sequence                 |
|-------------|-----------|-----------|-----------|---------|-------------------------------|
| 42 - 54     | 1366.7381 | 1365.7309 | 1365.7516 | -0.0208 | 0 R.GSPAINVAVHVFR.K           |
| 55 - 68     | 1522.6847 | 1521.6774 | 1521.7099 | -0.0325 | 1 R.KAADDTWEPFASGK.T          |
| 56 - 68     | 1394.5791 | 1393.5719 | 1393.6150 | -0.0431 | 0 K.AADDTWEPFASGK.T           |
| 101 - 123   | 2451.2922 | 2450.2850 | 2450.1978 | 0.0872  | 0 K.ALGISPFHEHAEVVFTANDSGPR.R |
| 125 - 146   | 2360.2745 | 2359.2672 | 2359.2311 | 0.0361  | 0 R.YTIAALLSPYSYSTTAVVTNPK.E  |

## 52) Galactokinase

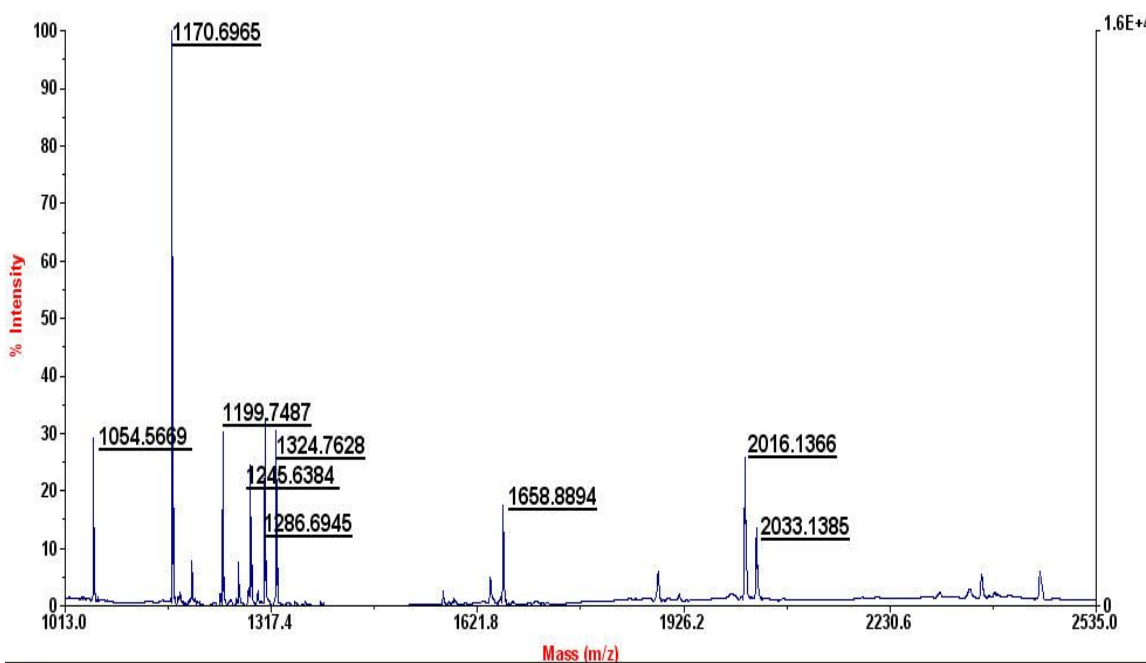

| Start - End | Observed  | Mr(expt)  | Mr(calc)  | Delta  | Miss Sequence              |
|-------------|-----------|-----------|-----------|--------|----------------------------|
| 6 - 17      | 1324.7628 | 1323.7555 | 1323.7146 | 0.0409 | 0 R.QPQVAELLAEAR.R         |
| 19 - 37     | 2033.1385 | 2032.1313 | 2032.0013 | 0.1300 | 1 R.AFREFFGAEPPELAVSAPGR.V |
| 22 - 37     | 1658.8894 | 1657.8822 | 1657.7947 | 0.0875 | 0 R.EEFGAEPPELAVSAPGR.V    |
| 69 - 87     | 2016.1366 | 2015.1293 | 2015.0171 | 0.1122 | 1 R.KDGLVSLTTTSEGADPEPQR.L |
| 88 - 97     | 1170.6965 | 1169.6892 | 1169.6557 | 0.0335 | 0 R.LQFPLPTAQR.S           |
| 196 - 204   | 1054.5669 | 1053.5596 | 1053.5389 | 0.0207 | 0 K.GHALLIDCR.S            |
| 218 - 228   | 1199.7487 | 1198.7415 | 1198.7033 | 0.0381 | 0 K.LAVLITNSNVR.H          |
| 229 - 239   | 1245.6384 | 1244.6311 | 1244.6149 | 0.0162 | 0 R.HSLASSEYPVR.R          |
| 257 - 267   | 1286.6945 | 1285.6872 | 1285.6513 | 0.0359 | 0 R.EVQLEEELEAAR.D         |

No match to: 1307.7265, 1886.9577

### 53) Nicotinate-nucleotide pyrophosphorylase

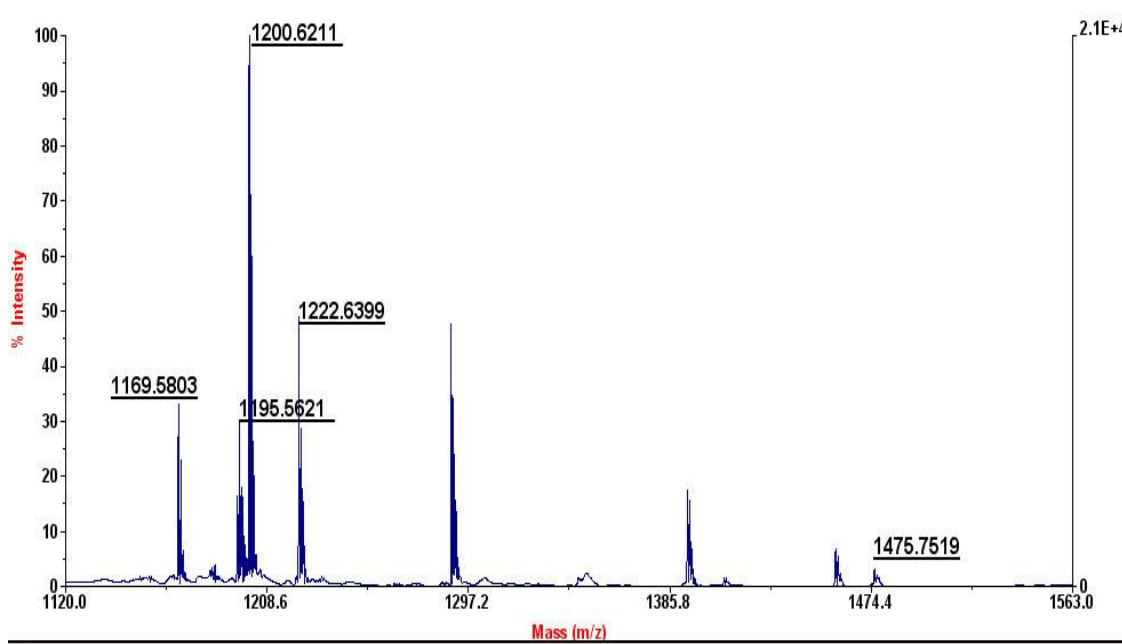

| Start - End | Observed  | Mr(expt)  | Mr(calc)  | Delta   | Miss Sequence         |
|-------------|-----------|-----------|-----------|---------|-----------------------|
| 92 - 102    | 1222.6399 | 1221.6327 | 1221.6288 | 0.0039  | 0 R.GPAHCLLLGER.V     |
| 111 - 126   | 1475.7519 | 1474.7446 | 1474.7198 | 0.0249  | 0 R.CSGIASAAAAVEAAR.G |
| 127 - 138   | 1169.5803 | 1168.5730 | 1168.5737 | -0.0007 | 0 R.GAGWTGHVAGTR.K    |
| 150 - 161   | 1200.6211 | 1199.6139 | 1199.6410 | -0.0272 | 0 K.YGLLVGGAASHR.Y    |
| 172 - 183   | 1195.5621 | 1194.5549 | 1194.5992 | -0.0444 | 0 K.DNHVVAAGGVEK.A    |

No match to: 1289.5931, 1393.5964, 1458.7245, 1748.9066, 1855.9294, 1871.9182

54) Lambda-crystallin homolog

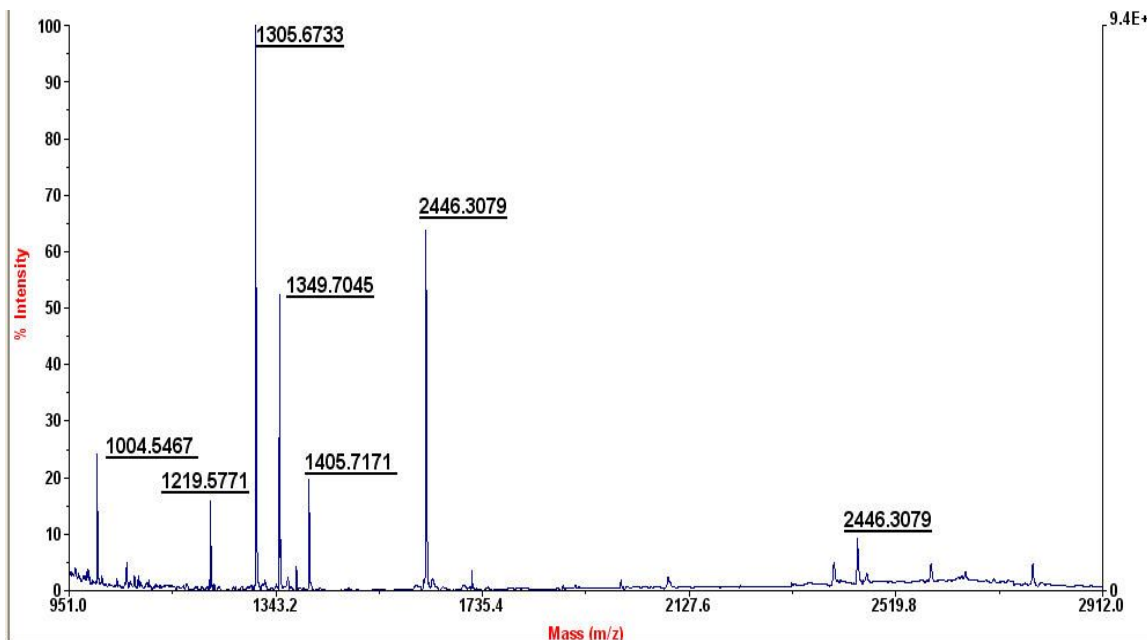

| Start - End | Observed  | Mr(expt)  | Mr(calc)  | Delta   | Miss | Sequence                   |
|-------------|-----------|-----------|-----------|---------|------|----------------------------|
| 34 - 43     | 1305.6733 | 1304.6660 | 1304.6724 | -0.0064 | 0    | K.LYDIEQQQIR.N             |
| 105 - 116   | 1405.7171 | 1404.7098 | 1404.7249 | -0.0150 | 0    | K.IFAQLDSIHDR.V            |
| 189 - 197   | 1004.5467 | 1003.5394 | 1003.5450 | -0.0056 | 0    | K.EVAGFVLNR.L              |
| 198 - 208   | 1349.7045 | 1348.6972 | 1348.7139 | -0.0167 | 0    | R.LQYAISEAWR.L             |
| 209 - 231   | 2446.3079 | 2445.3006 | 2445.2130 | 0.0876  | 0    | R.LVEEGIVSPSDLVMSSEGLGMR.Y |
| 261 - 274   | 1627.8652 | 1626.8579 | 1626.8518 | 0.0061  | 0    | K.HVLQTFGPIPEFSR.A         |
| 288 - 298   | 1219.5771 | 1218.5698 | 1218.5993 | -0.0295 | 0    | K.VPDDPEHLAAR.R            |
| 312 - 319   | 927.4600  | 926.4527  | 926.5185  | -0.0658 | 1    | K.LKSQVQPQ.-               |

No match to: 1381.7179, 1714.7737

55) Proteasome activator complex subunit 1

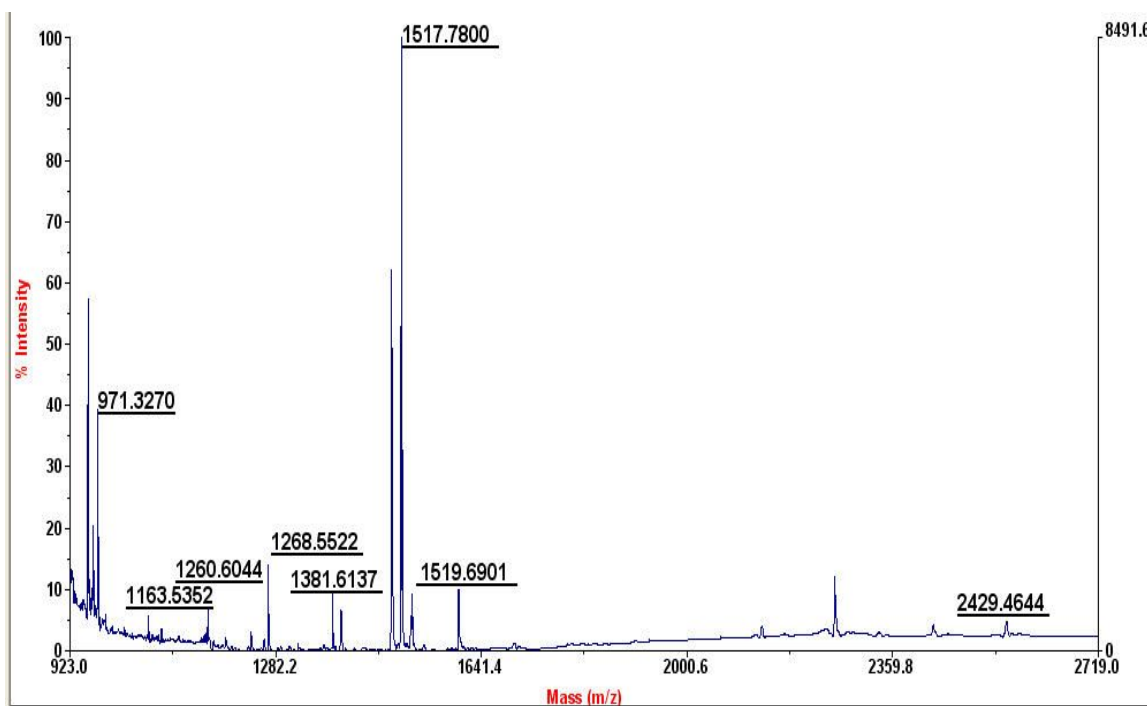

| Start - End | Observed  | Mr(expt)  | Mr(calc)  | Delta   | Miss Sequence                |
|-------------|-----------|-----------|-----------|---------|------------------------------|
| 14 - 24     | 1381.6137 | 1380.6064 | 1380.6707 | -0.0643 | 1 K.VDVFREDLCTK.T            |
| 25 - 35     | 1268.5522 | 1267.5450 | 1267.6448 | -0.0998 | 0 K.TENLLGSYFPK.K            |
| 36 - 45     | 1163.5352 | 1162.5279 | 1162.6597 | -0.1318 | 1 K.KISELDAFLK.E             |
| 37 - 58     | 2429.4644 | 2428.4571 | 2428.2849 | 0.1722  | 1 K.ISELDAFLKEPALNEANLSNLK.A |
| 59 - 70     | 1260.6044 | 1259.5971 | 1259.7125 | -0.1154 | 0 K.APLDIPVPDPVK.E           |
| 59 - 72     | 1517.7800 | 1516.7727 | 1516.8501 | -0.0774 | 1 K.APLDIPVPDPVKEK.E         |
| 142 - 155   | 1519.6901 | 1518.6829 | 1518.7314 | -0.0485 | 0 R.IEDGNNFGVAVQEK.V         |
| 167 - 176   | 1159.4649 | 1158.4576 | 1158.6033 | -0.1457 | 0 K.LEGFHTQISK.Y             |
| 191 - 198   | 971.3270  | 970.3197  | 970.4621  | -0.1423 | 0 K.QPHVGDYR.Q               |
| 199 - 210   | 1501.6923 | 1500.6850 | 1500.7208 | -0.0358 | 0 R.QLVHELDEAEYR.D           |
| 214 - 220   | 907.3074  | 906.3001  | 906.4667  | -0.1665 | 0 R.LMVMEIR.N Oxidation (M)  |
| 221 - 232   | 1395.6839 | 1394.6766 | 1394.7809 | -0.1043 | 0 R.NAYAVLYDIILK.N           |

No match to: 954.2988, 963.3323, 1239.5553, 1484.6568, 1601.8316, 2129.9870, 2258.1295, 2557.5716

56) Aldose 1-epimerase

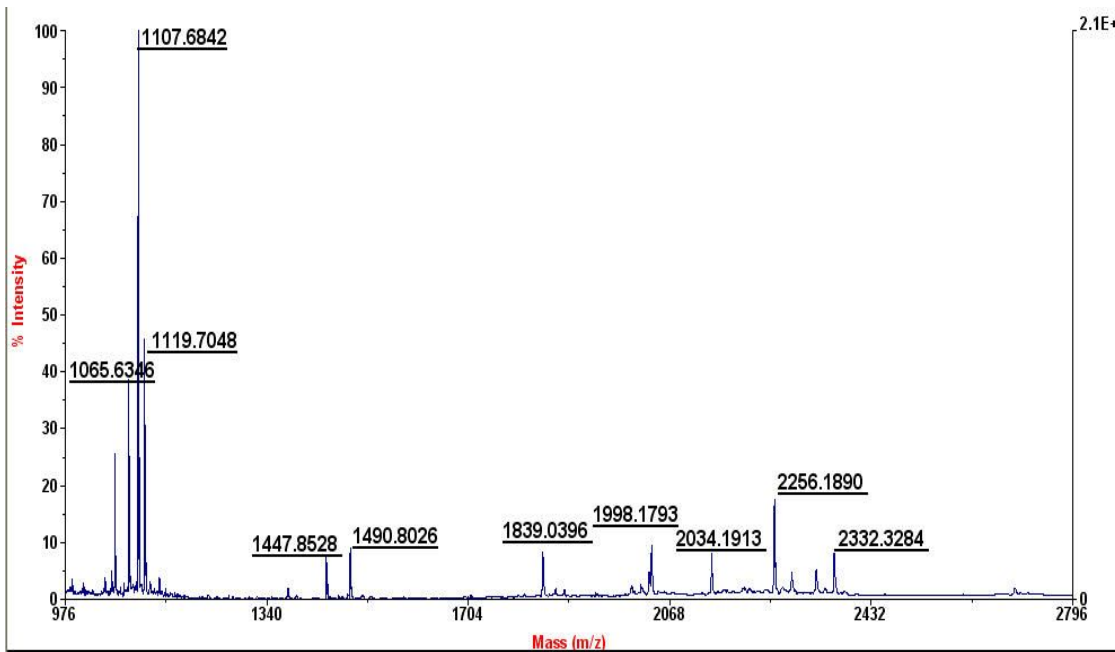

| Start - End | Observed  | Mr(expt)  | Mr(calc)  | Delta  | Miss Sequence              |
|-------------|-----------|-----------|-----------|--------|----------------------------|
| 7 - 21      | 1447.8528 | 1446.8456 | 1446.7354 | 0.1102 | 0 R.AVFGELPSGGGTVEK.F      |
| 22 - 30     | 1119.7048 | 1118.6975 | 1118.6084 | 0.0891 | 0 K.FQLQSDLLR.V            |
| 52 - 68     | 1839.0396 | 1838.0323 | 1837.9461 | 0.0862 | 0 R.ASDVVLGFAELEGYLQK.Q    |
| 69 - 78     | 1107.6842 | 1106.6770 | 1106.5872 | 0.0897 | 0 K.QPYFGAVIGR.V           |
| 94 - 111    | 2034.1913 | 2033.1841 | 2033.0442 | 0.1399 | 1 K.EYHLAINKEPNSLHGGVR.G   |
| 102 - 111   | 1065.6346 | 1064.6273 | 1064.5363 | 0.0910 | 0 K.EPNSLHGGVR.G           |
| 132 - 145   | 1490.8026 | 1489.7954 | 1489.6936 | 0.1018 | 0 R.ISPDGEEGYPGELK.V       |
| 146 - 162   | 1998.1793 | 1997.1720 | 1997.0258 | 0.1462 | 0 K.VWVTYTLDGGELIVNYR.A    |
| 301 - 319   | 2256.1890 | 2255.1817 | 2255.0178 | 0.1639 | 0 K.HSGFCLETQNWPDVAVNQPR.F |
| 320 - 338   | 2332.3284 | 2331.3211 | 2331.1687 | 0.1523 | 0 R.FPPVLLRPGEEYDHTTWFK.F  |

No match to: 1090.6630, 2288.1638, 2364.3200

57) Alcohol dehydrogenase



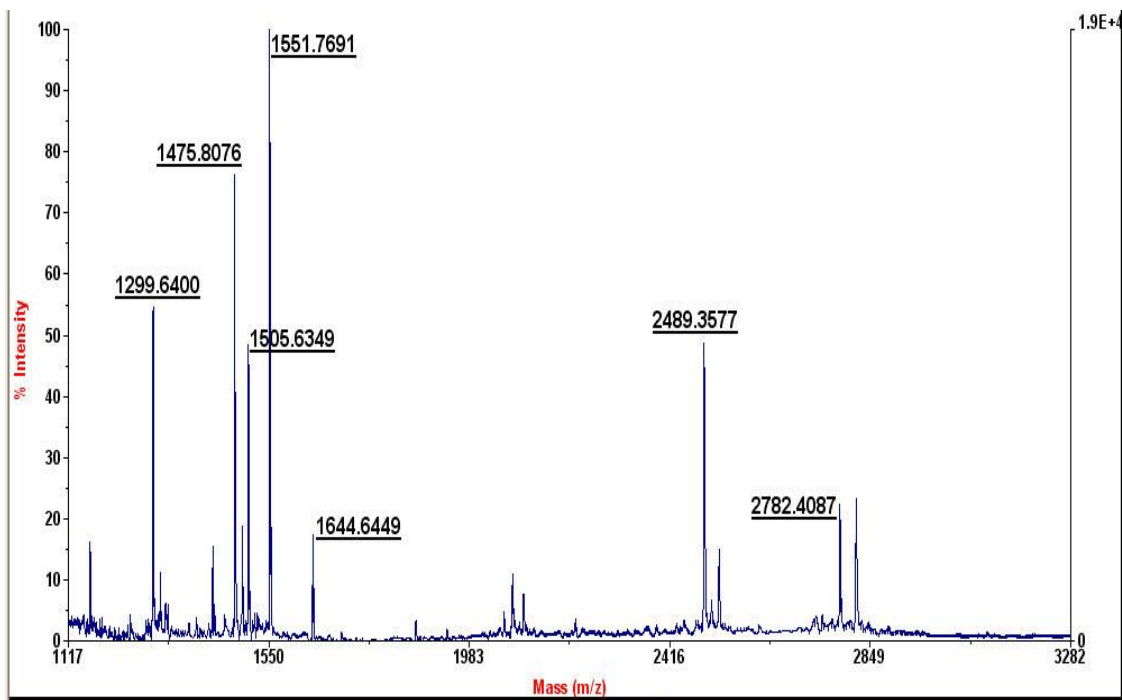

| Start - End                          | Observed  | Mr(expt)  | Mr(calc)  | Delta   | Miss Sequence                |
|--------------------------------------|-----------|-----------|-----------|---------|------------------------------|
| 35 - 42                              | 928.4605  | 927.4532  | 927.4814  | -0.0281 | 0 K.YALSVGYR.H               |
| 43 - 68                              | 2782.4087 | 2781.4014 | 2781.3279 | 0.0735  | 1                            |
| <b>R.HIDCAAIYGNPEIGEALKEDVGPGK.A</b> |           |           |           |         |                              |
| 86 - 96                              | 1299.6400 | 1298.6327 | 1298.6367 | -0.0040 | 0 K.HHPEDVEPALR.K            |
| 128 - 141                            | 1644.6449 | 1643.6376 | 1643.6886 | -0.0510 | 0 K.NADGTICYDSTHYK.E         |
| 154 - 167                            | 1475.8076 | 1474.8003 | 1474.7892 | 0.0111  | 0 K.GLVQALGLSNFNSR.Q         |
| 204 - 218                            | 1551.7691 | 1550.7618 | 1550.7576 | 0.0042  | 0 R.GLEVTAYSPLGSSDR.A        |
| 219 - 240                            | 2489.3577 | 2488.3504 | 2488.3213 | 0.0291  | 1 R.AWRDPDEPVLLEEPVVLALAEK.Y |
| 313 - 325                            | 1505.6349 | 1504.6276 | 1504.6623 | -0.0346 | 0 R.DAGHPLYPFNDPY.-          |

58) Aflatoxin B1 aldehyde reductase member 2

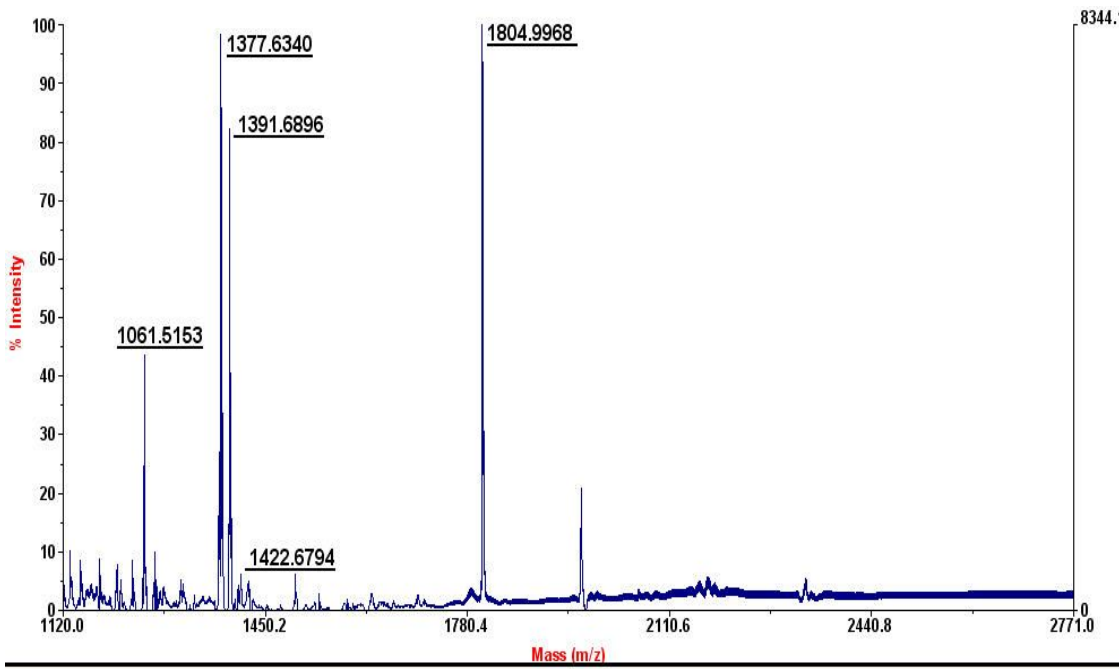

| Start - End | Observed  | Mr(expt)  | Mr(calc)  | Delta   | Miss Sequence                     |
|-------------|-----------|-----------|-----------|---------|-----------------------------------|
| 38 - 50     | 1422.6794 | 1421.6721 | 1421.7118 | -0.0397 | 1 R.VASVLGTMEMGRR.M Oxidation (M) |
| 121 - 129   | 1061.5153 | 1060.5080 | 1060.5876 | -0.0796 | 1 R.SQLETSLKR.L                   |
| 206 - 216   | 1391.6896 | 1390.6824 | 1390.6915 | -0.0091 | 0 R.QVETELFPCLR.H                 |
| 251 - 261   | 1377.6340 | 1376.6267 | 1376.6149 | 0.0118  | 0 R.FFGNSWAETYR.N                 |
| 279 - 297   | 1804.9968 | 1803.9895 | 1803.9478 | 0.0416  | 0 K.ALQAAYGASAPSVTSAALR.W         |

No match to: 1251.5709, 1276.6266, 1499.6726, 1966.0338

59) Malate dehydrogenase,

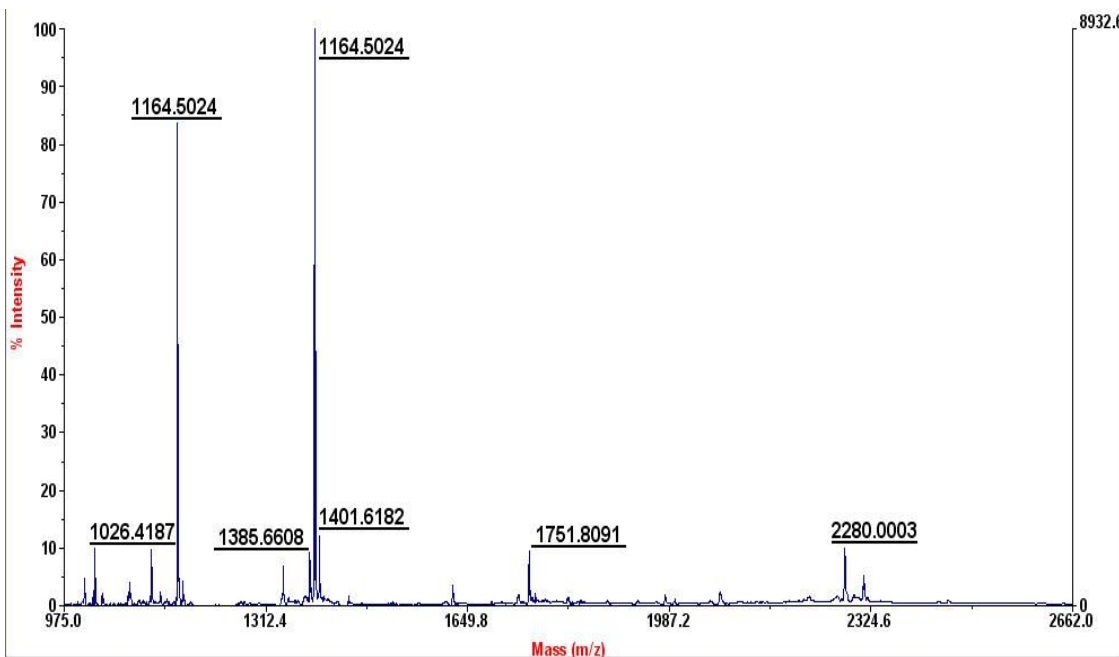

| Start - End | Observed | Mr(expt) | Mr(calc) | Delta | Miss Sequence |
|-------------|----------|----------|----------|-------|---------------|
|-------------|----------|----------|----------|-------|---------------|

|           |           |           |           |         |   |                                 |
|-----------|-----------|-----------|-----------|---------|---|---------------------------------|
| 80 - 92   | 1385.6608 | 1384.6536 | 1384.7384 | -0.0848 | 0 | K.DLDVAILVGSMPR.R               |
| 80 - 92   | 1401.6182 | 1400.6110 | 1400.7333 | -0.1223 | 0 | K.DLDVAILVGSMPR.R Oxidation (M) |
| 150 - 157 | 1026.4187 | 1025.4114 | 1025.4600 | -0.0486 | 0 | K.ENFSCLTR.L                    |
| 180 - 199 | 2280.0003 | 2278.9930 | 2279.1083 | -0.1153 | 0 | K.NVIIWGNHSSTQYPDVNHAK.V        |
| 206 - 220 | 1751.8091 | 1750.8018 | 1750.8777 | -0.0759 | 1 | K.EVGVYEALKDDSWLK.G             |
| 221 - 230 | 1164.5024 | 1163.4952 | 1163.5934 | -0.0983 | 0 | K.GEFVTTVQQR.G                  |
| 299 - 310 | 1393.6136 | 1392.6063 | 1392.7037 | -0.0974 | 0 | K.FVEGLPINDFSR.E                |

No match to: 1120.5504, 1173.5001, 1340.8753, 1376.5317, 2311.9881

### 60) Phosphoglycerate mutase 1

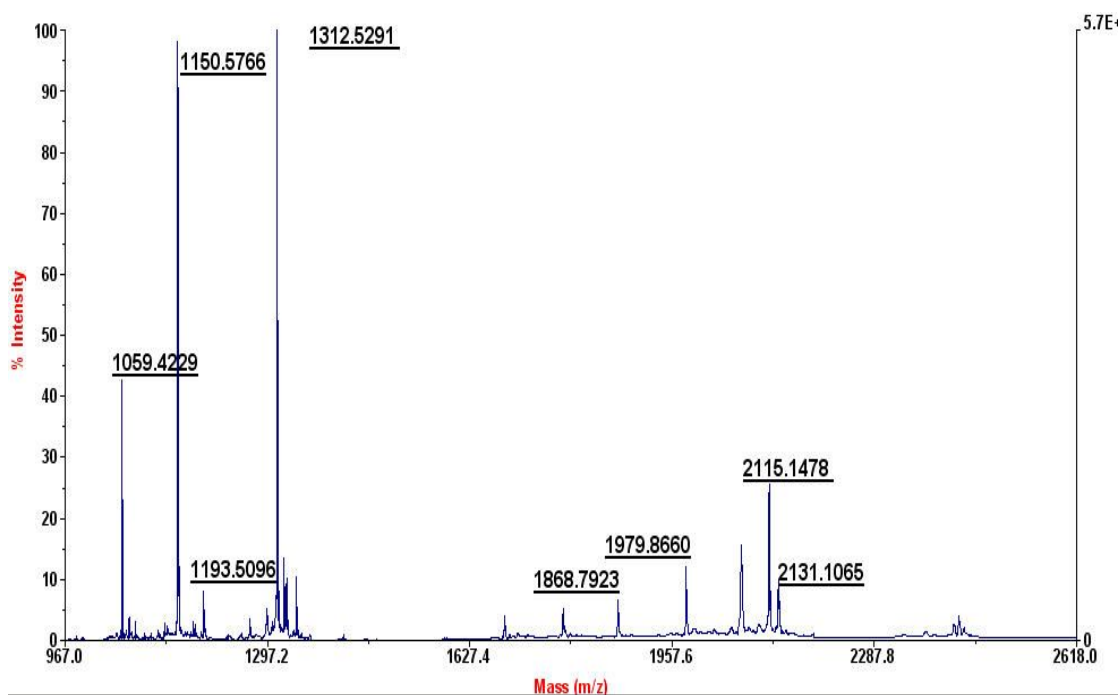

| Start - End | Observed  | Mr(expt)  | Mr(calc)  | Delta   | Miss Sequence                 |
|-------------|-----------|-----------|-----------|---------|-------------------------------|
| 1 - 10      | 1193.5096 | 1192.5024 | 1192.7001 | -0.1978 | 1 -.MAAYKLVLR.H Oxidation (M) |
| 11 - 21     | 1312.5291 | 1311.5218 | 1311.5956 | -0.0738 | 0 R.HGESAWNLENR.F             |
| 22 - 39     | 1979.8660 | 1978.8587 | 1978.8697 | -0.0109 | 0 R.FSGWYDADLSPAGHEEAK.R      |
| 91 - 100    | 1059.4229 | 1058.4157 | 1058.5508 | -0.1352 | 0 R.HYGGLTGLNK.A              |
| 142 - 157   | 1868.7923 | 1867.7850 | 1867.8509 | -0.0659 | 0 R.YADLTEDQLPSCESLK.D        |
| 181 - 191   | 1150.5766 | 1149.5694 | 1149.6618 | -0.0924 | 0 R.VLIAAHGNSLR.G             |

|           |           |           |           |         |   |                        |
|-----------|-----------|-----------|-----------|---------|---|------------------------|
| 223 - 240 | 2115.1478 | 2114.1405 | 2114.1193 | 0.0211  | 0 | K.NLKPIKPMQFLGDEETVR.K |
| 223 - 240 | 2131.1065 | 2130.0992 | 2130.1143 | -0.0151 | 0 | K.NLKPIKPMQFLGDEETVR.K |

Oxidation (M)

No match to: 1324.5223, 1344.4945, 2070.2202

61) Carbonic anhydrase 1

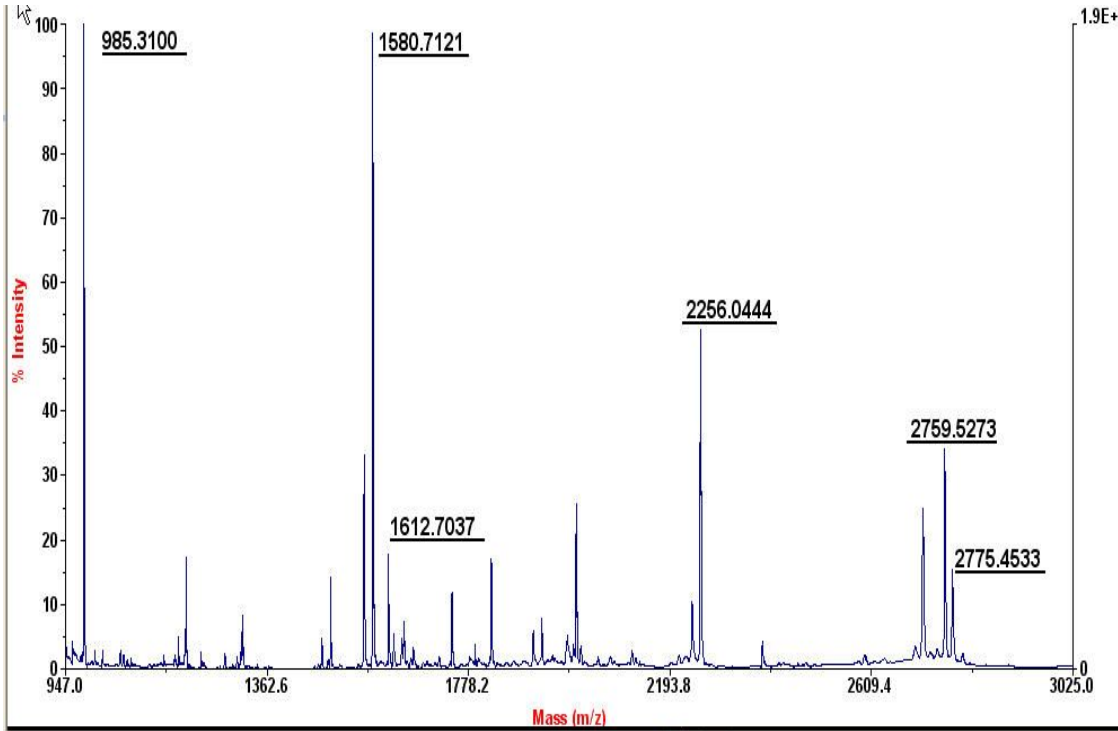

| Start - End | Observed  | Mr(expt)  | Mr(calc)  | Delta   | Miss Sequence                 |
|-------------|-----------|-----------|-----------|---------|-------------------------------|
| 59 - 77     | 2256.0444 | 2255.0371 | 2255.0355 | 0.0016  | 0 K.EIINVGHSHVNFEDNDNR.S      |
| 82 - 90     | 985.3100  | 984.3027  | 984.4301  | -0.1274 | 0 K.GGPFSDSYR.L               |
| 115 - 128   | 1612.7037 | 1611.6964 | 1611.7793 | -0.0829 | 0 K.YSAELHVAHWNSAK.Y          |
| 215 - 228   | 1580.7121 | 1579.7049 | 1579.7841 | -0.0793 | 0 K.ESISVSSEQLAQFR.S          |
| 229 - 253   | 2759.5273 | 2758.5200 | 2758.3820 | 0.1380  | 0                             |
|             |           |           |           |         | R.SLLSNVEGDNAVPMQHNNRPTQPLK.G |
| 229 - 253   | 2775.4533 | 2774.4461 | 2774.3769 | 0.0692  | 0                             |

R.SLLSNVEGDNAVPMQHNNRPTQPLK.G Oxidation (M)

62) Triosephosphate isomerase

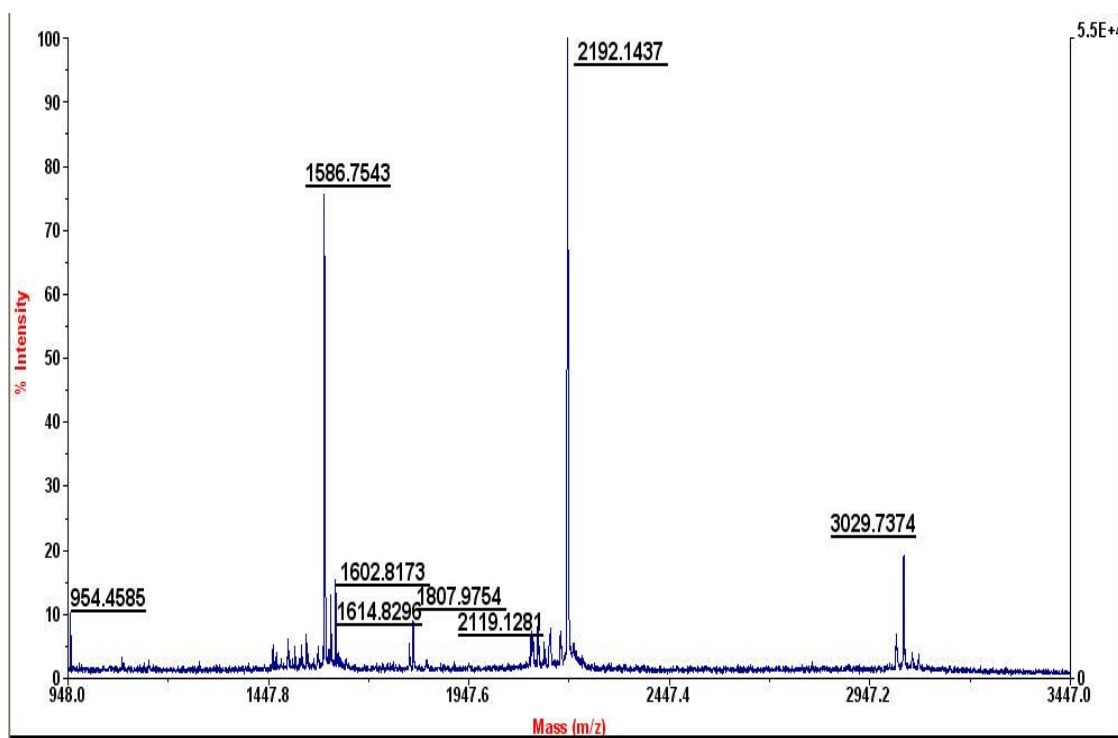

| Start - End | Observed  | Mr(expt)  | Mr(calc)  | Delta   | Miss Sequence              |
|-------------|-----------|-----------|-----------|---------|----------------------------|
| 7 - 14      | 954.4585  | 953.4513  | 953.4759  | -0.0246 | 0 K.FFVGGNWK.M             |
| 34 - 53     | 2192.1437 | 2191.1364 | 2191.0619 | 0.0745  | 0 K.VPADTEVVCAPPTAYIDFAR.Q |
| 86 - 99     | 1586.7543 | 1585.7470 | 1585.7307 | 0.0164  | 0 K.DCGATWVVLGHSER.R       |
| 100 - 113   | 1614.8296 | 1613.8223 | 1613.8161 | 0.0062  | 1 R.RHVFGESDELIGQK.V       |
| 114 - 131   | 1807.9754 | 1806.9681 | 1806.9661 | 0.0020  | 0 K.VAHALAEGLGVIACIGEK.L   |
| 157 - 175   | 2119.1281 | 2118.1208 | 2118.1149 | 0.0059  | 1 K.DWSKVVLAYEPVWAIGTGK.T  |
| 161 - 175   | 1602.8173 | 1601.8100 | 1601.8817 | -0.0716 | 0 K.VVLAYEPVWAIGTGK.T      |
| 220 - 248   | 3029.7374 | 3028.7301 | 3028.5756 | 0.1545  | 0                          |

K.ELASQPDVDGFLVGGASLKPEFVDIINAK.Q

63) Peptidyl-prolyl cis-trans isomerase A

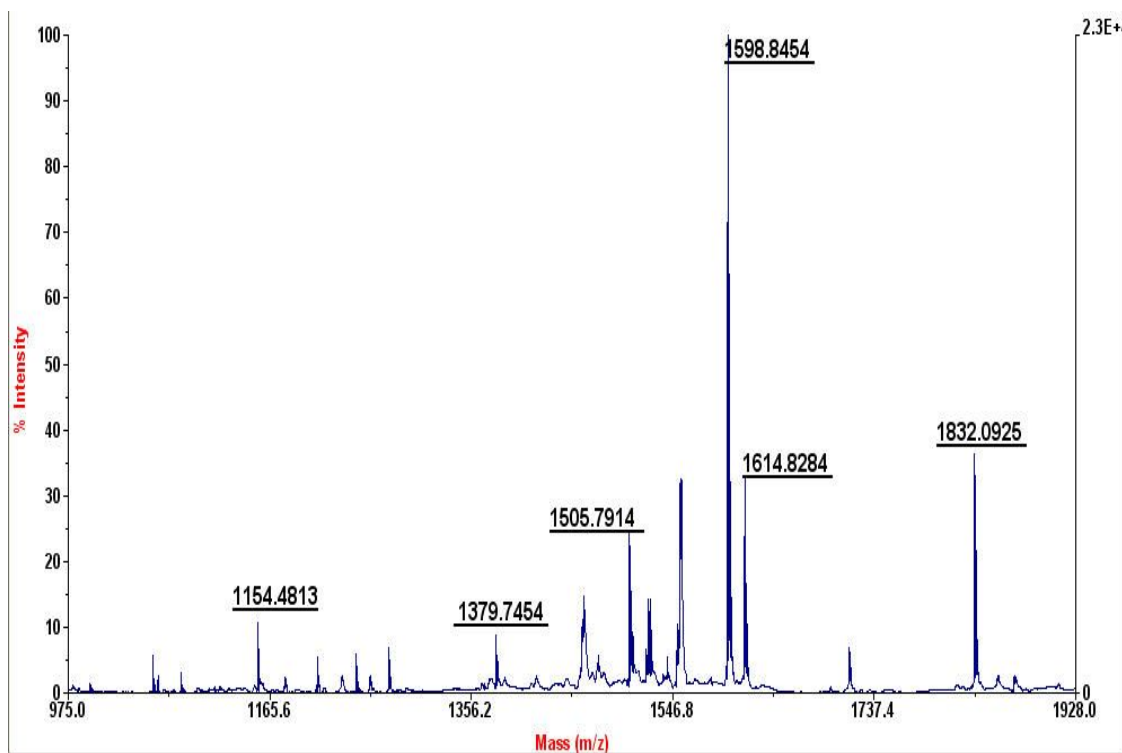

| Start - End | Observed  | Mr(expt)  | Mr(calc)  | Delta   | Miss Sequence                        |
|-------------|-----------|-----------|-----------|---------|--------------------------------------|
| 20 - 31     | 1379.7454 | 1378.7381 | 1378.7496 | -0.0115 | 1 R.VSFELFADKVPK.T                   |
| 56 - 69     | 1598.8454 | 1597.8381 | 1597.7381 | 0.1000  | 0 R.IIPGFMCQGGDFTR.H                 |
| 56 - 69     | 1614.8284 | 1613.8212 | 1613.7330 | 0.0882  | 0 R.IIPGFMCQGGDFTR.H ; Oxidation (M) |
| 77 - 91     | 1832.0925 | 1831.0853 | 1830.9039 | 0.1814  | 1 K.SIYGEEKFEDENFILK.H               |
| 83 - 91     | 1154.4813 | 1153.4740 | 1153.5655 | -0.0915 | 0 K.FEDENFILK.H                      |
| 132 - 144   | 1505.7914 | 1504.7841 | 1504.7377 | 0.0464  | 1 K.VKEGMNIVEAMER.F                  |

No match to: 1523.7634, 1554.0185, 1713.9247, 1946.2642, 1988.2967

64) Peroxiredoxin-1

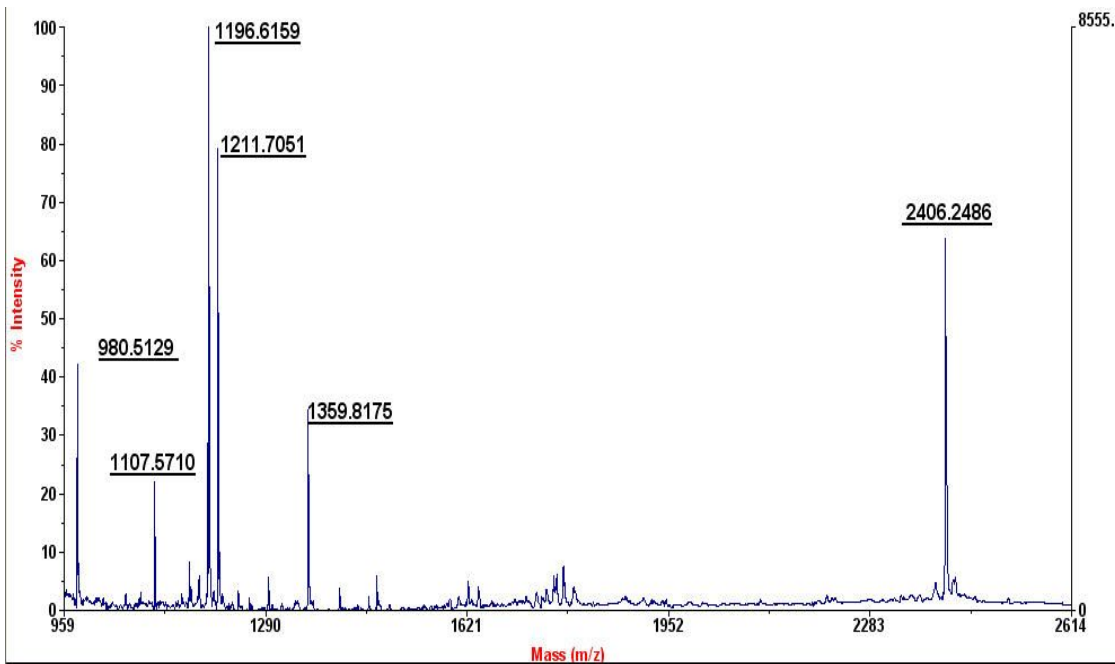

| Start - End | Observed  | Mr(expt)  | Mr(calc)  | Delta   | Miss Sequence                |
|-------------|-----------|-----------|-----------|---------|------------------------------|
| 8 - 16      | 980.5129  | 979.5056  | 979.5239  | -0.0183 | 0 K.IGHPAPNFK.A              |
| 111 - 120   | 1107.5710 | 1106.5637 | 1106.5971 | -0.0334 | 0 R.TIAQDYGVLK.A             |
| 129 - 140   | 1359.8175 | 1358.8102 | 1358.7921 | 0.0181  | 1 R.GLFIIDDKGILR.Q           |
| 141 - 151   | 1211.7051 | 1210.6978 | 1210.6669 | 0.0309  | 0 R.QITVNDLPVGR.S            |
| 159 - 168   | 1196.6159 | 1195.6086 | 1195.6237 | -0.0151 | 0 R.LVQAFQFTDK.H             |
| 169 - 190   | 2406.2486 | 2405.2414 | 2405.1797 | 0.0616  | 0 K.HGEVCPAGWKPGSDTIKPDVQK.S |

No match to: 922.4665, 1194.6617

65) Flavin reductase

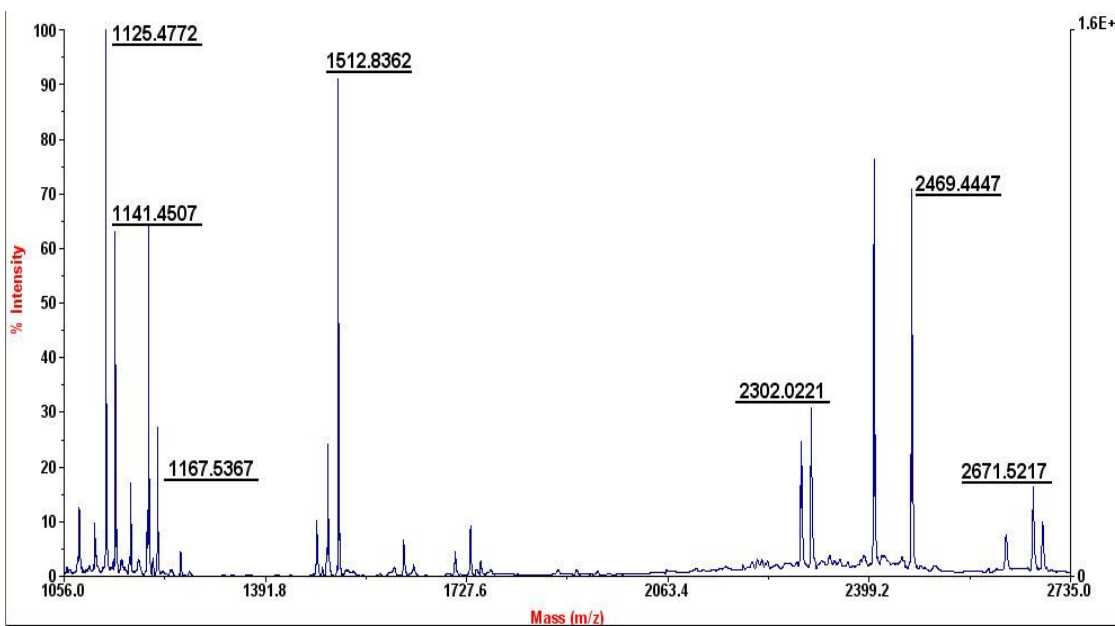

| Start - End | Observed | Mr(expt) | Mr(calc) | Delta | Miss Sequence |
|-------------|----------|----------|----------|-------|---------------|
|-------------|----------|----------|----------|-------|---------------|

40 - 63 2469.4447 2468.4375 2468.3022 0.1352 0

R.LPSEGPRPAHVVVGDVLAADVDK.T

64 - 78 1512.8362 1511.8289 1511.8671 -0.0382 0 K.TVAGQDAVIVLLGTR.N

125 - 134 1167.5367 1166.5294 1166.6044 -0.0750 0 R.LQAVTDDHIR.M

146 - 170 2671.5217 2670.5144 2670.3475 0.1669 0

K.YVAVMPPHIGDQPLTGAYTVTLDGR.G

179 - 187 1125.4772 1124.4699 1124.5549 -0.0850 0 K.HDLGHFMLR.C

179 - 187 1141.4507 1140.4434 1140.5498 -0.1064 0 K.HDLGHFMLR.C Oxidation (M)

188 - 206 2302.0221 2301.0148 2300.9280 0.0868 0 R.CLTTDEYDGHSTYPHQYQ.-

No match to: 980.4153, 1037.4595, 1196.5386, 1211.6023, 1495.7211, 2284.9594, 2406.2787

66) Adenylate kinase isoenzyme 1

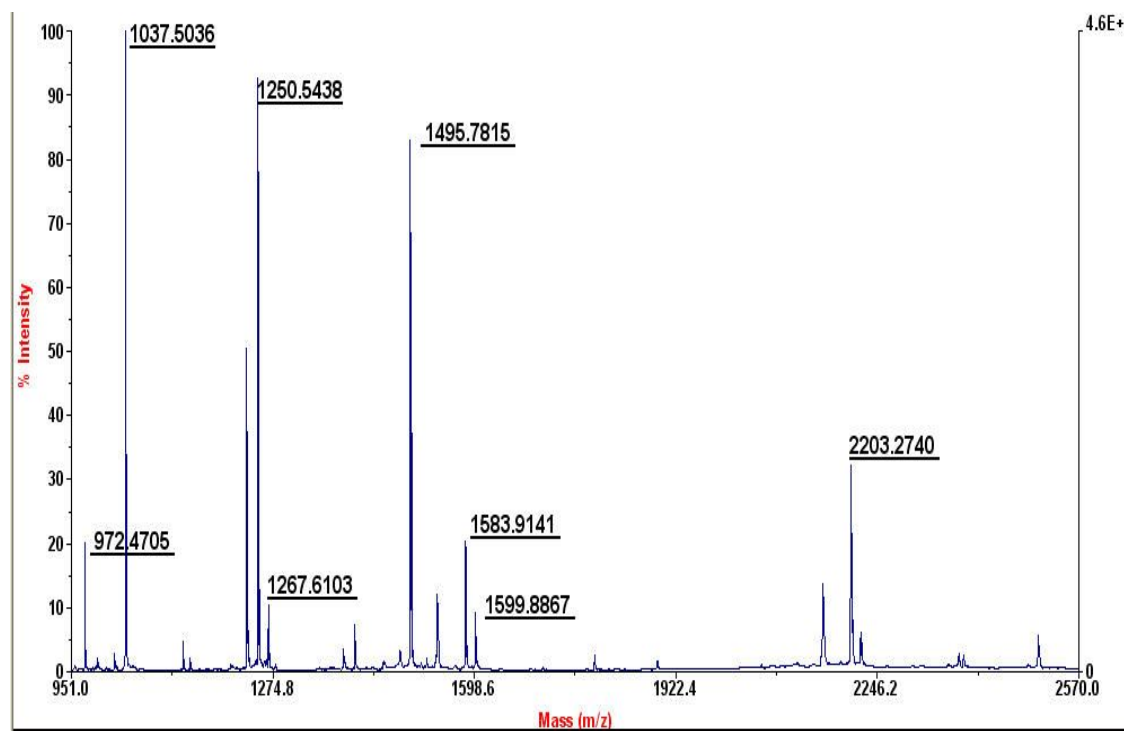

| Start - End | Observed  | Mr(expt)  | Mr(calc)  | Delta  | Miss Sequence                  |
|-------------|-----------|-----------|-----------|--------|--------------------------------|
| 32 - 44     | 1495.7815 | 1494.7742 | 1494.7467 | 0.0275 | 0 K.YGYTHLSTGDLLR.S            |
| 64 - 77     | 1583.9141 | 1582.9068 | 1582.8752 | 0.0316 | 0 K.GQLVPLETVLDMLR.D           |
| 64 - 77     | 1599.8867 | 1598.8794 | 1598.8701 | 0.0093 | 0 K.GQLVPLETVLDMLR.D Oxidation |

(M)



|           |           |           |           |         |   |                          |
|-----------|-----------|-----------|-----------|---------|---|--------------------------|
| 89 - 97   | 1037.5036 | 1036.4963 | 1036.5341 | -0.0379 | 0 | K.GFLIDGYPR.E            |
| 98 - 107  | 1250.5438 | 1249.5366 | 1249.5574 | -0.0209 | 0 | R.EVQQGEEFER.R           |
| 109 - 128 | 2203.2740 | 2202.2667 | 2202.1354 | 0.1313  | 0 | R.IGQPTLLLYVDAGPETMTQR.L |
| 149 - 155 | 972.4705  | 971.4632  | 971.5076  | -0.0444 | 1 | K.RLETYYK.A              |
| 156 - 166 | 1267.6103 | 1266.6030 | 1266.6496 | -0.0465 | 0 | K.ATEPVIAFYEK.R          |

No match to: 1232.5433, 1539.0805, 2158.2752

67) Spectrin beta chain, brain 1

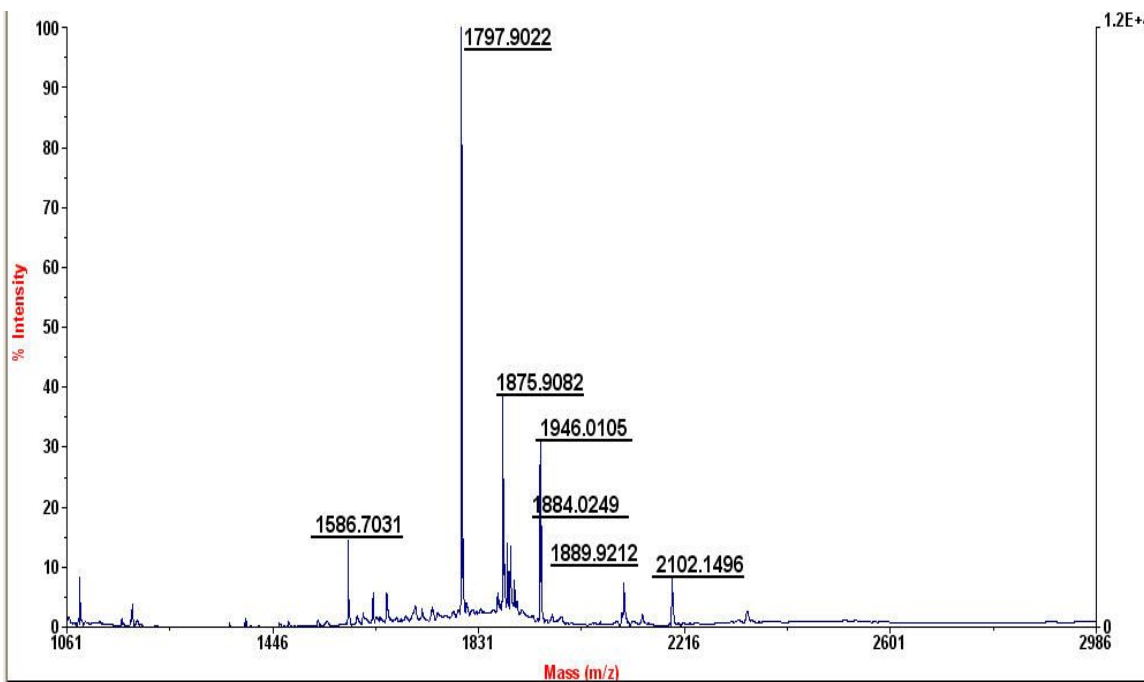

| Start - End   | Observed  | Mr(expt)  | Mr(calc)  | Delta   | Miss Sequence            |
|---------------|-----------|-----------|-----------|---------|--------------------------|
| 128 - 144     | 1946.0105 | 1945.0032 | 1944.8860 | 0.1172  | 0 R.VHLENMGSHDIVDGNHR.L  |
| Oxidation (M) |           |           |           |         |                          |
| 265 - 279     | 1884.0249 | 1883.0177 | 1882.9505 | 0.0672  | 0 K.SIITYVVITYYHYFSK.M   |
| 1355 - 1372   | 2102.1496 | 2101.1423 | 2101.0877 | 0.0546  | 1 K.LTGLHKMWEVLESTTQTK.A |
| 1395 - 1410   | 1875.9082 | 1874.9010 | 1874.8799 | 0.0211  | 0 K.WLHGLESQIQSDDYGK.D   |
| 1657 - 1672   | 1797.9022 | 1796.8950 | 1796.8839 | 0.0111  | 1 R.ALVADSHPESERISMR.Q   |
| 2044 - 2057   | 1586.7031 | 1585.6958 | 1585.8562 | -0.1604 | 1 R.EIGQSVDEVEKLIK.R     |
| 2073 - 2088   | 1889.9212 | 1888.9139 | 1889.0621 | -0.1483 | 1 R.FSALERLTTLLELLEVR.R  |

68) Phosphatidylethanolamine-binding protein 1

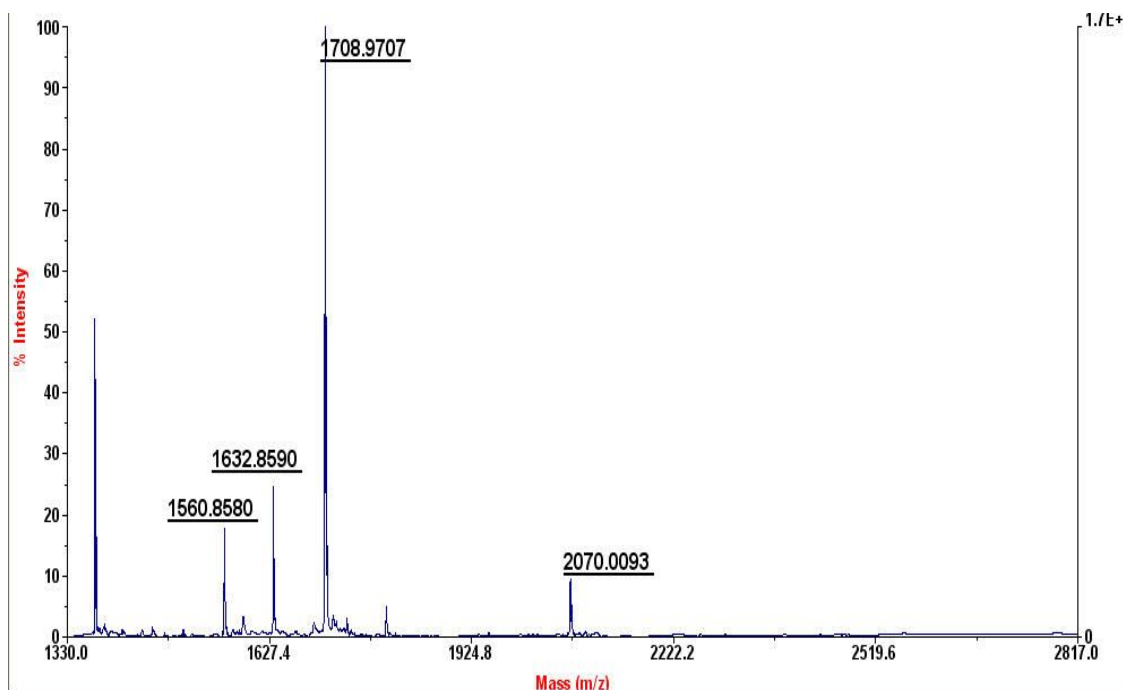

| Start - End | Observed  | Mr(expt)  | Mr(calc)  | Delta  | Miss Sequence            |
|-------------|-----------|-----------|-----------|--------|--------------------------|
| 48 - 62     | 1632.8590 | 1631.8517 | 1631.7903 | 0.0614 | 0 K.NRPTSISWDGLDSGK.L    |
| 63 - 76     | 1560.8580 | 1559.8507 | 1559.8195 | 0.0312 | 0 K.LYTLVLTDPDAPSR.K     |
| 120 - 132   | 1708.9707 | 1707.9634 | 1707.8984 | 0.0650 | 0 R.YVWLVEQDRPLK.C       |
| 162 - 179   | 2070.0093 | 2069.0021 | 2068.9200 | 0.0821 | 0 R.APVAGTCYQAEWDDYVPK.L |

No match to: 1370.7044, 3473.0676

69) Cofilin-1

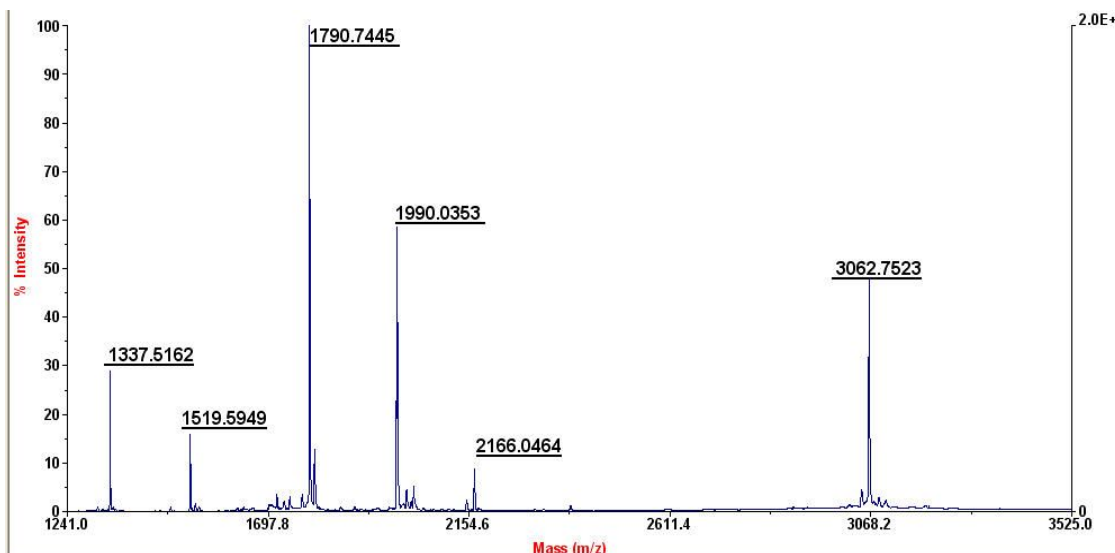

| Start - End | Observed | Mr(expt) | Mr(calc) | Delta | Miss Sequence |
|-------------|----------|----------|----------|-------|---------------|
|-------------|----------|----------|----------|-------|---------------|

|         |           |           |           |        |   |
|---------|-----------|-----------|-----------|--------|---|
| 46 - 73 | 3062.7523 | 3061.7450 | 3061.5858 | 0.1592 | 1 |
|---------|-----------|-----------|-----------|--------|---|

**K.NIILEEGKEILVGDVGQTVDDPYATFVK.M**

|           |           |           |           |         |   |                          |
|-----------|-----------|-----------|-----------|---------|---|--------------------------|
| 54 - 73   | 2166.0464 | 2165.0391 | 2165.0891 | -0.0501 | 0 | K.EILVGDVGQTVDDPYATFVK.M |
| 82 - 92   | 1337.5162 | 1336.5089 | 1336.6187 | -0.1098 | 0 | R.YALYDATYETK.E          |
| 96 - 112  | 1990.0353 | 1989.0281 | 1989.0611 | -0.0330 | 1 | K.KEDLVFIFWAPESAPLK.S    |
| 133 - 144 | 1519.5949 | 1518.5877 | 1518.6772 | -0.0896 | 0 | K.HELQANCYEEVK.D         |
| 133 - 146 | 1790.7445 | 1789.7373 | 1789.8053 | -0.0680 | 1 | K.HELQANCYEEVKDR.C       |

No match to: 1789.7752, 1802.7323

70) Ubiquitin

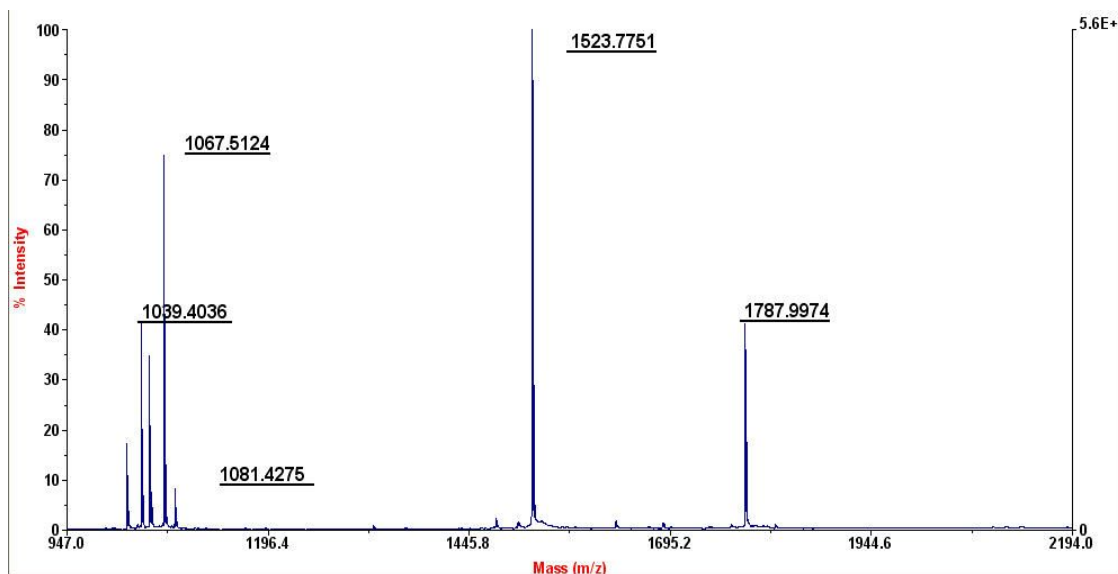

| Start - End | Observed | Mr(expt) | Mr(calc) | Delta | Miss Sequence |
|-------------|----------|----------|----------|-------|---------------|
|-------------|----------|----------|----------|-------|---------------|

|         |           |           |           |        |   |                      |
|---------|-----------|-----------|-----------|--------|---|----------------------|
| 12 - 27 | 1787.9974 | 1786.9901 | 1786.9200 | 0.0702 | 0 | K.TITLEVEPSDTIENVK.A |
|---------|-----------|-----------|-----------|--------|---|----------------------|

|         |           |           |           |         |   |                   |
|---------|-----------|-----------|-----------|---------|---|-------------------|
| 30 - 42 | 1523.7751 | 1522.7678 | 1522.7739 | -0.0061 | 1 | K.IQDKEGIPPDQQR.L |
| 34 - 42 | 1039.4036 | 1038.3963 | 1038.5094 | -0.1131 | 0 | K.EGIPPDQQR.L     |
| 55 - 63 | 1081.4275 | 1080.4202 | 1080.5451 | -0.1249 | 0 | R.TLSDYNIQK.E     |
| 64 - 72 | 1067.5124 | 1066.5051 | 1066.6135 | -0.1084 | 0 | K.ESTLHLVLR.L     |

No match to: 1021.3893, 1049.4933

71) Endoplasmin precursor

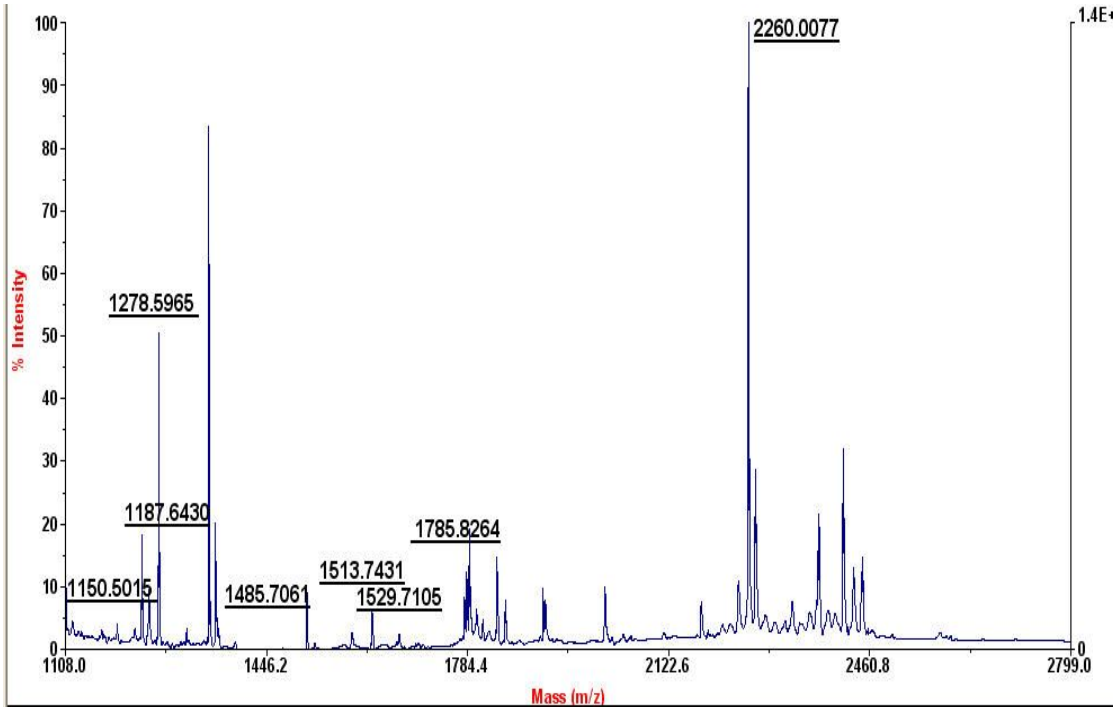

| Start - End | Observed  | Mr(expt)  | Mr(calc)  | Delta   | Miss Sequence                  |
|-------------|-----------|-----------|-----------|---------|--------------------------------|
| 52 - 67     | 1785.8264 | 1784.8191 | 1784.8904 | -0.0713 | 0 R.EEEAIQLDGLNASQIR.E         |
| 76 - 84     | 1081.5124 | 1080.5051 | 1080.5352 | -0.0301 | 0 K.FAFQAEVNR.M                |
| 143 - 156   | 1513.7431 | 1512.7359 | 1512.7718 | -0.0359 | 0 K.NLLHVTDGTGVMTR.E           |
| 143 - 156   | 1529.7105 | 1528.7032 | 1528.7667 | -0.0635 | 0 K.NLLHVTDGTGVMTR.E Oxidation |

(M)

|           |           |           |           |         |                          |
|-----------|-----------|-----------|-----------|---------|--------------------------|
| 385 - 395 | 1187.6430 | 1186.6358 | 1186.6710 | -0.0352 | 0 K.SILFVPTSAPR.G        |
| 396 - 404 | 1015.4297 | 1014.4225 | 1014.4658 | -0.0433 | 0 R.GLFDEYGSK.K          |
| 435 - 448 | 1485.7061 | 1484.6989 | 1484.7470 | -0.0482 | 0 K.GVVDSDDLPLNVS.R.E    |
| 494 - 503 | 1139.5575 | 1138.5502 | 1138.5730 | -0.0228 | 0 K.LGVIEDHSNR.T         |
| 512 - 530 | 2260.0077 | 2259.0004 | 2259.0556 | -0.0552 | 0 R.FQSSHPTDITSLDQYVER.M |
| 547 - 557 | 1278.5965 | 1277.5892 | 1277.6251 | -0.0359 | 1 R.KEAESSPFVER.L        |

548 - 557 1150.5015 1149.4943 1149.5302 -0.0359 0 K.EAESSPFVER.L

72) Heat shock protein HSP 90-alpha

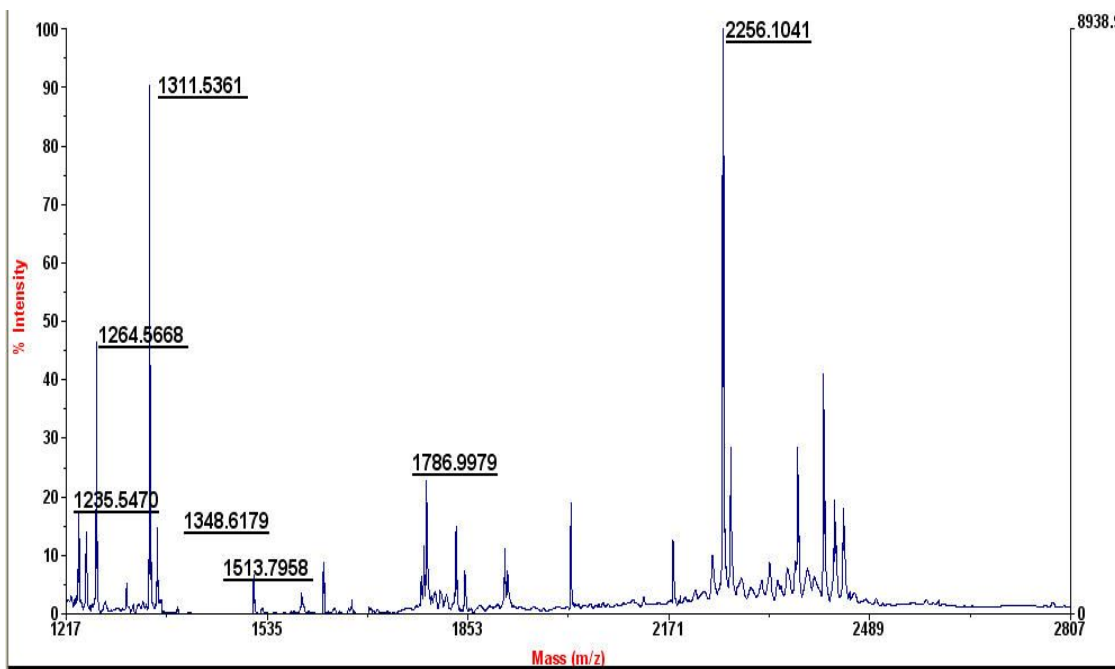

| Start - End | Observed  | Mr(expt)  | Mr(calc)  | Delta   | Miss Sequence                  |
|-------------|-----------|-----------|-----------|---------|--------------------------------|
| 154 - 173   | 2256.1041 | 2255.0968 | 2254.9515 | 0.1453  | 0 K.HNDDEQYAWESSAGGSFTVR.T     |
| 192 - 201   | 1311.5361 | 1310.5289 | 1310.5626 | -0.0338 | 0 K.EDQTEYLEER.R               |
| 346 - 355   | 1264.5668 | 1263.5595 | 1263.6360 | -0.0765 | 1 R.RAPFDLFENR.K               |
| 347 - 355   | 1108.4895 | 1107.4822 | 1107.5349 | -0.0527 | 0 R.APFDLFENR.K                |
| 387 - 400   | 1513.7958 | 1512.7885 | 1512.7783 | 0.0102  | 0 R.GVVDSEDLPLNISR.E           |
| 447 - 456   | 1168.4961 | 1167.4888 | 1167.5632 | -0.0744 | 0 K.LGIHEDSQNR.K               |
| 500 - 510   | 1235.5470 | 1234.5397 | 1234.5942 | -0.0544 | 0 K.DQVANSAPFVER.L             |
| 621 - 632   | 1348.6179 | 1347.6106 | 1347.5798 | 0.0308  | 1 R.DNSTMGYMAAKK.H 2 Oxidation |
| (M)         |           |           |           |         |                                |
| 633 - 647   | 1786.9979 | 1785.9907 | 1785.9373 | 0.0534  | 0 K.HLEINPDHSIETLR.Q           |

No match to: 1782.9945, 1911.0963, 2177.1023

73) Alpha-1B-glycoprotein precursor

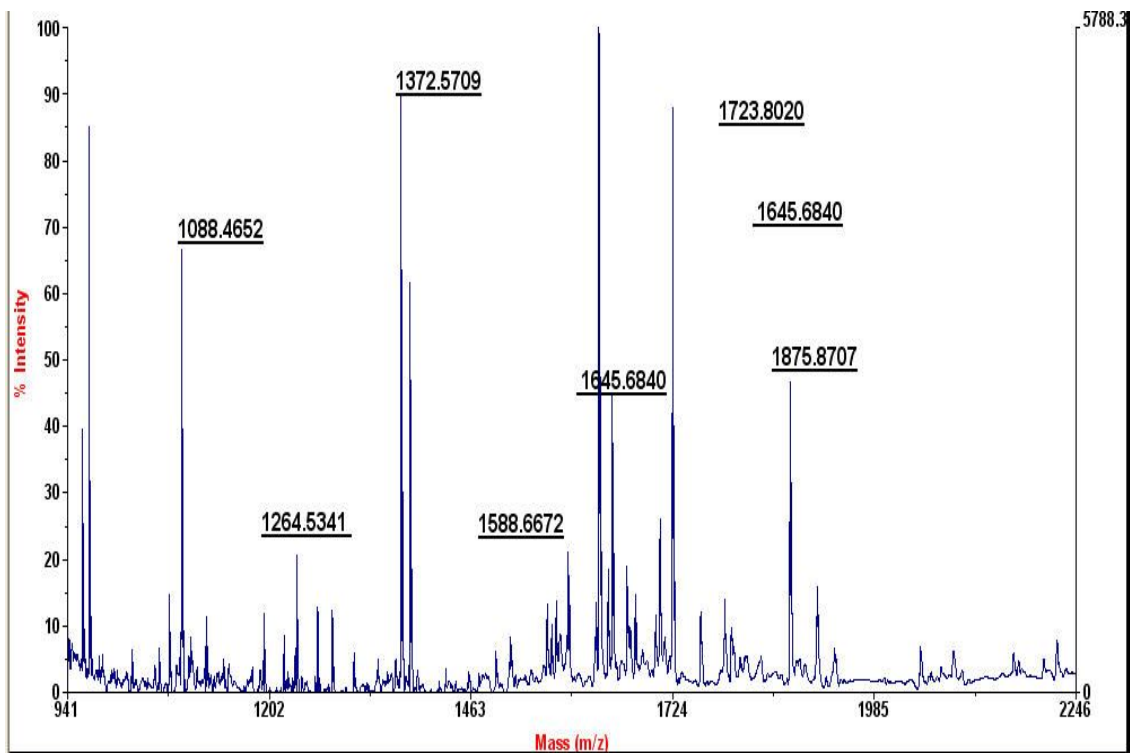

| Start - End | Observed  | Mr(expt)  | Mr(calc)  | Delta   | Miss Sequence           |
|-------------|-----------|-----------|-----------|---------|-------------------------|
| 79 - 90     | 1372.5709 | 1371.5636 | 1371.6895 | -0.1259 | 0 K.HQFLLTGDTQGR.Y      |
| 95 - 106    | 1264.5341 | 1263.5268 | 1263.6459 | -0.1191 | 0 R.SGLSTGWTQLSK.L      |
| 228 - 244   | 1875.8707 | 1874.8634 | 1874.9924 | -0.1289 | 0 K.VTLTCVAPLSGVDFQLR.R |
| 392 - 406   | 1723.8020 | 1722.7948 | 1722.9529 | -0.1581 | 0 R.LELHVDGPPRPQLR.A    |
| 407 - 417   | 1088.4652 | 1087.4579 | 1087.5774 | -0.1194 | 0 R.ATWSGAVLAGR.D       |
| 423 - 436   | 1588.6672 | 1587.6599 | 1587.7966 | -0.1367 | 0 R.CEGPIPDVTFELLR.E    |
| 423 - 436   | 1645.6840 | 1644.6767 | 1644.8181 | -0.1414 | 0 R.CEGPIPDVTFELLR.E    |

No match to: 1384.5600, 1628.6499, 1664.6698, 1707.5721

74) Plastin-2

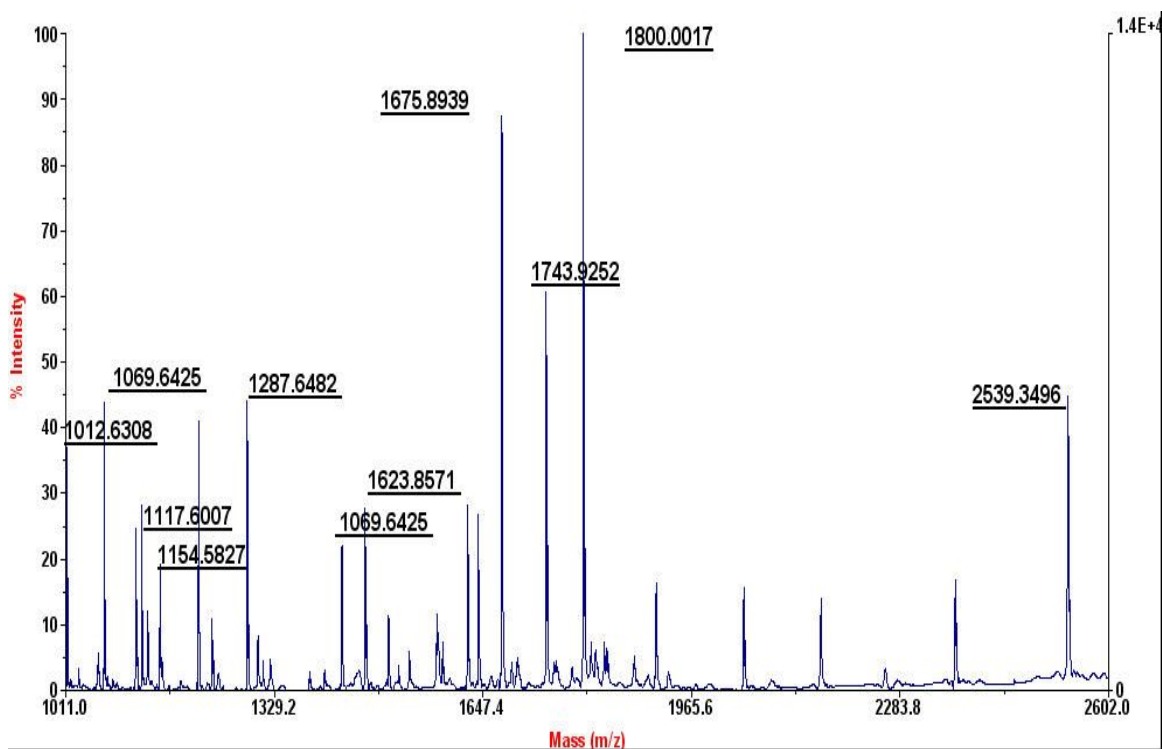

| Start - End | Observed  | Mr(expt)  | Mr(calc)  | Delta   | Miss Sequence                  |
|-------------|-----------|-----------|-----------|---------|--------------------------------|
| 40 - 49     | 1117.6007 | 1116.5935 | 1116.5750 | 0.0185  | 0 K.AACLPLPGYR.V               |
| 124 - 132   | 1154.5827 | 1153.5754 | 1153.5920 | -0.0166 | 0 K.YAFVNWINK.A                |
| 245 - 253   | 1012.6308 | 1011.6235 | 1011.6076 | 0.0159  | 0 R.NEALIALLR.E                |
| 264 - 272   | 1069.6425 | 1068.6353 | 1068.6179 | 0.0174  | 0 K.LSPEELLLR.W                |
| 298 - 309   | 1431.7436 | 1430.7363 | 1430.7558 | -0.0194 | 0 K.AYYHLLEQVAPK.G             |
| 310 - 326   | 1743.9252 | 1742.9179 | 1742.8508 | 0.0671  | 0 K.GDEEGVPAVVIDMSGLR.E        |
| 334 - 347   | 1623.8571 | 1622.8499 | 1622.7327 | 0.1172  | 1 R.AECMLQQAERLGCR.Q Oxidation |
| (M)         |           |           |           |         |                                |
| 374 - 395   | 2539.3496 | 2538.3423 | 2538.2139 | 0.1284  | 0 R.YPALHKPENQDIDWGALEGETR.E   |
| 402 - 412   | 1287.6482 | 1286.6409 | 1286.6189 | 0.0220  | 0 R.NWMNSLGVNPR.V              |
| 433 - 441   | 1126.6520 | 1125.6447 | 1125.6294 | 0.0152  | 1 K.IKVPVDWNR.V                |
| 473 - 488   | 1675.8939 | 1674.8866 | 1674.8325 | 0.0542  | 0 K.FSLVGIGGQDLNEG NR.T        |
| 516 - 530   | 1800.0017 | 1798.9945 | 1798.9213 | 0.0732  | 0 K.VNDDIIVNWVNETLR.E          |

No match to: 960.5659, 1213.6339, 1467.8611, 1639.9042

75) Aconitate hydratase

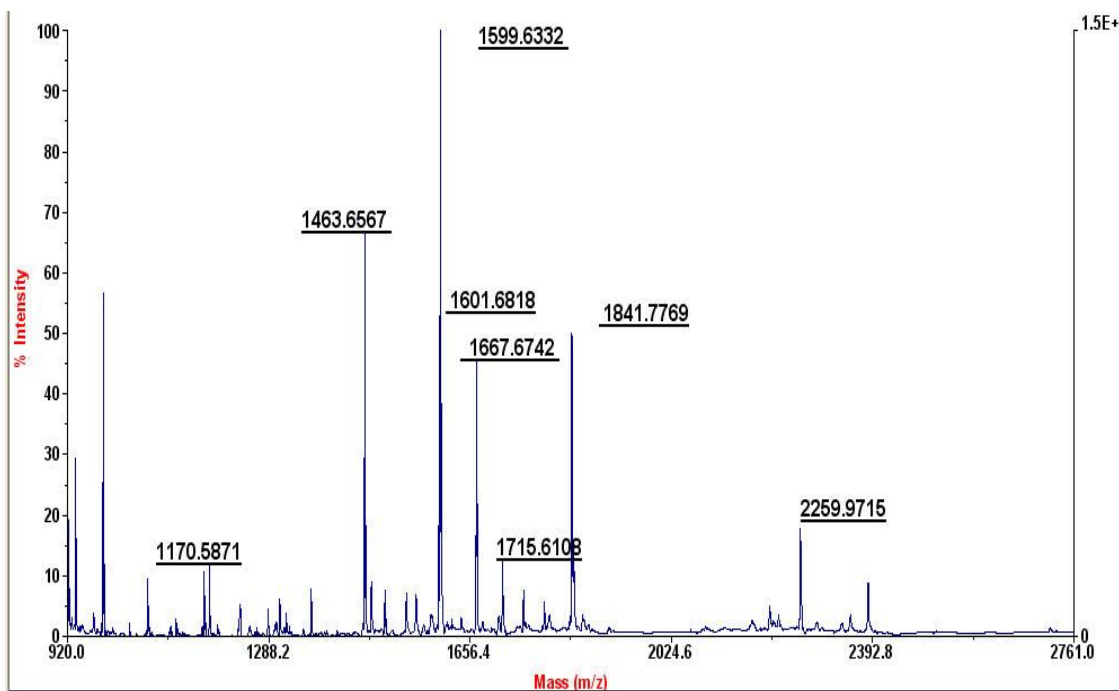

| Start - End | Observed  | Mr(expt)  | Mr(calc)  | Delta   | Miss Sequence               |
|-------------|-----------|-----------|-----------|---------|-----------------------------|
| 59 - 68     | 1170.5871 | 1169.5798 | 1169.6768 | -0.0970 | 0 R.LNRPLTLSEK.I            |
| 69 - 84     | 1841.7769 | 1840.7697 | 1840.8955 | -0.1258 | 0 K.IVYGHLDPPASQEIER.G      |
| 118 - 138   | 2259.9715 | 2258.9642 | 2259.1317 | -0.1675 | 0 K.VAVPSTIHCDHLIEAQVGGEK.D |
| 371 - 378   | 985.4262  | 984.4190  | 984.5029  | -0.0839 | 0 K.EGWPLDIR.V              |
| 412 - 424   | 1463.6567 | 1462.6494 | 1462.7416 | -0.0922 | 0 K.SQFTITPGSEQIR.A         |
| 430 - 437   | 935.4036  | 934.3963  | 934.4872  | -0.0909 | 0 R.DGYAQILR.D              |
| 522 - 534   | 1500.6336 | 1499.6264 | 1499.7620 | -0.1356 | 1 K.FRLEAPDADELPK.G         |
| 535 - 549   | 1715.6108 | 1714.6035 | 1714.7587 | -0.1551 | 0 K.GEFDPGQDTYQHPPK.D       |
| 550 - 564   | 1599.6332 | 1598.6260 | 1598.7285 | -0.1025 | 0 K.DSSGQHVDVSPTSQR.L       |
| 634 - 648   | 1601.6818 | 1600.6745 | 1600.7845 | -0.1100 | 0 R.NAVTQEFGPVPDAR.Y        |
| 657 - 671   | 1667.6742 | 1666.6670 | 1666.7586 | -0.0917 | 0 R.WVIGDENYGEGR.E          |
| 672 - 679   | 922.3976  | 921.3903  | 921.4668  | -0.0764 | 0 R.EHAALPR.H               |

76) Alpha-enolase



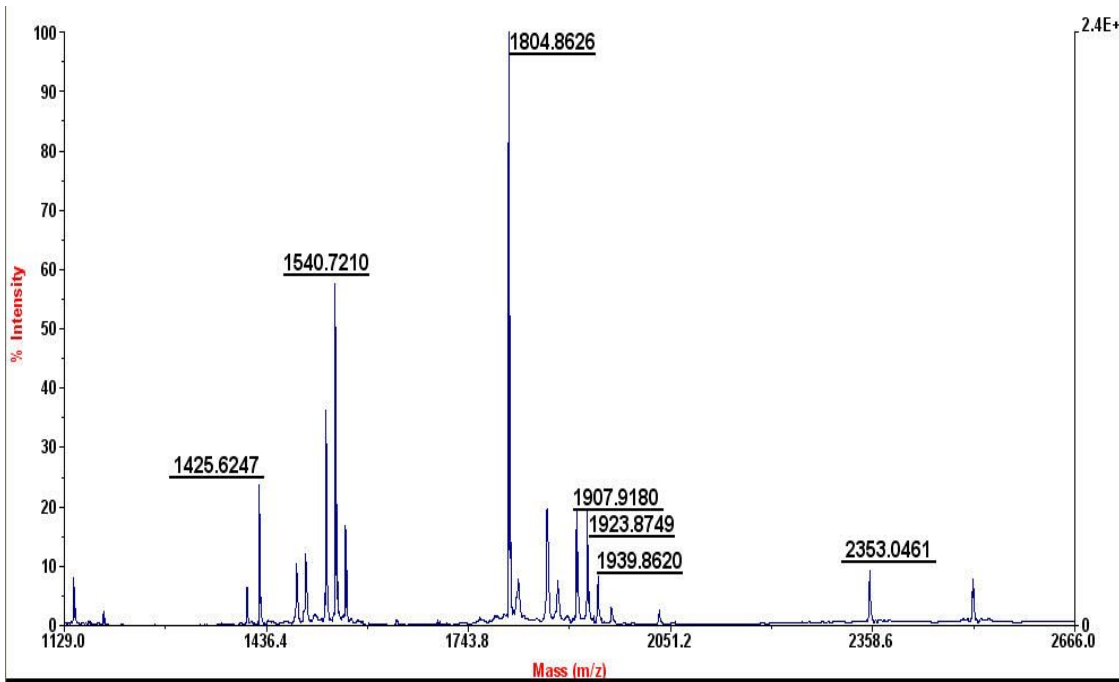

| Start - End   | Observed  | Mr(expt)  | Mr(calc)  | Delta   | Miss Sequence                      |
|---------------|-----------|-----------|-----------|---------|------------------------------------|
| 33 - 50       | 1804.8626 | 1803.8553 | 1803.9366 | -0.0813 | 0 R.AAVPSGASTGIYEALRLR.D           |
| 163 - 179     | 1907.9180 | 1906.9107 | 1906.9797 | -0.0689 | 0 K.LAMQEFMILPVGAANFR.E            |
| 163 - 179     | 1923.8749 | 1922.8676 | 1922.9746 | -0.1070 | 0 K.LAMQEFMILPVGAANFR.E            |
| Oxidation (M) |           |           |           |         |                                    |
| 163 - 179     | 1939.8620 | 1938.8548 | 1938.9695 | -0.1147 | 0 K.LAMQEFMILPVGAANFR.E 2          |
| Oxidation (M) |           |           |           |         |                                    |
| 240 - 253     | 1540.7210 | 1539.7138 | 1539.7755 | -0.0617 | 0 K.VVIGMDVAASEFFR.S               |
| 240 - 253     | 1556.6522 | 1555.6449 | 1555.7704 | -0.1254 | 0 K.VVIGMDVAASEFFR.S Oxidation (M) |
| 270 - 281     | 1425.6247 | 1424.6174 | 1424.7187 | -0.1013 | 0 R.YISPDQLADLYK.S                 |
| 373 - 394     | 2353.0461 | 2352.0388 | 2352.1518 | -0.1130 | 0 R.SGETEDTFIADLVVGLCTGQIK.T       |

No match to: 1526.6699

77) Isocitrate dehydrogenase

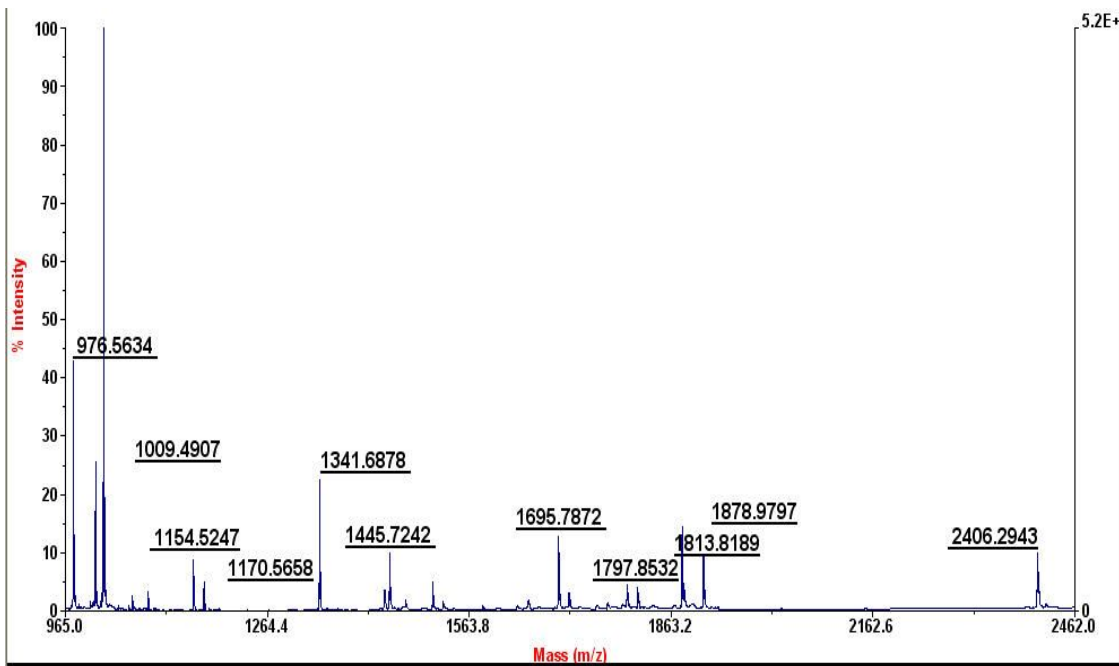

| Start - End | Observed  | Mr(expt)  | Mr(calc)  | Delta   | Miss Sequence                      |
|-------------|-----------|-----------|-----------|---------|------------------------------------|
| 5 - 20      | 1695.7872 | 1694.7799 | 1694.7603 | 0.0196  | 0 K.ISGGSVVEMQGD <del>M</del> TR.I |
| 30 - 49     | 2406.2943 | 2405.2870 | 2405.2266 | 0.0604  | 0 K.LIFPYVELDLHSYDLGIENR.D         |
| 101 - 109   | 976.5634  | 975.5561  | 975.5501  | 0.0060  | 0 R.NILGGTVFR.E                    |
| 133 - 140   | 1009.4907 | 1008.4834 | 1008.4413 | 0.0421  | 0 R.HAYGDQYR.A                     |
| 188 - 203   | 1797.8532 | 1796.8460 | 1796.8403 | 0.0057  | 0 K.SIEDFAHSSFQMALSK.G             |
| 188 - 203   | 1813.8189 | 1812.8117 | 1812.8352 | -0.0235 | 0 K.SIEDFAHSSFQMALSK.G Oxidation   |
| (M)         |           |           |           |         |                                    |
| 223 - 233   | 1445.7242 | 1444.7169 | 1444.7238 | -0.0069 | 1 R.FKDIFQEYDK.Q                   |
| 225 - 233   | 1170.5658 | 1169.5586 | 1169.5604 | -0.0019 | 0 K.DIFQEYDK.Q                     |
| 261 - 270   | 1154.5247 | 1153.5174 | 1153.5226 | -0.0051 | 0 K.SEGGFIWACK.N                   |
| 302 - 314   | 1341.6878 | 1340.6805 | 1340.6684 | 0.0121  | 0 K.TVEAEAAHGTVTR.H                |
| 322 - 338   | 1878.9797 | 1877.9724 | 1877.9271 | 0.0452  | 0 K.GQETSTNPIASIFAWTR.G            |
| 389 - 400   | 1509.6656 | 1508.6583 | 1508.6493 | 0.0090  | 0 R.SDYLN <del>T</del> FEFMDK.L    |

No match to: 1021.4793, 1910.9660

78) Tigger transposable element-derived protein 2

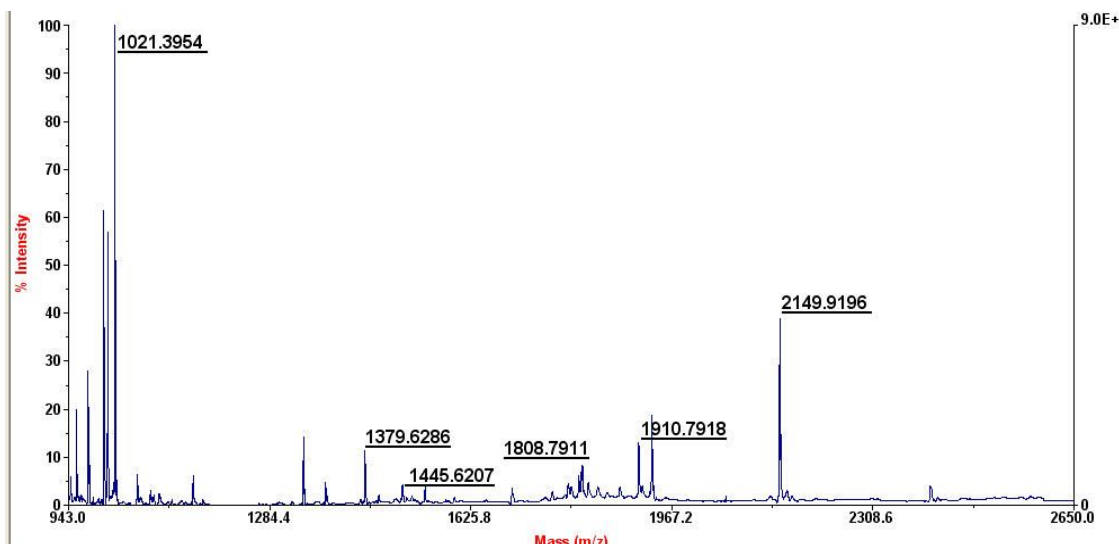

| Start - End | Observed  | Mr(expt)  | Mr(calc)  | Delta   | Miss Sequence             |
|-------------|-----------|-----------|-----------|---------|---------------------------|
| 31 - 43     | 1379.6286 | 1378.6214 | 1378.7456 | -0.1242 | 0 K.LSVVYGIGESTVR.D       |
| 52 - 68     | 1808.7911 | 1807.7838 | 1807.9064 | -0.1226 | 1 R.IINYANSSDPTSGVSKR.K   |
| 70 - 81     | 1445.6207 | 1444.6134 | 1444.6504 | -0.0369 | 1 K.SMKSSTYEELDR.V        |
| 147 - 165   | 2149.9196 | 2148.9123 | 2148.9421 | -0.0298 | 1 K.GDETAAREFCGSFQEFVEK.E |
| 254 - 268   | 1910.7918 | 1909.7845 | 1909.9474 | -0.1629 | 1 K.GAWIEQSVFRQWFEK.Y     |
| 378 - 386   | 1021.3954 | 1020.3881 | 1020.5604 | -0.1722 | 1 K.SSTITKAWK.K           |

No match to: 1002.4287, 1009.4070, 1341.5977, 1932.8442

### 79) Phosphoglycerate mutase 1

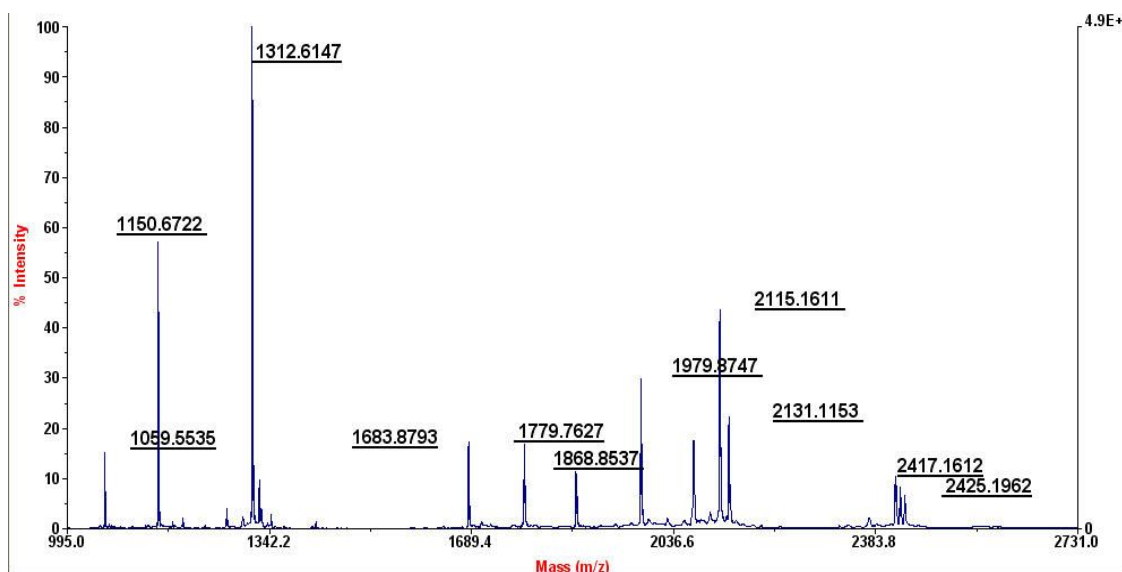

| Start - End | Observed | Mr(expt) | Mr(calc) | Delta | Miss Sequence |
|-------------|----------|----------|----------|-------|---------------|
|-------------|----------|----------|----------|-------|---------------|

|           |           |           |           |         |   |                           |
|-----------|-----------|-----------|-----------|---------|---|---------------------------|
| 11 - 21   | 1312.6147 | 1311.6074 | 1311.5956 | 0.0119  | 0 | R.HGESAWNLENR.F           |
| 22 - 39   | 1979.8747 | 1978.8675 | 1978.8697 | -0.0022 | 0 | R.FSGWYDADLSPAGHEEAK.R    |
| 47 - 61   | 1779.7627 | 1778.7554 | 1778.7821 | -0.0267 | 0 | R.DAGYEFDICFTSVQK.R       |
| 91 - 100  | 1059.5535 | 1058.5462 | 1058.5508 | -0.0046 | 0 | R.HYGGLTGLNK.A            |
| 118 - 138 | 2417.1612 | 2416.1539 | 2416.1045 | 0.0494  | 0 | R.SYDVPPPPMEPDHPFYSNISK.D |
| 142 - 157 | 1868.8537 | 1867.8464 | 1867.8509 | -0.0045 | 0 | R.YADLTEDQLPSCESLK.D      |
| 142 - 162 | 2425.1962 | 2424.1889 | 2424.1478 | 0.0411  | 1 | R.YADLTEDQLPSCESLKDTIAR.A |
| 163 - 176 | 1683.8793 | 1682.8720 | 1682.9031 | -0.0312 | 0 | R.ALPFWNEEIVPQIK.E        |
| 181 - 191 | 1150.6722 | 1149.6649 | 1149.6618 | 0.0032  | 0 | R.VLIAAHGNSLR.G           |
| 223 - 240 | 2115.1611 | 2114.1538 | 2114.1193 | 0.0345  | 0 | K.NLKPIKPMQFLGDEETVR.K    |
| 223 - 240 | 2131.1153 | 2130.1080 | 2130.1143 | -0.0062 | 0 | K.NLKPIKPMQFLGDEETVR.K    |

Oxidation (M)

No match to: 2070.2442

80) Probable isomerase MAWBP

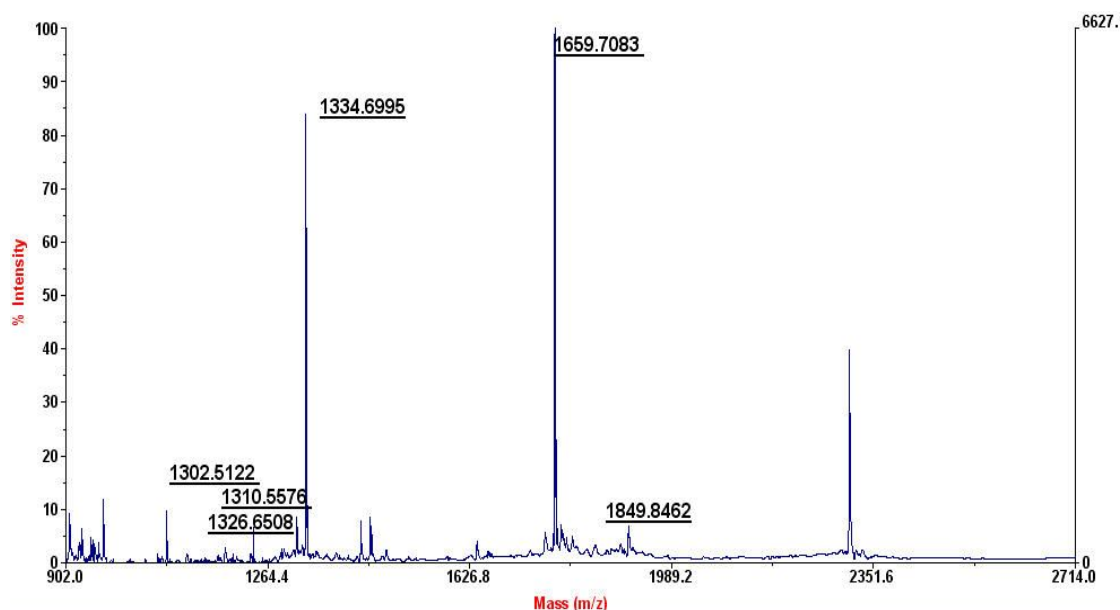

| Start - End | Observed  | Mr(expt)  | Mr(calc)  | Delta   | Miss Sequence                   |
|-------------|-----------|-----------|-----------|---------|---------------------------------|
| 3 - 14      | 1334.6995 | 1333.6922 | 1333.7394 | -0.0471 | 0 K.LPIFIADAFTAR.A              |
| 41 - 51     | 1310.5576 | 1309.5503 | 1309.6336 | -0.0833 | 0 R.EMNLSETAFIR.K               |
| 41 - 51     | 1326.6508 | 1325.6435 | 1325.6285 | 0.0150  | 0 R.EMNLSETAFIR.K Oxidation (M) |
| 53 - 68     | 1849.8462 | 1848.8389 | 1848.8577 | -0.0188 | 0 K.LHPTDNFAQSSCFGLR.W          |

|           |           |           |           |         |   |                     |
|-----------|-----------|-----------|-----------|---------|---|---------------------|
| 202 - 216 | 1659.7083 | 1658.7010 | 1658.7324 | -0.0314 | 0 | K.GEPGGQTQAFDFYSR.Y |
| 249 - 258 | 1302.5122 | 1301.5049 | 1301.5393 | -0.0345 | 0 | K.EMHAFQCSHR.G      |

No match to: 1284.4988, 1292.6261, 1332.6794, 1778.7753

81) XTP3-transactivated gene B protein

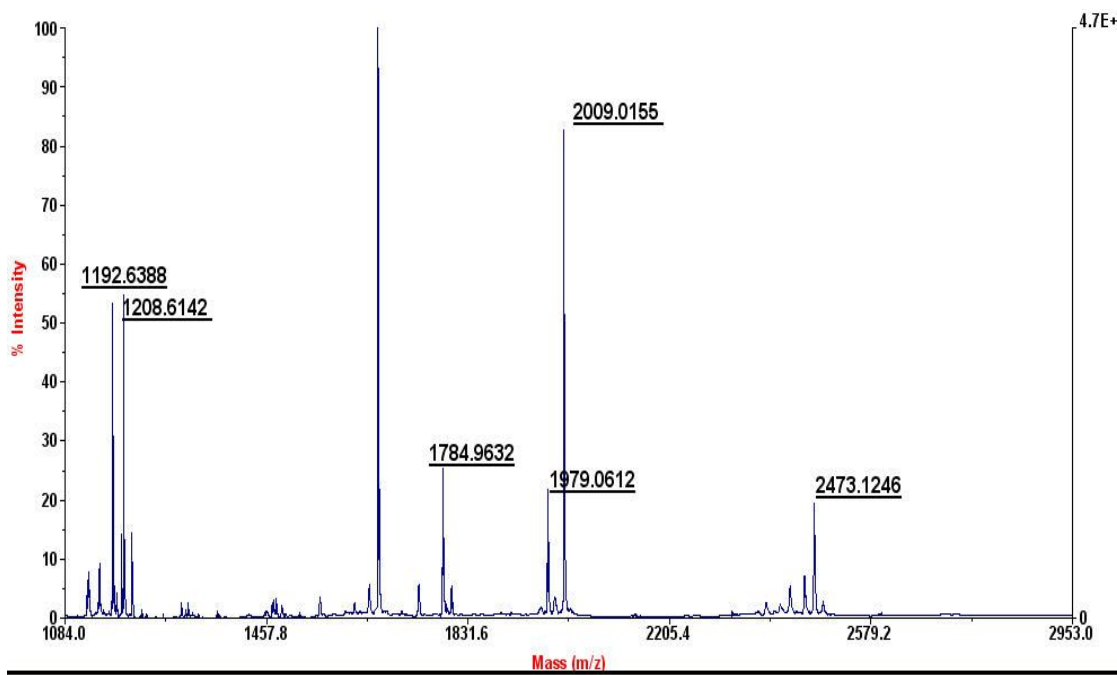

| Start - End | Observed  | Mr(expt)  | Mr(calc)  | Delta   | Miss Sequence                  |
|-------------|-----------|-----------|-----------|---------|--------------------------------|
| 45 - 62     | 2009.0155 | 2008.0082 | 2008.0305 | -0.0223 | 0 R.VNWPGEFSLPTTGVLKY.E        |
| 180 - 202   | 2473.1246 | 2472.1173 | 2472.1123 | 0.0051  | 0 K.NIEGQMTPLYYPVGMGNGTPCSLK.Q |

Oxidation (M)

|           |           |           |           |         |                         |
|-----------|-----------|-----------|-----------|---------|-------------------------|
| 276 - 289 | 1784.9632 | 1783.9559 | 1783.9580 | -0.0021 | 1 R.QLEQQEEILRVFPR.R    |
| 337 - 346 | 1208.6142 | 1207.6069 | 1207.5331 | 0.0738  | 0 K.EFLSGSYCFR.G        |
| 337 - 353 | 1979.0612 | 1978.0540 | 1977.9195 | 0.1345  | 1 K.EFLSGSYCFRGGVGWVK.Y |
| 361 - 369 | 1192.6388 | 1191.6315 | 1191.5421 | 0.0894  | 0 K.HVHQYHEDK.D         |

No match to: 1022.5853, 1172.5006, 1188.4765, 1664.8513

82) Carbonic anhydrase 3

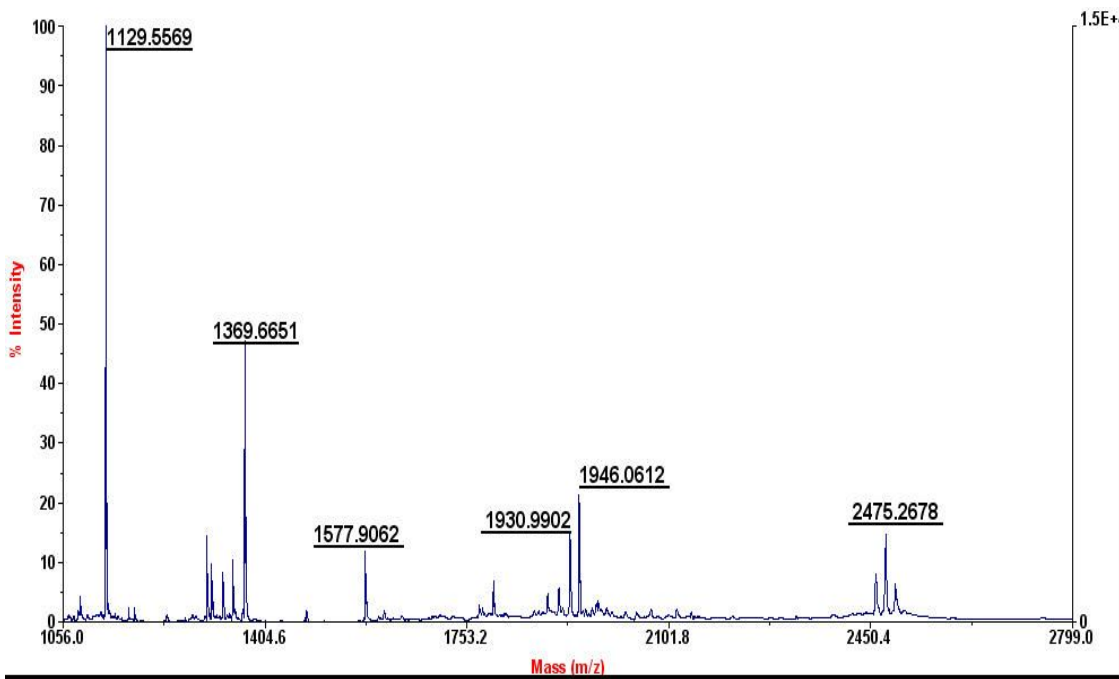

| Start - End | Observed  | Mr(expt)  | Mr(calc)  | Delta  | Miss Sequence                |
|-------------|-----------|-----------|-----------|--------|------------------------------|
| 40 - 57     | 1930.9902 | 1929.9829 | 1929.8857 | 0.0972 | 0 R.HDPSLQPWSVSYDGGSAK.T     |
| 68 - 76     | 1129.5569 | 1128.5496 | 1128.5087 | 0.0409 | 0 R.VVFDDTYDR.S              |
| 81 - 89     | 913.5213  | 912.5140  | 912.4817  | 0.0323 | 0 R.GGPLPGPYR.L              |
| 92 - 113    | 2475.2678 | 2474.2606 | 2474.0999 | 0.1607 | 0 R.QFHLHWGSSDDHGSEHTVDGVK.Y |
| 114 - 126   | 1577.9062 | 1576.8989 | 1576.8150 | 0.0839 | 0 K.YAAELHLVHWNPK.Y          |
| 149 - 165   | 1946.0612 | 1945.0539 | 1944.9581 | 0.0959 | 0 K.IGHENGEFQIFLDALDK.I      |
| 178 - 188   | 1369.6651 | 1368.6578 | 1368.5955 | 0.0624 | 0 K.FDPSCLFPACR.D 2          |

No match to: 1304.7676, 1348.7194

83) Triosephosphate isomerase

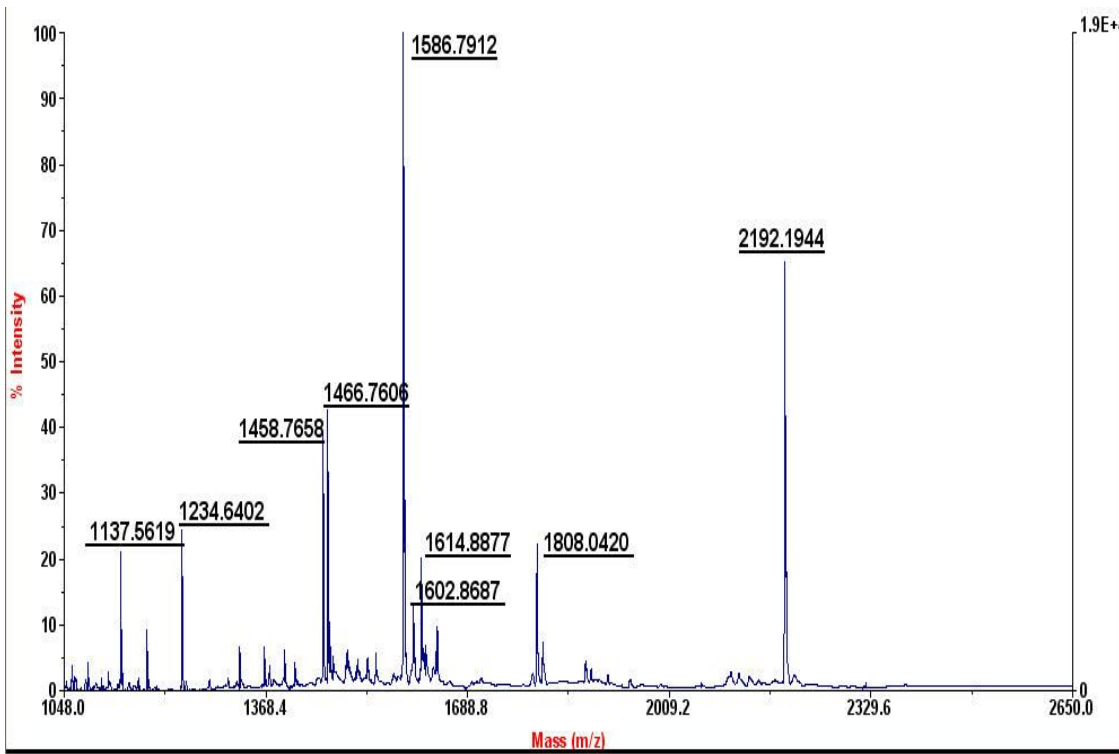

| Start - End | Observed  | Mr(expt)  | Mr(calc)  | Delta   | Miss Sequence              |
|-------------|-----------|-----------|-----------|---------|----------------------------|
| 34 - 53     | 2192.1944 | 2191.1871 | 2191.0619 | 0.1252  | 0 K.VPADTEVVCAPPTAYIDFAR.Q |
| 60 - 69     | 1137.5619 | 1136.5547 | 1136.5648 | -0.0101 | 0 K.IAVAAQNCYK.V           |
| 86 - 99     | 1586.7912 | 1585.7839 | 1585.7307 | 0.0532  | 0 K.DCGATWVVLGHSER.R       |
| 100 - 113   | 1614.8877 | 1613.8804 | 1613.8161 | 0.0643  | 1 R.RHVFGESDELIGQK.V       |
| 101 - 113   | 1458.7658 | 1457.7586 | 1457.7150 | 0.0436  | 0 R.HVFGESDELIGQK.V        |
| 114 - 131   | 1808.0420 | 1807.0347 | 1806.9661 | 0.0686  | 0 K.VAHALAEGLGVIACIGEK.L   |
| 161 - 175   | 1602.8687 | 1601.8614 | 1601.8817 | -0.0202 | 0 K.VVLAYEPVWAIGTGK.T      |
| 176 - 188   | 1466.7606 | 1465.7534 | 1465.7161 | 0.0373  | 0 K.TATPQQAQEVHEK.L        |
| 195 - 206   | 1234.6402 | 1233.6329 | 1233.5949 | 0.0380  | 0 K.SNVSDAVAQSTR.I         |

No match to: 1179.6307, 1365.6903, 1797.9882

84) Peroxiredoxin-6

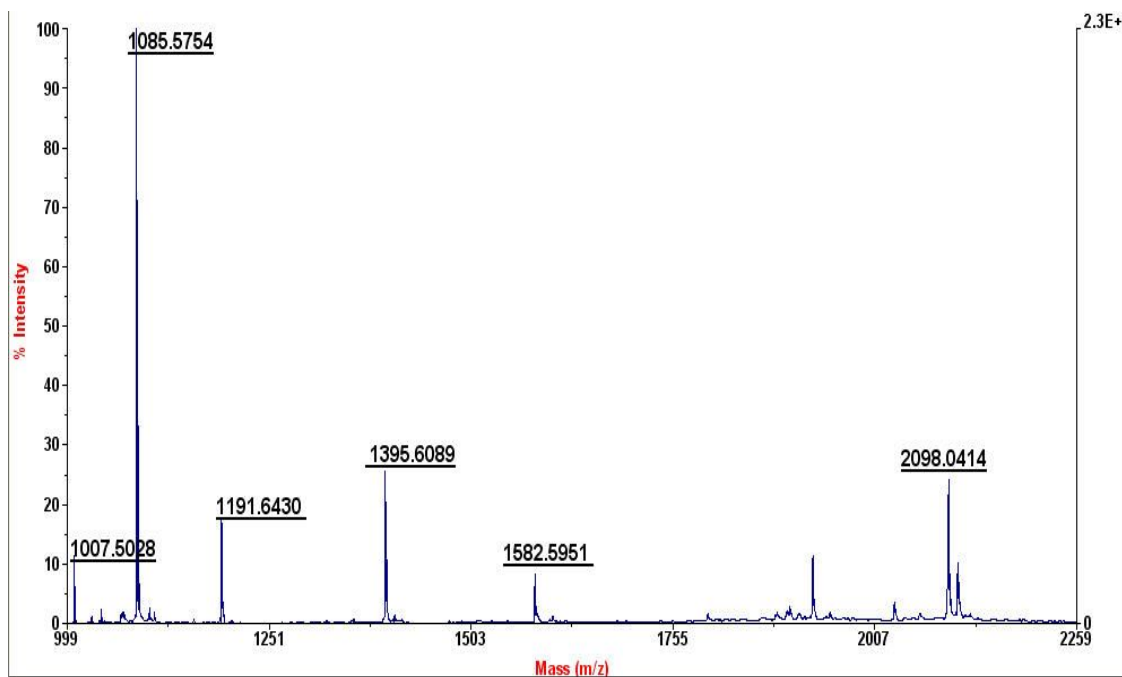

| Start - End | Observed  | Mr(expt)  | Mr(calc)  | Delta   | Miss Sequence               |
|-------------|-----------|-----------|-----------|---------|-----------------------------|
| 2 - 22      | 2098.0414 | 2097.0341 | 2097.0854 | -0.0512 | 0 M.PGLLLLGDVAPNFEANTTVGR.I |
| 42 - 53     | 1395.6089 | 1394.6016 | 1394.6500 | -0.0484 | 0 R.DFTPVCTTELGR.A          |
| 85 - 97     | 1582.5951 | 1581.5878 | 1581.6617 | -0.0739 | 0 K.DINAYNCEEPTEK.L         |
| 98 - 106    | 1085.5754 | 1084.5681 | 1084.5917 | -0.0236 | 0 K.LPFPIIDDR.N             |
| 133 - 141   | 1007.5028 | 1006.4955 | 1006.5487 | -0.0532 | 0 R.VVVFVFGPDK.K            |
| 145 - 155   | 1191.6430 | 1190.6357 | 1190.6659 | -0.0302 | 0 K.LSILYPATTGR.N           |
| 156 - 162   | 906.4486  | 905.4413  | 905.4606  | -0.0193 | 0 R.NFDEILR.V               |

No match to: 1928.9092, 2110.0370

85) 5'(3')-deoxyribonucleotidase, cytosolic type



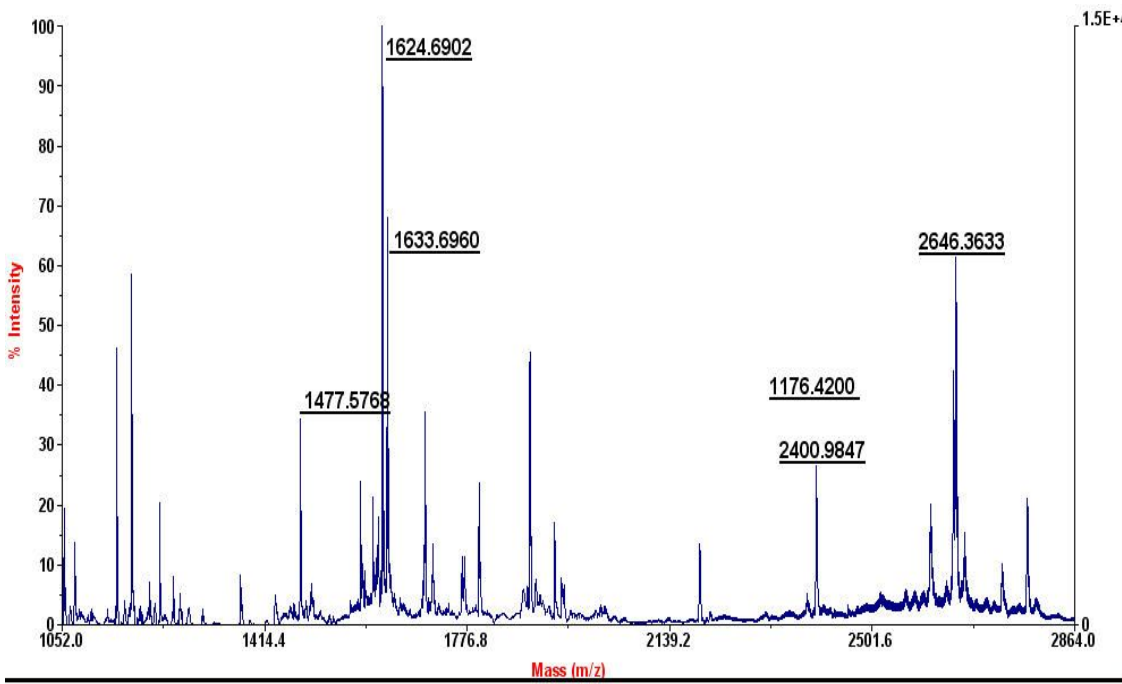

| Start - End | Observed  | Mr(expt)  | Mr(calc)  | Delta   | Miss Sequence                   |
|-------------|-----------|-----------|-----------|---------|---------------------------------|
| 30 - 41     | 1477.5768 | 1476.5696 | 1476.7361 | -0.1665 | 0 R.FPEEPHVPLEQR.R              |
| 30 - 42     | 1633.6960 | 1632.6887 | 1632.8372 | -0.1485 | 1 R.FPEEPHVPLEQRR.G             |
| 61 - 85     | 2646.3633 | 2645.3560 | 2645.3740 | -0.0179 | 0 K.VASVYEAPGFFLDLEPIPGALDAVR.E |
| 115 - 127   | 1624.6902 | 1623.6830 | 1623.8157 | -0.1327 | 0 R.WVEQHLGPQFVER.I             |
| 151 - 169   | 2400.9847 | 2399.9774 | 2400.0375 | -0.0601 | 0 R.GQEETPSWEHILFTCCHNR.H 2     |
| 170 - 177   | 932.3828  | 931.3755  | 931.5603  | -0.1848 | 0 R.HLVLPPTR.R                  |
| 180 - 188   | 1176.4200 | 1175.4127 | 1175.5723 | -0.1596 | 0 R.LLSWSDNWR.E                 |

No match to: 1148.4339, 1226.4280, 1586.5995, 1797.7778, 1888.9567, 2795.6382

86) Serum amyloid P-component precursor

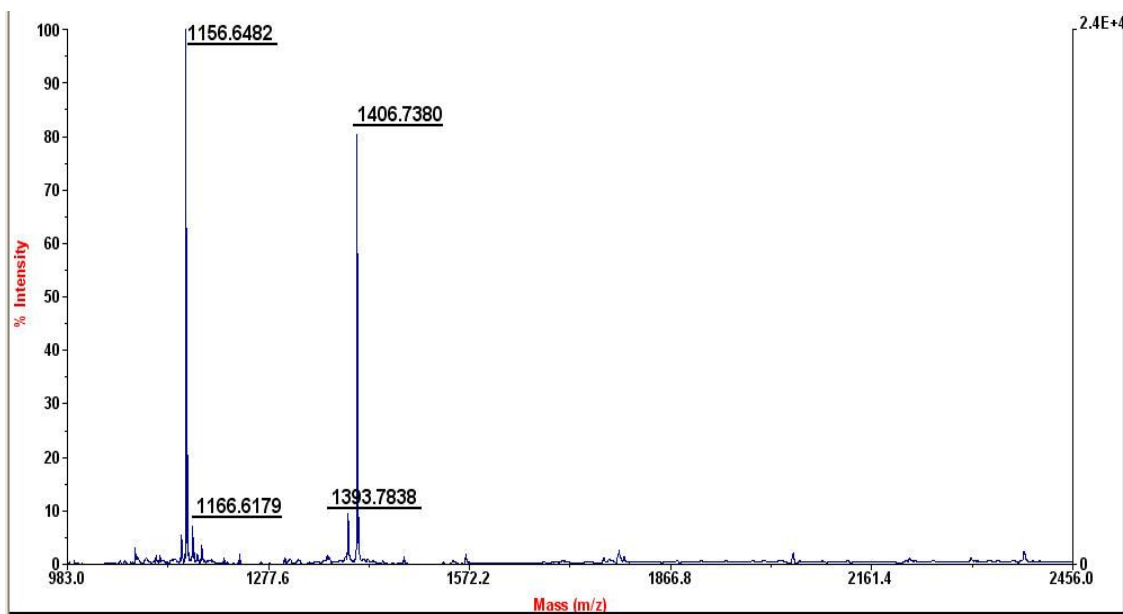

| Start - End | Observed  | Mr(expt)  | Mr(calc)  | Delta  | Miss Sequence       |
|-------------|-----------|-----------|-----------|--------|---------------------|
| 65 - 76     | 1406.7380 | 1405.7308 | 1405.6626 | 0.0682 | 0 R.AYSLFSYNTQGR.D  |
| 87 - 96     | 1156.6482 | 1155.6409 | 1155.5924 | 0.0485 | 0 R.VGEYSLYIGR.H    |
| 140 - 149   | 1166.6179 | 1165.6106 | 1165.5767 | 0.0339 | 0 R.QGYFVEAQP.K     |
| 150 - 162   | 1393.7838 | 1392.7765 | 1392.6884 | 0.0881 | 0 K.IVLGQEQDSYGGK.F |

87) Kelch-like protein 15

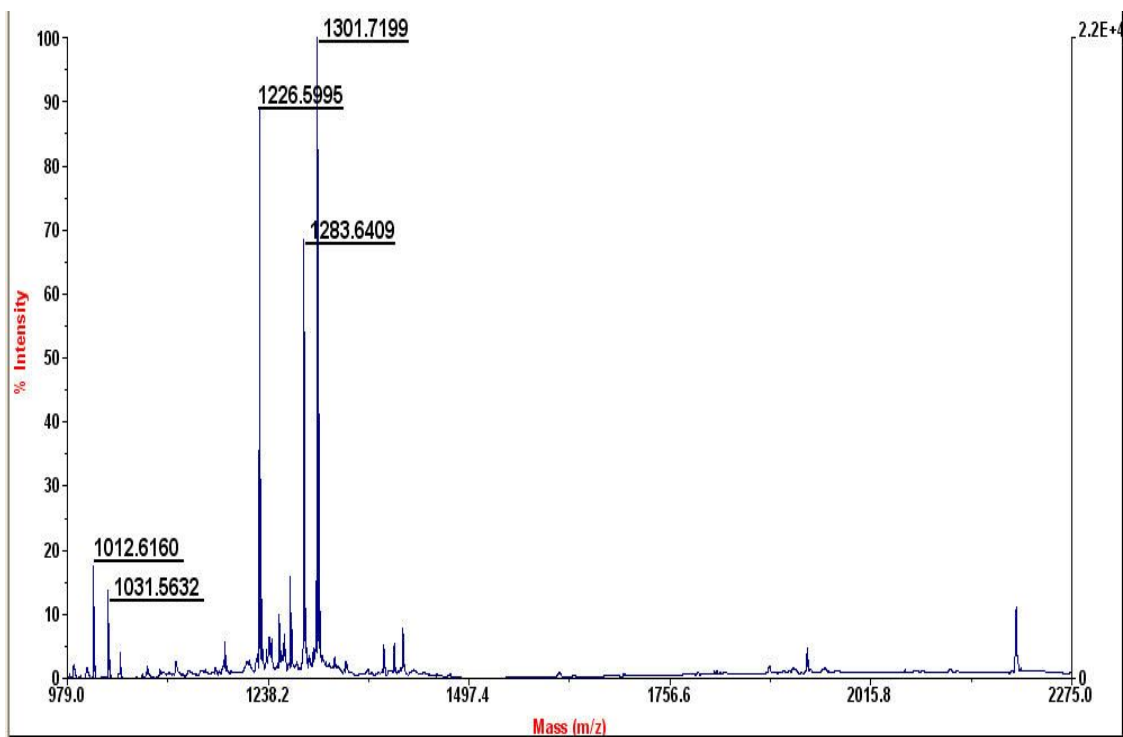

| Start - End | Observed  | Mr(expt)  | Mr(calc)  | Delta  | Miss Sequence                     |
|-------------|-----------|-----------|-----------|--------|-----------------------------------|
| 58 - 67     | 1301.7199 | 1300.7126 | 1300.5904 | 0.1222 | 1 R.IMFTADMRRER.D 2 Oxidation (M) |
| 119 - 127   | 1031.5632 | 1030.5559 | 1030.4980 | 0.0579 | 0 K.FCCSFLLA.K                    |
| 474 - 482   | 1226.5995 | 1225.5922 | 1225.5484 | 0.0438 | 1 K.MNYARCFHK.M                   |
| 533 - 542   | 1012.6160 | 1011.6087 | 1011.5349 | 0.0739 | 0 R.SGHGVTVLDK.Q                  |
| 572 - 581   | 1283.6409 | 1282.6336 | 1282.5322 | 0.1014 | 1 K.EDEYPRMPCK.L Oxidation (M)    |

No match to: 909.0651

88) Rho GDP-dissociation inhibitor 1

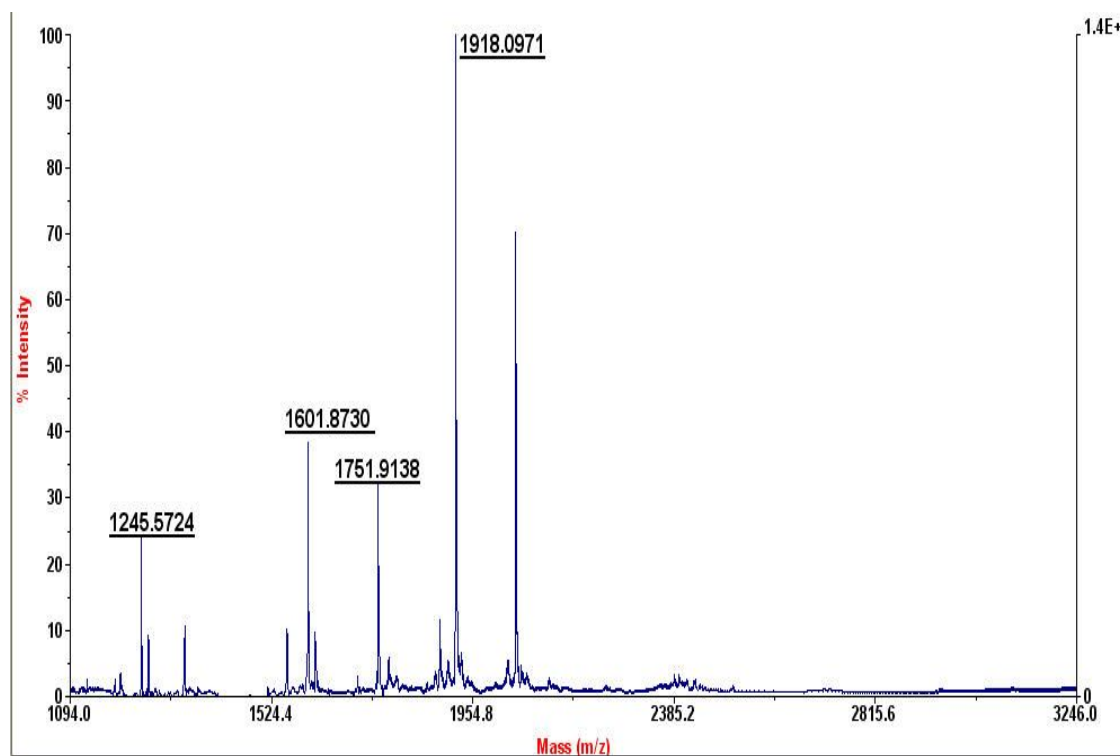

| Start - End | Observed  | Mr(expt)  | Mr(calc)  | Delta   | Miss Sequence         |
|-------------|-----------|-----------|-----------|---------|-----------------------|
| 34 - 49     | 1918.0971 | 1917.0898 | 1916.9327 | 0.1572  | 1 K.SIQEIQLDKDDESLR.K |
| 128 - 134   | 980.4574  | 979.4501  | 979.4875  | -0.0375 | 0 K.YIQHTYR.K         |
| 139 - 152   | 1601.8730 | 1600.8657 | 1600.7555 | 0.1102  | 1 K.IDKTDYMVGSYGPR.A  |
| 142 - 152   | 1245.5724 | 1244.5652 | 1244.5495 | 0.0156  | 0 K.TDYMVGSYGPR.A     |
| 153 - 167   | 1751.9138 | 1750.9065 | 1750.8301 | 0.0765  | 0 R.AEEYEFLTPVEEAPK.G |

No match to: 2046.1784

89) Peroxiredoxin-2

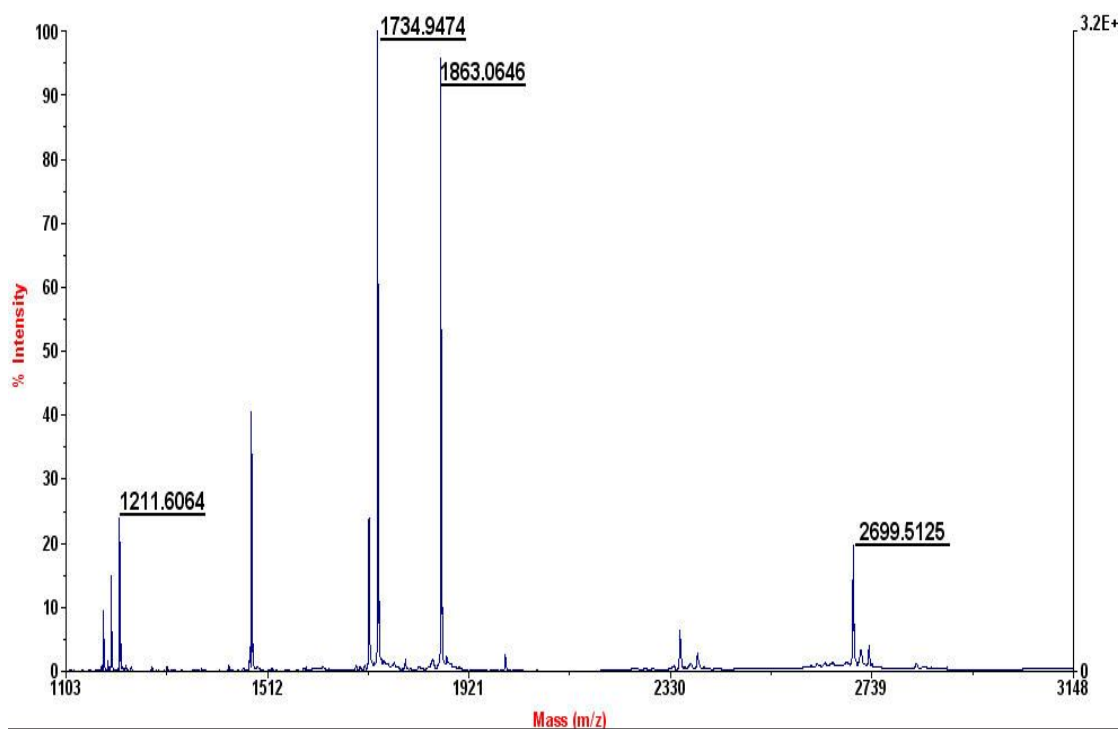

| Start - End                          | Observed  | Mr(expt)  | Mr(calc)  | Delta   | Miss Sequence            |
|--------------------------------------|-----------|-----------|-----------|---------|--------------------------|
| 68 - 91                              | 2699.5125 | 2698.5052 | 2698.3537 | 0.1516  | 0                        |
| <b>K.LGCEVLGVSVD SQFTHLAWINTPR.K</b> |           |           |           |         |                          |
| 92 - 109                             | 1863.0646 | 1862.0573 | 1862.0625 | -0.0052 | 1 R.KEGGLGPLNIPLLADVTR.R |
| 93 - 109                             | 1734.9474 | 1733.9401 | 1733.9675 | -0.0274 | 0 K.EGGLGPLNIPLLADVTR.R  |
| 140 - 150                            | 1211.6064 | 1210.5991 | 1210.6669 | -0.0678 | 0 R.QITVNDLPVGR.S        |

No match to: 1194.5728, 1479.6989, 1716.9480

90) Cartilage homeoprotein 1

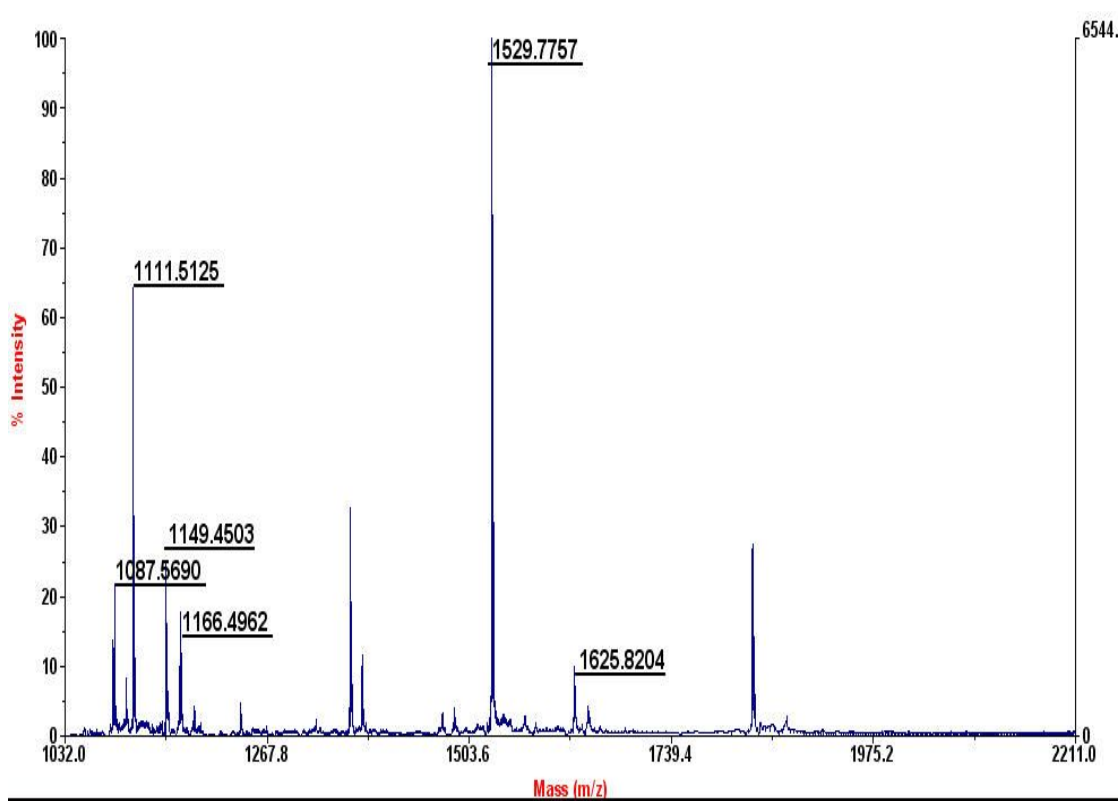

| Start - End | Observed  | Mr(expt)  | Mr(calc)  | Delta   | Miss Sequence                    |
|-------------|-----------|-----------|-----------|---------|----------------------------------|
| 49 - 58     | 1087.5690 | 1086.5618 | 1086.5644 | -0.0026 | 0 K.CVQAFGPLPR.A                 |
| 104 - 113   | 1166.4962 | 1165.4889 | 1165.5471 | -0.0582 | 1 R.MSPVKGMQEK.G 2 Oxidation (M) |
| 123 - 132   | 1111.5125 | 1110.5052 | 1110.4975 | 0.0077  | 1 K.CDSNVSSSKK.R                 |
| 154 - 162   | 1149.4503 | 1148.4430 | 1148.5614 | -0.1184 | 0 K.THYPDVYVR.E                  |
| 163 - 175   | 1529.7757 | 1528.7684 | 1528.8209 | -0.0525 | 1 R.EQLALRTELTEAR.V              |
| 244 - 257   | 1625.8204 | 1624.8131 | 1624.6610 | 0.1521  | 0 R.DTSSCMTPYSHSPR.T             |

No match to: 1165.4588, 1363.6738, 1378.6817, 1833.9952

91) 6-phosphogluconolactonase

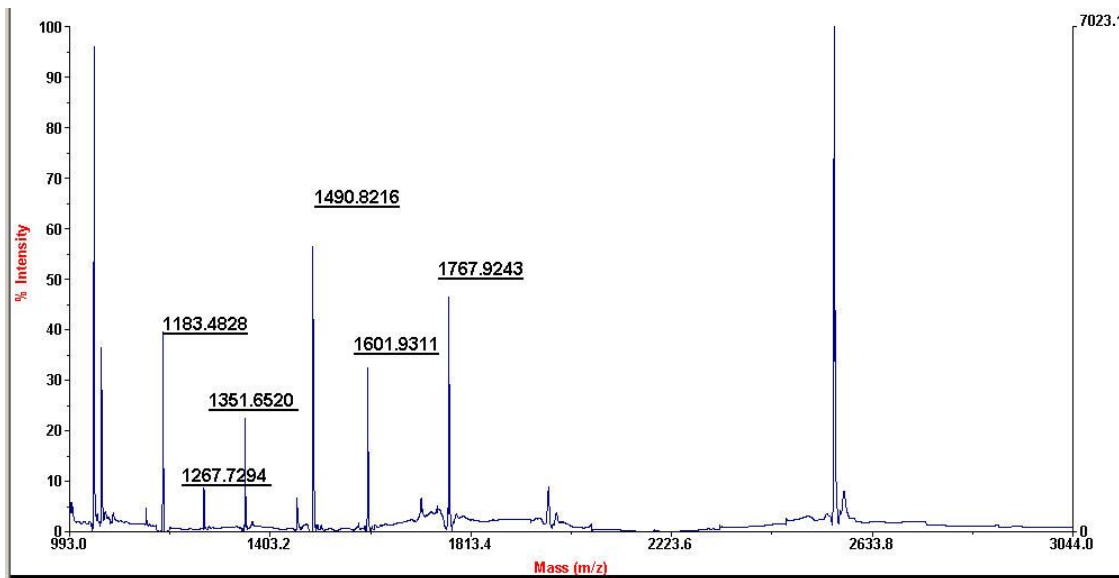

| Start - End | Observed  | Mr(expt)  | Mr(calc)  | Delta   | Miss Sequence          |
|-------------|-----------|-----------|-----------|---------|------------------------|
| 57 - 72     | 1490.8216 | 1489.8143 | 1489.8252 | -0.0109 | 0 R.ELPAAVAPAGPASLAR.W |
| 73 - 81     | 1183.4828 | 1182.4755 | 1182.5128 | -0.0373 | 0 R.WTLGFCDER.L        |
| 82 - 96     | 1767.9243 | 1766.9170 | 1766.8627 | 0.0543  | 0 R.LVPFDHAESTYGLYR.T  |
| 171 - 185   | 1601.9311 | 1600.9238 | 1600.8937 | 0.0302  | 0 K.IVAPISDSPKPPPQR.V  |
| 186 - 197   | 1267.7294 | 1266.7221 | 1266.7659 | -0.0438 | 0 R.VTLTLPVLNAAR.T     |
| 236 - 246   | 1351.6520 | 1350.6447 | 1350.6390 | 0.0057  | 0 K.LCWFLDEAAAR.L      |

92) Heat-shock protein beta-1

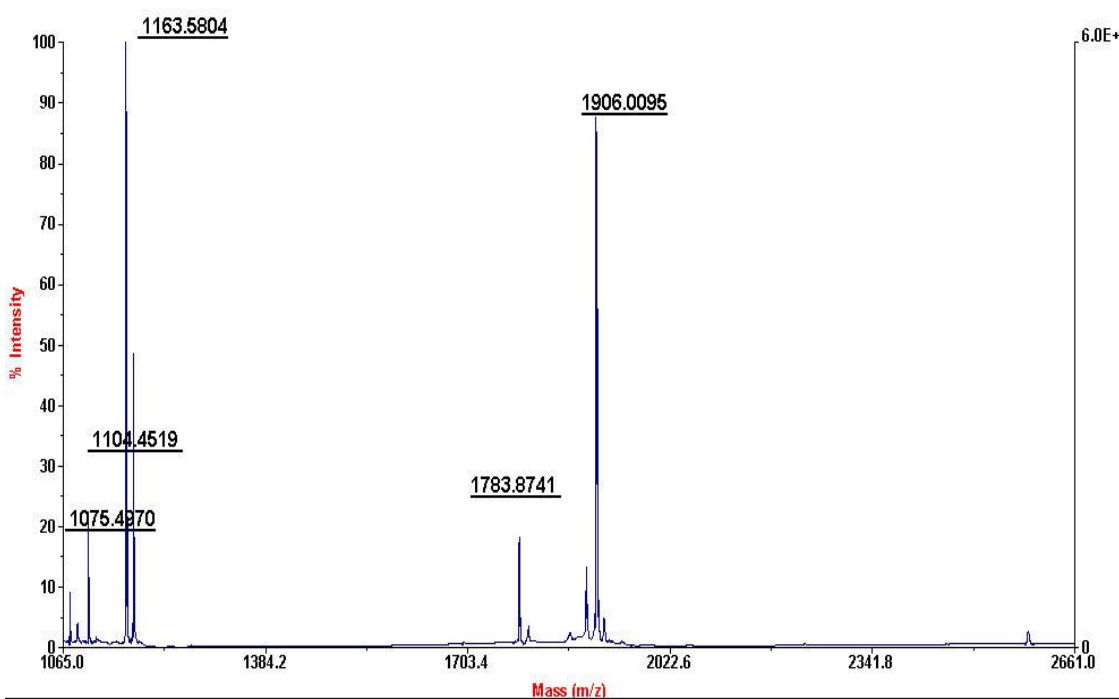

| Start - End | Observed  | Mr(expt)  | Mr(calc)  | Delta   | Miss Sequence           |
|-------------|-----------|-----------|-----------|---------|-------------------------|
| 13 - 20     | 961.3769  | 960.3696  | 960.4453  | -0.0757 | 0 R.GPSWDPFR.D          |
| 21 - 27     | 960.3644  | 959.3572  | 959.4250  | -0.0678 | 0 R.DWYPHSR.L           |
| 28 - 37     | 1163.5804 | 1162.5731 | 1162.6134 | -0.0403 | 0 R.LFDQAFGLPR.L        |
| 80 - 89     | 1075.4970 | 1074.4897 | 1074.5669 | -0.0772 | 0 R.QLSSGVSEIR.H        |
| 97 - 112    | 1783.8741 | 1782.8668 | 1782.9152 | -0.0483 | 0 R.VSLDVNHAFDELTVK.T   |
| 128 - 136   | 1104.4519 | 1103.4446 | 1103.4996 | -0.0550 | 0 R.QDEHGYISR.C         |
| 172 - 188   | 1906.0095 | 1905.0022 | 1904.9843 | 0.0179  | 0 K.LATQSNEITIPVTFESR.A |

No match to: 1175.5698, 1890.0156

93) Mitogen-activated protein kinase kinase kinase 4

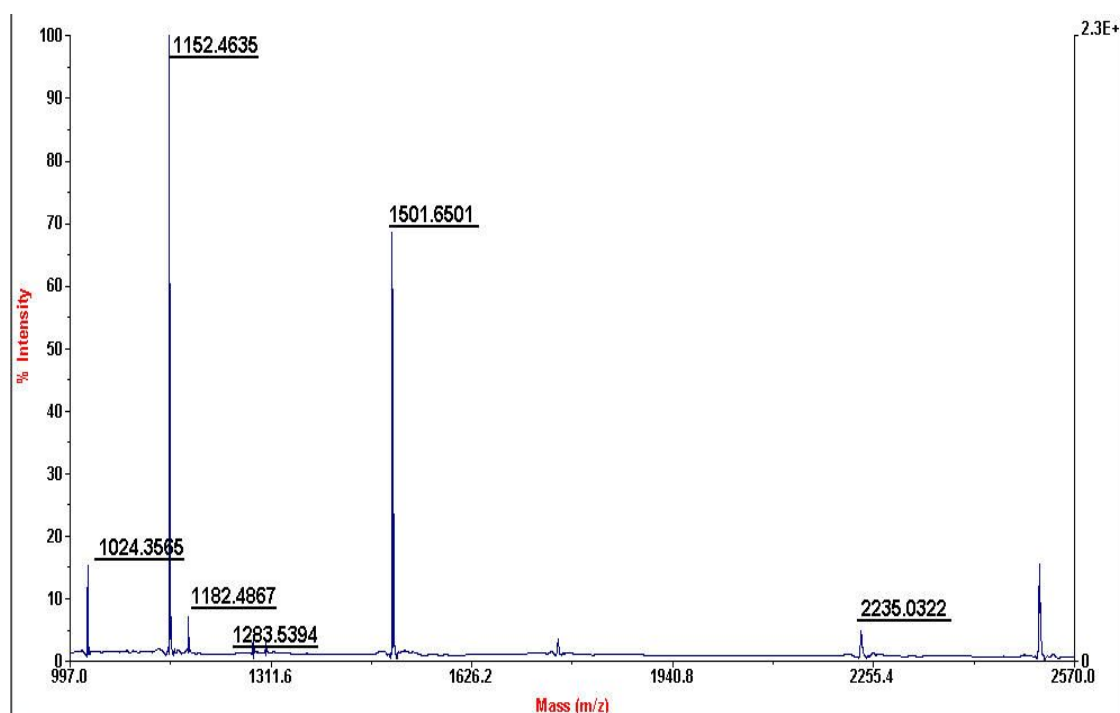

| Start - End | Observed  | Mr(expt)  | Mr(calc)  | Delta   | Miss Sequence              |
|-------------|-----------|-----------|-----------|---------|----------------------------|
| 127 - 135   | 1152.4635 | 1151.4562 | 1151.5611 | -0.1049 | 0 K.EDWIAYISR.E            |
| 373 - 382   | 1283.5394 | 1282.5321 | 1282.6993 | -0.1672 | 0 R.QQLLQEQLR.E            |
| 712 - 725   | 1501.6501 | 1500.6428 | 1500.7532 | -0.1104 | 1 K.SEGSPSQRLNAVK.K        |
| 967 - 986   | 2235.0322 | 2234.0250 | 2234.1980 | -0.1730 | 1 R.FQQMDVLEGLNVLVTISGKK.D |

Oxidation (M)

1205 - 1212 1024.3565 1023.3493 1023.4807 -0.1315 1 K.FLCERNDK.V  
 1210 - 1219 1182.4867 1181.4795 1181.6192 -0.1398 1 R.NDKVFFASVR.S

No match to: 2514.3436

94) 14 kDa phosphohistidine phosphatase

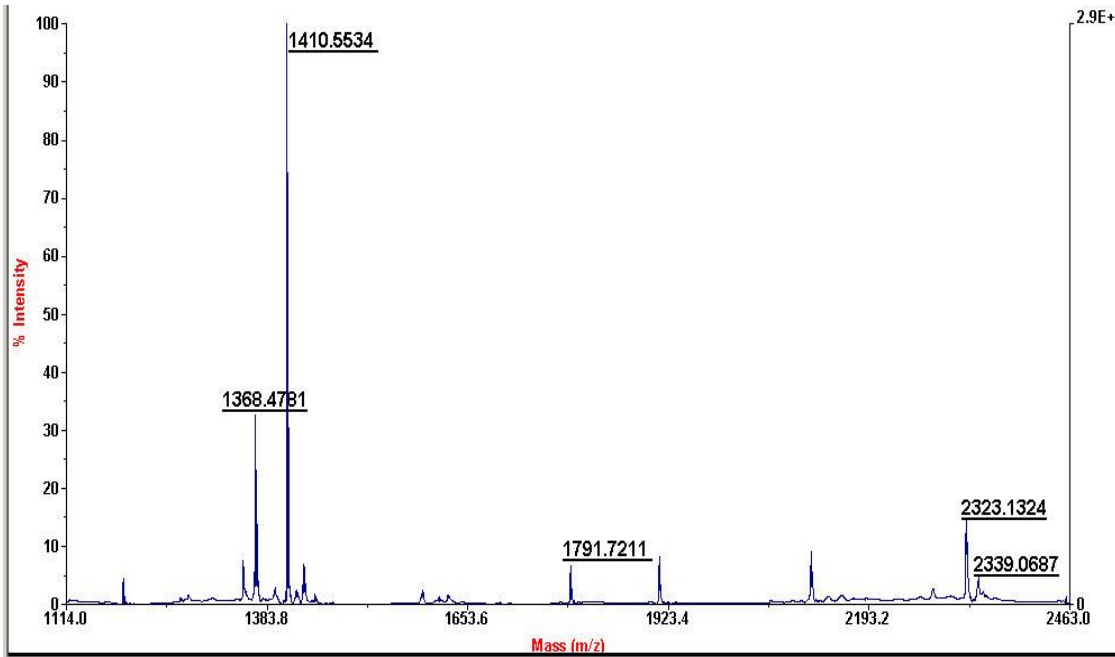

| Start - End | Observed  | Mr(expt)  | Mr(calc)  | Delta   | Miss Sequence              |
|-------------|-----------|-----------|-----------|---------|----------------------------|
| 49 - 59     | 1410.5534 | 1409.5461 | 1409.6252 | -0.0790 | 0 K.WAEYHADIYDK.V          |
| 67 - 78     | 1368.4781 | 1367.4708 | 1367.5016 | -0.0308 | 0 K.QGCDCECLGGGR.I 3       |
| 88 - 108    | 2323.1324 | 2322.1251 | 2322.1102 | 0.0149  | 0 K.IHVGYSMAYGPAQHAISTEK.I |
| 88 - 108    | 2339.0687 | 2338.0614 | 2338.1051 | -0.0438 | 0 K.IHVGYSMAYGPAQHAISTEK.I |

Oxidation (M)

111 - 125 1791.7211 1790.7139 1790.7787 -0.0649 1 K.AKYPDYEVTWANDGY.-

No match to: 1190.4344, 1351.4492, 1432.5530, 1910.9165, 2115.0565

95) TBA3\_HUMAN



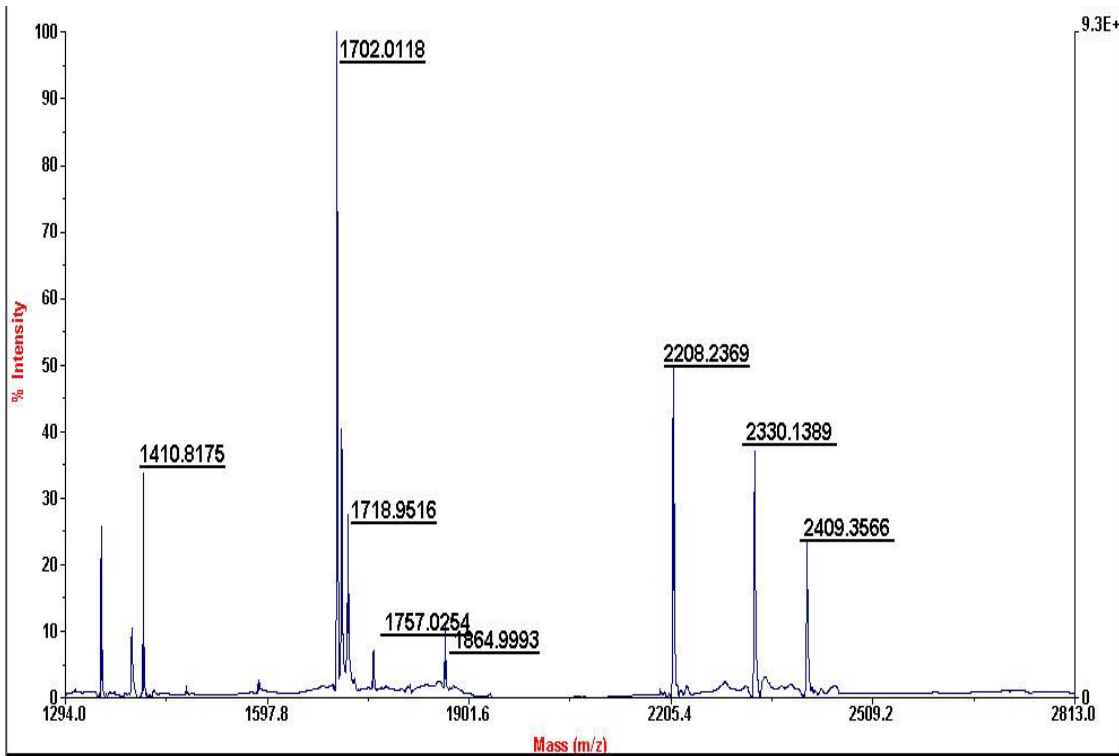

| Start - End | Observed  | Mr(expt)  | Mr(calc)  | Delta  | Miss Sequence               |
|-------------|-----------|-----------|-----------|--------|-----------------------------|
| 65 - 79     | 1702.0118 | 1701.0045 | 1700.8984 | 0.1061 | 0 R.AVFVDLEPTVIDEVR.T       |
| 85 - 96     | 1410.8175 | 1409.8102 | 1409.7667 | 0.0435 | 0 R.QLFHPEQLITGK.E          |
| 216 - 229   | 1718.9516 | 1717.9443 | 1717.8747 | 0.0696 | 0 R.NLDIERPTYTNLNR.L        |
| 244 - 264   | 2409.3566 | 2408.3493 | 2408.2012 | 0.1482 | 0 R.FDGALNVDLTEFQTNLVPYPR.I |
| 265 - 280   | 1757.0254 | 1756.0181 | 1755.9559 | 0.0622 | 0 R.IHFPLATYAPVISA EK.A     |
| 353 - 373   | 2208.2369 | 2207.2296 | 2207.2062 | 0.0234 | 1 K.VGINYQPPTVVPGGDLAKVQR.A |
| 374 - 390   | 1864.9993 | 1863.9920 | 1863.8971 | 0.0949 | 0 R.AVCMLSNTTAIAEAWAR.L     |
| 403 - 422   | 2330.1389 | 2329.1316 | 2329.0109 | 0.1208 | 0 R.AFVHWYVGEGMEEGEFSEAR.E  |

No match to: 1347.7789, 1393.7947, 1708.9361, 3350.8559

96) Tubulin alpha-ubiquitous chain

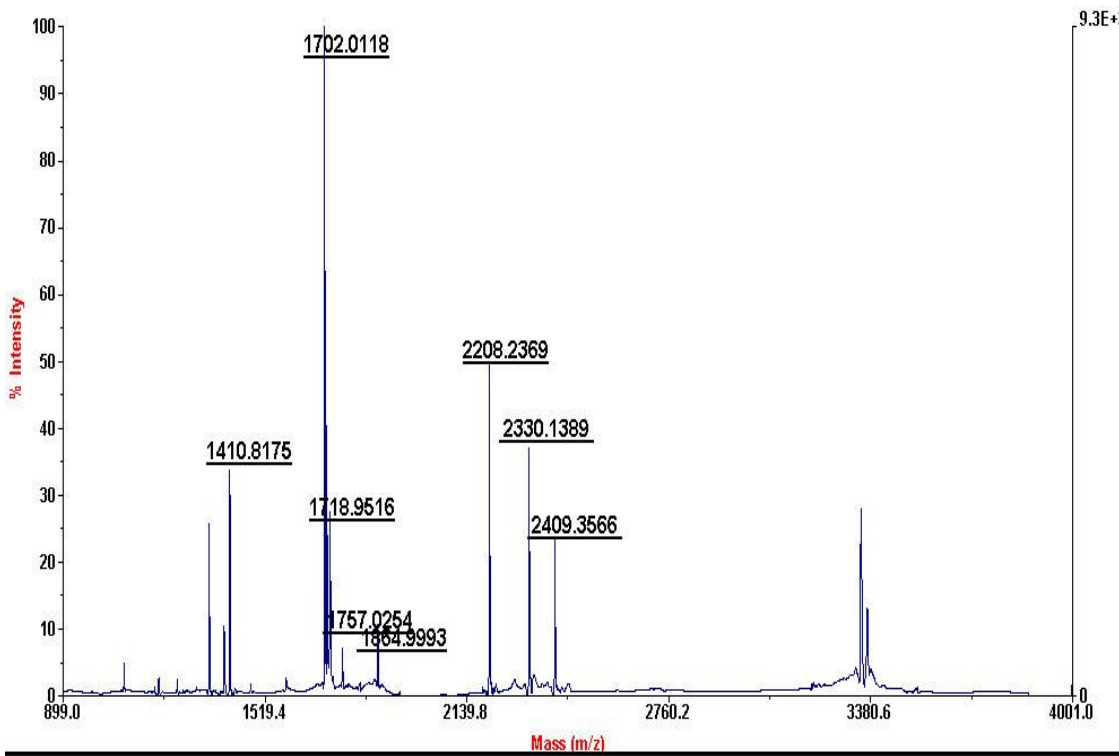

| Start - End | Observed  | Mr(expt)  | Mr(calc)  | Delta  | Miss Sequence               |
|-------------|-----------|-----------|-----------|--------|-----------------------------|
| 65 - 79     | 1702.0118 | 1701.0045 | 1700.8984 | 0.1061 | 0 R.AVFVDLEPTVIDEVR.T       |
| 85 - 96     | 1410.8175 | 1409.8102 | 1409.7667 | 0.0435 | 0 R.QLFHPEQLITGK.E          |
| 216 - 229   | 1718.9516 | 1717.9443 | 1717.8747 | 0.0696 | 0 R.NLDIERPTYTNLNR.L        |
| 244 - 264   | 2409.3566 | 2408.3493 | 2408.2012 | 0.1482 | 0 R.FDGALNVDLTEFQTNLVPYPR.I |
| 265 - 280   | 1757.0254 | 1756.0181 | 1755.9559 | 0.0622 | 0 R.IHFPLATYAPVISA EK.A     |
| 353 - 373   | 2208.2369 | 2207.2296 | 2207.2062 | 0.0234 | 1 K.VGINYQPPTVVPGGDLAKVQR.A |
| 374 - 390   | 1864.9993 | 1863.9920 | 1863.8971 | 0.0949 | 0 R.AVCMLSNTTAIAEAWAR.L     |
| 403 - 422   | 2330.1389 | 2329.1316 | 2329.0109 | 0.1208 | 0 R.AFVHWYVGEGMEEGEFSEAR.E  |

No match to: 1347.7789, 1393.7947, 1708.9361, 3350.8559

97) Protein S100-A11

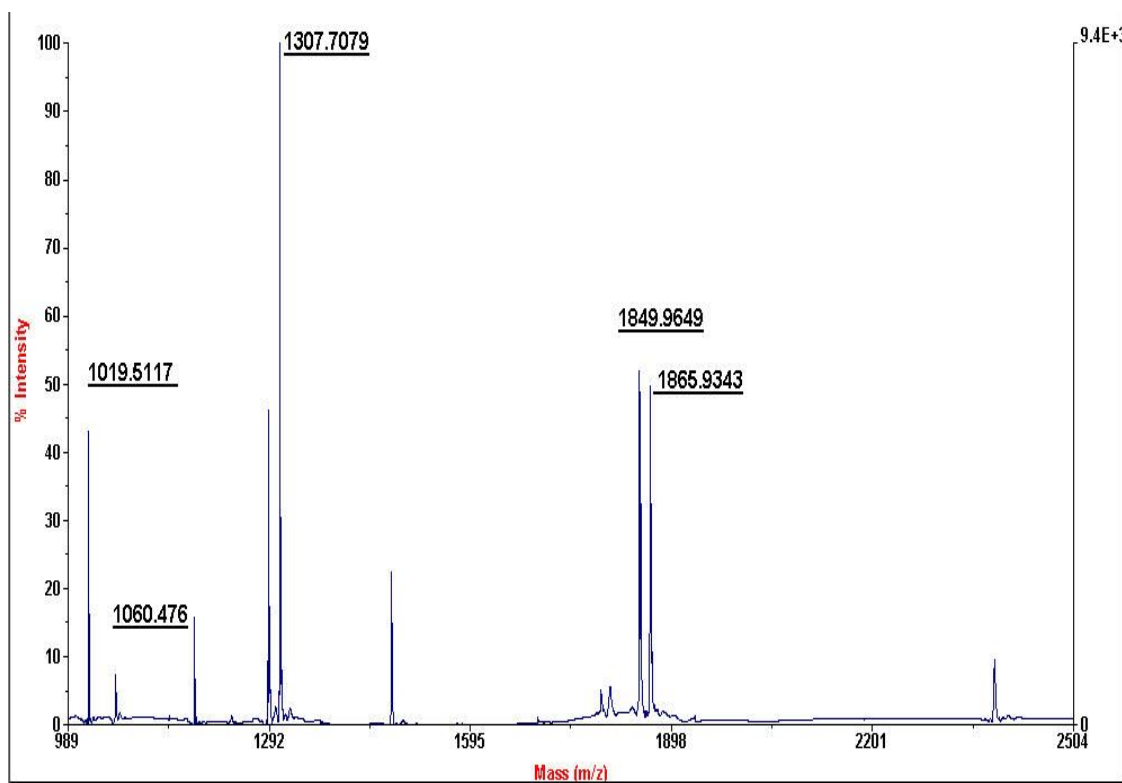

| Start - End | Observed  | Mr(expt)  | Mr(calc)  | Delta   | Miss Sequence                     |
|-------------|-----------|-----------|-----------|---------|-----------------------------------|
| 4 - 12      | 1019.5117 | 1018.5044 | 1018.4931 | 0.0113  | 0 K.ISSPTETER.C                   |
| 13 - 23     | 1307.7079 | 1306.7007 | 1306.6955 | 0.0052  | 0 R.CIESLIAVFQK.Y                 |
| 28 - 36     | 1060.4760 | 1059.4687 | 1059.4873 | -0.0185 | 0 K.DGYNYTLISK.T                  |
| 37 - 52     | 1849.9649 | 1848.9576 | 1848.8967 | 0.0609  | 0 K.TEFLSFMNTELA AFTK.N           |
| 37 - 52     | 1865.9343 | 1864.9270 | 1864.8916 | 0.0353  | 0 K.TEFLSFMNTELA AFTK.N Oxidation |

(M)

No match to: 1179.6106, 1290.6898, 1475.7855, 2384.0918

98) Alpha-1-antiproteinase

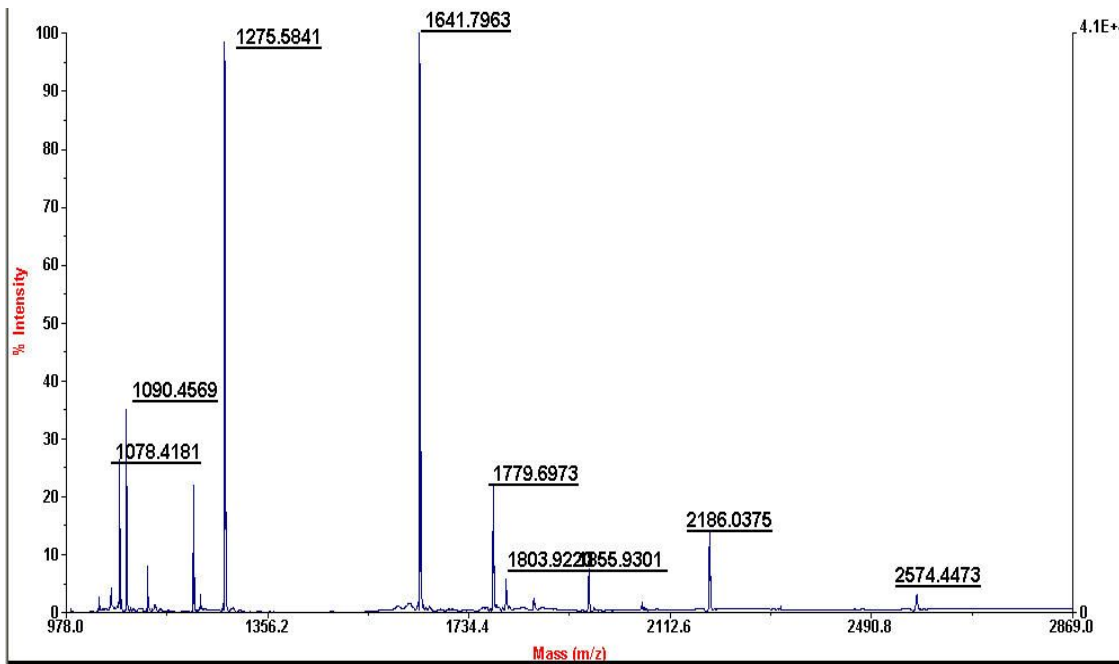

| Start - End | Observed  | Mr(expt)  | Mr(calc)  | Delta   | Miss Sequence                  |
|-------------|-----------|-----------|-----------|---------|--------------------------------|
| 35 - 49     | 1779.6973 | 1778.6900 | 1778.7608 | -0.0708 | 0 K.TDTSHHDQDHPTFNK.I          |
| 50 - 63     | 1641.7963 | 1640.7890 | 1640.8562 | -0.0671 | 0 K.ITPNLAEFASLYR.Q            |
| 126 - 149   | 2574.4473 | 2573.4400 | 2573.3336 | 0.1063  | 0 R.TLNQPDSQLQLTTGNGLFLSEGLK.L |
| 161 - 179   | 2186.0375 | 2185.0302 | 2185.0327 | -0.0024 | 1 K.LYHSEAFTVNFGDTEEAKK.Q      |
| 216 - 225   | 1275.5841 | 1274.5768 | 1274.6771 | -0.1003 | 1 K.GKWERPFEVK.D               |
| 218 - 225   | 1090.4569 | 1089.4496 | 1089.5607 | -0.1111 | 0 K.WERPFEVK.D                 |
| 284 - 298   | 1803.9220 | 1802.9147 | 1802.9526 | -0.0379 | 0 K.LQHLENELTHDIITK.F          |
| 299 - 305   | 922.3266  | 921.3193  | 921.4192  | -0.0999 | 0 K.FLENEDR.R                  |
| 299 - 306   | 1078.4181 | 1077.4108 | 1077.5203 | -0.1095 | 1 K.FLENEDRR.S                 |
| 390 - 404   | 1855.9301 | 1854.9228 | 1854.9702 | -0.0473 | 0 K.FNKPFVFLMIEQNTK.S          |

No match to: 1130.4992, 1143.5468, 1216.5306, 1229.5192, 1958.9340

99) Vimentin

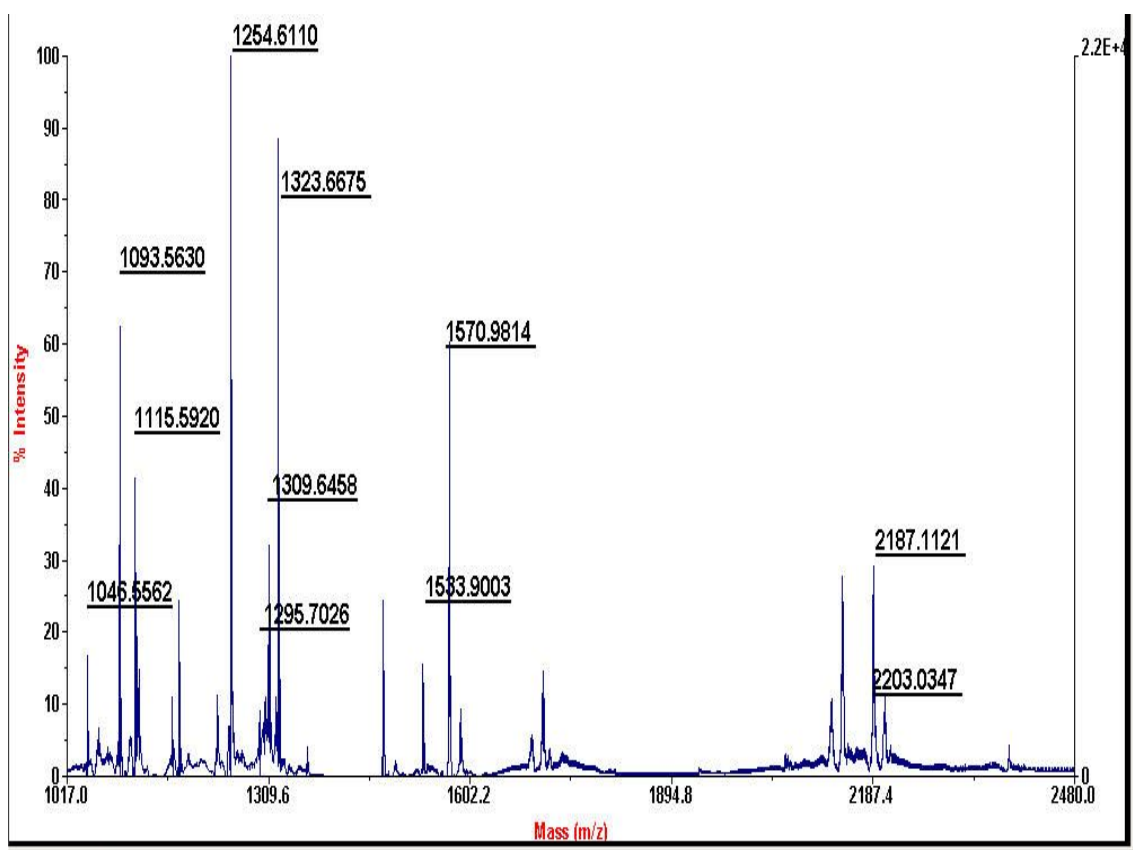

| Start - End   | Observed  | Mr(expt)  | Mr(calc)  | Delta  | Miss Sequence             |
|---------------|-----------|-----------|-----------|--------|---------------------------|
| 105 - 113     | 1115.5920 | 1114.5848 | 1114.5618 | 0.0229 | 0 K.VELQELNDR.F           |
| 146 - 155     | 1254.6110 | 1253.6037 | 1253.5598 | 0.0439 | 0 R.LGDLYEEEMR.E          |
| 189 - 196     | 1046.5562 | 1045.5489 | 1045.5226 | 0.0263 | 0 K.LQEEMLQR.E            |
| 197 - 207     | 1323.6675 | 1322.6602 | 1322.6102 | 0.0500 | 0 R.EEAENTLQSFR.Q         |
| 224 - 236     | 1533.9003 | 1532.8930 | 1532.8449 | 0.0480 | 1 K.VESLQEEIAFLKK.L       |
| 283 - 292     | 1309.6458 | 1308.6385 | 1308.5986 | 0.0399 | 0 K.NLQEAEEWYK.S          |
| 295 - 304     | 1093.5630 | 1092.5557 | 1092.5199 | 0.0358 | 0 K.FADLSEAANR.N          |
| 346 - 364     | 2187.1121 | 2186.1048 | 2185.9585 | 0.1463 | 0 R.EMEENFAVEAANYQDTIGR.L |
| 346 - 364     | 2203.0347 | 2202.0274 | 2201.9534 | 0.0740 | 0 R.EMEENFAVEAANYQDTIGR.L |
| Oxidation (M) |           |           |           |        |                           |
| 391 - 401     | 1295.7026 | 1294.6953 | 1294.6591 | 0.0362 | 0 K.MALDIEIATYR.K         |
| 411 - 424     | 1570.9814 | 1569.9741 | 1569.8878 | 0.0863 | 0 R.ISLPLPNFSSLNLR.E      |

No match to: 1179.6232, 1475.8160, 1707.8506

101 ) Annexin A5

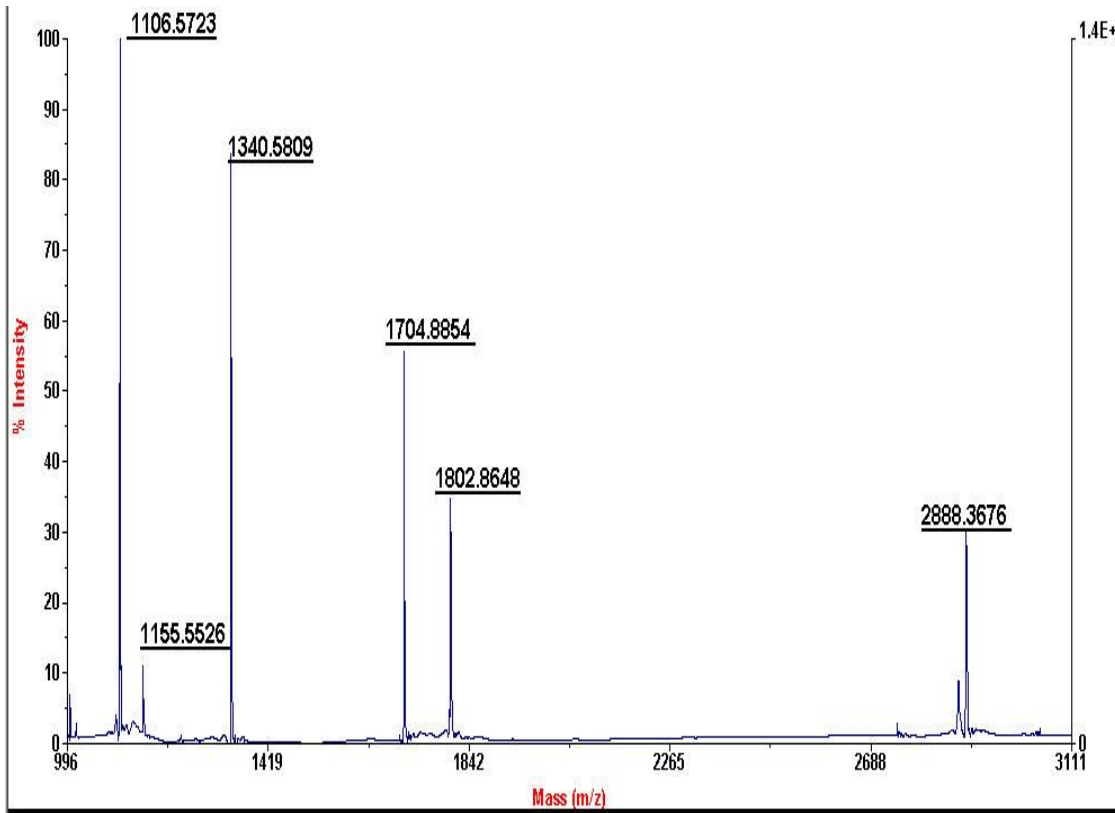

| Start - End                          | Observed  | Mr(expt)  | Mr(calc)  | Delta   | Miss Sequence          |
|--------------------------------------|-----------|-----------|-----------|---------|------------------------|
| 7 - 18                               | 1340.5809 | 1339.5737 | 1339.6044 | -0.0307 | 0 R.GTVTDFPGFDER.A     |
| 30 - 45                              | 1704.8854 | 1703.8782 | 1703.8941 | -0.0159 | 0 K.GLGTDEESILTLTTSR.S |
| 127 - 151                            | 2888.3676 | 2887.3603 | 2887.2307 | 0.1296  | 0                      |
| <b>K.QVYEEYYGSSLEDDVVGDTSGYYQR.M</b> |           |           |           |         |                        |
| 194 - 201                            | 954.5269  | 953.5196  | 953.5334  | -0.0138 | 0 K.FITIFGTR.S         |
| 213 - 227                            | 1802.8648 | 1801.8575 | 1801.8556 | 0.0019  | 0 K.YMTISGFQIEETIDR.E  |
| 261 - 271                            | 1155.5526 | 1154.5454 | 1154.5680 | -0.0226 | 0 K.GAGTDDHTLIR.V      |
| 277 - 285                            | 1106.5723 | 1105.5651 | 1105.5767 | -0.0117 | 0 R.SEIDLFNIR.K        |

No match to: 909.0362, 911.0325, 946.9072

102 ) 14-3-3 protein epsilon

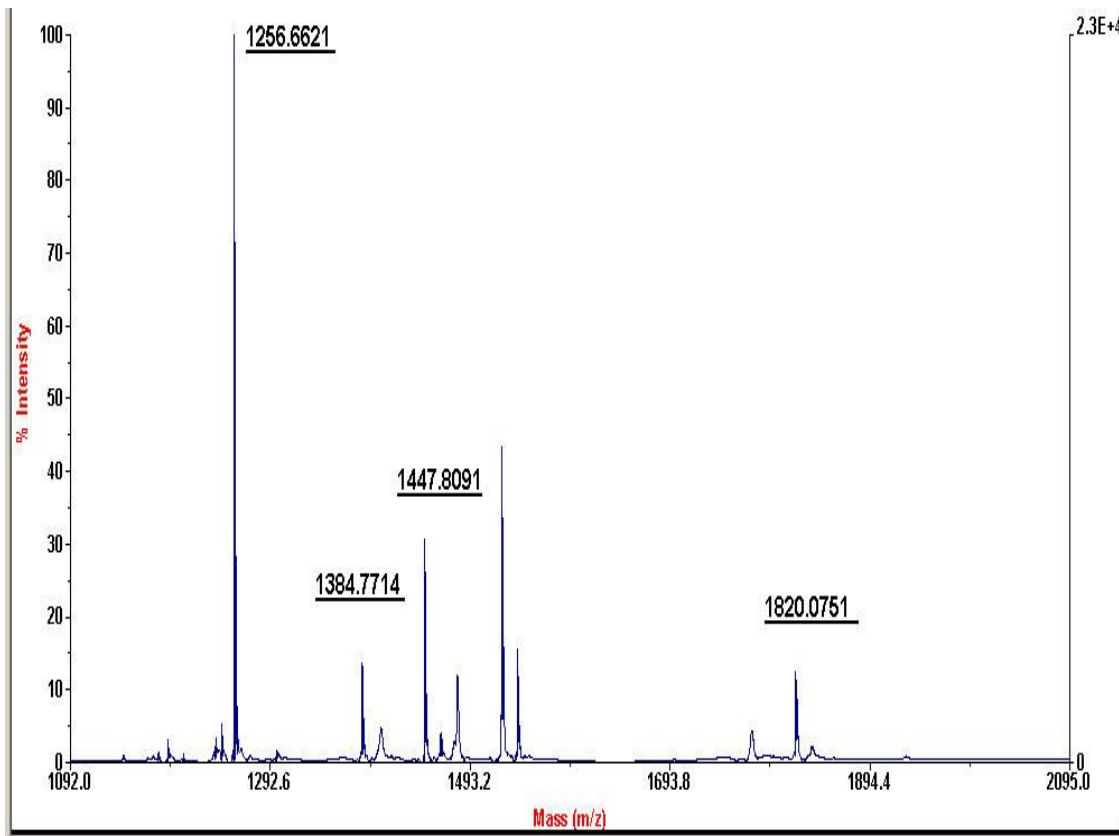

| Start - End | Observed  | Mr(expt)  | Mr(calc)  | Delta  | Miss Sequence               |
|-------------|-----------|-----------|-----------|--------|-----------------------------|
| 30 - 42     | 1447.8091 | 1446.8018 | 1446.7024 | 0.0994 | 0 K.VAGMDVELTVEER.N         |
| 124 - 130   | 906.4573  | 905.4501  | 905.4177  | 0.0323 | 1 K.MKGDYHR.Y               |
| 124 - 130   | 922.4443  | 921.4370  | 921.4127  | 0.0243 | 1 K.MKGDYHR.Y Oxidation (M) |
| 131 - 141   | 1256.6621 | 1255.6548 | 1255.5833 | 0.0715 | 0 R.YLAEFATGNDR.K           |
| 131 - 142   | 1384.7714 | 1383.7642 | 1383.6782 | 0.0859 | 1 R.YLAEFATGNDRK.E          |
| 154 - 170   | 1820.0751 | 1819.0679 | 1818.9298 | 0.1381 | 0 K.AASDIAMTELPPTHPIR.L     |

No match to: 1524.8188, 1540.7845

103 ) Tubulin alpha-6 chain

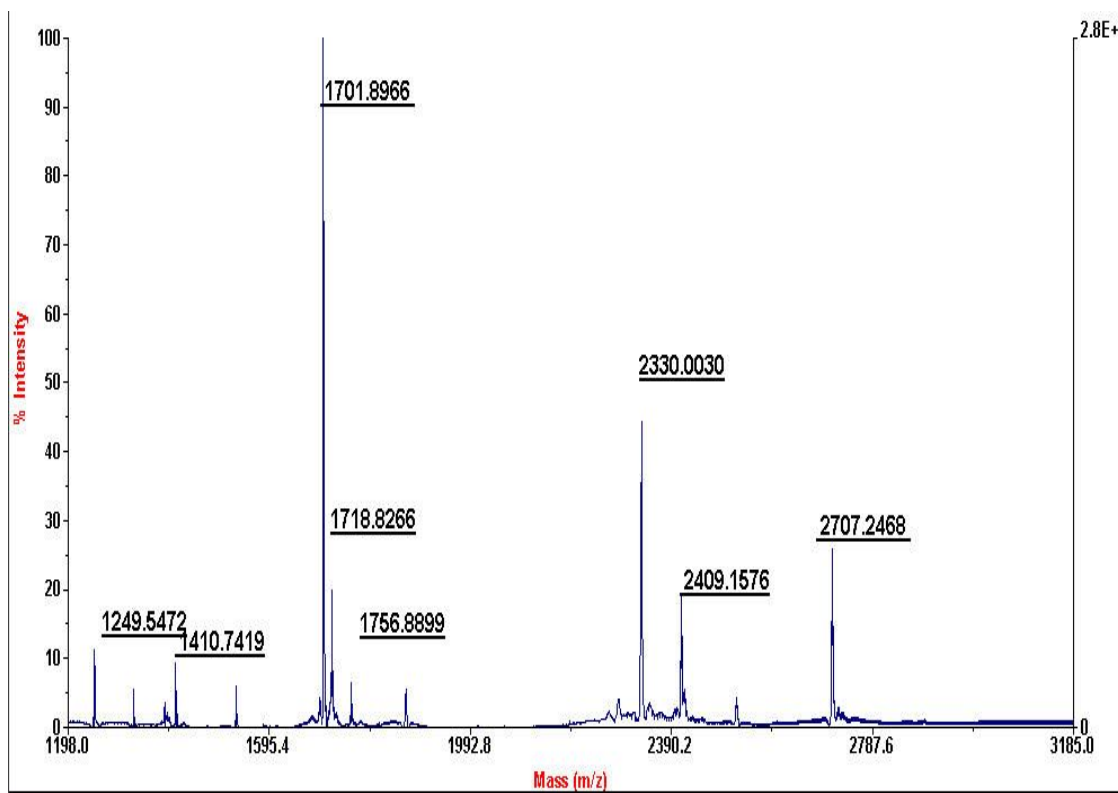

| Start - End | Observed  | Mr(expt)  | Mr(calc)  | Delta   | Miss Sequence                  |
|-------------|-----------|-----------|-----------|---------|--------------------------------|
| 65 - 79     | 1701.8966 | 1700.8893 | 1700.8984 | -0.0091 | 0 R.AVFVDLEPTVIDEVR.T          |
| 85 - 96     | 1410.7419 | 1409.7346 | 1409.7667 | -0.0321 | 0 R.QLFHPEQLITGK.E             |
| 216 - 229   | 1718.8266 | 1717.8193 | 1717.8747 | -0.0554 | 0 R.NLDIERPTYTNLNR.L           |
| 244 - 264   | 2409.1576 | 2408.1503 | 2408.2012 | -0.0509 | 0 R.FDGALNVDLTEFQTNLVPYPR.I    |
| 265 - 280   | 1756.8899 | 1755.8826 | 1755.9559 | -0.0733 | 0 R.IHFPLATYAPVISA.EK.A        |
| 281 - 304   | 2707.2468 | 2706.2395 | 2706.2781 | -0.0386 | 0 K.AYHEQLTVAEITNACFEPANQMVK.C |
| 312 - 320   | 1249.5472 | 1248.5399 | 1248.5453 | -0.0054 | 0 K.YMACCLLYR.G 2              |
| 403 - 422   | 2330.0030 | 2328.9957 | 2329.0109 | -0.0151 | 0 R.AFVHWYVGGEMEEGEFSEAR.E     |

No match to: 915.4490, 1326.7436, 1388.6606, 1529.7669, 1864.8819, 2286.1939

104 ) Tubulin alpha-ubiquitous chain



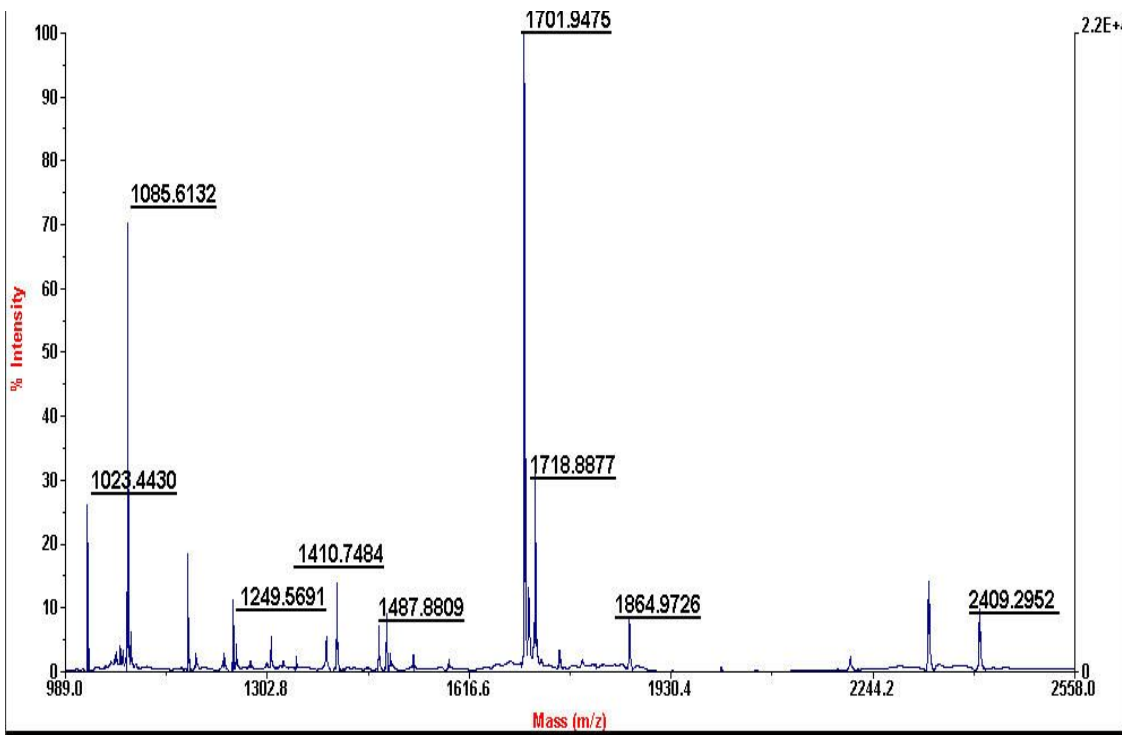

| Start - End | Observed  | Mr(expt)  | Mr(calc)  | Delta   | Miss Sequence               |
|-------------|-----------|-----------|-----------|---------|-----------------------------|
| 65 - 79     | 1701.9475 | 1700.9402 | 1700.8984 | 0.0418  | 0 R.AVFVDLEPTVIDEVR.T       |
| 85 - 96     | 1410.7484 | 1409.7411 | 1409.7667 | -0.0255 | 0 R.QLFHPEQLITGK.E          |
| 97 - 105    | 1023.4430 | 1022.4357 | 1022.4417 | -0.0060 | 0 K.EDAANNYAR.G             |
| 113 - 121   | 1085.6132 | 1084.6060 | 1084.6128 | -0.0068 | 0 K.EIIDLVLDRI              |
| 216 - 229   | 1718.8877 | 1717.8804 | 1717.8747 | 0.0057  | 0 R.NLDIERPTYTNLNR.L        |
| 230 - 243   | 1487.8809 | 1486.8736 | 1486.8719 | 0.0018  | 0 R.LISQIVSSITASLR.F        |
| 244 - 264   | 2409.2952 | 2408.2879 | 2408.2012 | 0.0868  | 0 R.FDGALNVDLTEFQTNLVPYPR.I |
| 265 - 280   | 1756.9540 | 1755.9467 | 1755.9559 | -0.0092 | 0 R.IHFPLATYAPVISA EK.A     |
| 312 - 320   | 1249.5691 | 1248.5619 | 1248.5453 | 0.0165  | 0 K.YMACCLLYR.G 2           |
| 374 - 390   | 1864.9726 | 1863.9654 | 1863.8971 | 0.0683  | 0 R.AVCMLSNTTAIAEAWAR.L     |
| 403 - 422   | 2330.1230 | 2329.1157 | 2329.0109 | 0.1049  | 0 R.AFVHWYV GEGMEEGEFSEAR.E |

No match to: 915.4555, 1179.6035, 1307.6867, 1475.7585, 1708.8631

105 ) 78 kDa glucose-regulated protein precursor

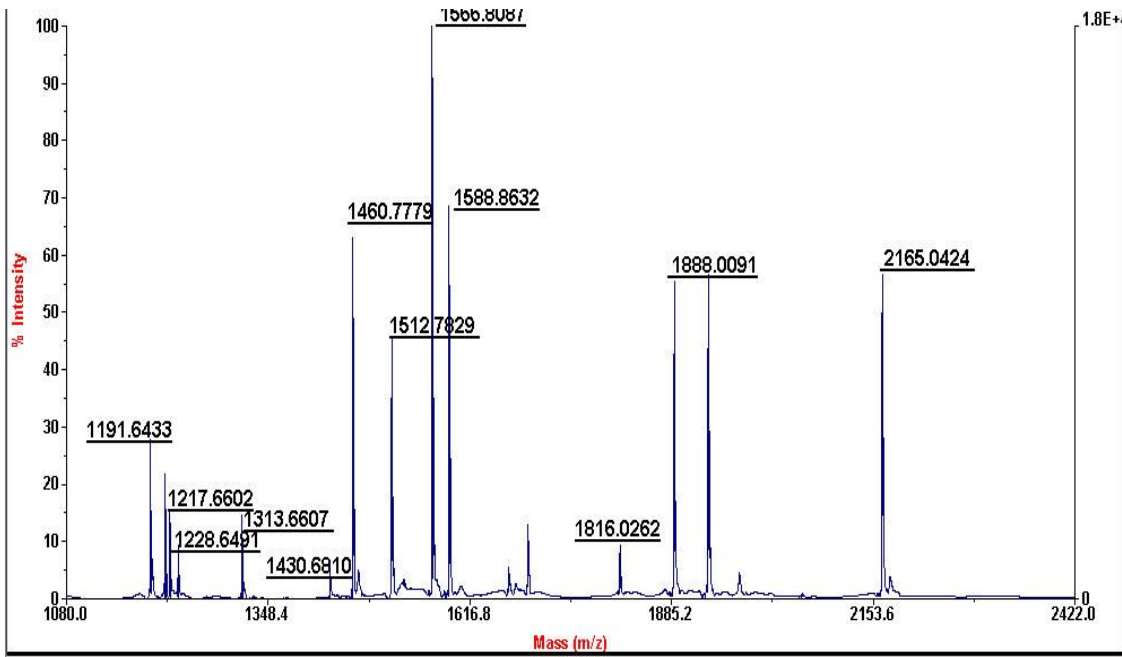

| Start - End | Observed  | Mr(expt)  | Mr(calc)  | Delta   | Miss Sequence            |
|-------------|-----------|-----------|-----------|---------|--------------------------|
| 50 - 60     | 1228.6491 | 1227.6418 | 1227.6207 | 0.0211  | 0 R.VEIIANDQGNR.I        |
| 61 - 74     | 1566.8087 | 1565.8015 | 1565.7725 | 0.0289  | 0 R.ITPSYVAFTPEGER.L     |
| 102 - 113   | 1430.6810 | 1429.6737 | 1429.6837 | -0.0100 | 0 R.TWNDPSVQQDIK.F       |
| 165 - 181   | 1888.0091 | 1887.0018 | 1886.9638 | 0.0380  | 0 K.VTHAVVTVPAYFNDAQR.Q  |
| 186 - 197   | 1217.6602 | 1216.6529 | 1216.6234 | 0.0296  | 0 K.DAGTIAGLNVMR.I       |
| 198 - 214   | 1816.0262 | 1815.0189 | 1814.9890 | 0.0299  | 1 R.IINEPTAAAIAYGLDKR.E  |
| 298 - 306   | 997.5420  | 996.5347  | 996.5101  | 0.0246  | 0 R.ALSSQHQR.I           |
| 307 - 324   | 2165.0424 | 2164.0351 | 2163.9847 | 0.0503  | 0 R.IEIESFYEGEDFSETLTR.A |
| 325 - 336   | 1512.7829 | 1511.7756 | 1511.7442 | 0.0314  | 1 R.AKFEELNMDLFR.S       |
| 327 - 336   | 1313.6607 | 1312.6534 | 1312.6121 | 0.0413  | 0 K.FEELNMDLFR.S         |
| 353 - 367   | 1588.8632 | 1587.8559 | 1587.8467 | 0.0091  | 1 K.KSDIDEIVLVGGSTR.I    |
| 354 - 367   | 1460.7779 | 1459.7706 | 1459.7518 | 0.0188  | 0 K.SDIDEIVLVGGSTR.I     |
| 465 - 474   | 1191.6433 | 1190.6360 | 1190.6295 | 0.0065  | 0 K.VYEGERPLTK.D         |
| 475 - 492   | 1934.0573 | 1933.0501 | 1933.0057 | 0.0443  | 0 K.DNHLLGTFDLTGIPPAPR.G |
| 524 - 532   | 1074.5835 | 1073.5762 | 1073.5465 | 0.0297  | 0 K.ITITNDQNR.L          |
| 533 - 540   | 986.5365  | 985.5293  | 985.5080  | 0.0213  | 0 R.LTPEEIER.M           |

No match to: 1024.5785, 1211.6066, 1693.8921

106 ) Alpha-1-acid glycoprotein 1 precursor

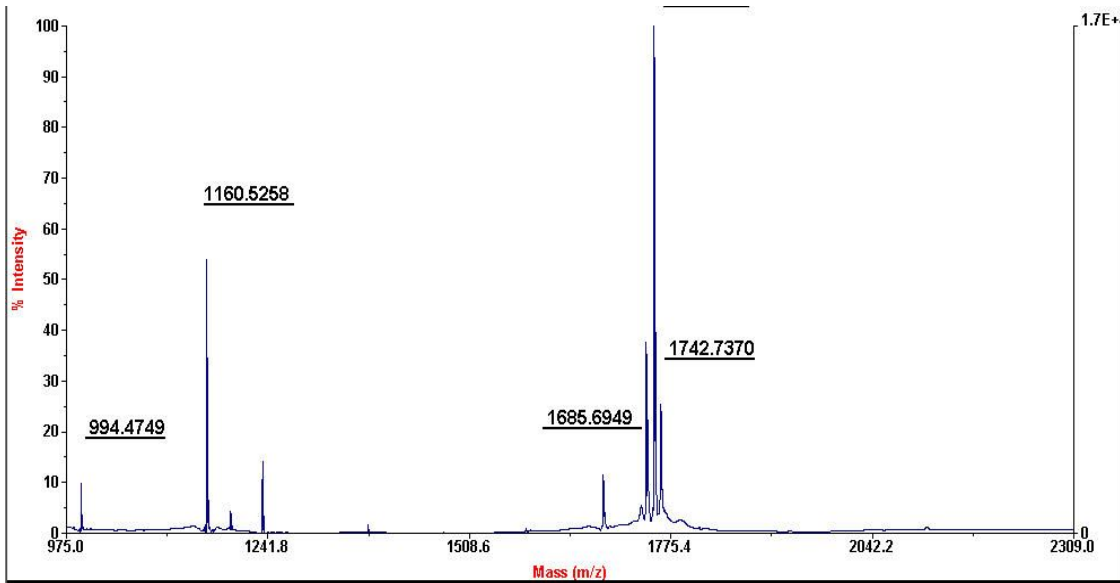

| Start - End | Observed  | Mr(expt)  | Mr(calc)  | Delta   | Miss Sequence         |
|-------------|-----------|-----------|-----------|---------|-----------------------|
| 43 - 51     | 1160.5258 | 1159.5186 | 1159.5814 | -0.0628 | 0 K.WFYIASAFR.N       |
| 74 - 81     | 994.4749  | 993.4677  | 993.5131  | -0.0454 | 0 K.TEDTIFLR.E        |
| 109 - 123   | 1752.8589 | 1751.8516 | 1751.9471 | -0.0954 | 0 R.YVGGQEHFAHLLILR.D |
| 154 - 167   | 1685.6949 | 1684.6877 | 1684.7766 | -0.0890 | 0 K.EQLGEFYEALDCLR.I  |
| 154 - 167   | 1742.7370 | 1741.7297 | 1741.7981 | -0.0684 | 0 K.EQLGEFYEALDCLR.I  |

No match to: 1192.5193, 1234.6381, 1374.5800, 1761.6782

107 ) Serotransferrin precursor

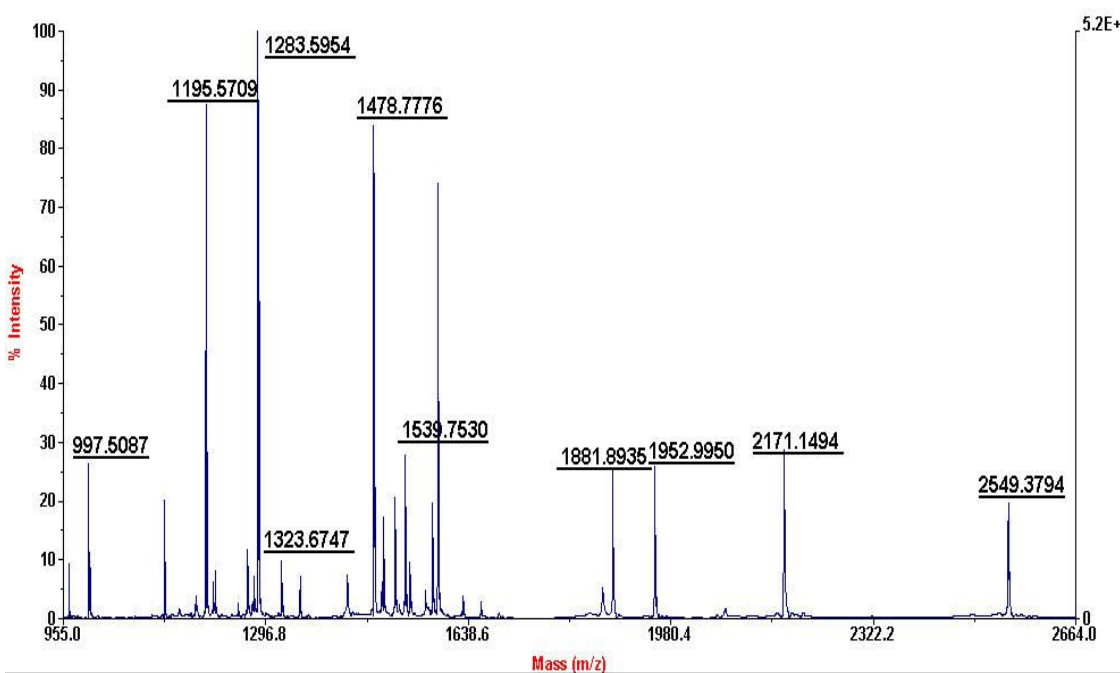

| Start - End | Observed  | Mr(expt)  | Mr(calc)  | Delta   | Miss Sequence                    |
|-------------|-----------|-----------|-----------|---------|----------------------------------|
| 62 - 69     | 997.5087  | 996.5014  | 996.4698  | 0.0315  | 0 K.ASYLDCIR.A                   |
| 122 - 132   | 1323.6747 | 1322.6674 | 1322.6401 | 0.0273  | 1 K.KDSGFQMNQLR.G                |
| 123 - 132   | 1195.5709 | 1194.5636 | 1194.5451 | 0.0185  | 0 K.DSGFQMNQLR.G                 |
| 144 - 162   | 2171.1494 | 2170.1421 | 2170.0881 | 0.0540  | 0 R.SAGWNIPIGLLYCDLPEPR.K        |
| 237 - 251   | 1881.8935 | 1880.8862 | 1880.8687 | 0.0176  | 1 K.ADRDQYELLCLDNTR.K            |
| 240 - 251   | 1539.7530 | 1538.7457 | 1538.7035 | 0.0422  | 0 R.DQYELLCLDNTR.K               |
| 252 - 273   | 2549.3794 | 2548.3721 | 2548.2856 | 0.0866  | 1 R.KPVDEYKDCHLAQVPSHTVVAR.S     |
| 332 - 343   | 1478.7776 | 1477.7704 | 1477.7275 | 0.0429  | 0 K.MYLGYEYVTAIR.N               |
| 332 - 343   | 1494.7339 | 1493.7266 | 1493.7224 | 0.0042  | 0 K.MYLGYEYVTAIR.N Oxidation (M) |
| 454 - 466   | 1434.8600 | 1433.8527 | 1433.7150 | 0.1377  | 1 K.SASDLTWDNLK GK.K             |
| 495 - 508   | 1577.7146 | 1576.7073 | 1576.6503 | 0.0569  | 0 R.FDEFFSEGCAPGSK.K             |
| 531 - 541   | 1283.5954 | 1282.5882 | 1282.5618 | 0.0264  | 0 K.EGYGYTGAFR.C                 |
| 572 - 587   | 1952.9950 | 1951.9877 | 1951.9309 | 0.0568  | 1 K.NLNEKDYELLCLDGTR.K           |
| 577 - 587   | 1354.6696 | 1353.6623 | 1353.6234 | 0.0389  | 0 K.DYELLCLDGTR.K                |
| 588 - 600   | 1586.8035 | 1585.7962 | 1585.7671 | 0.0292  | 0 R.KPVEEYANCHLAR.A              |
| 601 - 609   | 964.5322  | 963.5249  | 963.5250  | -0.0000 | 0 R.APNHAVVTR.K                  |
| 613 - 621   | 1125.6014 | 1124.5941 | 1124.6124 | -0.0183 | 1 K.EACVHKILR.Q                  |
| 684 - 696   | 1531.7133 | 1530.7060 | 1530.6806 | 0.0254  | 0 K.CSTSSLLEACTFR.R 2            |

No match to: 1265.5937, 1514.7012

108 ) Transketolase

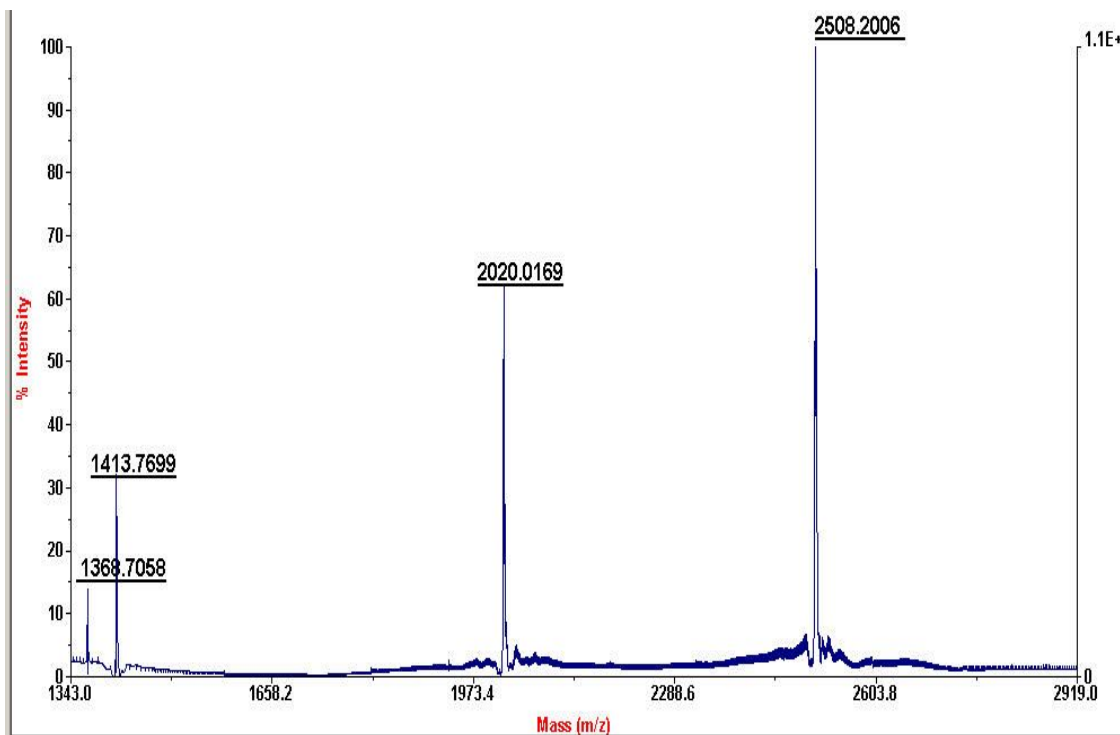

| Start - End | Observed  | Mr(expt)  | Mr(calc)  | Delta   | Miss Sequence                |
|-------------|-----------|-----------|-----------|---------|------------------------------|
| 175 - 186   | 1368.7058 | 1367.6985 | 1367.7772 | -0.0787 | 0 K.LDNLVAILDINR.L           |
| 284 - 302   | 2020.0169 | 2019.0097 | 2019.0636 | -0.0540 | 0 K.ILATPPQEDAPSVDIANIR.M    |
| 472 - 493   | 2508.2006 | 2507.1933 | 2507.2040 | -0.0107 | 0 R.TSRPENAIHYNNNEDFQVGQAK.V |
| 531 - 542   | 1413.7699 | 1412.7626 | 1412.8027 | -0.0401 | 0 R.VLDPFTIKPLDR.K           |

109 ) Pyruvate kinase isozymes M1/M2

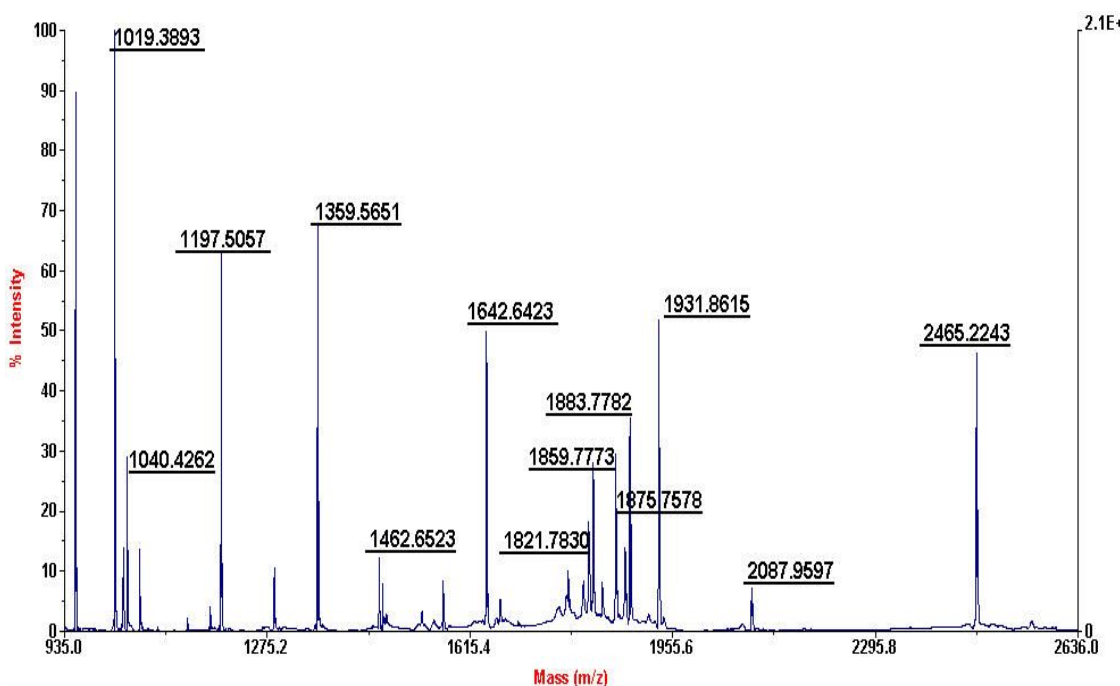

| Start - End | Observed  | Mr(expt)  | Mr(calc)  | Delta   | Miss Sequence                   |
|-------------|-----------|-----------|-----------|---------|---------------------------------|
| 44 - 56     | 1359.5651 | 1358.5579 | 1358.6976 | -0.1397 | 0 R.NTGICTIGPASR.S              |
| 74 - 89     | 1883.7782 | 1882.7709 | 1882.8962 | -0.1252 | 0 R.LNFSHGTHEYHAETIK.N          |
| 93 - 115    | 2465.2243 | 2464.2170 | 2464.2849 | -0.0679 | 0 R.TATESFASDPILYRPVAVALDTK.G   |
| 142 - 151   | 1197.5057 | 1196.4984 | 1196.5747 | -0.0762 | 0 K.ITLDNAYMEK.C                |
| 174 - 186   | 1462.6523 | 1461.6451 | 1461.8078 | -0.1628 | 0 K.IYVDDGLISLQVK.Q             |
| 231 - 246   | 1859.7773 | 1858.7701 | 1858.8923 | -0.1222 | 0 K.FGVEQDVMVFASFIR.K           |
| 231 - 246   | 1875.7578 | 1874.7505 | 1874.8872 | -0.1367 | 0 K.FGVEQDVMVFASFIR.K Oxidation |

(M)

|           |           |           |           |         |                         |
|-----------|-----------|-----------|-----------|---------|-------------------------|
| 248 - 256 | 1040.4262 | 1039.4189 | 1039.5410 | -0.1221 | 1 K.ASDVHEVRK.V         |
| 271 - 278 | 953.3509  | 952.3436  | 952.4726  | -0.1290 | 0 K.IENHEGVR.R          |
| 279 - 294 | 1821.7830 | 1820.7757 | 1820.9090 | -0.1333 | 1 R.RFDEILEASDGIMVAR.G  |
| 368 - 376 | 1019.3893 | 1018.3820 | 1018.5083 | -0.1263 | 0 K.GDYPLEAVR.M         |
| 384 - 399 | 1931.8615 | 1930.8542 | 1930.9788 | -0.1246 | 0 R.EAEAAIYHLQLFEELR.R  |
| 384 - 400 | 2087.9597 | 2086.9524 | 2087.0799 | -0.1275 | 1 R.EAEAAIYHLQLFEELRR.L |
| 476 - 489 | 1642.6423 | 1641.6350 | 1641.7634 | -0.1284 | 0 K.DPVQEAWAEDVDLR.V    |

No match to: 1033.4619, 1061.3772, 1286.5581, 1814.9551

110 ) Peroxiredoxin-1

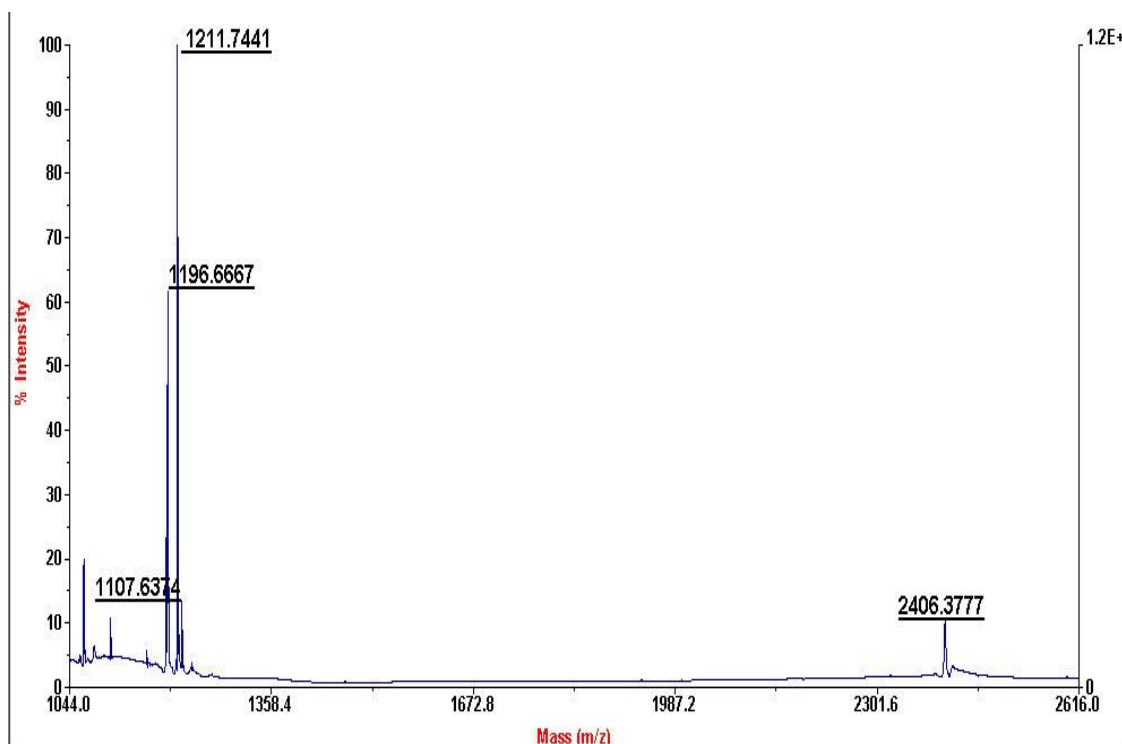

| Start - End | Observed | Mr(expt) | Mr(calc) | Delta | Miss Sequence |
|-------------|----------|----------|----------|-------|---------------|
|-------------|----------|----------|----------|-------|---------------|

|           |           |           |           |        |   |                            |
|-----------|-----------|-----------|-----------|--------|---|----------------------------|
| 8 - 16    | 980.5554  | 979.5481  | 979.5239  | 0.0242 | 0 | K.IGHPAPNFK.A              |
| 111 - 120 | 1107.6374 | 1106.6301 | 1106.5971 | 0.0330 | 0 | R.TIAQDYGVLK.A             |
| 141 - 151 | 1211.7441 | 1210.7368 | 1210.6669 | 0.0699 | 0 | R.QITVNDLPVGR.S            |
| 159 - 168 | 1196.6667 | 1195.6594 | 1195.6237 | 0.0358 | 0 | R.LVQAFQFTDK.H             |
| 169 - 190 | 2406.3777 | 2405.3705 | 2405.1797 | 0.1907 | 0 | K.HGEVCPAGWKPGSDTIKPDVQK.S |

No match to: 909.2417, 1002.5432, 1066.1162, 1194.6845, 1218.6968

111 ) Flavin reductase

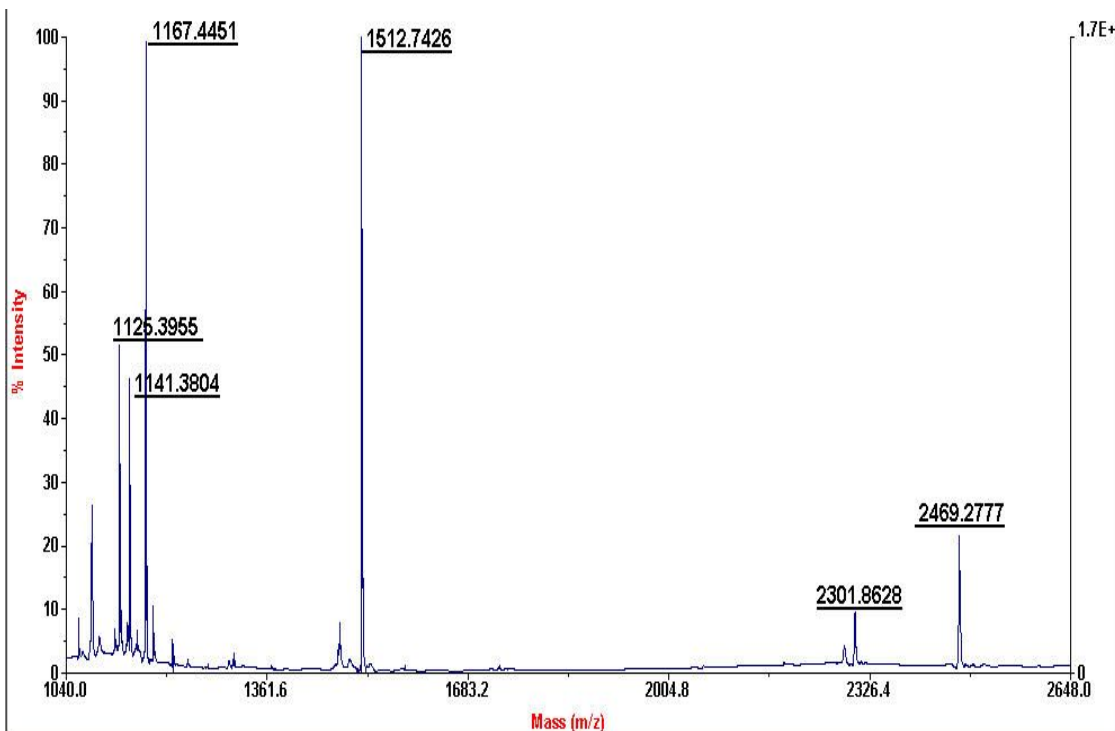

| Start - End                       | Observed  | Mr(expt)  | Mr(calc)  | Delta   | Miss Sequence |                             |
|-----------------------------------|-----------|-----------|-----------|---------|---------------|-----------------------------|
| 40 - 63                           | 2469.2777 | 2468.2704 | 2468.3022 | -0.0318 | 0             |                             |
| <b>R.LPSEGPRPAHVVGDLQAADVDK.T</b> |           |           |           |         |               |                             |
| 64 - 78                           | 1512.7426 | 1511.7353 | 1511.8671 | -0.1318 | 0             | K.TVAGQDAVIVLLGTR.N         |
| 125 - 134                         | 1167.4451 | 1166.4378 | 1166.6044 | -0.1666 | 0             | R.LQAVTDDHIR.M              |
| 179 - 187                         | 1125.3955 | 1124.3883 | 1124.5549 | -0.1666 | 0             | K.HDLGHFMLR.C               |
| 179 - 187                         | 1141.3804 | 1140.3732 | 1140.5498 | -0.1767 | 0             | K.HDLGHFMLR.C Oxidation (M) |
| 188 - 206                         | 2301.8628 | 2300.8556 | 2300.9280 | -0.0725 | 0             | R.CLTTDEYDGHSTYPHQYQ.-      |

No match to: 1080.8350, 1179.4333, 1475.6493

112 ) Peptidyl-prolyl cis-trans isomerase B precursor

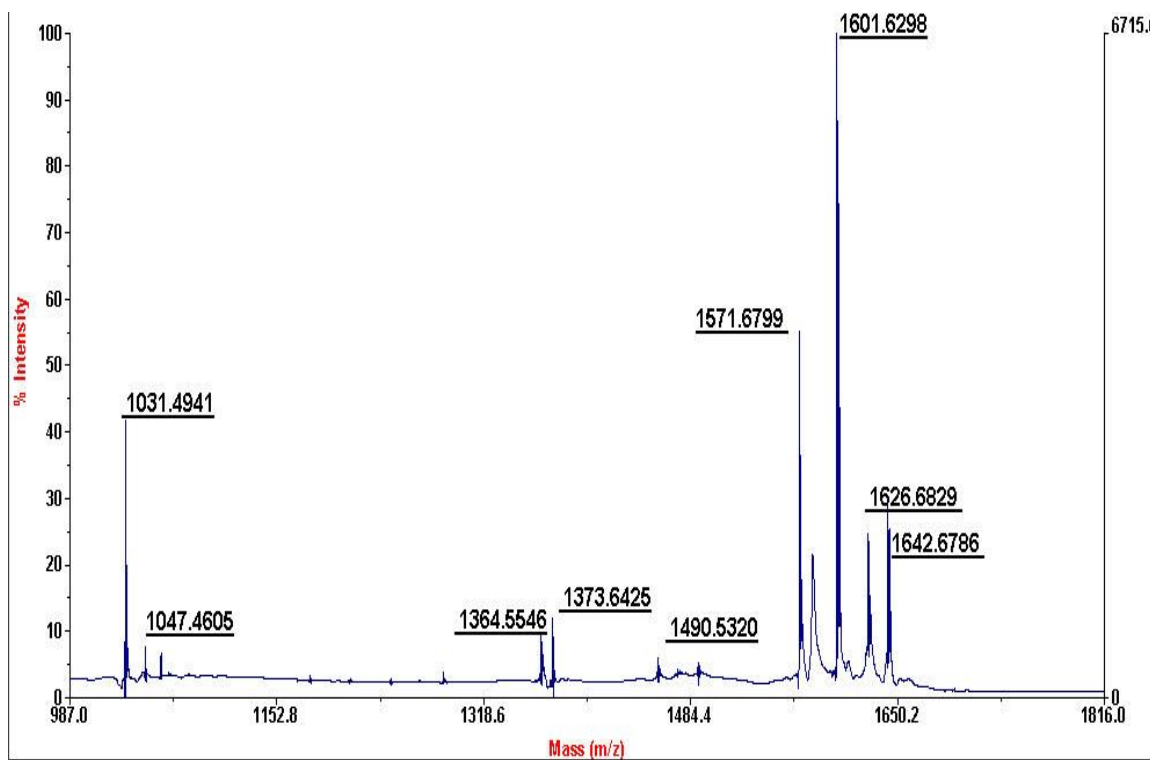

| Start - End | Observed  | Mr(expt)  | Mr(calc)  | Delta   | Miss Sequence                      |
|-------------|-----------|-----------|-----------|---------|------------------------------------|
| 64 - 76     | 1364.5546 | 1363.5473 | 1363.6983 | -0.1510 | 0 K.TVDNFVALATGEK.G                |
| 88 - 101    | 1626.6829 | 1625.6756 | 1625.8235 | -0.1479 | 1 R.VIKDFMIQGGDFTR.G               |
| 88 - 101    | 1642.6786 | 1641.6713 | 1641.8184 | -0.1471 | 1 R.VIKDFMIQGGDFTR.G Oxidation (M) |
| 109 - 121   | 1601.6298 | 1600.6225 | 1600.7521 | -0.1296 | 1 K.SIYGERFPDENFK.L                |
| 124 - 137   | 1490.5320 | 1489.5247 | 1489.6772 | -0.1524 | 0 K.HYGPVWVSMANAGK.D Oxidation (M) |
| 164 - 172   | 1031.4941 | 1030.4868 | 1030.5481 | -0.0612 | 0 K.VLEGMEVVR.K                    |
| 164 - 172   | 1047.4605 | 1046.4532 | 1046.5430 | -0.0898 | 0 K.VLEGMEVVR.K Oxidation (M)      |
| 183 - 196   | 1571.6799 | 1570.6726 | 1570.8388 | -0.1662 | 1 R.DKPLKDVIIADCGK.I               |
| 197 - 208   | 1373.6425 | 1372.6352 | 1372.7601 | -0.1249 | 1 K.IEVEKPFIAIKE.-                 |

113 ) Protein DJ-1



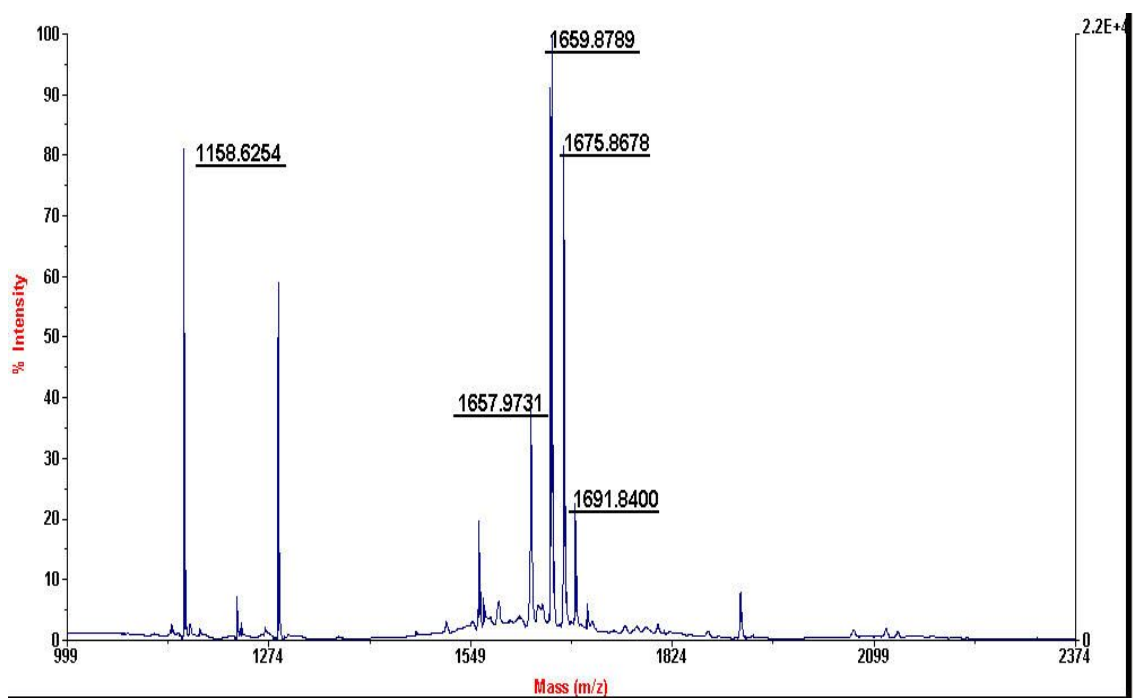

| Start - End | Observed  | Mr(expt)  | Mr(calc)  | Delta  | Miss Sequence                   |
|-------------|-----------|-----------|-----------|--------|---------------------------------|
| 13 - 27     | 1675.8678 | 1674.8605 | 1674.7956 | 0.0649 | 0 K.GAEEMETVIPVDVMR.R           |
| 13 - 27     | 1691.8400 | 1690.8328 | 1690.7905 | 0.0422 | 0 K.GAEEMETVIPVDVMR.R Oxidation |
| (M)         |           |           |           |        |                                 |
| 33 - 48     | 1657.9731 | 1656.9658 | 1656.8617 | 0.1041 | 1 K.VTVAGLAGKDPVQCSR.D          |
| 49 - 63     | 1659.8789 | 1658.8716 | 1658.8185 | 0.0531 | 1 R.DVVICPDASLEDAKK.E           |
| 90 - 98     | 1158.6254 | 1157.6181 | 1157.6040 | 0.0141 | 1 K.EILKEQENR.K                 |

No match to: 1286.7447, 1560.6667, 2584.5953

114 ) Inorganic pyrophosphatase

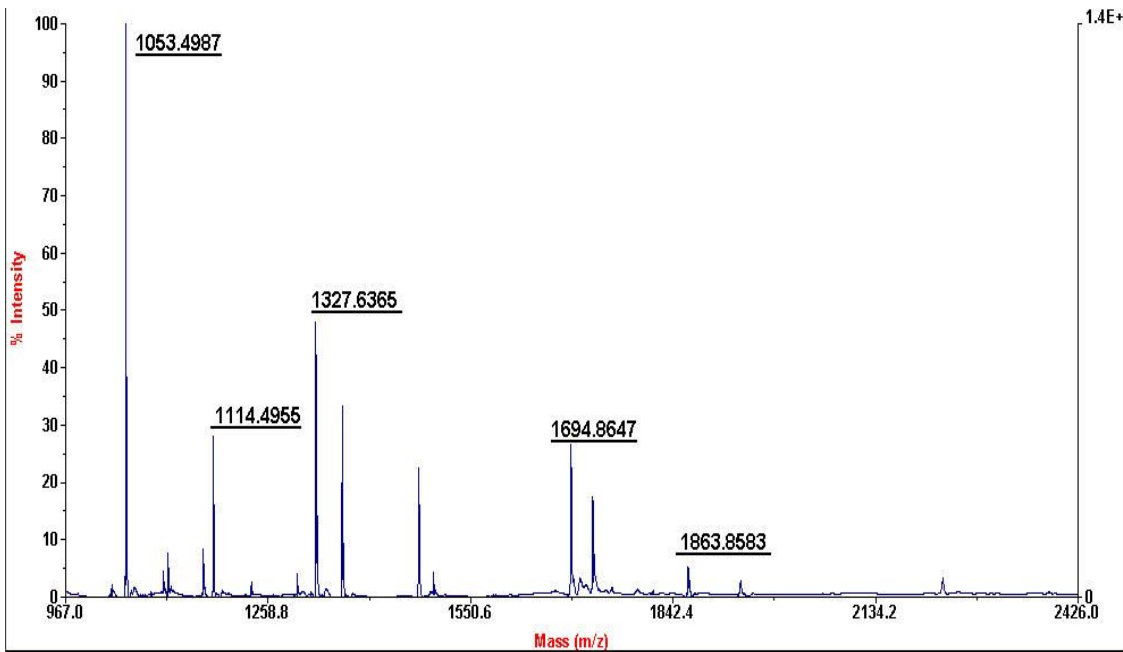

| Start - End | Observed  | Mr(expt)  | Mr(calc)  | Delta   | Miss Sequence          |
|-------------|-----------|-----------|-----------|---------|------------------------|
| 10 - 18     | 1053.4987 | 1052.4914 | 1052.5291 | -0.0377 | 0 R.AAPFSLEYR.V        |
| 26 - 41     | 1863.8583 | 1862.8510 | 1862.9203 | -0.0693 | 0 K.GQYISPFHDIPIYADK.D |
| 42 - 52     | 1327.6365 | 1326.6292 | 1326.6754 | -0.0462 | 0 K.DVFHMVVEVPR.W      |
| 80 - 88     | 1114.4955 | 1113.4882 | 1113.5858 | -0.0976 | 0 R.YVANLFPYK.G        |
| 178 - 191   | 1694.8647 | 1693.8574 | 1693.8827 | -0.0253 | 0 R.LKPGYLEATVDWFR.R   |

No match to: 1165.5504, 1365.5973, 1726.8564

115 ) Ig gamma-1 chain C region

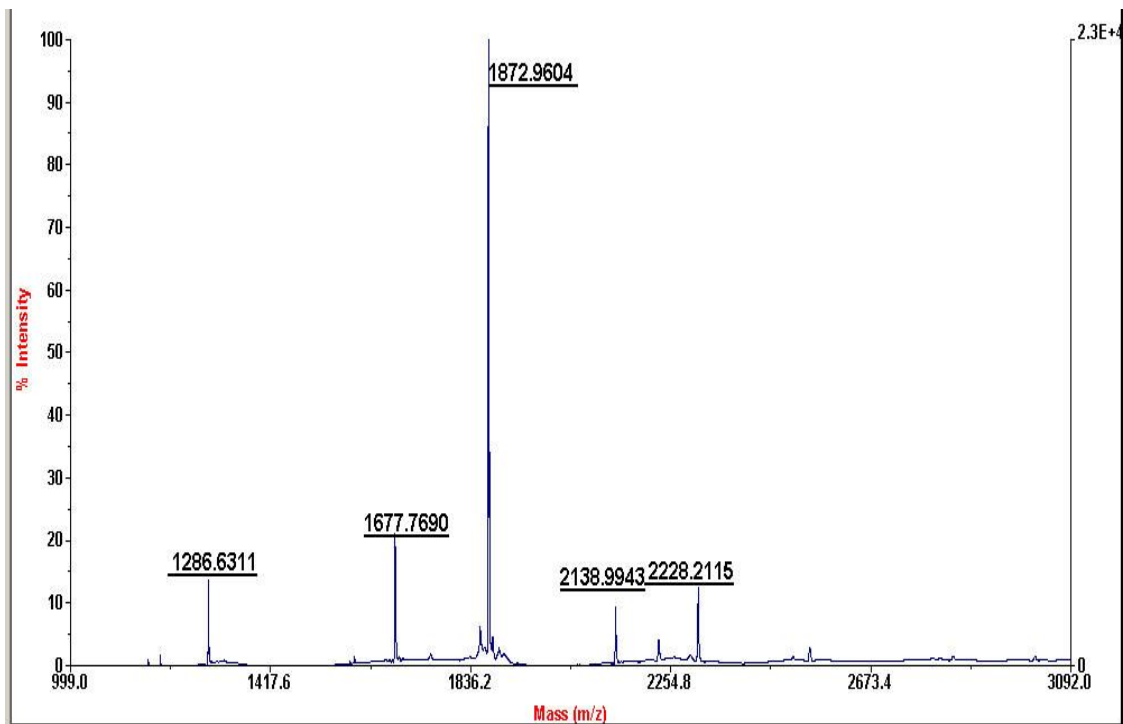

| Start - End | Observed  | Mr(expt)  | Mr(calc)  | Delta   | Miss Sequence             |
|-------------|-----------|-----------|-----------|---------|---------------------------|
| 139 - 157   | 2138.9943 | 2137.9870 | 2138.0201 | -0.0331 | 0 R.TPEVTCVVVDVSHEDPEVK.F |
| 158 - 171   | 1677.7690 | 1676.7618 | 1676.7946 | -0.0329 | 0 K.FNWFYVDGVEVHNAK.T     |
| 185 - 203   | 2228.2115 | 2227.2043 | 2227.2000 | 0.0042  | 1 R.VVSVLTVLHQDWLNGKEYK.C |
| 228 - 238   | 1286.6311 | 1285.6238 | 1285.6666 | -0.0428 | 0 R.EPQVYTLPPSR.D         |
| 228 - 243   | 1872.9604 | 1871.9531 | 1871.9629 | -0.0097 | 1 R.EPQVYTLPPSRDELTK.N    |

No match to: 970.5473, 1287.6306, 1854.9541, 2311.1819, 2545.1070

116) Fibrillin-1 precursor - Homo sapiens (Human)

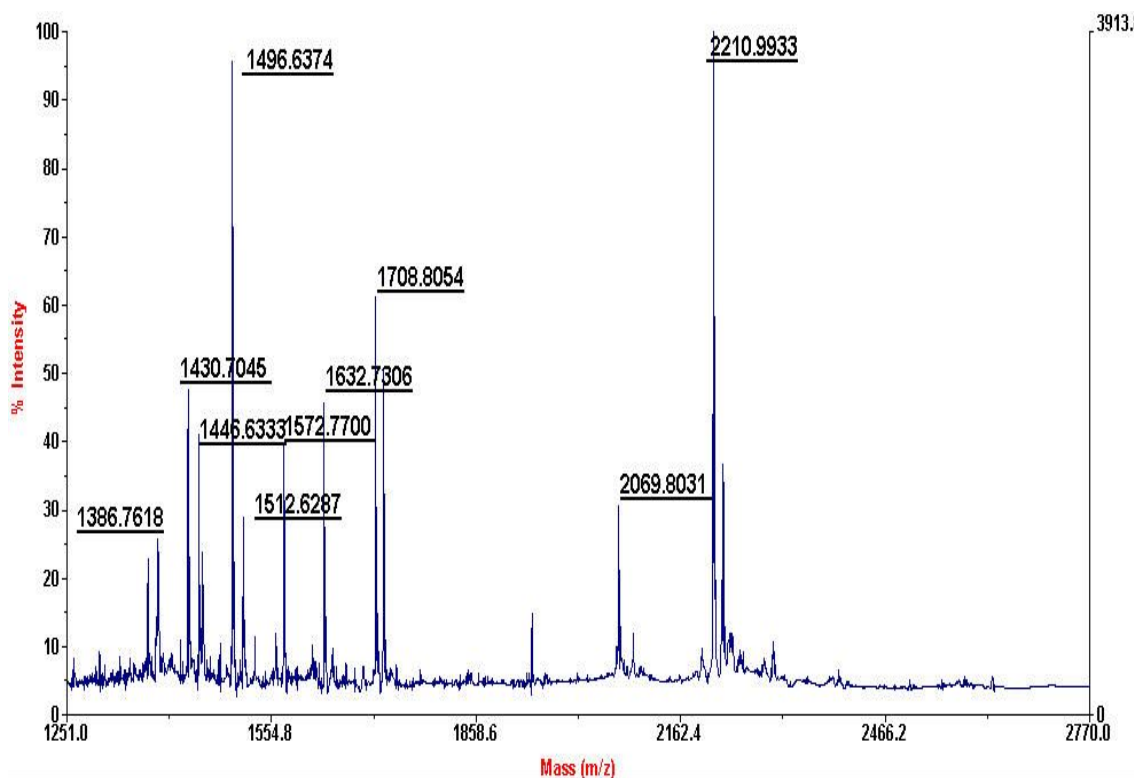

| Start - End | Observed  | Mr(expt)  | Mr(calc)  | Delta  | Miss Sequence                    |
|-------------|-----------|-----------|-----------|--------|----------------------------------|
| 526 - 539   | 1708.8054 | 1707.7981 | 1707.7305 | 0.0677 | 1 R.TECRDIDECLQNGR.I             |
| 935 - 948   | 1512.6287 | 1511.6214 | 1511.6167 | 0.0047 | 0 K.CQCPSGMTLDATGR.I ; Oxidation |
| (M)         |           |           |           |        |                                  |
| 1301 - 1315 | 1632.7306 | 1631.7233 | 1631.6895 | 0.0338 | 1 K.GSFICHCDMGYSGKK.G            |
| 1429 - 1442 | 1572.7700 | 1571.7627 | 1571.6055 | 0.1573 | 0 R.CECDMGFVPSADGK.A 2           |

|             |           |           |           |         |   |                                |
|-------------|-----------|-----------|-----------|---------|---|--------------------------------|
| 1470 - 1480 | 1386.7618 | 1385.7545 | 1385.5591 | 0.1954  | 0 | R.CECEIGYELDR.S                |
| 2053 - 2064 | 1496.6374 | 1495.6302 | 1495.6258 | 0.0044  | 1 | R.CQDLRMSYCYAK.F Oxidation (M) |
| 2221 - 2239 | 2210.9933 | 2209.9860 | 2209.9959 | -0.0098 | 1 | R.CVNTYGSYECKCPVGYVLR.E        |
| 2461 - 2472 | 1430.7045 | 1429.6972 | 1429.5602 | 0.1370  | 0 | K.NTEGSYQCSCP.K 2              |
| 2493 - 2510 | 2069.8031 | 2068.7958 | 2068.9281 | -0.1323 | 0 | K.QHNCQFLCVNTIGGFTCK.C         |
| 2681 - 2694 | 1446.6333 | 1445.6260 | 1445.6326 | -0.0066 | 0 | R.IGQGHCVSGMGMGR.G             |

117) BTB/POZ domain-containing protein 6

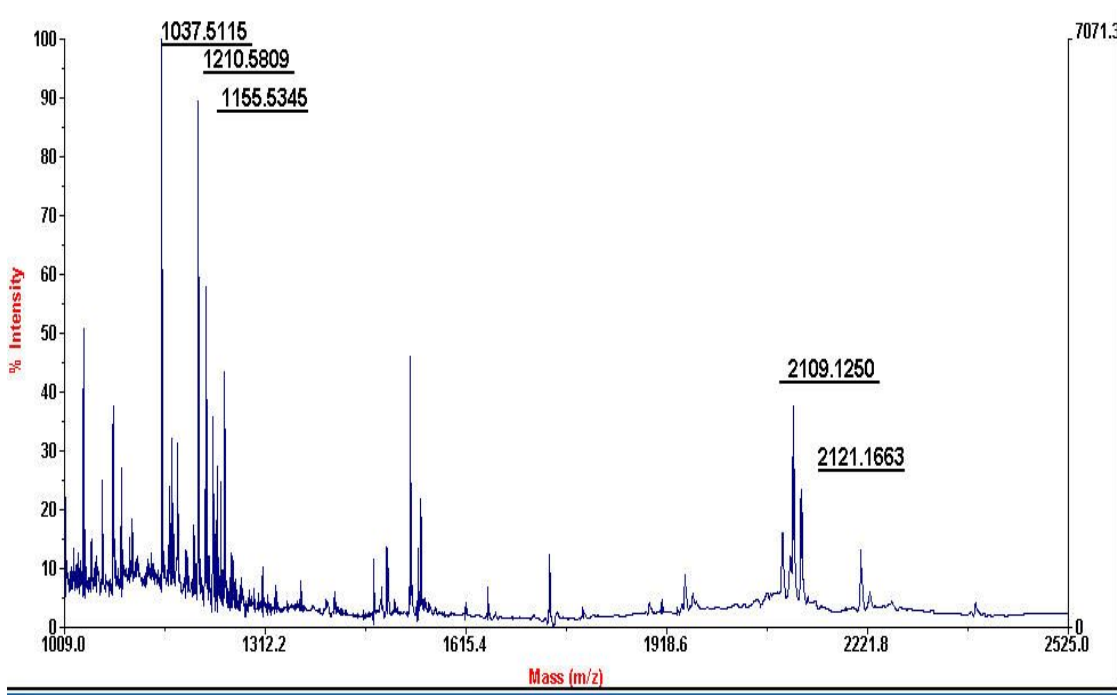

| Start - End | Observed  | Mr(expt)  | Mr(calc)  | Delta   | Miss Sequence            |
|-------------|-----------|-----------|-----------|---------|--------------------------|
| 146 - 163   | 2109.1250 | 2108.1177 | 2108.0572 | 0.0605  | 1 R.SEGFCEIDRQTLEIIVTR.E |
| 170 - 187   | 2121.1663 | 2120.1590 | 2120.0360 | 0.1230  | 1 K.EAVVFEAVLNWAEAECKR.Q |
| 257 - 265   | 1037.5115 | 1036.5042 | 1036.5349 | -0.0306 | 1 K.GLAPQRCHR.F          |
| 282 - 291   | 1210.5809 | 1209.5736 | 1209.5448 | 0.0288  | 0 R.CDSIQFAVDR.R         |
| 319 - 329   | 1155.5345 | 1154.5272 | 1154.7023 | -0.1751 | 0 R.LGVVLAQNLTK.F        |

118) Anterior gradient protein 2

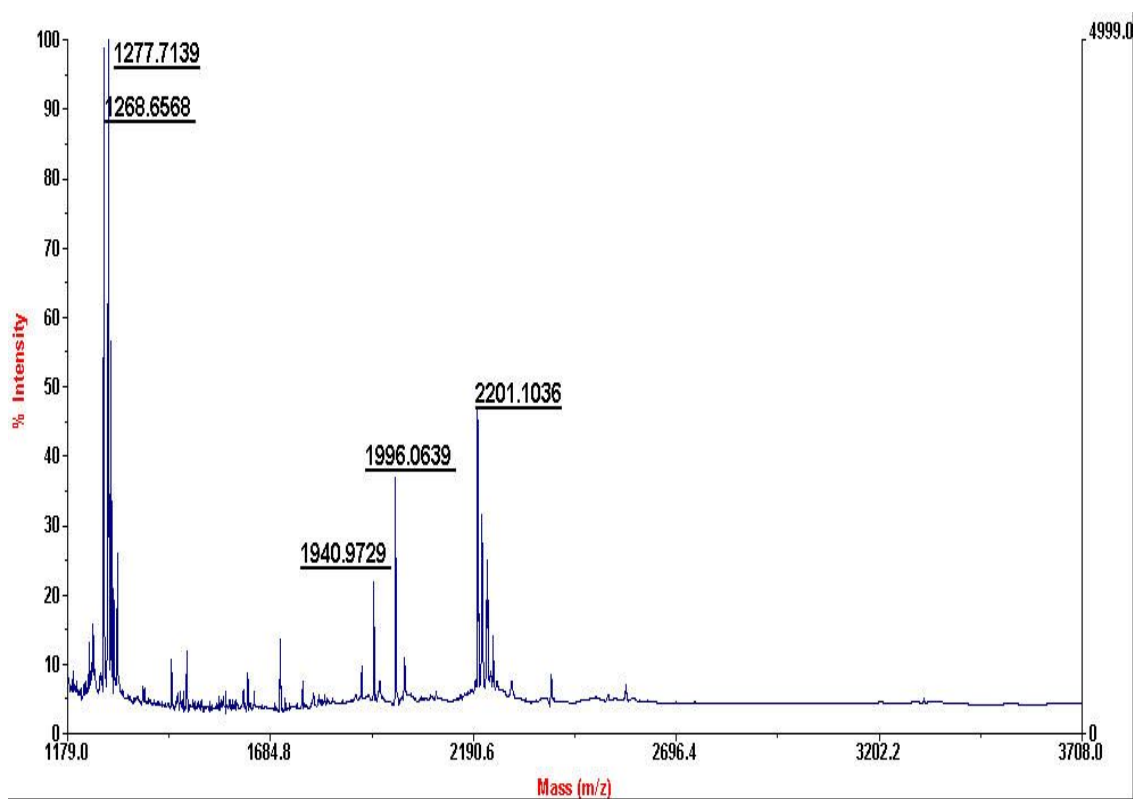

| Start - End | Observed  | Mr(expt)  | Mr(calc)  | Delta  | Miss Sequence            |
|-------------|-----------|-----------|-----------|--------|--------------------------|
| 47 - 64     | 2201.1036 | 2200.0963 | 2200.0477 | 0.0487 | 0 R.GWGDQLIWTQTYEEALYK.S |
| 100 - 116   | 1996.0639 | 1995.0566 | 1995.0564 | 0.0001 | 0 K.LAEQFVLLNLVYETTDK.H  |
| 117 - 127   | 1268.6568 | 1267.6495 | 1267.6309 | 0.0186 | 0 K.HLSPDGQYVPR.I        |
| 128 - 138   | 1277.7139 | 1276.7067 | 1276.6850 | 0.0217 | 0 R.IMFVDPSLTVR.A        |
| 149 - 165   | 1940.9729 | 1939.9656 | 1939.9601 | 0.0056 | 0 R.LYAYEPADTALLLDNMK.K  |

119) Pyridoxal kinase

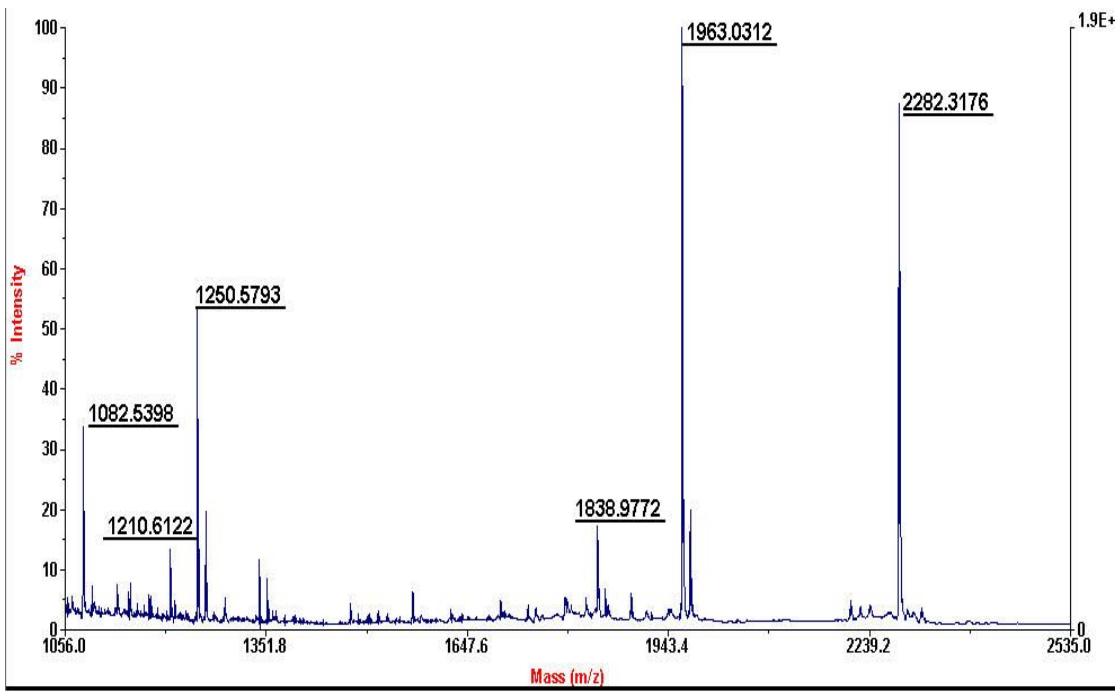

| Start - End | Observed  | Mr(expt)  | Mr(calc)  | Delta   | Miss Sequence              |
|-------------|-----------|-----------|-----------|---------|----------------------------|
| 54 - 70     | 1963.0312 | 1962.0240 | 1961.9694 | 0.0546  | 0 K.GQVLNSDELQELYEGLR.L    |
| 77 - 86     | 1250.5793 | 1249.5721 | 1249.5979 | -0.0258 | 0 K.YDYVLTGYTR.D           |
| 140 - 160   | 2282.3176 | 2281.3103 | 2281.2318 | 0.0785  | 0 K.VVPLADIITPNQFEALLSGR.K |
| 161 - 170   | 1210.6122 | 1209.6050 | 1209.6465 | -0.0416 | 1 R.KIHSQEEALR.V           |
| 162 - 170   | 1082.5398 | 1081.5325 | 1081.5516 | -0.0191 | 0 K.IHSQEEALR.V            |
| 276 - 292   | 1838.9772 | 1837.9699 | 1837.9468 | 0.0231  | 0 K.AQAGEGVRPSPMQLELR.M    |

120) RhoGEF and PH domain-containing protein 2

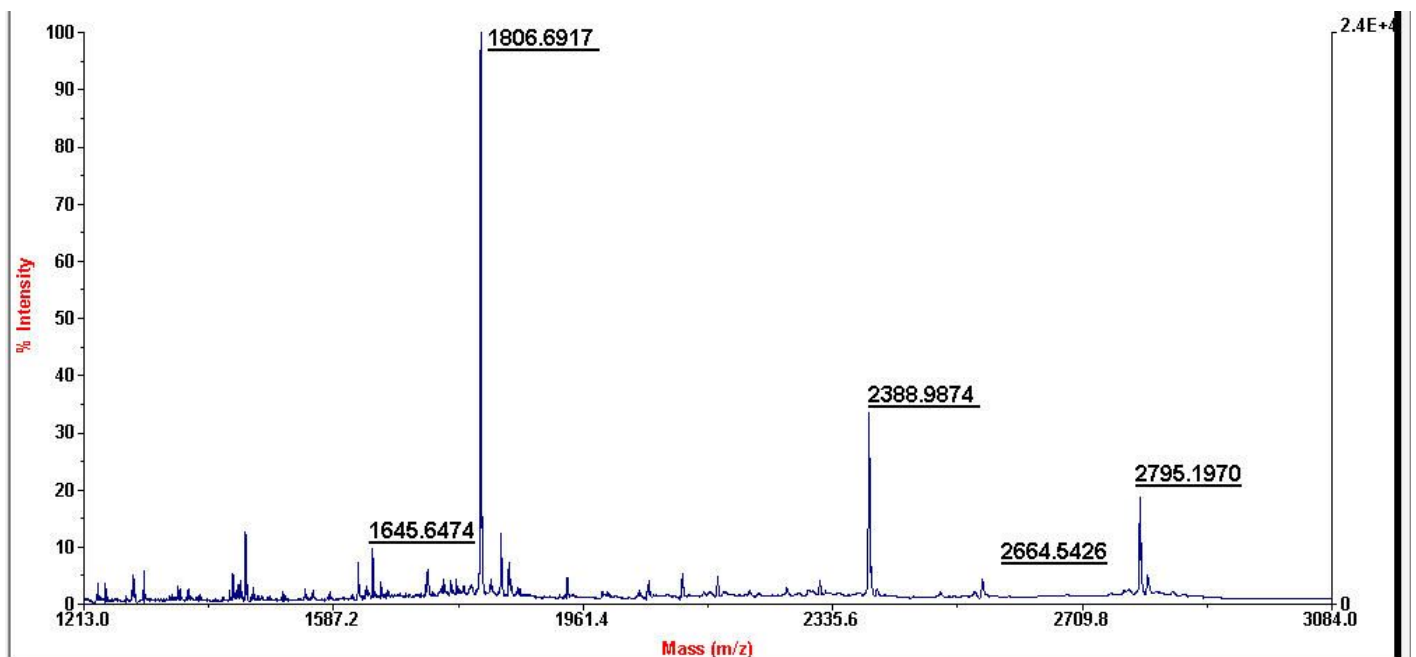

| Start - End | Observed  | Mr(expt)  | Mr(calc)  | Delta   | Miss Sequence                |
|-------------|-----------|-----------|-----------|---------|------------------------------|
| 206 - 226   | 2388.9874 | 2387.9801 | 2388.2689 | -0.2888 | 1 R.AAELLATWTDKSPLFQEVLT.R.I |
| 334 - 354   | 2664.5426 | 2663.5353 | 2663.2698 | 0.2655  | 1 R.NDPMERYLFLFNMLLYCVPR.V   |

Oxidation (M)

|           |           |           |           |         |                        |
|-----------|-----------|-----------|-----------|---------|------------------------|
| 377 - 392 | 1806.6917 | 1805.6844 | 1805.8658 | -0.1814 | 0 R.ELMDAEFPHSFLVSGK.Q |
| 479 - 491 | 1645.6474 | 1644.6401 | 1644.7184 | -0.0783 | 1 R.HHCRACGYVVCAR.C 3  |
| 532 - 557 | 2795.1970 | 2794.1898 | 2794.3881 | -0.1983 | 1                      |

R.GILEKGSSATPDQSLMCSFLQLIGDK.W

No match to: 1454.5853

121) Cytosolic nonspecific dipeptidase

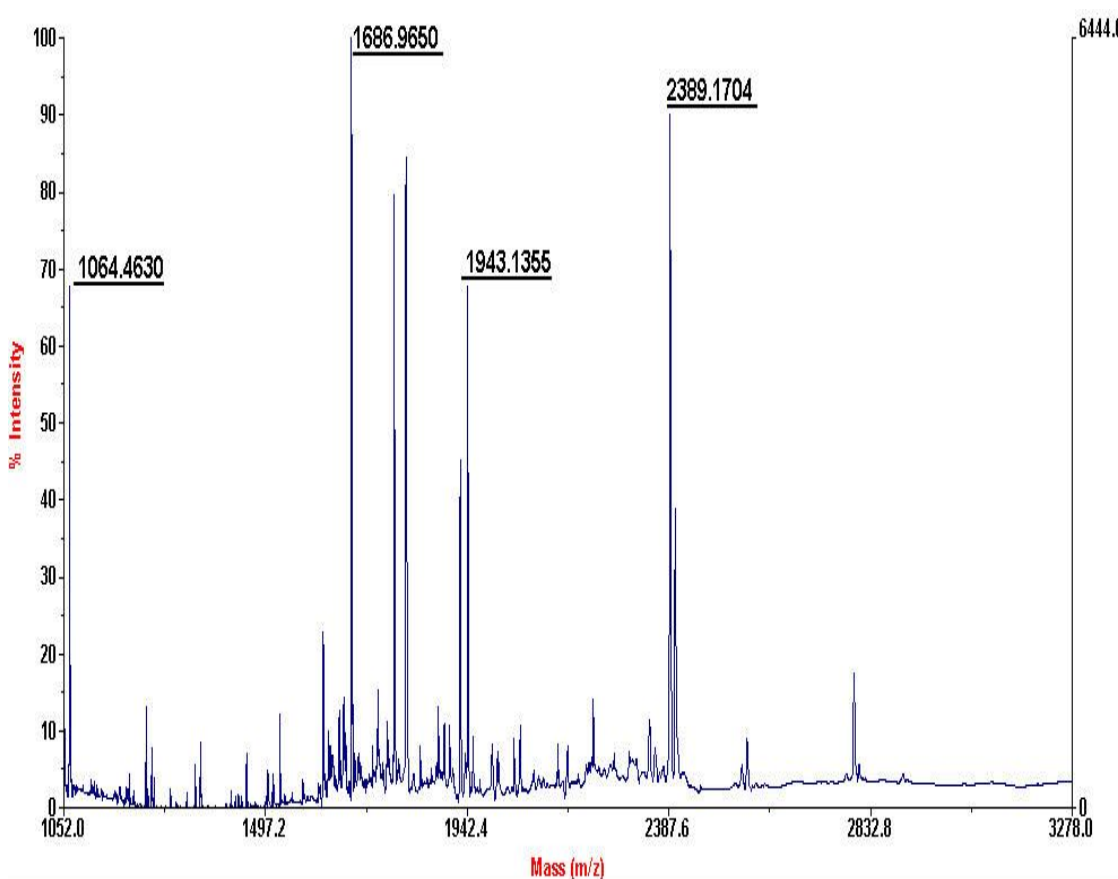

| Start - End | Observed  | Mr(expt)  | Mr(calc)  | Delta   | Miss Sequence     |
|-------------|-----------|-----------|-----------|---------|-------------------|
| 44 - 53     | 1064.4630 | 1063.4557 | 1063.5042 | -0.0485 | 0 R.MMEVAAADV.K.Q |

|           |           |           |           |         |   |                           |
|-----------|-----------|-----------|-----------|---------|---|---------------------------|
| 67 - 84   | 1943.1355 | 1942.1282 | 1942.1251 | 0.0031  | 1 | K.QKLPDGSEIPLPILLGR.L     |
| 69 - 84   | 1686.9650 | 1685.9577 | 1685.9716 | -0.0138 | 0 | K.LPDGSEIPLPILLGR.L       |
| 160 - 180 | 2389.1704 | 2388.1631 | 2388.0613 | 0.1017  | 0 | R.FCLEGMEESGSEGLDELIFAR.K |

122) Plexin-A4 precursor

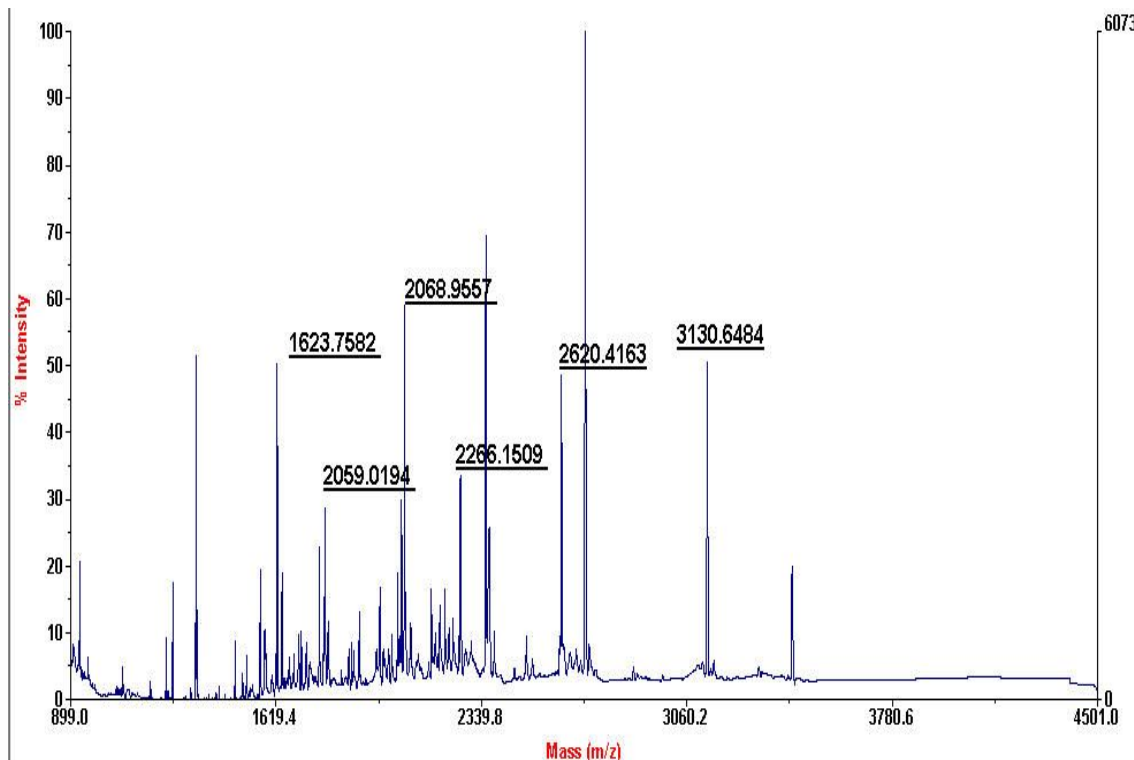

| Start - End | Observed  | Mr(expt)  | Mr(calc)  | Delta   | Miss Sequence                 |
|-------------|-----------|-----------|-----------|---------|-------------------------------|
| 286 - 308   | 2620.4163 | 2619.4090 | 2619.1911 | 0.2179  | 1 K.EDTAFNSYVEVPIGCERSGVEYR.L |
| 623 - 640   | 2059.0194 | 2058.0122 | 2058.1222 | -0.1100 | 1 R.IITENGDDHHVVQLQLKSK.E     |
| 945 - 963   | 2266.1509 | 2265.1436 | 2265.1351 | 0.0085  | 0 R.SSQLYYFMTLTLSDLKPSR.G     |

Oxidation (M)

|             |           |           |           |         |                            |
|-------------|-----------|-----------|-----------|---------|----------------------------|
| 1499 - 1518 | 2068.9557 | 2067.9484 | 2068.0511 | -0.1026 | 0 K.TLVLSCVSPDNANSPEVPVK.I |
| 1601 - 1615 | 1623.7582 | 1622.7509 | 1622.8012 | -0.0503 | 0 K.QVTAYNAVNNSTVSR.T      |
| 1764 - 1788 | 2702.3293 | 2701.3220 | 2701.1782 | 0.1438  | 0                          |

K.NSITDACLSVVAQTFMDCSTSEHR.L

|             |           |           |           |        |   |
|-------------|-----------|-----------|-----------|--------|---|
| 1764 - 1791 | 3130.6484 | 3129.6411 | 3129.4165 | 0.2246 | 1 |
|-------------|-----------|-----------|-----------|--------|---|

K.NSITDACLSVVAQTFMDCSTSEHRLGK.D

123) NA-dependent protein kinase catalytic subunit



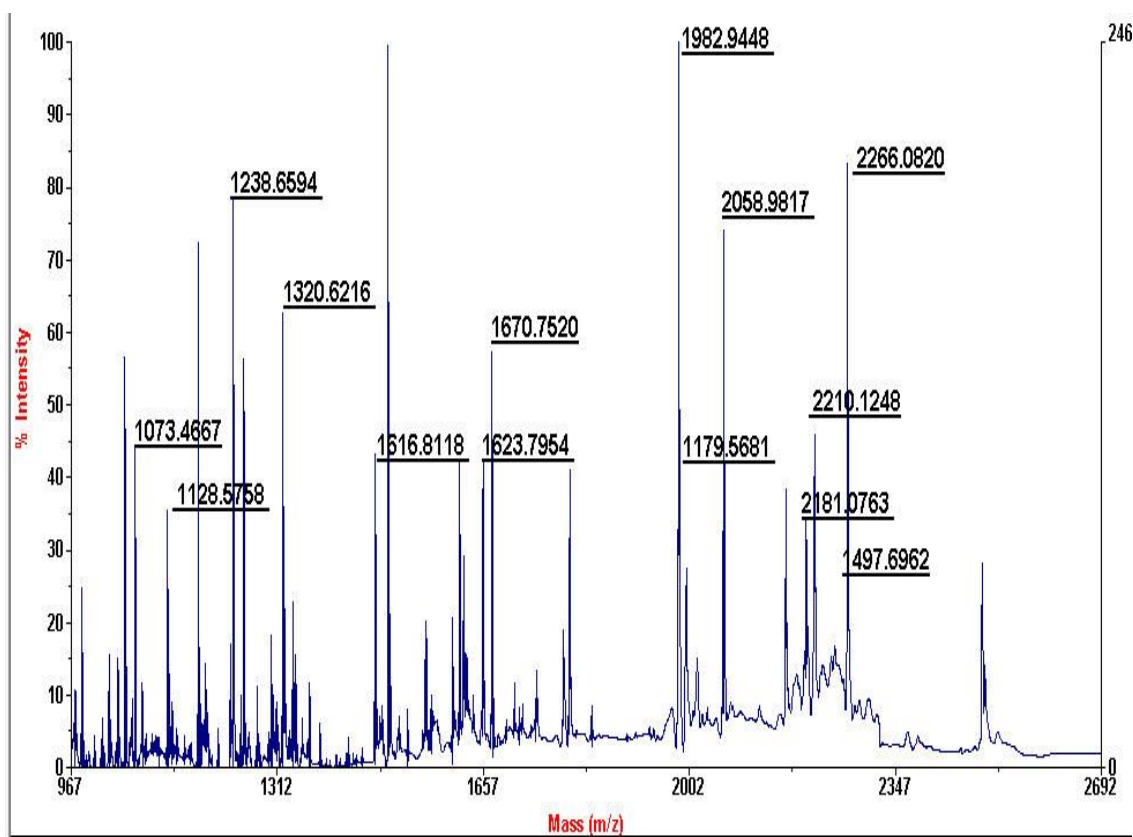

| Start - End | Observed  | Mr(expt)  | Mr(calc)  | Delta   | Miss Sequence                  |
|-------------|-----------|-----------|-----------|---------|--------------------------------|
| 109 - 117   | 1073.4667 | 1072.4594 | 1072.4859 | -0.0265 | 0 K.NTCTSVYTK.D                |
| 140 - 148   | 1128.5758 | 1127.5685 | 1127.5281 | 0.0404  | 1 R.SSRLMDEFK.I Oxidation (M)  |
| 237 - 246   | 1179.5681 | 1178.5609 | 1178.4874 | 0.0735  | 0 K.SMEEDPQTSR.E               |
| 747 - 757   | 1238.6594 | 1237.6522 | 1237.6529 | -0.0007 | 0 R.AYVPALQMAFK.L              |
| 1153 - 1170 | 1982.9448 | 1981.9375 | 1982.1023 | -0.1647 | 1 R.LPRGFPPSASLCLLDLVK.W       |
| 1156 - 1170 | 1616.8118 | 1615.8045 | 1615.8644 | -0.0599 | 0 R.GFPPSASLCLLDLVK.W          |
| 1490 - 1508 | 2058.9817 | 2057.9744 | 2057.9874 | -0.0130 | 1 K.GIAPGDERQCLPSLDLCK.Q       |
| 1498 - 1508 | 1320.6216 | 1319.6143 | 1319.6214 | -0.0071 | 0 R.QCLPSLDLCK.Q 2             |
| 1871 - 1883 | 1670.7520 | 1669.7447 | 1669.7844 | -0.0397 | 1 K.MGYKILDVMYSR.L 2 Oxidation |
| (M)         |           |           |           |         |                                |
| 2215 - 2227 | 1623.7954 | 1622.7881 | 1622.9119 | -0.1238 | 1 R.LLNFLMKHVHFK.R             |
| 2314 - 2333 | 2266.0820 | 2265.0747 | 2265.2191 | -0.1443 | 1 K.EVYAAAAEVLGLILRYVMER.K     |
| 2370 - 2388 | 2210.1248 | 2209.1175 | 2209.1758 | -0.0583 | 1 K.SFPPLADRFMNAVFFLLPK.F      |
| 2765 - 2776 | 1497.6962 | 1496.6890 | 1496.7736 | -0.0846 | 1 K.QDAQVVLRSYR.H              |
| 3218 - 3235 | 2181.0763 | 2180.0690 | 2180.0089 | 0.0602  | 1 R.MEVQEEDISLIRCK.F           |

No match to: 1655.7507, 2015.2068

124) Uncharacterized protein C6orf152

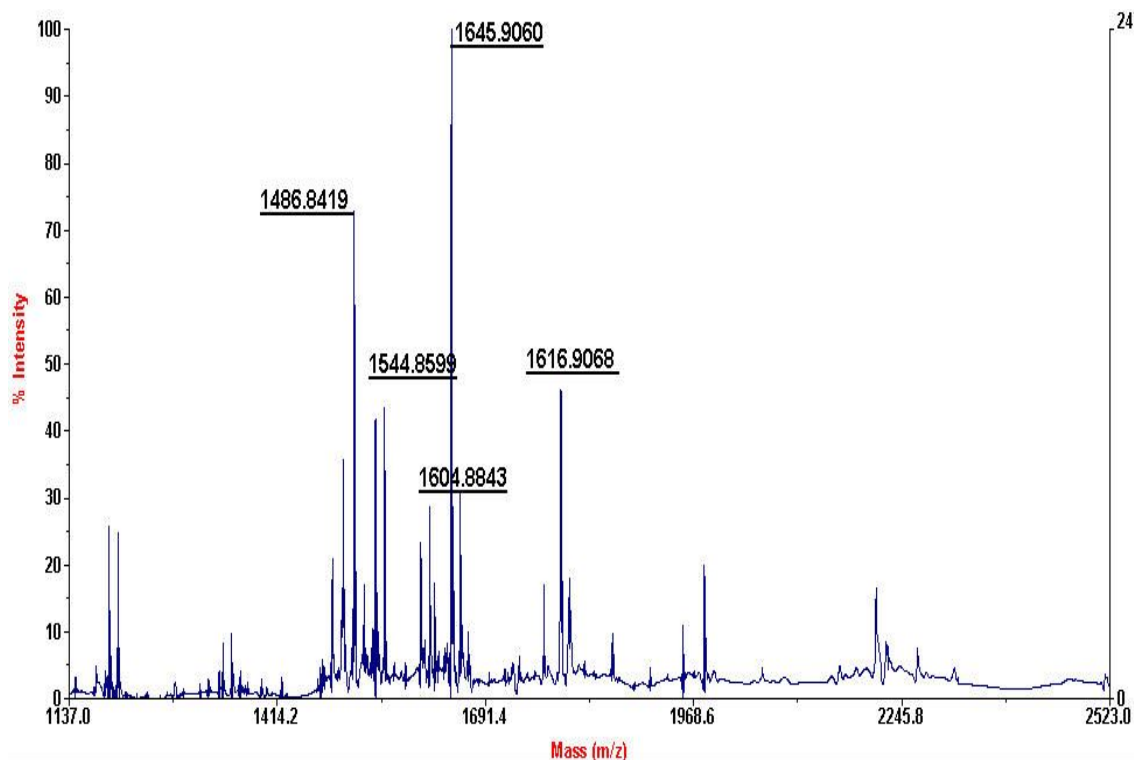

| Start - End | Observed  | Mr(expt)  | Mr(calc)  | Delta  | Miss Sequence                     |
|-------------|-----------|-----------|-----------|--------|-----------------------------------|
| 53 - 66     | 1616.9068 | 1615.8995 | 1615.7928 | 0.1068 | 1 K.RQTSDGQVHHQAPR.K              |
| 264 - 276   | 1544.8599 | 1543.8526 | 1543.7630 | 0.0895 | 1 R.AYEAHDENKVLQK.E               |
| 318 - 331   | 1486.8419 | 1485.8347 | 1485.6228 | 0.2119 | 0 K.NAACQSDFADLCTK.G              |
| 574 - 586   | 1604.8843 | 1603.8770 | 1603.7300 | 0.1470 | 1 K.SSFLDFQRNSMEK.L Oxidation (M) |
| 683 - 697   | 1645.9060 | 1644.8987 | 1644.7842 | 0.1145 | 0 K.AADSVEDIIEEVALR.-             |

125) SH3 domain-binding protein 2

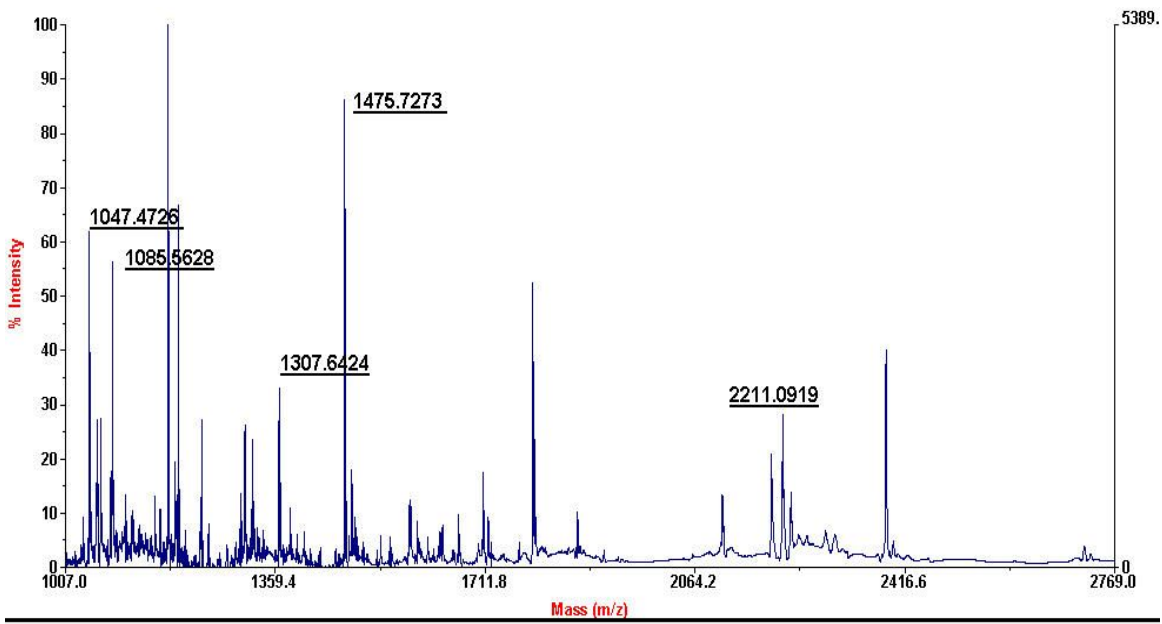

| Start - End   | Observed  | Mr(expt)  | Mr(calc)  | Delta   | Miss Sequence              |
|---------------|-----------|-----------|-----------|---------|----------------------------|
| 36 - 45       | 1085.5628 | 1084.5556 | 1084.6604 | -0.1049 | 1 K.KGGTQLQLLK.W           |
| 107 - 118     | 1475.7273 | 1474.7201 | 1474.6365 | 0.0836  | 0 R.TWFFSASSEER.K          |
| 194 - 213     | 2211.0919 | 2210.0846 | 2210.1194 | -0.0348 | 0 R.LEDALMHPPAYPPPPVPTPR.K |
| Oxidation (M) |           |           |           |         |                            |
| 478 - 488     | 1307.6424 | 1306.6351 | 1306.5976 | 0.0375  | 0 R.GEPQDGLYCIR.N          |
| 553 - 561     | 1047.4726 | 1046.4654 | 1046.4934 | -0.0280 | 0 R.HPYGYTGPR.-            |

No match to: 1196.5100, 1365.6444

126 IQ motif and Sec7 domain-containing protein 1

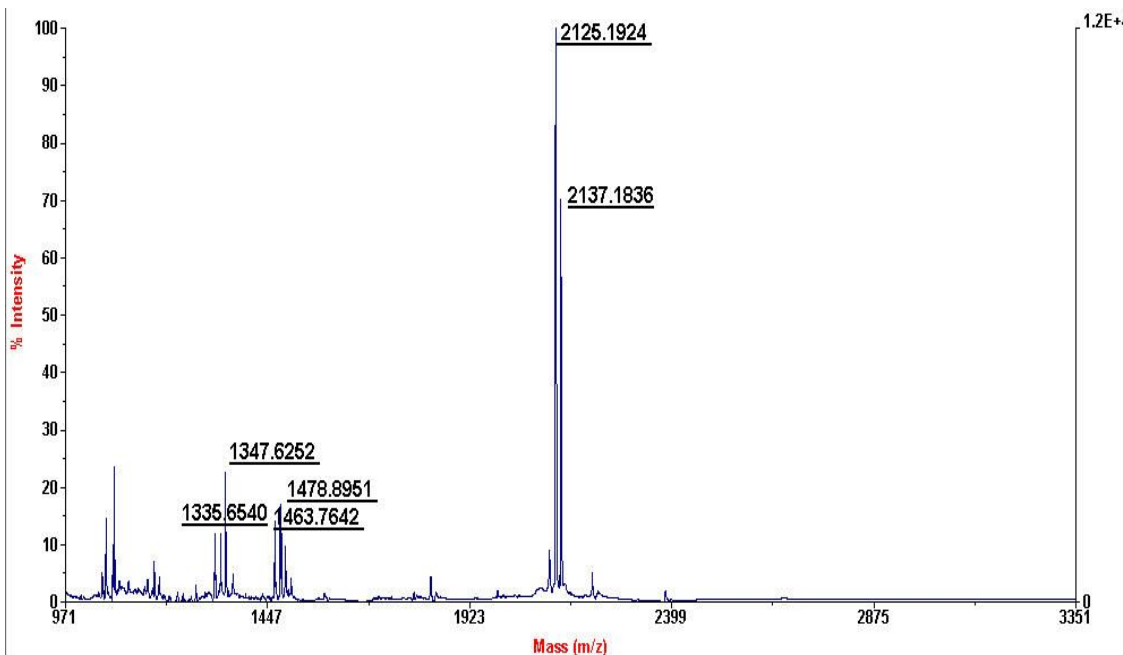

| Start - End | Observed  | Mr(expt)  | Mr(calc)  | Delta   | Miss Sequence              |
|-------------|-----------|-----------|-----------|---------|----------------------------|
| 1 - 10      | 1335.6540 | 1334.6467 | 1334.5318 | 0.1149  | 0 -.MWCLHCNSER.T           |
| 249 - 261   | 1463.7642 | 1462.7569 | 1462.6722 | 0.0847  | 0 K.SLAESIDDALNCR.S        |
| 624 - 634   | 1347.6252 | 1346.6179 | 1346.7306 | -0.1127 | 1 K.VERLIEAFSQR.Y          |
| 627 - 644   | 2125.1924 | 2124.1851 | 2124.0608 | 0.1242  | 1 R.LIEAFSQRYSICNPGVVR.Q   |
| 733 - 752   | 2137.1836 | 2136.1763 | 2136.2102 | -0.0339 | 1 K.KPIGSLHPGLGCVLSLPHRR.L |
| 881 - 894   | 1478.8951 | 1477.8878 | 1477.7381 | 0.1497  | 0 K.GVVRPSMSQCSSLK.K       |

No match to: 1085.6798, 1487.7754, 2086.9407

127) Chorionic somatomammotropin hormone-like 1

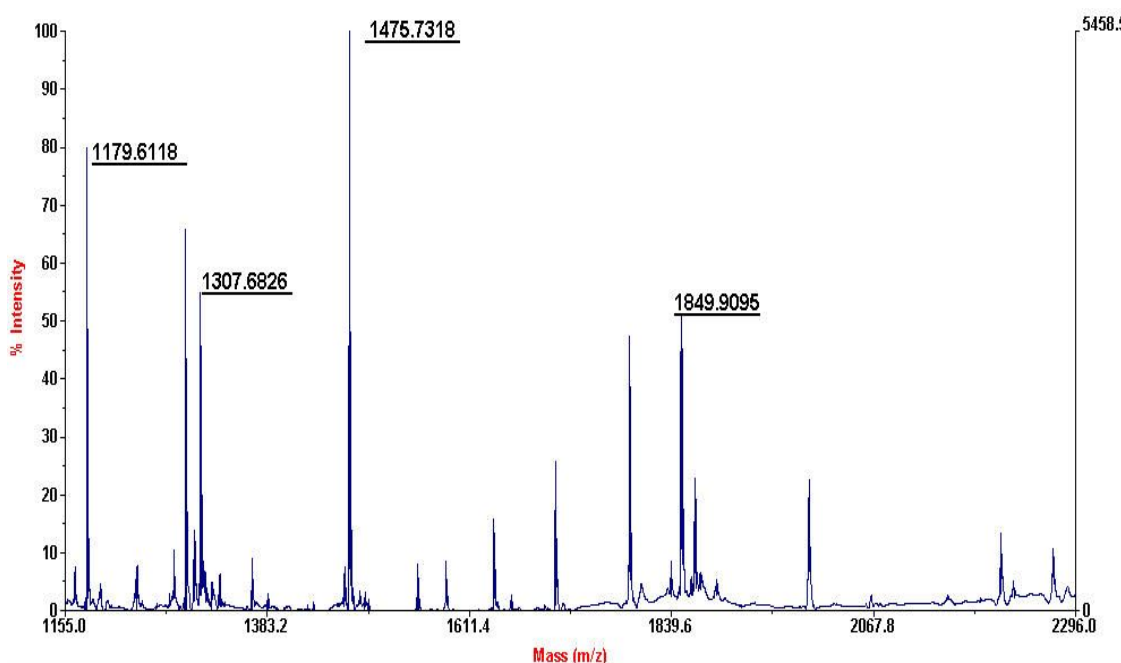

| Start - End | Observed  | Mr(expt)  | Mr(calc)  | Delta   | Miss Sequence                       |
|-------------|-----------|-----------|-----------|---------|-------------------------------------|
| 79 - 94     | 1849.9095 | 1848.9022 | 1849.0672 | -0.1651 | 0 K.SNLELLHISLLLIESR.L              |
| 167 - 175   | 1179.6118 | 1178.6045 | 1178.5655 | 0.0390  | 0 K.NYGLLHCFR.K                     |
| 167 - 176   | 1307.6826 | 1306.6753 | 1306.6604 | 0.0148  | 1 K.NYGLLHCFRK.D                    |
| 187 - 199   | 1475.7318 | 1474.7246 | 1474.6003 | 0.1242  | 1 R.MVQCRSVEGSCGF.- ; Oxidation (M) |

No match to: 1290.6699

128 Tektin-4

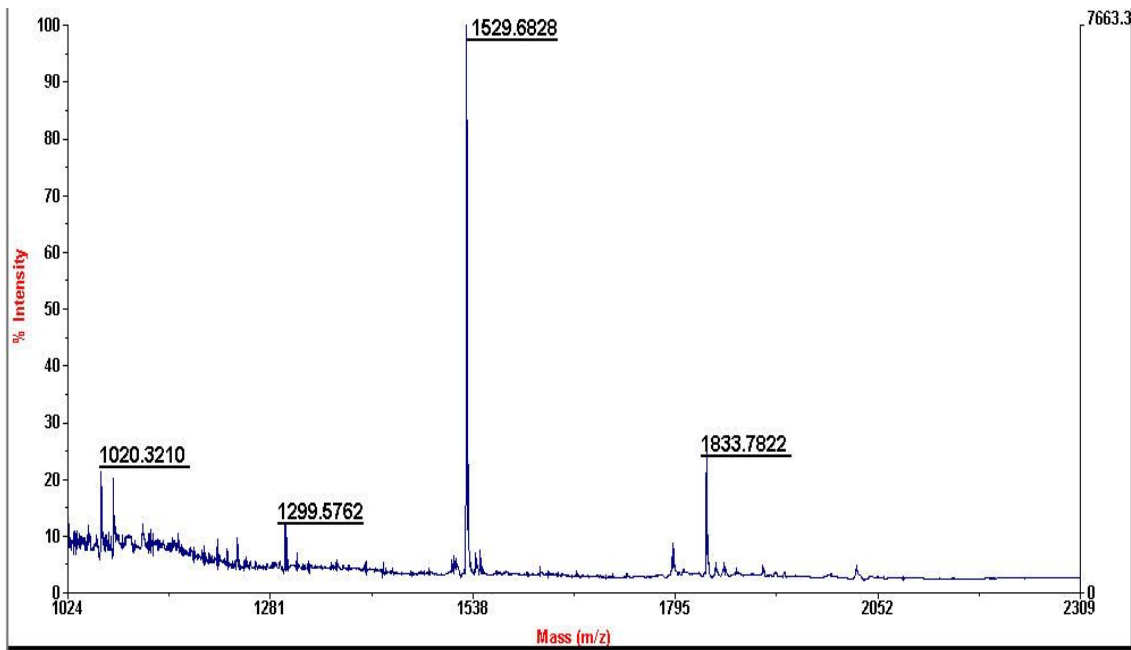

| Start - End | Observed  | Mr(expt)  | Mr(calc)  | Delta   | Miss Sequence                    |
|-------------|-----------|-----------|-----------|---------|----------------------------------|
| 150 - 157   | 1020.3210 | 1019.3137 | 1019.5624 | -0.2487 | 1 R.REHPNLVR.D                   |
| 181 - 193   | 1529.6828 | 1528.6755 | 1528.8508 | -0.1752 | 1 R.TIMQAVSQIRLN.R.E             |
| 349 - 358   | 1299.5762 | 1298.5690 | 1298.5972 | -0.0282 | 0 R.SHRPNMELCR.D                 |
| 365 - 380   | 1833.7822 | 1832.7749 | 1832.9553 | -0.1804 | 0 R.LLSEVEELNMSLTALR.E Oxidation |

128) Krueppel-like factor 5

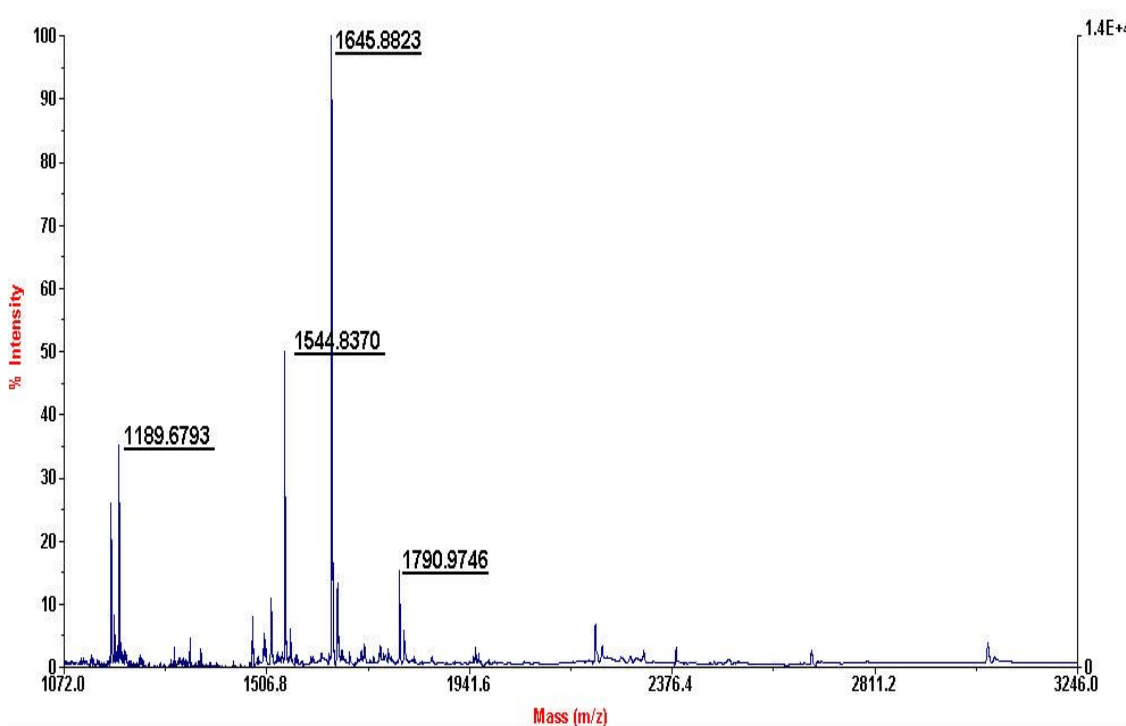

| Start - End | Observed  | Mr(expt)  | Mr(calc)  | Delta  | Miss Sequence                     |
|-------------|-----------|-----------|-----------|--------|-----------------------------------|
| 42 - 52     | 1189.6793 | 1188.6720 | 1188.6026 | 0.0694 | 0 R.DAALFPGEELK.H                 |
| 372 - 386   | 1790.9746 | 1789.9673 | 1789.8168 | 0.1506 | 1 R.IHYCDYPGCTKVYTK.S             |
| 426 - 440   | 1645.8823 | 1644.8750 | 1644.7977 | 0.0773 | 1 R.KHTGAKPFQCGVCNR.S             |
| 441 - 453   | 1544.8370 | 1543.8297 | 1543.7565 | 0.0732 | 1 R.SFSRSDHLALHMK.R Oxidation (M) |

No match to: 1172.6429

129) Coiled-coil domain-containing protein 74A

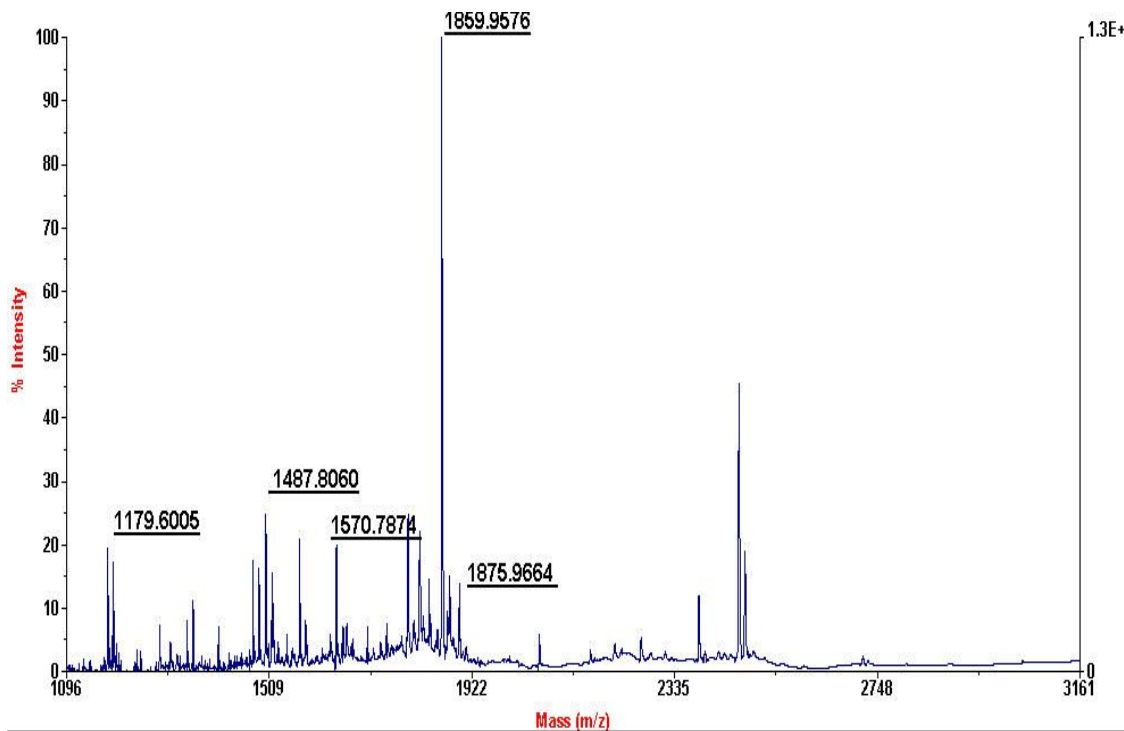

| Start - End | Observed  | Mr(expt)  | Mr(calc)  | Delta  | Miss Sequence            |
|-------------|-----------|-----------|-----------|--------|--------------------------|
| 162 - 176   | 1570.7874 | 1569.7801 | 1569.7345 | 0.0456 | 0 R.SPADSLMSSFQSVK.S     |
| 232 - 250   | 1859.9576 | 1858.9504 | 1858.7798 | 0.1705 | 0 K.AEASNAGAACMGNSQHQR.Q |
| 232 - 250   | 1875.9664 | 1874.9591 | 1874.7748 | 0.1843 | 0 K.AEASNAGAACMGNSQHQR.Q |

Oxidation (M)

|           |           |           |           |         |                     |
|-----------|-----------|-----------|-----------|---------|---------------------|
| 318 - 330 | 1487.8060 | 1486.7987 | 1486.7416 | 0.0571  | 1 R.DQEATHFPKVSTK.S |
| 345 - 355 | 1179.6005 | 1178.5932 | 1178.7387 | -0.1454 | 1 R.AILPALKQTPK.N   |

131 THUMP domain-containing protein 2

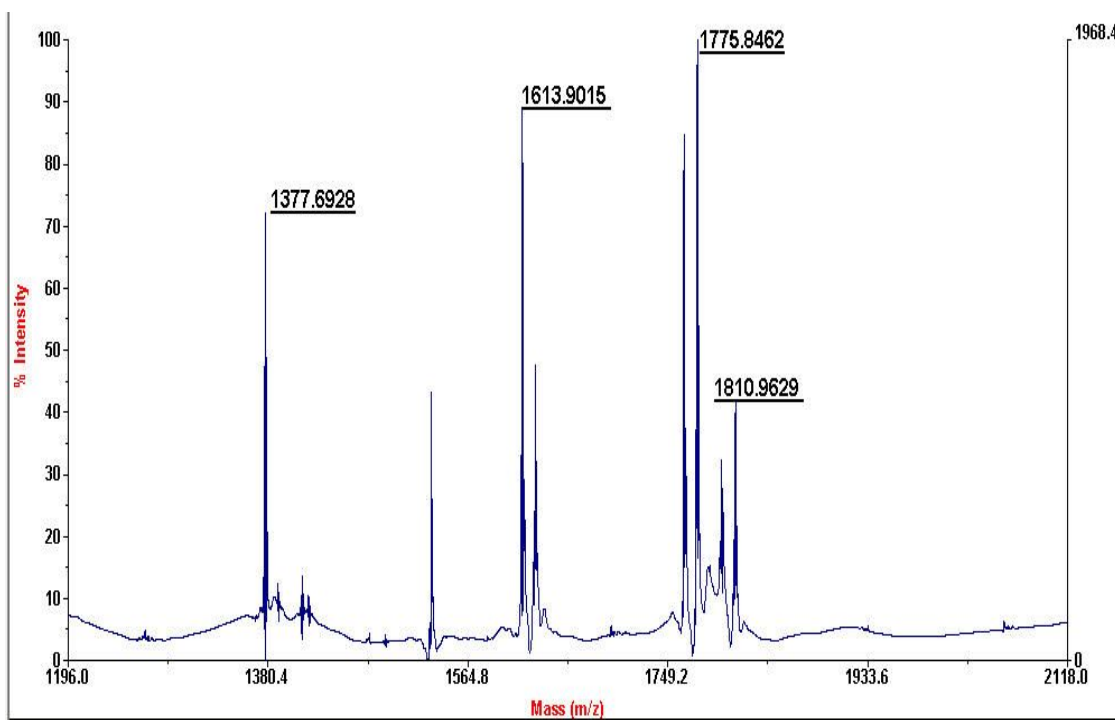

| Start - End | Observed  | Mr(expt)  | Mr(calc)  | Delta   | Miss Sequence                   |
|-------------|-----------|-----------|-----------|---------|---------------------------------|
| 190 - 206   | 1775.8462 | 1774.8389 | 1775.0015 | -0.1626 | 1 K.AFTAQEVGKVIQIIMK.H          |
| 356 - 366   | 1377.6928 | 1376.6855 | 1376.6969 | -0.0114 | 1 K.DIKSILQEMER.V Oxidation (M) |
| 423 - 438   | 1810.9629 | 1809.9556 | 1809.8646 | 0.0910  | 1 K.TASTSFEASNHKFLDR.M          |
| 439 - 452   | 1613.9015 | 1612.8943 | 1612.7629 | 0.1313  | 0 R.MSPFGSLVPVECYK.V            |

132 Voltage-dependent anion-selective channel protein 1

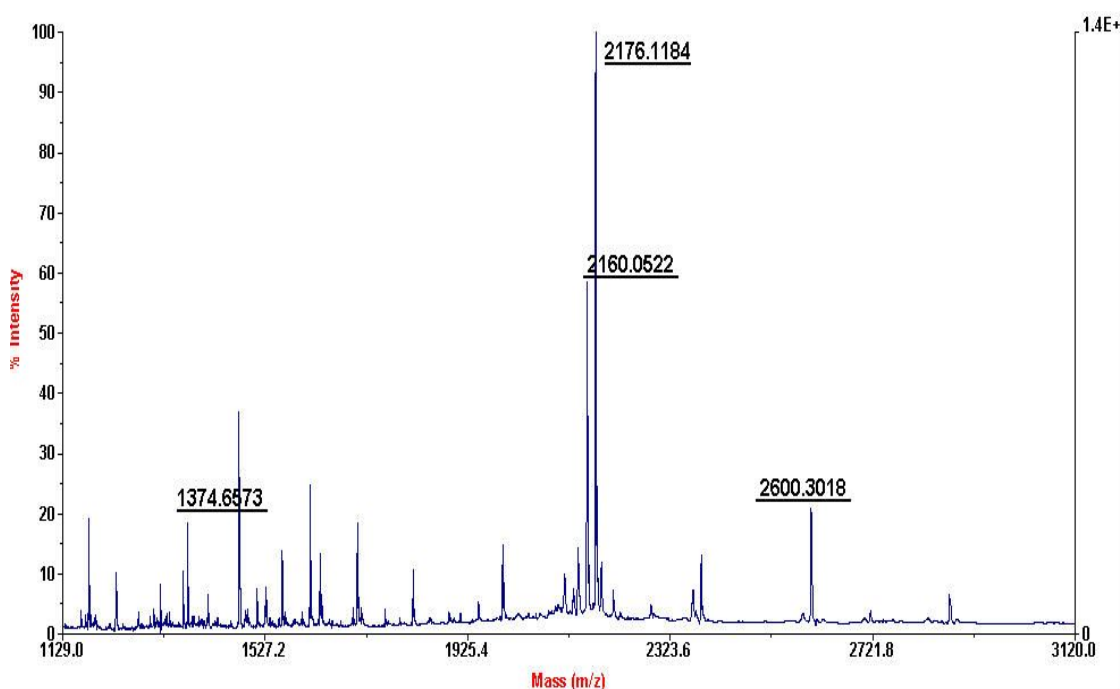

| Start - End | Observed  | Mr(expt)  | Mr(calc)  | Delta   | Miss Sequence                |
|-------------|-----------|-----------|-----------|---------|------------------------------|
| 64 - 74     | 1374.6573 | 1373.6501 | 1373.6503 | -0.0003 | 0 R.WTEYGLTFTEK.W            |
| 75 - 93     | 2176.1184 | 2175.1111 | 2175.0444 | 0.0667  | 0 K.WNTDNTLGTEITVEDQLAR.G    |
| 121 - 139   | 2160.0522 | 2159.0450 | 2158.9776 | 0.0674  | 0 R.EHINLGCDMDFDIAGPSIR.G    |
| 175 - 197   | 2600.3018 | 2599.2945 | 2599.1827 | 0.1118  | 0 K.TDEFQLHTNVNDGTEFGGSYQK.V |

No match to: 1560.8427, 1614.8994

133) Kelch repeat and BTB domain-containing protein 3

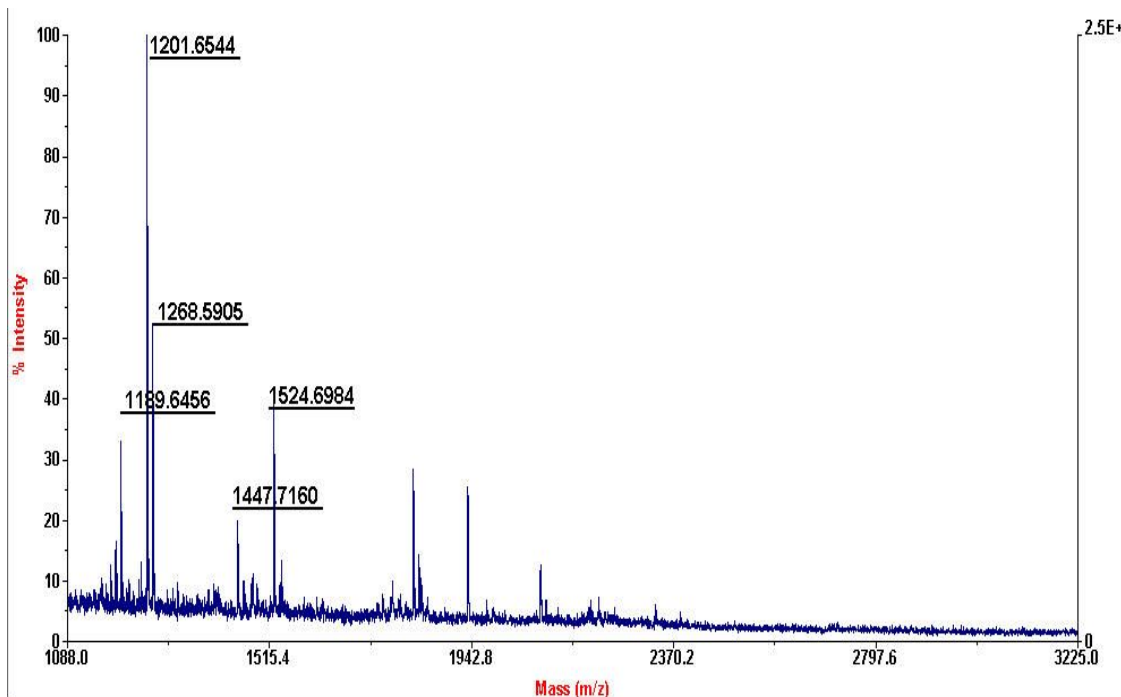

| Start - End | Observed  | Mr(expt)  | Mr(calc)  | Delta   | Miss Sequence      |
|-------------|-----------|-----------|-----------|---------|--------------------|
| 43 - 51     | 1189.6456 | 1188.6383 | 1188.5451 | 0.0932  | 0 R.EQNVFYDFK.I    |
| 52 - 63     | 1524.6984 | 1523.6911 | 1523.7952 | -0.1041 | 1 K.IIMKDEIIPCHR.C |
| 227 - 236   | 1268.5905 | 1267.5832 | 1267.7288 | -0.1456 | 1 R.QKYLPHLIEK.V   |
| 377 - 386   | 1201.6544 | 1200.6471 | 1200.5849 | 0.0622  | 0 K.NDFFLVSTMK.T   |
| 517 - 528   | 1447.7160 | 1446.7087 | 1446.6312 | 0.0775  | 0 K.VYSFCPDTCVWK.G |

No match to: 1819.9681

134 Zinc finger protein 484



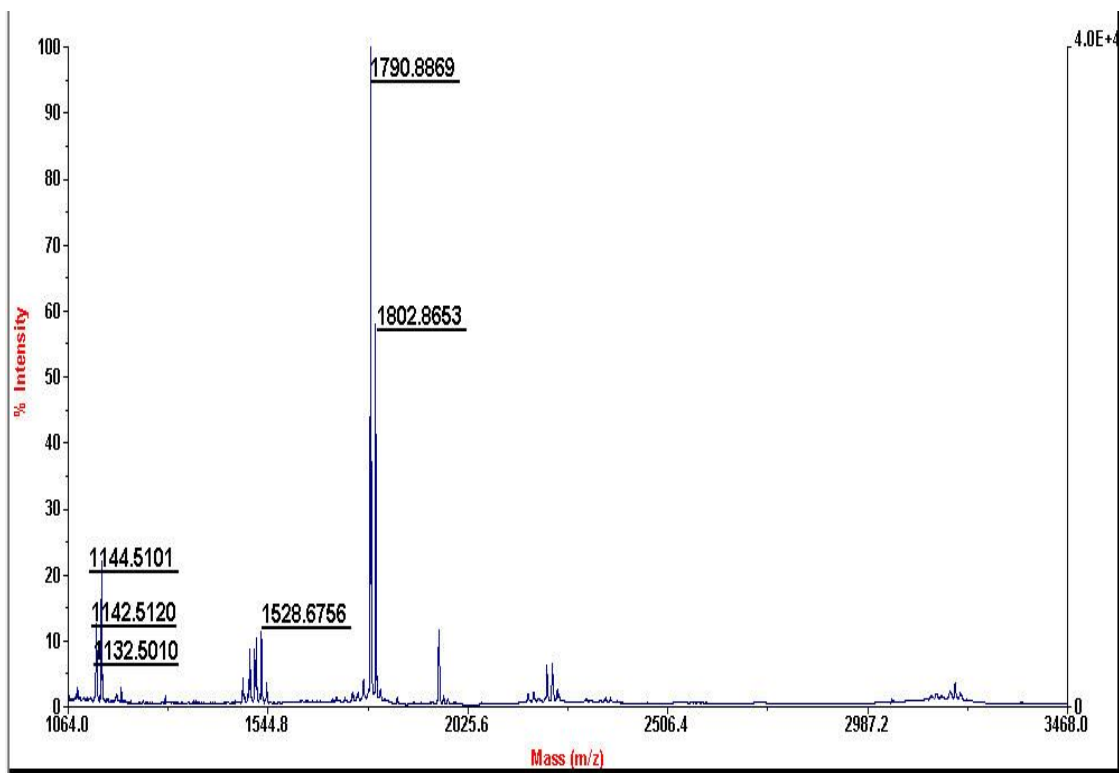

| Start - End | Observed  | Mr(expt)  | Mr(calc)  | Delta   | Miss Sequence           |
|-------------|-----------|-----------|-----------|---------|-------------------------|
| 278 - 291   | 1802.8653 | 1801.8580 | 1801.7512 | 0.1068  | 0 K.QHECHECEAVFTQK.S 2  |
| 383 - 395   | 1528.6756 | 1527.6684 | 1527.6599 | 0.0085  | 1 K.HFECTECGKAFTR.K     |
| 452 - 460   | 1132.5010 | 1131.4937 | 1131.6261 | -0.1324 | 1 K.KSQLHVHQR.I         |
| 489 - 503   | 1790.8869 | 1789.8796 | 1789.8604 | 0.0193  | 0 K.IHTGERPYICTVCGK.A 2 |
| 666 - 675   | 1144.5101 | 1143.5028 | 1143.4801 | 0.0227  | 1 K.CSDCGKAFTR.K        |
| 797 - 805   | 1142.5120 | 1141.5047 | 1141.6608 | -0.1561 | 1 K.IHTKQKPYK.C         |

135 WNT1-inducible-signaling pathway protein 1

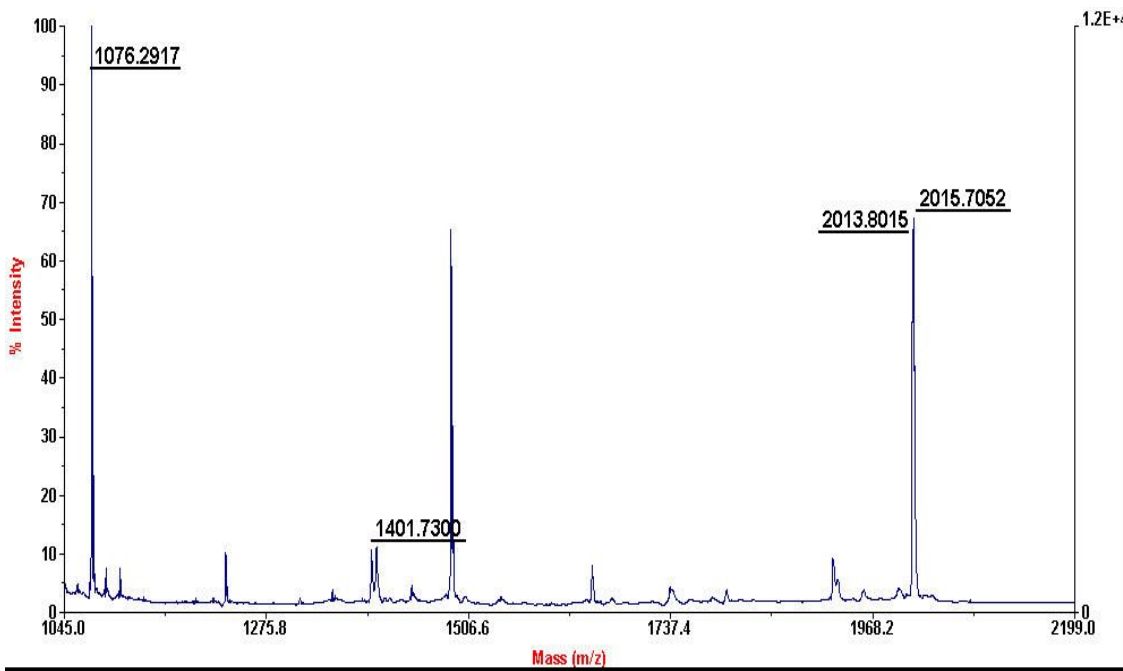

| Start - End | Observed  | Mr(expt)  | Mr(calc)  | Delta   | Miss Sequence                 |
|-------------|-----------|-----------|-----------|---------|-------------------------------|
| 98 - 109    | 1401.7300 | 1400.7227 | 1400.6143 | 0.1084  | 0 R.GLYCDYSGDRPR.Y            |
| 142 - 159   | 2015.7052 | 2014.6979 | 2014.8733 | -0.1754 | 0 K.YNCTCIDGAVGCTPLCLR.V 2    |
| 300 - 308   | 1076.2917 | 1075.2844 | 1075.3885 | -0.1041 | 0 K.YCGVCMDNR.C Oxidation (M) |
| 315 - 332   | 2013.8015 | 2012.7942 | 2012.9626 | -0.1684 | 1 K.SKTIDVSFQCPDGLGFSR.Q      |

No match to: 1486.4408

136 Heterogeneous nuclear ribonucleoproteins A2/B1

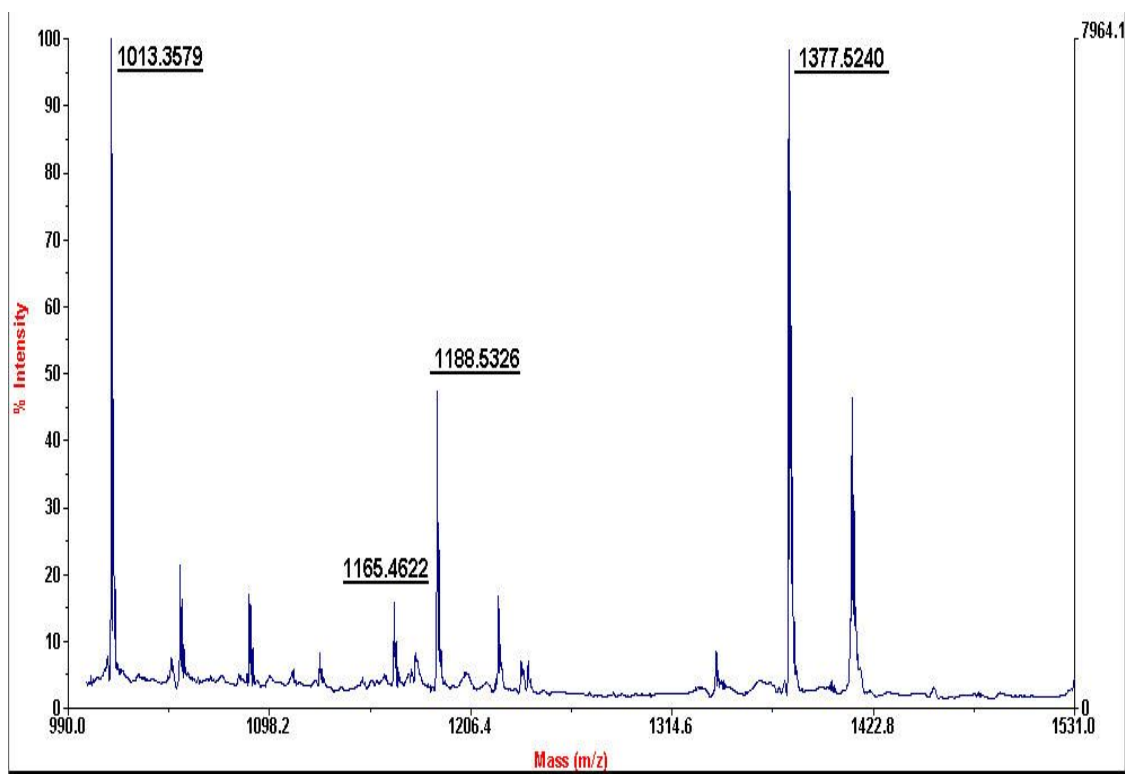

| Start - End | Observed  | Mr(expt)  | Mr(calc)  | Delta   | Miss Sequence       |
|-------------|-----------|-----------|-----------|---------|---------------------|
| 121 - 129   | 1165.4622 | 1164.4549 | 1164.5159 | -0.0610 | 0 K.EDTEEHHLR.D     |
| 138 - 147   | 1188.5326 | 1187.5253 | 1187.6398 | -0.1144 | 0 K.IDTIEIITDR.Q    |
| 204 - 213   | 1013.3579 | 1012.3507 | 1012.4363 | -0.0856 | 0 R.GGNFGFGDSR.G    |
| 214 - 228   | 1377.5240 | 1376.5167 | 1376.6222 | -0.1055 | 0 R.GGGNFGPGPSNFR.G |

No match to: 1995.0497

137 Stress-70 protein

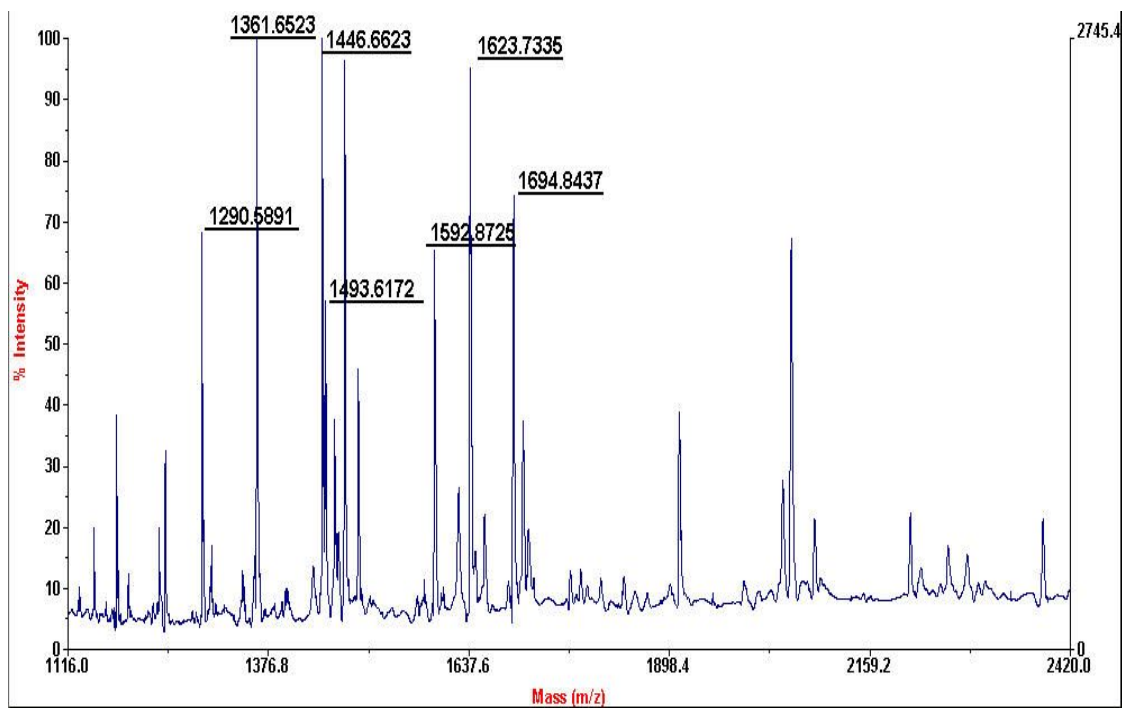

| Start - End | Observed  | Mr(expt)  | Mr(calc)  | Delta   | Miss Sequence          |
|-------------|-----------|-----------|-----------|---------|------------------------|
| 188 - 202   | 1694.8437 | 1693.8365 | 1693.8424 | -0.0059 | 0 K.NAVITVPAYFNDSQR.Q  |
| 349 - 360   | 1361.6523 | 1360.6450 | 1360.7351 | -0.0901 | 0 R.AQFEGIVTDLIR.R     |
| 378 - 391   | 1446.6623 | 1445.6550 | 1445.7548 | -0.0998 | 0 K.SDIGEVILVGMTR.M    |
| 395 - 405   | 1290.5891 | 1289.5818 | 1289.6728 | -0.0910 | 0 K.VQQTVDLFR.A        |
| 486 - 498   | 1493.6172 | 1492.6099 | 1492.6398 | -0.0300 | 1 K.VCQGEREMAGDNK.L    |
| 499 - 513   | 1592.8725 | 1591.8652 | 1591.9450 | -0.0797 | 0 K.LLGQFTLIGIPPAPR.G  |
| 660 - 675   | 1623.7335 | 1622.7262 | 1622.7020 | 0.0243  | 1 R.EGSGSSGTGEQKEDQK.E |

No match to: 1475.6811, 1638.8288, 1708.3663

138 Pantothenate kinase 3

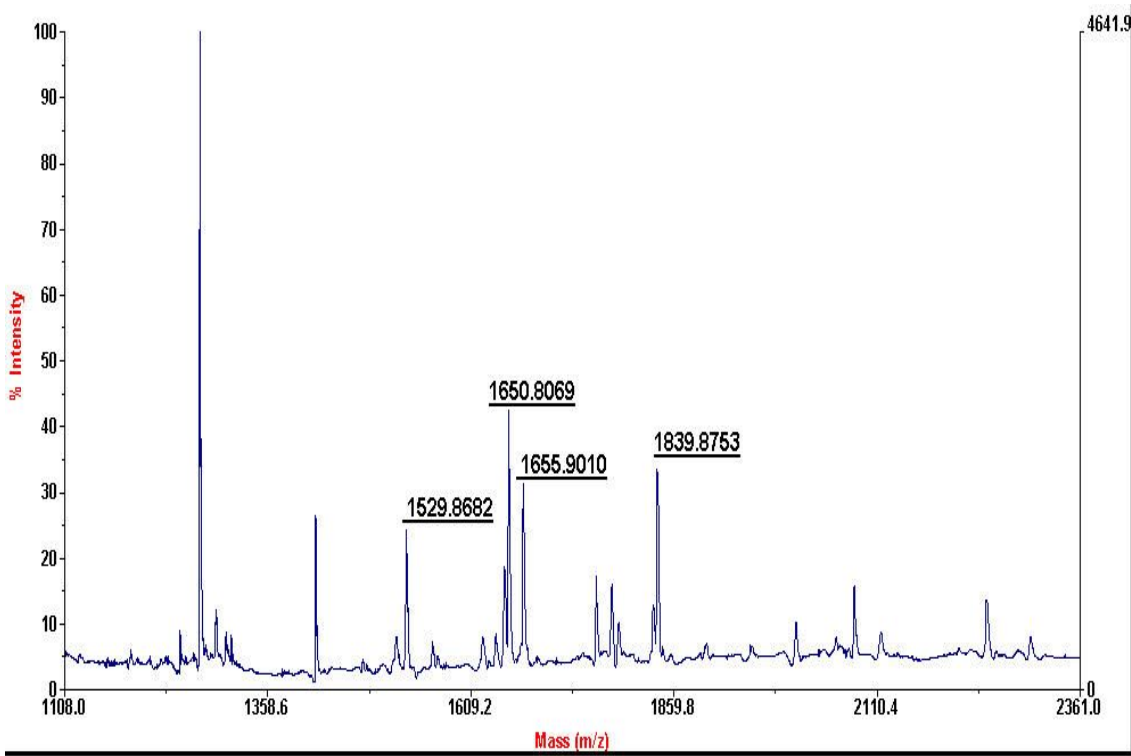

| Start - End | Observed  | Mr(expt)  | Mr(calc)  | Delta   | Miss Sequence                    |
|-------------|-----------|-----------|-----------|---------|----------------------------------|
| 65 - 78     | 1655.9010 | 1654.8937 | 1654.9043 | -0.0105 | 1 R.DVHLELKDLTLFGR.R             |
| 87 - 100    | 1650.8069 | 1649.7996 | 1649.8236 | -0.0240 | 0 R.FPTQDLPTFIQMGR.D             |
| 292 - 306   | 1529.8682 | 1528.8610 | 1528.8573 | 0.0037  | 0 R.ATLVITITNIGSVAR.M            |
| 317 - 332   | 1839.8753 | 1838.8680 | 1839.0077 | -0.1397 | 1 R.VVFVGNFLRVNTLSMK.L Oxidation |

(M)

No match to: 1274.7094, 1783.4429

139 L-lactate dehydrogenase A-like 6A

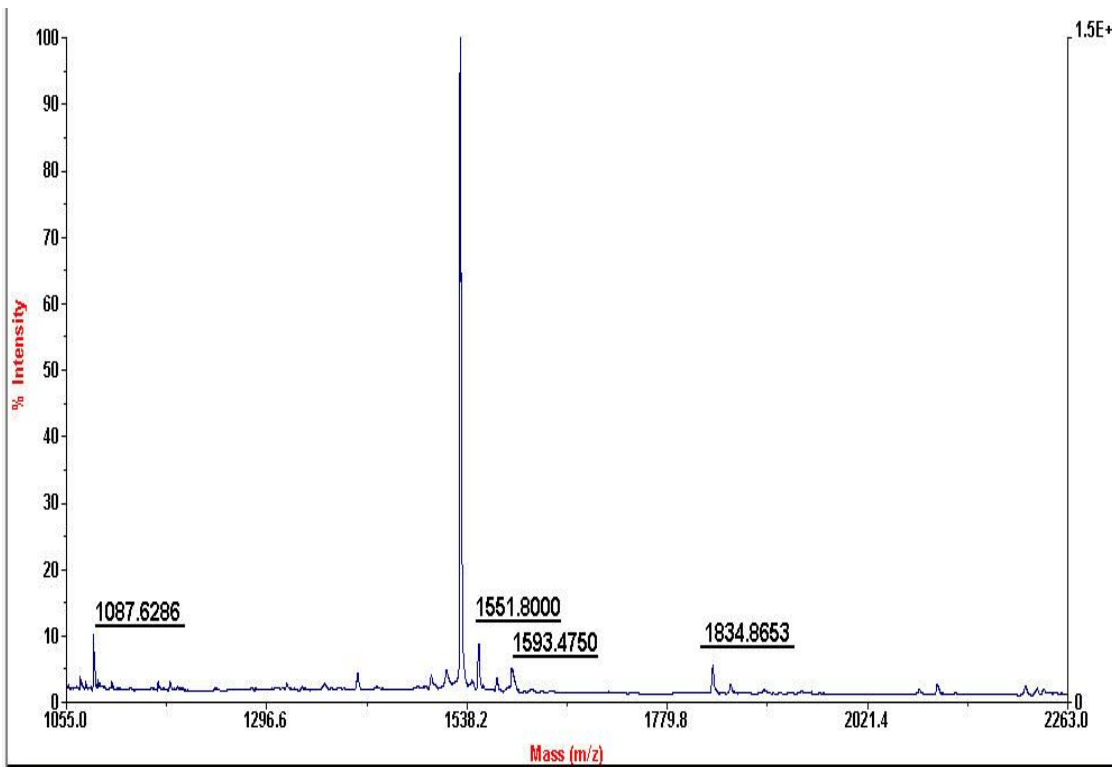

| Start - End | Observed  | Mr(expt)  | Mr(calc)  | Delta   | Miss Sequence           |
|-------------|-----------|-----------|-----------|---------|-------------------------|
| 133 - 140   | 1009.3673 | 1008.3600 | 1008.4413 | -0.0813 | 0 R.HAYGDQYR.A          |
| 223 - 233   | 1445.6523 | 1444.6450 | 1444.7238 | -0.0788 | 1 R.FKDIFQEIYDK.Q       |
| 225 - 233   | 1170.5532 | 1169.5459 | 1169.5604 | -0.0145 | 0 K.DIFQEIYDK.Q         |
| 261 - 270   | 1154.4510 | 1153.4437 | 1153.5226 | -0.0789 | 0 K.SEGGFIWACK.N        |
| 302 - 314   | 1341.6046 | 1340.5973 | 1340.6684 | -0.0711 | 0 K.TVEAEAAHGTVTR.H     |
| 322 - 338   | 1879.0925 | 1878.0853 | 1877.9272 | 0.1581  | 0 K.GQETSTNPIASIFAWTR.G |

No match to: 1021.3626, 1138.6243, 1910.9845

140 Spermatogenesis- and oogenesis-specific basic helix-loop-helix-containing protein 2

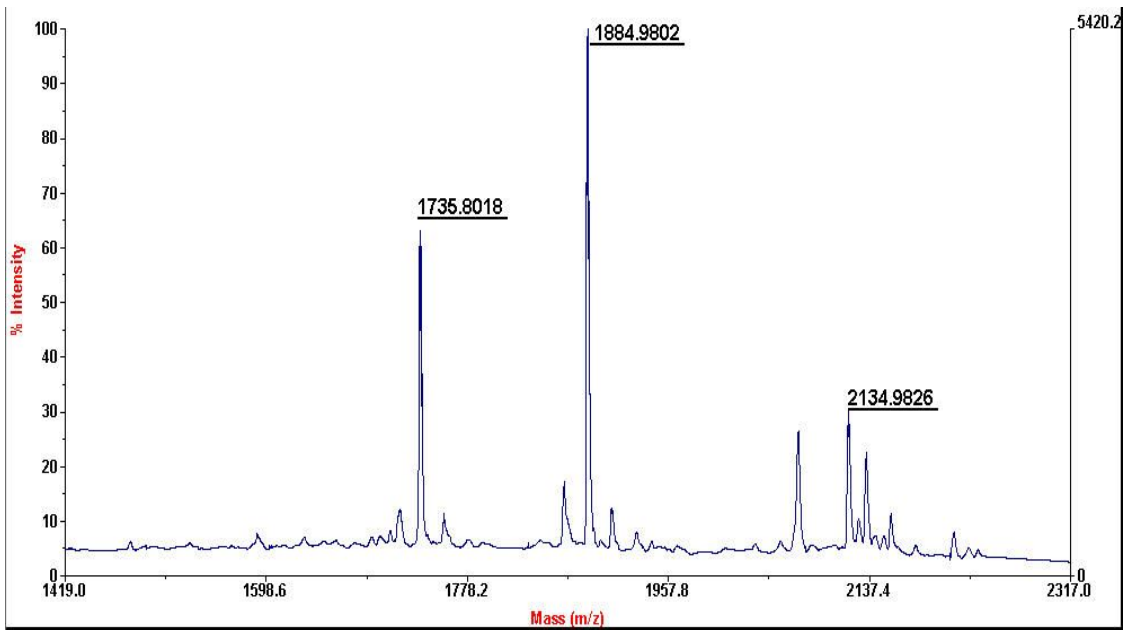

| Start - End | Observed  | Mr(expt)  | Mr(calc)  | Delta   | Miss Sequence                |
|-------------|-----------|-----------|-----------|---------|------------------------------|
| 39 - 54     | 1735.8018 | 1734.7945 | 1734.9404 | -0.1458 | 0 K.LFANIAEVTITISDTK.E       |
| 109 - 128   | 2134.9826 | 2133.9754 | 2133.9745 | 0.0009  | 0 K.GCISGHGMDIALTEPLTMEK.M 2 |

Oxidation (M)

|           |           |           |           |         |                         |
|-----------|-----------|-----------|-----------|---------|-------------------------|
| 278 - 294 | 1884.9802 | 1883.9729 | 1883.9775 | -0.0046 | 0 K.QQTPIELSLPGTVMAQR.E |
|-----------|-----------|-----------|-----------|---------|-------------------------|

Oxidation (M)

No match to: 1338.4548

141 spermatogenesis associated 6

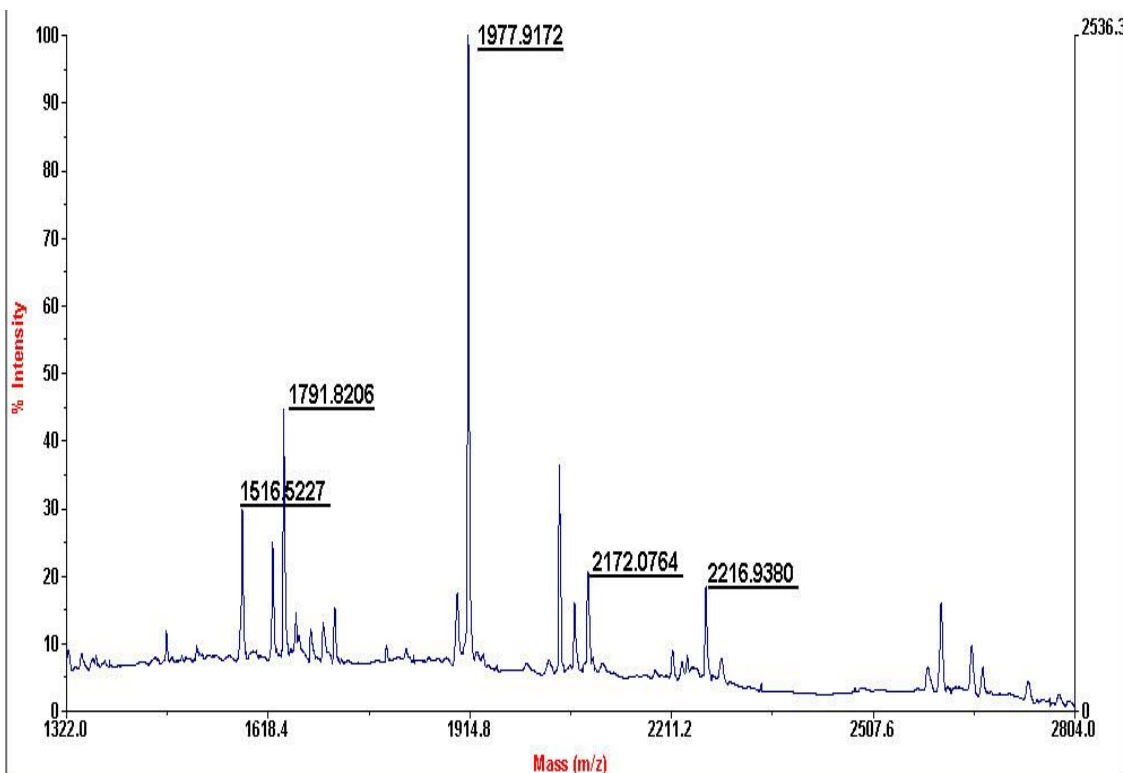

| Start - End | Observed  | Mr(expt)  | Mr(calc)  | Delta   | Miss Sequence               |
|-------------|-----------|-----------|-----------|---------|-----------------------------|
| 6 - 26      | 2172.0764 | 2171.0691 | 2171.1694 | -0.1002 | 0 K.ALQCALALEISSVTCPGVVLK.D |
| 27 - 42     | 1977.9172 | 1976.9099 | 1976.9554 | -0.0455 | 1 K.DKEDIYLSICVFGQYK.K      |
| 43 - 58     | 1791.8206 | 1790.8133 | 1790.9502 | -0.1368 | 1 K.KTQCVPATFPLVFNAR.M      |
| 307 - 319   | 1516.5227 | 1515.5155 | 1515.6954 | -0.1799 | 1 R.TPHGRDFDDSLEK.C         |
| 420 - 438   | 2216.9380 | 2215.9308 | 2215.9923 | -0.0615 | 1 R.GTFHLDDGEYWSNRAASYK.G   |

No match to: 1500.4144

142 60S ribosomal protein L13a

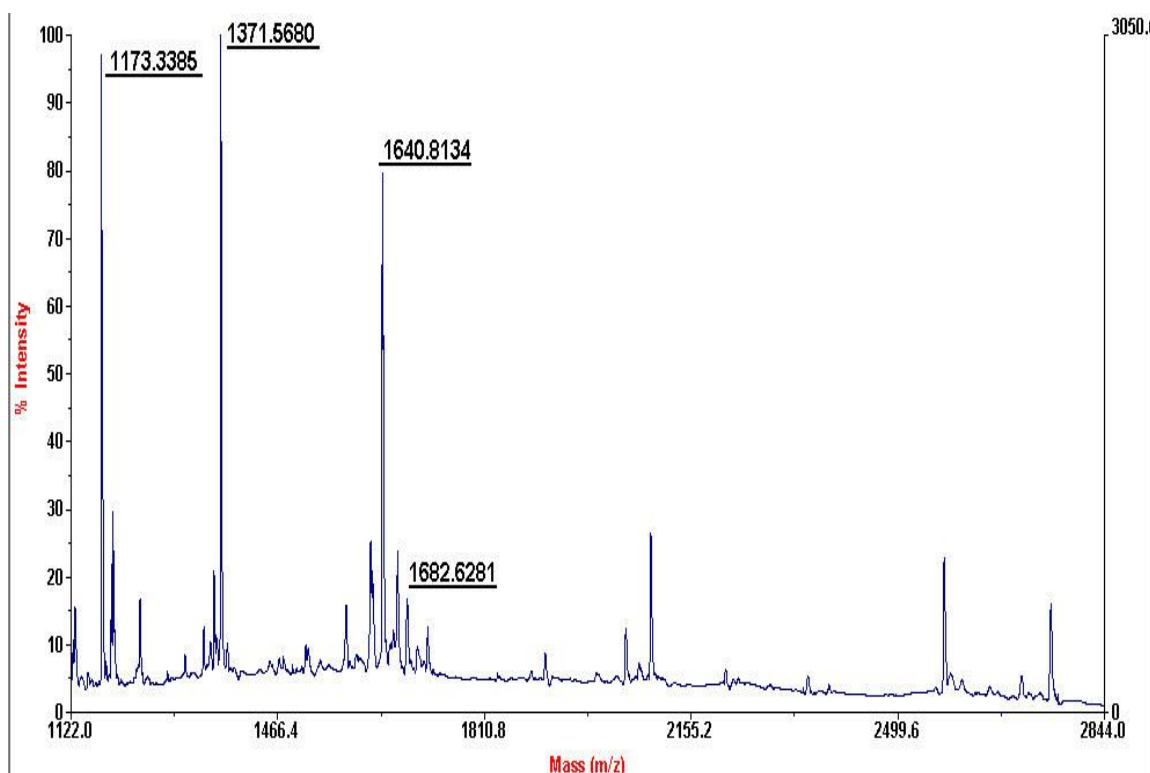

| Start - End | Observed  | Mr(expt)  | Mr(calc)  | Delta   | Miss Sequence                      |
|-------------|-----------|-----------|-----------|---------|------------------------------------|
| 21 - 32     | 1371.5680 | 1370.5607 | 1370.7493 | -0.1885 | 1 R.KHGVVPLATYMR.I                 |
| 51 - 60     | 1173.3385 | 1172.3312 | 1172.5219 | -0.1907 | 1 K.GMPHKCYHGK.T Oxidation (M)     |
| 64 - 78     | 1640.8134 | 1639.8061 | 1639.9046 | -0.0985 | 0 R.VYNVTQHAVGIVVNK.Q              |
| 147 - 160   | 1682.6281 | 1681.6208 | 1681.7909 | -0.1701 | 0 K.QPELLEPISYEFMA.- Oxidation (M) |

No match to: 2088.8146

143 SALL1 protein



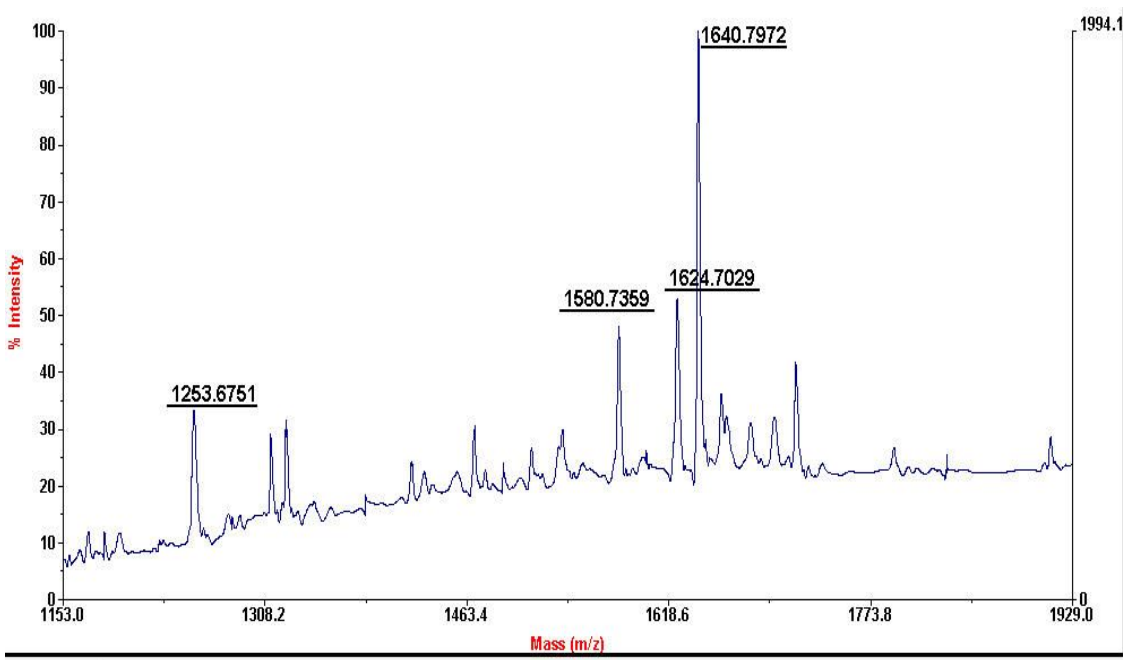

| Start - End | Observed  | Mr(expt)  | Mr(calc)  | Delta   | Miss Sequence                  |
|-------------|-----------|-----------|-----------|---------|--------------------------------|
| 2 - 15      | 1624.7029 | 1623.6956 | 1623.7399 | -0.0443 | 0 M.VHMGTHMWNSTPAR.R           |
| 2 - 15      | 1640.7972 | 1639.7899 | 1639.7348 | 0.0552  | 0 M.VHMGTHMWNSTPAR.R Oxidation |

(M)

|           |           |           |           |         |                        |
|-----------|-----------|-----------|-----------|---------|------------------------|
| 108 - 122 | 1580.7359 | 1579.7286 | 1579.8205 | -0.0919 | 0 R.LQNSEP NAPLAGLEK.M |
| 137 - 147 | 1253.6751 | 1252.6678 | 1252.6187 | 0.0492  | 1 R.FVEDSKEIVTS.-      |

144 Adenylate kinase isoenzyme 4

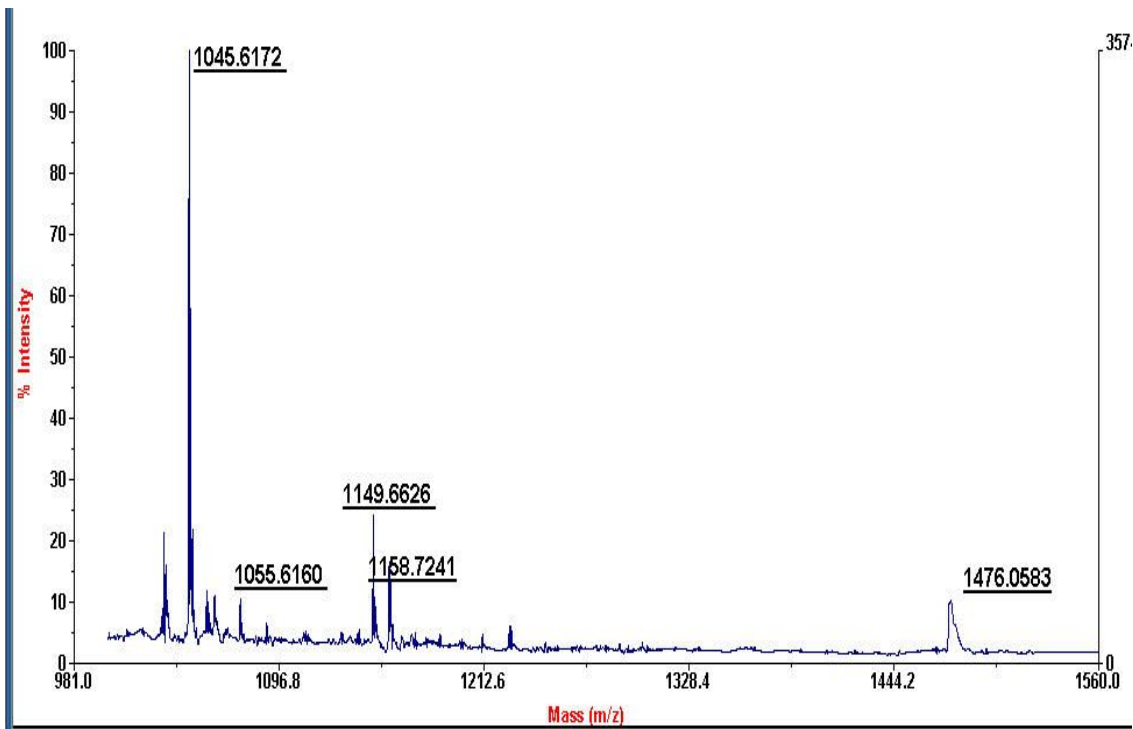

| Start - End | Observed | Mr(expt) | Mr(calc) | Delta | Miss Sequence |
|-------------|----------|----------|----------|-------|---------------|
|-------------|----------|----------|----------|-------|---------------|

|           |           |           |           |        |   |                   |
|-----------|-----------|-----------|-----------|--------|---|-------------------|
| 1 - 9     | 1055.6160 | 1054.6087 | 1054.4576 | 0.1511 | 0 | -.MGGFMEDLR.K     |
| 13 - 24   | 1158.7241 | 1157.7168 | 1157.6808 | 0.0360 | 0 | K.IIFIIGGPGSGK.G  |
| 59 - 66   | 1045.6172 | 1044.6099 | 1044.5750 | 0.0350 | 1 | K.LIRDIMER.G      |
| 81 - 91   | 1149.6626 | 1148.6553 | 1148.5496 | 0.1058 | 0 | K.EAMVASLGDTR.G   |
| 138 - 151 | 1476.0583 | 1475.0510 | 1474.7879 | 0.2631 | 1 | R.SSLPVDDTTKTIK.R |

No match to: 1031.5269, 1607.0269

#### 145 WAP four-disulfide core domain 2

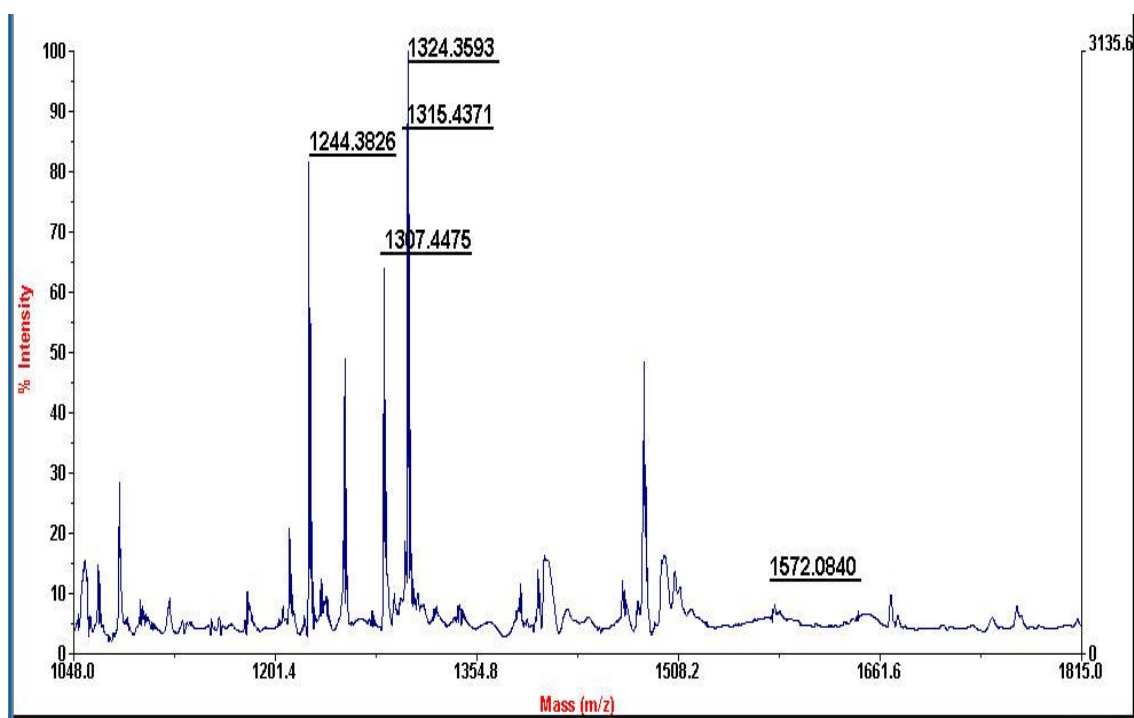

| Start - End | Observed  | Mr(expt)  | Mr(calc)  | Delta   | Miss Sequence        |
|-------------|-----------|-----------|-----------|---------|----------------------|
| 5 - 17      | 1324.3593 | 1323.3520 | 1323.7510 | -0.3990 | 0 R.NTIKPGSAQLPAK.H  |
| 82 - 91     | 1315.4371 | 1314.4298 | 1314.5672 | -0.1373 | 1 R.KCCYLHCGFK.C 2   |
| 83 - 91     | 1244.3826 | 1243.3754 | 1243.4937 | -0.1183 | 0 K.CCYLHCGFK.C 3    |
| 92 - 105    | 1572.0840 | 1571.0768 | 1570.8025 | 0.2743  | 1 K.CVIPVKELEEGGNK.D |
| 122 - 133   | 1307.4475 | 1306.4403 | 1306.5758 | -0.1356 | 1 K.CPGSSSTRCPQK.-   |

No match to: 2143.8098

#### 146 Calpain small subunit 1

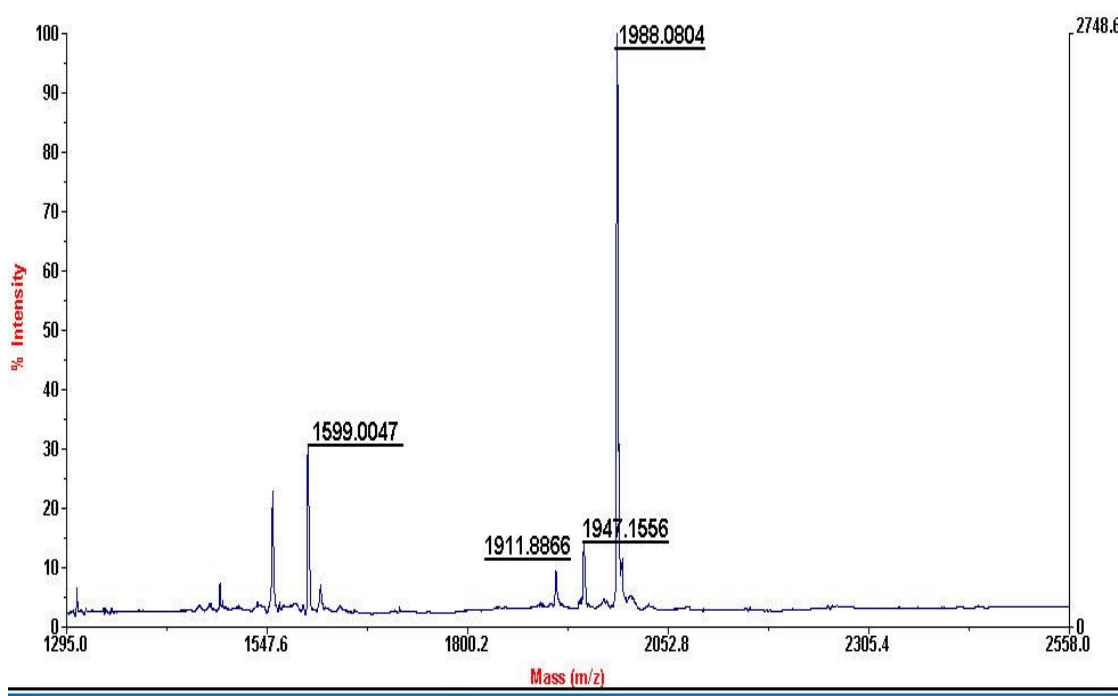

| Start - End | Observed  | Mr(expt)  | Mr(calc)  | Delta   | Miss Sequence            |
|-------------|-----------|-----------|-----------|---------|--------------------------|
| 229 - 246   | 1988.0804 | 1987.0732 | 1987.0275 | 0.0456  | 1 R.AGARELGEFHAFIVSDLR.E |
| 247 - 260   | 1599.0047 | 1597.9975 | 1597.8610 | 0.1365  | 0 R.ELQQAGQCILLR.I       |
| 416 - 432   | 1947.1556 | 1946.1484 | 1946.0275 | 0.1209  | 1 K.HYQAVGLHLWKVPEGGR.S  |
| 453 - 469   | 1911.8866 | 1910.8793 | 1910.9924 | -0.1131 | 1 R.YAQEVSRLLPAGTYK.V    |

No match to: 1554.4414

147 Glycoprotein-N-acetylgalactosamine 3-beta-galactosyltransferase 1

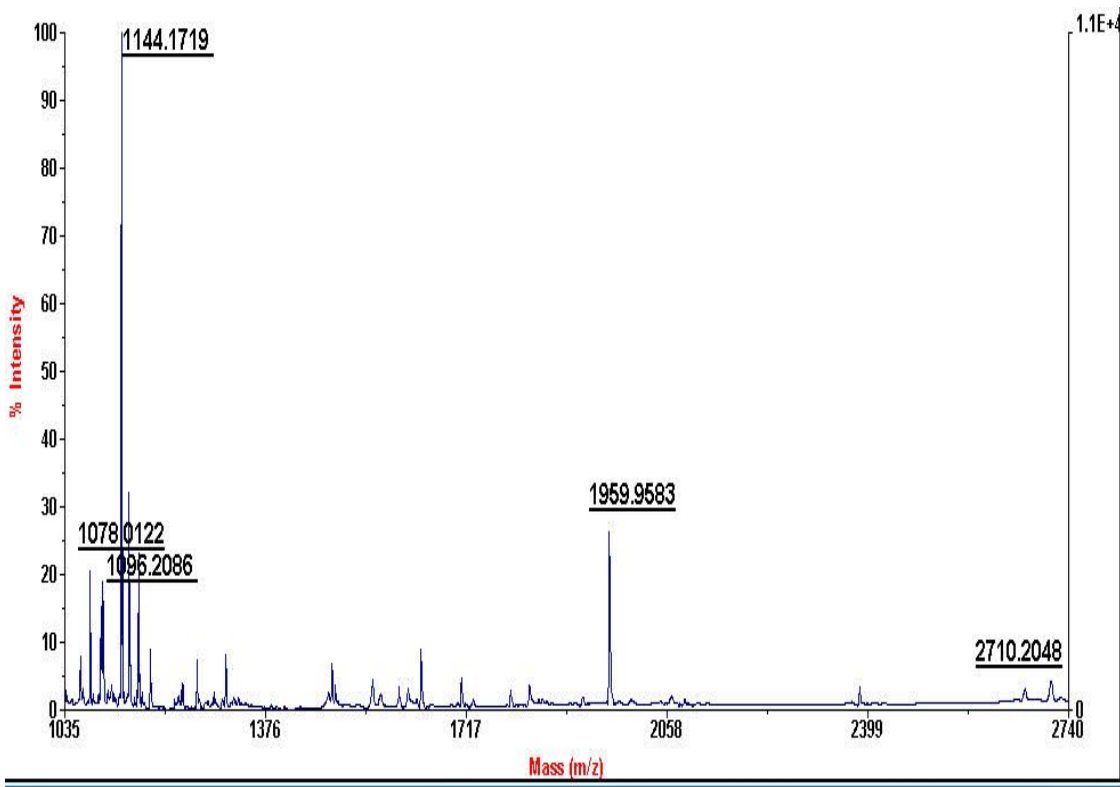

| Start - End | Observed | Mr(expt) | Mr(calc) | Delta | Miss Sequence |
|-------------|----------|----------|----------|-------|---------------|
|-------------|----------|----------|----------|-------|---------------|

|         |           |           |           |        |   |
|---------|-----------|-----------|-----------|--------|---|
| 50 - 73 | 2710.2048 | 2709.1975 | 2709.1222 | 0.0753 | 0 |
|---------|-----------|-----------|-----------|--------|---|

**R.HSDDNGQNHLEGQMNFNADSSQHK.D**

|          |           |           |           |         |                          |
|----------|-----------|-----------|-----------|---------|--------------------------|
| 87 - 102 | 1959.9583 | 1958.9511 | 1959.0070 | -0.0560 | 1 K.VRILCWVMTGPQNLEK.K ; |
|----------|-----------|-----------|-----------|---------|--------------------------|

Oxidation (M)

|           |           |           |           |         |                 |
|-----------|-----------|-----------|-----------|---------|-----------------|
| 106 - 114 | 1096.2086 | 1095.2013 | 1095.5938 | -0.3924 | 1 K.HVKATWAQR.C |
|-----------|-----------|-----------|-----------|---------|-----------------|

|           |           |           |           |        |                 |
|-----------|-----------|-----------|-----------|--------|-----------------|
| 109 - 117 | 1078.0122 | 1077.0049 | 1076.5185 | 0.4864 | 1 K.ATWAQRCNK.V |
|-----------|-----------|-----------|-----------|--------|-----------------|

|           |           |           |           |        |                  |
|-----------|-----------|-----------|-----------|--------|------------------|
| 343 - 352 | 1144.1719 | 1143.1646 | 1142.6659 | 0.4987 | 1 R.ILKEISQANK.N |
|-----------|-----------|-----------|-----------|--------|------------------|

No match to: 1099.9361, 1160.1693

148 RNA (guanine-9-) methyltransferase domain containing 2

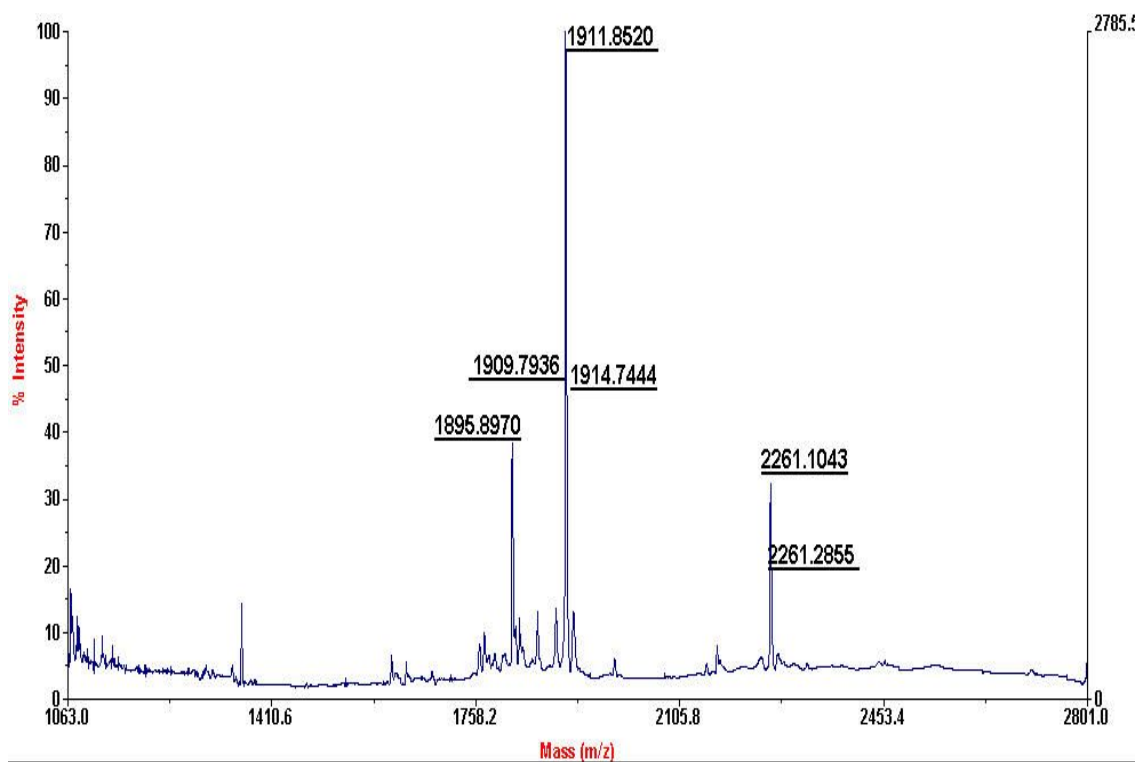

| Start - End   | Observed  | Mr(expt)  | Mr(calc)  | Delta   | Miss Sequence              |
|---------------|-----------|-----------|-----------|---------|----------------------------|
| 2 - 18        | 1895.8970 | 1894.8897 | 1894.9346 | -0.0449 | 1 M.SSEMLPAFIETSNVDKK.Q    |
| 2 - 18        | 1911.8520 | 1910.8448 | 1910.9295 | -0.0848 | 1 M.SSEMLPAFIETSNVDKK.Q    |
| Oxidation (M) |           |           |           |         |                            |
| 74 - 89       | 1914.7444 | 1913.7372 | 1913.8108 | -0.0736 | 1 K.LERQCQMEPNSDGHDR.K     |
| 196 - 215     | 2261.1043 | 2260.0971 | 2260.1236 | -0.0266 | 1 K.ELDESKAYVIGGLVDHNHHK.G |
| 196 - 215     | 2261.2855 | 2260.2783 | 2260.1236 | 0.1546  | 1 K.ELDESKAYVIGGLVDHNHHK.G |
| 297 - 313     | 1909.7936 | 1908.7864 | 1908.6803 | 0.1061  | 0 R.MEEGGSDSDSSEEEYSR.N    |

Oxidation (M)

No match to: 1820.7724

149 Sperm-associated antigen 4-like protein

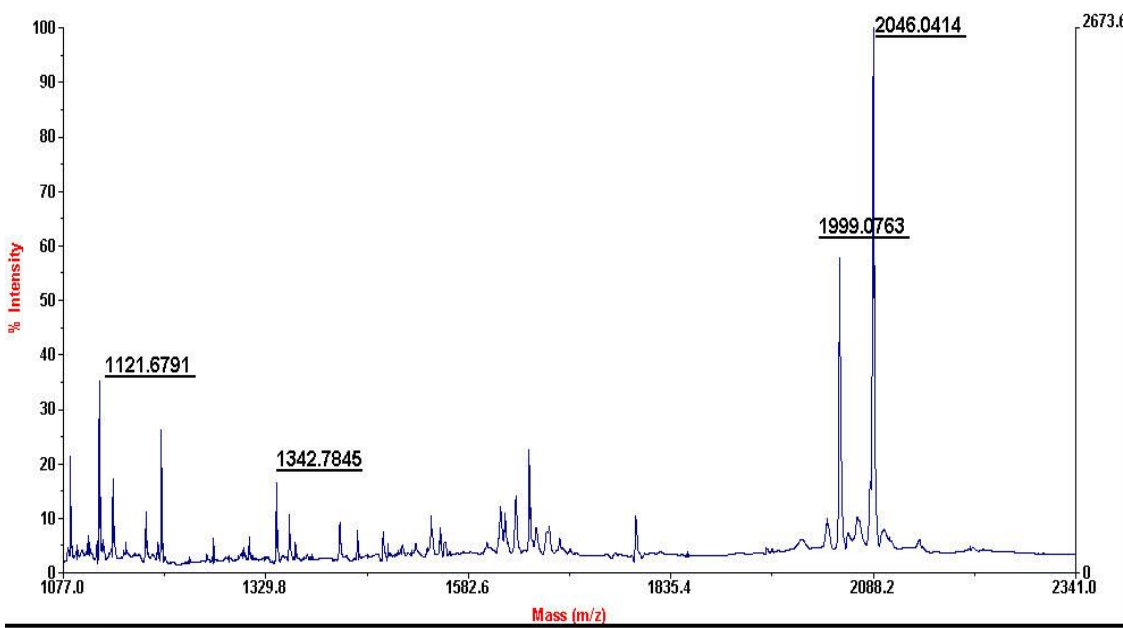

| Start - End   | Observed  | Mr(expt)  | Mr(calc)  | Delta  | Miss Sequence                 |
|---------------|-----------|-----------|-----------|--------|-------------------------------|
| 37 - 54       | 2046.0414 | 2045.0341 | 2044.9558 | 0.0784 | 0 R.MAEDTSPNMNDNILLPVR.N      |
| Oxidation (M) |           |           |           |        |                               |
| 96 - 104      | 1121.6791 | 1120.6718 | 1120.5984 | 0.0734 | 1 K.LLCQKLMEK.T Oxidation (M) |
| 295 - 306     | 1342.7845 | 1341.7772 | 1341.6275 | 0.1497 | 0 K.DFVIYGMEGSPK.E            |
| 340 - 356     | 1999.0763 | 1998.0690 | 1997.9782 | 0.0909 | 1 K.VKISSNWGNPGFTCLYR.V       |

No match to: 1641.9232

150Gamma-enolase

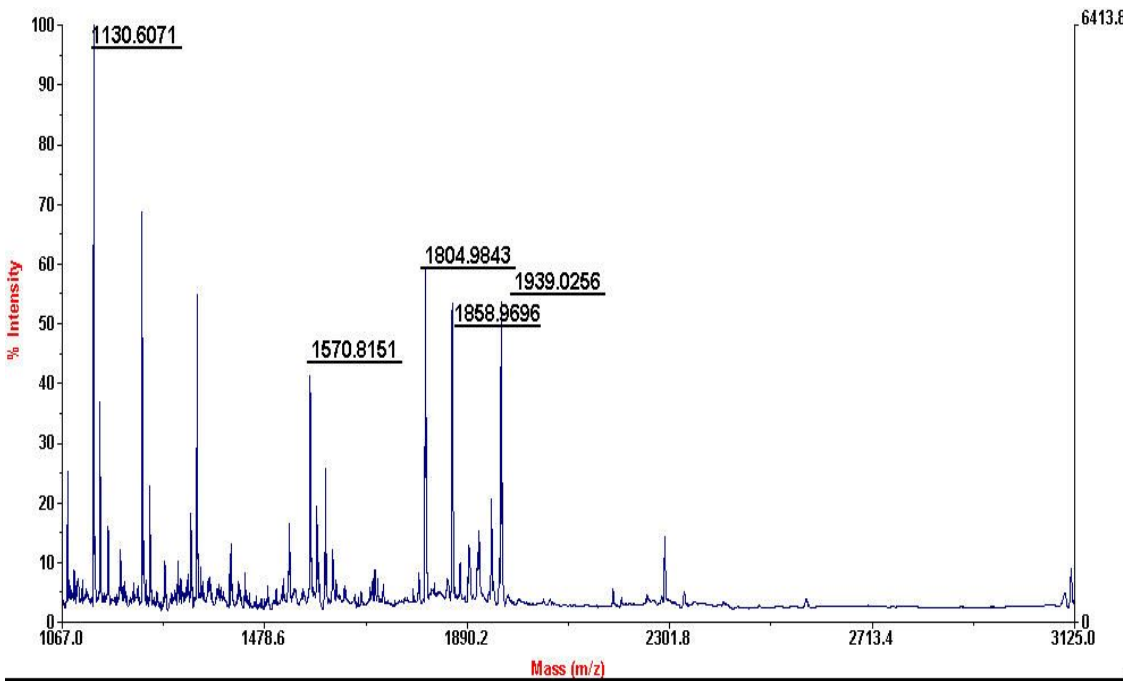

| Start - End | Observed | Mr(expt) | Mr(calc) | Delta | Miss Sequence |
|-------------|----------|----------|----------|-------|---------------|
|-------------|----------|----------|----------|-------|---------------|

|           |           |           |           |         |   |                        |
|-----------|-----------|-----------|-----------|---------|---|------------------------|
| 33 - 50   | 1804.9843 | 1803.9771 | 1803.9366 | 0.0405  | 0 | R.AAVPSGASTGIYEALELR.D |
| 163 - 179 | 1939.0256 | 1938.0183 | 1937.9742 | 0.0441  | 0 | K.LAMQEFMILPVGAESFR.D  |
| 184 - 193 | 1130.6071 | 1129.5998 | 1129.6131 | -0.0133 | 0 | R.LGAEVYHTLK.G         |
| 240 - 253 | 1570.8151 | 1569.8078 | 1569.7860 | 0.0218  | 0 | K.IVIGMDVAASEFYR.D     |
| 270 - 285 | 1858.9696 | 1857.9623 | 1857.9261 | 0.0363  | 0 | R.YITGDQLGALYQDFVR.D   |

No match to: 1143.6408, 1229.6032, 1340.6368, 1959.0208

### 151 Rho GDP-dissociation inhibitor 1

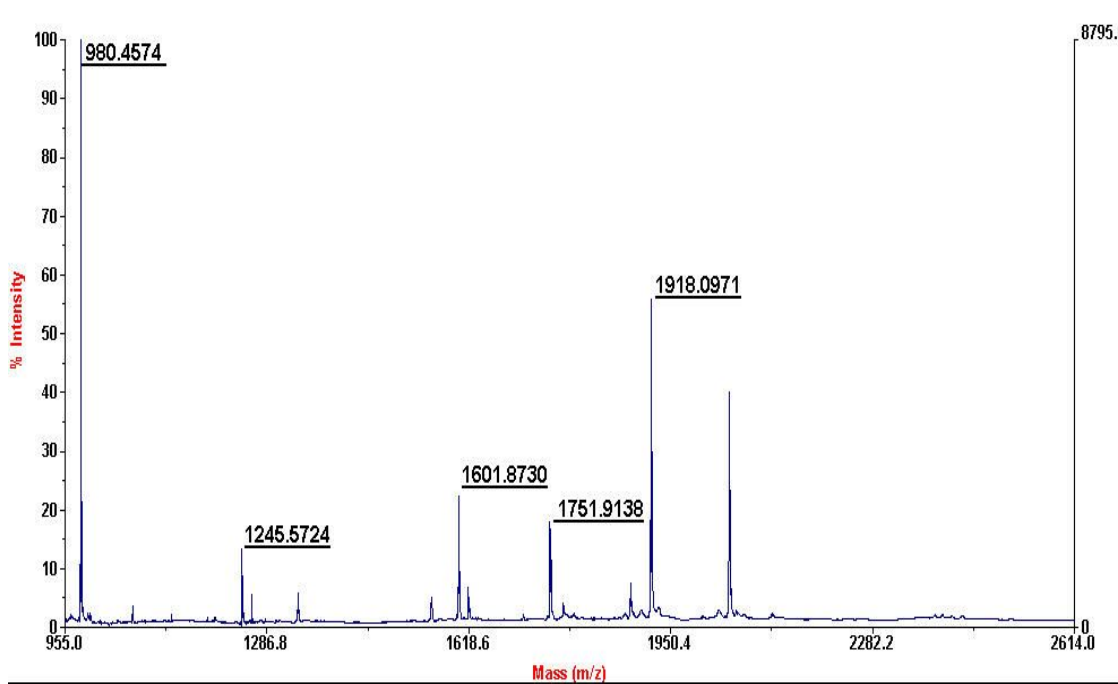

| Start - End | Observed  | Mr(expt)  | Mr(calc)  | Delta   | Miss Sequence         |
|-------------|-----------|-----------|-----------|---------|-----------------------|
| 34 - 49     | 1918.0971 | 1917.0898 | 1916.9327 | 0.1572  | 1 K.SIQEIQLDKDDESLR.K |
| 128 - 134   | 980.4574  | 979.4501  | 979.4875  | -0.0375 | 0 K.YIQHTYR.K         |
| 139 - 152   | 1601.8730 | 1600.8657 | 1600.7555 | 0.1102  | 1 K.IDKTDYMVGSYGPR.A  |
| 142 - 152   | 1245.5724 | 1244.5652 | 1244.5495 | 0.0156  | 0 K.TDYMVGSYGPR.A     |
| 153 - 167   | 1751.9138 | 1750.9065 | 1750.8301 | 0.0765  | 0 R.AEEYEFLTPVEEAPK.G |

No match to: 2046.1784

### 152 ) Fatty acid-binding protein

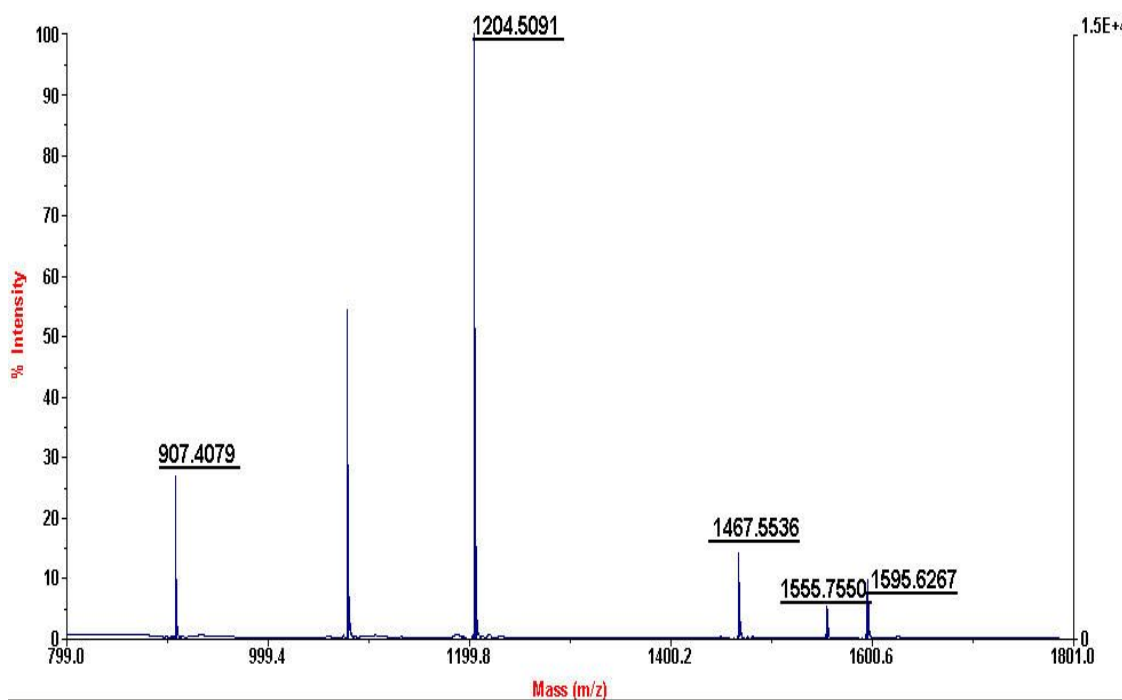

| Start - End | Observed  | Mr(expt)  | Mr(calc)  | Delta   | Miss Sequence        |
|-------------|-----------|-----------|-----------|---------|----------------------|
| 23 - 31     | 907.4079  | 906.4007  | 906.4923  | -0.0917 | 0 K.SLGVGFATR.Q      |
| 67 - 79     | 1467.5536 | 1466.5463 | 1466.6525 | -0.1062 | 0 K.LGVFEDETTADDR.K  |
| 67 - 80     | 1595.6267 | 1594.6194 | 1594.7475 | -0.1281 | 1 K.LGVFEDETTADDRK.V |
| 98 - 107    | 1204.5091 | 1203.5018 | 1203.5884 | -0.0866 | 0 K.WDQETTLVR.E      |
| 114 - 127   | 1555.7550 | 1554.7477 | 1554.8552 | -0.1075 | 0 K.LLTLTHGTAVCTR.T  |

No match to: 1078.4533, 1186.5096

153 ) Bifunctional 3'-phosphoadenosine 5'-phosphosulfate synthetase 2

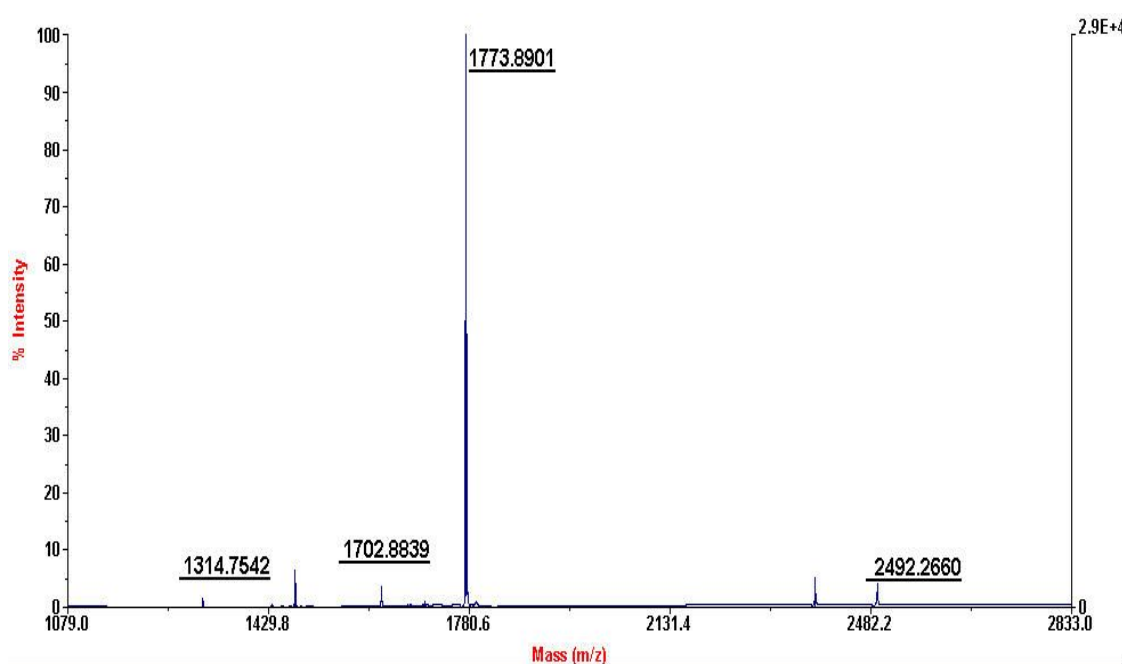

| Start - End | Observed | Mr(expt) | Mr(calc) | Delta | Miss Sequence |
|-------------|----------|----------|----------|-------|---------------|
|-------------|----------|----------|----------|-------|---------------|



|           |           |           |           |         |   |                             |
|-----------|-----------|-----------|-----------|---------|---|-----------------------------|
| 412 - 426 | 1702.8839 | 1701.8767 | 1701.8369 | 0.0398  | 0 | R.NPVHNGHALLMQDTR.R         |
| 535 - 557 | 2492.2660 | 2491.2587 | 2491.3508 | -0.0921 | 1 | K.VLSMAPGLTSVEIIPFRVAAYNK.A |

Oxidation (M)

|           |           |           |           |        |   |                      |               |
|-----------|-----------|-----------|-----------|--------|---|----------------------|---------------|
| 570 - 582 | 2492.2660 | 1624.8918 | 1624.7416 | 0.1502 | 1 | R.HNEFDFIGSTRMR.K    | Oxidation (M) |
| 587 - 602 | 1773.8901 | 1772.8828 | 1772.8192 | 0.0636 | 1 | R.EGENPPDGFMAPKAWK.V |               |
| 600 - 609 | 1314.7542 | 1313.7469 | 1313.6768 | 0.0701 | 1 | K.AWKVLTDYYR.S       |               |

No match to: 1434.7780

154 ) Histidine triad nucleotide-binding protein 1

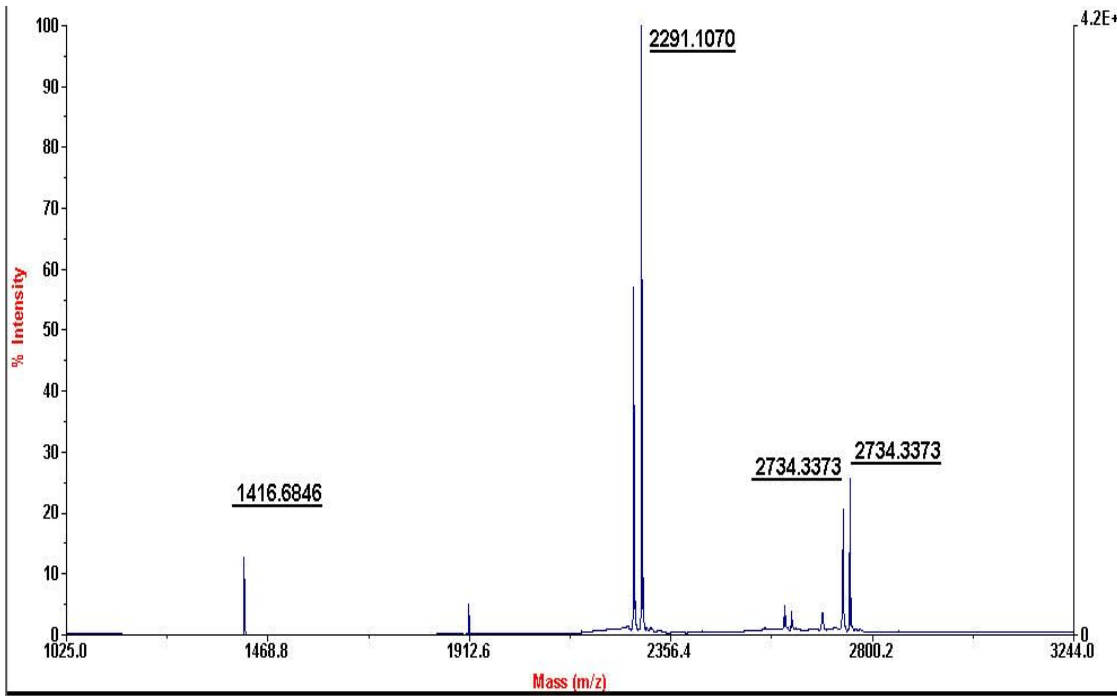

| Start - End | Observed  | Mr(expt)  | Mr(calc)  | Delta   | Miss Sequence                   |
|-------------|-----------|-----------|-----------|---------|---------------------------------|
| 8 - 21      | 1416.6846 | 1415.6773 | 1415.7521 | -0.0748 | 0 K.AQVARPGDITFGK.I             |
| 31 - 37     | 907.4288  | 906.4215  | 906.4447  | -0.0232 | 0 K.IIFEDDR.C                   |
| 38 - 57     | 2291.1070 | 2290.0998 | 2290.1933 | -0.0935 | 0 R.CLAFHDISPQAPTHFLVIPK.K      |
| 59 - 83     | 2734.3373 | 2733.3300 | 2733.4007 | -0.0707 | 1 K.HISQISVAEDDDESLLGHLMIVGKK.C |
| 59 - 83     | 2750.3017 | 2749.2944 | 2749.3956 | -0.1012 | 1                               |

K.HISQISVAEDDDESLLGHLMIVGKK.C Oxidation (M)

No match to: 1910.8632, 2274.0976, 2313.0702, 2329.0537, 2621.1316

155 ) Ubiquitin-conjugating enzyme E2 N

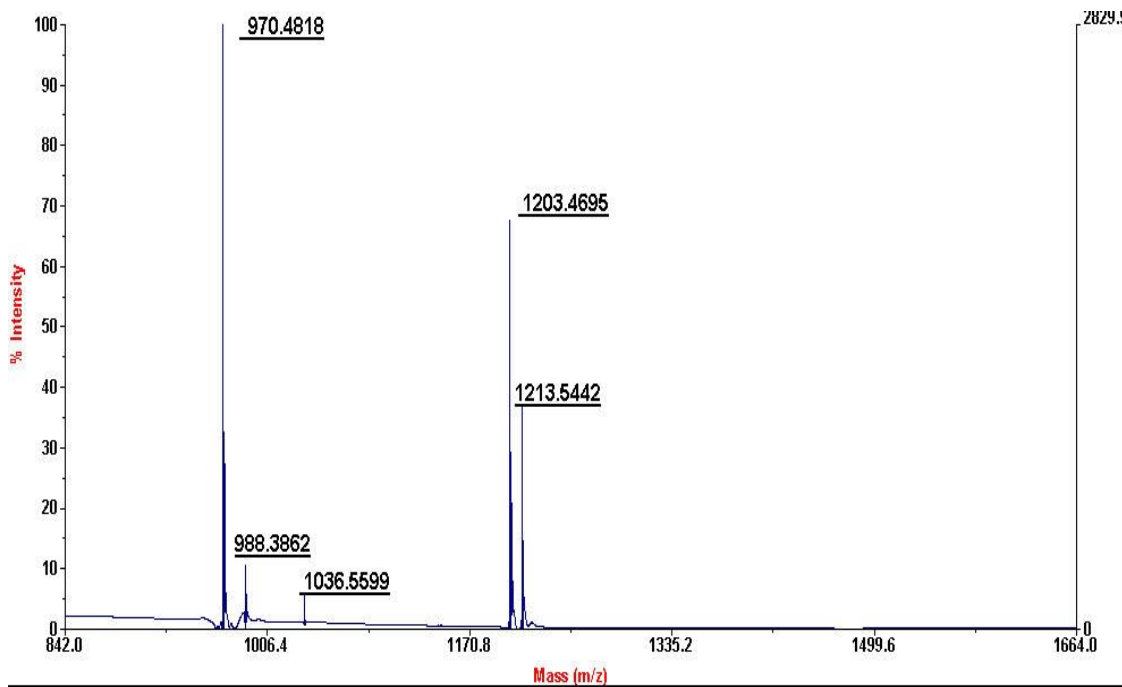

| Start - End | Observed  | Mr(expt)  | Mr(calc)  | Delta   | Miss Sequence     |
|-------------|-----------|-----------|-----------|---------|-------------------|
| 15 - 24     | 1036.5599 | 1035.5527 | 1035.6328 | -0.0801 | 0 R.LLAEPVPGIK.A  |
| 25 - 33     | 988.3862  | 987.3789  | 987.4257  | -0.0468 | 0 K.AEPDESNA.R.Y  |
| 93 - 102    | 1213.5442 | 1212.5369 | 1212.6615 | -0.1246 | 1 K.DKWSPALQIR.T  |
| 95 - 102    | 970.4818  | 969.4745  | 969.5396  | -0.0651 | 0 K.WSPALQIR.T    |
| 131 - 141   | 1203.4695 | 1202.4622 | 1202.5891 | -0.1269 | 0 K.TNEAQAIETAR.A |

No match to: 984.3671, 1747.6849, 1763.6197, 2195.7463, 2209.8172

156 ) Tubulin-specific chaperone A

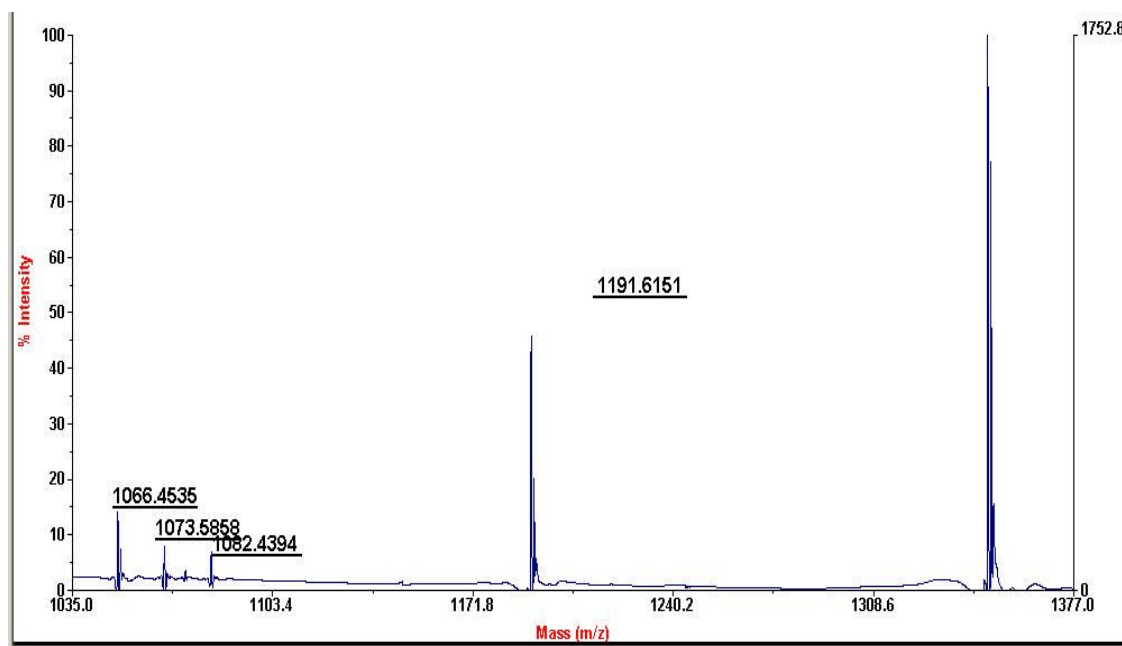

| Start - End | Observed | Mr(expt) | Mr(calc) | Delta | Miss Sequence |
|-------------|----------|----------|----------|-------|---------------|
|-------------|----------|----------|----------|-------|---------------|

|         |           |           |           |         |   |                                |
|---------|-----------|-----------|-----------|---------|---|--------------------------------|
| 53 - 61 | 1073.5858 | 1072.5785 | 1072.5513 | 0.0273  | 0 | K.QAEILQESR.M                  |
| 62 - 69 | 1050.4906 | 1049.4833 | 1049.4456 | 0.0377  | 0 | R.MMIPDCQR.R                   |
| 62 - 69 | 1066.4535 | 1065.4462 | 1065.4406 | 0.0057  | 0 | R.MMIPDCQR.R ; Oxidation (M)   |
| 62 - 69 | 1082.4394 | 1081.4321 | 1081.4355 | -0.0034 | 0 | R.MMIPDCQR.R ; 2 Oxidation (M) |
| 70 - 80 | 1347.7146 | 1346.7073 | 1346.7306 | -0.0233 | 1 | R.RLEAAYLDLQR.I                |
| 71 - 80 | 1191.6151 | 1190.6079 | 1190.6295 | -0.0216 | 0 | R.LEAAYLDLQR.I                 |

No match to: 2207.9777

157 ) Myosin regulatory light chain 2

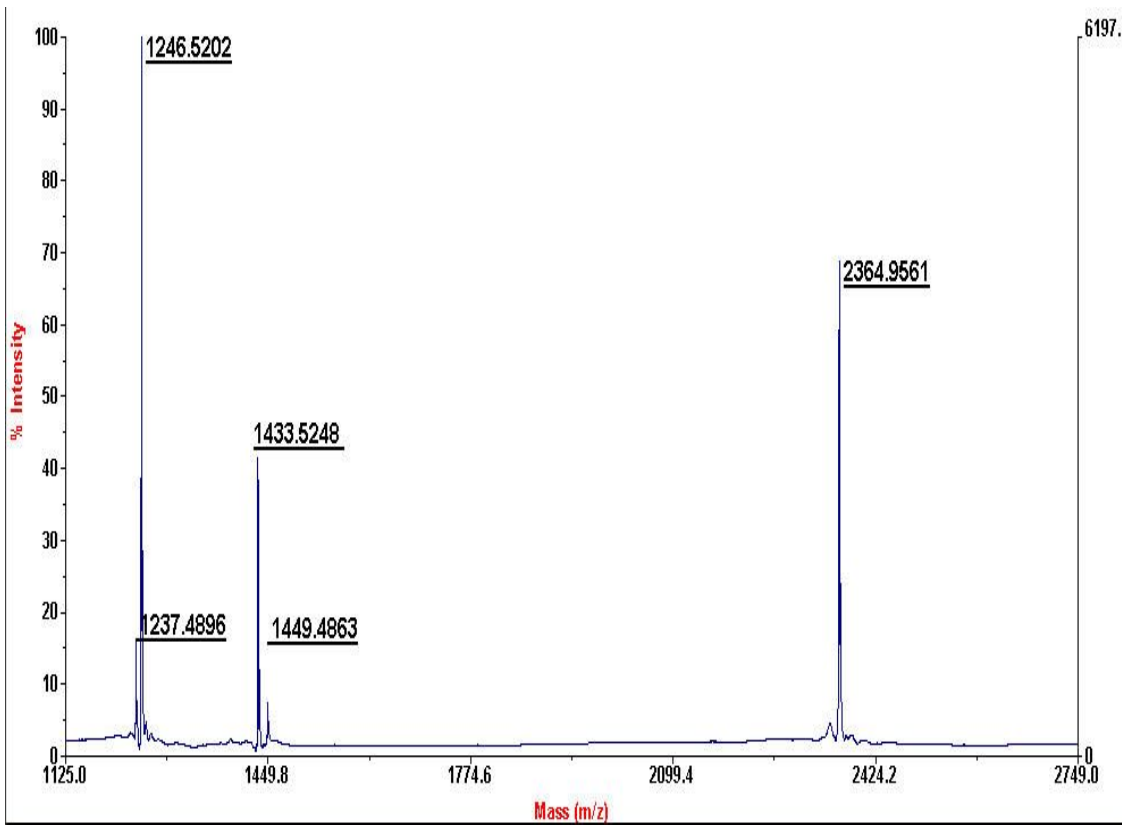

| Start - End | Observed  | Mr(expt)  | Mr(calc)  | Delta   | Miss | Sequence                      |
|-------------|-----------|-----------|-----------|---------|------|-------------------------------|
| 36 - 45     | 1237.4896 | 1236.4823 | 1236.5557 | -0.0734 | 0    | K.EAFNMIDQNR.D                |
| 105 - 124   | 2364.9561 | 2363.9488 | 2364.0229 | -0.0741 | 0    | R.NAFACFDEEASGFIHEDHLR.E      |
| 134 - 144   | 1433.5248 | 1432.5175 | 1432.5817 | -0.0641 | 0    | R.FTDEEVDEMYR.E               |
| 134 - 144   | 1449.4863 | 1448.4790 | 1448.5766 | -0.0976 | 0    | R.FTDEEVDEMYR.E Oxidation (M) |
| 152 - 161   | 1246.5202 | 1245.5129 | 1245.5778 | -0.0649 | 0    | K.GNFNYVEFTR.I                |

158 ) Cytochrome b5

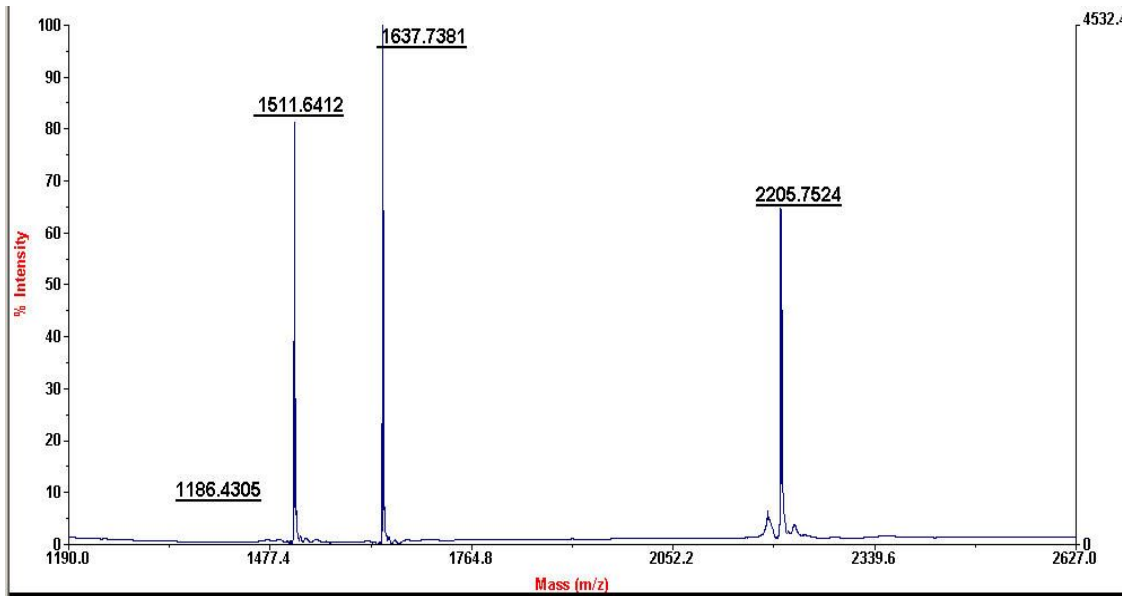

| Start - End | Observed  | Mr(expt)  | Mr(calc)  | Delta   | Miss Sequence               |
|-------------|-----------|-----------|-----------|---------|-----------------------------|
| 11 - 19     | 1186.4305 | 1185.4232 | 1185.5917 | -0.1685 | 0 K.YYTLEEIQK.H             |
| 40 - 52     | 1511.6412 | 1510.6339 | 1510.7416 | -0.1077 | 0 K.FLEEHPGGEEVLR.E         |
| 53 - 73     | 2205.7524 | 2204.7451 | 2204.9207 | -0.1755 | 0 R.EQAGGDATENFEDVGHSTDAR.E |
| 78 - 91     | 1637.7381 | 1636.7308 | 1636.8573 | -0.1265 | 0 K.TFIIGELHPDDRPK.L        |

No match to: 2185.8781, 2189.7801, 2223.8476

159 ) Nucleoside diphosphate kinase A

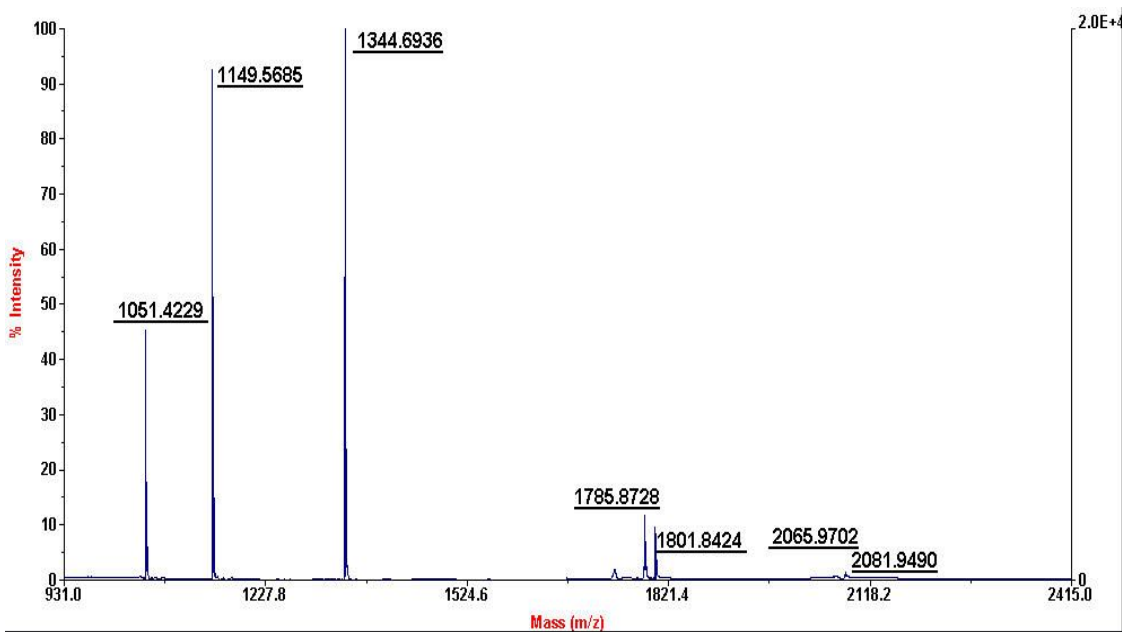

| Start - End | Observed  | Mr(expt)  | Mr(calc)  | Delta   | Miss Sequence           |
|-------------|-----------|-----------|-----------|---------|-------------------------|
| 7 - 18      | 1344.6936 | 1343.6864 | 1343.7561 | -0.0698 | 0 R.TFIAIKPDGVQR.G      |
| 40 - 56     | 2065.9702 | 2064.9629 | 2065.0190 | -0.0561 | 1 K.FMQASEDLLKEHYVDLK.D |

40 - 56 2081.9490 2080.9417 2081.0139 -0.0722 1 K.FMQASEDLLKEHYVDLK.D

Oxidation (M)

57 - 66 1149.5685 1148.5612 1148.6342 -0.0731 0 K.DRPFFAGLVK.Y

89 - 105 1785.8728 1784.8655 1784.9091 -0.0436 0 R.VMLGETNPADSKPGTIR.G

89 - 105 1801.8424 1800.8352 1800.9040 -0.0688 0 R.VMLGETNPADSKPGTIR.G

Oxidation (M)

106 - 114 1051.4229 1050.4156 1050.4917 -0.0761 0 R.GDFCIQVGR.N

160 ) Epididymal secretory protein E1 precursor

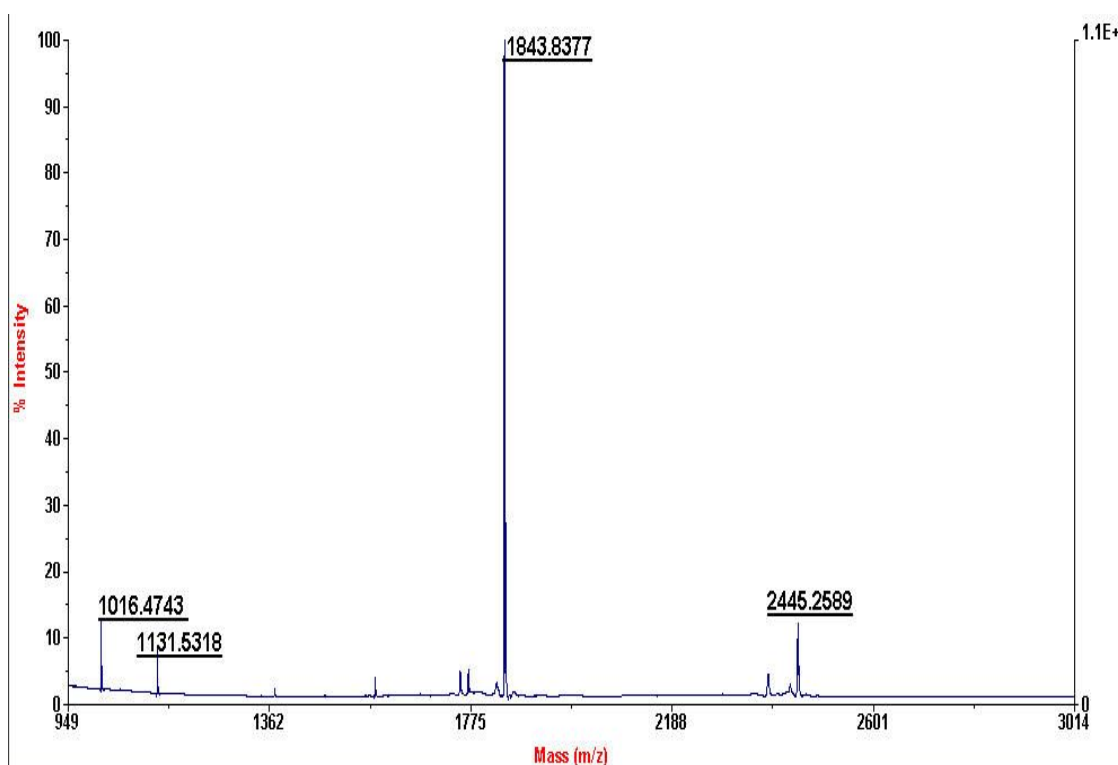

| Start - End | Observed  | Mr(expt)  | Mr(calc)  | Delta   | Miss Sequence                 |
|-------------|-----------|-----------|-----------|---------|-------------------------------|
| 36 - 51     | 1843.8377 | 1842.8304 | 1842.8604 | -0.0300 | 0 K.EVNVSPCPTQPCQLSK.G 2      |
| 72 - 94     | 2445.2589 | 2444.2516 | 2444.2596 | -0.0081 | 0 K.AVVHILMGVVPFPIPEPDGCK.S ; |

Oxidation (M)

95 - 103 1016.4743 1015.4671 1015.5121 -0.0450 0 K.SGINCPIQK.D

104 - 112 1131.5318 1130.5245 1130.5608 -0.0363 1 K.DKTYSYLNK.L

No match to: 1578.7361, 1752.8107, 1826.7324

161 ) Cofilin-1

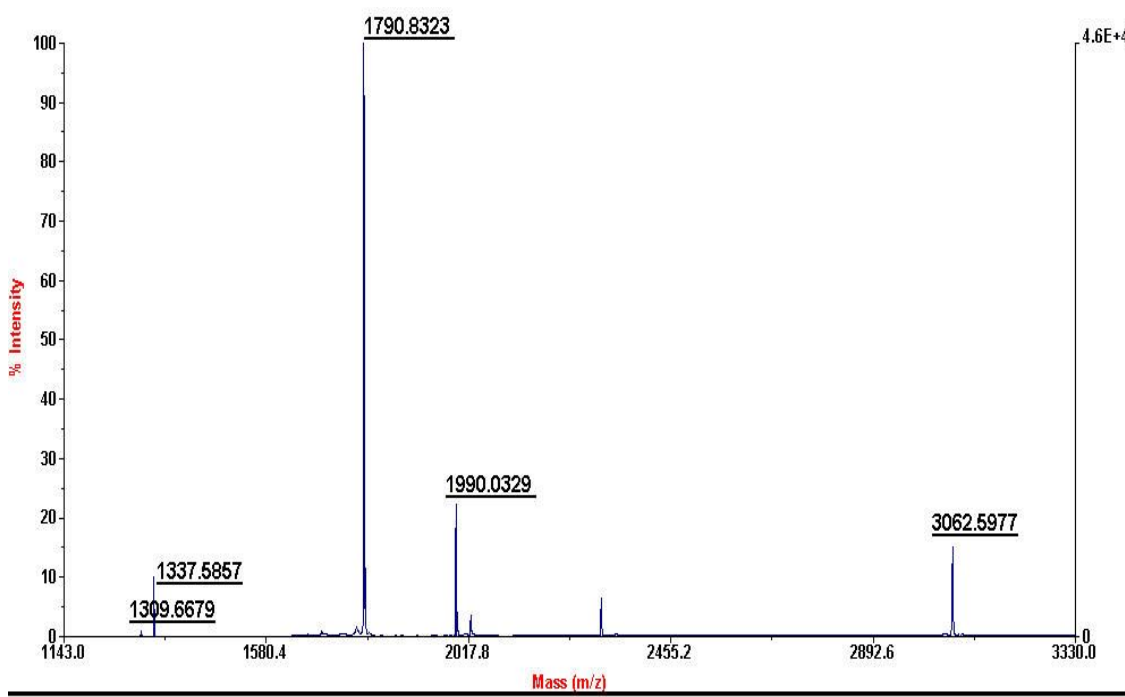

| Start - End                             | Observed  | Mr(expt)  | Mr(calc)  | Delta   | Miss Sequence           |
|-----------------------------------------|-----------|-----------|-----------|---------|-------------------------|
| 35 - 45                                 | 1309.6679 | 1308.6606 | 1308.6748 | -0.0142 | 1 K.AVLFLCSEDKK.N       |
| 46 - 73                                 | 3062.5977 | 3061.5905 | 3061.5860 | 0.0045  | 1                       |
| <b>K.NIILEEGKEILVGDVGQTVDDPYATFVK.M</b> |           |           |           |         |                         |
| 82 - 92                                 | 1337.5857 | 1336.5784 | 1336.6187 | -0.0403 | 0 R.YALYDATYETK.E       |
| 96 - 112                                | 1990.0329 | 1989.0256 | 1989.0611 | -0.0355 | 1 K.KEDLVFIFWAPESAPLK.S |
| 133 - 146                               | 1790.8323 | 1789.8250 | 1789.8053 | 0.0197  | 1 K.HELQANCYEEVKDR.C    |

No match to: 1026.5439, 1774.6063, 2022.0340, 2303.1671

162 ) Phosphatidylethanolamine-binding protein 1

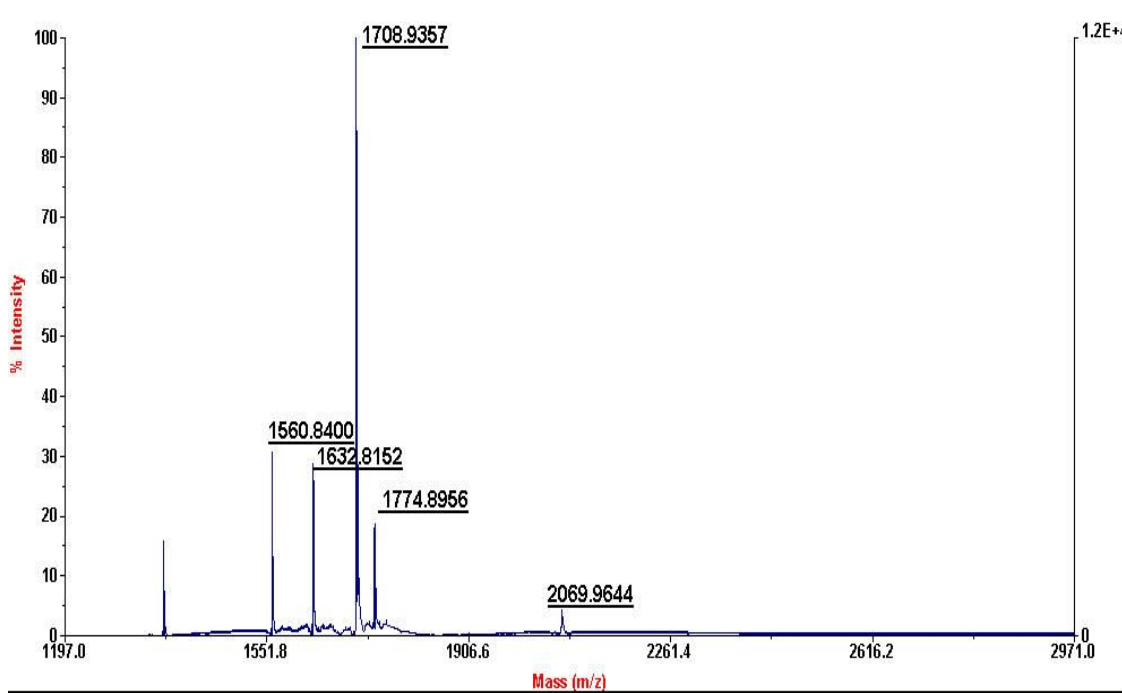

| Start - End                               | Observed  | Mr(expt)  | Mr(calc)  | Delta  | Miss Sequence                |
|-------------------------------------------|-----------|-----------|-----------|--------|------------------------------|
| 8 - 39                                    | 3471.8596 | 3470.8523 | 3470.7106 | 0.1417 | 0                            |
| <b>K.WSGPLSLQEVDQPHLHVITYAGAAVDELGK.V</b> |           |           |           |        |                              |
| 48 - 62                                   | 1632.8152 | 1631.8080 | 1631.7903 | 0.0176 | 0 K.NRPTSISWDGLDSGK.L        |
| 63 - 76                                   | 1560.8400 | 1559.8327 | 1559.8195 | 0.0132 | 0 K.LYTLVLTDPDAPSR.K         |
| 81 - 93                                   | 1774.8956 | 1773.8883 | 1773.8773 | 0.0110 | 1 K.YREWHHFLVVMK.G Oxidation |
| <b>(M)</b>                                |           |           |           |        |                              |
| 120 - 132                                 | 1708.9357 | 1707.9284 | 1707.8984 | 0.0300 | 0 R.YVWLVYEQRPLK.C           |
| 162 - 179                                 | 2069.9644 | 2068.9571 | 2068.9200 | 0.0371 | 0 R.APVAGTCYQAEWDDYVPK.L     |

No match to: 1370.6873, 1740.9123

163 ) Alpha crystallin B chain

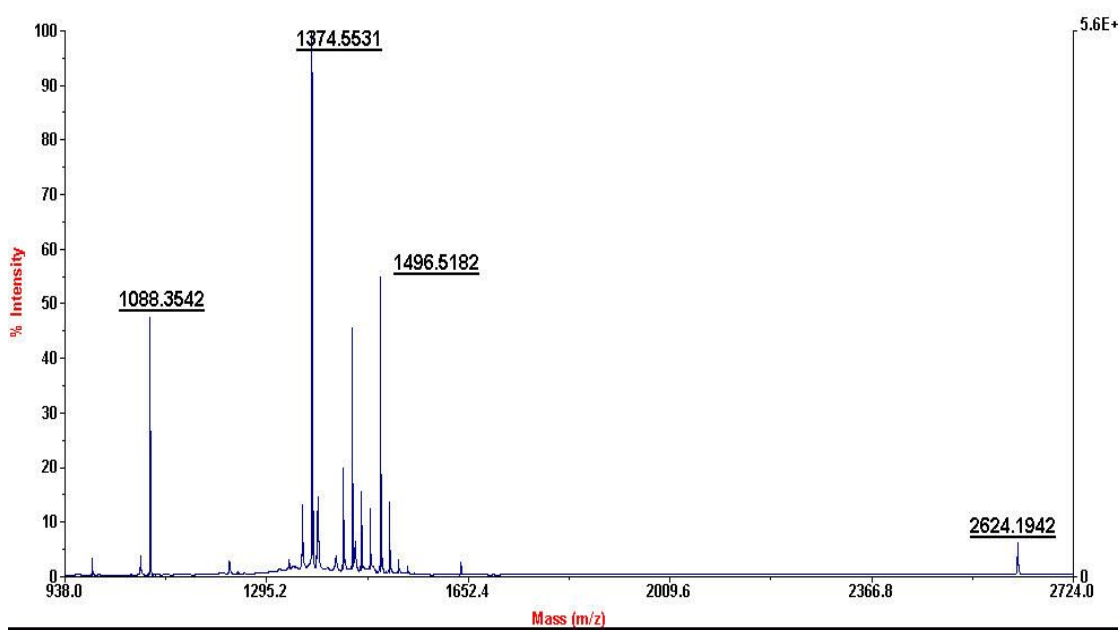

| Start - End | Observed  | Mr(expt)  | Mr(calc)  | Delta   | Miss Sequence                    |
|-------------|-----------|-----------|-----------|---------|----------------------------------|
| 12 - 22     | 1374.5531 | 1373.5459 | 1373.6993 | -0.1534 | 0 R.RPFFPFHSPSR.L                |
| 57 - 69     | 1496.5182 | 1495.5109 | 1495.6766 | -0.1656 | 0 R.APSWFDTGLSEMR.L              |
| 108 - 116   | 1088.3542 | 1087.3470 | 1087.5047 | -0.1577 | 0 R.QDEHGFISR.E                  |
| 124 - 149   | 2624.1942 | 2623.1869 | 2623.3705 | -0.1836 | 0 R.IPADVDPLTITSSLSSDGVLTVNGPR.K |

No match to: 1386.7695, 1430.5848, 1446.5445, 1462.5765, 1478.5436, 1512.4561

164 ) Superoxide dismutase [Mn]

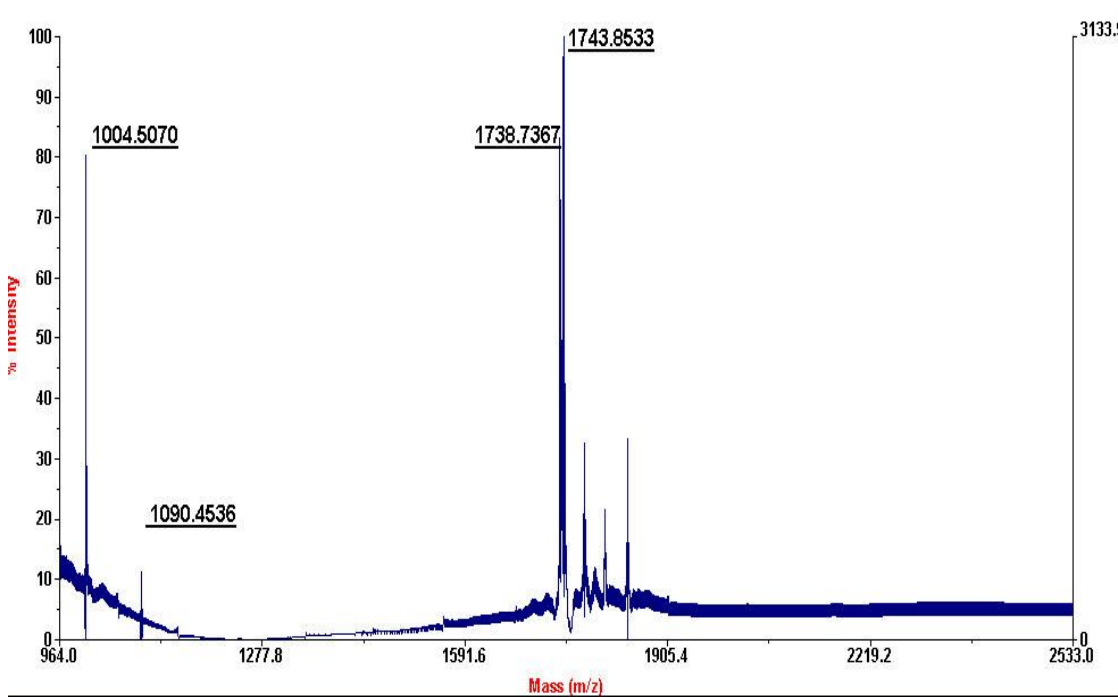

| Start - End | Observed | Mr(expt) | Mr(calc) | Delta | Miss Sequence |
|-------------|----------|----------|----------|-------|---------------|
|-------------|----------|----------|----------|-------|---------------|



|           |           |           |           |         |   |                     |
|-----------|-----------|-----------|-----------|---------|---|---------------------|
| 54 - 68   | 1738.7367 | 1737.7295 | 1737.8434 | -0.1140 | 0 | K.HHAAYVNNLNVTEEK.Y |
| 124 - 132 | 1090.4536 | 1089.4463 | 1089.5131 | -0.0668 | 1 | R.DFGSFDKFK.E       |
| 195 - 202 | 1004.5070 | 1003.4998 | 1003.5451 | -0.0453 | 0 | K.NVRPDYLK.A        |
| 203 - 216 | 1743.8533 | 1742.8460 | 1742.8740 | -0.0280 | 0 | K.AIWNVINWENVTER.Y  |

No match to: 1775.8370, 1807.8601, 1842.7914

165 ) Adenine phosphoribosyltransferase

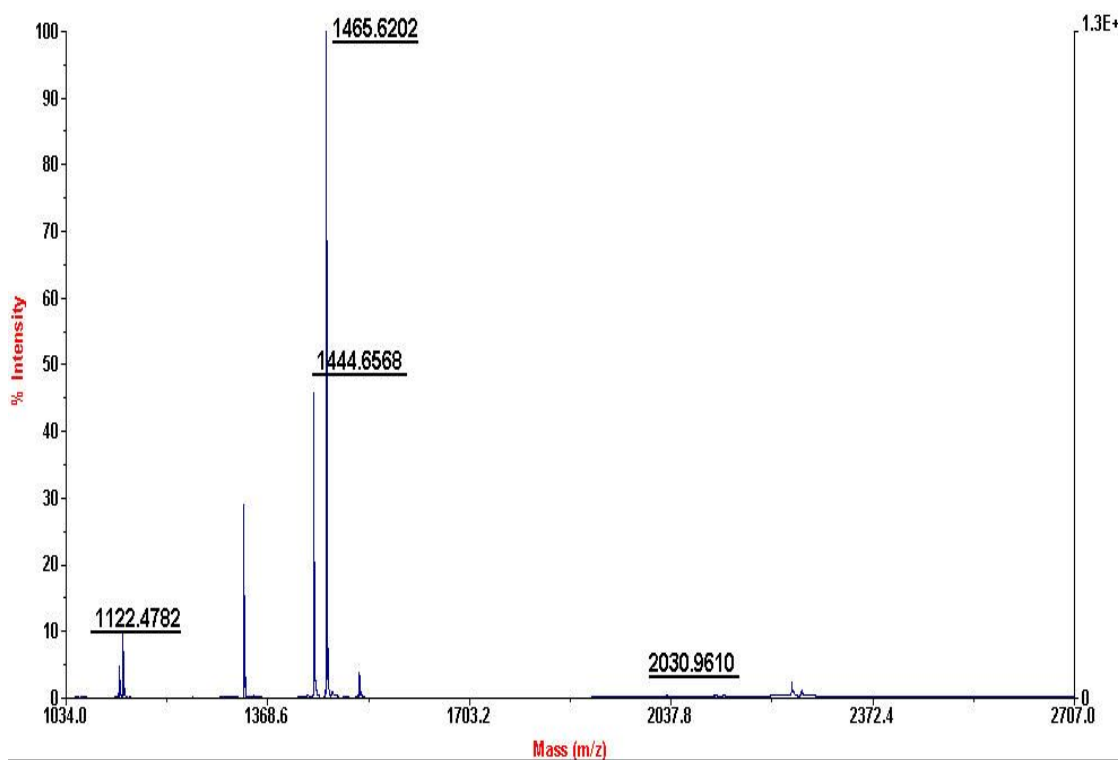

| Start - End | Observed  | Mr(expt)  | Mr(calc)  | Delta   | Miss Sequence            |
|-------------|-----------|-----------|-----------|---------|--------------------------|
| 15 - 27     | 1465.6202 | 1464.6129 | 1464.7402 | -0.1272 | 0 R.SFPDFPTPGVVFR.D      |
| 28 - 40     | 1444.6568 | 1443.6496 | 1443.7722 | -0.1226 | 1 R.DISPVLKDPASFR.A      |
| 58 - 67     | 1122.4782 | 1121.4709 | 1121.5717 | -0.1008 | 0 R.IDYIAGLDSR.G         |
| 146 - 163   | 2030.9610 | 2029.9537 | 2030.0969 | -0.1432 | 0 R.LQAEVLECVSLVELTSLK.G |

No match to: 1329.5559, 2237.9236, 2389.9583

166 ) Calcyphosin

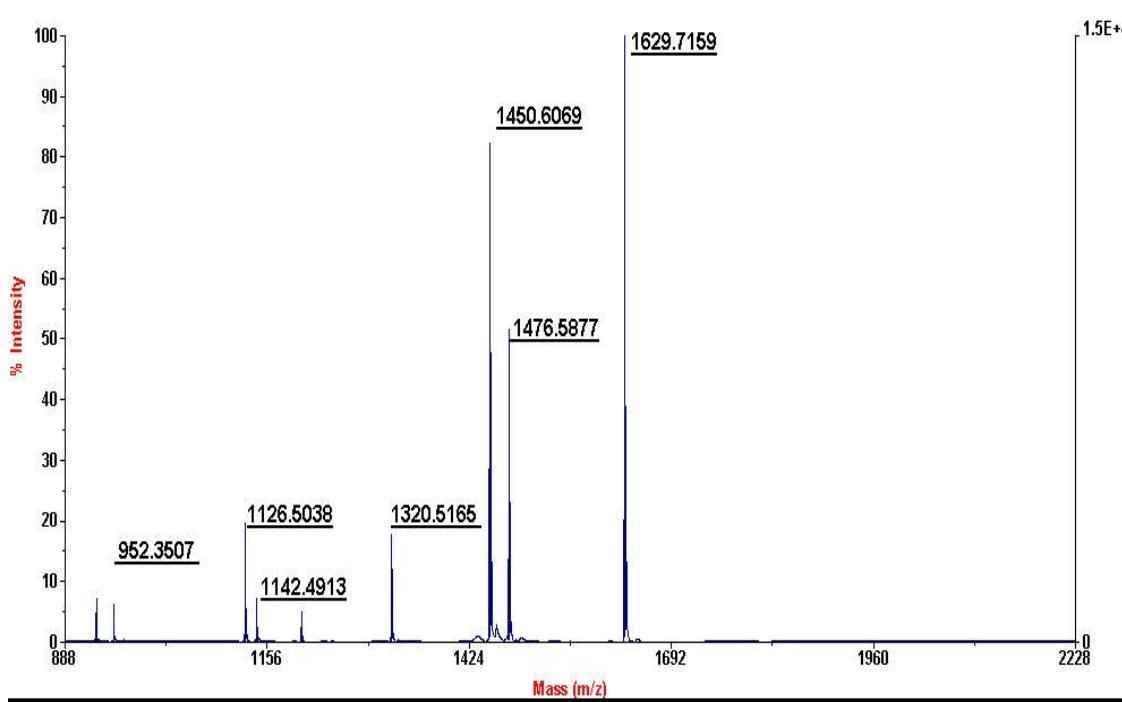

| Start - End | Observed  | Mr(expt)  | Mr(calc)  | Delta   | Miss Sequence                    |
|-------------|-----------|-----------|-----------|---------|----------------------------------|
| 1 - 10      | 1126.5038 | 1125.4965 | 1125.4682 | 0.0283  | 0 -.MDAVDATMEK.L Oxidation (M)   |
| 1 - 10      | 1142.4913 | 1141.4840 | 1141.4631 | 0.0209  | 0 -.MDAVDATMEK.L 2 Oxidation (M) |
| 40 - 47     | 952.3507  | 951.3434  | 951.4298  | -0.0863 | 0 R.SLDAEFR.Q                    |
| 53 - 67     | 1629.7159 | 1628.7086 | 1628.8192 | -0.1106 | 0 K.LGLVLDQAEAGVCR.K             |
| 72 - 84     | 1450.6069 | 1449.5996 | 1449.7100 | -0.1103 | 0 R.NGSGTLDLEFLR.A               |
| 132 - 142   | 1320.5165 | 1319.5092 | 1319.5993 | -0.0901 | 0 R.SGEWTEDEVLR.R                |
| 132 - 143   | 1476.5877 | 1475.5804 | 1475.7005 | -0.1200 | 1 R.SGEWTEDEVLRR.F               |

No match to: 1459.4444

168 ) ARF-related protein 1

| Start - End | Observed  | Mr(expt)  | Mr(calc)  | Delta   | Miss Sequence            |
|-------------|-----------|-----------|-----------|---------|--------------------------|
| 31 - 40     | 1210.1685 | 1209.1612 | 1209.6353 | -0.4741 | 1 K.TTFLEQSKTR.F         |
| 53 - 68     | 1588.3186 | 1587.3114 | 1586.8880 | 0.4234  | 0 K.ITTTVGLNIGTVDVGK.A   |
| 53 - 70     | 1815.4120 | 1814.4048 | 1814.0262 | 0.3786  | 1 K.ITTTVGLNIGTVDVGKAR.L |
| 136 - 148   | 1460.2712 | 1459.2639 | 1459.7228 | -0.4590 | 0 K.QDVETCLSIPDIK.T      |

No match to: 1887.3421

169 ) 14 kDa phosphohistidine phosphatase

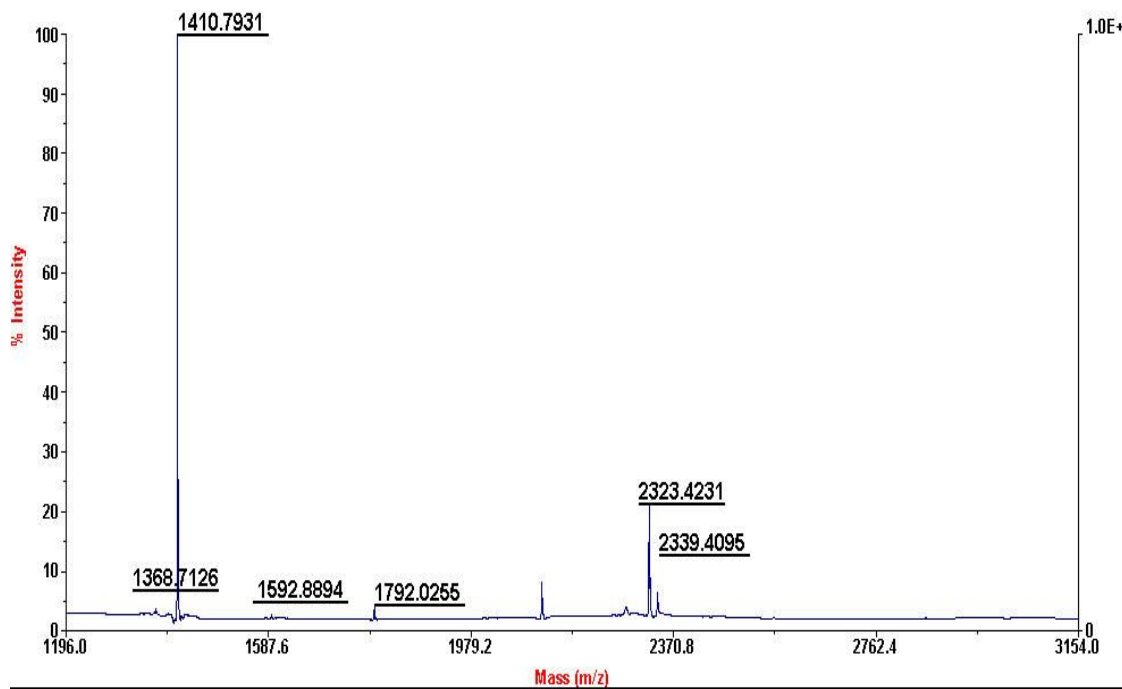

| Start - End | Observed  | Mr(expt)  | Mr(calc)  | Delta  | Miss Sequence               |
|-------------|-----------|-----------|-----------|--------|-----------------------------|
| 49 - 59     | 1410.7931 | 1409.7858 | 1409.6252 | 0.1607 | 0 K.WAEYHADIYDK.V           |
| 67 - 78     | 1368.7126 | 1367.7053 | 1367.5017 | 0.2036 | 0 K.QGCDCECLGGGR.I 3        |
| 88 - 108    | 2323.4231 | 2322.4158 | 2322.1103 | 0.3056 | 0 K.IHVYGYSMAYGPAQHAISTEK.I |
| 88 - 108    | 2339.4095 | 2338.4022 | 2338.1052 | 0.2970 | 0 K.IHVYGYSMAYGPAQHAISTEK.I |

Oxidation (M)

|           |           |           |           |        |                       |
|-----------|-----------|-----------|-----------|--------|-----------------------|
| 111 - 125 | 1792.0255 | 1791.0183 | 1790.7788 | 0.2395 | 1 K.AKYPDYEVTWANDGY.- |
| 113 - 125 | 1592.8894 | 1591.8821 | 1591.6467 | 0.2354 | 0 K.YPDYEVTWANDGY.-   |

No match to: 1351.7058, 2115.3518

170 ) Protein Wnt-5a

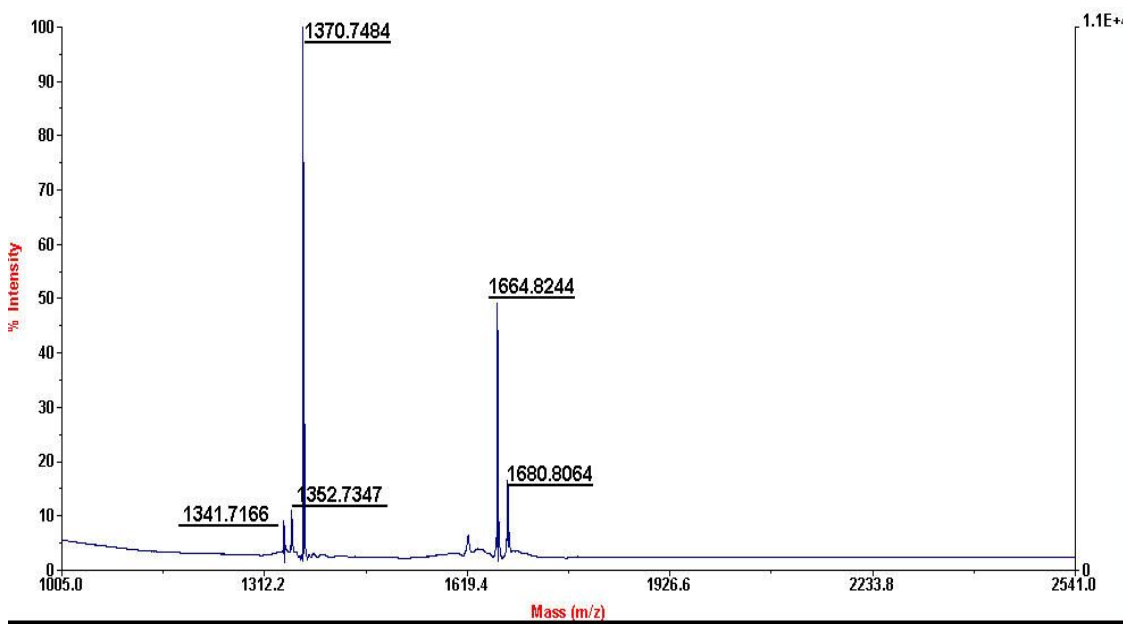

| Start - End | Observed  | Mr(expt)  | Mr(calc)  | Delta  | Miss Sequence                    |
|-------------|-----------|-----------|-----------|--------|----------------------------------|
| 213 - 224   | 1352.7347 | 1351.7274 | 1351.6918 | 0.0356 | 1 R.RTVYNLADVACK.C               |
| 255 - 266   | 1370.7484 | 1369.7412 | 1369.6408 | 0.1004 | 1 K.YDSAAAMRLNSR.G Oxidation (M) |
| 297 - 312   | 1664.8244 | 1663.8171 | 1663.7948 | 0.0223 | 1 R.NESTGSLGTQGRLCNK.T           |
| 313 - 327   | 1680.8064 | 1679.7992 | 1679.5718 | 0.2274 | 0 K.TSEGMDGCCELMCCGR.G ; 2       |

Oxidation (M)

|           |           |           |           |        |                   |
|-----------|-----------|-----------|-----------|--------|-------------------|
| 355 - 365 | 1341.7166 | 1340.7093 | 1340.6105 | 0.0988 | 0 K.CTEIVDQFVCK.- |
|-----------|-----------|-----------|-----------|--------|-------------------|

171 ) Peroxiredoxin-5, mitochondrial precursor

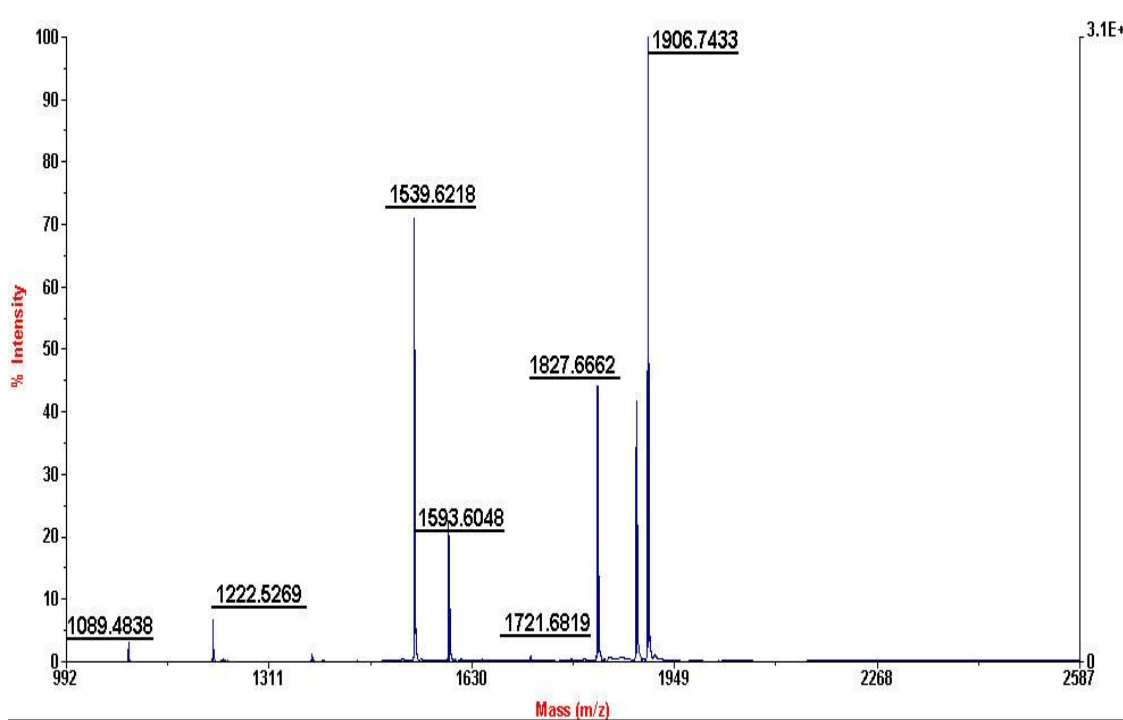

| Start - End | Observed | Mr(expt) | Mr(calc) | Delta | Miss Sequence |
|-------------|----------|----------|----------|-------|---------------|
|-------------|----------|----------|----------|-------|---------------|

|           |           |           |           |         |   |                        |
|-----------|-----------|-----------|-----------|---------|---|------------------------|
| 58 - 75   | 1827.6662 | 1826.6589 | 1826.9050 | -0.2461 | 0 | K.VGDAIPAVEVFEGEPGNK.V |
| 86 - 102  | 1721.6819 | 1720.6746 | 1720.8971 | -0.2224 | 1 | K.KGVLFVPGAFVPGCSK.T   |
| 87 - 102  | 1593.6048 | 1592.5975 | 1592.8021 | -0.2047 | 0 | K.GVLFVPGAFVPGCSK.T    |
| 103 - 116 | 1539.6218 | 1538.6145 | 1538.8093 | -0.1948 | 0 | K.THLPGFVEQAEALK.A     |
| 149 - 159 | 1089.4838 | 1088.4766 | 1088.5866 | -0.1101 | 0 | R.LLADPTGAFGK.E        |
| 160 - 176 | 1906.7433 | 1905.7360 | 1905.9684 | -0.2323 | 0 | K.ETDLLLDDSLVSIFGNR.R  |
| 181 - 191 | 1222.5269 | 1221.5197 | 1221.6428 | -0.1231 | 0 | R.FSMVVQDGIVK.A        |

No match to: 1888.7512

172 ) Myosin light polypeptide 6

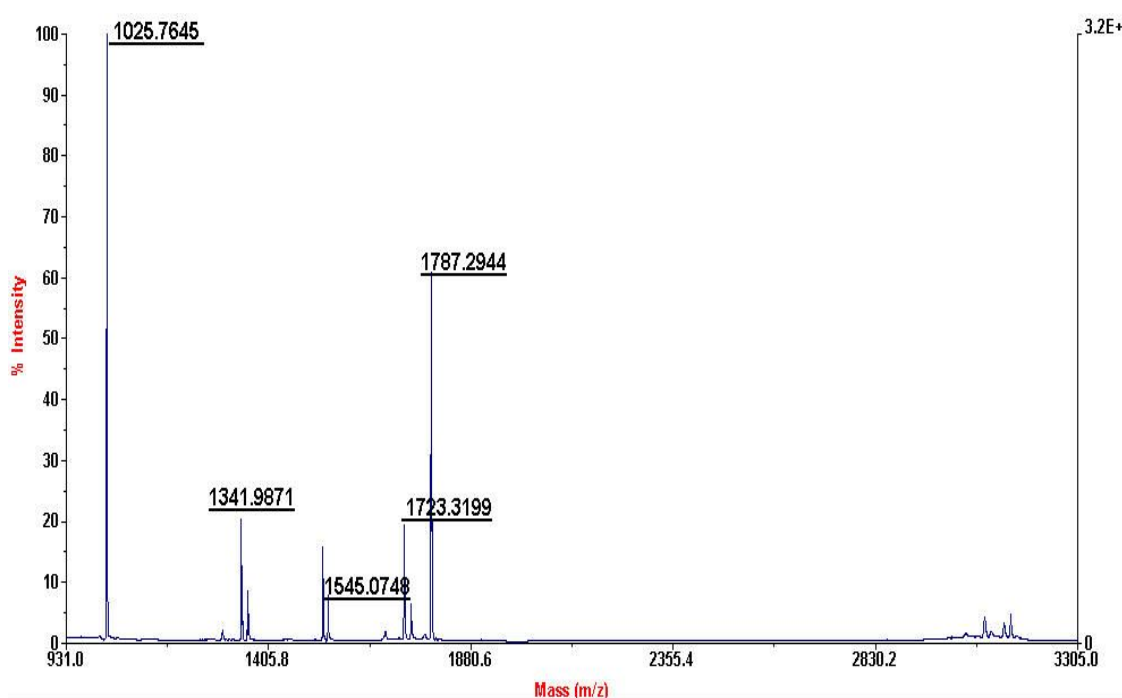

| Start - End | Observed  | Mr(expt)  | Mr(calc)  | Delta  | Miss Sequence          |
|-------------|-----------|-----------|-----------|--------|------------------------|
| 14 - 21     | 1025.7645 | 1024.7572 | 1024.4978 | 0.2594 | 0 K.EAFQLFDR.T         |
| 27 - 37     | 1341.9871 | 1340.9799 | 1340.6217 | 0.3582 | 0 K.ILYSQCGDVMR.A      |
| 80 - 94     | 1787.2944 | 1786.2872 | 1785.8169 | 0.4702 | 1 K.NKDQGTIEDYVEGLR.V  |
| 82 - 94     | 1545.0748 | 1544.0675 | 1543.6791 | 0.3885 | 0 K.DQGTIEDYVEGLR.V    |
| 95 - 110    | 1723.3199 | 1722.3126 | 1721.8407 | 0.4720 | 1 R.VFDKEGNGTVMGAEIR.H |

No match to: 1533.0106, 1724.2939

173 ) Myosin regulatory light chain 2

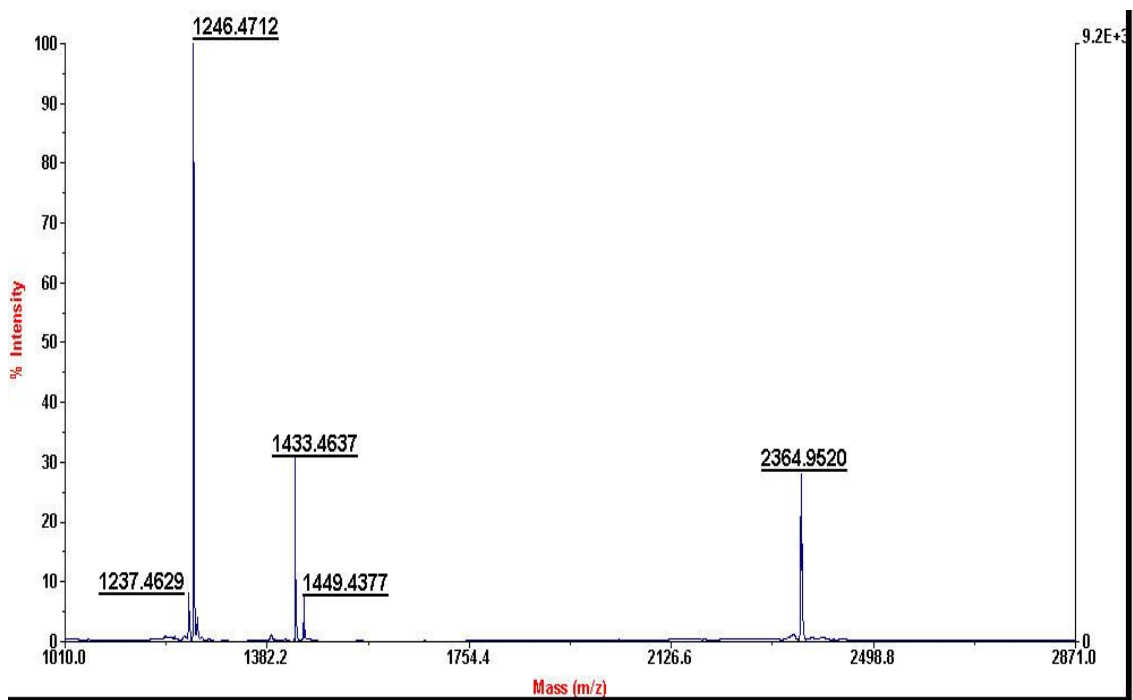

| Start - End | Observed  | Mr(expt)  | Mr(calc)  | Delta   | Miss Sequence                   |
|-------------|-----------|-----------|-----------|---------|---------------------------------|
| 36 - 45     | 1237.4629 | 1236.4556 | 1236.5557 | -0.1001 | 0 K.EAFNMIDQNR.D                |
| 105 - 124   | 2364.9520 | 2363.9447 | 2364.0229 | -0.0782 | 0 R.NAFACFDEEASGFIHEDHLR.E      |
| 134 - 144   | 1433.4637 | 1432.4564 | 1432.5817 | -0.1253 | 0 R.FTDEEVDEMYR.E               |
| 134 - 144   | 1449.4377 | 1448.4305 | 1448.5766 | -0.1461 | 0 R.FTDEEVDEMYR.E Oxidation (M) |
| 152 - 161   | 1246.4712 | 1245.4639 | 1245.5778 | -0.1140 | 0 K.GNFNYVEFTR.I                |

174) Superoxide dismutase [Cu-Zn]

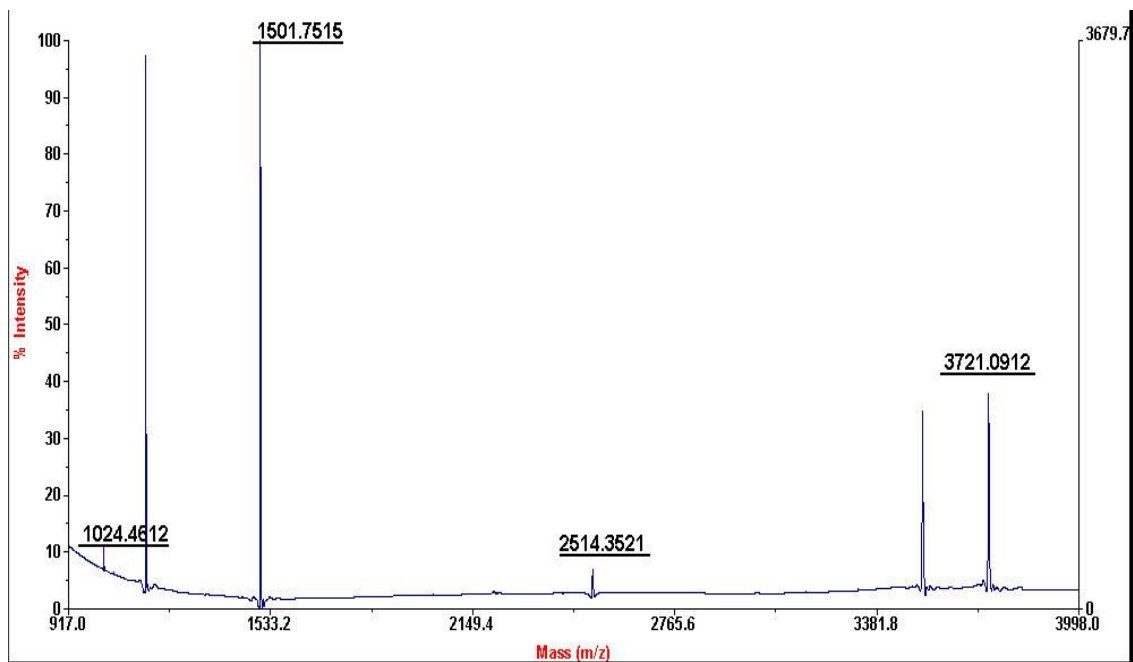

| Start - End | Observed | Mr(expt) | Mr(calc) | Delta | Miss Sequence |
|-------------|----------|----------|----------|-------|---------------|
|-------------|----------|----------|----------|-------|---------------|

|          |           |           |           |         |   |                    |
|----------|-----------|-----------|-----------|---------|---|--------------------|
| 11 - 24  | 1501.7515 | 1500.7442 | 1500.7573 | -0.0130 | 0 | K.GDGPVQGIINFEQK.E |
| 72 - 80  | 1024.4612 | 1023.4539 | 1023.4734 | -0.0194 | 1 | K.HGGPKDEER.H      |
| 81 - 116 | 3721.0912 | 3720.0839 | 3719.8061 | 0.2778  | 1 |                    |

R.HVGD LGNVTADKDG VADVSIEDSVISLSGDH CIIGR.T

|          |           |           |           |        |   |                               |
|----------|-----------|-----------|-----------|--------|---|-------------------------------|
| 93 - 116 | 2514.3521 | 2513.3449 | 2513.2068 | 0.1381 | 0 | K.DGVADVSIEDSVISLSGDH CIIGR.T |
|----------|-----------|-----------|-----------|--------|---|-------------------------------|

No match to: 1152.5752, 3518.8614, 3720.0078

175) Thioredoxin-dependent peroxide reductase

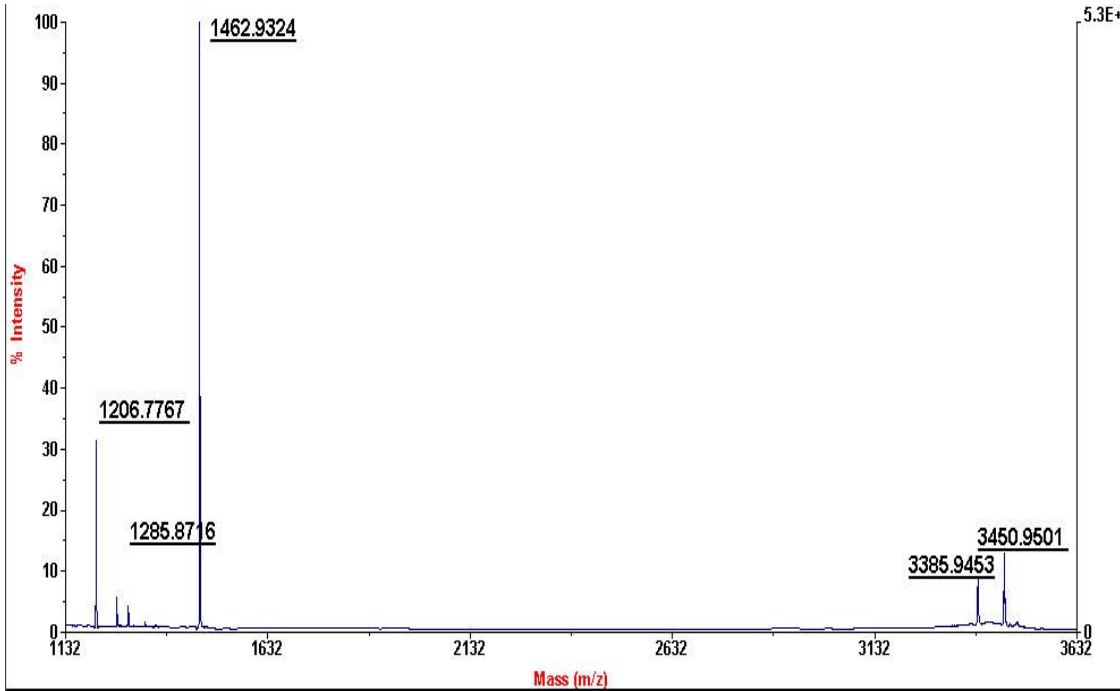

| Start - End | Observed  | Mr(expt)  | Mr(calc)  | Delta  | Miss Sequence |
|-------------|-----------|-----------|-----------|--------|---------------|
| 119 - 148   | 3450.9501 | 3449.9428 | 3449.6211 | 0.3217 | 0             |

K.ANEFH DVNCEVVA VSVDSHFSHLAWINTPR.K

|           |           |           |           |        |   |                     |
|-----------|-----------|-----------|-----------|--------|---|---------------------|
| 171 - 184 | 1462.9324 | 1461.9251 | 1461.7827 | 0.1424 | 0 | R.DYGVLLLEGSGLALR.G |
| 185 - 196 | 1285.8716 | 1284.8644 | 1284.7442 | 0.1202 | 0 | R.GLFIIDPNGVIK.H    |
| 197 - 207 | 1206.7767 | 1205.7694 | 1205.6517 | 0.1177 | 0 | K.HLSVNDLPVGR.S     |
| 218 - 248 | 3385.9453 | 3384.9380 | 3384.6085 | 0.3295 | 0 |                     |

K.AFQYVETHGEVCPANWTPDSPTIKPSPAASK.E

No match to: 1258.7503, 1329.8171

176) Abhydrolase domain-containing protein 14B

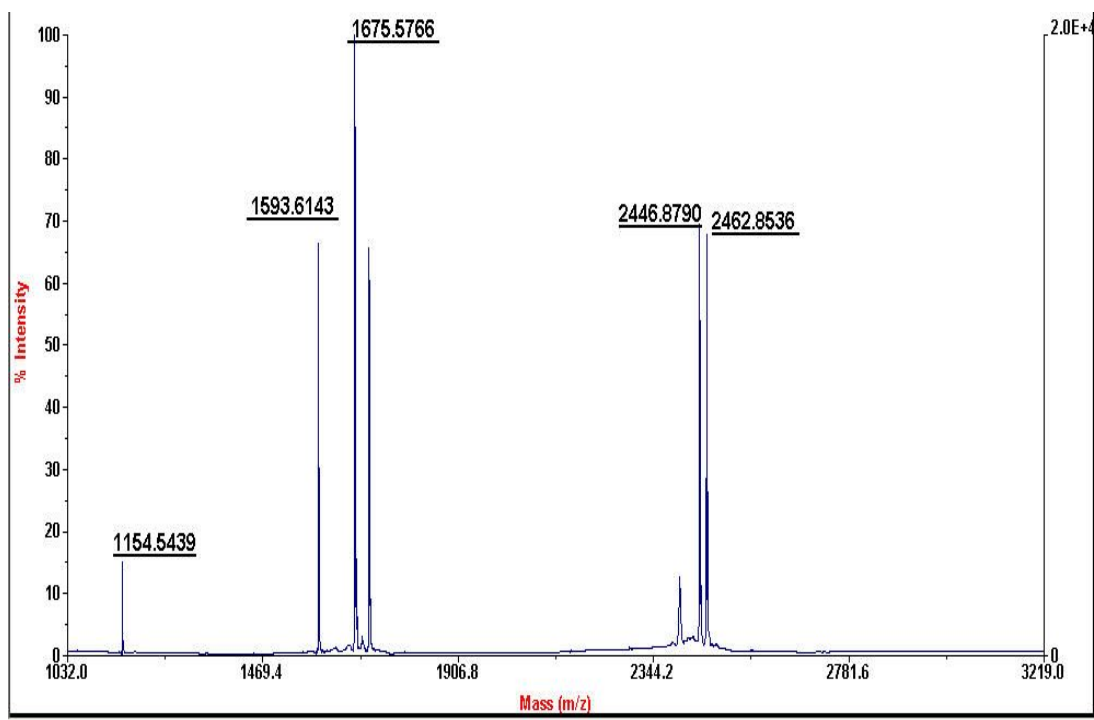

| Start - End | Observed  | Mr(expt)  | Mr(calc)  | Delta   | Miss Sequence                |
|-------------|-----------|-----------|-----------|---------|------------------------------|
| 9 - 22      | 1593.6143 | 1592.6070 | 1592.8311 | -0.2241 | 0 R.EGTIQVQGQALFFR.E         |
| 33 - 42     | 1154.5439 | 1153.5367 | 1153.6972 | -0.1605 | 0 R.FSVLLHIGIR.F             |
| 43 - 56     | 1675.5766 | 1674.5694 | 1674.8114 | -0.2421 | 0 R.FSSETWQNLGTLHR.L         |
| 152 - 173   | 2446.8790 | 2445.8717 | 2446.1839 | -0.3121 | 0 K.TPALIVYGDQDPMGQTSFEHLK.Q |
| 152 - 173   | 2462.8536 | 2461.8463 | 2462.1788 | -0.3324 | 0 K.TPALIVYGDQDPMGQTSFEHLK.Q |

Oxidation (M)

No match to: 1707.5649, 2386.9207

177 ) Transgelin



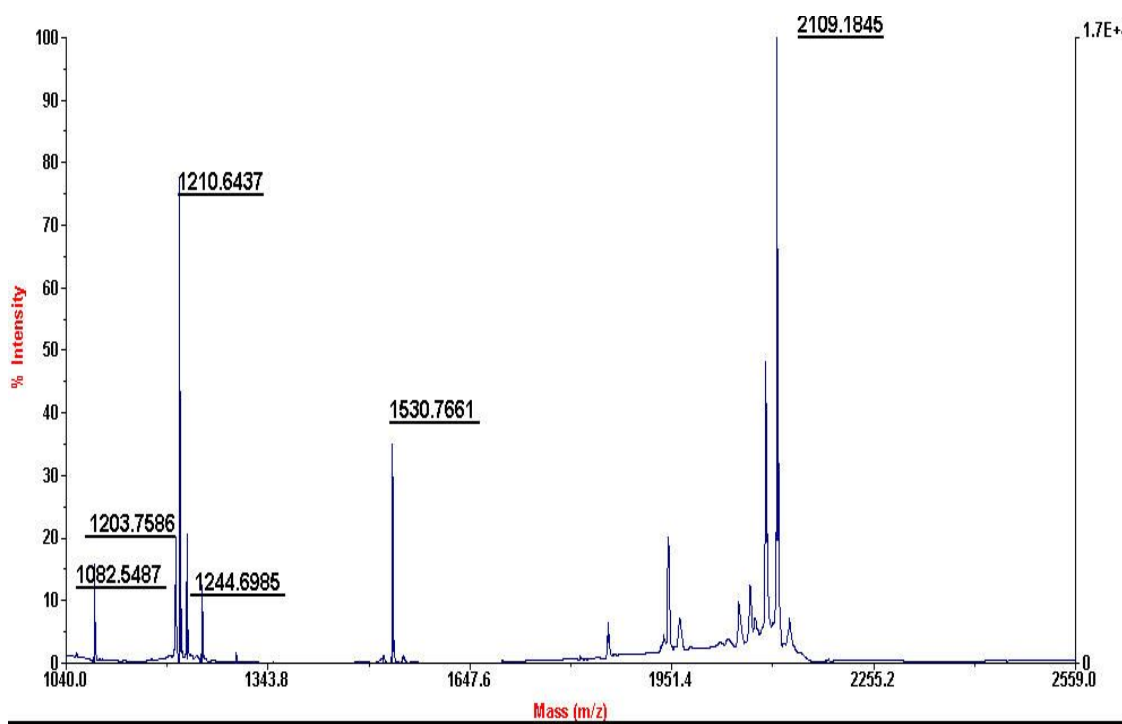

| Start - End | Observed  | Mr(expt)  | Mr(calc)  | Delta  | Miss Sequence           |
|-------------|-----------|-----------|-----------|--------|-------------------------|
| 20 - 28     | 1210.6437 | 1209.6364 | 1209.5513 | 0.0851 | 1 K.KYDEELEER.L         |
| 21 - 28     | 1082.5487 | 1081.5414 | 1081.4563 | 0.0851 | 0 K.YDEELEER.L          |
| 29 - 46     | 2109.1845 | 2108.1772 | 2108.0836 | 0.0936 | 0 R.LVEWIIQCGPDVGRPDR.G |
| 47 - 56     | 1203.7586 | 1202.7513 | 1202.6924 | 0.0590 | 1 R.GRLGFQVWLK.N        |
| 49 - 56     | 990.6340  | 989.6267  | 989.5698  | 0.0569 | 0 R.LGFQVWLK.N          |
| 78 - 88     | 1244.6985 | 1243.6912 | 1243.6270 | 0.0642 | 0 K.VPENPPSMVFK.Q       |
| 89 - 98     | 1221.6944 | 1220.6872 | 1220.6223 | 0.0649 | 0 K.QMEQVAQLK.A         |
| 108 - 120   | 1530.7661 | 1529.7588 | 1529.7072 | 0.0516 | 0 K.TDMFQTVDLFEGK.D     |
| 146 - 153   | 994.5094  | 993.5021  | 993.4378  | 0.0643 | 0 R.GDPNWFMK.K          |

No match to: 1855.0070, 2092.0008

178) Calponin-1

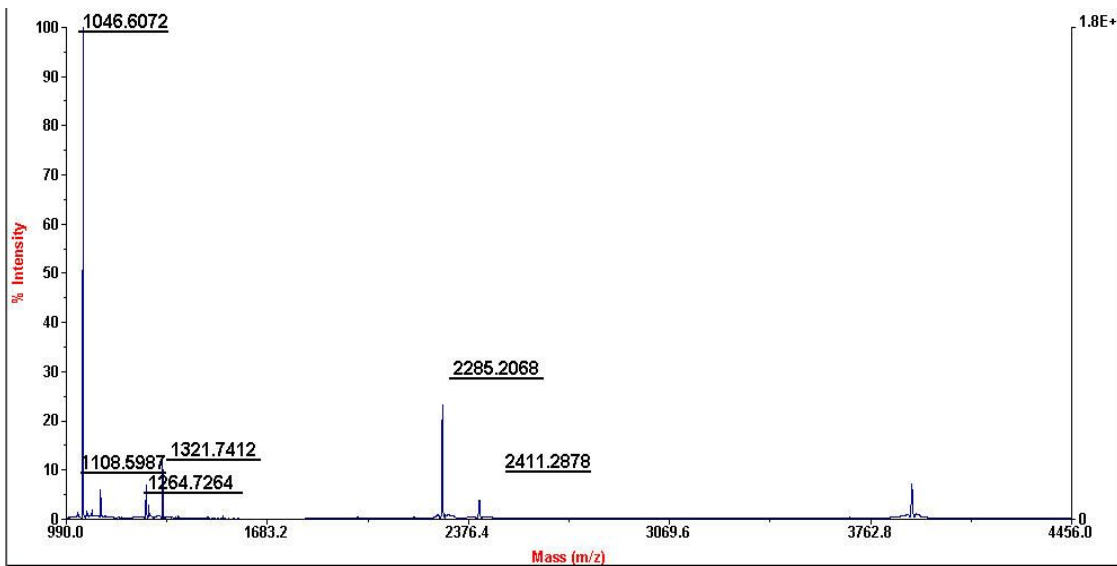

| Start - End | Observed  | Mr(expt)  | Mr(calc)  | Delta  | Miss Sequence                |
|-------------|-----------|-----------|-----------|--------|------------------------------|
| 36 - 44     | 1046.6072 | 1045.5999 | 1045.5192 | 0.0807 | 0 R.EWIEGVTGR.R              |
| 46 - 55     | 1108.5987 | 1107.5914 | 1107.5382 | 0.0532 | 0 R.IGNNFMDGLK.D             |
| 46 - 66     | 2411.2878 | 2410.2805 | 2410.2024 | 0.0781 | 1 R.IGNNFMDGLKDGII LCEFINK.L |
| 56 - 66     | 1264.7264 | 1263.7191 | 1263.6533 | 0.0659 | 0 K.DGIILCEFINK.L            |
| 56 - 66     | 1321.7412 | 1320.7339 | 1320.6747 | 0.0592 | 0 K.DGIILCEFINK.L            |
| 75 - 93     | 2285.2068 | 2284.1996 | 2284.1236 | 0.0760 | 0 K.INESTQNW HQL ENIGNFIK.A  |

No match to: 1078.6171, 1274.8056

179) Hemoglobin subunit alpha

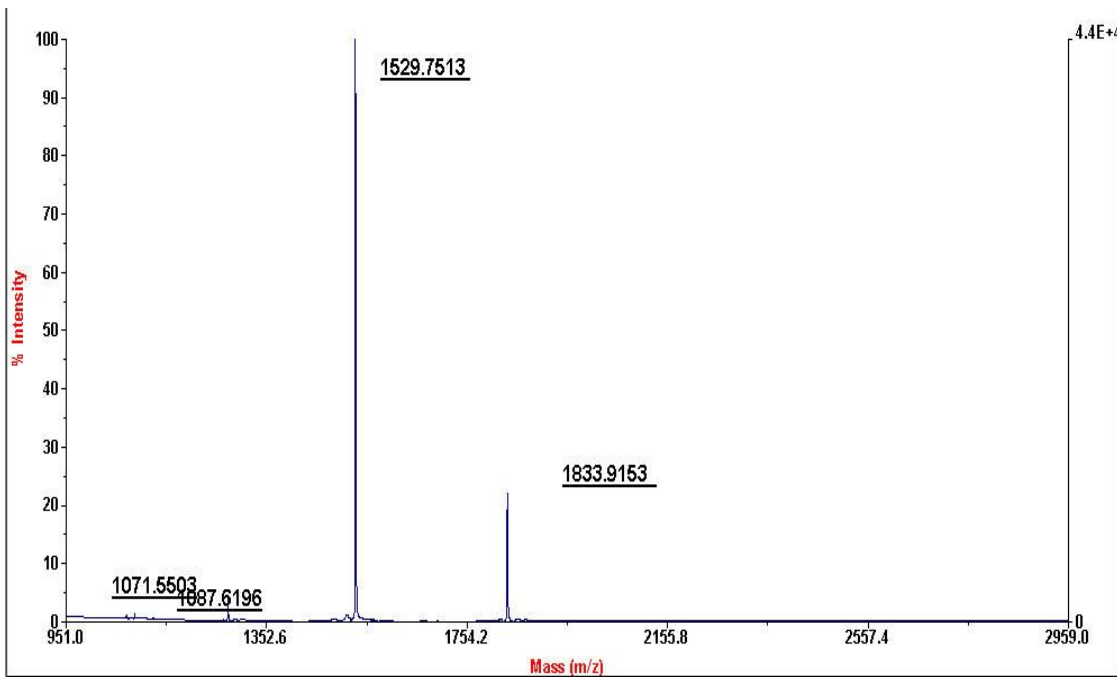

| Start - End | Observed | Mr(expt) | Mr(calc) | Delta | Miss Sequence |
|-------------|----------|----------|----------|-------|---------------|
|-------------|----------|----------|----------|-------|---------------|

|         |           |           |           |         |   |                      |
|---------|-----------|-----------|-----------|---------|---|----------------------|
| 17 - 31 | 1529.7513 | 1528.7440 | 1528.7269 | 0.0171  | 0 | K.VGAHAGEYGAEALER.M  |
| 32 - 40 | 1071.5503 | 1070.5430 | 1070.5470 | -0.0040 | 0 | R.MFLSFPTTK.T        |
| 41 - 56 | 1833.9153 | 1832.9081 | 1832.8845 | 0.0235  | 0 | K.TYFPHFDLSHGSAQVK.G |
| 91 - 99 | 1087.6196 | 1086.6123 | 1086.6185 | -0.0062 | 1 | K.LRVDPVNFK.L        |

No match to: 1274.7467, 2997.5755

180) Epididymal secretory protein E3 beta precursor

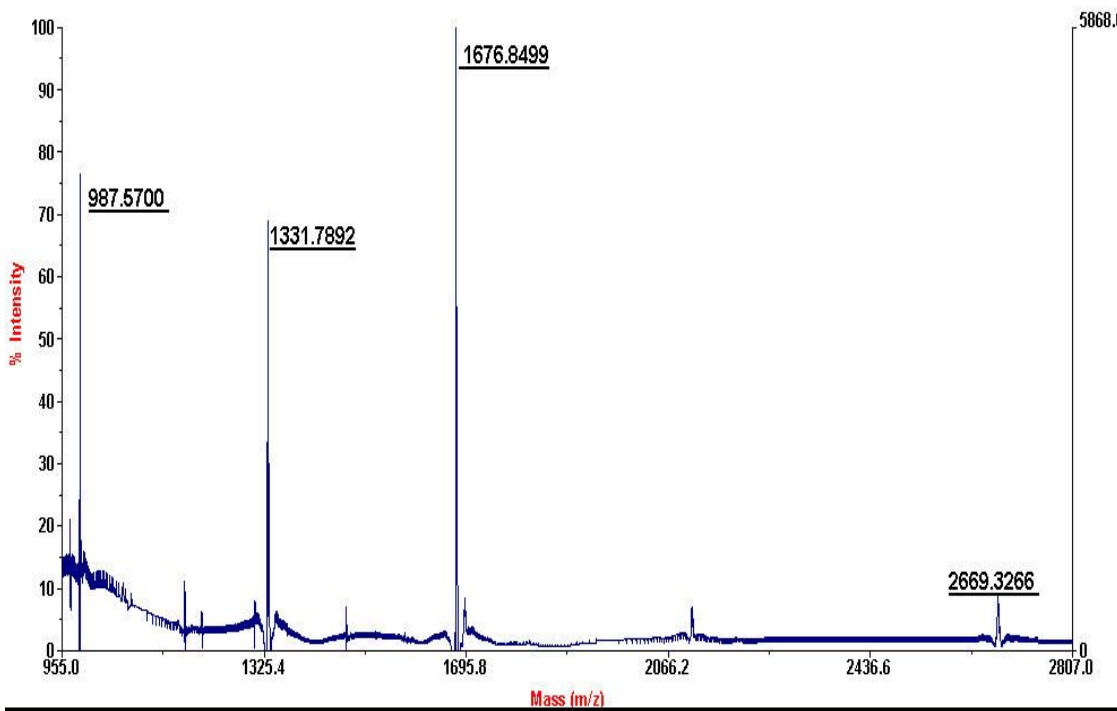

| Start - End | Observed  | Mr(expt)  | Mr(calc)  | Delta  | Miss Sequence               |
|-------------|-----------|-----------|-----------|--------|-----------------------------|
| 36 - 43     | 987.5700  | 986.5627  | 986.4934  | 0.0693 | 0 K.QHYLSPSR.E              |
| 76 - 88     | 1676.8499 | 1675.8426 | 1675.7083 | 0.1344 | 0 K.IEHICTSDNWMDR.F         |
| 91 - 101    | 1331.7892 | 1330.7819 | 1330.7033 | 0.0786 | 0 R.NAYVWVQNPLK.V           |
| 119 - 140   | 2669.3266 | 2668.3193 | 2668.1461 | 0.1733 | 0 R.SFNIEFHCSMDGYVDSIEDLK.M |

181) Cofilin-1

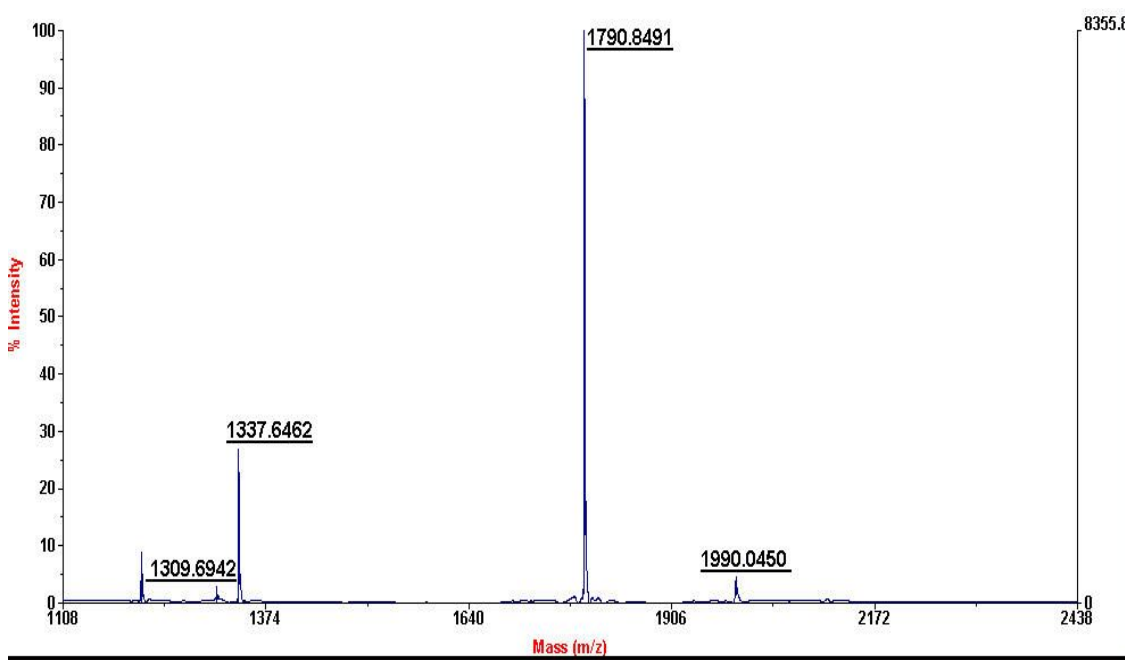

| Start - End | Observed  | Mr(expt)  | Mr(calc)  | Delta   | Miss Sequence           |
|-------------|-----------|-----------|-----------|---------|-------------------------|
| 34 - 44     | 1309.6942 | 1308.6869 | 1308.6747 | 0.0122  | 1 K.AVLFCLSEDKK.N       |
| 81 - 91     | 1337.6462 | 1336.6390 | 1336.6187 | 0.0203  | 0 R.YALYDATYETK.E       |
| 95 - 111    | 1990.0450 | 1989.0377 | 1989.0611 | -0.0234 | 1 K.KEDLVFIFWAPESAPLK.S |
| 132 - 145   | 1790.8491 | 1789.8419 | 1789.8053 | 0.0366  | 1 K.HELQANCYEEVKDR.C    |

No match to: 1210.5613, 2109.0728

182) Peptidyl-prolyl cis-trans isomerase A

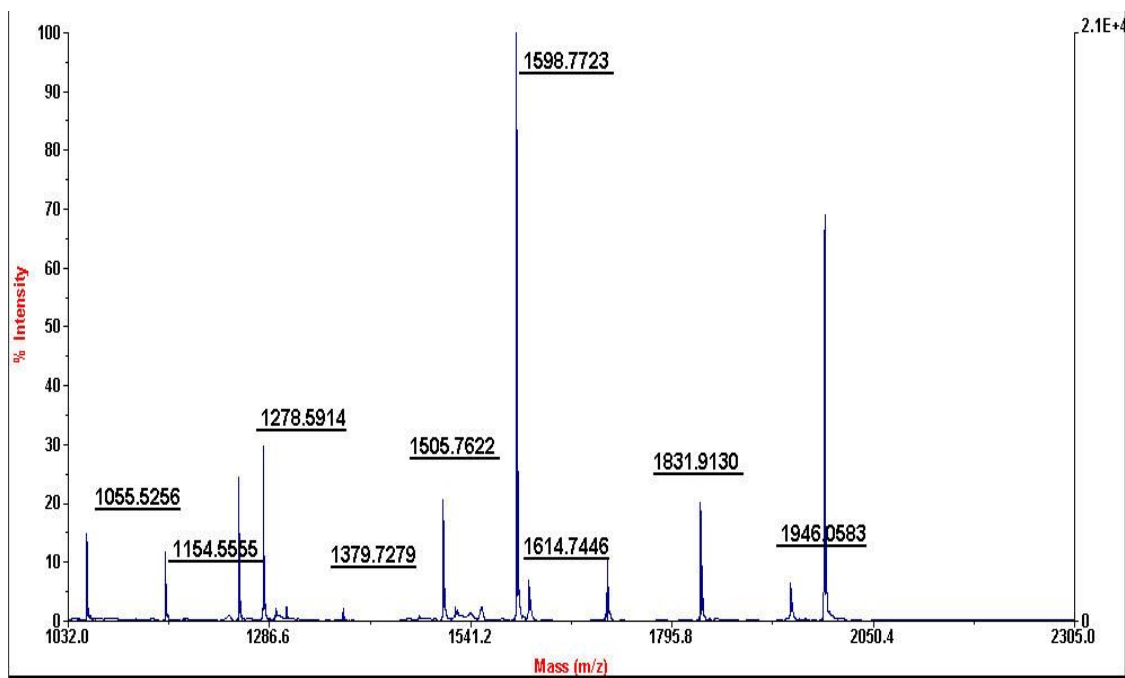

| Start - End | Observed  | Mr(expt)  | Mr(calc)  | Delta  | Miss Sequence            |
|-------------|-----------|-----------|-----------|--------|--------------------------|
| 1 - 18      | 1946.0583 | 1945.0511 | 1944.9944 | 0.0566 | 0 -.VNPTVFFDIAVDGEPLGR.V |

|           |           |           |           |         |   |                                    |
|-----------|-----------|-----------|-----------|---------|---|------------------------------------|
| 19 - 27   | 1055.5256 | 1054.5184 | 1054.5335 | -0.0151 | 0 | R.VSFELFADK.V                      |
| 19 - 30   | 1379.7279 | 1378.7206 | 1378.7496 | -0.0290 | 1 | R.VSFELFADKVPK.T                   |
| 55 - 68   | 1598.7723 | 1597.7650 | 1597.7381 | 0.0270  | 0 | R.IIPGFMCQGGDFTR.H                 |
| 55 - 68   | 1614.7446 | 1613.7373 | 1613.7330 | 0.0044  | 0 | R.IIPGFMCQGGDFTR.H ; Oxidation (M) |
| 76 - 90   | 1831.9130 | 1830.9057 | 1830.9039 | 0.0018  | 1 | K.SIYGKFEFEDENFILK.H               |
| 82 - 90   | 1154.5555 | 1153.5483 | 1153.5655 | -0.0172 | 0 | K.FEDENFILK.H                      |
| 131 - 143 | 1505.7622 | 1504.7549 | 1504.7377 | 0.0172  | 1 | K.VKEGMNIVEAMER.F                  |
| 133 - 143 | 1278.5914 | 1277.5841 | 1277.5743 | 0.0097  | 0 | K.EGMNIVEAMER.F                    |
| 154 - 164 | 1247.5788 | 1246.5715 | 1246.6227 | -0.0512 | 1 | K.KITIADCGQLE.-                    |

No match to: 1307.5892, 1713.7989, 1988.0615

183) Nucleoside diphosphate kinase B

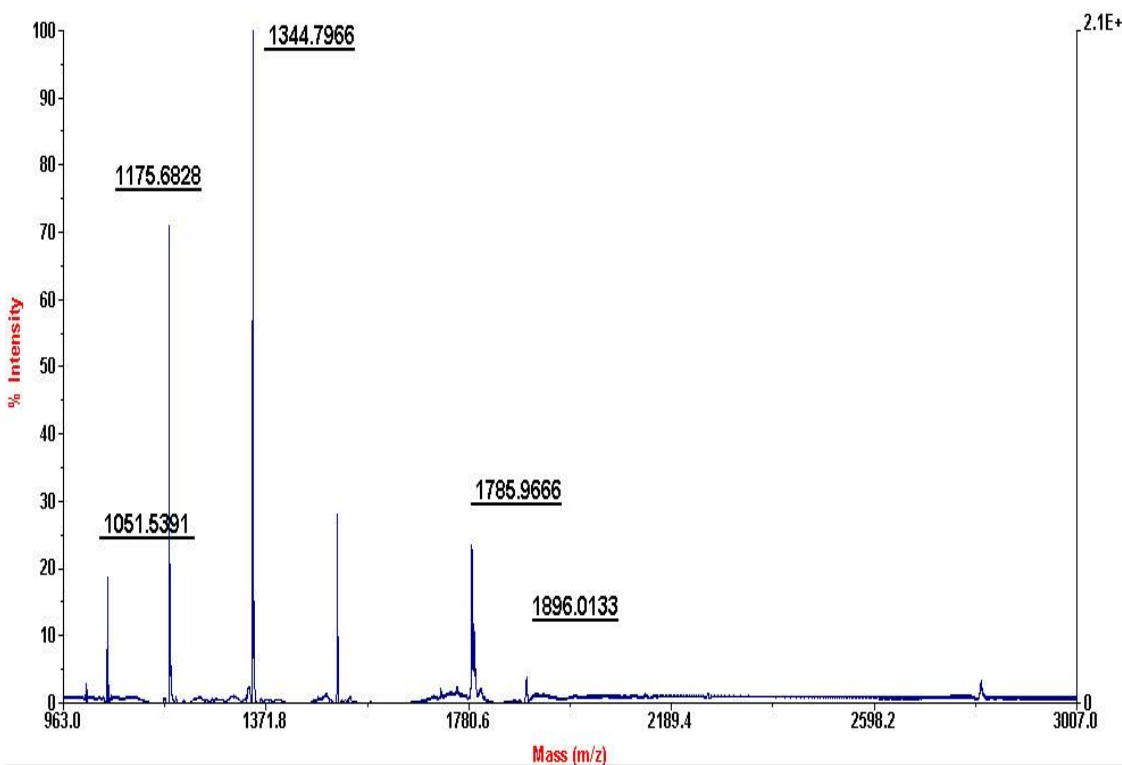

| Start - End | Observed  | Mr(expt)  | Mr(calc)  | Delta  | Miss Sequence           |
|-------------|-----------|-----------|-----------|--------|-------------------------|
| 7 - 18      | 1344.7966 | 1343.7893 | 1343.7561 | 0.0332 | 0 R.TFIAIKPDGVQR.G      |
| 57 - 66     | 1175.6828 | 1174.6755 | 1174.6498 | 0.0257 | 0 K.DRPFFPGLVK.Y        |
| 89 - 105    | 1785.9666 | 1784.9593 | 1784.9090 | 0.0503 | 0 R.VMLGETNPADSKPGTIR.G |

|           |           |           |           |        |   |                     |
|-----------|-----------|-----------|-----------|--------|---|---------------------|
| 106 - 114 | 1051.5391 | 1050.5318 | 1050.4916 | 0.0402 | 0 | R.GDFCIQVGR.N       |
| 129 - 143 | 1896.0133 | 1895.0060 | 1894.9716 | 0.0344 | 0 | K.EISLWFKPEELVDYK.S |

No match to: 1009.5716, 1514.8594, 1790.8626

185) WD repeat protein 1

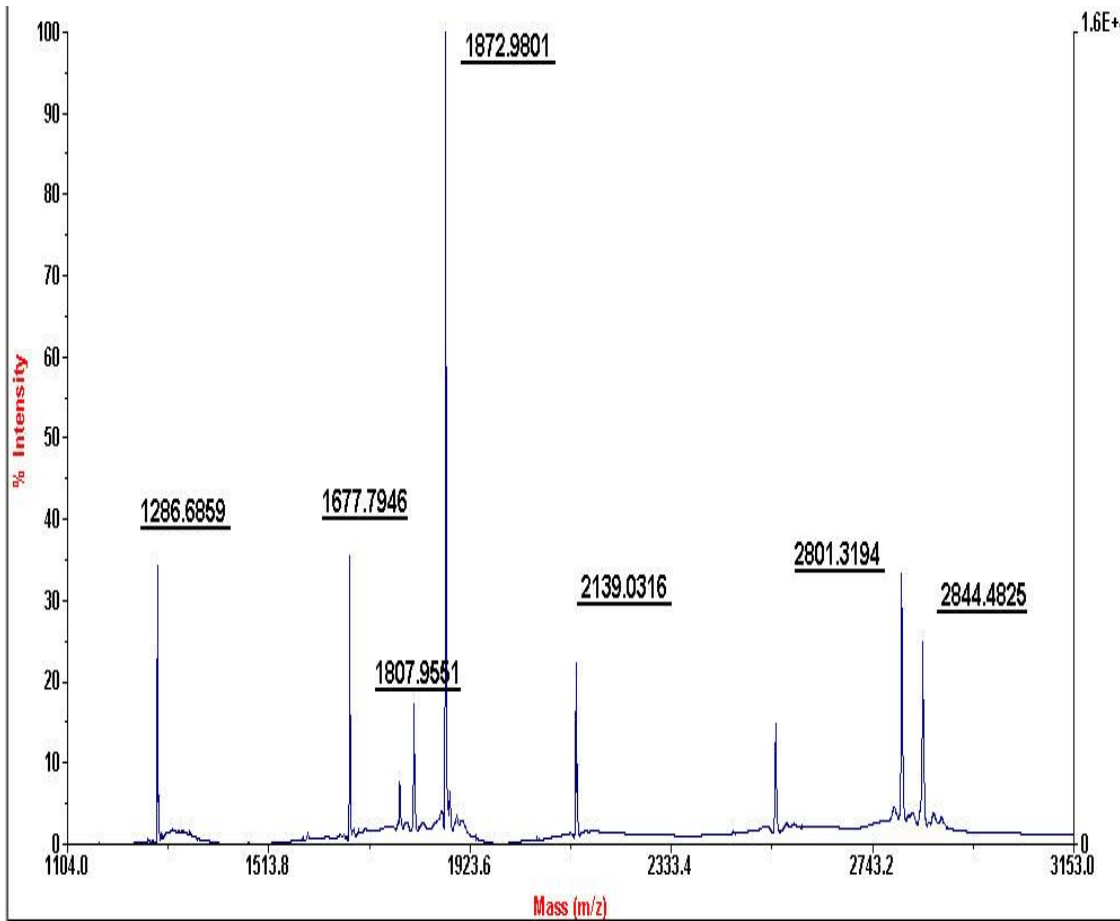

| Start - End | Observed  | Mr(expt)  | Mr(calc)  | Delta   | Miss Sequence                |
|-------------|-----------|-----------|-----------|---------|------------------------------|
| 7 - 17      | 1273.6504 | 1272.6432 | 1272.7190 | -0.0758 | 1 K.KVFASLPQVER.G            |
| 8 - 17      | 1145.5627 | 1144.5555 | 1144.6240 | -0.0685 | 0 K.VFASLPQVER.G             |
| 44 - 65     | 2418.0699 | 2417.0626 | 2417.2339 | -0.1712 | 0 R.NIDNPALADIYTEHAHQVVVAK.Y |
| 66 - 81     | 1618.6241 | 1617.6168 | 1617.7674 | -0.1506 | 0 K.YAPSGFYIASGDVSGK.L       |
| 127 - 147   | 2207.8932 | 2206.8860 | 2207.0646 | -0.1787 | 0 K.FGAVFLWDSGSSVGEITGHNK.V  |
| 162 - 180   | 2043.7354 | 2042.7281 | 2042.9043 | -0.1762 | 0 R.LATGSDDNCAAFFEGPPFK.F    |
| 371 - 389   | 2143.7457 | 2142.7384 | 2142.9231 | -0.1847 | 0 R.MTVDESGQLISCSMDDTVR.Y    |
| 490 - 511   | 2279.8700 | 2278.8627 | 2279.0528 | -0.1900 | 0 K.GPVTDVAYSHDGAFLAVCDASK.V |

No match to: 1193.5267, 1461.6590, 2540.0058, 2584.9694

185) Ig gamma-1 chain C region

| Start - End                             | Observed  | Mr(expt)  | Mr(calc)  | Delta   | Miss Sequence             |
|-----------------------------------------|-----------|-----------|-----------|---------|---------------------------|
| 106 - 131                               | 2844.4825 | 2843.4752 | 2843.4502 | 0.0250  | 0                         |
| <b>K.THTCPPCPAPELLGGPSVFLFPPKPK.D 2</b> |           |           |           |         |                           |
| 139 - 157                               | 2139.0316 | 2138.0243 | 2138.0201 | 0.0042  | 0 R.TPEVTCVVVDVSHEDPEVK.F |
| 158 - 171                               | 1677.7946 | 1676.7873 | 1676.7946 | -0.0073 | 0 K.FNWFYVDGVEVHNAK.T     |
| 185 - 200                               | 1807.9551 | 1806.9479 | 1806.9992 | -0.0513 | 0 R.VVSVLTVLHQDWLNGK.E    |
| 228 - 238                               | 1286.6859 | 1285.6786 | 1285.6666 | 0.0120  | 0 R.EPQVYTLPPSR.D         |
| 228 - 243                               | 1872.9801 | 1871.9729 | 1871.9629 | 0.0100  | 1 R.EPQVYTLPPSRDELTK.N    |
| 300 - 322                               | 2801.3194 | 2800.3121 | 2800.2598 | 0.0523  | 0                         |
| <b>R.WQQGNVFSCSVMHEALHNHYTQK.S</b>      |           |           |           |         |                           |

186) Rab GDP dissociation inhibitor beta

| Start - End | Observed  | Mr(expt)  | Mr(calc)  | Delta   | Miss Sequence              |
|-------------|-----------|-----------|-----------|---------|----------------------------|
| 56 - 68     | 1402.6491 | 1401.6419 | 1401.7074 | -0.0655 | 1 R.FKIPGSPPEMGR.G         |
| 69 - 79     | 1312.6361 | 1311.6288 | 1311.6935 | -0.0647 | 1 R.GRDWNVDLIPK.F          |
| 90 - 98     | 1125.5238 | 1124.5165 | 1124.5900 | -0.0734 | 0 K.MLLYTEVTR.Y            |
| 143 - 156   | 1712.8179 | 1711.8107 | 1711.8569 | -0.0463 | 1 K.FLVYVANFDEKDPR.T       |
| 194 - 208   | 1902.7915 | 1901.7842 | 1901.8102 | -0.0259 | 0 R.TDDYLDQPCYETINR.I      |
| 209 - 218   | 1179.6210 | 1178.6137 | 1178.6659 | -0.0521 | 1 R.IKLYSESLAR.Y           |
| 222 - 240   | 2141.0916 | 2140.0843 | 2140.0992 | -0.0150 | 0 K.SPLYLYPLYGLGELPQGFAR.L |
| 391 - 402   | 1365.6473 | 1364.6400 | 1364.6936 | -0.0536 | 0 K.DLGTESQIFISR.T         |
| 424 - 436   | 1606.6357 | 1605.6285 | 1605.6803 | -0.0518 | 1 R.MTGSEFDPEEMKR.K        |

No match to: 2592.2402

187) Selenium-binding protein 1

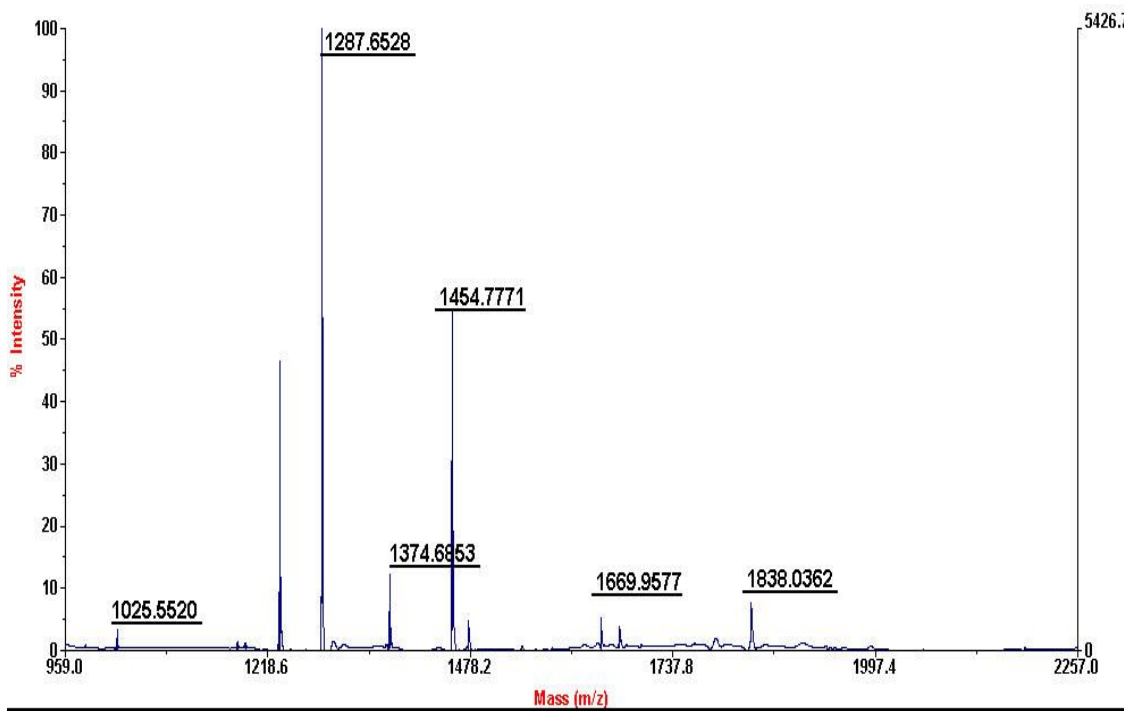

| Start - End | Observed  | Mr(expt)  | Mr(calc)  | Delta   | Miss Sequence          |
|-------------|-----------|-----------|-----------|---------|------------------------|
| 24 - 34     | 1454.7771 | 1453.7698 | 1453.7275 | 0.0423  | 0 R.EEIVYLPCIYR.N      |
| 53 - 62     | 1287.6528 | 1286.6455 | 1286.6190 | 0.0265  | 0 K.SPQYCQVIHR.L       |
| 196 - 211   | 1838.0362 | 1837.0289 | 1836.9304 | 0.0985  | 0 R.HNVMISTEWAAPNVLR.D |
| 246 - 254   | 1025.5520 | 1024.5447 | 1024.5917 | -0.0470 | 0 K.DGLIPLEIR.F        |
| 334 - 344   | 1374.6853 | 1373.6781 | 1373.6688 | 0.0093  | 0 R.QYDISDPQRPR.L      |
| 383 - 398   | 1669.9577 | 1668.9504 | 1668.8981 | 0.0523  | 1 R.VAGGPQMIQLSLDGKR.L |

No match to: 1233.6546, 1544.8122, 1645.8913, 2389.3592, 2547.5428

188) Actin-like protein 3



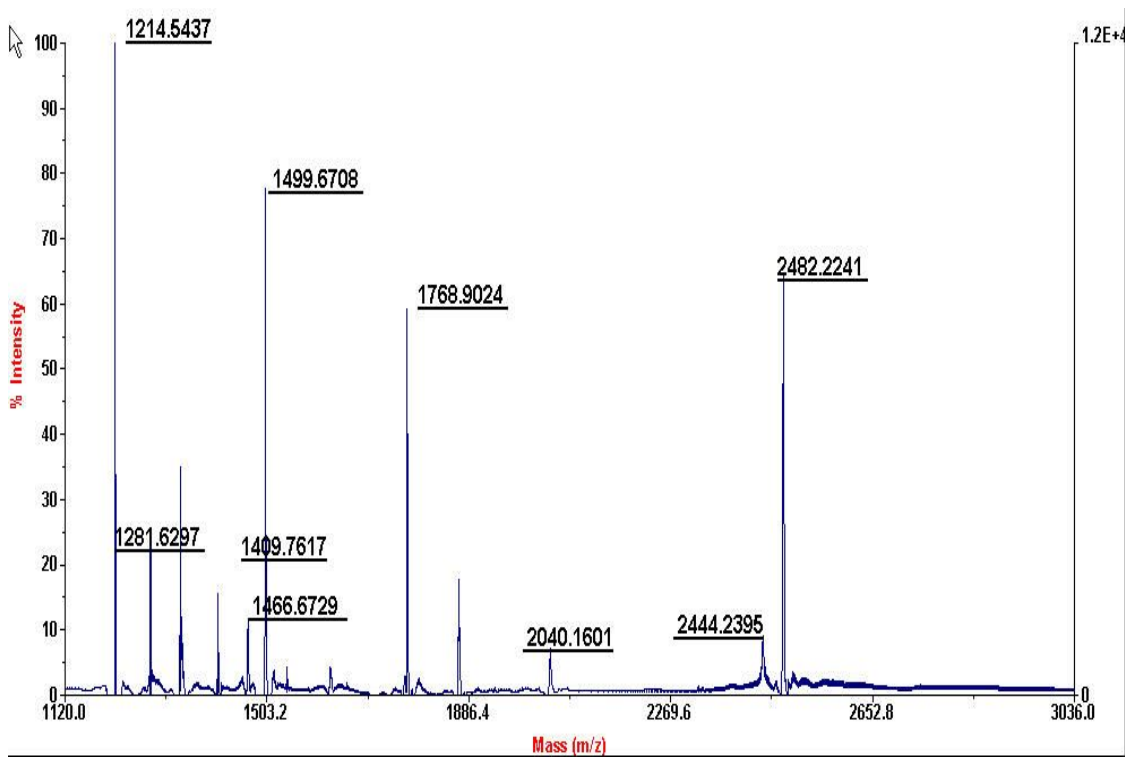

| Start - End | Observed  | Mr(expt)  | Mr(calc)  | Delta   | Miss Sequence                |
|-------------|-----------|-----------|-----------|---------|------------------------------|
| 54 - 75     | 2444.2395 | 2443.2322 | 2443.1794 | 0.0528  | 0 K.GVDDLDFFIGDEAIEKPTYATK.W |
| 80 - 91     | 1499.6708 | 1498.6635 | 1498.6874 | -0.0239 | 0 R.HGIVEDWDLMER.F           |
| 103 - 123   | 2482.2241 | 2481.2168 | 2481.1812 | 0.0356  | 0 R.AEPEDHYFLLTEPPLNTPENR.E  |
| 199 - 209   | 1409.7617 | 1408.7544 | 1408.7714 | -0.0170 | 0 R.DITYFIQQLLR.D            |
| 210 - 225   | 1768.9024 | 1767.8951 | 1767.9002 | -0.0051 | 1 R.DREVGIPPEQSLETAK.A       |
| 266 - 275   | 1214.5437 | 1213.5364 | 1213.5615 | -0.0251 | 0 K.EFSIDVGYER.F             |
| 318 - 329   | 1281.6297 | 1280.6225 | 1280.6546 | -0.0322 | 0 K.NIVLSGGSTMFR.D           |
| 358 - 374   | 2040.1601 | 2039.1528 | 2039.1462 | 0.0066  | 0 R.LKPKPIDVQVITHMQR.Y       |
| 398 - 409   | 1466.6729 | 1465.6656 | 1465.6871 | -0.0215 | 1 K.KDYEEIGPSICR.H           |
| 399 - 409   | 1338.5784 | 1337.5711 | 1337.5921 | -0.0210 | 0 K.DYEEIGPSICR.H            |

No match to: 1866.8906

189)

Glutathione synthetase

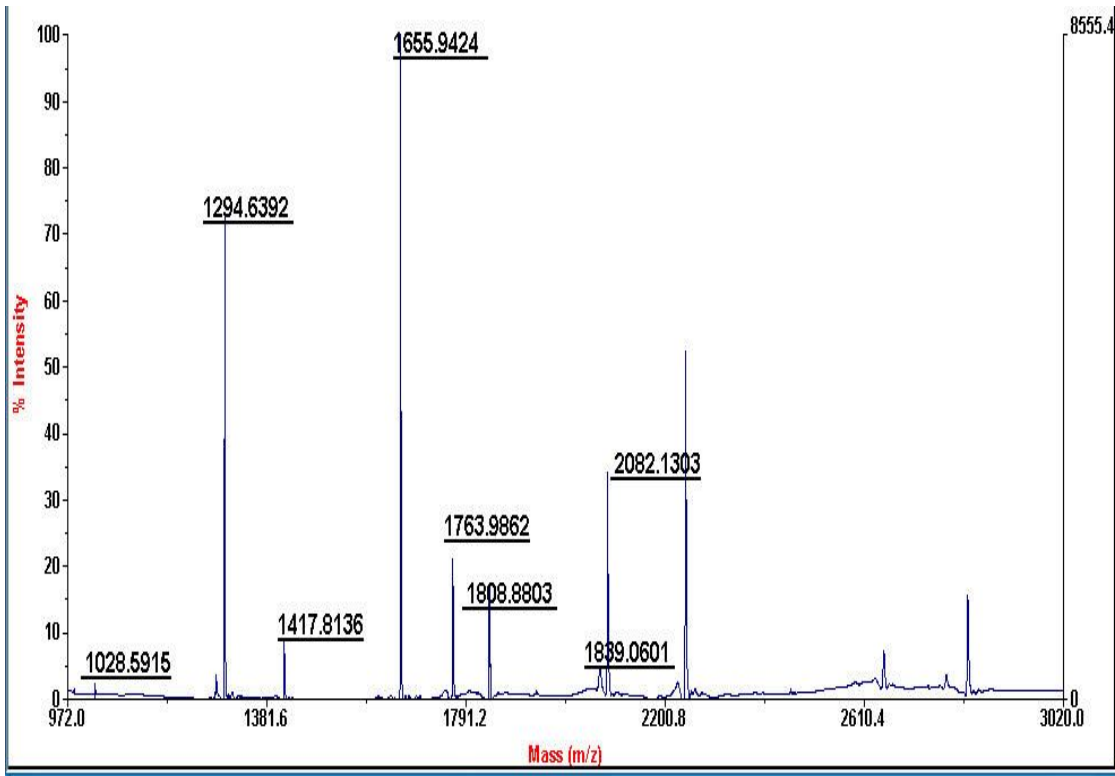

| Start - End | Observed  | Mr(expt)  | Mr(calc)  | Delta  | Miss Sequence            |
|-------------|-----------|-----------|-----------|--------|--------------------------|
| 113 - 125   | 1417.8136 | 1416.8063 | 1416.7724 | 0.0338 | 0 K.EGIAQTVFLGLNR.S      |
| 126 - 132   | 946.4164  | 945.4091  | 945.4014  | 0.0077 | 0 R.SDYMFQR.S            |
| 142 - 158   | 1763.9862 | 1762.9790 | 1762.9213 | 0.0577 | 0 K.QIEINTISASFGGLASR.T  |
| 222 - 230   | 1028.5915 | 1027.5842 | 1027.5662 | 0.0180 | 0 R.AIENELLAR.N          |
| 254 - 267   | 1655.9424 | 1654.9351 | 1654.8718 | 0.0633 | 0 R.LFVDGQEIAVVYFR.D     |
| 274 - 283   | 1294.6392 | 1293.6320 | 1293.6102 | 0.0218 | 0 R.QYSLQNWEAR.L         |
| 368 - 384   | 1808.8803 | 1807.8731 | 1807.8410 | 0.0321 | 0 R.EGGGNNLYGEEMVQALK.Q  |
| 401 - 418   | 2082.1303 | 2081.1230 | 2081.0363 | 0.0867 | 0 K.IEPEPFENCLLRPGSPAR.V |
| 419 - 434   | 1839.0601 | 1838.0528 | 1837.9760 | 0.0769 | 0 R.VVQCISELGIFGVYVR.Q   |

No match to: 1277.6068, 2242.2811, 2822.6126

190) Plastin-2

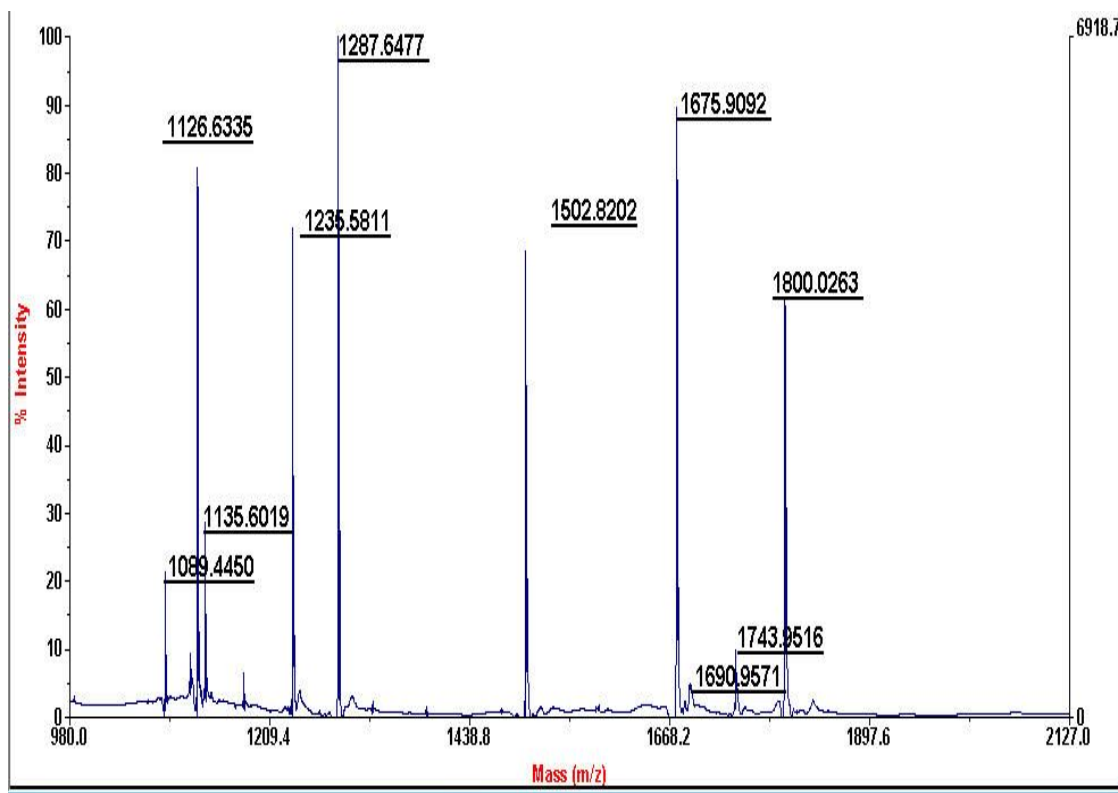

| Start - End | Observed  | Mr(expt)  | Mr(calc)  | Delta   | Miss Sequence           |
|-------------|-----------|-----------|-----------|---------|-------------------------|
| 133 - 141   | 1089.4450 | 1088.4377 | 1088.4557 | -0.0180 | 0 K.ALENDPDCR.H         |
| 166 - 178   | 1502.8202 | 1501.8129 | 1501.7446 | 0.0683  | 0 K.MINLSVPDTIDER.T     |
| 310 - 326   | 1743.9516 | 1742.9443 | 1742.8508 | 0.0935  | 0 K.GDEEGVPAVVIDMSGLR.E |
| 334 - 343   | 1235.5811 | 1234.5738 | 1234.5434 | 0.0304  | 0 R.AECMLQAER.L         |
| 348 - 357   | 1135.6019 | 1134.5946 | 1134.6033 | -0.0086 | 0 R.QFVTATDVVR.G        |
| 402 - 412   | 1287.6477 | 1286.6404 | 1286.6189 | 0.0214  | 0 R.NWMNSLGVNPR.V       |
| 433 - 441   | 1126.6335 | 1125.6263 | 1125.6294 | -0.0032 | 1 K.IKVPVDWNR.V         |
| 473 - 488   | 1675.9092 | 1674.9019 | 1674.8325 | 0.0694  | 0 K.FSLVGIGGQDLNEG NR.T |
| 501 - 515   | 1690.9571 | 1689.9498 | 1689.9049 | 0.0449  | 1 R.RYTLNILEEIGGGQK.V   |
| 516 - 530   | 1800.0263 | 1799.0190 | 1798.9213 | 0.0977  | 0 K.VNDDIIVNWVNETLR.E   |

No match to: 1118.5834, 1326.7191, 1388.7556

191 ) Vitamin D-binding protein precursor

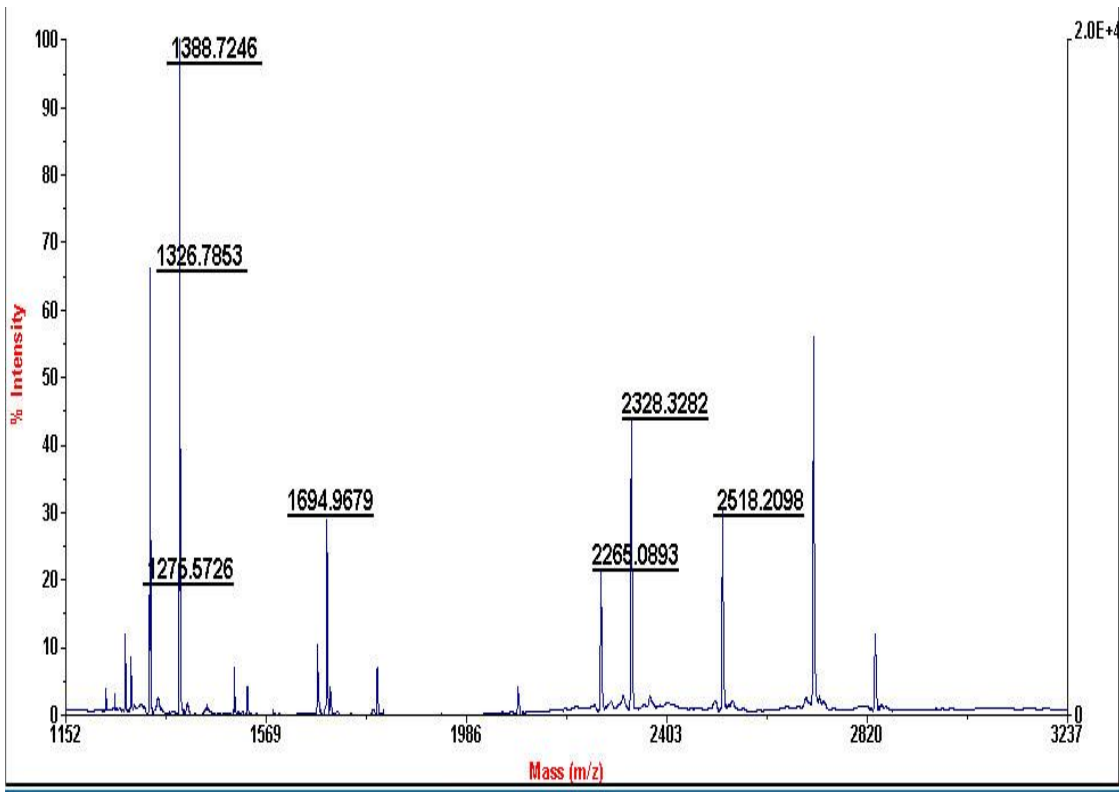

| Start - End | Observed  | Mr(expt)  | Mr(calc)  | Delta  | Miss Sequence                |
|-------------|-----------|-----------|-----------|--------|------------------------------|
| 31 - 50     | 2328.3282 | 2327.3209 | 2327.1797 | 0.1412 | 1 K.EFSLGKEDFTSLSLVLYSR.K    |
| 51 - 65     | 1694.9679 | 1693.9606 | 1693.9039 | 0.0567 | 1 R.KFPSGTFEQVSQLVK.E        |
| 66 - 87     | 2518.2098 | 2517.2025 | 2517.0094 | 0.1931 | 0 K.EVVSLTEACCAEGADPDCYDTR.T |
| 3           |           |           |           |        |                              |
| 95 - 114    | 2265.0893 | 2264.0821 | 2263.9296 | 0.1525 | 0 K.SCESNSPPVHPGTAECCTK.E 3  |
| 219 - 229   | 1275.5726 | 1274.5653 | 1274.5601 | 0.0052 | 0 R.VCSQYAAYGEK.K            |
| 342 - 352   | 1388.7246 | 1387.7173 | 1387.6805 | 0.0368 | 1 K.VMDKYTFELSR.R            |
| 353 - 363   | 1326.7853 | 1325.7780 | 1325.7455 | 0.0325 | 1 R.RTHLPEVFLSK.V            |

No match to: 1675.9278, 2312.3079, 2707.4172, 2835.6021

192 ) Tubulin alpha-3 chain

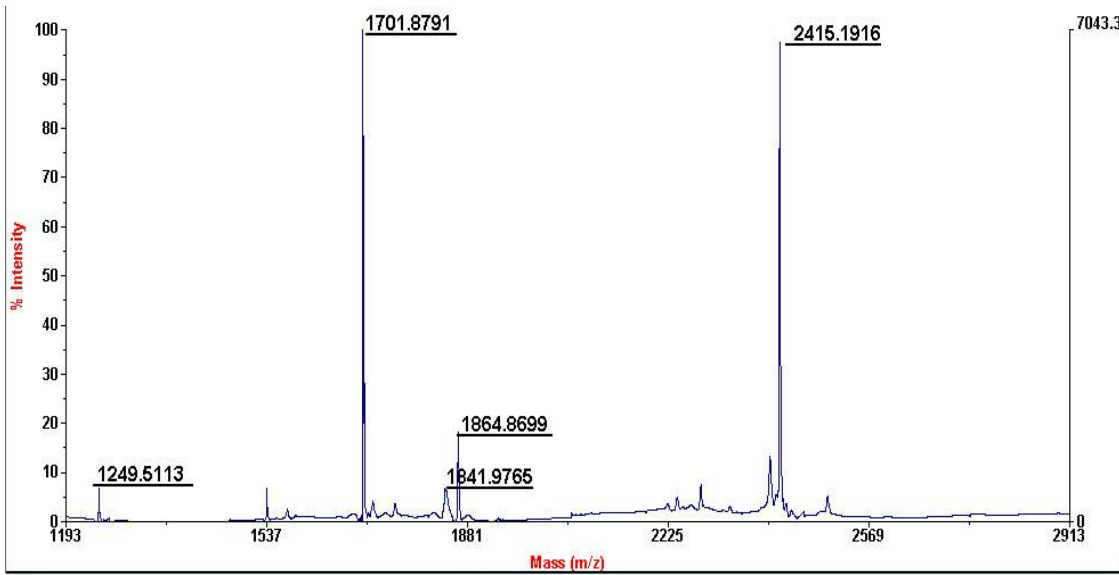

| Start - End | Observed  | Mr(expt)  | Mr(calc)  | Delta   | Miss Sequence               |
|-------------|-----------|-----------|-----------|---------|-----------------------------|
| 65 - 79     | 1701.8791 | 1700.8718 | 1700.8984 | -0.0266 | 0 R.AVFVDLEPTVIDEVR.T       |
| 85 - 105    | 2415.1916 | 2414.1843 | 2414.1978 | -0.0135 | 1 R.QLFHPEQLITGKEDAANNYAR.G |
| 106 - 121   | 1841.9765 | 1840.9692 | 1841.0046 | -0.0354 | 1 R.GHYTIGKEIIDLVLDRI       |
| 312 - 320   | 1249.5113 | 1248.5040 | 1248.5453 | -0.0413 | 0 K.YMACCLLYR.G 2           |
| 374 - 390   | 1864.8699 | 1863.8626 | 1863.8971 | -0.0345 | 0 R.AVCMLSNTTAIAEAWAR.L     |

No match to: 1536.7079

193 ) Alpha-1-antitrypsin precursor

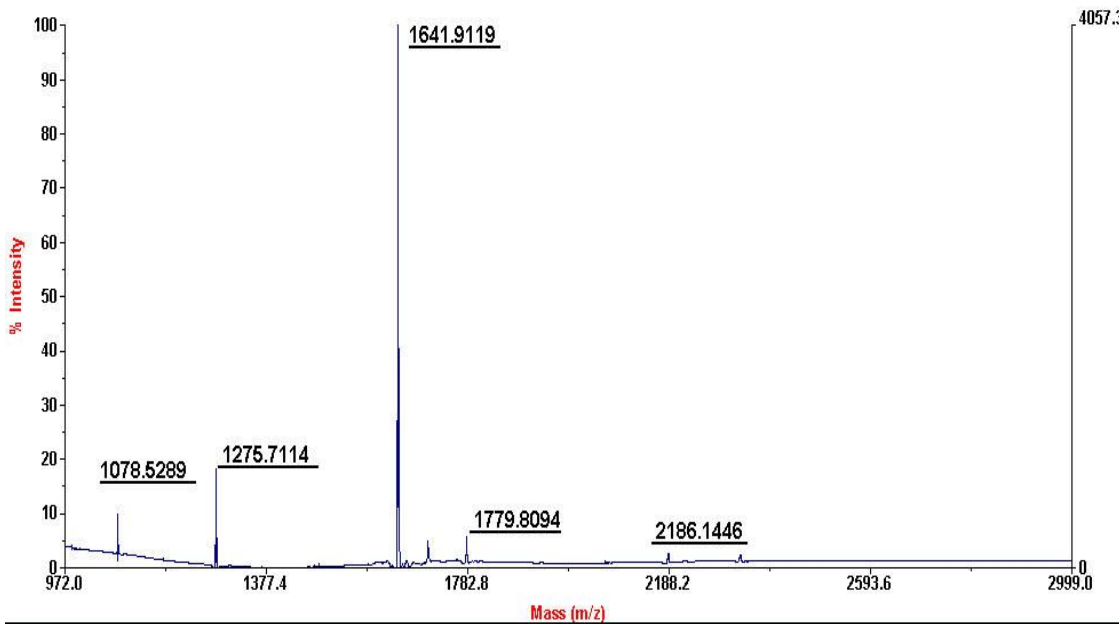

| Start - End | Observed  | Mr(expt)  | Mr(calc)  | Delta  | Miss Sequence        |
|-------------|-----------|-----------|-----------|--------|----------------------|
| 35 - 49     | 1779.8094 | 1778.8021 | 1778.7608 | 0.0413 | 0 K.TDTSHHDQDHPFNKI  |
| 50 - 63     | 1641.9119 | 1640.9046 | 1640.8562 | 0.0484 | 0 K.ITPNLAFAFLSLYR.Q |

|           |           |           |           |        |   |                         |
|-----------|-----------|-----------|-----------|--------|---|-------------------------|
| 161 - 179 | 2186.1446 | 2185.1374 | 2185.0327 | 0.1047 | 1 | K.LYHSEAFTVNFGDTBEAKK.Q |
| 216 - 225 | 1275.7114 | 1274.7042 | 1274.6771 | 0.0271 | 1 | K.GKWERPFEVK.D          |
| 299 - 306 | 1078.5289 | 1077.5216 | 1077.5203 | 0.0013 | 1 | K.FLENEDRR.S            |

No match to: 1483.7550, 1701.9693, 2330.1319

194 ) Tubulin beta chain (Tubulin beta-5 chain)

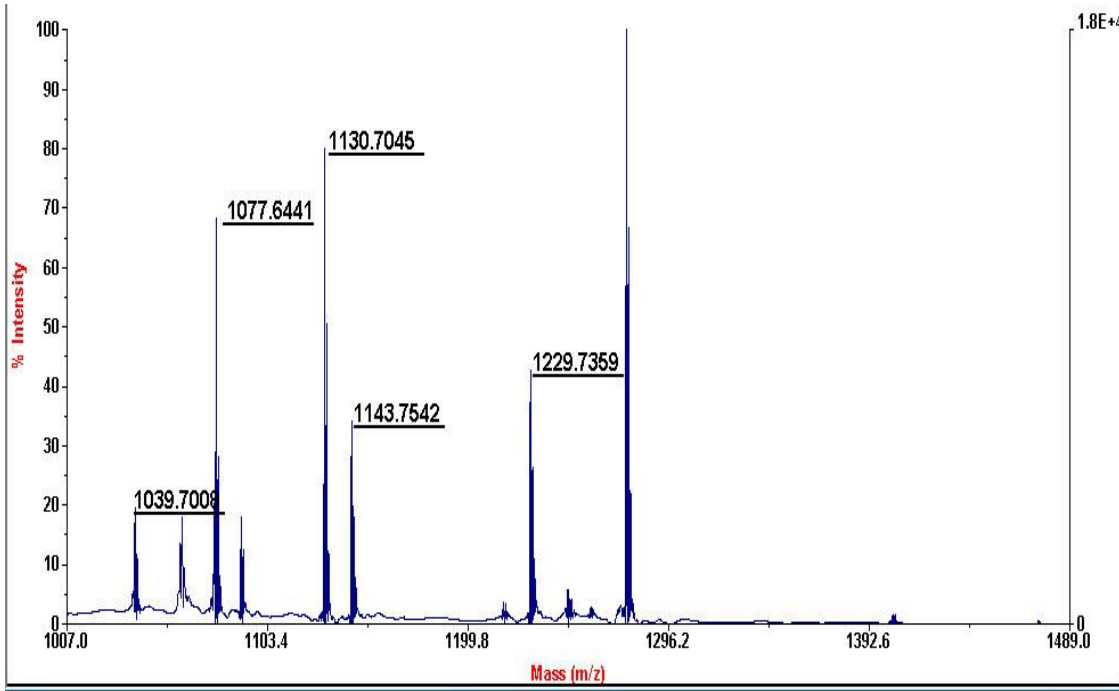

| Start - End | Observed  | Mr(expt)  | Mr(calc)  | Delta  | Miss Sequence    |
|-------------|-----------|-----------|-----------|--------|------------------|
| 155 - 162   | 1077.6441 | 1076.6368 | 1076.5250 | 0.1118 | 1 K.IREEYPDR.I   |
| 242 - 251   | 1130.7045 | 1129.6972 | 1129.5880 | 0.1092 | 0 R.FPGQLNADLR.K |
| 253 - 262   | 1143.7542 | 1142.7469 | 1142.6270 | 0.1199 | 0 K.LAVNMVPFPR.L |
| 310 - 318   | 1039.7008 | 1038.6935 | 1038.5862 | 0.1074 | 0 R.YLTVAAVFR.G  |
| 381 - 390   | 1229.7359 | 1228.7287 | 1228.5910 | 0.1377 | 0 R.ISEQFTAMFR.R |

No match to: 1275.8303, 1642.0975, 1959.2850

195 ) Alpha-1-antitrypsin precursor

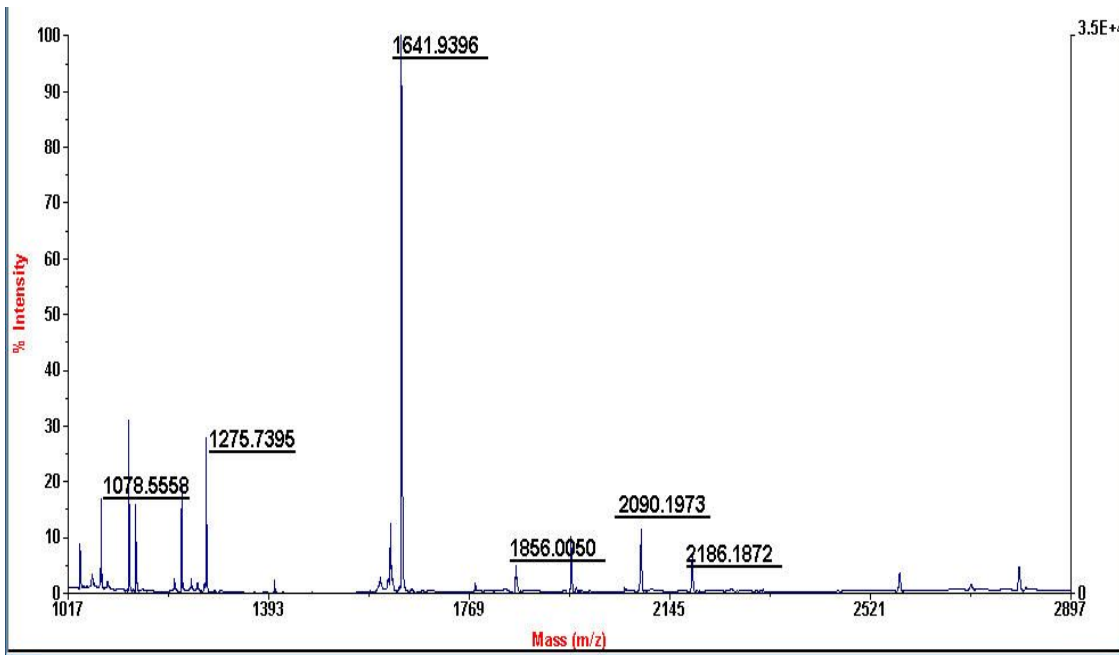

| Start - End | Observed  | Mr(expt)  | Mr(calc)  | Delta  | Miss Sequence             |
|-------------|-----------|-----------|-----------|--------|---------------------------|
| 50 - 63     | 1641.9396 | 1640.9323 | 1640.8562 | 0.0761 | 0 K.ITPNLAEFAPSLYR.Q      |
| 161 - 179   | 2186.1872 | 2185.1799 | 2185.0327 | 0.1472 | 1 K.LYHSEAFTVNFGDTEEAKK.Q |
| 199 - 215   | 2090.1973 | 2089.1900 | 2089.0883 | 0.1016 | 1 K.ELDRDTVFALVNYIFFK.G   |
| 216 - 225   | 1275.7395 | 1274.7322 | 1274.6771 | 0.0551 | 1 K.GKWERPFEVK.D          |
| 299 - 306   | 1078.5558 | 1077.5485 | 1077.5203 | 0.0283 | 1 K.FLENEDRR.S            |
| 390 - 404   | 1856.0050 | 1854.9977 | 1854.9702 | 0.0276 | 0 K.FNKPFVFLMIEQNTK.S     |

No match to: 1039.6252, 1130.6368, 1143.6830, 1229.6539, 1620.9178, 1959.0886, 2799.5186

196 ) Tubulin beta-2C chain (Tubulin beta-2 chain)

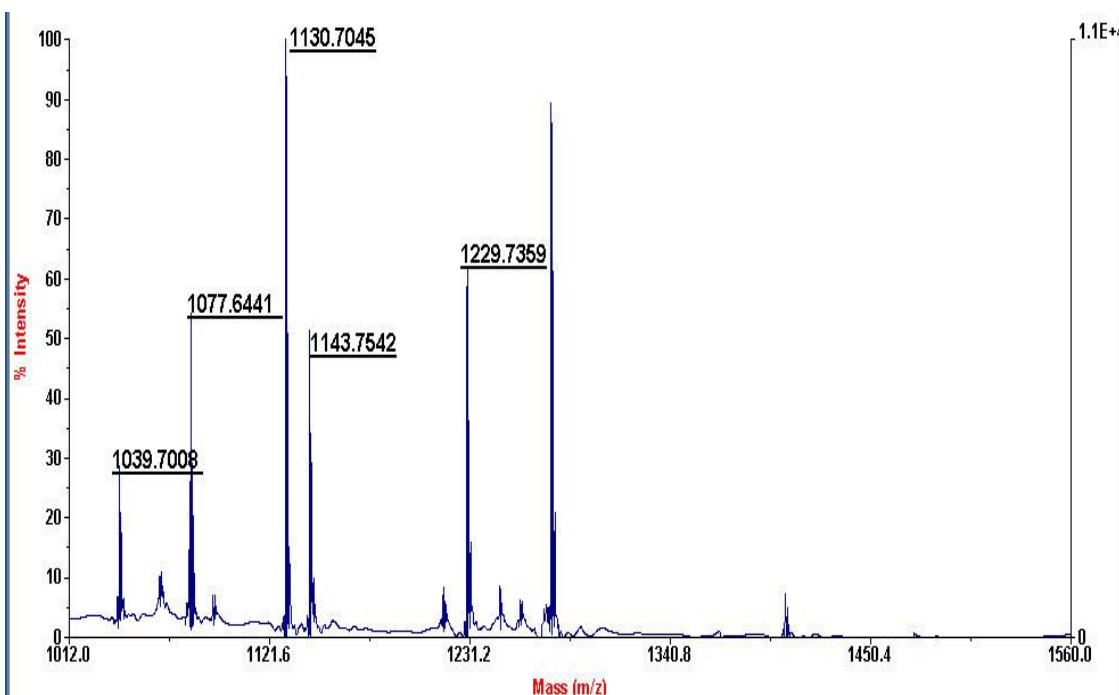

| Start - End | Observed  | Mr(expt)  | Mr(calc)  | Delta  | Miss Sequence    |
|-------------|-----------|-----------|-----------|--------|------------------|
| 155 - 162   | 1077.6441 | 1076.6368 | 1076.5250 | 0.1118 | 1 K.IREEYPDR.I   |
| 242 - 251   | 1130.7045 | 1129.6972 | 1129.5880 | 0.1092 | 0 R.FPGQLNADLR.K |
| 253 - 262   | 1143.7542 | 1142.7469 | 1142.6270 | 0.1199 | 0 K.LAVNMVPFPR.L |
| 310 - 318   | 1039.7008 | 1038.6935 | 1038.5862 | 0.1074 | 0 R.YLTVAAVFR.G  |
| 381 - 390   | 1229.7359 | 1228.7287 | 1228.5910 | 0.1377 | 0 R.ISEQFTAMFR.R |

No match to: 1275.8303, 1642.0975, 1959.2850

197 ) Tubulin beta-4 chain (Tubulin 5 beta)

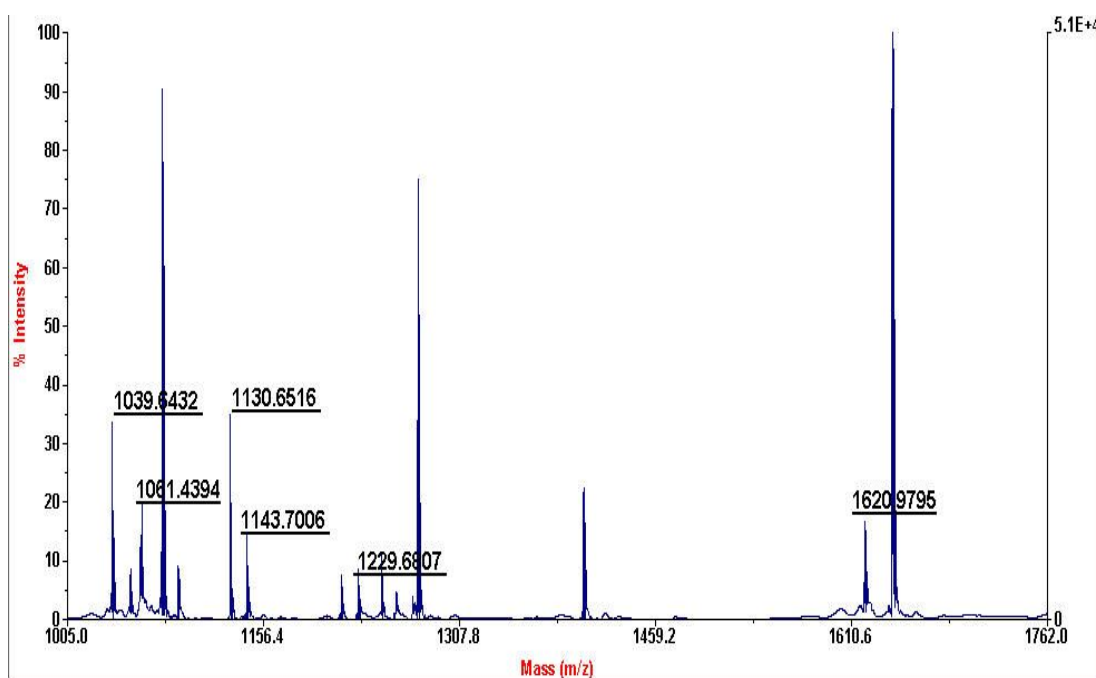

| Start - End | Observed  | Mr(expt)  | Mr(calc)  | Delta   | Miss Sequence        |
|-------------|-----------|-----------|-----------|---------|----------------------|
| 155 - 162   | 1061.4394 | 1060.4321 | 1060.5301 | -0.0980 | 1 K.IREEFPDR.I       |
| 242 - 251   | 1130.6516 | 1129.6443 | 1129.5880 | 0.0564  | 0 R.FPGQLNADLR.K     |
| 253 - 262   | 1143.7006 | 1142.6933 | 1142.6270 | 0.0663  | 0 K.LAVNMVPFPR.L     |
| 263 - 276   | 1620.9795 | 1619.9722 | 1619.8282 | 0.1440  | 0 R.LHFFMPGFAPLTSR.G |
| 310 - 318   | 1039.6432 | 1038.6359 | 1038.5862 | 0.0497  | 0 R.YLTVAAVFR.G      |
| 381 - 390   | 1229.6807 | 1228.6734 | 1228.5910 | 0.0824  | 0 R.ISEQFTAMFR.R     |

No match to: 1078.5613, 1090.6066, 1247.6591, 1275.7576, 1403.7960, 1641.9997, 1779.9016, 1856.1159, 1959.1804, 2090.3126, 2186.2275



198 ) Tropomyosin beta chain (Tropomyosin 2) (Beta-tropomyosin)

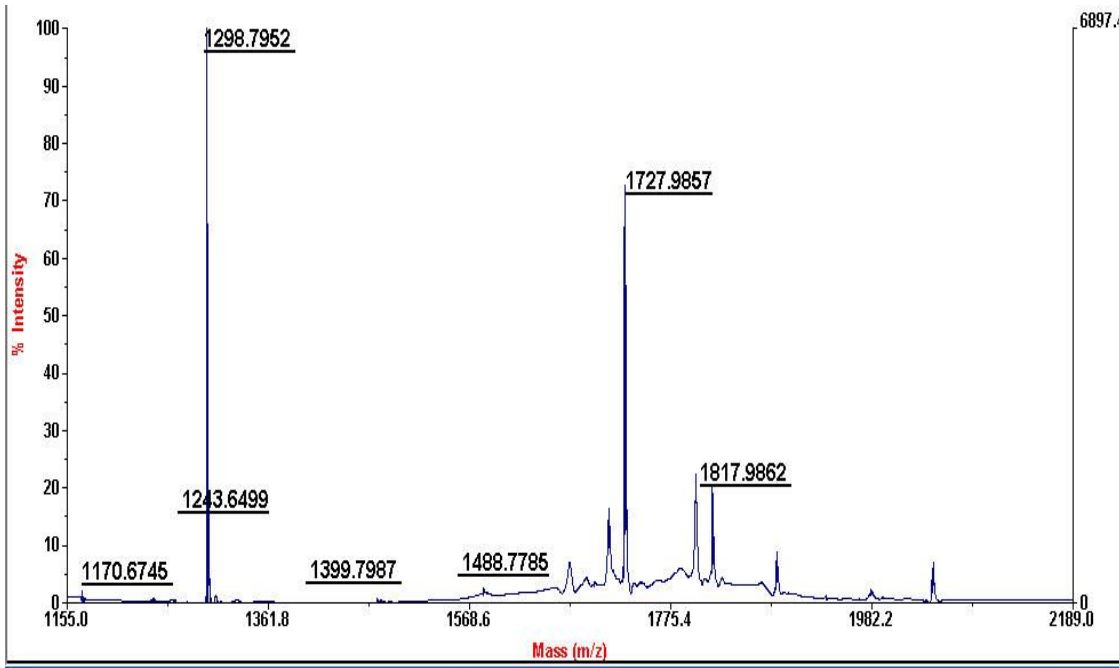

| Start - End | Observed  | Mr(expt)  | Mr(calc)  | Delta   | Miss Sequence          |
|-------------|-----------|-----------|-----------|---------|------------------------|
| 78 - 91     | 1488.7785 | 1487.7712 | 1487.7328 | 0.0384  | 1 K.ATDAEADVASLNRR.I   |
| 91 - 101    | 1399.7987 | 1398.7915 | 1398.7466 | 0.0448  | 1 R.RIQLVEEELDR.A      |
| 92 - 101    | 1243.6499 | 1242.6426 | 1242.6455 | -0.0029 | 0 R.IQLVEEELDR.A       |
| 92 - 105    | 1727.9857 | 1726.9785 | 1726.8849 | 0.0935  | 1 R.IQLVEEELDRAQER.L   |
| 168 - 178   | 1298.7952 | 1297.7879 | 1297.7605 | 0.0274  | 1 R.KLVILEGELER.S      |
| 169 - 178   | 1170.6745 | 1169.6672 | 1169.6655 | 0.0017  | 0 K.LVILEGELER.S       |
| 190 - 205   | 1817.9862 | 1816.9789 | 1816.9240 | 0.0549  | 1 K.CGDLEEELKIVTNNLK.S |

No match to: 1710.7837, 1800.0945, 1884.1100, 1981.1106, 1996.1232, 2044.2065, 2202.3341, 2538.4336

201 ) Tropomyosin alpha-4 chain (Tropomyosin-4) (TM30p1)

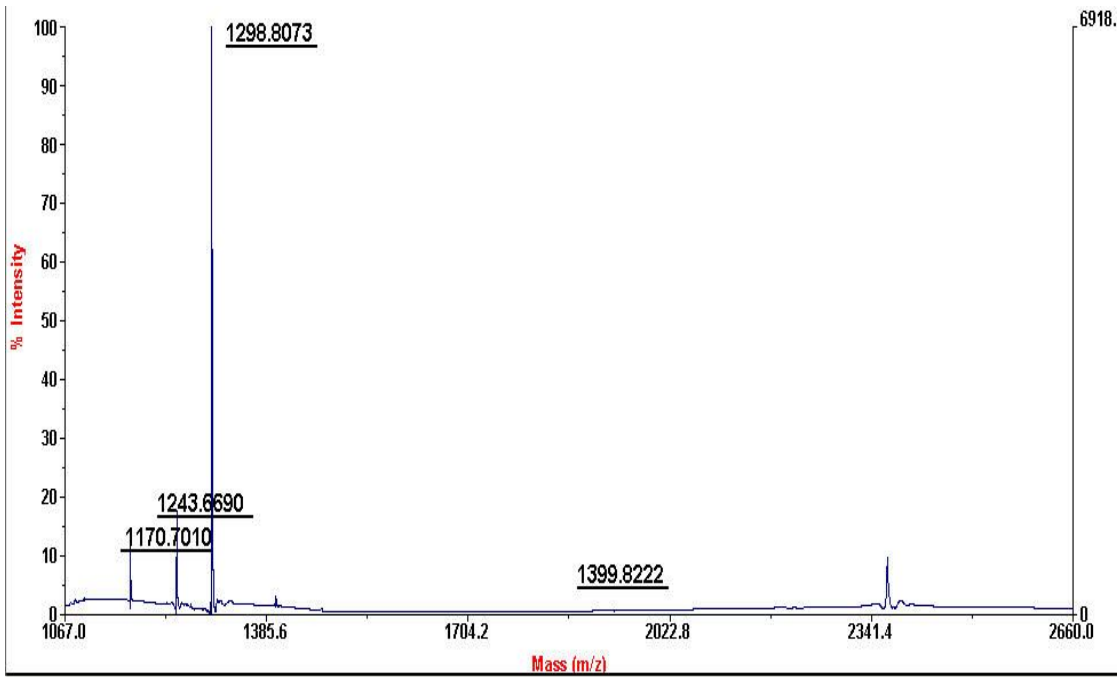

| Start - End | Observed  | Mr(expt)  | Mr(calc)  | Delta  | Miss Sequence     |
|-------------|-----------|-----------|-----------|--------|-------------------|
| 55 - 65     | 1399.8222 | 1398.8149 | 1398.7466 | 0.0683 | 1 R.RIQLVEEELDR.A |
| 56 - 65     | 1243.6690 | 1242.6617 | 1242.6455 | 0.0162 | 0 R.IQLVEEELDR.A  |
| 132 - 142   | 1298.8073 | 1297.8000 | 1297.7605 | 0.0396 | 1 R.KLVILEGELER.A |
| 133 - 142   | 1170.7010 | 1169.6937 | 1169.6655 | 0.0282 | 0 K.LVILEGELER.A  |

202 ) Actin, gamma-enteric smooth muscle (Smooth muscle gamma actin) (Gamma-2-actin) (Alpha-actin-3)

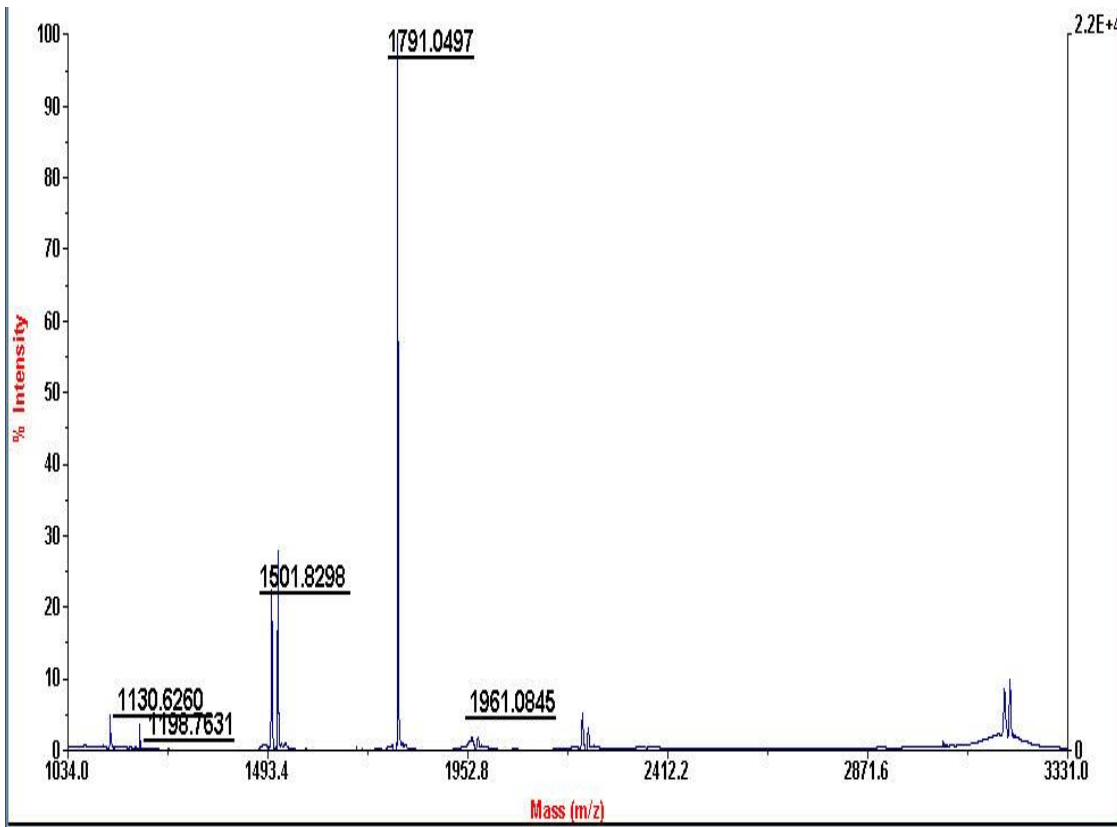

| Start - End | Observed  | Mr(expt)  | Mr(calc)  | Delta  | Miss Sequence          |
|-------------|-----------|-----------|-----------|--------|------------------------|
| 30 - 40     | 1198.7631 | 1197.7558 | 1197.6982 | 0.0577 | 0 R.AVFPSIVGRPR.H      |
| 70 - 85     | 1961.0845 | 1960.0772 | 1959.9036 | 0.1736 | 0 K.YPIEHGIITNWDDMEK.I |
| 86 - 96     | 1501.8298 | 1500.8225 | 1500.7262 | 0.0963 | 0 K.IWHHSFYNELR.V      |
| 198 - 207   | 1130.6260 | 1129.6188 | 1129.5403 | 0.0784 | 0 R.GYSFVTTAER.E       |
| 240 - 255   | 1791.0497 | 1790.0424 | 1789.8846 | 0.1579 | 0 K.SYELPDGQVITIGNER.F |

No match to: 1499.7788, 1515.8613, 1975.0948, 2215.2821, 2228.2983

203 ) Actin, alpha cardiac muscle 1 (Alpha-cardiac actin)

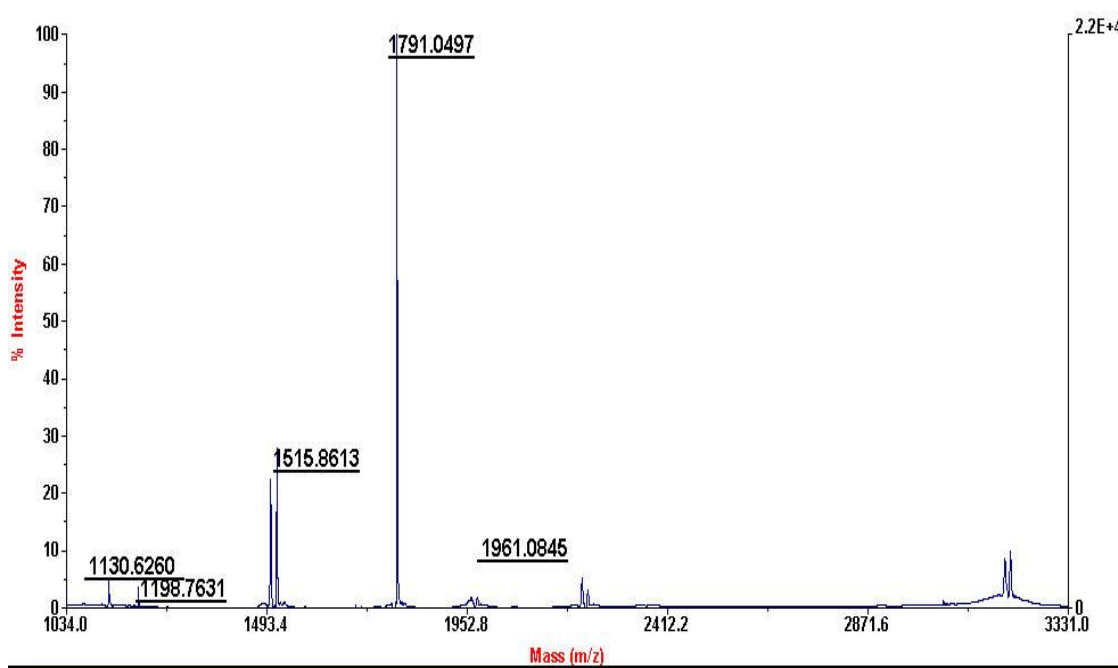

| Start - End | Observed  | Mr(expt)  | Mr(calc)  | Delta  | Miss Sequence          |
|-------------|-----------|-----------|-----------|--------|------------------------|
| 31 - 41     | 1198.7631 | 1197.7558 | 1197.6982 | 0.0577 | 0 R.AVFPSIVGRPR.H      |
| 71 - 86     | 1961.0845 | 1960.0772 | 1959.9036 | 0.1736 | 0 K.YPIEHGIITNWDDMEK.I |
| 87 - 97     | 1515.8613 | 1514.8540 | 1514.7419 | 0.1121 | 0 K.IWHHTFYNELR.V      |
| 199 - 208   | 1130.6260 | 1129.6188 | 1129.5403 | 0.0784 | 0 R.GYSFVTTAER.E       |
| 241 - 256   | 1791.0497 | 1790.0424 | 1789.8846 | 0.1579 | 0 K.SYELPDGQVITIGNER.F |

No match to: 1499.7788, 1501.8298, 1975.0948, 2215.2821, 2228.2983

204 ) Actin, alpha skeletal muscle (Alpha-actin-1)

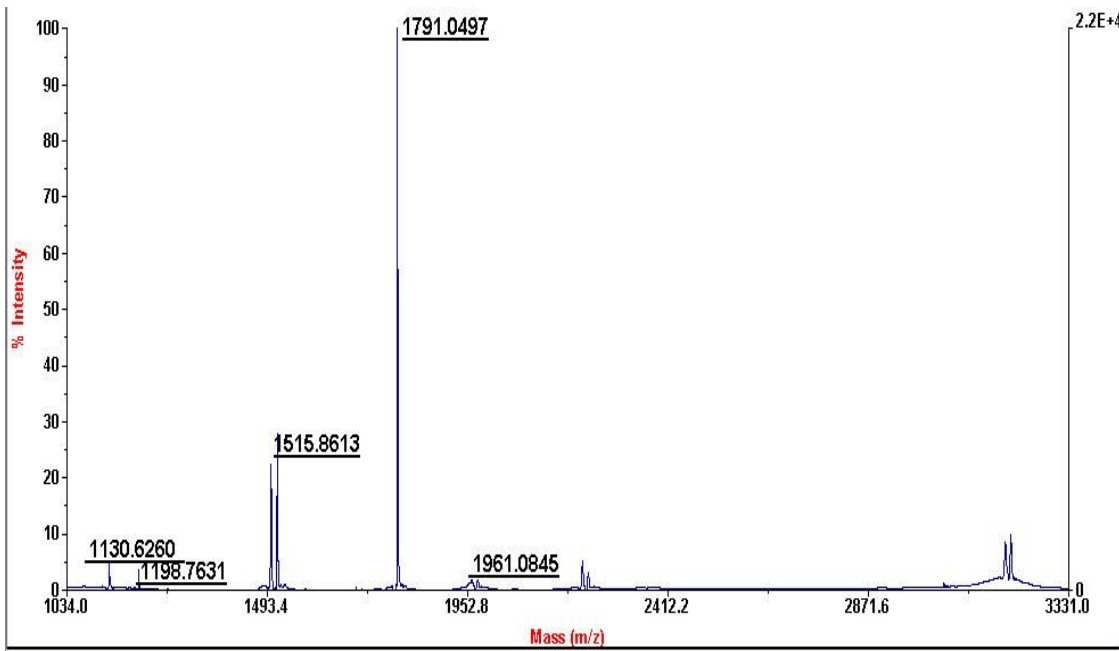

| Start - End | Observed  | Mr(expt)  | Mr(calc)  | Delta  | Miss Sequence          |
|-------------|-----------|-----------|-----------|--------|------------------------|
| 31 - 41     | 1198.7631 | 1197.7558 | 1197.6982 | 0.0577 | 0 R.AVFPSIVGRPR.H      |
| 71 - 86     | 1961.0845 | 1960.0772 | 1959.9036 | 0.1736 | 0 K.YPIEHGIITNWDDMEK.I |
| 87 - 97     | 1515.8613 | 1514.8540 | 1514.7419 | 0.1121 | 0 K.IWHHTFYNELR.V      |
| 199 - 208   | 1130.6260 | 1129.6188 | 1129.5403 | 0.0784 | 0 R.GYSFVTTAER.E       |
| 241 - 256   | 1791.0497 | 1790.0424 | 1789.8846 | 0.1579 | 0 K.SYELPDGQVITIGNER.F |

No match to: 1499.7788, 1501.8298, 1975.0948, 2215.2821, 2228.2983

205 ) Actin, aortic smooth muscle (Alpha-actin-2)

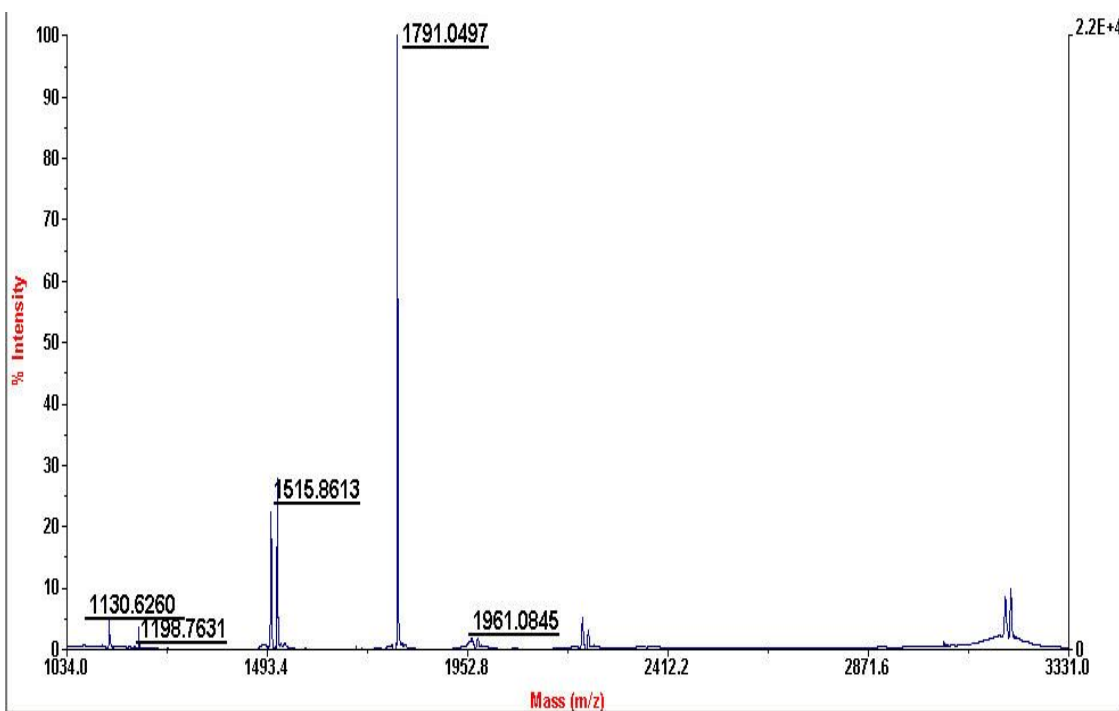

| Start - End | Observed  | Mr(expt)  | Mr(calc)  | Delta  | Miss Sequence          |
|-------------|-----------|-----------|-----------|--------|------------------------|
| 31 - 41     | 1198.7631 | 1197.7558 | 1197.6982 | 0.0577 | 0 R.AVFPSIVGRPR.H      |
| 71 - 86     | 1961.0845 | 1960.0772 | 1959.9036 | 0.1736 | 0 K.YPIEHGIITNWDDMEK.I |
| 87 - 97     | 1501.8298 | 1500.8225 | 1500.7262 | 0.0963 | 0 K.IWHHSFYNELR.V      |
| 199 - 208   | 1130.6260 | 1129.6188 | 1129.5403 | 0.0784 | 0 R.GYSFVTTAER.E       |
| 241 - 256   | 1791.0497 | 1790.0424 | 1789.8846 | 0.1579 | 0 K.SYELPDGQVITIGNER.F |

No match to: 1499.7788, 1515.8613, 1975.0948, 2215.2821, 2228.2983

206 ) Creatine kinase B-type (EC 2.7.3.2) (Creatine kinase B chain) (B-CK)

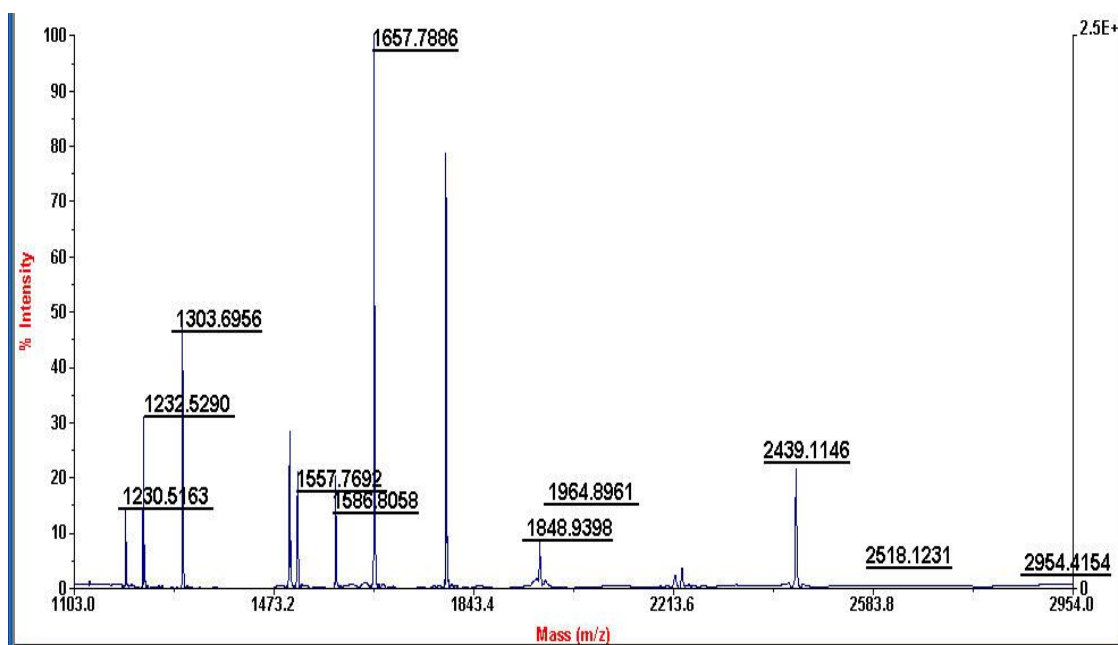

| Start - End | Observed  | Mr(expt)  | Mr(calc)  | Delta   | Miss Sequence                 |
|-------------|-----------|-----------|-----------|---------|-------------------------------|
| 12 - 32     | 2439.1146 | 2438.1073 | 2438.1437 | -0.0363 | 1 K.LRFPAEDEFDLSAHNNHMAK.V    |
| 33 - 43     | 1303.6956 | 1302.6883 | 1302.7183 | -0.0300 | 0 K.VLTPELYAELR.A             |
| 87 - 96     | 1232.5290 | 1231.5218 | 1231.6084 | -0.0867 | 0 K.DLFDPIIEDR.H              |
| 108 - 130   | 2518.1231 | 2517.1158 | 2517.1619 | -0.0461 | 0 K.TDLNPDNLQGGDDLDPNYVLSSR.V |
| 139 - 148   | 1230.5163 | 1229.5090 | 1229.5434 | -0.0344 | 0 R.GFCLPPHCSR.G 2            |
| 157 - 172   | 1586.8058 | 1585.7986 | 1585.8311 | -0.0325 | 0 K.LAVEALSSLDGDLAGR.Y        |
| 224 - 236   | 1657.7886 | 1656.7813 | 1656.8260 | -0.0447 | 0 K.TFLVWVNEEDHLR.V           |
| 253 - 265   | 1557.7692 | 1556.7619 | 1556.7908 | -0.0289 | 0 R.FCTGLTQIETLFK.S           |

268 - 292 2954.4154 2953.4081 2953.3891 0.0191 0

K.DYEFMWNPHLGYILTCPSNLGTGLR.A

321 - 341 1964.8961 1963.8889 1963.9234 -0.0346 0 R.GTGGVDTAAVGGVFDVSNADR.L  
 342 - 358 1848.9398 1847.9325 1847.9702 -0.0377 0 R.LGFSEVELVQMVDGK.L  
 359 - 366 1031.5316 1030.5243 1030.5481 -0.0238 0 K.LLIEMEQR.L  
 367 - 381 1656.7952 1655.7880 1655.8188 -0.0309 0 R.LEQGQAIDDLMPAQK.-

207 ) L-lactate dehydrogenase B chain

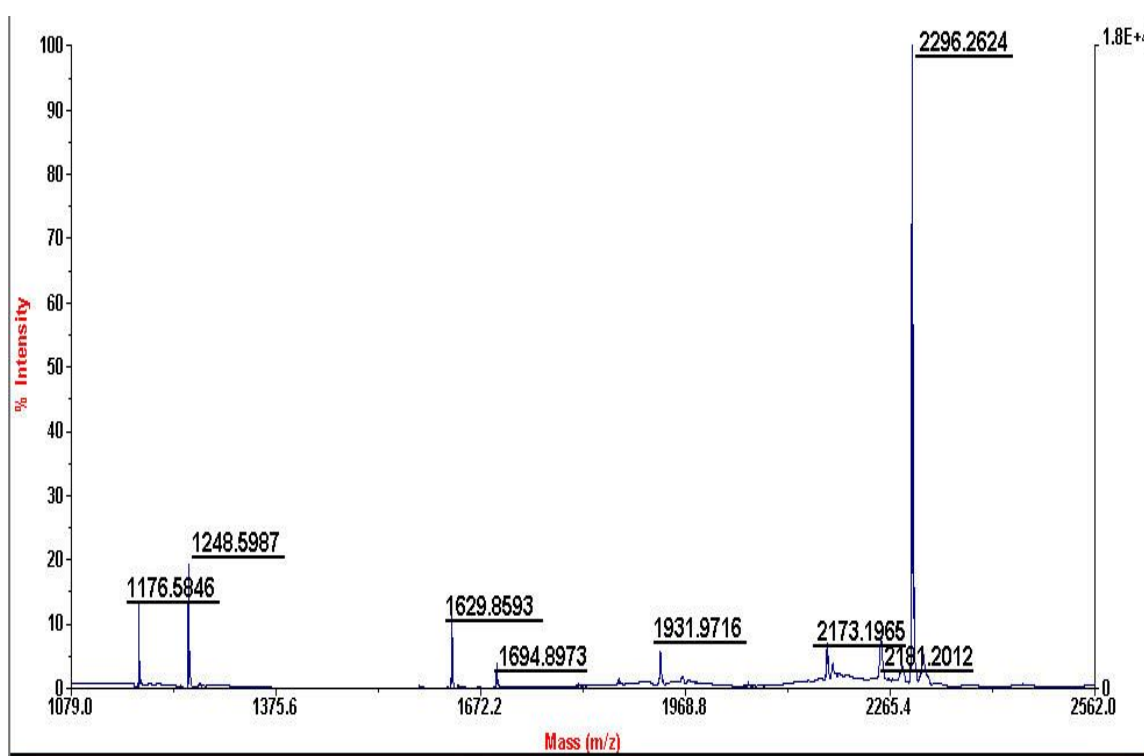

| Start - End | Observed  | Mr(expt)  | Mr(calc)  | Delta   | Miss Sequence              |
|-------------|-----------|-----------|-----------|---------|----------------------------|
| 8 - 23      | 1694.8973 | 1693.8900 | 1693.8886 | 0.0014  | 0 K.LIAPVAEEEEATVPNNK.I    |
| 44 - 58     | 1629.8593 | 1628.8520 | 1628.8508 | 0.0012  | 0 K.SLADELALVDVLEDK.L      |
| 59 - 77     | 2173.1965 | 2172.1892 | 2172.1071 | 0.0821  | 1 K.LKGEMMDLQHGSFLQTPK.I   |
| 61 - 77     | 1931.9716 | 1930.9644 | 1930.9281 | 0.0363  | 0 K.GEMMDLQHGSFLQTPK.I     |
| 159 - 170   | 1248.5987 | 1247.5914 | 1247.5928 | -0.0014 | 0 R.VIGSGCNLDSAR.F         |
| 247 - 266   | 2181.2012 | 2180.1939 | 2180.1187 | 0.0753  | 0 K.GYTNWAIGLSVADLIESMLK.N |
| 280 - 299   | 2296.2624 | 2295.2551 | 2295.1391 | 0.1161  | 0 K.GMYGIENEVFLSLPCILNAR.G |
| 320 - 329   | 1176.5846 | 1175.5773 | 1175.5822 | -0.0049 | 0 K.SADTLWDIQK.D           |

No match to: 2251.3627, 2253.1991

208 ) NG,NG-dimethylarginine dimethylaminohydrolase 1

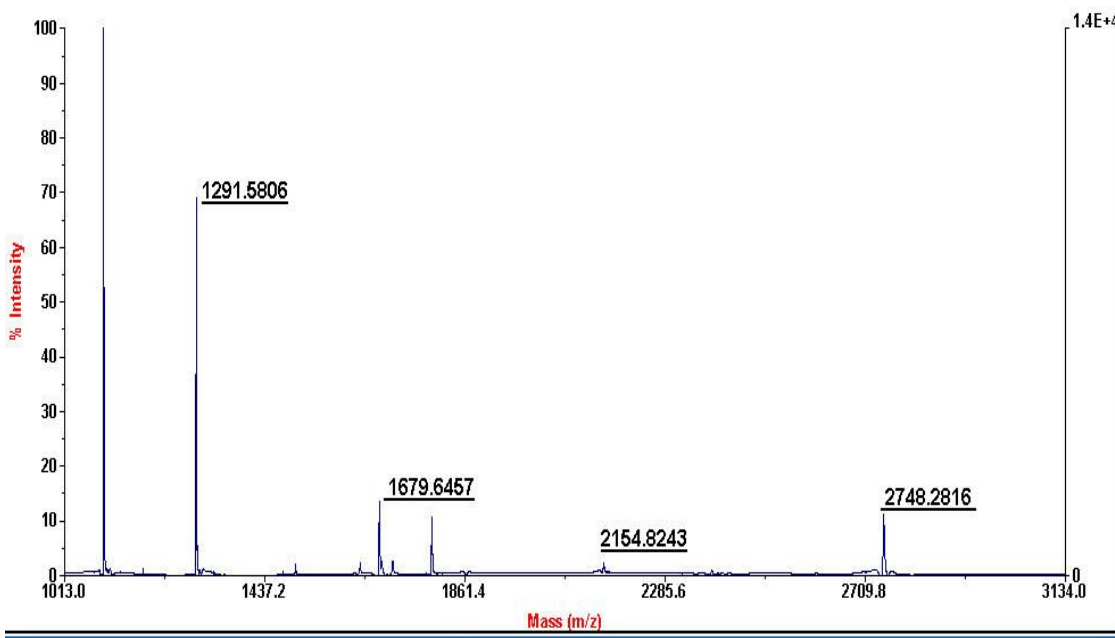

| Start - End                          | Observed  | Mr(expt)  | Mr(calc)  | Delta   | Miss Sequence               |
|--------------------------------------|-----------|-----------|-----------|---------|-----------------------------|
| 20 - 31                              | 1291.5806 | 1290.5733 | 1290.7044 | -0.1311 | 0 R.ALPESLGQHALR.S          |
| 112 - 136                            | 2748.2816 | 2747.2743 | 2747.3799 | -0.1056 | 1                           |
| <b>K.LQLNIVEMKDENATLDGGDVLFTGR.E</b> |           |           |           |         |                             |
| 121 - 136                            | 1679.6457 | 1678.6385 | 1678.7798 | -0.1413 | 0 K.DENATLDGGDVLFTGR.E      |
| 176 - 196                            | 2154.8243 | 2153.8170 | 2154.0085 | -0.1915 | 0 K.SFCSMAGPNLIAIGSSESAQK.A |

No match to: 1095.4432, 1790.7375

209 ) 3'(2'),5'-bisphosphate nucleotidase 1

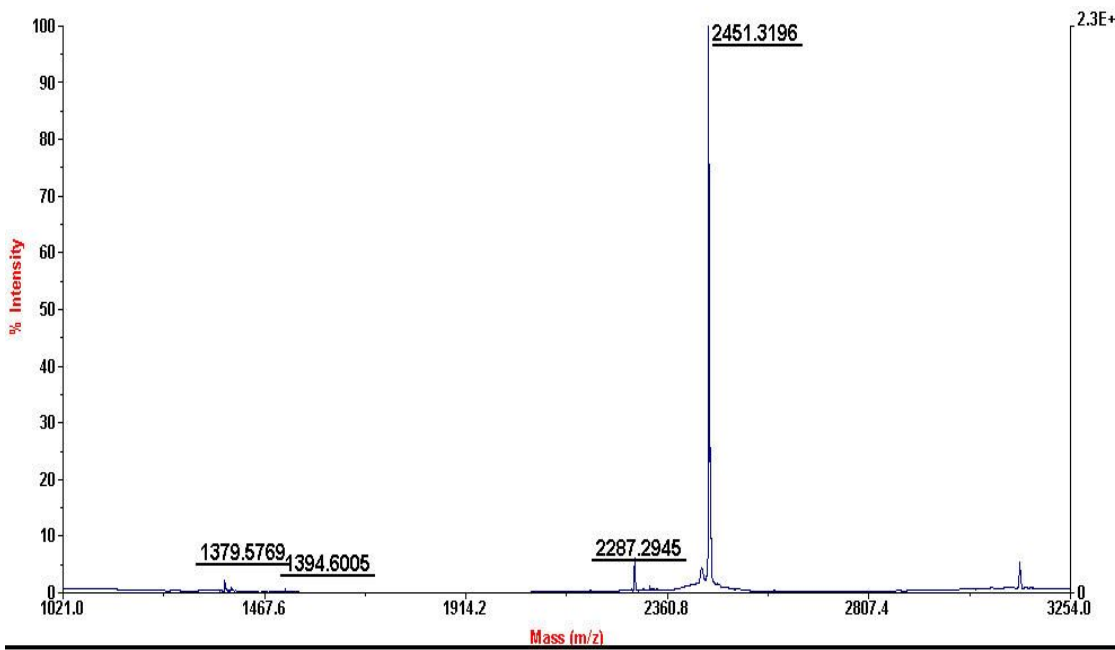

| Start - End | Observed  | Mr(expt)  | Mr(calc)  | Delta   | Miss Sequence                 |
|-------------|-----------|-----------|-----------|---------|-------------------------------|
| 41 - 52     | 1379.5769 | 1378.5696 | 1378.6511 | -0.0815 | 1 K.TCATDLQTKADR.L            |
| 145 - 167   | 2451.3196 | 2450.3123 | 2450.2229 | 0.0894  | 0 K.AIAGVINQPYYNYEAGPDAVLGR.T |
| 190 - 201   | 1394.6005 | 1393.5932 | 1393.7426 | -0.1494 | 1 K.HIITTRSHSNK.L             |
| 202 - 224   | 2287.2945 | 2286.2873 | 2286.1459 | 0.1413  | 1                             |

K.LVTDCVAAMNPDAVLRVGGAGNK.I Oxidation (M)

No match to: 1514.5755, 3140.7915

210 ) Annexin A5



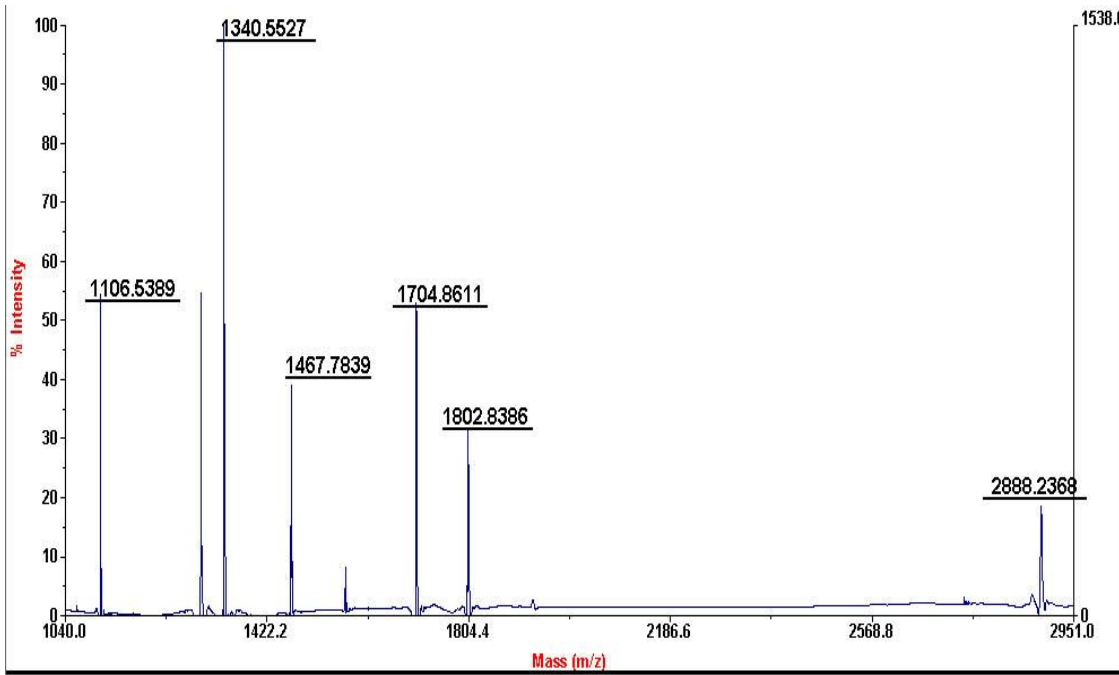

| Start - End                          | Observed  | Mr(expt)  | Mr(calc)  | Delta   | Miss Sequence         |
|--------------------------------------|-----------|-----------|-----------|---------|-----------------------|
| 7 - 18                               | 1340.5527 | 1339.5455 | 1339.6044 | -0.0589 | 0 R.GTVTDFPGFDER.A    |
| 30 - 45                              | 1704.8611 | 1703.8538 | 1703.8941 | -0.0403 | 0 K.GLGTDEESILTLTSR.S |
| 51 - 63                              | 1467.7839 | 1466.7766 | 1466.7881 | -0.0115 | 1 R.QEISAAFKTLFGR.D   |
| 127 - 151                            | 2888.2368 | 2887.2295 | 2887.2307 | -0.0012 | 0                     |
| <b>K.QVYEEYYGSSLEDDVVGDTSGYYQR.M</b> |           |           |           |         |                       |
| 194 - 201                            | 954.5215  | 953.5142  | 953.5334  | -0.0192 | 0 K.FITIFGTR.S        |
| 213 - 227                            | 1802.8386 | 1801.8313 | 1801.8556 | -0.0243 | 0 K.YMTISGFQIEETIDR.E |
| 277 - 285                            | 1106.5389 | 1105.5317 | 1105.5767 | -0.0451 | 0 R.SEIDLFNIR.K       |

No match to: 1062.5389, 1296.6490

211 ) 14-3-3 protein epsilon (14-3-3E)

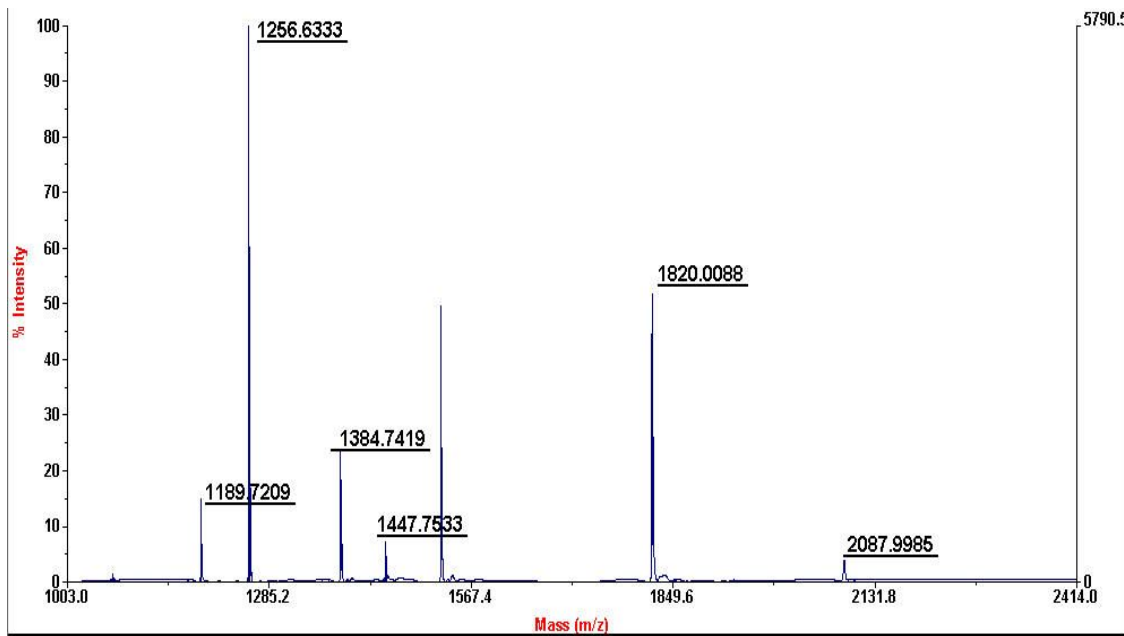

| Start - End | Observed  | Mr(expt)  | Mr(calc)  | Delta  | Miss Sequence             |
|-------------|-----------|-----------|-----------|--------|---------------------------|
| 30 - 42     | 1447.7533 | 1446.7460 | 1446.7024 | 0.0437 | 0 K.VAGMDVELTVEER.N       |
| 131 - 141   | 1256.6333 | 1255.6260 | 1255.5833 | 0.0428 | 0 R.YLAEFATGNDR.K         |
| 131 - 142   | 1384.7419 | 1383.7346 | 1383.6782 | 0.0564 | 1 R.YLAEFATGNDRK.E        |
| 154 - 170   | 1820.0088 | 1819.0015 | 1818.9298 | 0.0717 | 0 K.AASDIAMTELPPTHPIR.L   |
| 197 - 215   | 2087.9985 | 2086.9912 | 2086.9582 | 0.0330 | 0 K.AAFDDAIAELDTLSEESYK.D |
| 216 - 225   | 1189.7209 | 1188.7136 | 1188.6536 | 0.0600 | 0 K.DSTLIMQLLR.D          |

No match to: 1066.1015, 1175.9428, 1524.7420

212 ) 14-3-3 protein zeta/delta (Protein kinase C inhibitor protein 1) (KCIP-1)

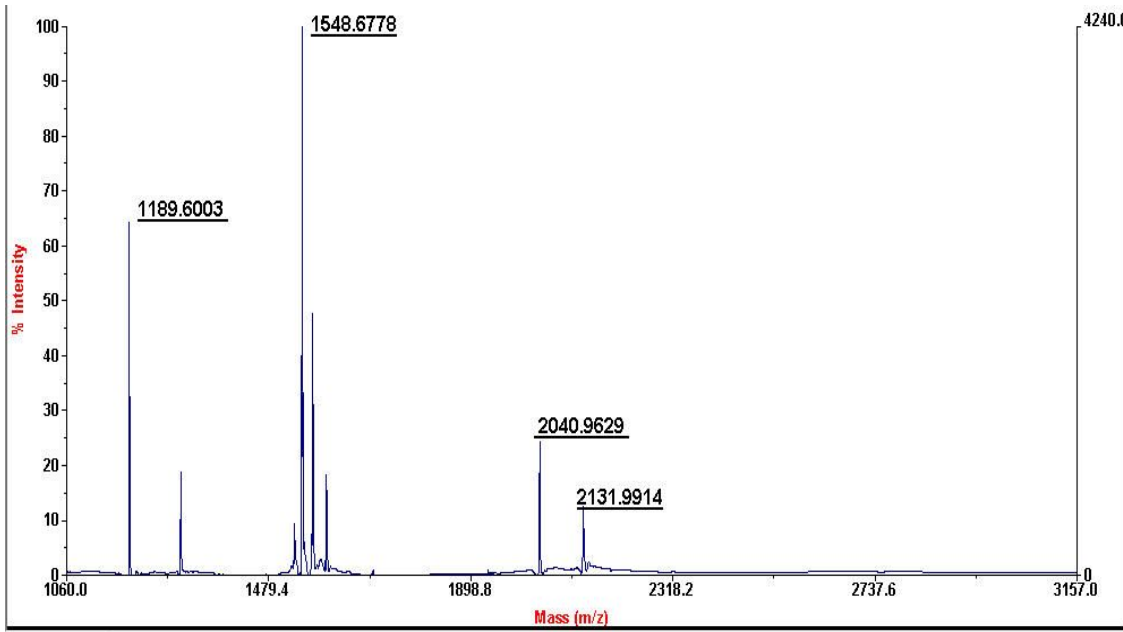

| Start - End | Observed  | Mr(expt)  | Mr(calc)  | Delta   | Miss Sequence             |
|-------------|-----------|-----------|-----------|---------|---------------------------|
| 28 - 41     | 1548.6778 | 1547.6705 | 1547.7063 | -0.0357 | 0 K.SVTEQGAELSNEER.N      |
| 140 - 157   | 2040.9629 | 2039.9556 | 2039.9799 | -0.0243 | 0 K.GIVDQSQQAYQEAFEISK.K  |
| 194 - 212   | 2131.9914 | 2130.9841 | 2130.9844 | -0.0003 | 0 K.TAFDEAIAELDTLSEESYK.D |
| 213 - 222   | 1189.6003 | 1188.5930 | 1188.6536 | -0.0606 | 0 K.DSTLIMQLLR.D          |

No match to: 1296.6143, 1570.6365, 1598.7233

213 ) 14-3-3 protein beta/alpha (Protein kinase C inhibitor protein 1) (KCIP-1) (Protein 1054)

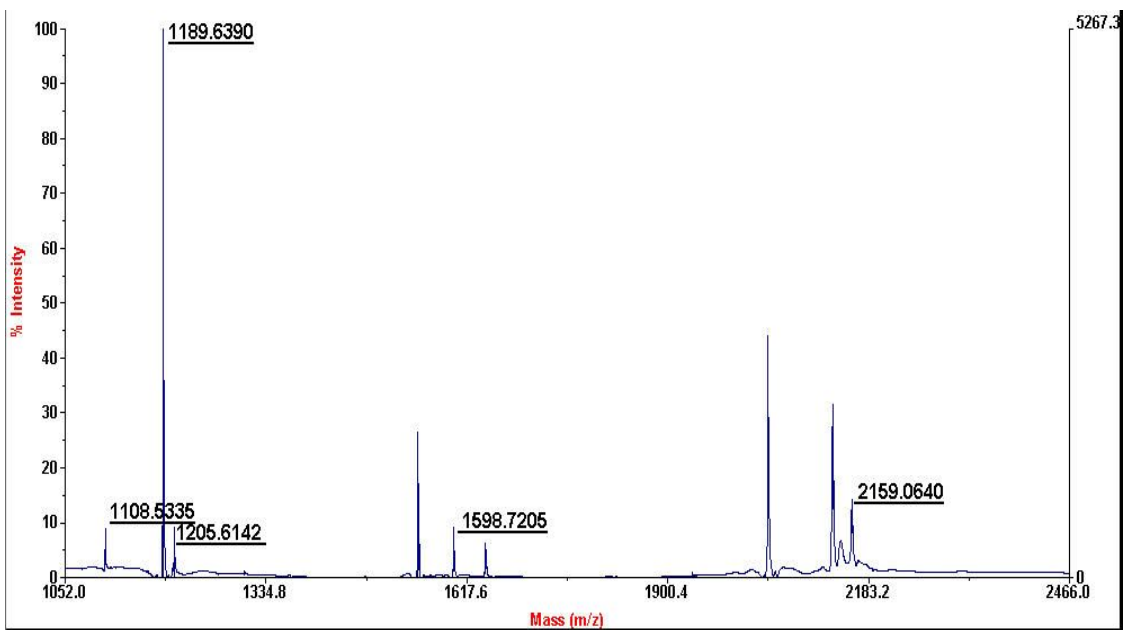

| Start - End | Observed  | Mr(expt)  | Mr(calc)  | Delta   | Miss Sequence                  |
|-------------|-----------|-----------|-----------|---------|--------------------------------|
| 30 - 43     | 1598.7205 | 1597.7133 | 1597.7332 | -0.0199 | 0 K.AVTEQGHLSNEER.N            |
| 141 - 159   | 2159.0640 | 2158.0568 | 2158.0178 | 0.0390  | 0 K.QTTVSNSQQAYQEAFEISK.K      |
| 161 - 169   | 1108.5335 | 1107.5262 | 1107.5495 | -0.0233 | 0 K.EMQPTHPIR.L                |
| 215 - 224   | 1189.6390 | 1188.6317 | 1188.6536 | -0.0219 | 0 K.DSTLIMQLLR.D               |
| 215 - 224   | 1205.6142 | 1204.6070 | 1204.6485 | -0.0416 | 0 K.DSTLIMQLLR.D Oxidation (M) |

No match to: 1548.7029, 2041.0341

214 ) Nuclear pore complex protein Nup160 (Nucleoporin Nup160) (160 kDa nucleoporin)

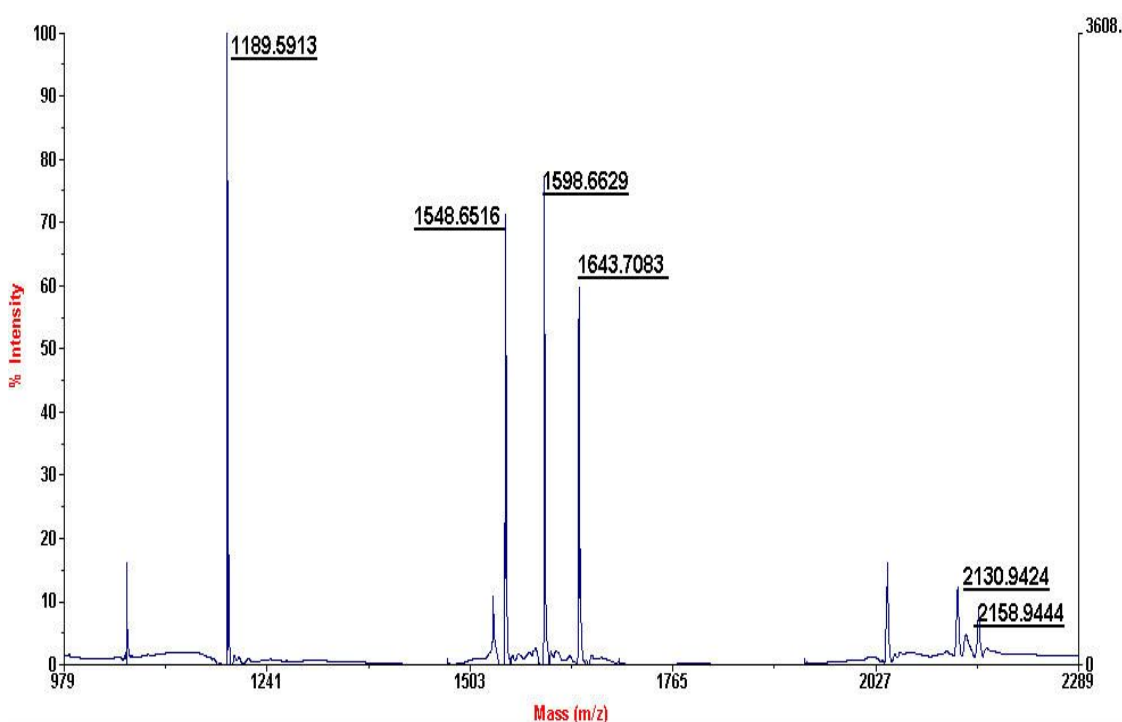

| Start - End   | Observed  | Mr(expt)  | Mr(calc)  | Delta   | Miss Sequence                    |
|---------------|-----------|-----------|-----------|---------|----------------------------------|
| 45 - 59       | 1643.7083 | 1642.7010 | 1642.7150 | -0.0140 | 0 K.YSESAGGFYYVESGK.L            |
| 281 - 298     | 2158.9444 | 2157.9371 | 2158.0182 | -0.0811 | 1 K.EQMCLMVADMLEYVPVKK.D 2       |
| Oxidation (M) |           |           |           |         |                                  |
| 644 - 655     | 1548.6516 | 1547.6443 | 1547.6007 | 0.0436  | 0 R.EMDYETEVEMEK.G Oxidation (M) |
| 915 - 925     | 1189.5913 | 1188.5840 | 1188.5622 | 0.0218  | 0 R.SEDGEIVSTPR.L                |
| 1126 - 1139   | 1598.6629 | 1597.6556 | 1597.7015 | -0.0459 | 1 K.RNHDGECTAAPTNR.Q             |
| 1140 - 1157   | 2130.9424 | 2129.9352 | 2130.0878 | -0.1526 | 1 R.QIEILELEDLEKECSLAR.I         |

No match to: 2040.9201

215 ) Rho GDP-dissociation inhibitor 1 (Rho GDI 1) (Rho-GDI alpha)

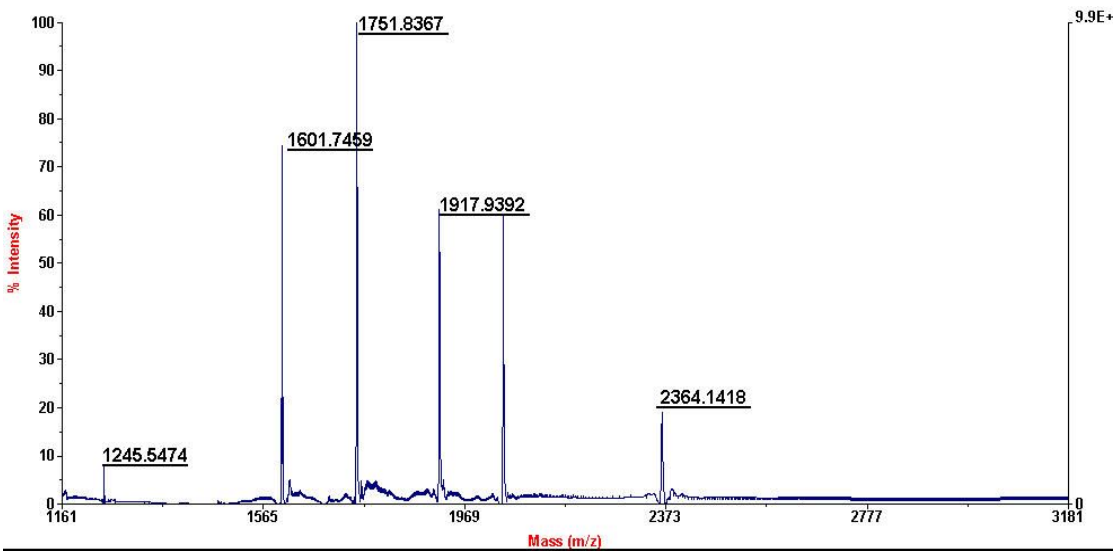

| Start - End | Observed  | Mr(expt)  | Mr(calc)  | Delta   | Miss Sequence             |
|-------------|-----------|-----------|-----------|---------|---------------------------|
| 34 - 49     | 1917.9392 | 1916.9319 | 1916.9327 | -0.0008 | 1 K.SIQEIQELDKDDESLR.K    |
| 128 - 134   | 980.4556  | 979.4483  | 979.4875  | -0.0393 | 0 K.YIQHTYR.K             |
| 139 - 152   | 1601.7459 | 1600.7386 | 1600.7555 | -0.0169 | 1 K.IDKTDYMGVSGPR.A       |
| 142 - 152   | 1245.5474 | 1244.5401 | 1244.5495 | -0.0094 | 0 K.TDYMGVSGPR.A          |
| 153 - 167   | 1751.8367 | 1750.8294 | 1750.8301 | -0.0007 | 0 R.AEEYEFLTPVEEAPK.G     |
| 181 - 199   | 2364.1418 | 2363.1345 | 2363.1070 | 0.0276  | 1 R.FTDDDKTDHLSWEWNLTIK.K |

No match to: 2046.0320

216 ) Kelch-like protein 15

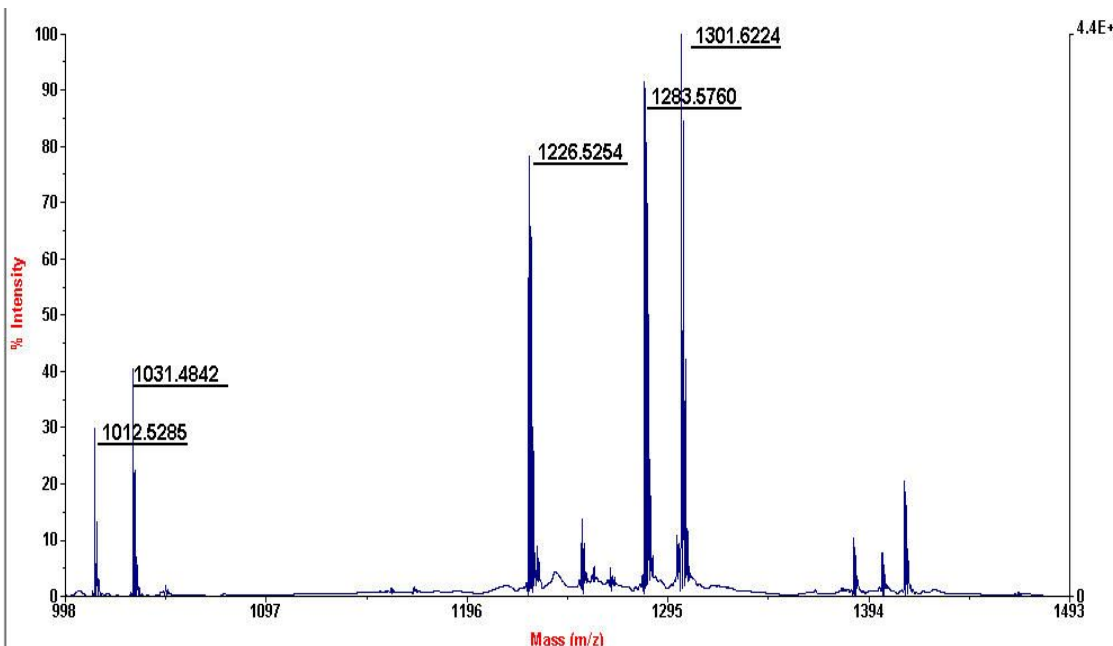

| Start - End | Observed  | Mr(expt)  | Mr(calc)  | Delta   | Miss Sequence                     |
|-------------|-----------|-----------|-----------|---------|-----------------------------------|
| 58 - 67     | 1301.6224 | 1300.6151 | 1300.5904 | 0.0247  | 1 R.IMFTADMRRER.D 2 Oxidation (M) |
| 119 - 127   | 1031.4842 | 1030.4769 | 1030.4980 | -0.0210 | 0 K.FCCSFLAK.I                    |
| 474 - 482   | 1226.5254 | 1225.5181 | 1225.5484 | -0.0303 | 1 K.MNYARCFHK.M                   |
| 533 - 542   | 1012.5285 | 1011.5212 | 1011.5349 | -0.0137 | 0 R.SGHGVTVLDK.Q                  |
| 572 - 581   | 1283.5760 | 1282.5688 | 1282.5322 | 0.0366  | 1 K.EDEYPRMPCK.L Oxidation (M)    |

No match to: 1411.6764, 2202.1581

217 ) Heat-shock protein beta-1 (HspB1)

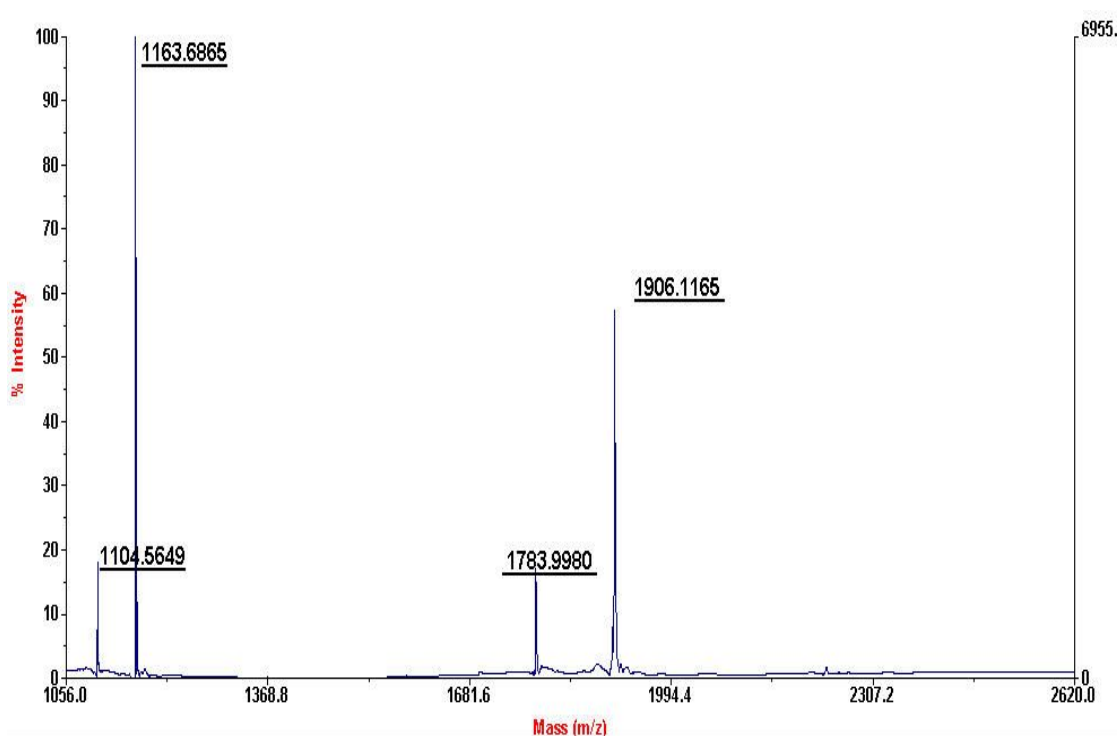

| Start - End | Observed  | Mr(expt)  | Mr(calc)  | Delta  | Miss Sequence           |
|-------------|-----------|-----------|-----------|--------|-------------------------|
| 28 - 37     | 1163.6865 | 1162.6792 | 1162.6134 | 0.0658 | 0 R.LFDQAFGLPR.L        |
| 97 - 112    | 1783.9980 | 1782.9907 | 1782.9152 | 0.0756 | 0 R.VSLDVNHFAPELTVK.T   |
| 128 - 136   | 1104.5649 | 1103.5576 | 1103.4996 | 0.0581 | 0 R.QDEHGYISR.C         |
| 172 - 188   | 1906.1165 | 1905.1092 | 1904.9843 | 0.1249 | 0 K.LATQSNEITIPVTFESR.A |

No match to: 1540.8895, 1805.0752

218 ) Glutathione S-transferase P

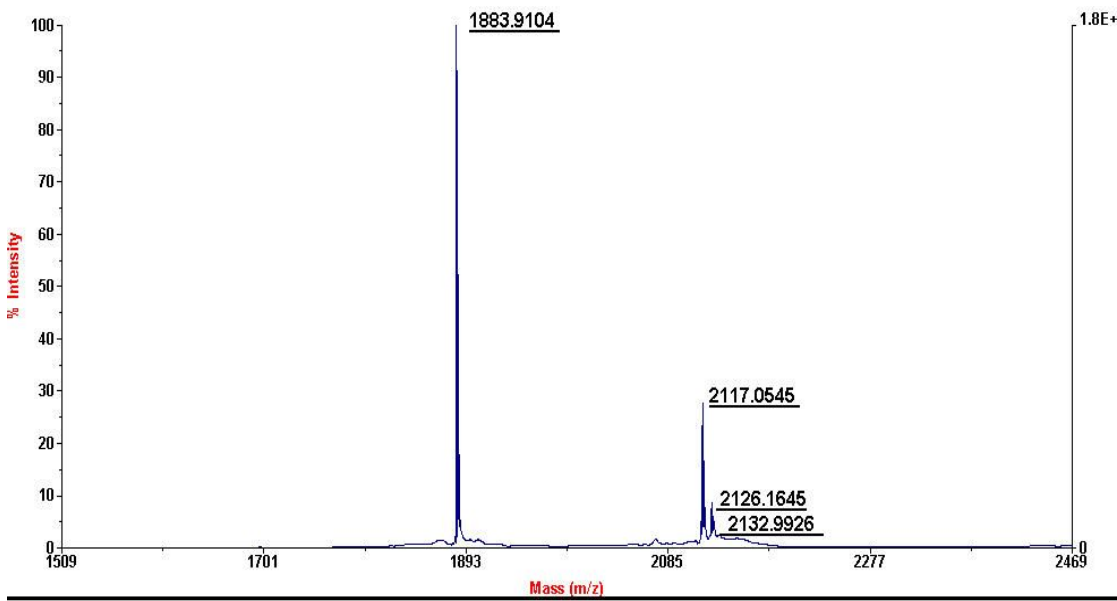

| Start - End   | Observed  | Mr(expt)  | Mr(calc)  | Delta   | Miss Sequence             |
|---------------|-----------|-----------|-----------|---------|---------------------------|
| 56 - 71       | 1883.9104 | 1882.9031 | 1882.9425 | -0.0393 | 0 K.FQDGLTLYQSNTILR.H     |
| 83 - 101      | 2117.0545 | 2116.0473 | 2115.9742 | 0.0731  | 0 K.DQQEALVDMVNDGVEDLR.C  |
| 83 - 101      | 2132.9926 | 2131.9853 | 2131.9691 | 0.0162  | 0 K.DQQEALVDMVNDGVEDLR.C  |
| Oxidation (M) |           |           |           |         |                           |
| 122 - 141     | 2126.1645 | 2125.1573 | 2125.1531 | 0.0042  | 0 K.ALPGQLKPFETLLSQNQGK.T |

219 ) Glutathione transferase omega-1 (EC 2.5.1.18) (GSTO 1-1)

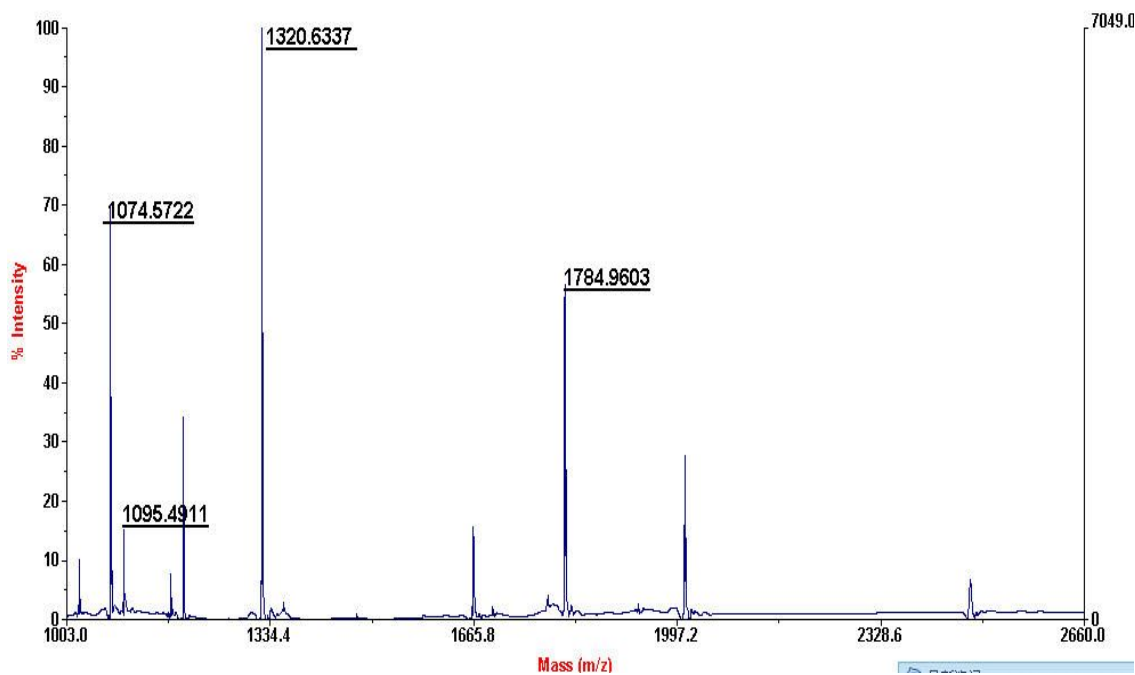

| Start - End | Observed  | Mr(expt)  | Mr(calc)  | Delta   | Miss Sequence         |
|-------------|-----------|-----------|-----------|---------|-----------------------|
| 12 - 25     | 1320.6337 | 1319.6265 | 1319.6833 | -0.0568 | 0 K.GSAPPGPVPEGSIR.I  |
| 31 - 37     | 926.3547  | 925.3474  | 925.4116  | -0.0641 | 0 R.FCPFAER.T         |
| 58 - 65     | 1095.4911 | 1094.4839 | 1094.5549 | -0.0710 | 0 K.NKPEWFFK.K        |
| 123 - 132   | 1074.5722 | 1073.5649 | 1073.6233 | -0.0583 | 0 K.VPSLVGSFIR.S      |
| 184 - 198   | 1784.9603 | 1783.9530 | 1783.8597 | 0.0934  | 1 R.LEAMKLNEDVDHTPK.L |

No match to: 1172.4600, 1192.5948, 1664.8363, 1813.8745, 2009.0417, 2473.2334

220 ) Purine nucleoside phosphorylase (EC 2.4.2.1) (Inosine phosphorylase) (PNP)

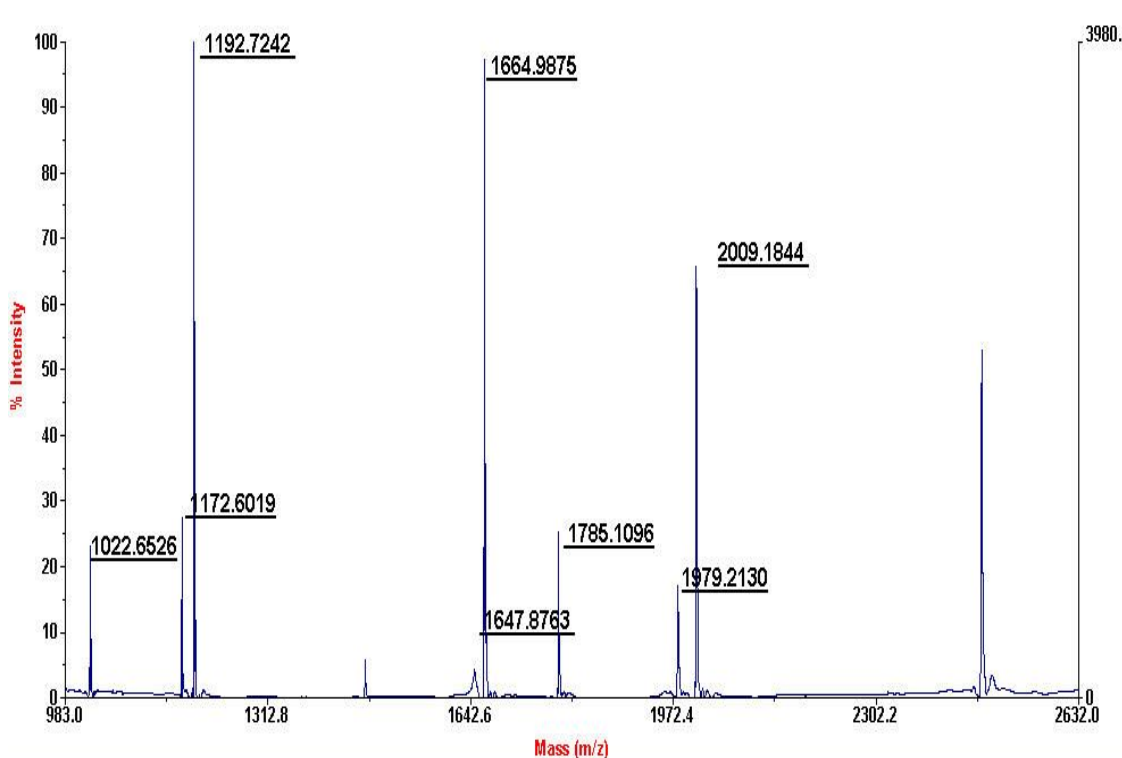

| Start - End | Observed  | Mr(expt)  | Mr(calc)  | Delta  | Miss Sequence            |
|-------------|-----------|-----------|-----------|--------|--------------------------|
| 23 - 41     | 1979.2130 | 1978.2058 | 1978.0418 | 0.1640 | 0 K.HRPQVAIICGSLGGLTDK.L |
| 42 - 58     | 2009.1844 | 2008.1771 | 2008.0054 | 0.1718 | 0 K.LTQAQIFDYGEIPNFPR.S  |
| 68 - 76     | 1022.6526 | 1021.6454 | 1021.5708 | 0.0745 | 0 R.LVFGFLNGR.A          |
| 124 - 133   | 1192.7242 | 1191.7169 | 1191.6321 | 0.0848 | 0 K.FEVDIMLIR.D          |
| 155 - 168   | 1647.8763 | 1646.8691 | 1646.7147 | 0.1544 | 1 R.FGDRFPAMSDAYDR.T     |
| 159 - 168   | 1172.6019 | 1171.5946 | 1171.4968 | 0.0978 | 0 R.FPAMSDAYDR.T         |
| 212 - 229   | 1785.1096 | 1784.1023 | 1783.9501 | 0.1522 | 0 K.LGADAVGMSTVPEVIVAR.H |



255 - 270 1664.9875 1663.9802 1663.8641 0.1161 1 K.ANHEEVLAAGKQAAQK.L

No match to: 2473.3726

221 ) Phosphatidylinositol transfer protein alpha isoform (PtdIns transfer protein alpha) (PtdInsTP) (PI-TP-alpha)

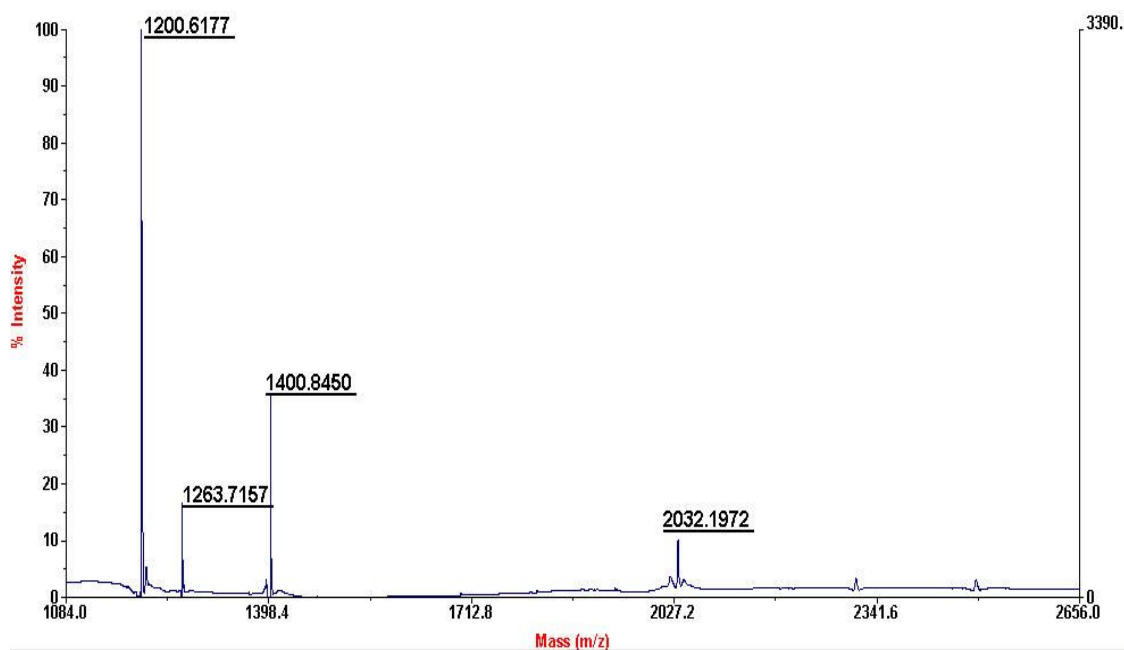

| Start - End | Observed  | Mr(expt)  | Mr(calc)  | Delta  | Miss Sequence            |
|-------------|-----------|-----------|-----------|--------|--------------------------|
| 87 - 95     | 1200.6177 | 1199.6105 | 1199.5182 | 0.0923 | 0 K.AWNAYPYCR.T          |
| 111 - 127   | 2032.1972 | 2031.1900 | 2031.0173 | 0.1726 | 0 K.IETWHKPD LGTQENVHK.L |
| 135 - 146   | 1400.8450 | 1399.8378 | 1399.7095 | 0.1282 | 0 K.HVEAVYIDIADR.S       |
| 220 - 226   | 934.5691  | 933.5618  | 933.4821  | 0.0798 | 0 R.LFTNFHR.Q            |
| 235 - 244   | 1263.7157 | 1262.7084 | 1262.5965 | 0.1119 | 0 K.WVDLTMDDIR.R         |

No match to: 2020.1867, 2494.5846

222 ) Aldose 1-epimerase (EC 5.1.3.3) (Galactose mutarotase) (BLOCK25 protein)

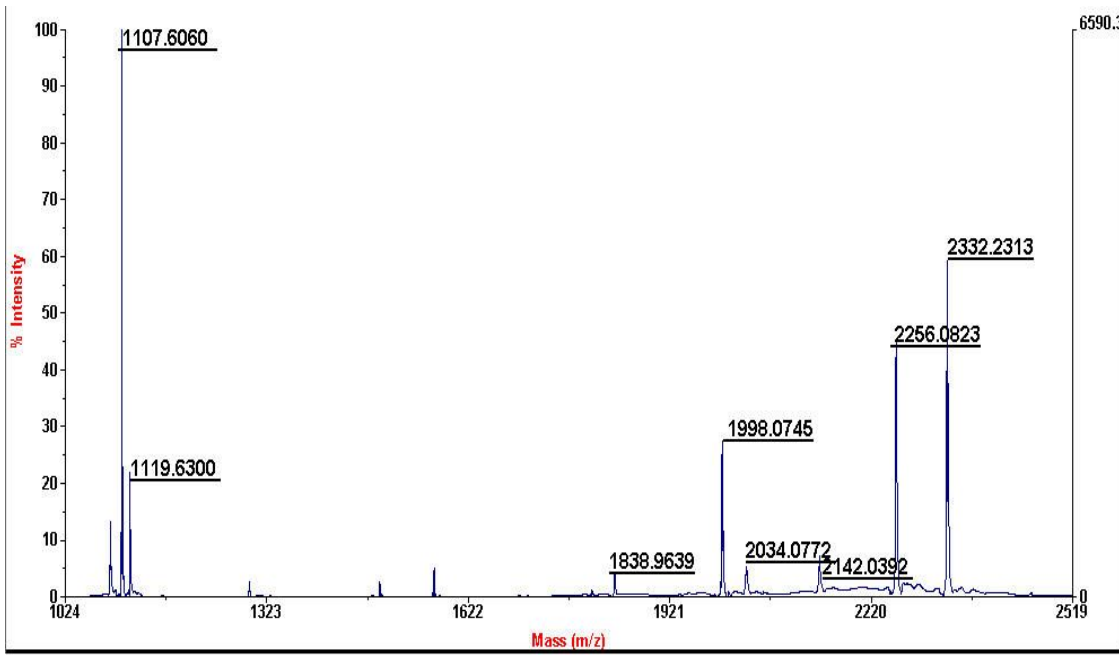

| Start - End | Observed  | Mr(expt)  | Mr(calc)  | Delta  | Miss Sequence              |
|-------------|-----------|-----------|-----------|--------|----------------------------|
| 22 - 30     | 1119.6300 | 1118.6227 | 1118.6084 | 0.0143 | 0 K.FQLQSDLLR.V            |
| 52 - 68     | 1838.9639 | 1837.9567 | 1837.9461 | 0.0106 | 0 R.ASDVVLGFAELEGYLQK.Q    |
| 69 - 78     | 1107.6060 | 1106.5988 | 1106.5872 | 0.0115 | 0 K.QPYFGAVIGR.V           |
| 94 - 111    | 2034.0772 | 2033.0699 | 2033.0442 | 0.0257 | 1 K.EYHLAINKEPNSLHGGVR.G   |
| 146 - 162   | 1998.0745 | 1997.0672 | 1997.0258 | 0.0415 | 0 K.VWVITYTLDGGELIVNYR.A   |
| 233 - 249   | 2142.0392 | 2141.0319 | 2140.9901 | 0.0418 | 0 K.HLQDFHLNGFDHNFCLK.G    |
| 301 - 319   | 2256.0823 | 2255.0750 | 2255.0178 | 0.0573 | 0 K.HSGFCLETQNWPDVAVNQPR.F |
| 320 - 338   | 2332.2313 | 2331.2241 | 2331.1687 | 0.0553 | 0 R.FPPVLLRPGEEDHTTWFK.F   |

No match to: 1090.5799, 1296.7056, 1570.6809, 2691.3954

223 ) F-box only protein 25

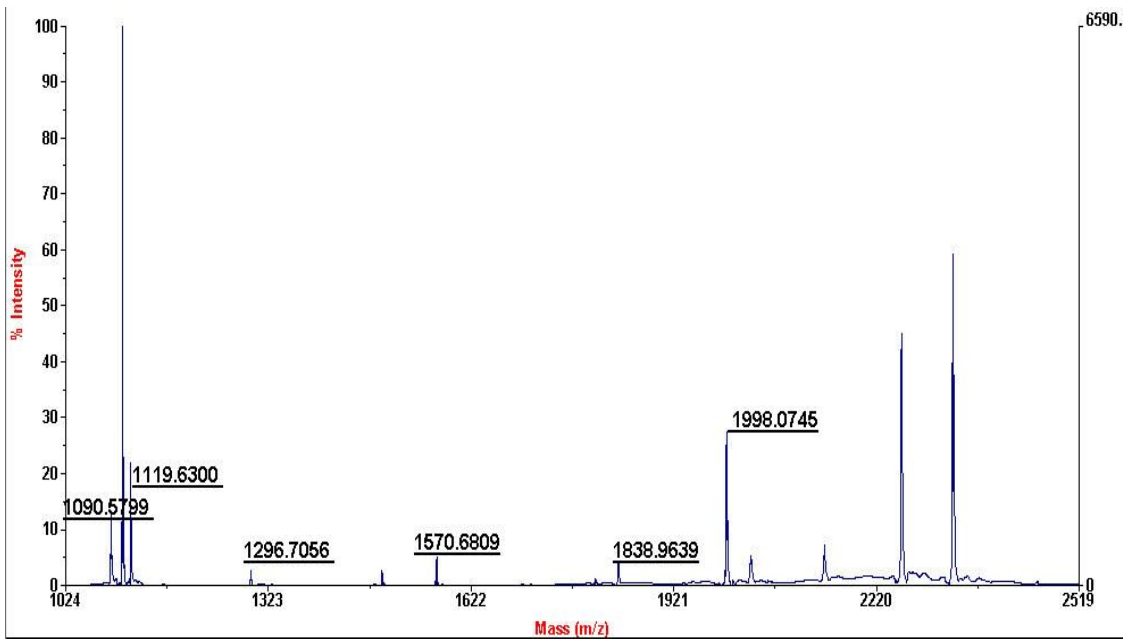

| Start - End | Observed  | Mr(expt)  | Mr(calc)  | Delta   | Miss Sequence             |
|-------------|-----------|-----------|-----------|---------|---------------------------|
| 25 - 34     | 1296.7056 | 1295.6983 | 1295.5598 | 0.1385  | 1 R.CESCSQKLER.E 2        |
| 128 - 146   | 1998.0745 | 1997.0672 | 1997.1884 | -0.1212 | 1 K.LLQLIAKSQLTSLSGVAQK.N |
| 155 - 167   | 1570.6809 | 1569.6736 | 1569.8375 | -0.1640 | 1 K.IVQKVLDDHHNPR.L       |
| 322 - 329   | 1090.5799 | 1089.5726 | 1089.5430 | 0.0297  | 0 R.HCSILFWK.D            |
| 330 - 338   | 1119.6300 | 1118.6227 | 1118.6124 | 0.0103  | 0 K.DYHLALLFK.D           |

No match to: 1107.6060, 1838.9639, 2034.0772, 2142.0392, 2256.0823, 2332.2313, 2691.3954

224 ) Aflatoxin B1 aldehyde reductase member 2 (EC 1.-.-) (AFB1-AR 1) (Aldoketoreductase 7)

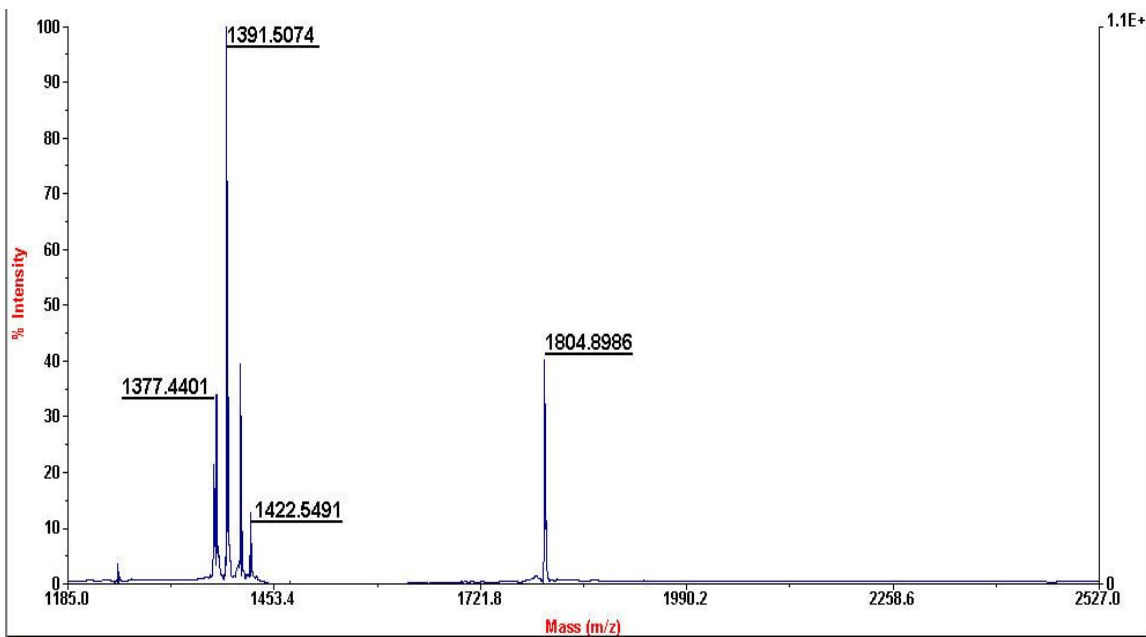

| Start - End | Observed | Mr(expt) | Mr(calc) | Delta | Miss Sequence |
|-------------|----------|----------|----------|-------|---------------|
|-------------|----------|----------|----------|-------|---------------|

|           |           |           |           |         |   |                         |               |
|-----------|-----------|-----------|-----------|---------|---|-------------------------|---------------|
| 38 - 50   | 1422.5491 | 1421.5418 | 1421.7118 | -0.1701 | 1 | R.VASVLGTMEMGRR.M       | Oxidation (M) |
| 206 - 216 | 1391.5074 | 1390.5001 | 1390.6915 | -0.1913 | 0 | R.QVETELFPCLR.H         |               |
| 251 - 261 | 1377.4401 | 1376.4329 | 1376.6149 | -0.1820 | 0 | R.FFGNSWAETYN           |               |
| 279 - 297 | 1804.8986 | 1803.8913 | 1803.9478 | -0.0565 | 0 | K.ALQAAYGASAPSVTSAALR.W |               |

No match to: 1409.4225

225 ) Alcohol dehydrogenase [NADP+] (EC 1.1.1.2) (Aldehyde reductase) (Aldo-keto reductase family 1 member A1)

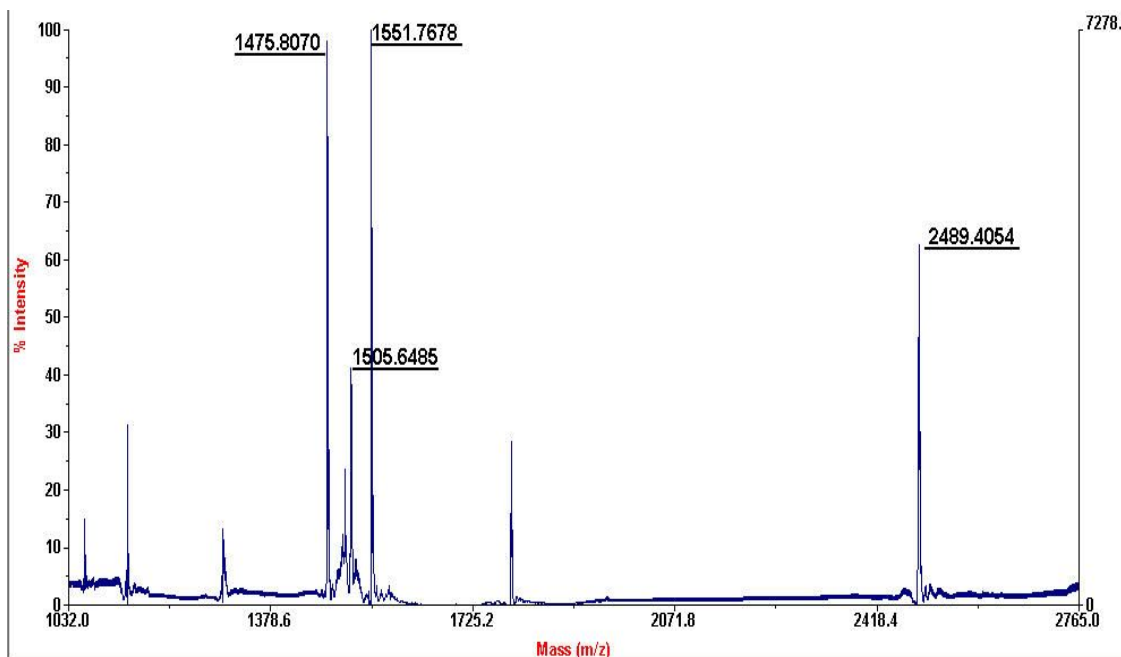

| Start - End | Observed  | Mr(expt)  | Mr(calc)  | Delta   | Miss Sequence                |
|-------------|-----------|-----------|-----------|---------|------------------------------|
| 154 - 167   | 1475.8070 | 1474.7997 | 1474.7892 | 0.0106  | 0 K.GLVQALGLSNFNSR.Q         |
| 204 - 218   | 1551.7678 | 1550.7605 | 1550.7576 | 0.0029  | 0 R.GLEVTAYSPLGSSDR.A        |
| 219 - 240   | 2489.4054 | 2488.3981 | 2488.3213 | 0.0768  | 1 R.AWRDPDEPVLLEEPVVLALAEK.Y |
| 313 - 325   | 1505.6485 | 1504.6412 | 1504.6623 | -0.0211 | 0 R.DAGHPLYPFNDPY.-          |

No match to: 1296.6669

226 ) Isocitrate dehydrogenase [NADP] cytoplasmic (EC 1.1.1.42) (Cytosolic NADP-isocitrate dehydrogenase)

(Oxalosuccinate decarboxylase)

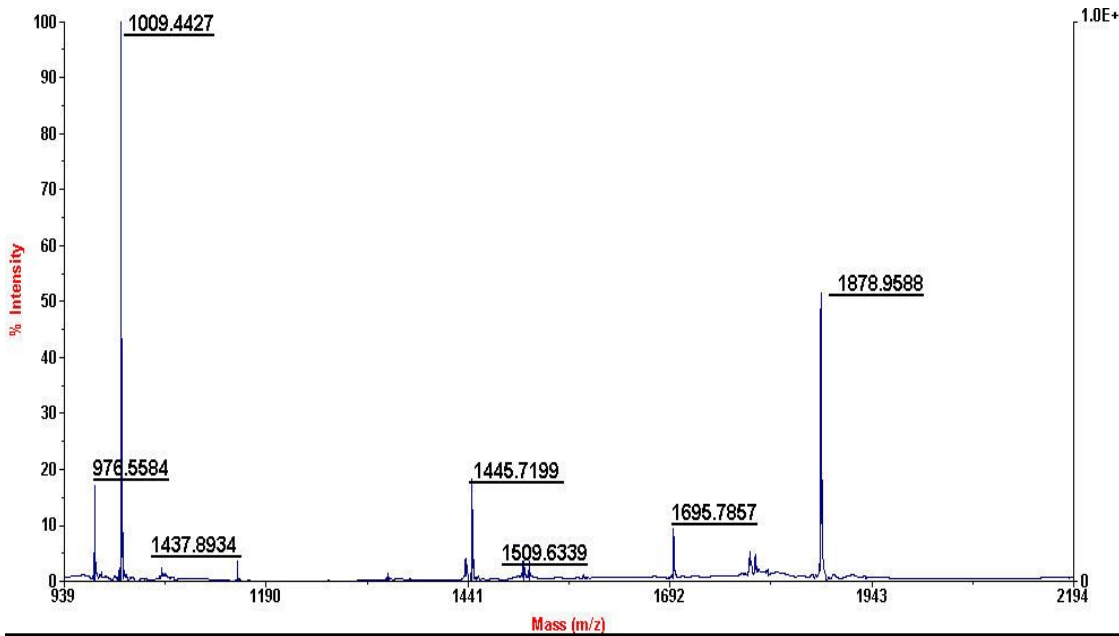

| Start - End | Observed  | Mr(expt)  | Mr(calc)  | Delta   | Miss Sequence              |
|-------------|-----------|-----------|-----------|---------|----------------------------|
| 5 - 20      | 1695.7857 | 1694.7784 | 1694.7603 | 0.0181  | 0 K.ISGGSVVEMQGDEMTR.I     |
| 30 - 49     | 2406.2798 | 2405.2725 | 2405.2266 | 0.0459  | 0 K.LIFPYVELDLHSYDLGIENR.D |
| 101 - 109   | 976.5584  | 975.5511  | 975.5501  | 0.0010  | 0 R.NILGGTVFR.E            |
| 120 - 132   | 1437.8934 | 1436.8862 | 1436.8867 | -0.0005 | 0 R.LVSGWVKPIIIGR.H        |
| 133 - 140   | 1009.4427 | 1008.4354 | 1008.4413 | -0.0059 | 0 R.HAYGDQYR.A             |
| 223 - 233   | 1445.7199 | 1444.7126 | 1444.7238 | -0.0112 | 1 R.FKDIFQEIYDK.Q          |
| 322 - 338   | 1878.9588 | 1877.9515 | 1877.9271 | 0.0244  | 0 K.GQETSTNPIASIFAWTR.G    |
| 389 - 400   | 1509.6339 | 1508.6266 | 1508.6493 | -0.0227 | 0 R.SDYLNTEFEMDK.L         |
| 401 - 408   | 914.5246  | 913.5174  | 913.5596  | -0.0423 | 1 K.LGENLKIK.L             |

No match to: 1790.9201

227 ) Phosphoglycerate kinase 1 (EC 2.7.2.3) (Primer recognition protein 2) (PRP 2)

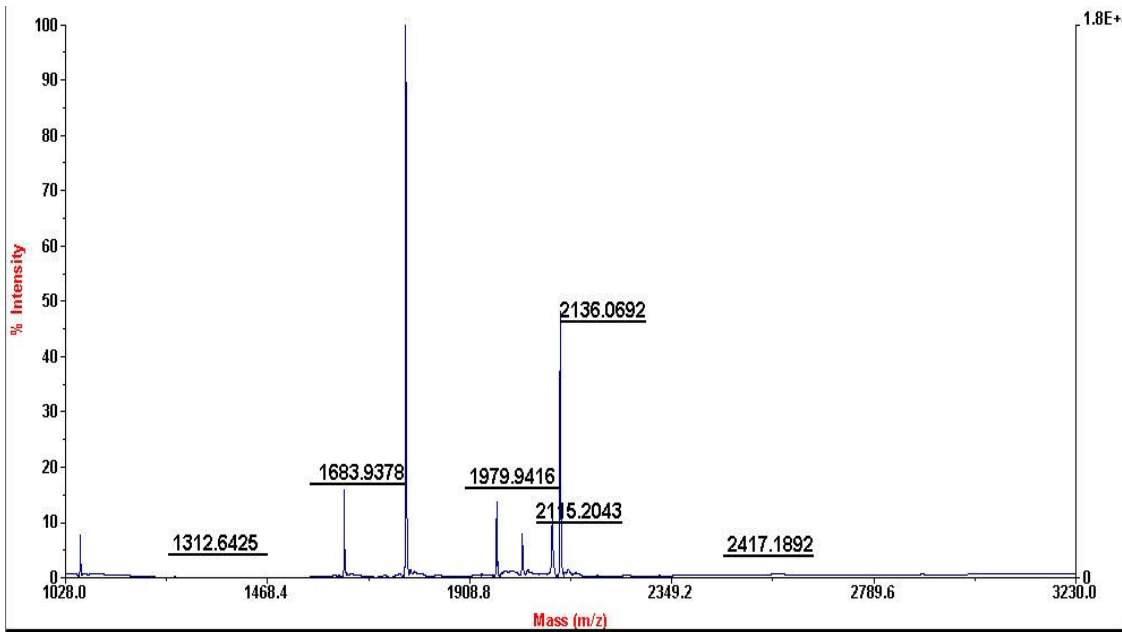

| Start - End                            | Observed  | Mr(expt)  | Mr(calc)  | Delta  | Miss Sequence                |
|----------------------------------------|-----------|-----------|-----------|--------|------------------------------|
| 11 - 21                                | 1312.6425 | 1311.6352 | 1311.5956 | 0.0396 | 0 R.HGESAWNLENR.F            |
| 22 - 39                                | 1979.9416 | 1978.9343 | 1978.8697 | 0.0646 | 0 R.FSGWYDADLSPAGHEEAK.R     |
| 22 - 40                                | 2136.0692 | 2135.0619 | 2134.9708 | 0.0911 | 1 R.FSGWYDADLSPAGHEEAKR.G    |
| 118 - 138                              | 2417.1892 | 2416.1819 | 2416.1045 | 0.0774 | 0 R.SYDVPPPPMEPDHPPFYSNISK.D |
| 142 - 162                              | 2425.2687 | 2424.2614 | 2424.1478 | 0.1136 | 1 R.YADLTEDQLPSCESLKDTIAR.A  |
| 163 - 176                              | 1683.9378 | 1682.9305 | 1682.9031 | 0.0274 | 0 R.ALPFWNEEIVPQIK.E         |
| 196 - 222                              | 3023.6305 | 3022.6232 | 3022.5572 | 0.0660 | 0                            |
| <b>K.HLEGLSEEAIMELNLPTGIPIVYELDK.N</b> |           |           |           |        |                              |
| 223 - 240                              | 2115.2043 | 2114.1970 | 2114.1193 | 0.0777 | 0 K.NLKPIKPMQFLGDEETVR.K     |

No match to: 1060.0786

229) L-lactate dehydrogenase A chain (EC 1.1.1.27)

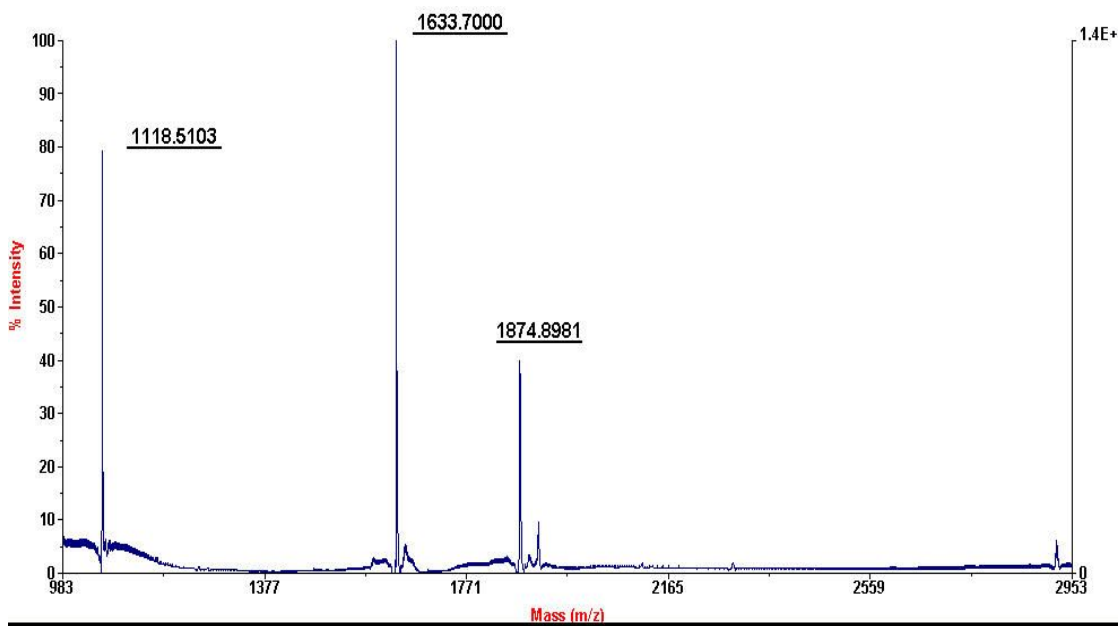

| Start - End | Observed  | Mr(expt)  | Mr(calc)  | Delta   | Miss Sequence         |
|-------------|-----------|-----------|-----------|---------|-----------------------|
| 58 - 73     | 1874.8981 | 1873.8909 | 1873.9542 | -0.0633 | 1 K.LKGEMMDLQHGSFLR.T |
| 60 - 73     | 1633.7000 | 1632.6927 | 1632.7752 | -0.0825 | 0 K.GEMMDLQHGSFLR.T   |
| 91 - 99     | 913.5445  | 912.5372  | 912.5756  | -0.0384 | 0 K.LVIITAGAR.Q       |
| 319 - 328   | 1118.5103 | 1117.5031 | 1117.5768 | -0.0737 | 0 K.SADTLWGIQK.E      |

No match to: 1910.8809

230) Malate dehydrogenase

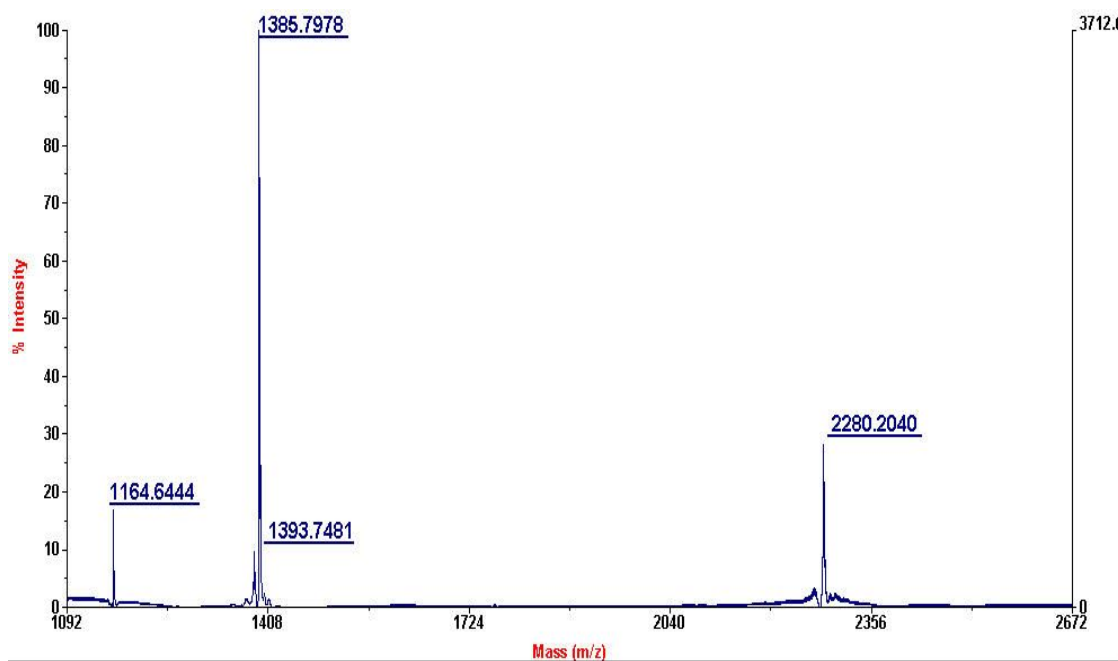

| Start - End | Observed | Mr(expt) | Mr(calc) | Delta | Miss Sequence |
|-------------|----------|----------|----------|-------|---------------|
|-------------|----------|----------|----------|-------|---------------|

|           |           |           |           |        |   |                           |
|-----------|-----------|-----------|-----------|--------|---|---------------------------|
| 80 - 92   | 1385.7978 | 1384.7905 | 1384.7384 | 0.0521 | 0 | K.DLDVAILVGSMPR.R         |
| 180 - 199 | 2280.2040 | 2279.1967 | 2279.1083 | 0.0884 | 0 | K.NVIIWGNHSSTQYPDVNHA.K.V |
| 221 - 230 | 1164.6444 | 1163.6371 | 1163.5934 | 0.0437 | 0 | K.GEFVTTVQQR.G            |
| 299 - 310 | 1393.7481 | 1392.7408 | 1392.7037 | 0.0371 | 0 | K.FVEGLPINDFSR.E          |

No match to: 1763.8559

231) Phosphoglycerate mutase 1

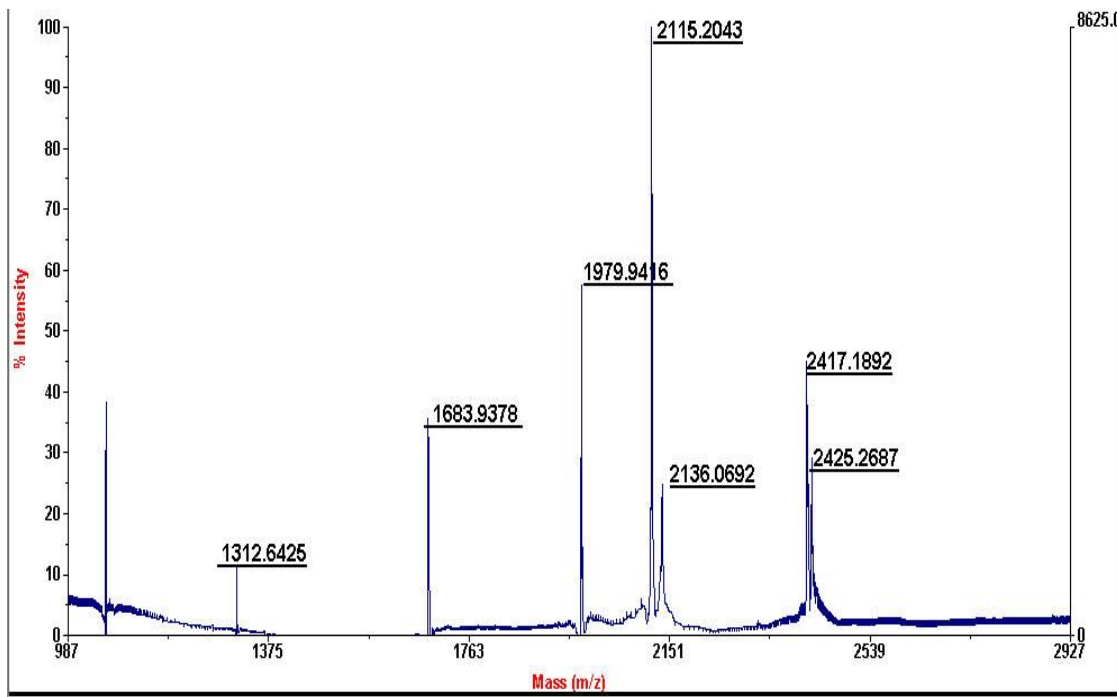

| Start - End                     | Observed  | Mr(expt)  | Mr(calc)  | Delta  | Miss Sequence                |
|---------------------------------|-----------|-----------|-----------|--------|------------------------------|
| 11 - 21                         | 1312.6425 | 1311.6352 | 1311.5956 | 0.0396 | 0 R.HGESAWNLENR.F            |
| 22 - 39                         | 1979.9416 | 1978.9343 | 1978.8697 | 0.0646 | 0 R.FSGWYDADLSPAGHEEAK.R     |
| 22 - 40                         | 2136.0692 | 2135.0619 | 2134.9708 | 0.0911 | 1 R.FSGWYDADLSPAGHEEAKR.G    |
| 118 - 138                       | 2417.1892 | 2416.1819 | 2416.1045 | 0.0774 | 0 R.SYDVPPPPMEPDHHPFYSNISK.D |
| 142 - 162                       | 2425.2687 | 2424.2614 | 2424.1478 | 0.1136 | 1 R.YADLTEDQLPSCESLKDTIAR.A  |
| 163 - 176                       | 1683.9378 | 1682.9305 | 1682.9031 | 0.0274 | 0 R.ALPFWNEEIVPQIK.E         |
| 196 - 222                       | 3023.6305 | 3022.6232 | 3022.5572 | 0.0660 | 0                            |
| K.HLEGLSEEAIMELNLPTGIPIVYELDK.N |           |           |           |        |                              |
| 223 - 240                       | 2115.2043 | 2114.1970 | 2114.1193 | 0.0777 | 0 K.NLKPIKPMQFLGDEETVR.K     |



No match to: 1060.0786

232 ) Carbonic anhydrase 3 (EC 4.2.1.1) (Carbonic anhydrase III) (Carbonate dehydratase III) (CA-III)

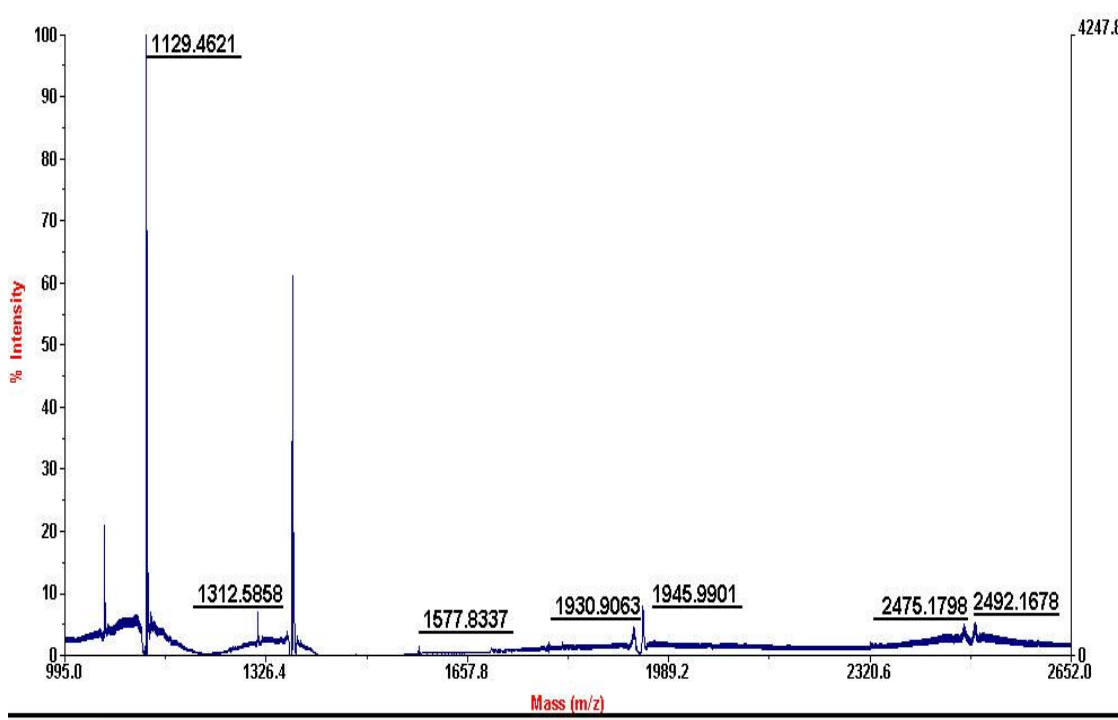

| Start - End | Observed  | Mr(expt)  | Mr(calc)  | Delta   | Miss Sequence                |
|-------------|-----------|-----------|-----------|---------|------------------------------|
| 4 - 24      | 2492.1678 | 2491.1605 | 2491.1093 | 0.0511  | 0 K.EWGYASHNGPDHWHELFPNAK.G  |
| 40 - 57     | 1930.9063 | 1929.8990 | 1929.8857 | 0.0133  | 0 R.HDPSLQPWSVSYDGGSAK.T     |
| 68 - 76     | 1129.4621 | 1128.4548 | 1128.5087 | -0.0540 | 0 R.VVFDDTYDR.S              |
| 81 - 89     | 913.4232  | 912.4159  | 912.4817  | -0.0658 | 0 R.GGPLPGPYR.L              |
| 92 - 113    | 2475.1798 | 2474.1725 | 2474.0999 | 0.0726  | 0 R.QFHLHWGSSDDHGSEHTVDGVK.Y |
| 114 - 126   | 1577.8337 | 1576.8264 | 1576.8150 | 0.0114  | 0 K.YAAELHLVHWNPK.Y          |
| 149 - 165   | 1945.9901 | 1944.9829 | 1944.9581 | 0.0248  | 0 K.IGHENGEFQIFLDALDK.I      |
| 178 - 188   | 1312.5858 | 1311.5785 | 1311.5740 | 0.0045  | 0 K.FDPSCLFPACR.D            |
| 178 - 188   | 1369.5742 | 1368.5669 | 1368.5955 | -0.0285 | 0 K.FDPSCLFPACR.D 2          |
| 227 - 253   | 3011.7293 | 3010.7221 | 3010.5624 | 0.1597  | 0                            |

R.SLLSSAENPPVPLVSNWRPPQPINNR.V

233 ) Cysteine and glycine-rich protein 1

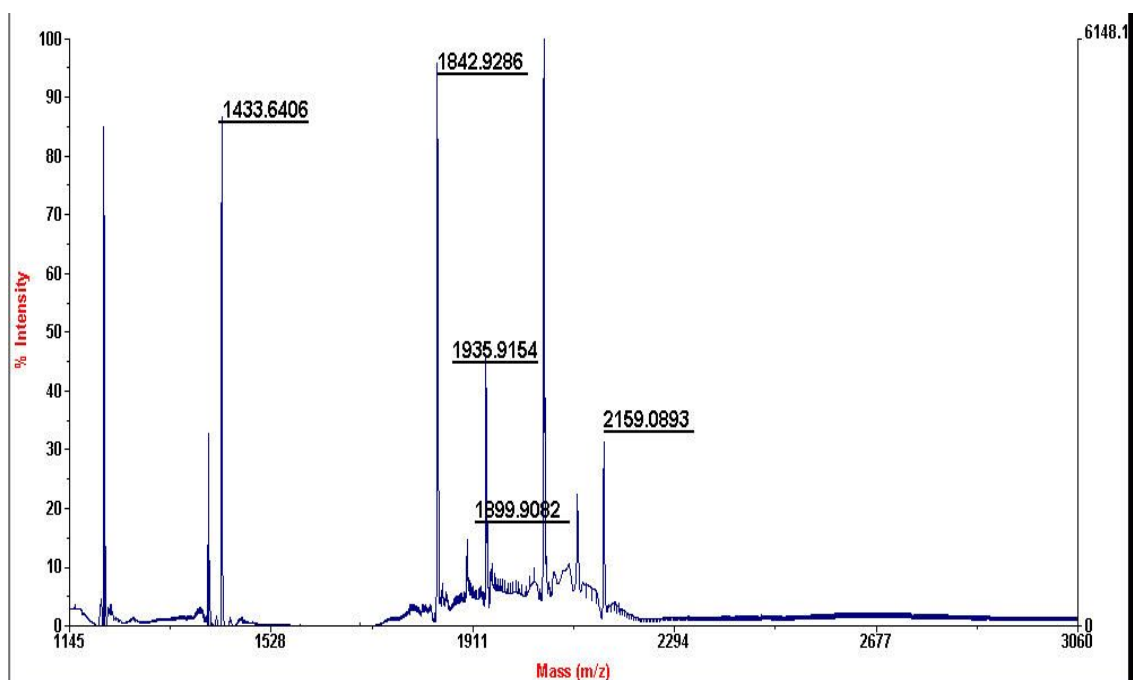

| Start - End | Observed  | Mr(expt)  | Mr(calc)  | Delta   | Miss Sequence                |
|-------------|-----------|-----------|-----------|---------|------------------------------|
| 16 - 32     | 2044.9417 | 2043.9344 | 2043.8996 | 0.0349  | 0 K.TVYFAEEVQCEGNSFHK.S      |
| 43 - 59     | 1935.9154 | 1934.9082 | 1934.9043 | 0.0038  | 0 K.NLDSTTVAVHGEEIYCK.S      |
| 70 - 91     | 2159.0893 | 2158.0820 | 2158.0541 | 0.0279  | 1 K.GYGYGQGAGTLSTDKGESLGIK.H |
| 92 - 108    | 1842.9286 | 1841.9213 | 1841.8768 | 0.0445  | 0 K.HEEAPGHRPTTNPASK.F       |
| 152 - 168   | 1899.9082 | 1898.9009 | 1898.8931 | 0.0078  | 1 K.GLESTTLADKDGEEIYCK.G     |
| 179 - 193   | 1433.6406 | 1432.6334 | 1432.6734 | -0.0401 | 0 K.GFGFGQGAGALVHSE.-        |

No match to: 1059.9851, 1210.5147, 1408.6522, 2109.1015

234 ) Peroxiredoxin-1 (EC 1.11.1.15) (Thioredoxin peroxidase 2)

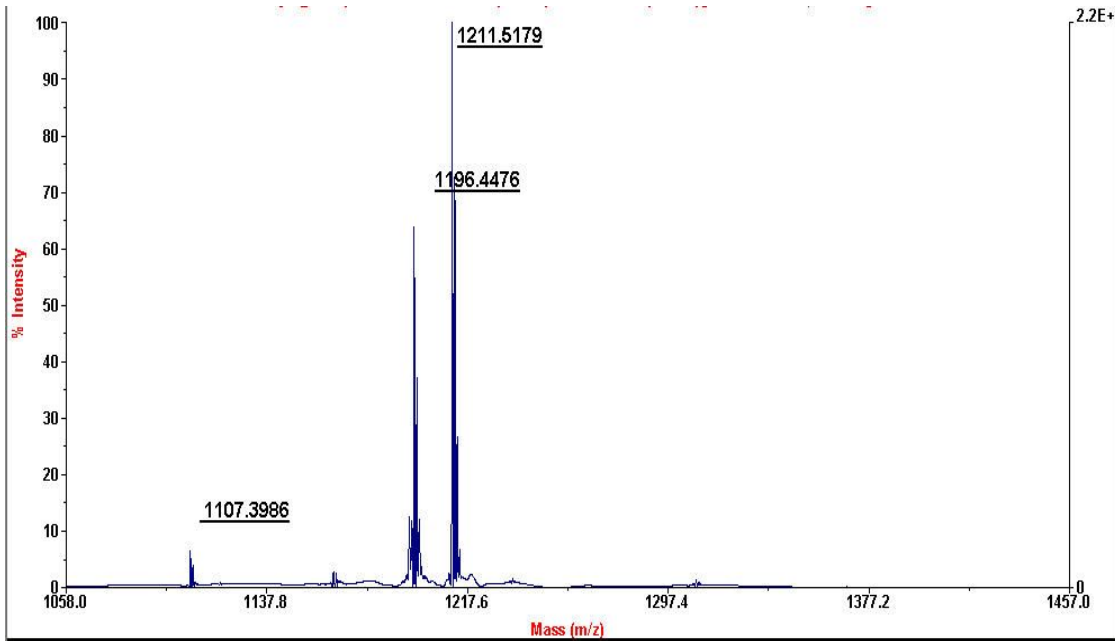

| Start - End | Observed  | Mr(expt)  | Mr(calc)  | Delta   | Miss Sequence     |
|-------------|-----------|-----------|-----------|---------|-------------------|
| 8 - 16      | 980.2871  | 979.2798  | 979.5239  | -0.2441 | 0 K.IGHPAPNFK.A   |
| 111 - 120   | 1107.3986 | 1106.3914 | 1106.5971 | -0.2058 | 0 R.TIAQDYGVLK.A  |
| 141 - 151   | 1211.5179 | 1210.5107 | 1210.6669 | -0.1563 | 0 R.QITVNDLPVGR.S |
| 159 - 168   | 1196.4476 | 1195.4403 | 1195.6237 | -0.1834 | 0 R.LVQAFQFTDK.H  |

No match to: 908.7372, 1194.4832, 2406.5587

235 ) Phosphatidylethanolamine-binding protein 1 (PEBP-1)

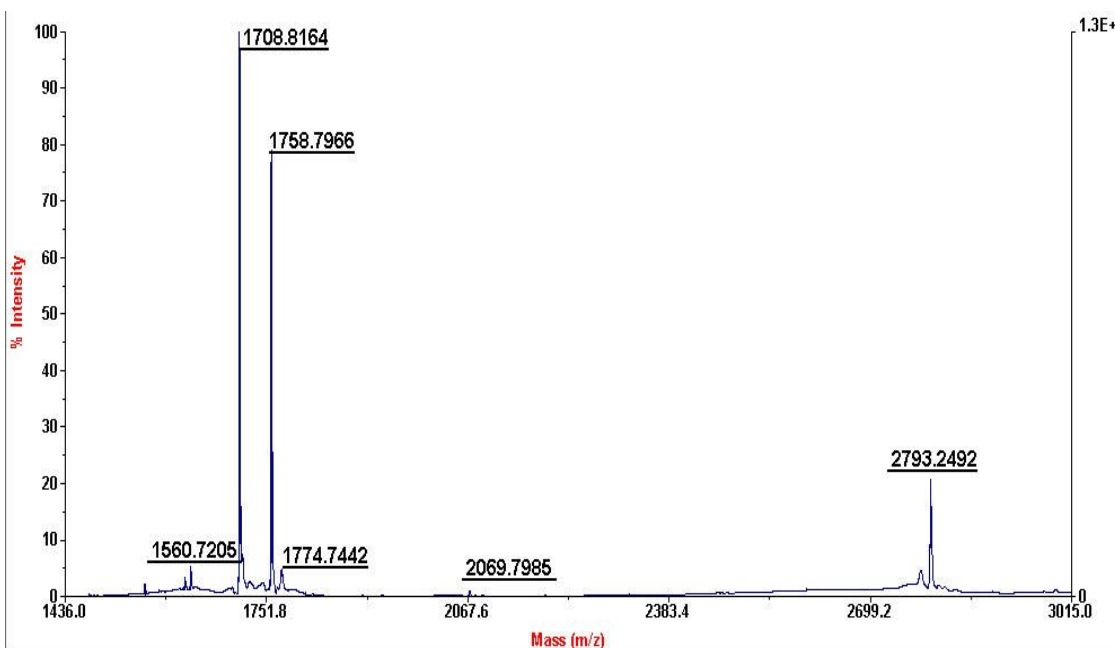

| Start - End | Observed  | Mr(expt)  | Mr(calc)  | Delta   | Miss Sequence                     |
|-------------|-----------|-----------|-----------|---------|-----------------------------------|
| 63 - 76     | 1560.7205 | 1559.7133 | 1559.8195 | -0.1062 | 0 K.LYTLVLTDPDAPSR.K              |
| 81 - 93     | 1758.7966 | 1757.7893 | 1757.8824 | -0.0931 | 1 K.YREWHHFLVVNMK.G               |
| 81 - 93     | 1774.7442 | 1773.7369 | 1773.8773 | -0.1404 | 1 K.YREWHHFLVVNMK.G Oxidation (M) |
| 120 - 132   | 1708.8164 | 1707.8091 | 1707.8984 | -0.0893 | 0 R.YVWLVYEQDRPLK.C               |
| 120 - 141   | 2793.2492 | 2792.2419 | 2792.3955 | -0.1536 | 1 R.YVWLVYEQDRPLKCDEPILSNR.S      |
| 162 - 179   | 2069.7985 | 2068.7912 | 2068.9200 | -0.1288 | 0 R.APVAGTCYQAEWDDYVPK.L          |
| 162 - 187   | 2988.2324 | 2987.2252 | 2987.4010 | -0.1759 | 1                                 |

R.APVAGTCYQAEWDDYVPKLYEQLSGK.-

No match to: 1714.7740

236 ) Protein DJ-1 (Oncogene DJ1)

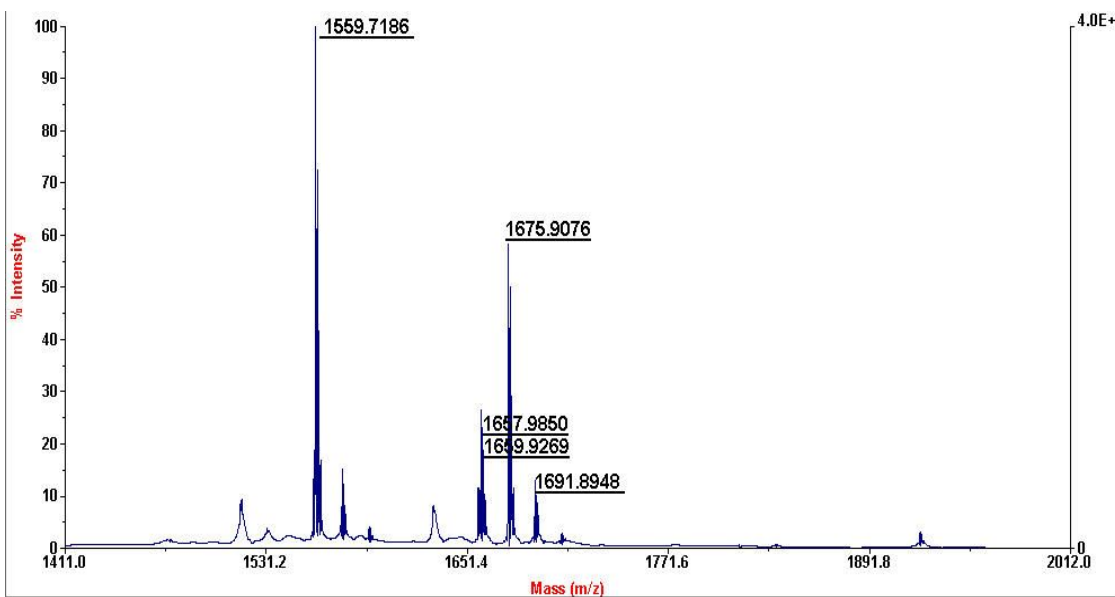

| Start - End | Observed  | Mr(expt)  | Mr(calc)  | Delta  | Miss Sequence                       |
|-------------|-----------|-----------|-----------|--------|-------------------------------------|
| 13 - 27     | 1675.9076 | 1674.9003 | 1674.7956 | 0.1047 | 0 K.GAEEMETVIPVDVMR.R               |
| 13 - 27     | 1691.8948 | 1690.8876 | 1690.7905 | 0.0970 | 0 K.GAEEMETVIPVDVMR.R Oxidation (M) |
| 33 - 48     | 1657.9850 | 1656.9777 | 1656.8617 | 0.1160 | 1 K.VTVAGLAGKDPVQCSR.D              |
| 49 - 63     | 1659.9269 | 1658.9196 | 1658.8185 | 0.1011 | 1 R.DVVICPDASLEDAKK.E               |
| 133 - 145   | 1559.7186 | 1558.7113 | 1558.6292 | 0.0820 | 0 K.MMNGGHYTYSEN.R.V                |

No match to: 1560.7024

237 ) Peroxiredoxin-2

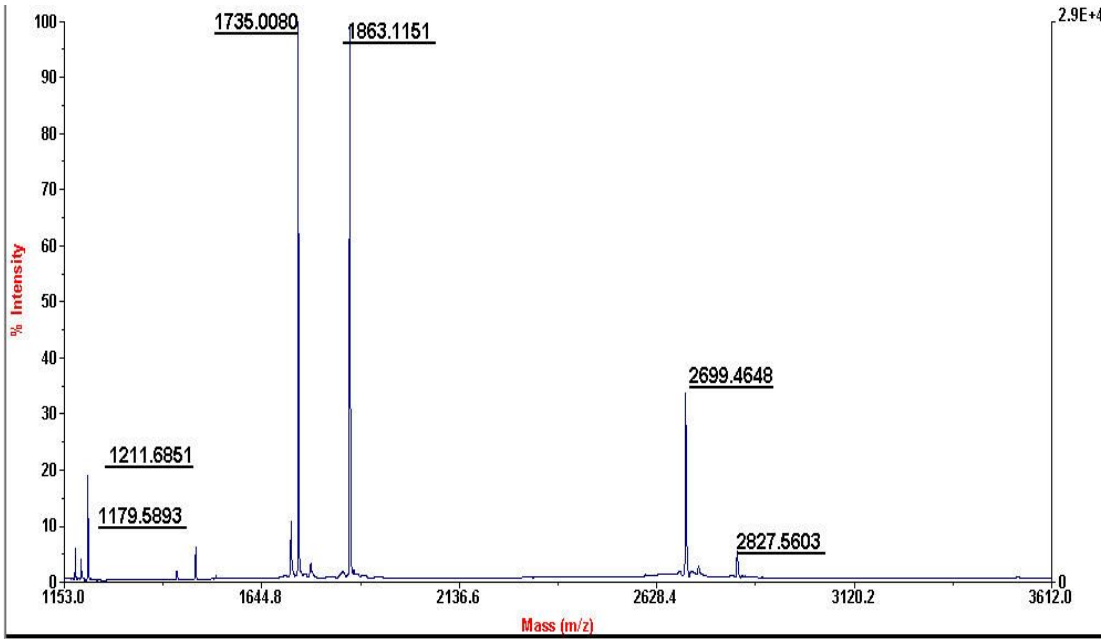

| Start - End                           | Observed  | Mr(expt)  | Mr(calc)  | Delta   | Miss | Sequence               |
|---------------------------------------|-----------|-----------|-----------|---------|------|------------------------|
| 68 - 91                               | 2699.4648 | 2698.4575 | 2698.3537 | 0.1039  | 0    |                        |
| <b>K.LGCEVLGVSVD SQFTHLAWINTPR.K</b>  |           |           |           |         |      |                        |
| 68 - 92                               | 2827.5603 | 2826.5530 | 2826.4486 | 0.1044  | 1    |                        |
| <b>K.LGCEVLGVSVD SQFTHLAWINTPRK.E</b> |           |           |           |         |      |                        |
| 92 - 109                              | 1863.1151 | 1862.1078 | 1862.0625 | 0.0453  | 1    | R.KEGGLGPLNIPLLADVTR.R |
| 93 - 109                              | 1735.0080 | 1734.0007 | 1733.9675 | 0.0332  | 0    | K.EGGLGPLNIPLLADVTR.R  |
| 110 - 119                             | 1179.5893 | 1178.5820 | 1178.6295 | -0.0474 | 1    | R.RLSEYGVK.T           |
| 140 - 150                             | 1211.6851 | 1210.6779 | 1210.6669 | 0.0109  | 0    | R.QITVNDLPVGR.S        |

No match to: 964.4978, 1479.7470, 1716.9998

238 ) Heat-shock protein beta-6 (HspB6)

| Start - End                          | Observed  | Mr(expt)  | Mr(calc)  | Delta   | Miss | Sequence                    |
|--------------------------------------|-----------|-----------|-----------|---------|------|-----------------------------|
| 15 - 27                              | 1193.6699 | 1192.6626 | 1192.6564 | 0.0063  | 0    | R.ASAPLPLSAPGR.L            |
| 33 - 56                              | 2668.3717 | 2667.3644 | 2667.3617 | 0.0027  | 0    | R.FGEGLEAELAALCPTTLAPYYLR.A |
| 57 - 81                              | 2557.3497 | 2556.3424 | 2556.3951 | -0.0527 | 0    |                             |
| <b>R.APSVALPVAQVPTDPGHFSVLLDVK.H</b> |           |           |           |         |      |                             |
| 92 - 102                             | 1231.6512 | 1230.6439 | 1230.6469 | -0.0029 | 0    | K.VVGEHVEVHAR.H             |
| 103 - 115                            | 1578.7363 | 1577.7291 | 1577.7334 | -0.0044 | 0    | R.HEERPDEHGFVAR.E           |

121 - 160 3837.0671 3836.0598 3836.0471 0.0127 1

R.YRLPPGVDPAAVTSALSPEGVLSIQAAPASAQAPPPAAAK.-

No match to: 1593.8570, 1609.8133, 2109.0702

239 ) Casein kinase I isoform alpha (EC 2.7.11.1)

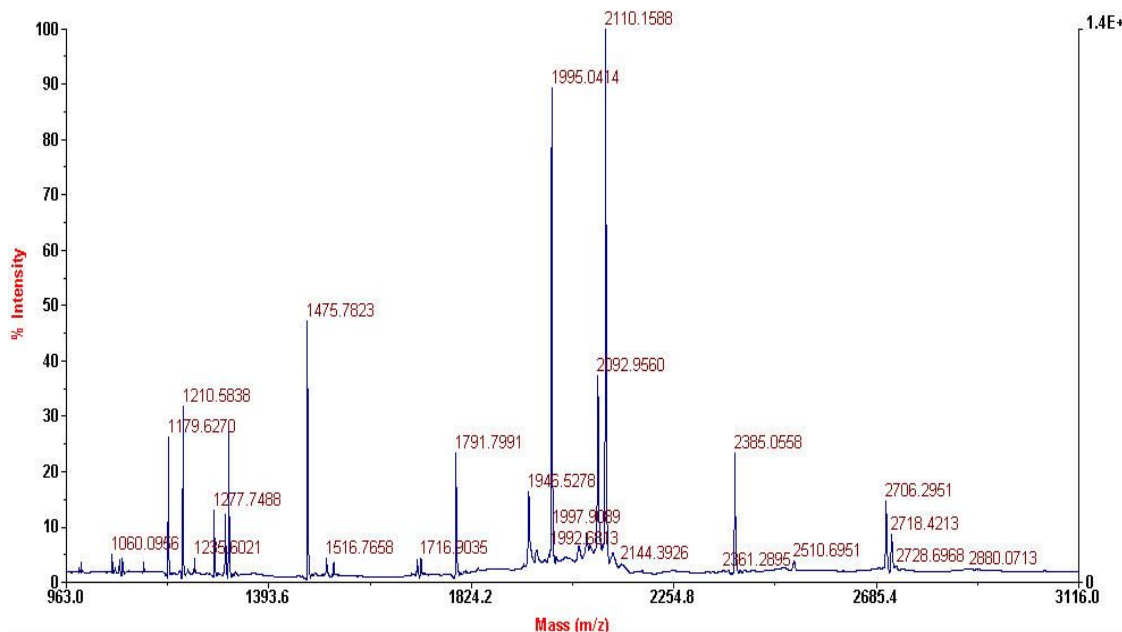

240 ) Histidine triad nucleotide-binding protein 1

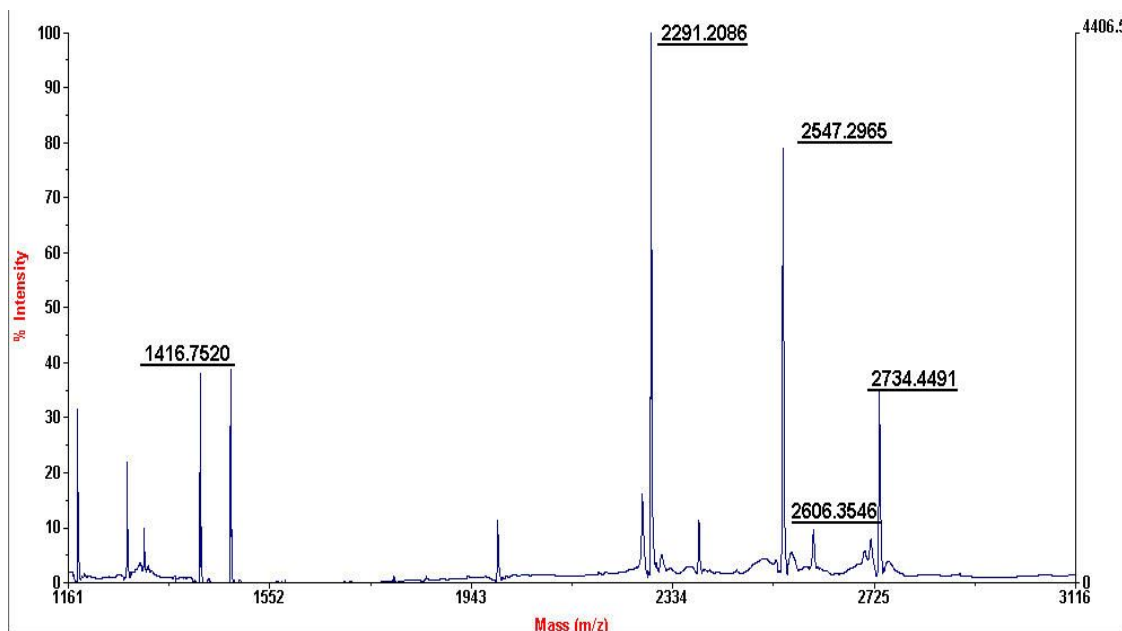

| Start - End | Observed  | Mr(expt)  | Mr(calc)  | Delta   | Miss Sequence              |
|-------------|-----------|-----------|-----------|---------|----------------------------|
| 8 - 21      | 1416.7520 | 1415.7447 | 1415.7520 | -0.0073 | 0 K.AQVARPPGDTIFGK.I       |
| 31 - 37     | 907.4774  | 906.4701  | 906.4447  | 0.0255  | 0 K.IIFEDDR.C              |
| 38 - 57     | 2291.2086 | 2290.2014 | 2290.1932 | 0.0082  | 0 R.CLAFHDISPQAPTHFLVIPK.K |

59 - 82 2606.3546 2605.3473 2605.3057 0.0416 0 K.HISQISVAEDDDDESLLGHLMIVGK.K  
 59 - 83 2734.4491 2733.4419 2733.4007 0.0412 1

K.HISQISVAEDDDDESLLGHLMIVGKK.C

96 - 119 2547.2965 2546.2892 2546.2447 0.0445 0

R.MVVNEGSDGGQSVYHVHLHVLGGR.Q

No match to: 1179.6240, 1274.7542, 1475.7862, 1993.9724, 2274.2064, 2383.9918, 2546.2295

241 ) Destrin

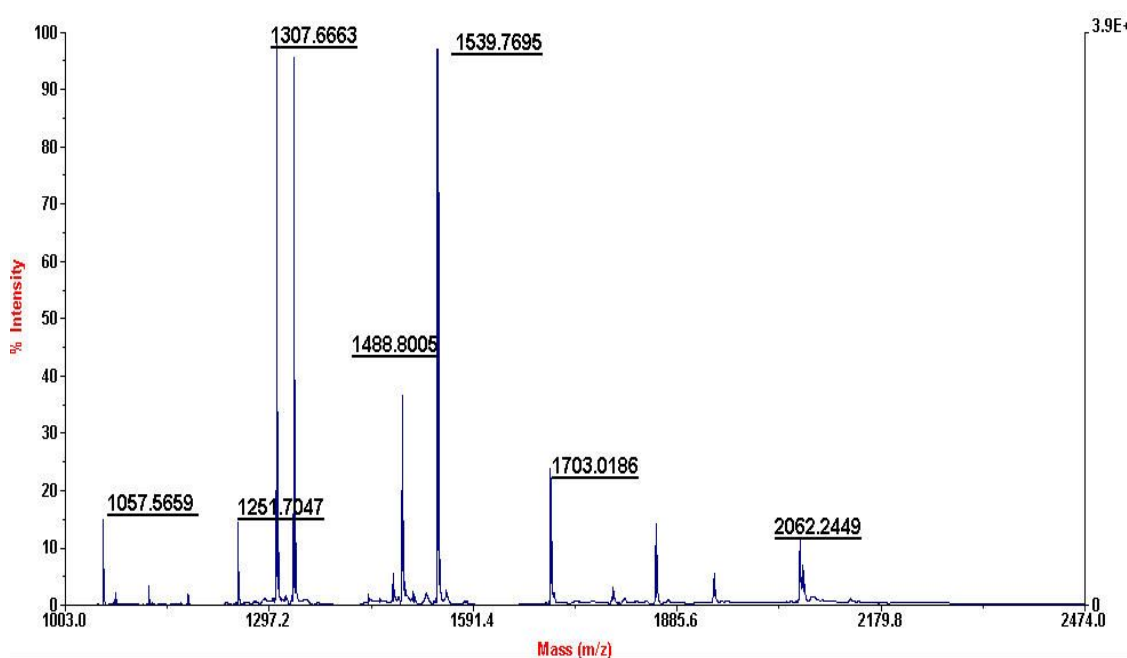

| Start - End | Observed  | Mr(expt)  | Mr(calc)  | Delta  | Miss Sequence           |
|-------------|-----------|-----------|-----------|--------|-------------------------|
| 35 - 45     | 1251.7047 | 1250.6975 | 1250.6692 | 0.0282 | 1 K.AVIFCLSADKK.C       |
| 54 - 69     | 1703.0186 | 1702.0113 | 1701.9188 | 0.0924 | 0 K.EILVGDVGVTTIDPFK.H  |
| 70 - 78     | 1057.5659 | 1056.5586 | 1056.5426 | 0.0160 | 0 K.HFVGMLPEK.D         |
| 70 - 81     | 1488.8005 | 1487.7933 | 1487.7013 | 0.0920 | 1 K.HFVGMLPEKDCR.Y      |
| 82 - 92     | 1307.6663 | 1306.6591 | 1306.6081 | 0.0510 | 0 R.YALYDASFETK.E       |
| 96 - 112    | 2062.2449 | 2061.2377 | 2061.1008 | 0.1368 | 1 R.KEELMFFLWAPELAPLK.S |
| 133 - 145   | 1539.7695 | 1538.7622 | 1538.6532 | 0.1091 | 0 K.HECQANGPEDLNR.A     |

No match to: 1332.6849, 1855.0556

242 ) Serum albumin precursor

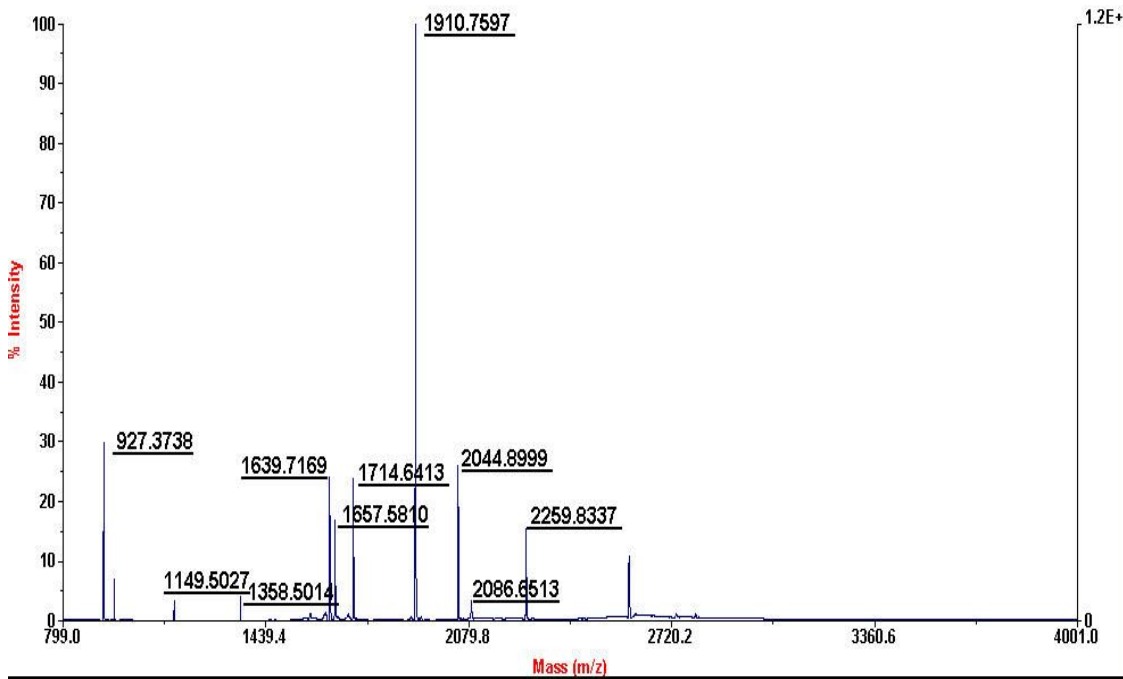

| Start - End | Observed  | Mr(expt)  | Mr(calc)  | Delta   | Miss Sequence                     |
|-------------|-----------|-----------|-----------|---------|-----------------------------------|
| 25 - 34     | 1149.5027 | 1148.4954 | 1148.5686 | -0.0732 | 1 R.DAHKSEVAHR.F                  |
| 118 - 130   | 1714.6413 | 1713.6340 | 1713.7893 | -0.1553 | 1 K.QEPERNECFLQHK.D               |
| 162 - 168   | 927.3738  | 926.3665  | 926.4861  | -0.1196 | 0 K.YLYEIAR.R                     |
| 265 - 281   | 2086.6513 | 2085.6441 | 2085.8303 | -0.1862 | 0 K.VHTECCHGDLLECADDR.A 3         |
| 348 - 360   | 1639.7169 | 1638.7096 | 1638.7752 | -0.0656 | 0 K.DVFLGMFLYEYAR.R Oxidation (M) |
| 397 - 413   | 2044.8999 | 2043.8927 | 2044.0881 | -0.1954 | 0 K.VFDEFKPLVEEPQNLIK.Q           |
| 414 - 426   | 1657.5810 | 1656.5738 | 1656.7453 | -0.1716 | 0 K.QNCELFEQLGEYK.F               |
| 427 - 434   | 960.4481  | 959.4409  | 959.5552  | -0.1144 | 0 K.FQNALLVR.Y                    |
| 509 - 524   | 1910.7597 | 1909.7525 | 1909.9244 | -0.1719 | 0 R.RPCFSALEVDETYVPK.E            |
| 525 - 543   | 2259.8337 | 2258.8264 | 2259.0154 | -0.1890 | 0 K.EFNAETFTFHADICTLSEK.E         |
| 570 - 581   | 1358.5014 | 1357.4941 | 1357.6224 | -0.1283 | 0 K.AVMDDFAAFVEK.C Oxidation (M)  |

No match to: 2584.8715, 2794.0957

243 ) Lamin-A/C



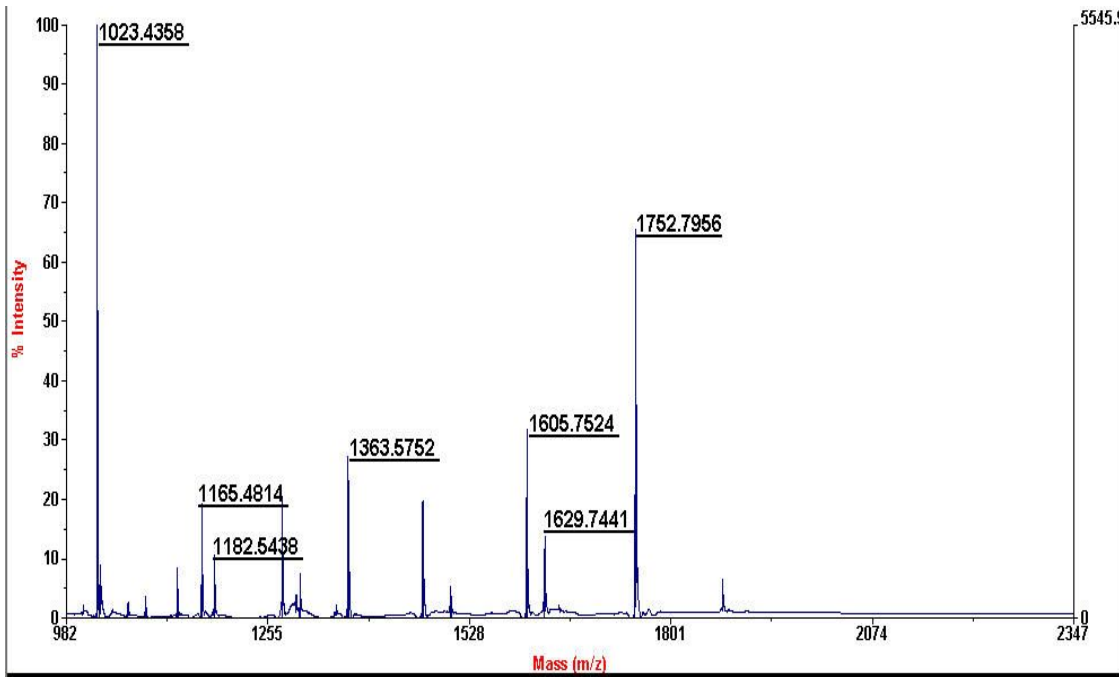

| Start - End | Observed  | Mr(expt)  | Mr(calc)  | Delta   | Miss Sequence         |
|-------------|-----------|-----------|-----------|---------|-----------------------|
| 29 - 41     | 1629.7441 | 1628.7368 | 1628.8005 | -0.0638 | 1 R.LQEKEDLQELNDR.L   |
| 157 - 166   | 1182.5438 | 1181.5365 | 1181.6040 | -0.0675 | 0 R.TLEGELHDLR.G      |
| 209 - 216   | 1023.4358 | 1022.4286 | 1022.5032 | -0.0747 | 0 K.NIYSEELR.E        |
| 281 - 296   | 1752.7956 | 1751.7883 | 1751.8550 | -0.0668 | 0 R.NSNLVGAAHEELQQR.I |
| 428 - 435   | 919.3992  | 918.3919  | 918.4308  | -0.0389 | 0 R.SSFSQHAR.T        |
| 440 - 453   | 1605.7524 | 1604.7452 | 1604.8046 | -0.0594 | 1 R.VAVEEVDEEGKFVRL   |
| 516 - 527   | 1363.5752 | 1362.5679 | 1362.6099 | -0.0419 | 0 K.AQNTWGCNLSLR.T    |
| 655 - 664   | 1165.4814 | 1164.4741 | 1164.4903 | -0.0162 | 0 R.TQSPQNCSIM.-      |

No match to: 1132.5912, 1274.5562, 1298.5668, 1464.6705, 1870.7912, 2899.1743

244 ) Prolargin precursor

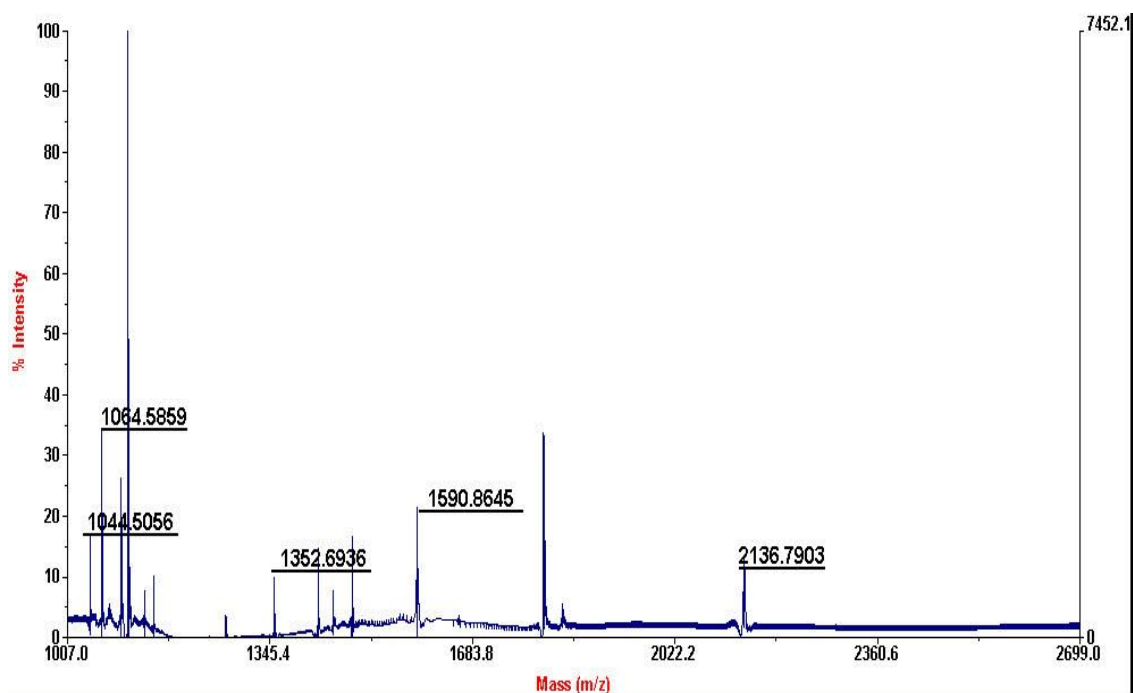

| Start - End | Observed  | Mr(expt)  | Mr(calc)  | Delta   | Miss Sequence             |
|-------------|-----------|-----------|-----------|---------|---------------------------|
| 76 - 92     | 2136.7903 | 2135.7830 | 2135.8387 | -0.0557 | 0 R.ECYCPPDFPSALYCDNR.N 3 |
| 130 - 137   | 1044.5056 | 1043.4984 | 1043.5148 | -0.0165 | 0 R.WINLDNRR.I            |
| 160 - 171   | 1352.6936 | 1351.6863 | 1351.7095 | -0.0232 | 0 K.NQLEEVPSALPR.N        |
| 194 - 206   | 1590.8645 | 1589.8573 | 1589.8889 | -0.0316 | 0 K.LENLLLLDLQHR.L        |
| 264 - 272   | 1064.5859 | 1063.5786 | 1063.5815 | -0.0028 | 0 K.SFPNLAFIR.L           |

No match to: 1096.4923, 1150.5586, 1425.7871, 1482.7074, 1802.7915

245 ) Bifunctional purine biosynthesis protein PURH

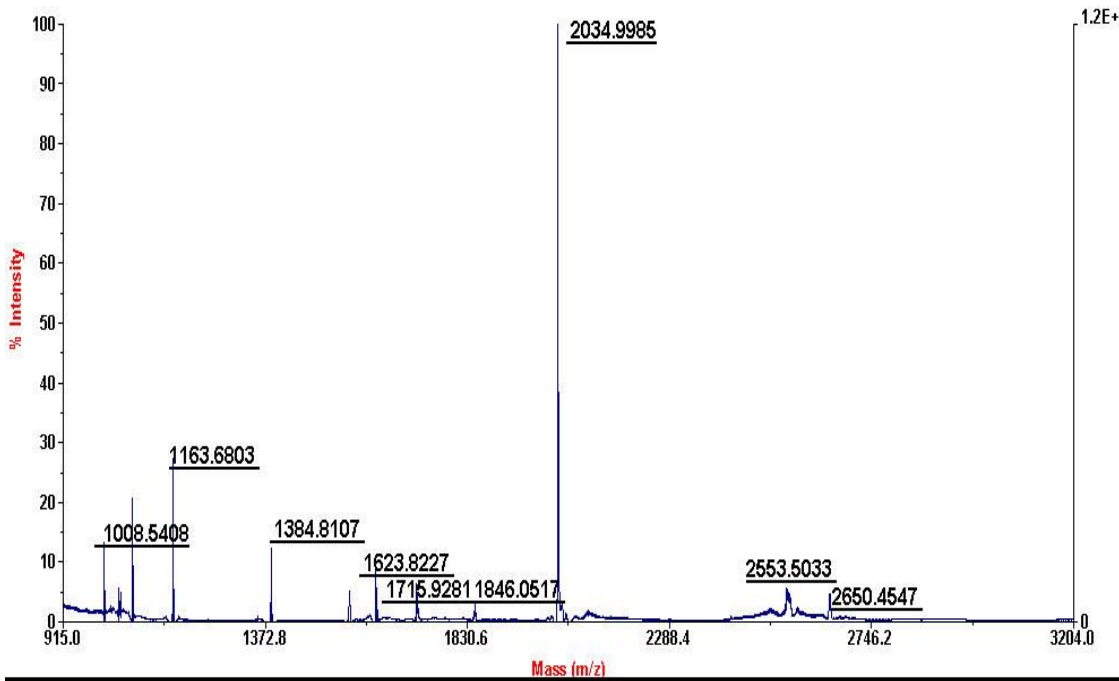

| Start - End                   | Observed  | Mr(expt)  | Mr(calc)  | Delta  | Miss Sequence                   |
|-------------------------------|-----------|-----------|-----------|--------|---------------------------------|
| 50 - 64                       | 1623.8227 | 1622.8154 | 1622.7610 | 0.0544 | 0 R.DVSELTGFPEMLGGR.V Oxidation |
| (M)                           |           |           |           |        |                                 |
| 109 - 133                     | 2553.5033 | 2552.4960 | 2552.3698 | 0.1263 | 0                               |
| K.TVASPGVTVEEAVEQIDIGGVTLRR.A |           |           |           |        |                                 |
| 178 - 194                     | 2034.9985 | 2033.9912 | 2033.9119 | 0.0793 | 0 K.AFTHTAQYDEAISDYFR.K         |
| 295 - 305                     | 1163.6803 | 1162.6730 | 1162.6346 | 0.0384 | 0 K.TLTPISAAAYAR.A              |
| 438 - 451                     | 1384.8107 | 1383.8035 | 1383.7219 | 0.0816 | 0 K.NGQVIGIGAGQQR.I             |
| 462 - 468                     | 1008.5408 | 1007.5335 | 1007.4977 | 0.0358 | 0 K.ANYWWLR.H                   |
| 484 - 507                     | 2650.4547 | 2649.4474 | 2649.3133 | 0.1341 | 1 K.RAEISNAIDQYVTGTIGEDDLIK.W   |
| 510 - 525                     | 1846.0517 | 1845.0444 | 1844.9771 | 0.0673 | 1 K.ALFEVPELLTEAEKK.E           |
| 531 - 545                     | 1715.9281 | 1714.9208 | 1714.8566 | 0.0641 | 0 K.LTEVSISSDAFFPFR.D           |

No match to: 1023.5531, 1040.5391, 1072.5272

246 ) Stress-induced-phosphoprotein 1 (STI1)

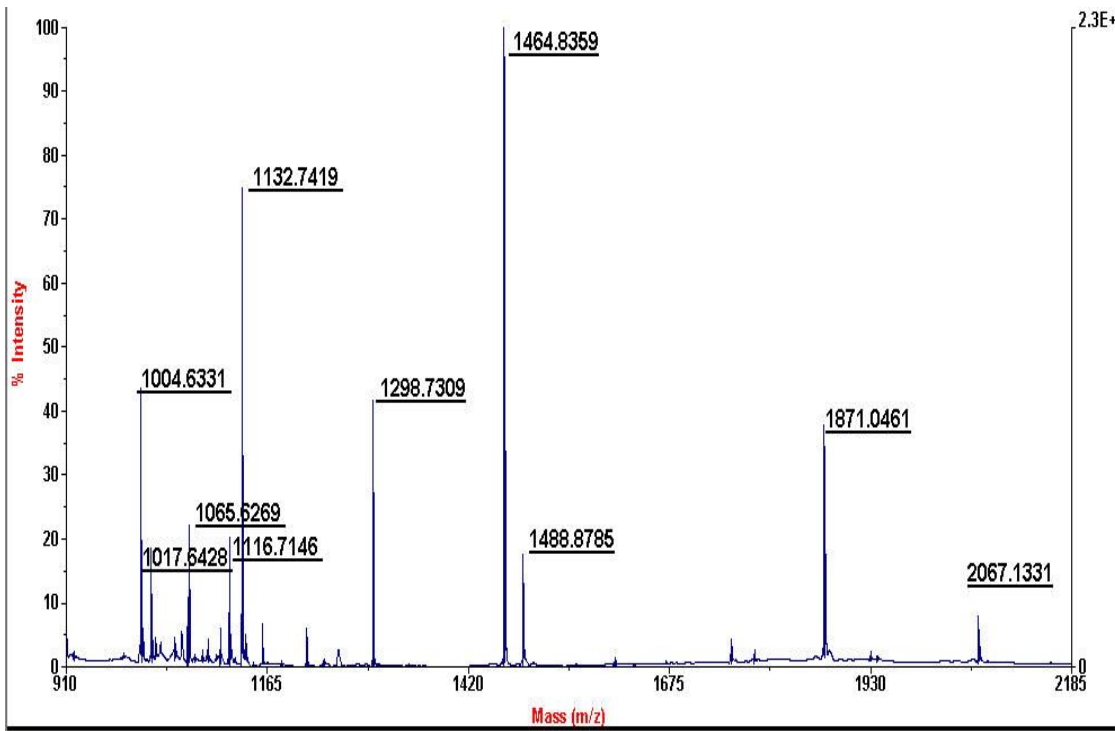

| Start - End | Observed  | Mr(expt)  | Mr(calc)  | Delta  | Miss Sequence                  |
|-------------|-----------|-----------|-----------|--------|--------------------------------|
| 14 - 32     | 2067.1331 | 2066.1258 | 2065.9990 | 0.1268 | 0 K.ALSVGNIDDALQCYSEAIK.L      |
| 33 - 44     | 1464.8359 | 1463.8286 | 1463.7269 | 0.1017 | 0 K.LDPHNHVLYSNR.S             |
| 78 - 87     | 1132.7419 | 1131.7346 | 1131.6400 | 0.0946 | 1 R.KAAALEFLNR.F               |
| 79 - 87     | 1004.6331 | 1003.6258 | 1003.5450 | 0.0808 | 0 K.AAALEFLNR.F                |
| 94 - 109    | 1871.0461 | 1870.0388 | 1869.9220 | 0.1168 | 1 R.TYEEGLKHEANNPQLK.E         |
| 145 - 153   | 1065.6269 | 1064.6196 | 1064.5502 | 0.0694 | 0 R.TLLSDPTYR.E                |
| 154 - 160   | 900.5847  | 899.5774  | 899.5076  | 0.0698 | 0 R.ELIEQLR.N                  |
| 230 - 237   | 909.4850  | 908.4777  | 908.4239  | 0.0538 | 0 K.ELGNDAYK.K                 |
| 316 - 325   | 1298.7309 | 1297.7236 | 1297.6455 | 0.0781 | 1 K.YKDAIHFNK.S                |
| 352 - 364   | 1488.8785 | 1487.8713 | 1487.7871 | 0.0841 | 0 R.LAYINPDLALEEK.N            |
| 382 - 389   | 1017.6428 | 1016.6355 | 1016.5403 | 0.0952 | 1 K.HYTEAIKR.N                 |
| 534 - 543   | 1116.7146 | 1115.7073 | 1115.6373 | 0.0701 | 0 K.LMDVGLIAIR.- Oxidation (M) |

No match to: 1254.9619

247 ) Lamin-A/C

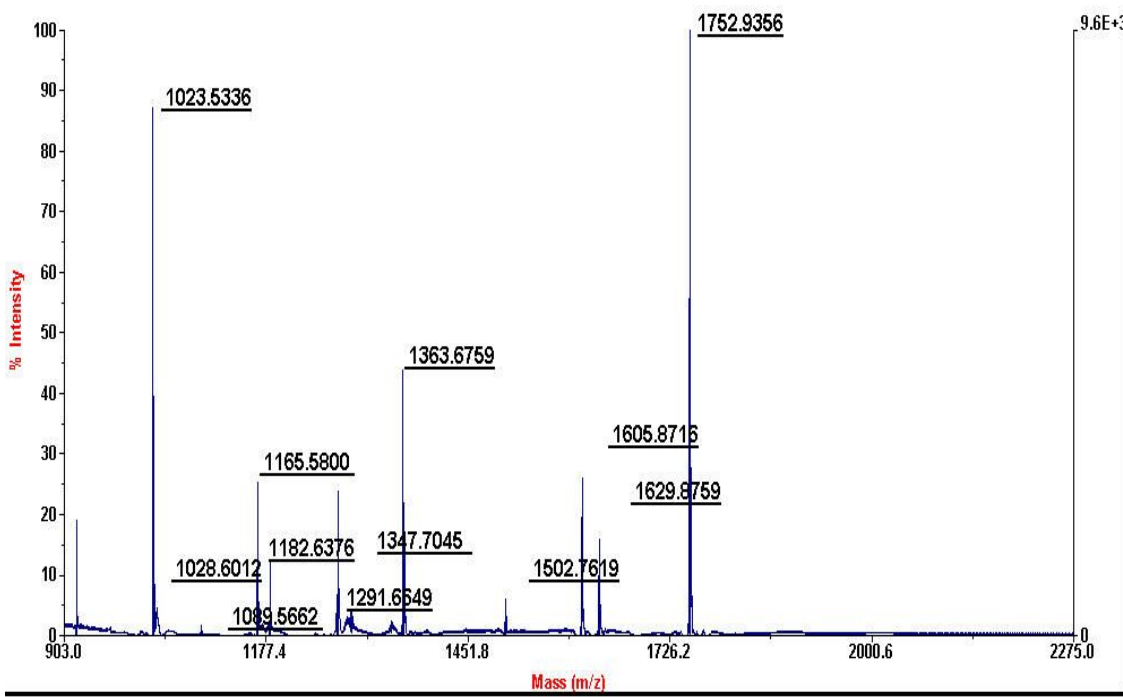

| Start - End | Observed  | Mr(expt)  | Mr(calc)  | Delta  | Miss Sequence                   |
|-------------|-----------|-----------|-----------|--------|---------------------------------|
| 29 - 41     | 1629.8759 | 1628.8686 | 1628.8005 | 0.0681 | 1 R.LQEKEDLQELNDR.L             |
| 42 - 48     | 849.5141  | 848.5068  | 848.4756  | 0.0312 | 0 R.LAVYIDR.V                   |
| 51 - 60     | 1089.5662 | 1088.5589 | 1088.5462 | 0.0128 | 0 R.SLETENAGLR.L                |
| 79 - 89     | 1165.5800 | 1164.5727 | 1164.5411 | 0.0316 | 0 K.AAYEAE LGDAR.K              |
| 157 - 166   | 1182.6376 | 1181.6303 | 1181.6040 | 0.0263 | 0 R.TLEGELHDLR.G                |
| 209 - 216   | 1023.5336 | 1022.5264 | 1022.5032 | 0.0231 | 0 K.NIYSEELR.E                  |
| 241 - 249   | 1028.6012 | 1027.5939 | 1027.5662 | 0.0277 | 0 R.LADALQELR.A                 |
| 250 - 261   | 1502.7619 | 1501.7547 | 1501.7161 | 0.0386 | 1 R.AQHEDQVEQYKK.E              |
| 281 - 296   | 1752.9356 | 1751.9283 | 1751.8550 | 0.0733 | 0 R.NSNLVGAAHEELQQR.I           |
| 367 - 377   | 1347.7045 | 1346.6972 | 1346.6652 | 0.0320 | 0 K.LALDMEIHAYR.K Oxidation (M) |
| 428 - 435   | 919.4619  | 918.4546  | 918.4308  | 0.0239 | 0 R.SSFSQHR.T                   |
| 440 - 453   | 1605.8716 | 1604.8644 | 1604.8046 | 0.0598 | 1 R.VAVEEVDEEGKFVR.L            |
| 472 - 482   | 1291.6649 | 1290.6577 | 1290.6204 | 0.0372 | 0 R.QNGDDPLLYR.F                |
| 516 - 527   | 1363.6759 | 1362.6686 | 1362.6099 | 0.0587 | 0 K.AQNTWGCNSLR.T               |

No match to: 1274.6472, 2899.4096

248 ) Aconitate hydratase, mitochondrial precursor

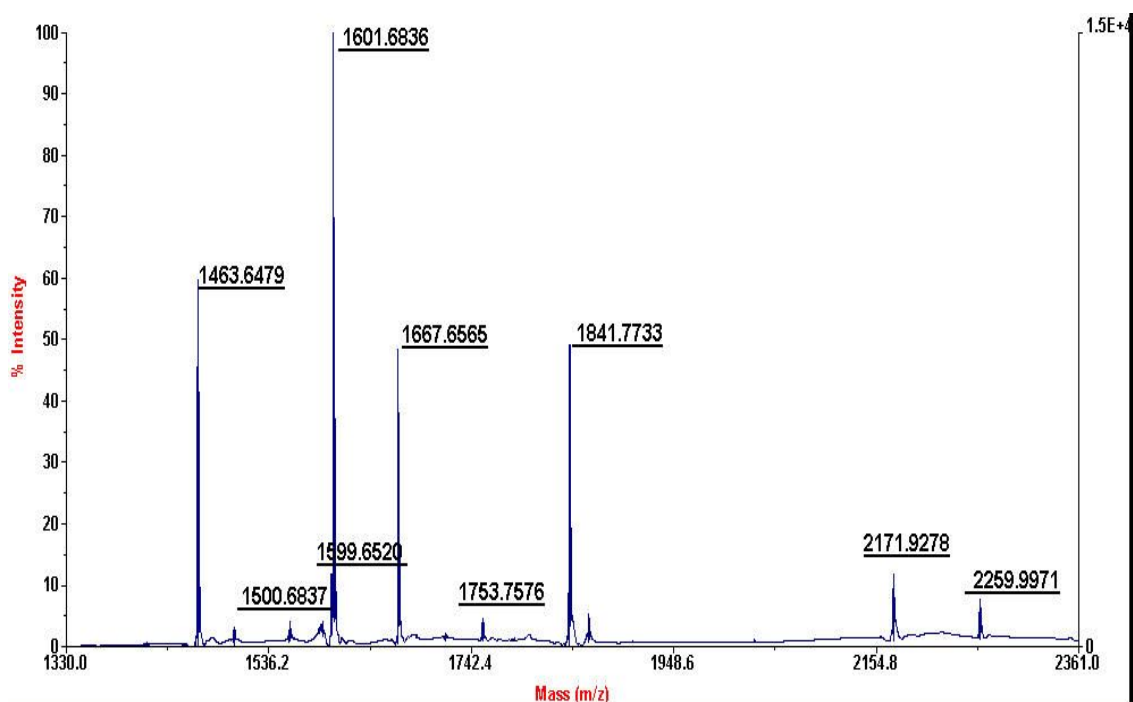

| Start - End   | Observed  | Mr(expt)  | Mr(calc)  | Delta   | Miss Sequence                  |
|---------------|-----------|-----------|-----------|---------|--------------------------------|
| 69 - 84       | 1841.7733 | 1840.7660 | 1840.8955 | -0.1295 | 0 K.IVYGHLDPPASQEIER.G         |
| 118 - 138     | 2259.9971 | 2258.9898 | 2259.1318 | -0.1420 | 0 K.VAVPSTIHCDHLIEAQVGGEK.D    |
| 145 - 160     | 1753.7576 | 1752.7503 | 1752.8682 | -0.1179 | 0 K.DINQEVYNFLATAGAK.Y         |
| 371 - 378     | 985.4378  | 984.4305  | 984.5029  | -0.0723 | 0 K.EGWPLDIR.V                 |
| 379 - 395     | 1861.6783 | 1860.6710 | 1860.7982 | -0.1272 | 0 R.VGLIGSCTNSSYEDMGR.S ;      |
| Oxidation (M) |           |           |           |         |                                |
| 412 - 424     | 1463.6479 | 1462.6406 | 1462.7416 | -0.1010 | 0 K.SQFTITPGSEQIR.A            |
| 430 - 437     | 935.4128  | 934.4055  | 934.4872  | -0.0817 | 0 R.DGYAQILR.D                 |
| 438 - 457     | 2171.9278 | 2170.9206 | 2171.0252 | -0.1046 | 0 R.DLGGIVLANACGPCIGQWDR.K 2   |
| 522 - 534     | 1500.6837 | 1499.6765 | 1499.7620 | -0.0855 | 1 K.FRLEAPDADELPK.G            |
| 550 - 564     | 1599.6520 | 1598.6447 | 1598.7285 | -0.0838 | 0 K.DSSGQHVDVSPTSQR.L          |
| 634 - 648     | 1601.6836 | 1600.6763 | 1600.7845 | -0.1083 | 0 R.NAVTQEFQVVPDPTAR.Y         |
| 657 - 671     | 1667.6565 | 1666.6492 | 1666.7587 | -0.1095 | 0 R.WVIGDENYEGESSR.E           |
| 744 - 767     | 2925.3256 | 2924.3183 | 2924.4205 | -0.1022 | 0 K.HPNGTQETILLNHTFNETQIEWFR.A |

249 ) Lamin-A/C

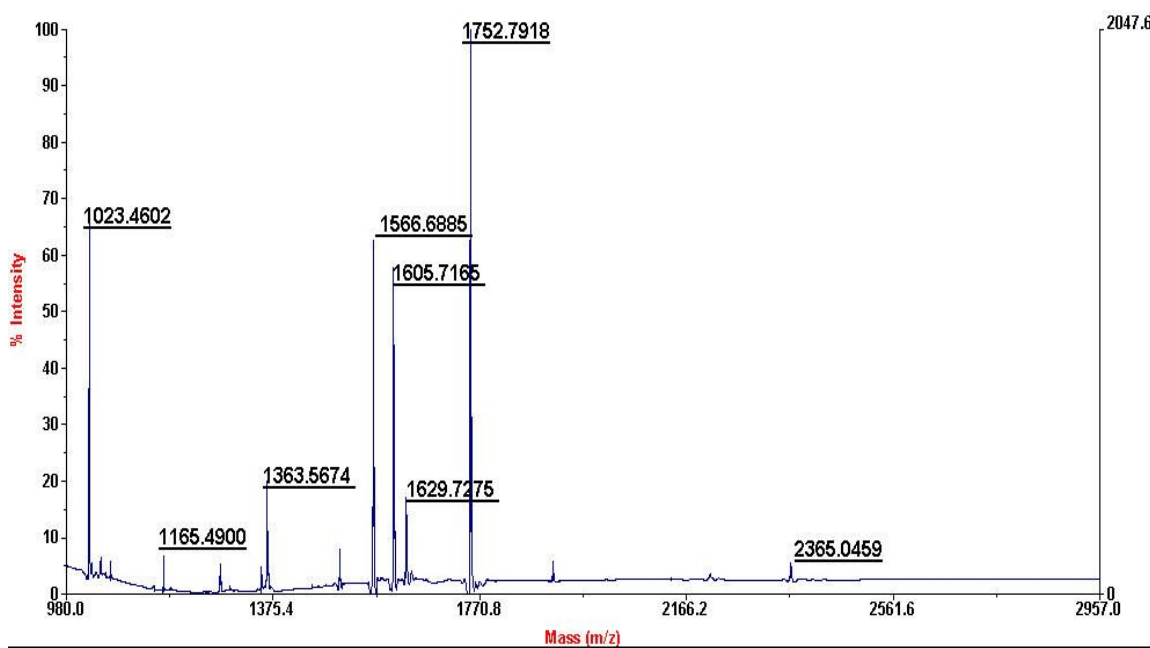

| Start - End                            | Observed  | Mr(expt)  | Mr(calc)  | Delta   | Miss Sequence           |
|----------------------------------------|-----------|-----------|-----------|---------|-------------------------|
| 29 - 41                                | 1629.7275 | 1628.7202 | 1628.8005 | -0.0803 | 1 R.LQEKEDLQELNDR.L     |
| 209 - 216                              | 1023.4602 | 1022.4530 | 1022.5032 | -0.0503 | 0 K.NIYSEELR.E          |
| 250 - 261                              | 1502.6661 | 1501.6588 | 1501.7161 | -0.0573 | 1 R.AQHEDQVEQYKK.E      |
| 281 - 296                              | 1752.7918 | 1751.7845 | 1751.8550 | -0.0705 | 0 R.NSNLVGAAHEELQQSR.I  |
| 428 - 435                              | 919.3606  | 918.3533  | 918.4308  | -0.0775 | 0 R.SSFSQHAR.T          |
| 440 - 453                              | 1605.7165 | 1604.7092 | 1604.8046 | -0.0954 | 1 R.VAVEEVDEEGKFVR.L    |
| 516 - 527                              | 1363.5674 | 1362.5601 | 1362.6099 | -0.0498 | 0 K.AQNTWGCNSLR.T       |
| 598 - 624                              | 2365.0459 | 2364.0386 | 2364.1517 | -0.1132 | 0                       |
| <b>K.ASASGSGAQVGGPISSGSSASSVTVTR.S</b> |           |           |           |         |                         |
| 628 - 644                              | 1566.6885 | 1565.6813 | 1565.7434 | -0.0622 | 0 R.SVGGSGGGSFGDNLVTR.S |
| 655 - 664                              | 1165.4900 | 1164.4827 | 1164.4903 | -0.0076 | 0 R.TQSPQNCSIM.-        |

No match to: 1064.5439, 1274.5279, 1352.6465

250 ) Iron-responsive element-binding protein 1

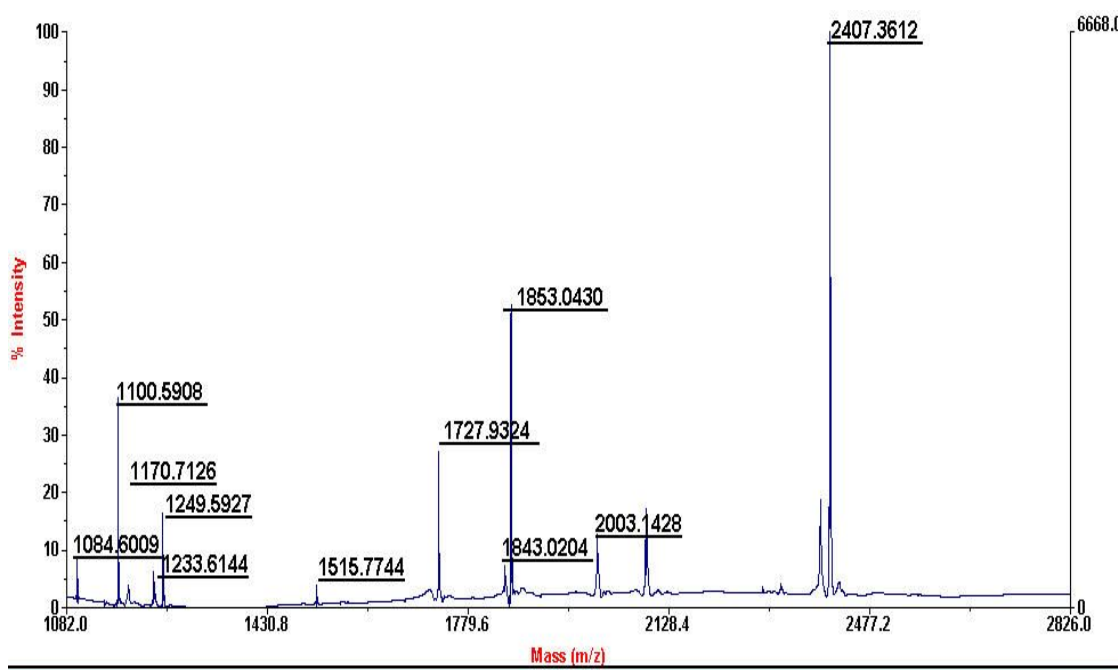

| Start - End | Observed  | Mr(expt)  | Mr(calc)  | Delta   | Miss Sequence                  |
|-------------|-----------|-----------|-----------|---------|--------------------------------|
| 57 - 72     | 2003.1428 | 2002.1356 | 2002.0384 | 0.0971  | 1 K.KQDIENILHWNVTQHK.N         |
| 73 - 82     | 1170.7126 | 1169.7053 | 1169.6557 | 0.0497  | 0 K.NIEVPFKPAR.V               |
| 142 - 149   | 1050.5396 | 1049.5323 | 1049.4778 | 0.0545  | 0 K.NQDLEFER.N                 |
| 159 - 168   | 1233.6144 | 1232.6071 | 1232.5509 | 0.0562  | 0 K.WGSQAFHNMR.I               |
| 159 - 168   | 1249.5927 | 1248.5854 | 1248.5458 | 0.0396  | 0 K.WGSQAFHNMR.I Oxidation (M) |
| 277 - 293   | 1853.0430 | 1852.0358 | 1851.9519 | 0.0838  | 0 K.FVEFFGPGVAQLSIADR.A        |
| 336 - 344   | 1084.6009 | 1083.5936 | 1083.5535 | 0.0401  | 0 K.YLQAVGMFR.D                |
| 336 - 344   | 1100.5908 | 1099.5835 | 1099.5484 | 0.0351  | 0 K.YLQAVGMFR.D Oxidation (M)  |
| 401 - 413   | 1515.7744 | 1514.7672 | 1514.7015 | 0.0657  | 0 K.GFQVAPHHNDHK.T             |
| 588 - 601   | 1727.9324 | 1726.9252 | 1726.8638 | 0.0613  | 1 K.DIWPTRDEIQAVR.Q            |
| 594 - 601   | 959.4579  | 958.4506  | 958.4720  | -0.0214 | 0 R.DEIQAVR.Q                  |
| 633 - 639   | 941.5063  | 940.4990  | 940.4807  | 0.0183  | 0 K.LFFWNSK.S                  |
| 645 - 660   | 1843.0204 | 1842.0132 | 1841.9563 | 0.0568  | 0 K.SPPFFENLTLDLQPPK.S         |
| 737 - 758   | 2407.3612 | 2406.3540 | 2406.2179 | 0.1360  | 0 K.QAPQTIHLPSGEILDVFDAER.Y    |
| 794 - 802   | 1037.5772 | 1036.5699 | 1036.5189 | 0.0510  | 0 K.AVLAESYER.I                |

No match to: 1189.1426, 2087.1645



251 ) Peptidyl-prolyl cis-trans isomerase B precursor

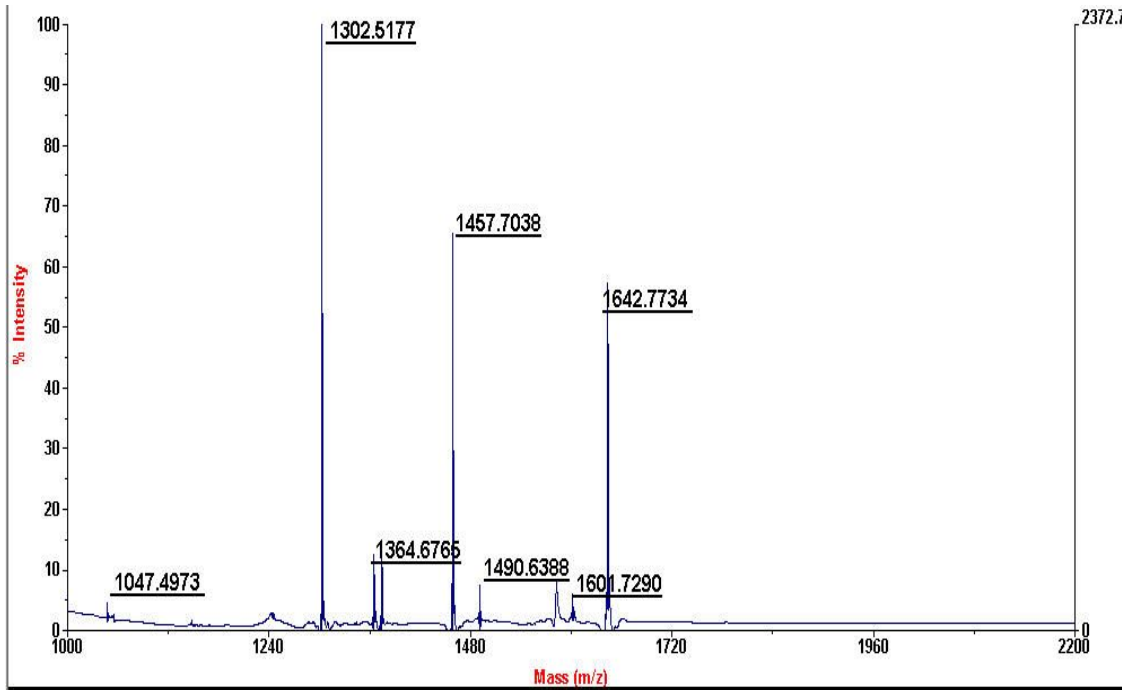

| Matched peptides shown in <b>Bold Red</b> | Start     | End       | Observed  | Mr(expt) | Mr(calc) | Delta              | Miss Sequence |
|-------------------------------------------|-----------|-----------|-----------|----------|----------|--------------------|---------------|
| 64 - 76                                   | 1364.6765 | 1363.6692 | 1363.6983 | -0.0291  | 0        | K.TVDNFVALATGEK.G  |               |
| 88 - 101                                  | 1642.7734 | 1641.7661 | 1641.8185 | -0.0524  | 1        | R.VIKDFMIQGGDFTR.G | Oxidation (M) |
| 91 - 101                                  | 1302.5177 | 1301.5104 | 1301.5711 | -0.0607  | 0        | K.DFMIQGGDFTR.G    | Oxidation (M) |
| 109 - 121                                 | 1601.7290 | 1600.7218 | 1600.7522 | -0.0304  | 1        | K.SIYGERFPDENFK.L  |               |
| 124 - 137                                 | 1490.6388 | 1489.6315 | 1489.6772 | -0.0457  | 0        | K.HYGPVWVSMANAGK.D | Oxidation (M) |
| 138 - 150                                 | 1457.7038 | 1456.6965 | 1456.7198 | -0.0233  | 0        | K.DTNGSQFFITTVK.T  |               |
| 164 - 172                                 | 1047.4973 | 1046.4900 | 1046.5430 | -0.0530  | 0        | K.VLEGMEVVR.K      | Oxidation (M) |
| 197 - 208                                 | 1373.7278 | 1372.7205 | 1372.7602 | -0.0397  | 1        | K.IEVEKPFIAIKE.-   |               |

252 ) Fructose-bisphosphate aldolase A

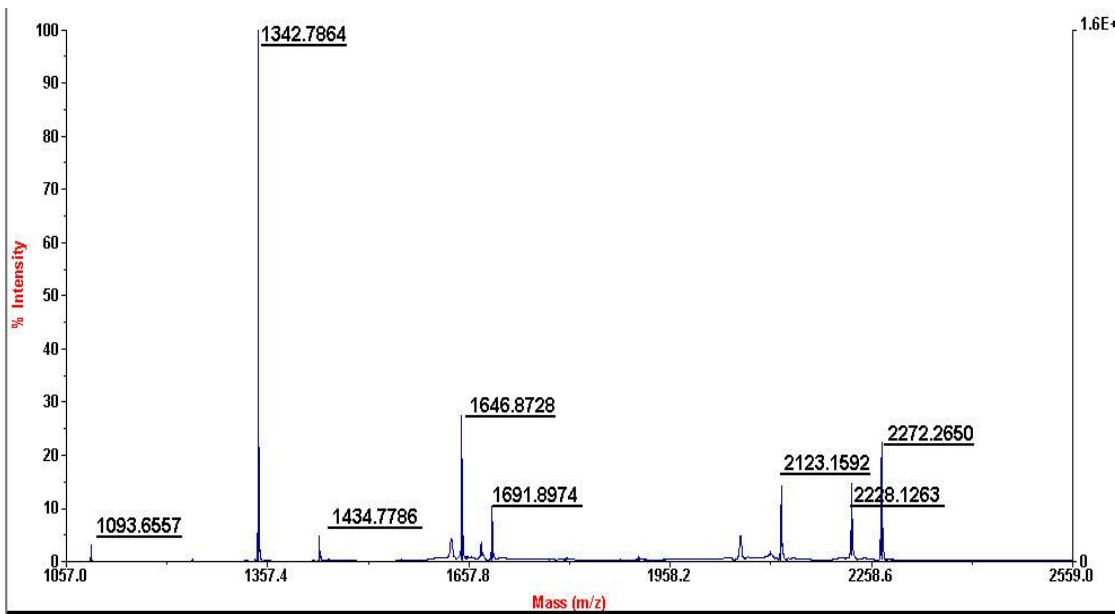

| Start - End   | Observed  | Mr(expt)  | Mr(calc)  | Delta  | Miss Sequence                   |
|---------------|-----------|-----------|-----------|--------|---------------------------------|
| 2 - 13        | 1434.7786 | 1433.7714 | 1433.7191 | 0.0523 | 0 M.PYQYPALTPEQK.K              |
| 44 - 57       | 1646.8728 | 1645.8655 | 1645.8019 | 0.0636 | 1 R.LQSIGTENTEENRR.F            |
| 88 - 99       | 1342.7864 | 1341.7791 | 1341.7041 | 0.0750 | 0 K.ADDGRFPQVIK.S               |
| 112 - 134     | 2272.2650 | 2271.2577 | 2271.1343 | 0.1234 | 0 K.GVVPLAGTNGETTTQGLDGLSER.C   |
| 154 - 173     | 2123.1592 | 2122.1519 | 2122.0840 | 0.0678 | 0 K.IGEHTPSALAIMENANVLAR.Y      |
| Oxidation (M) |           |           |           |        |                                 |
| 244 - 258     | 1691.8974 | 1690.8901 | 1690.8348 | 0.0553 | 0 K.FSHEEIAMATVTALR.R Oxidation |
| (M)           |           |           |           |        |                                 |
| 323 - 331     | 1093.6557 | 1092.6484 | 1092.5563 | 0.0921 | 1 K.AAQEEYVKR.A                 |
| 343 - 364     | 2228.1263 | 2227.1191 | 2227.0182 | 0.1009 | 0 K.YTPSGQAGAAASESLFVSNHAY.-    |

No match to: 2062.4837

253 ) Serotransferrin precursor

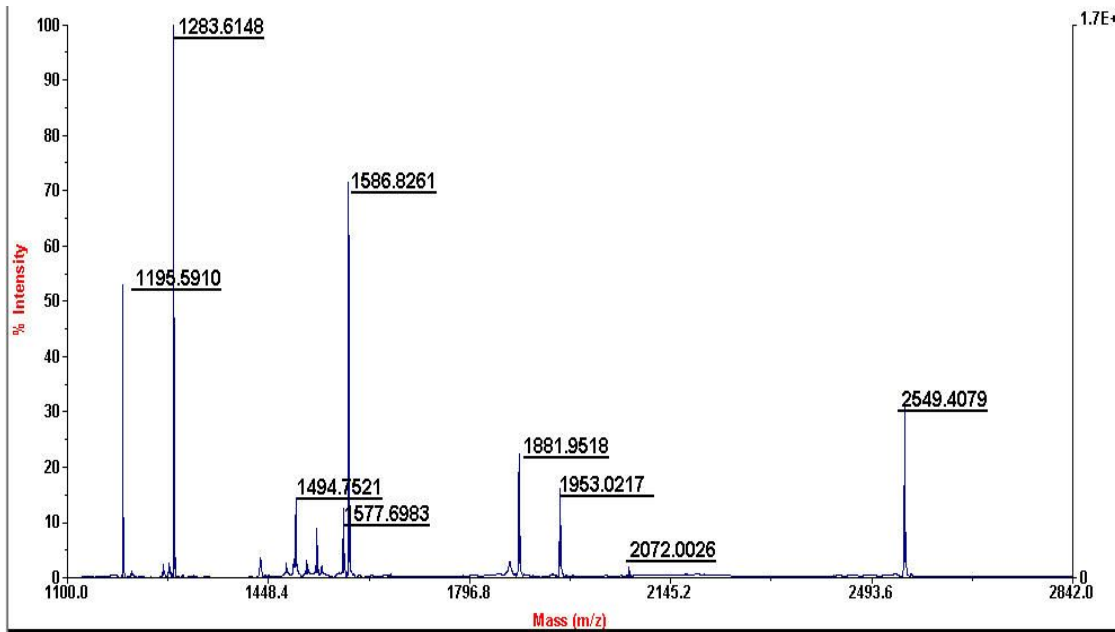

| Start - End | Observed  | Mr(expt)  | Mr(calc)  | Delta  | Miss Sequence                    |
|-------------|-----------|-----------|-----------|--------|----------------------------------|
| 123 - 132   | 1195.5910 | 1194.5838 | 1194.5452 | 0.0386 | 0 K.DSGFQMNQLR.G                 |
| 237 - 251   | 1881.9518 | 1880.9445 | 1880.8687 | 0.0759 | 1 K.ADRDQYELLCLDNTR.K            |
| 252 - 273   | 2549.4079 | 2548.4006 | 2548.2856 | 0.1150 | 1 R.KPVDEYKDCHLAQVPSHTVVAR.S     |
| 332 - 343   | 1494.7521 | 1493.7448 | 1493.7224 | 0.0224 | 0 K.MYLGYEYVTAIR.N Oxidation (M) |
| 434 - 452   | 2072.0026 | 2070.9953 | 2070.9204 | 0.0749 | 0 K.SDNCEDTPEAGYFAVAVVK.K        |
| 495 - 508   | 1577.6983 | 1576.6910 | 1576.6504 | 0.0406 | 0 R.FDEFFSEGCAPGSK.K             |
| 531 - 541   | 1283.6148 | 1282.6076 | 1282.5618 | 0.0457 | 0 K.EGYGYTGAFR.C                 |
| 572 - 587   | 1953.0217 | 1952.0145 | 1951.9309 | 0.0836 | 1 K.NLNEKDYELLCLDGTR.K           |
| 588 - 600   | 1586.8261 | 1585.8189 | 1585.7671 | 0.0518 | 0 R.KPVEEYANCHLAR.A              |
| 684 - 696   | 1531.7458 | 1530.7385 | 1530.6807 | 0.0579 | 0 K.CSTSSLLEACTFR.R 2            |

No match to: 1514.7110

254 ) Adenylate kinase isoenzyme 1

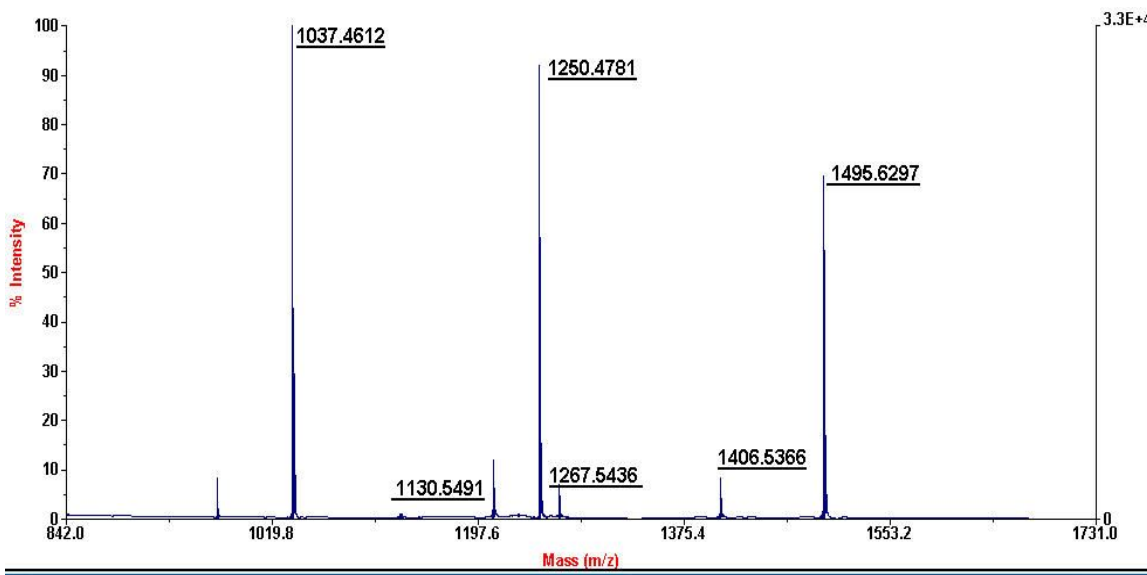

| Start - End | Observed  | Mr(expt)  | Mr(calc)  | Delta   | Miss Sequence       |
|-------------|-----------|-----------|-----------|---------|---------------------|
| 10 - 21     | 1130.5491 | 1129.5418 | 1129.6496 | -0.1077 | 0 K.IIFVVGGPGSGK.G  |
| 32 - 44     | 1495.6297 | 1494.6225 | 1494.7467 | -0.1242 | 0 K.YGYTHLSTGDLLR.S |
| 89 - 97     | 1037.4612 | 1036.4539 | 1036.5342 | -0.0803 | 0 K.GFLIDGYPR.E     |
| 98 - 107    | 1250.4781 | 1249.4708 | 1249.5575 | -0.0867 | 0 R.EVQQGEEFER.R    |
| 98 - 108    | 1406.5366 | 1405.5293 | 1405.6586 | -0.1293 | 1 R.EVQQGEEFERR.I   |
| 149 - 155   | 972.4559  | 971.4486  | 971.5076  | -0.0590 | 1 K.RLETYYK.A       |
| 156 - 166   | 1267.5436 | 1266.5363 | 1266.6496 | -0.1133 | 0 K.ATEPVIAFYEK.R   |

No match to: 1210.4547

255 ) Peptidyl-prolyl cis-trans isomerase A

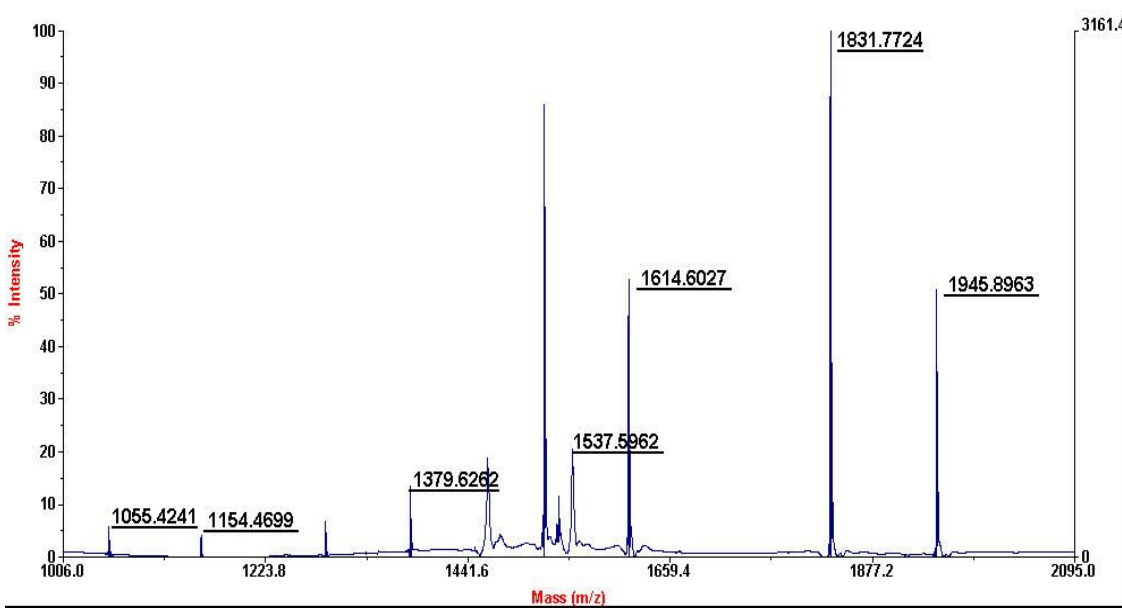

| Start - End | Observed | Mr(expt) | Mr(calc) | Delta | Miss Sequence |
|-------------|----------|----------|----------|-------|---------------|
|-------------|----------|----------|----------|-------|---------------|

|           |           |           |           |         |   |                                    |
|-----------|-----------|-----------|-----------|---------|---|------------------------------------|
| 2 - 19    | 1945.8963 | 1944.8890 | 1944.9946 | -0.1056 | 0 | M.VNPTVFFDIAVDGEPLGR.V             |
| 20 - 28   | 1055.4241 | 1054.4169 | 1054.5335 | -0.1166 | 0 | R.VSFELFADK.V                      |
| 20 - 31   | 1379.6262 | 1378.6189 | 1378.7496 | -0.1307 | 1 | R.VSFELFADKVPK.T                   |
| 56 - 69   | 1614.6027 | 1613.5954 | 1613.7331 | -0.1376 | 0 | R.IIPGFMCQGGDFTR.H ; Oxidation (M) |
| 77 - 91   | 1831.7724 | 1830.7651 | 1830.9039 | -0.1389 | 1 | K.SIYGEEKFEDENFILK.H               |
| 83 - 91   | 1154.4699 | 1153.4626 | 1153.5655 | -0.1029 | 0 | K.FEDENFILK.H                      |
| 132 - 144 | 1537.5962 | 1536.5889 | 1536.7276 | -0.1386 | 1 | K.VKEGMNIVEAMER.F 2 Oxidation      |

(M)

No match to: 1288.5646, 1462.9226, 1523.6125, 1553.7968

256 ) Phosphatidylethanolamine-binding protein 1

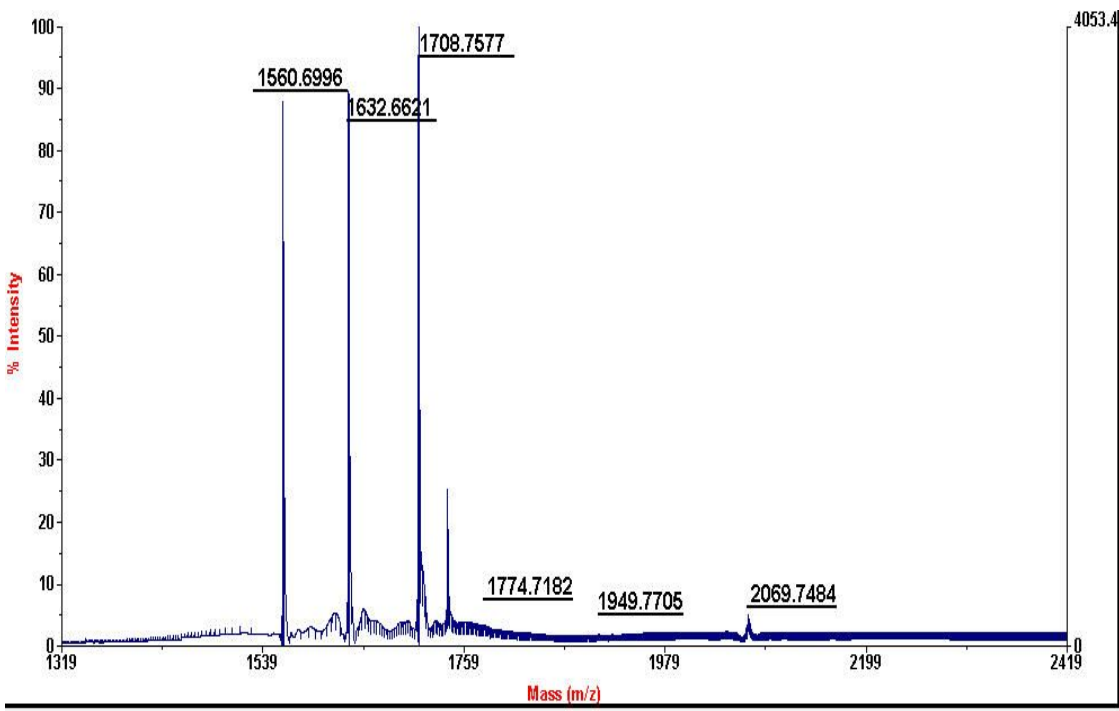

| Start - End | Observed  | Mr(expt)  | Mr(calc)  | Delta   | Miss Sequence                     |
|-------------|-----------|-----------|-----------|---------|-----------------------------------|
| 48 - 62     | 1632.6621 | 1631.6548 | 1631.7903 | -0.1355 | 0 K.NRPTSISWDGLDSGK.L             |
| 63 - 76     | 1560.6996 | 1559.6924 | 1559.8195 | -0.1272 | 0 K.LYTLVLTDPDAPSR.K              |
| 81 - 93     | 1774.7182 | 1773.7109 | 1773.8773 | -0.1664 | 1 K.YREWHHFLVVNMK.G Oxidation (M) |
| 94 - 113    | 1949.7705 | 1948.7632 | 1948.9378 | -0.1746 | 0 K.GNDISSGTVLSDYVGSPPK.G         |
| 120 - 132   | 1708.7577 | 1707.7504 | 1707.8984 | -0.1480 | 0 R.YVWLVEYQDRPLK.C               |
| 162 - 179   | 2069.7484 | 2068.7412 | 2068.9200 | -0.1789 | 0 R.APVAGTCYQAEWDDYVPK.L          |

No match to: 1648.6736, 1664.6380, 1740.7480

257 ) Phosphoglycerate kinase 1

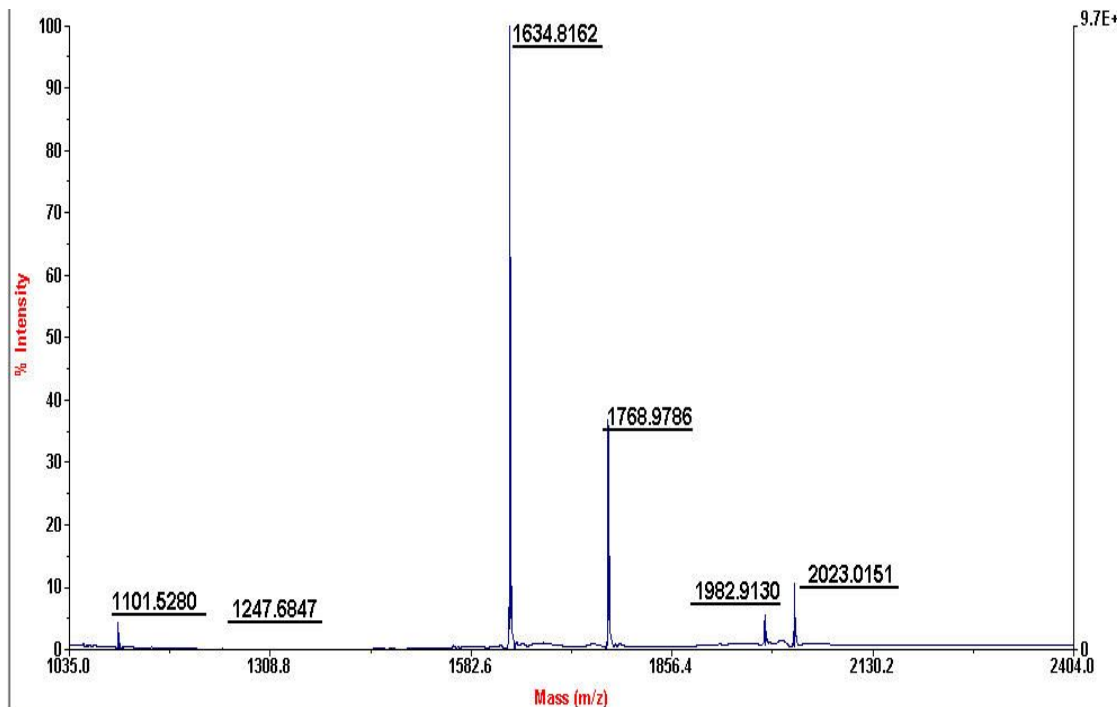

| Start - End | Observed  | Mr(expt)  | Mr(calc)  | Delta   | Miss Sequence            |
|-------------|-----------|-----------|-----------|---------|--------------------------|
| 31 - 39     | 1101.5280 | 1100.5207 | 1100.5323 | -0.0116 | 0 K.NNQITNNQR.I          |
| 76 - 86     | 1247.6847 | 1246.6774 | 1246.6809 | -0.0035 | 0 K.YSLEPVAVELK.S        |
| 157 - 171   | 1634.8162 | 1633.8089 | 1633.7849 | 0.0241  | 0 K.LGDVYVNDAFGTAHR.A    |
| 200 - 216   | 1768.9786 | 1767.9714 | 1767.9883 | -0.0169 | 0 K.ALESPERPFLAILGGAK.V  |
| 247 - 264   | 1982.9130 | 1981.9058 | 1981.9303 | -0.0245 | 0 K.VLNNMEIGTSLFDEEGAK.I |

Oxidation (M)

|           |           |           |           |         |                         |
|-----------|-----------|-----------|-----------|---------|-------------------------|
| 280 - 297 | 2023.0151 | 2022.0078 | 2022.0310 | -0.0231 | 1 K.ITLPVDFVTDKFDENAK.T |
|-----------|-----------|-----------|-----------|---------|-------------------------|

258 ) WD repeat protein 1

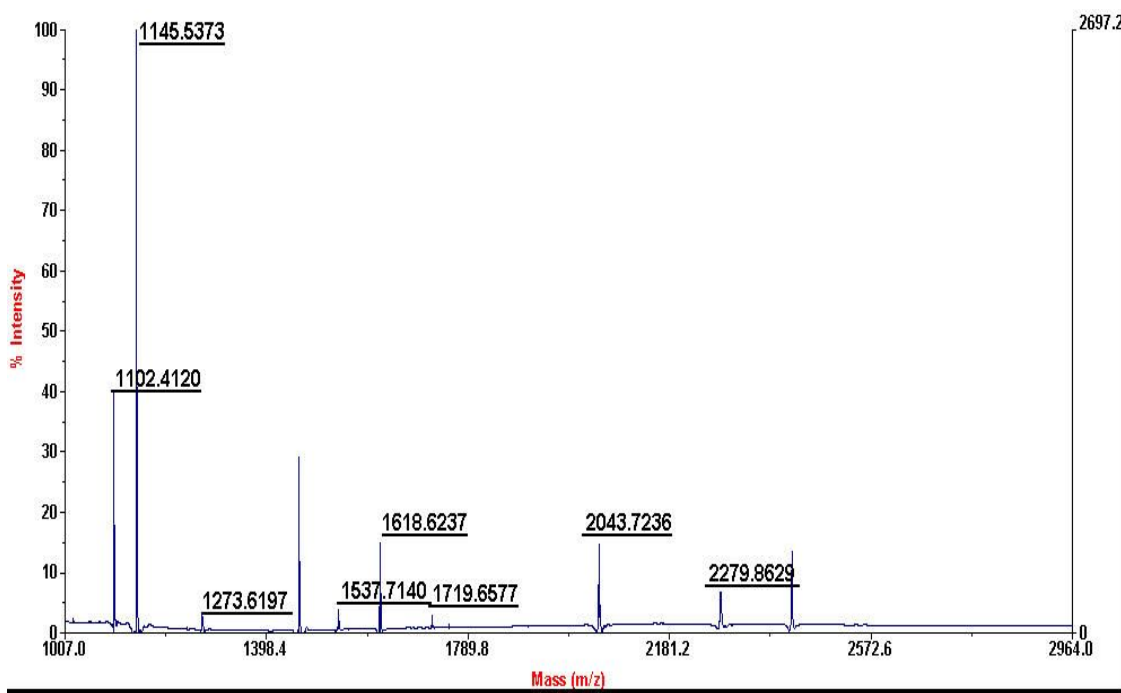

| Start - End | Observed  | Mr(expt)  | Mr(calc)  | Delta   | Miss Sequence                |
|-------------|-----------|-----------|-----------|---------|------------------------------|
| 7 - 17      | 1273.6197 | 1272.6124 | 1272.7190 | -0.1066 | 1 K.KVFASLPQVER.G            |
| 8 - 17      | 1145.5373 | 1144.5300 | 1144.6241 | -0.0940 | 0 K.VFASLPQVER.G             |
| 66 - 81     | 1618.6237 | 1617.6165 | 1617.7675 | -0.1510 | 0 K.YAPSGFYIASGDVSGK.L       |
| 84 - 90     | 891.3900  | 890.3827  | 890.4498  | -0.0671 | 0 R.IWDTTQK.E                |
| 96 - 104    | 1102.4120 | 1101.4048 | 1101.5131 | -0.1083 | 0 K.YEYQPFAGK.I              |
| 162 - 180   | 2043.7236 | 2042.7163 | 2042.9044 | -0.1881 | 0 R.LATGSDDNCAAFFEGPPFK.F    |
| 204 - 219   | 1719.6577 | 1718.6504 | 1718.8152 | -0.1647 | 0 R.FATASADGQIYIDGK.T        |
| 471 - 484   | 1537.7140 | 1536.7067 | 1536.8399 | -0.1332 | 1 R.LYSILGTTLKDEGK.L         |
| 490 - 511   | 2279.8629 | 2278.8557 | 2279.0529 | -0.1972 | 0 K.GPVTDVAYSHDGAFLAVCDASK.V |

No match to: 918.3681, 1023.4512, 1461.6547, 1752.7174, 2418.0330, 2584.9940, 3397.3271

259 ) Aconitate hydratase, mitochondrial precursor

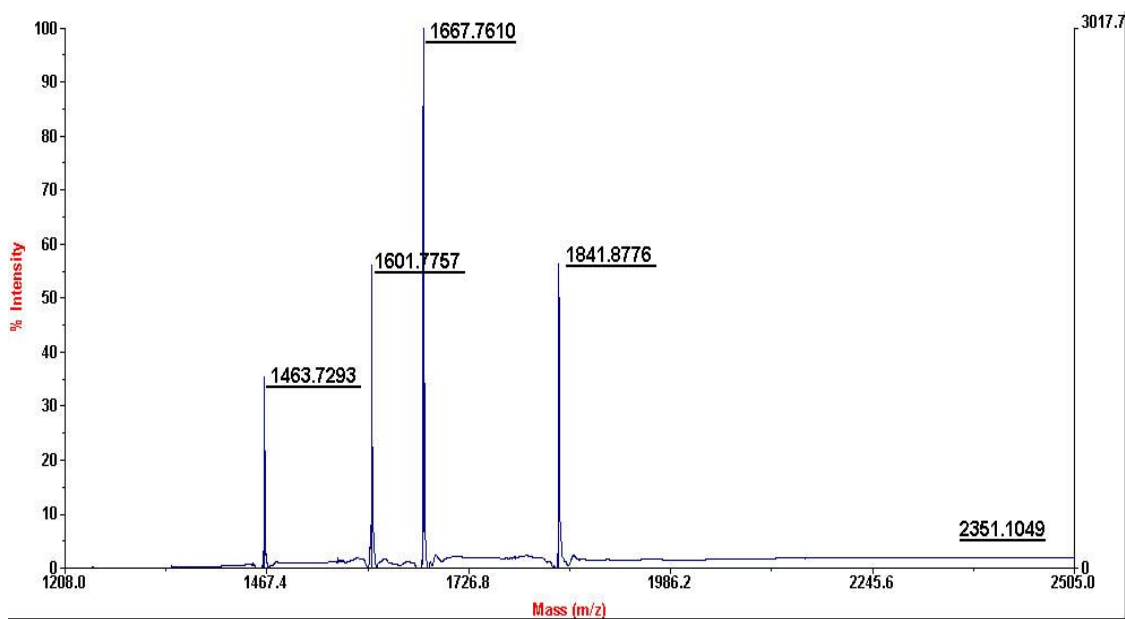

| Start - End | Observed  | Mr(expt)  | Mr(calc)  | Delta  | Miss Sequence |                                   |
|-------------|-----------|-----------|-----------|--------|---------------|-----------------------------------|
| 32 - 50     | 2351.1049 | 2350.0977 | 2350.0939 | 0.0037 | 0             | K.VAMSHFEPNEYIHYDLLEK.N Oxidation |

(M)

|           |           |           |           |         |   |                       |
|-----------|-----------|-----------|-----------|---------|---|-----------------------|
| 69 - 84   | 1841.8776 | 1840.8703 | 1840.8955 | -0.0252 | 0 | K.IVYGHLLDDPASQEIER.G |
| 371 - 378 | 985.4893  | 984.4820  | 984.5029  | -0.0209 | 0 | K.EGWPLDIR.V          |
| 412 - 424 | 1463.7293 | 1462.7220 | 1462.7416 | -0.0196 | 0 | K.SQFTITPGSEQIR.A     |
| 430 - 437 | 935.4417  | 934.4344  | 934.4872  | -0.0528 | 0 | R.DGYAQILR.D          |
| 634 - 648 | 1601.7757 | 1600.7684 | 1600.7845 | -0.0162 | 0 | R.NAVTQEFQVPDPTAR.Y   |
| 657 - 671 | 1667.7610 | 1666.7537 | 1666.7587 | -0.0050 | 0 | R.WVIGDENYGEQSSR.E    |

No match to: 3197.7325

260 ) Collagen alpha-1(VI) chain precursor



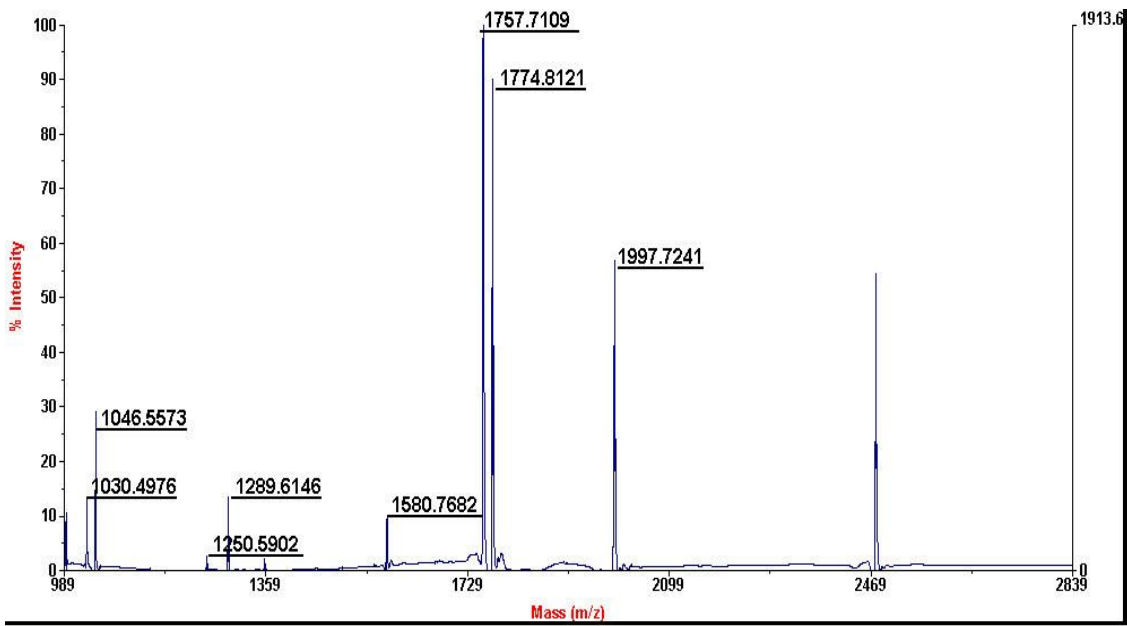

| Start - End | Observed  | Mr(expt)  | Mr(calc)  | Delta   | Miss Sequence            |
|-------------|-----------|-----------|-----------|---------|--------------------------|
| 186 - 199   | 1580.7682 | 1579.7610 | 1579.8358 | -0.0749 | 0 K.VFSVAITPDHLEPR.L     |
| 200 - 210   | 1289.6146 | 1288.6073 | 1288.6775 | -0.0702 | 0 R.LSIIATDHTYR.R        |
| 241 - 256   | 1997.7241 | 1996.7169 | 1996.8190 | -0.1021 | 0 K.NNVEQVCCSFECQPAR.G 3 |
| 712 - 722   | 1250.5902 | 1249.5829 | 1249.6415 | -0.0586 | 0 R.DQLLPPSPNNR.I        |
| 873 - 888   | 1774.8121 | 1773.8048 | 1773.9122 | -0.1074 | 0 R.VAVVQYSGTGQQRPER.A   |
| 977 - 984   | 992.4831  | 991.4758  | 991.5199  | -0.0441 | 0 R.QVNEPHIR.V           |
| 991 - 1005  | 1757.7109 | 1756.7036 | 1756.8056 | -0.1020 | 0 K.TAEYDVAYGESHLFR.V    |
| 1006 - 1014 | 1046.5573 | 1045.5500 | 1045.5920 | -0.0420 | 0 R.VPSYQALLR.G          |
| 1015 - 1023 | 1030.4976 | 1029.4903 | 1029.5356 | -0.0453 | 0 R.GVFNHQTVSR.K         |

No match to: 1356.5078, 2477.9811

261 ) Heterogeneous nuclear ribonucleoprotein L

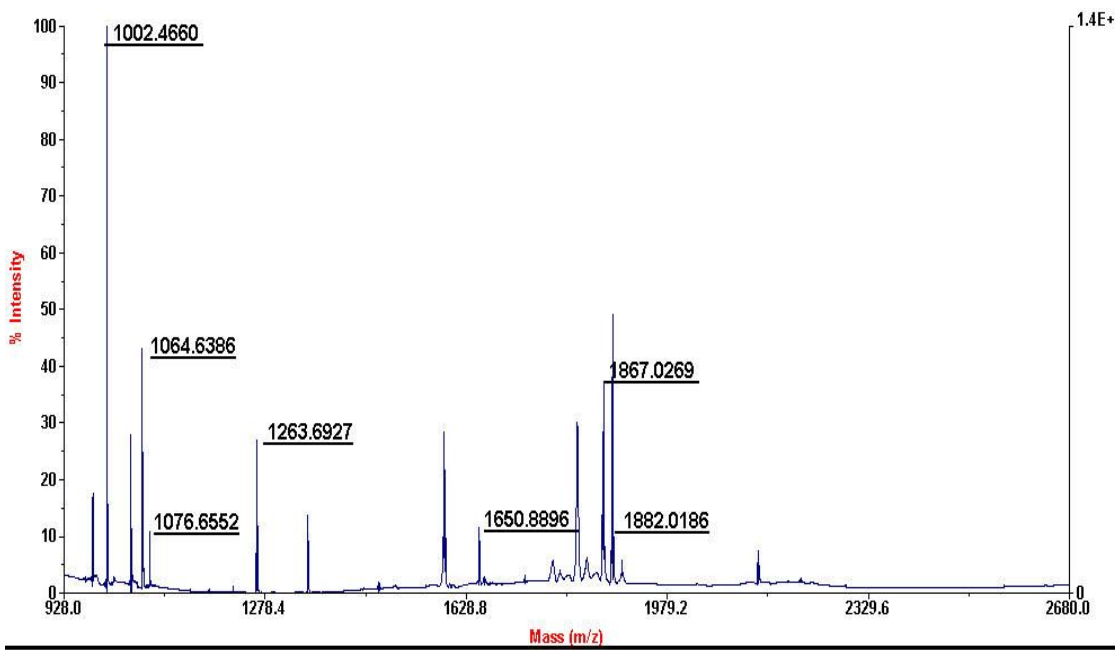

| Start - End | Observed  | Mr(expt)  | Mr(calc)  | Delta  | Miss Sequence           |
|-------------|-----------|-----------|-----------|--------|-------------------------|
| 16 - 25     | 1002.4660 | 1001.4587 | 1001.4203 | 0.0385 | 0 R.YYGGGSEGGR.A        |
| 67 - 76     | 1076.6552 | 1075.6479 | 1075.6138 | 0.0341 | 0 K.TPASPVVHIR.G        |
| 199 - 215   | 1882.0186 | 1881.0113 | 1880.8687 | 0.1426 | 0 K.NGVQAMVEFDSVQSAQR.A |

Oxidation (M)

|           |           |           |           |        |                                    |
|-----------|-----------|-----------|-----------|--------|------------------------------------|
| 234 - 241 | 977.5878  | 976.5806  | 976.5341  | 0.0464 | 0 K.IEYAKPTR.L                     |
| 404 - 417 | 1650.8896 | 1649.8823 | 1649.7984 | 0.0839 | 0 R.AITHLNNNFMFGQK.L Oxidation (M) |
| 522 - 537 | 1867.0269 | 1866.0196 | 1865.8982 | 0.1215 | 0 K.SDALETLGFLNHYQMK.N             |
| 538 - 548 | 1263.6927 | 1262.6854 | 1262.6295 | 0.0559 | 0 K.NPNGPYPYTLK.L                  |
| 549 - 558 | 1064.6386 | 1063.6313 | 1063.4757 | 0.1557 | 0 K.LCFSTAQHAS.-                   |

No match to: 1044.5780, 1352.8119, 1590.9767, 1820.1687, 2137.0359, 2890.5699

262) GTP:AMP phosphotransferase mitochondrial

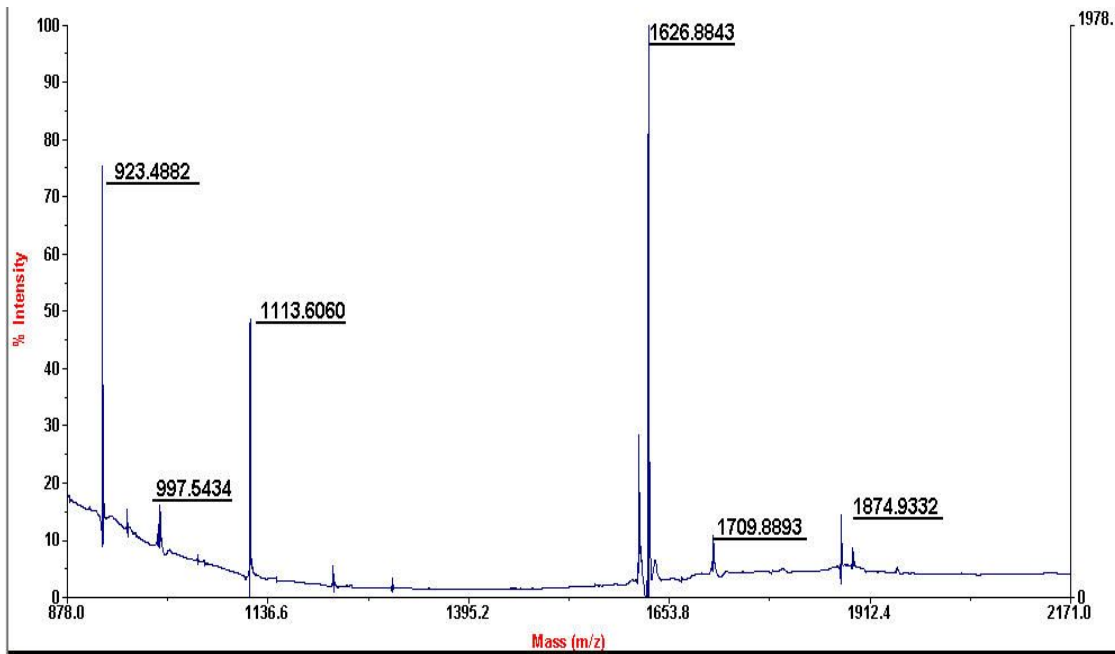

| Start - End | Observed  | Mr(expt)  | Mr(calc)  | Delta  | Miss Sequence         |
|-------------|-----------|-----------|-----------|--------|-----------------------|
| 35 - 43     | 997.5434  | 996.5361  | 996.5352  | 0.0009 | 0 K.HLSSGDLLR.D       |
| 81 - 94     | 1709.8893 | 1708.8820 | 1708.8573 | 0.0247 | 0 K.NLTQYSWLLDGFPR.T  |
| 95 - 104    | 1113.6060 | 1112.5987 | 1112.5826 | 0.0161 | 0 R.TLPQAEALDR.A      |
| 129 - 136   | 923.4882  | 922.4809  | 922.4773  | 0.0036 | 0 R.WIHPASGR.V        |
| 147 - 161   | 1626.8843 | 1625.8770 | 1625.8625 | 0.0145 | 0 K.TVGIDDLTGEPLIQR.E |
| 175 - 189   | 1874.9332 | 1873.9259 | 1873.9098 | 0.0162 | 0 K.AYEDQTKPVLEYYQK.K |

No match to: 1296.6691, 1614.9120, 1889.9315, 1946.0120

263) Peroxiredoxin-1

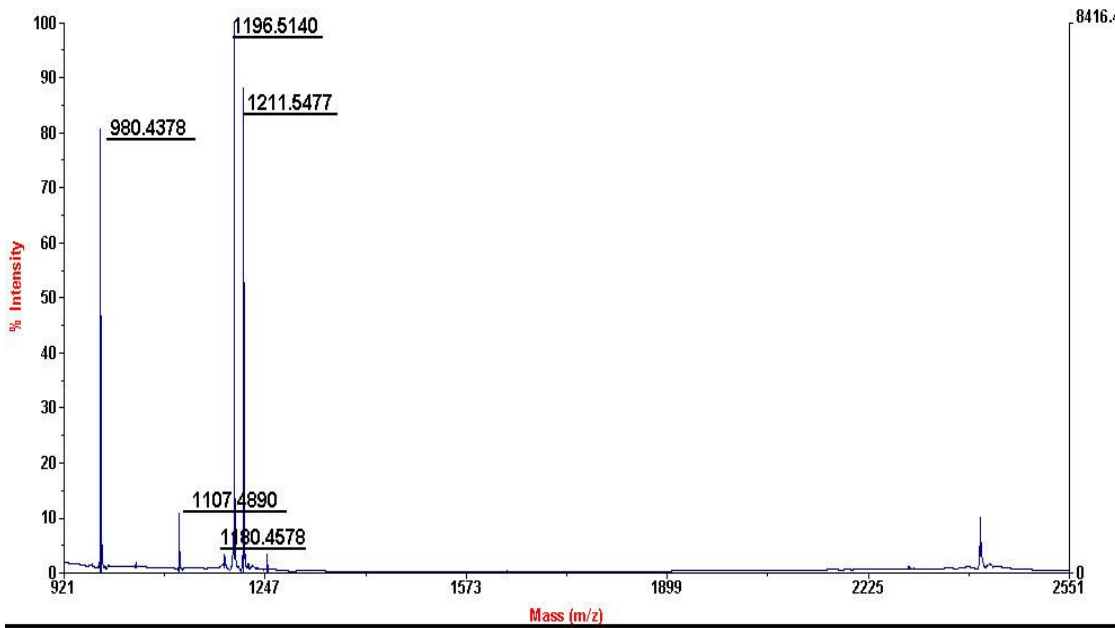

| Start - End | Observed  | Mr(expt)  | Mr(calc)  | Delta   | Miss Sequence                   |
|-------------|-----------|-----------|-----------|---------|---------------------------------|
| 8 - 16      | 980.4378  | 979.4305  | 979.5239  | -0.0934 | 0 K.IGHPAPNFK.A                 |
| 17 - 27     | 1180.4578 | 1179.4505 | 1179.5594 | -0.1089 | 0 K.ATAVMPDGQFK.D Oxidation (M) |
| 111 - 120   | 1107.4890 | 1106.4817 | 1106.5972 | -0.1155 | 0 R.TIAQDYGVLK.A                |
| 141 - 151   | 1211.5477 | 1210.5404 | 1210.6670 | -0.1266 | 0 R.QITVNDLPVGR.S               |
| 159 - 168   | 1196.5140 | 1195.5067 | 1195.6237 | -0.1170 | 0 R.LVQAFQFTDK.H                |

No match to: 1250.4710, 2405.9575

264) WD repeat protein 17 - Homo sapiens

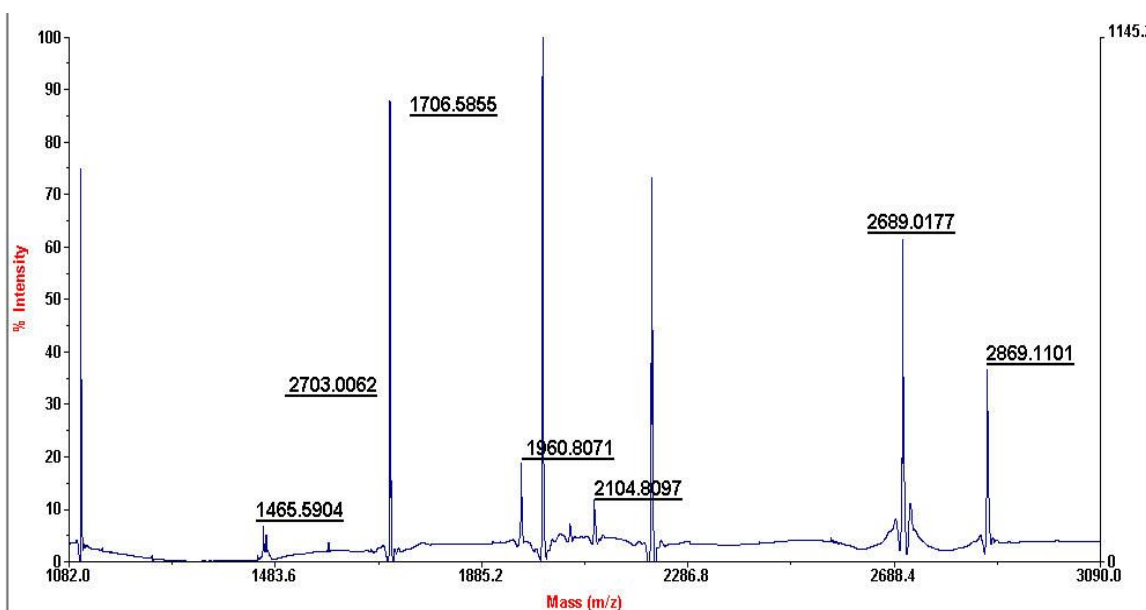

| Start - End | Observed | Mr(expt) | Mr(calc) | Delta | Miss Sequence |
|-------------|----------|----------|----------|-------|---------------|
|-------------|----------|----------|----------|-------|---------------|

|             |           |           |           |         |   |                               |
|-------------|-----------|-----------|-----------|---------|---|-------------------------------|
| 1 - 22      | 2869.1101 | 2868.1028 | 2868.2312 | -0.1284 | 0 | -.MAWMTYISNWFEQDDWYEGLQR.A    |
| 475 - 491   | 1960.8071 | 1959.7998 | 1959.9050 | -0.1052 | 0 | R.FNEHGTNGIFCIAWSHK.D         |
| 574 - 592   | 2104.8097 | 2103.8025 | 2104.0008 | -0.1983 | 1 | K.WSPLREGILCSGSDDGTVR.I       |
| 579 - 592   | 1465.5904 | 1464.5831 | 1464.6515 | -0.0684 | 0 | R.EGILCSGSDDGTVR.I            |
| 1014 - 1036 | 2703.0062 | 2701.9989 | 2702.2010 | -0.2021 | 1 | R.KCMMISVCFPCVGYSPFCYVNR.N    |
| 1015 - 1036 | 2689.0177 | 2688.0104 | 2688.1490 | -0.1386 | 0 | K.CMMISVCFPCVGYSPFCYVNR.N     |
| 1076 - 1090 | 1706.5855 | 1705.5782 | 1705.8015 | -0.2233 | 0 | K.LPTVEECMQLAETAR.A Oxidation |

(M)

No match to: 2215.8159, 2718.9014

265) 10 kDa heat shock protein, mitochondrial

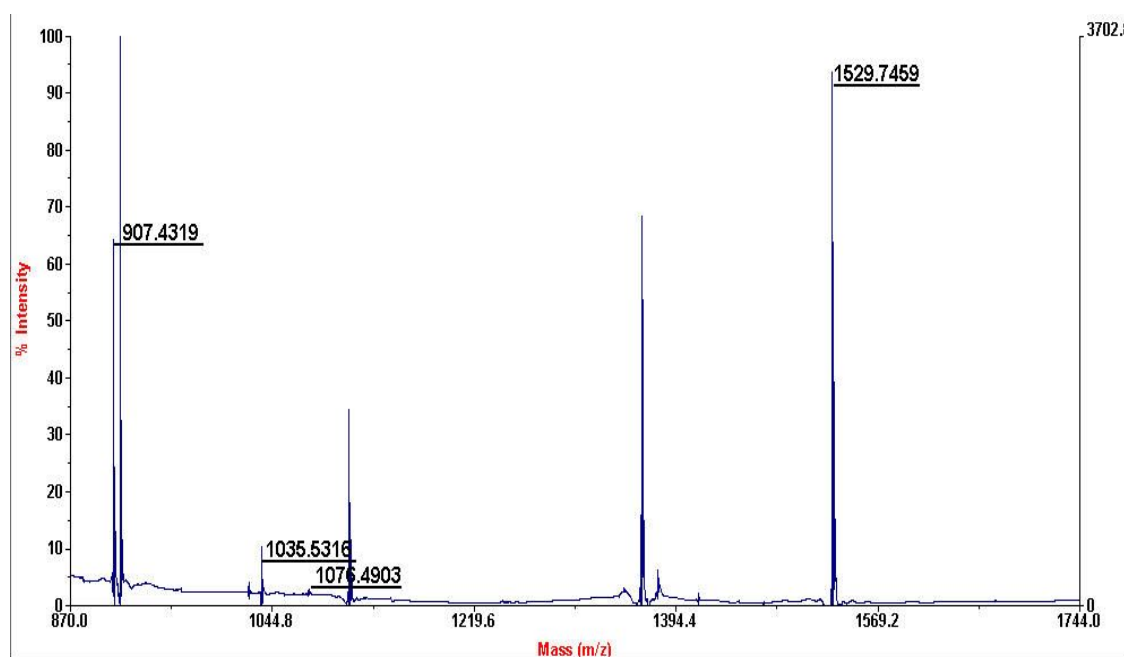

| Start - End | Observed  | Mr(expt)  | Mr(calc)  | Delta   | Miss Sequence      |
|-------------|-----------|-----------|-----------|---------|--------------------|
| 8 - 15      | 1035.5316 | 1034.5243 | 1034.5913 | -0.0670 | 1 R.KFLPLFDR.V     |
| 9 - 15      | 907.4319  | 906.4246  | 906.4963  | -0.0717 | 0 K.FLPLFDR.V      |
| 71 - 80     | 1076.4903 | 1075.4830 | 1075.5914 | -0.1083 | 0 K.VLLPEYGGTK.V   |
| 81 - 92     | 1529.7459 | 1528.7386 | 1528.7926 | -0.0540 | 1 K.VVLDDKDYFLFR.D |

No match to: 1111.4807, 1364.6360, 1378.6190, 1413.6386

266) Galectin-3

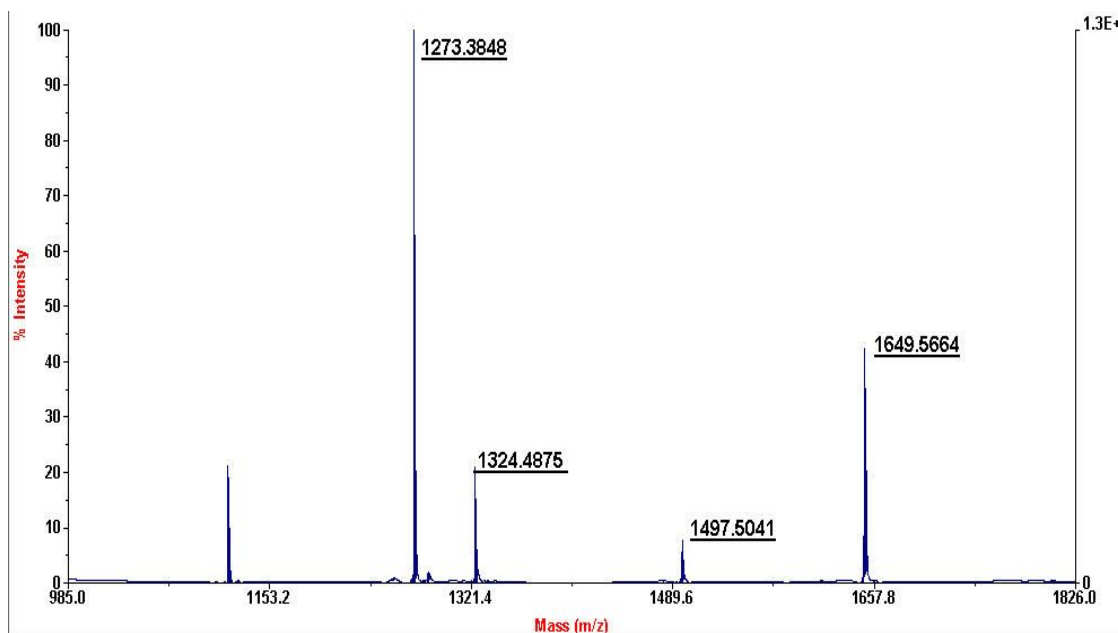

| Start - End | Observed  | Mr(expt)  | Mr(calc)  | Delta   | Miss | Sequence           |
|-------------|-----------|-----------|-----------|---------|------|--------------------|
| 152 - 162   | 1273.3848 | 1272.3775 | 1272.6000 | -0.2225 | 0    | R.GNDVAFHFNPR.F    |
| 187 - 199   | 1497.5041 | 1496.4969 | 1496.7664 | -0.2695 | 0    | R.QSVFPFESGKPKF.I  |
| 200 - 210   | 1324.4875 | 1323.4802 | 1323.7187 | -0.2385 | 0    | K.IQVLVEPDHFK.V    |
| 211 - 224   | 1649.5664 | 1648.5591 | 1648.8434 | -0.2842 | 0    | K.VAVNDAHLLQYNHR.V |

No match to: 1118.4811

267) Tudor domain-containing protein 7

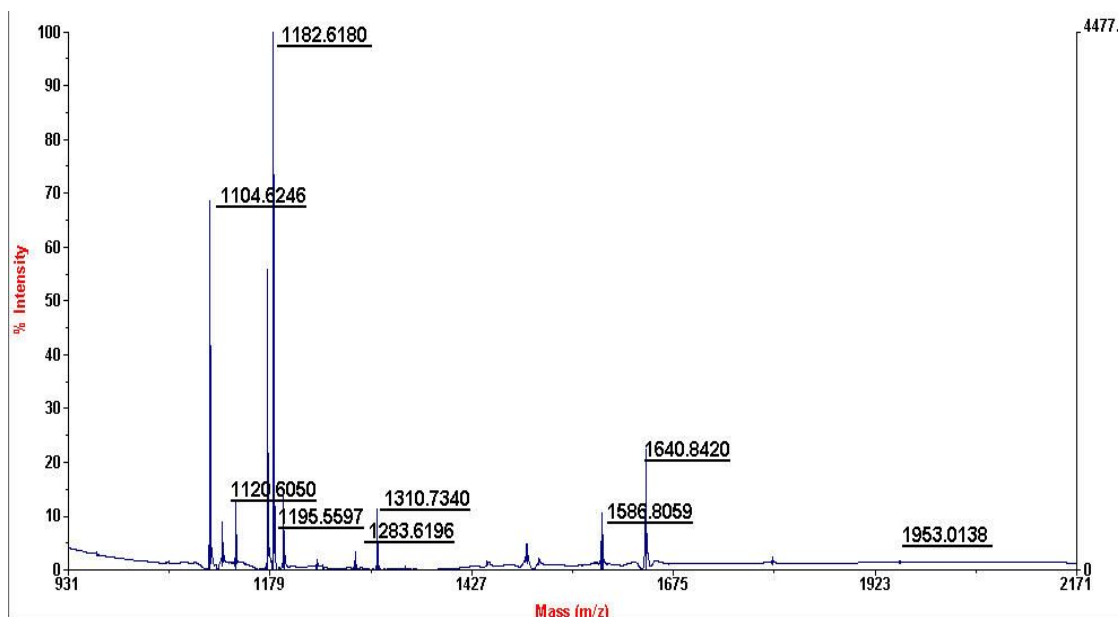

| Start - End | Observed  | Mr(expt)  | Mr(calc)  | Delta   | Miss Sequence                        |
|-------------|-----------|-----------|-----------|---------|--------------------------------------|
| 110 - 120   | 1310.7340 | 1309.7268 | 1309.6740 | 0.0527  | 0 K.TMPFFLEGKPK.A Oxidation (M)      |
| 189 - 205   | 1953.0138 | 1952.0065 | 1952.0302 | -0.0237 | 1 R.FSPKASLQPPLQMHLR.T Oxidation (M) |
| 563 - 576   | 1640.8420 | 1639.8347 | 1639.8392 | -0.0045 | 1 K.LNPKFCSLSFQATK.C                 |
| 685 - 693   | 1182.6180 | 1181.6107 | 1181.5539 | 0.0568  | 1 R.KIEDYFHCK.H                      |
| 747 - 756   | 1195.5597 | 1194.5524 | 1194.6720 | -0.1196 | 1 K.VSELREIPPR.F                     |
| 793 - 804   | 1283.6196 | 1282.6123 | 1282.5533 | 0.0590  | 0 R.DSVLNCSDCSIK.V                   |
| 1005 - 1013 | 1104.6246 | 1103.6173 | 1103.5798 | 0.0376  | 0 K.VQPLVDMFR.K                      |
| 1005 - 1013 | 1120.6050 | 1119.5978 | 1119.5747 | 0.0231  | 0 K.VQPLVDMFR.K Oxidation (M)        |
| 1029 - 1041 | 1586.8059 | 1585.7986 | 1585.6653 | 0.1333  | 0 K.CNQWSEEASMVFR.N                  |

No match to: 1136.6057, 1175.6177, 1235.5166, 1509.6975, 2549.4011

268) ATP synthase subunit alpha, mitochondrial precursor

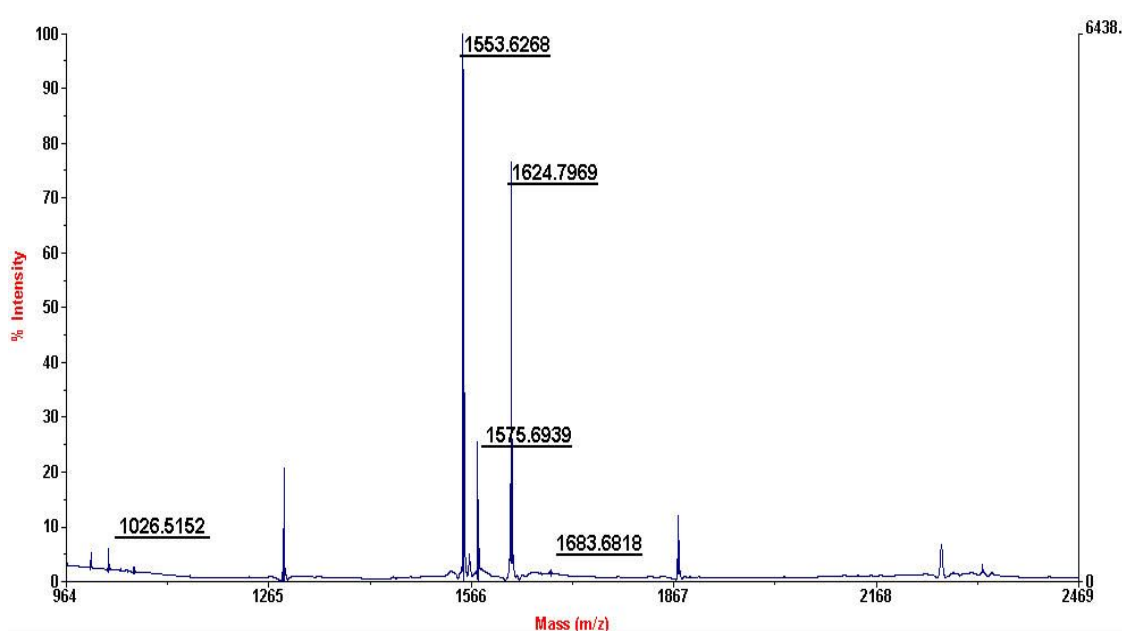

| Start - End | Observed  | Mr(expt)  | Mr(calc)  | Delta   | Miss Sequence                       |
|-------------|-----------|-----------|-----------|---------|-------------------------------------|
| 59 - 73     | 1575.6939 | 1574.6866 | 1574.7788 | -0.0922 | 0 R.ILGADTSVDLEETGR.V               |
| 89 - 103    | 1683.6818 | 1682.6745 | 1682.7821 | -0.1076 | 0 R.NVQAEEMVEFSSGLK.G Oxidation (M) |
| 134 - 149   | 1624.7969 | 1623.7896 | 1623.8832 | -0.0936 | 0 R.TGAIVDVPVGEELLGR.V              |

195 - 204 1026.5152 1025.5080 1025.5869 -0.0790 0 K.AVDSLVPPIGR.G  
 335 - 347 1553.6268 1552.6195 1552.7310 -0.1115 0 R.EAYPGDVFYLHSR.L

No match to: 1286.5830, 1677.6846, 1872.8488

269) Cofilin-1

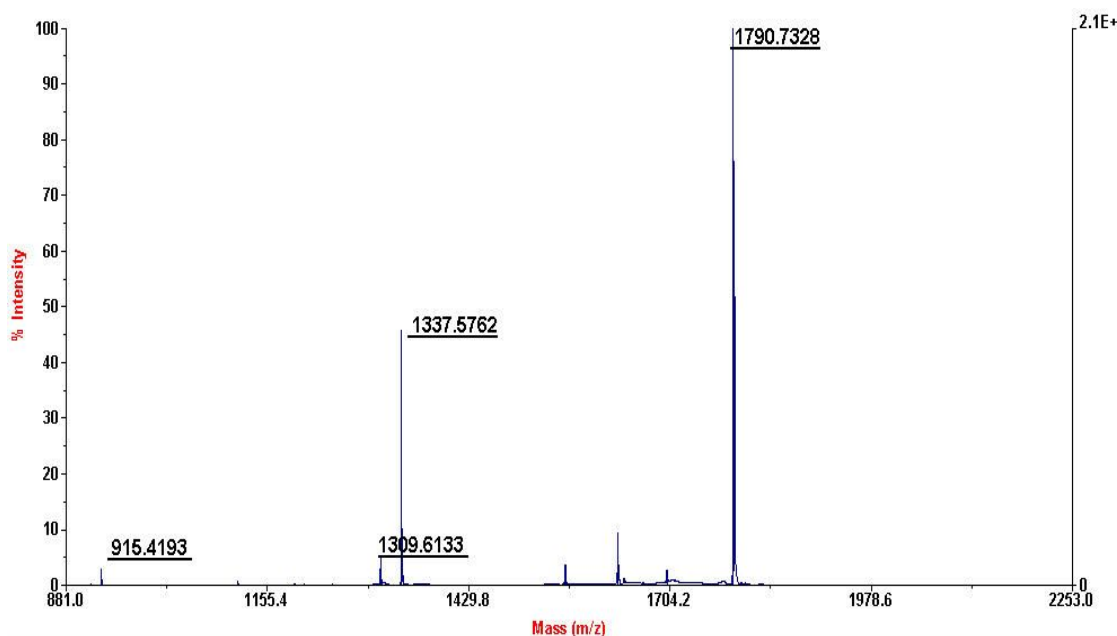

| Start - End | Observed  | Mr(expt)  | Mr(calc)  | Delta   | Miss Sequence        |
|-------------|-----------|-----------|-----------|---------|----------------------|
| 35 - 45     | 1309.6133 | 1308.6060 | 1308.6748 | -0.0687 | 1 K.AVLFCLSEDKK.N    |
| 46 - 53     | 915.4193  | 914.4120  | 914.5073  | -0.0953 | 0 K.NIILEEGK.E       |
| 82 - 92     | 1337.5762 | 1336.5690 | 1336.6187 | -0.0497 | 0 R.YALYDATYETK.E    |
| 133 - 146   | 1790.7328 | 1789.7256 | 1789.8053 | -0.0798 | 1 K.HELQANCYEEVKDR.C |

No match to: 1560.7615, 1699.7393

270 Collagen alpha-1(VI) chain precursor

| Start - End                  | Observed  | Mr(expt)  | Mr(calc)  | Delta  | Miss Sequence                 |
|------------------------------|-----------|-----------|-----------|--------|-------------------------------|
| 28 - 51                      | 2699.4666 | 2698.4593 | 2698.3313 | 0.1280 | 0                             |
| R.AVAFQDCPVDLFFVLDTSSEVALR.L |           |           |           |        |                               |
| 83 - 105                     | 2598.5156 | 2597.5083 | 2597.3238 | 0.1845 | 0 R.NLVWNAGALHYSDEVEIIQGLTR.M |
| 186 - 199                    | 1580.9418 | 1579.9345 | 1579.8358 | 0.0986 | 0 K.VFSVAITPDHLEPR.L          |
| 873 - 888                    | 1775.0736 | 1774.0663 | 1773.9122 | 0.1541 | 0 R.VAVVQYSGTGQQRPER.A        |
| 991 - 1005                   | 1757.9520 | 1756.9447 | 1756.8056 | 0.1391 | 0 K.TAEYDVAYGESHLFR.V         |



1006 - 1014 1046.6268 1045.6196 1045.5920 0.0275 0 R.VPSYQALLR.G

271 Probable lipid phosphate phosphatase PPAPDC3 (EC 3.1.3.-)

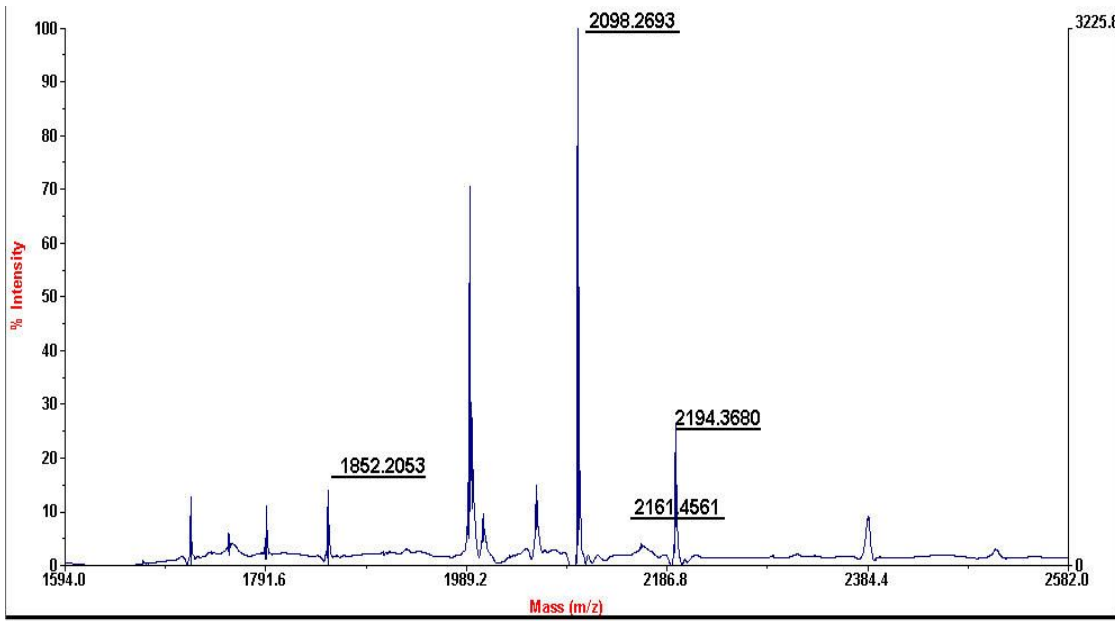

| Start - End | Observed  | Mr(expt)  | Mr(calc)  | Delta  | Miss Sequence               |
|-------------|-----------|-----------|-----------|--------|-----------------------------|
| 79 - 95     | 1852.2053 | 1851.1981 | 1850.9746 | 0.2234 | 1 K.GIAFNLLAIDICMSKR.L      |
| 115 - 135   | 2161.4561 | 2160.4488 | 2160.2493 | 0.1995 | 0 K.LIGITGHGIPWIGGTILCLVK.S |
| 216 - 234   | 2098.2693 | 2097.2620 | 2097.2319 | 0.0301 | 1 R.VLLVLWALCVGLSRVMIGR.H   |
| 253 - 271   | 2194.3680 | 2193.3607 | 2193.0672 | 0.2935 | 0 R.LVELVWMPSSCQMLISAW.-    |

No match to: 1717.1430, 1991.3859

272 Kinesin-like protein KIF14

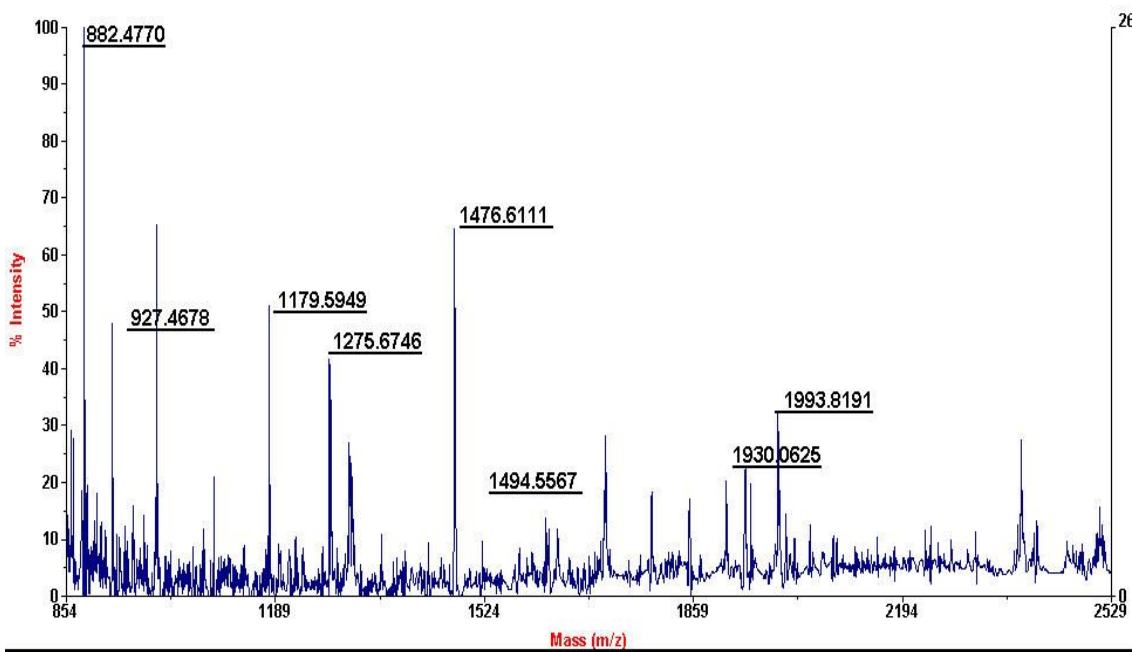

| Start - End | Observed  | Mr(expt)  | Mr(calc)  | Delta   | Miss Sequence                     |
|-------------|-----------|-----------|-----------|---------|-----------------------------------|
| 319 - 328   | 1179.5949 | 1178.5877 | 1178.6044 | -0.0167 | 1 K.SSFLANKQER.S                  |
| 354 - 370   | 1930.0625 | 1929.0552 | 1929.0796 | -0.0244 | 1 K.VENSQVTVAVRVPFTK.R            |
| 427 - 434   | 882.4770  | 881.4697  | 881.5334  | -0.0637 | 0 K.LAAPLLER.A                    |
| 570 - 582   | 1494.5567 | 1493.5495 | 1493.7548 | -0.2054 | 0 R.SHSVFTLVMTQTK.T Oxidation (M) |
| 743 - 752   | 1275.6746 | 1274.6673 | 1274.6765 | -0.0092 | 1 R.LCRQEITSLR.M                  |
| 950 - 962   | 1476.6111 | 1475.6038 | 1475.7476 | -0.1438 | 1 K.AKEEMMQGIQIAK.E               |
| 1458 - 1475 | 1993.8191 | 1992.8118 | 1993.0302 | -0.2184 | 1 K.TNAMGLIRSLLENIFAESK.I         |
| 1506 - 1512 | 927.4678  | 926.4605  | 926.5007  | -0.0402 | 1 K.LKHCLEK.A                     |

No match to: 998.4712

273

PH and SEC7 domain-containing protein 3

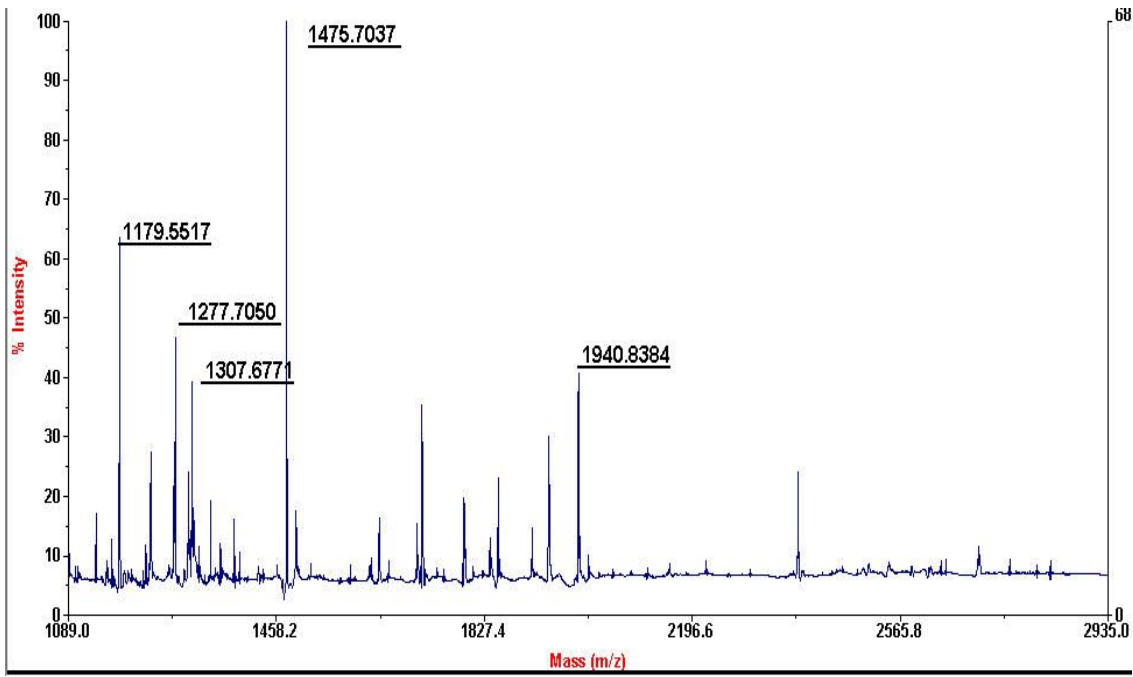

| Start - End | Observed  | Mr(expt)  | Mr(calc)  | Delta   | Miss Sequence            |
|-------------|-----------|-----------|-----------|---------|--------------------------|
| 208 - 218   | 1277.7050 | 1276.6977 | 1276.7390 | -0.0413 | 1 K.DLLKALYNSIK.N        |
| 330 - 347   | 1940.8384 | 1939.8311 | 1939.9752 | -0.1441 | 1 K.NAVSVHHALASKATDYEK.K |
| 480 - 493   | 1475.7037 | 1474.6964 | 1474.7151 | -0.0186 | 0 K.ELLSNDESEAAGLK.K     |
| 520 - 530   | 1307.6771 | 1306.6698 | 1306.6993 | -0.0295 | 1 R.KDHRPETPSIK.Q        |
| 521 - 530   | 1179.5517 | 1178.5444 | 1178.6044 | -0.0599 | 0 K.DHRPETPSIK.Q         |

No match to: 1716.8051, 1993.9218

274 Serotransferrin precursor (Transferrin) (Siderophilin) (Beta-1-metal-binding globulin)

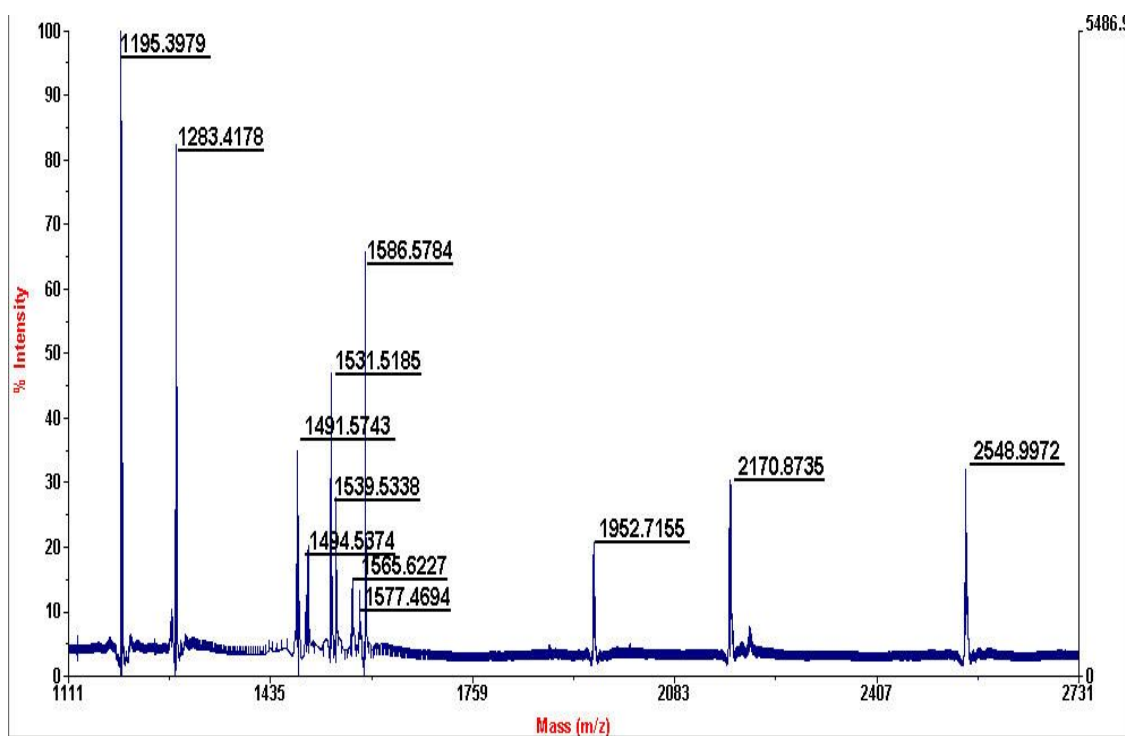

| Start - End | Observed  | Mr(expt)  | Mr(calc)  | Delta   | Miss Sequence                    |
|-------------|-----------|-----------|-----------|---------|----------------------------------|
| 144 - 162   | 2170.8735 | 2169.8663 | 2170.0881 | -0.2218 | 0 R.SAGWNIPIGLLYCDLPEPR.K        |
| 240 - 251   | 1539.5338 | 1538.5266 | 1538.7035 | -0.1769 | 0 R.DQYELLCLDNTR.K               |
| 252 - 273   | 2548.9972 | 2547.9899 | 2548.2856 | -0.2958 | 1 R.KPVDEYKDCHLAQVPSHTVVAR.S     |
| 298 - 310   | 1491.5743 | 1490.5670 | 1490.7518 | -0.1848 | 1 K.SKEFQLFSSPHGK.D              |
| 332 - 343   | 1478.5719 | 1477.5646 | 1477.7275 | -0.1629 | 0 K.MYLGYEYVTAIR.N               |
| 332 - 343   | 1494.5374 | 1493.5302 | 1493.7224 | -0.1923 | 0 K.MYLGYEYVTAIR.N Oxidation (M) |
| 363 - 371   | 1195.3979 | 1194.3906 | 1194.5352 | -0.1446 | 0 K.WCALSHHER.L                  |
| 495 - 508   | 1577.4694 | 1576.4621 | 1576.6504 | -0.1883 | 0 R.FDEFFSEGCAPGSK.K             |
| 531 - 541   | 1283.4178 | 1282.4105 | 1282.5618 | -0.1513 | 0 K.EGYGYTGAFR.C                 |
| 572 - 587   | 1952.7155 | 1951.7083 | 1951.9309 | -0.2227 | 1 K.NLNEKDYELLCLDGTR.K           |
| 588 - 600   | 1586.5784 | 1585.5712 | 1585.7671 | -0.1959 | 0 R.KPVEEYANCHLAR.A              |
| 647 - 659   | 1565.6227 | 1564.6154 | 1564.7919 | -0.1766 | 1 K.DLLFRDDTVCLAK.L              |
| 684 - 696   | 1531.5185 | 1530.5112 | 1530.6807 | -0.1695 | 0 K.CSTSSLLEACTFR.R 2            |

275 Lamin-A/C

| Start - End | Observed  | Mr(expt)  | Mr(calc)  | Delta   | Miss Sequence     |
|-------------|-----------|-----------|-----------|---------|-------------------|
| 134 - 144   | 1243.6969 | 1242.6896 | 1242.7183 | -0.0287 | 1 R.LKDLEALLNSK.E |

|           |           |           |           |         |   |                          |
|-----------|-----------|-----------|-----------|---------|---|--------------------------|
| 157 - 171 | 1665.9763 | 1664.9690 | 1664.8846 | 0.0844  | 1 | R.TLEGELHDLRGQVAK.L      |
| 241 - 260 | 2384.0632 | 2383.0559 | 2383.1768 | -0.1208 | 1 | R.LADALQELRAQHEDQVEQYK.K |
| 281 - 296 | 1752.9778 | 1751.9705 | 1751.8550 | 0.1155  | 0 | R.NSNLVGAAHEELQQSR.I     |
| 428 - 435 | 919.4975  | 918.4902  | 918.4308  | 0.0594  | 0 | R.SSFSQHAR.T             |
| 440 - 453 | 1605.9434 | 1604.9361 | 1604.8046 | 0.1315  | 1 | R.VAVEEVDEEGKFVR.L       |
| 516 - 527 | 1363.7224 | 1362.7152 | 1362.6099 | 0.1053  | 0 | K.AQNTWGCNSLR.T          |

No match to: 1064.6515, 1307.7382, 1461.7441, 1565.8321, 1590.9968, 1638.9194, 2501.3924

#### 276 WD repeat protein 1

| Start - End                           | Observed  | Mr(expt)  | Mr(calc)  | Delta  | Miss | Sequence                    |
|---------------------------------------|-----------|-----------|-----------|--------|------|-----------------------------|
| 8 - 17                                | 1145.7110 | 1144.7037 | 1144.6241 | 0.0796 | 0    | K.VFASLPQVER.G              |
| 44 - 65                               | 2418.4317 | 2417.4244 | 2417.2339 | 0.1905 | 0    | R.NIDNPALADIYTEHAHQVVVAK.Y  |
| 96 - 104                              | 1102.6057 | 1101.5984 | 1101.5131 | 0.0853 | 0    | K.YEYQPFAGK.I               |
| 156 - 161                             | 806.4965  | 805.4892  | 805.4195  | 0.0698 | 0    | K.QSRPYR.L                  |
| 162 - 180                             | 2044.0503 | 2043.0430 | 2042.9044 | 0.1386 | 0    | R.LATGSDDNCAAFFEGPPFK.F     |
| 197 - 219                             | 2493.3508 | 2492.3435 | 2492.1608 | 0.1827 | 1    | R.FSPDGNRFATASADGQIYIYDGK.T |
| 232 - 256                             | 2585.4754 | 2584.4681 | 2584.2194 | 0.2487 | 0    |                             |
| K.AHDGGIYAIWSPDSTHLLSASGDK.T          |           |           |           |        |      |                             |
| 438 - 470                             | 3397.8940 | 3396.8868 | 3396.6045 | 0.2822 | 0    |                             |
| K.CFSIDNPGYEPEVVAVHPGGDTVAIGGVDGNVR.L |           |           |           |        |      |                             |
| 490 - 511                             | 2280.2182 | 2279.2109 | 2279.0529 | 0.1581 | 0    | K.GPVTDVAYSHDGAFLAVCDASK.V  |
| 512 - 534                             | 2540.4276 | 2539.4204 | 2539.2132 | 0.2072 | 0    | K.VVTVFSVADGYSENNVFGHHAK.I  |

No match to: 882.6521, 918.5258, 1461.8791, 1605.9309, 1752.9806, 3382.8614, 3526.9284, 3822.5162

#### 277 Cullin-associated NEDD8-dissociated protein 2

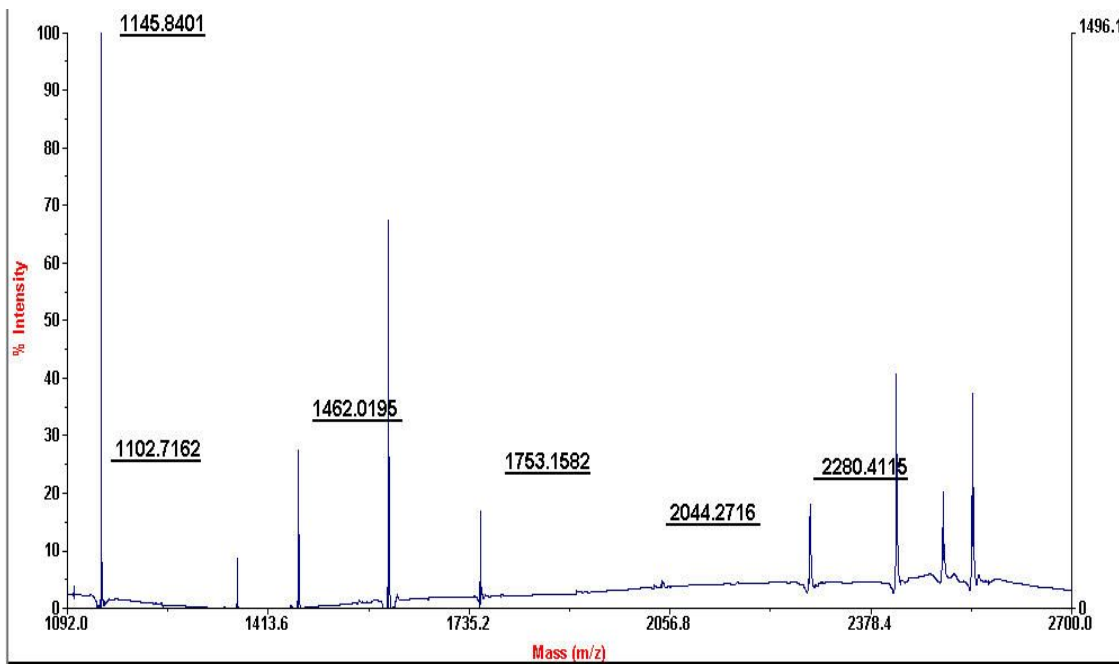

| Start - End                                           | Observed  | Mr(expt)  | Mr(calc)  | Delta  | Miss Sequence                 |
|-------------------------------------------------------|-----------|-----------|-----------|--------|-------------------------------|
| 15 - 23                                               | 1102.7162 | 1101.7089 | 1101.4761 | 0.2328 | 1 K.MTSSDKDFR.F Oxidation (M) |
| 129 - 142                                             | 1462.0195 | 1461.0122 | 1460.8463 | 0.1659 | 1 R.LPGPRVPTSPTAIR.T          |
| 143 - 158                                             | 1753.1582 | 1752.1509 | 1751.9213 | 0.2296 | 1 R.TLIQCLGSVGRQAGHR.L        |
| 319 - 346                                             | 3136.8494 | 3135.8421 | 3135.5845 | 0.2576 | 1                             |
| <b>K.GWLEAMEEPTQTGSNLHMLRGQVPLVVK.A Oxidation (M)</b> |           |           |           |        |                               |
| 458 - 466                                             | 1145.8401 | 1144.8328 | 1144.6618 | 0.1710 | 0 R.ALWPLHRPR.M               |
| 467 - 486                                             | 2280.4115 | 2279.4042 | 2279.1290 | 0.2752 | 1 R.MLDPEPYVGEMSAVTLARLR.A 2  |
| <b>Oxidation (M)</b>                                  |           |           |           |        |                               |
| 953 - 970                                             | 2044.2716 | 2043.2643 | 2042.9732 | 0.2912 | 1 R.EVEMGPFKHTVDDGLDVR.K      |

No match to: 1363.8679, 1538.0787, 1606.0870

278 Fructose-bisphosphate aldolase C

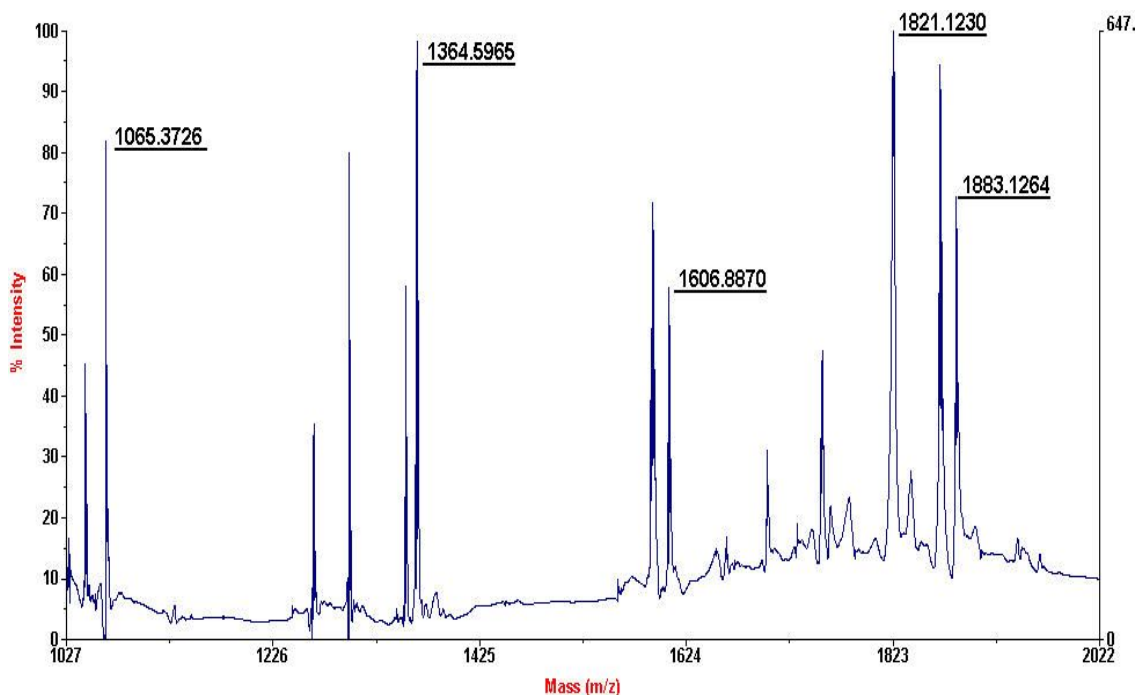

| Start - End | Observed  | Mr(expt)  | Mr(calc)  | Delta   | Miss Sequence                     |
|-------------|-----------|-----------|-----------|---------|-----------------------------------|
| 29 - 42     | 1364.5965 | 1363.5892 | 1363.6653 | -0.0761 | 0 K.GILADESVGSMAK.R Oxidation (M) |
| 72 - 87     | 1883.1264 | 1882.1191 | 1881.9811 | 0.1380  | 1 K.KCIGGVVIFHETLYQK.D            |
| 141 - 149   | 1065.3726 | 1064.3653 | 1064.5039 | -0.1387 | 1 K.DGADFAKWR.C                   |
| 290 - 304   | 1821.1230 | 1820.1157 | 1819.9192 | 0.1965  | 0 R.CPLPRPWALTFSYGR.A             |
| 316 - 330   | 1606.8870 | 1605.8797 | 1605.7747 | 0.1051  | 1 R.GQRDNAGAATEEFIK.R             |

No match to: 1299.5356, 1353.6505, 1363.6288, 1867.1179

| 279 Start - End | Observed  | Mr(expt)  | Mr(calc)  | Delta   | Miss Sequence                  |
|-----------------|-----------|-----------|-----------|---------|--------------------------------|
| 104 - 113       | 1385.6317 | 1384.6244 | 1384.5798 | 0.0446  | 0 R.YFFDEWMFGK.V Oxidation (M) |
| 142 - 159       | 2036.2051 | 2035.1978 | 2035.0343 | 0.1635  | 1 R.YRAIVNPMDMQTSGALLR.T       |
| 144 - 159       | 1716.9760 | 1715.9687 | 1715.8698 | 0.0989  | 0 R.AIVNPMDMQTSGALLR.T         |
| 144 - 163       | 2164.3803 | 2163.3730 | 2163.0850 | 0.2880  | 1 R.AIVNPMDMQTSGALLRTCVK.A     |
| Oxidation (M)   |           |           |           |         |                                |
| 334 - 343       | 1164.4553 | 1163.4481 | 1163.4964 | -0.0484 | 0 R.HFNSQLCCGR.K               |

No match to: 1040.1290, 1476.7675, 2540.9390

280 Psoriasis susceptibility 1 candidate gene 1 protein

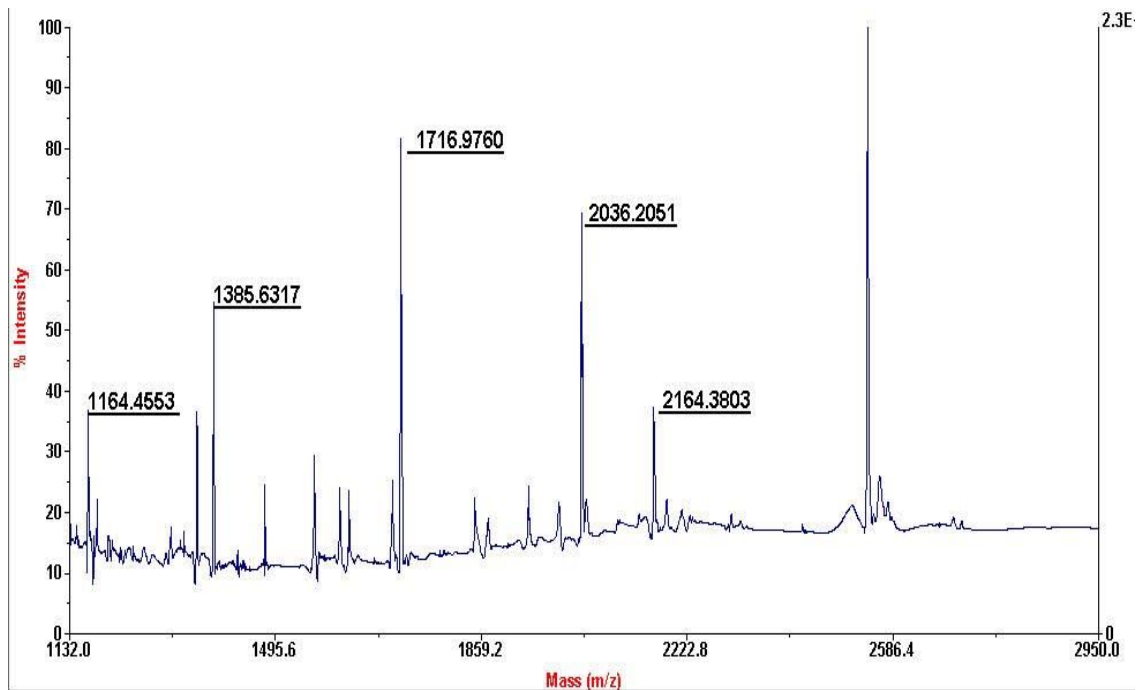

| Start - End | Observed  | Mr(expt)  | Mr(calc)  | Delta   | Miss Sequence                       |
|-------------|-----------|-----------|-----------|---------|-------------------------------------|
| 1 - 12      | 1494.4300 | 1493.4228 | 1493.6351 | -0.2124 | 1 -.MTCTDQKSHSQ.R.A ; Oxidation (M) |
| 46 - 67     | 2536.4240 | 2535.4167 | 2535.1609 | 0.2557  | 0 R.LCHMEPANHFVHAGDLQAMISK.E        |
| 68 - 79     | 1462.4837 | 1461.4764 | 1461.6307 | -0.1542 | 0 K.EFHLAATQDDCR.K                  |
| 111 - 129   | 2023.0182 | 2022.0109 | 2022.1010 | -0.0901 | 0 R.LQQPQPLPPPSGIHLSASR.T           |

No match to: 1120.1442, 1293.2546, 1482.4808, 1683.6845, 1715.7020, 1813.7861

281 Hcp beta-lactamase-like protein C1orf163



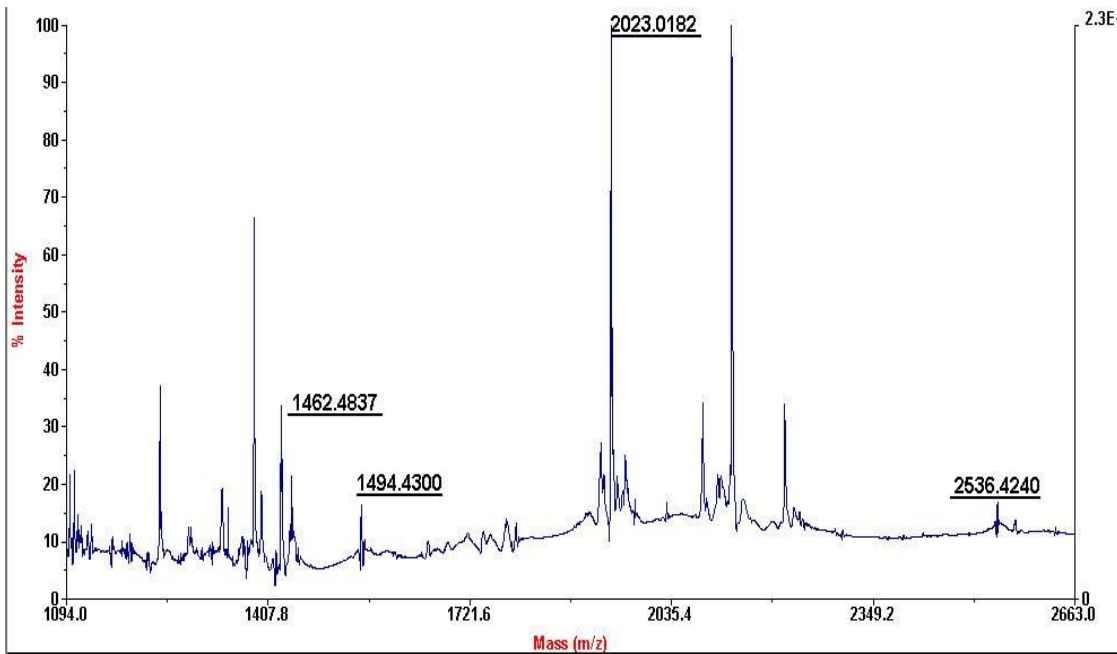

| Start - End | Observed  | Mr(expt)  | Mr(calc)  | Delta   | Miss Sequence                      |
|-------------|-----------|-----------|-----------|---------|------------------------------------|
| 33 - 39     | 882.4480  | 881.4407  | 881.3338  | 0.1069  | 0 K.DPDGCYR.L                      |
| 33 - 48     | 1940.7454 | 1939.7381 | 1939.9098 | -0.1717 | 1 K.DPDGCYRLVDYLEGIR.K             |
| 95 - 106    | 1427.7267 | 1426.7195 | 1426.6771 | 0.0424  | 1 R.CFLMACEKPGKK.S ; Oxidation (M) |
| 178 - 195   | 2082.8041 | 2081.7968 | 2081.9233 | -0.1265 | 1 K.ACDLGHIWACANASRMK.L ;          |

Oxidation (M)

No match to: 1385.5364, 2128.6678

282 T-complex protein 1 subunit zeta (TCP-1-zeta)

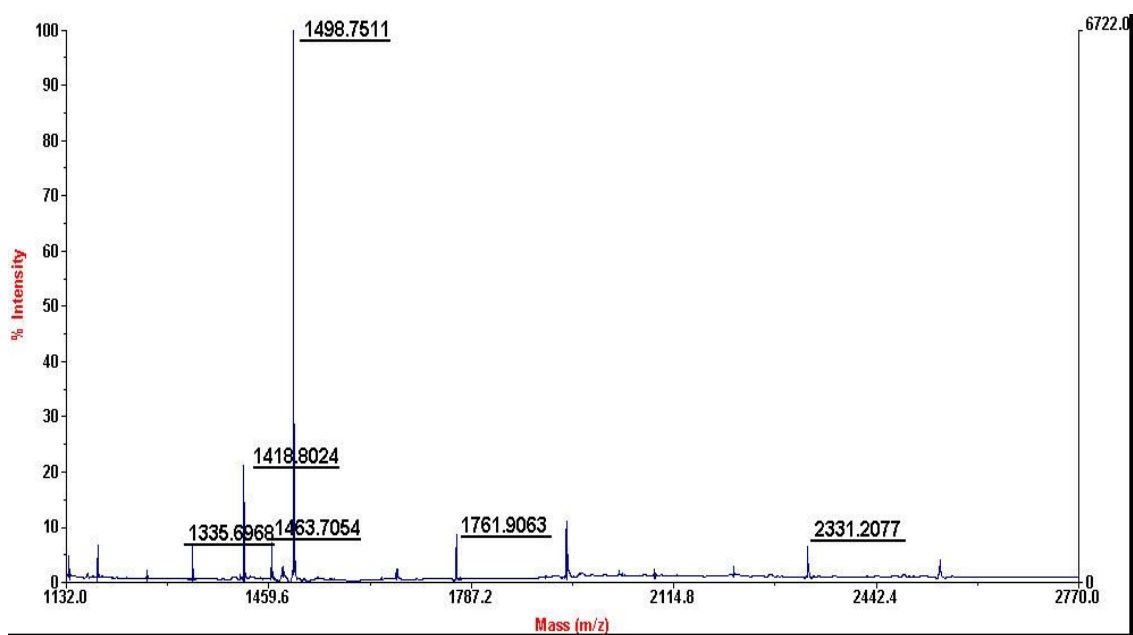

| Start - End   | Observed  | Mr(expt)  | Mr(calc)  | Delta   | Miss Sequence                    |
|---------------|-----------|-----------|-----------|---------|----------------------------------|
| 59 - 79       | 2331.2077 | 2330.2004 | 2330.2052 | -0.0049 | 0 K.DGNVLLHEMQIQHPTASLIAK.V      |
| Oxidation (M) |           |           |           |         |                                  |
| 105 - 117     | 1498.7511 | 1497.7438 | 1497.7576 | -0.0137 | 0 K.QADLYISEGLHPR.I              |
| 118 - 129     | 1335.6968 | 1334.6895 | 1334.7081 | -0.0186 | 1 R.IITEGFEEAAKEK.A              |
| 130 - 141     | 1418.8024 | 1417.7951 | 1417.7929 | 0.0022  | 1 K.ALQFLEEVKVSRE                |
| 142 - 153     | 1463.7054 | 1462.6981 | 1462.7086 | -0.0105 | 1 R.EMDRETLIDVAR.T Oxidation (M) |
| 450 - 465     | 1761.9063 | 1760.8991 | 1760.9309 | -0.0318 | 0 K.VLAQNSGFIDLQETLVK.I          |

No match to: 882.5355, 996.5641, 1182.5953, 1940.9360, 2543.4054

283 Alpha-1-antitrypsin precursor (Alpha-1 protease inhibitor) (Alpha-1-antiproteinase) - Homo sapiens (Human)

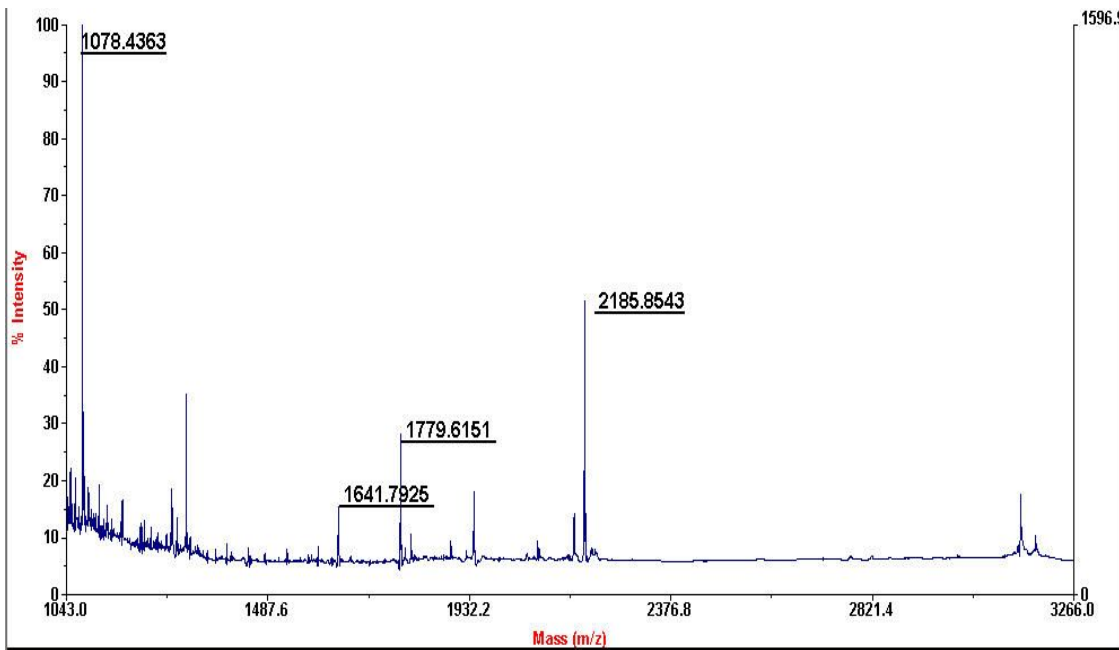

| Start - End | Observed  | Mr(expt)  | Mr(calc)  | Delta   | Miss | Sequence                |
|-------------|-----------|-----------|-----------|---------|------|-------------------------|
| 35 - 49     | 1779.6151 | 1778.6078 | 1778.7609 | -0.1530 | 0    | K.TDTSHHDQDHPTFNK.I     |
| 50 - 63     | 1641.7925 | 1640.7853 | 1640.8562 | -0.0710 | 0    | K.ITPNLAEFASLYR.Q       |
| 161 - 179   | 2185.8543 | 2184.8470 | 2185.0327 | -0.1858 | 1    | K.LYHSEAFTVNFGDTEEAKK.Q |
| 299 - 306   | 1078.4363 | 1077.4290 | 1077.5203 | -0.0913 | 1    | K.FLENEDRR.S            |

No match to: 1940.7366

284 Calreticulin precursor

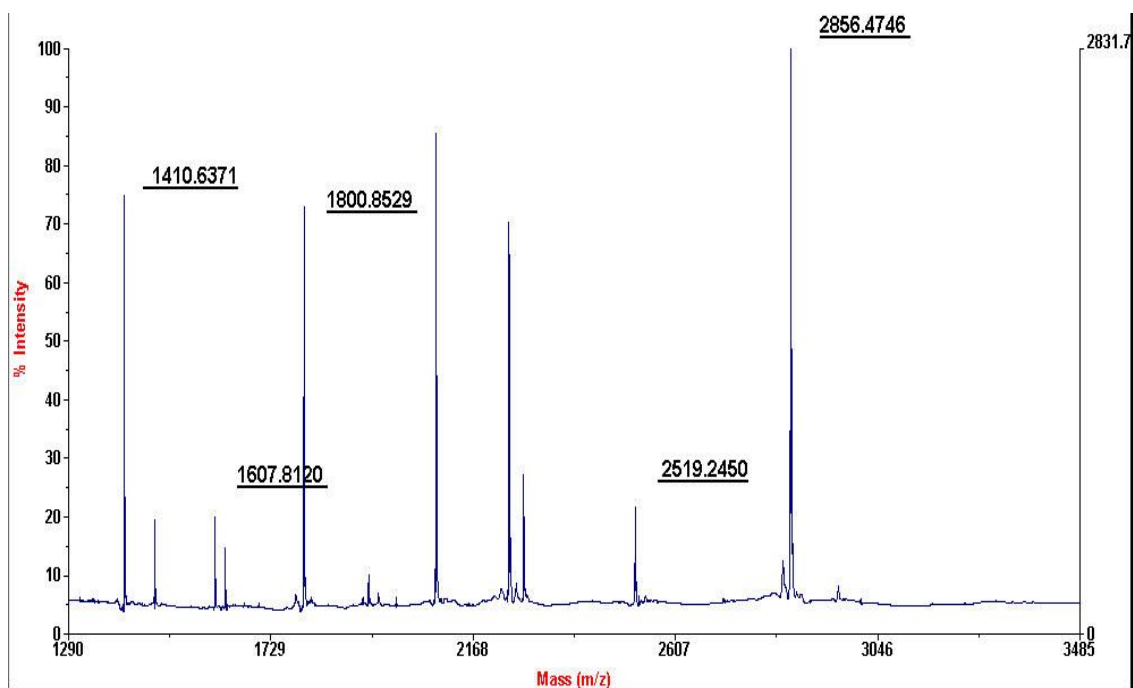

| Start - End | Observed  | Mr(expt)  | Mr(calc)  | Delta  | Miss Sequence                 |
|-------------|-----------|-----------|-----------|--------|-------------------------------|
| 25 - 36     | 1410.6371 | 1409.6298 | 1409.6212 | 0.0086 | 0 K.EQFLDGDGWTSR.W            |
| 74 - 87     | 1607.8120 | 1606.8047 | 1606.7667 | 0.0380 | 0 R.FYALSASFEPFSNK.G          |
| 163 - 185   | 2856.4746 | 2855.4673 | 2855.3800 | 0.0873 | 1 R.CKDDEFTHLYTLIVRPDNTYEVK.I |
| 186 - 207   | 2519.2450 | 2518.2377 | 2518.1864 | 0.0514 | 1 K.IDNSQVESGSLEDDWDFLPPKK.I  |
| 208 - 222   | 1800.8529 | 1799.8456 | 1799.8326 | 0.0131 | 1 K.IKDPDASKPEDWDER.A         |

No match to: 845.1194, 861.0781, 1629.7850, 2086.9801, 2245.0828, 2277.0773

285 Calreticulin precursor (CRP55)

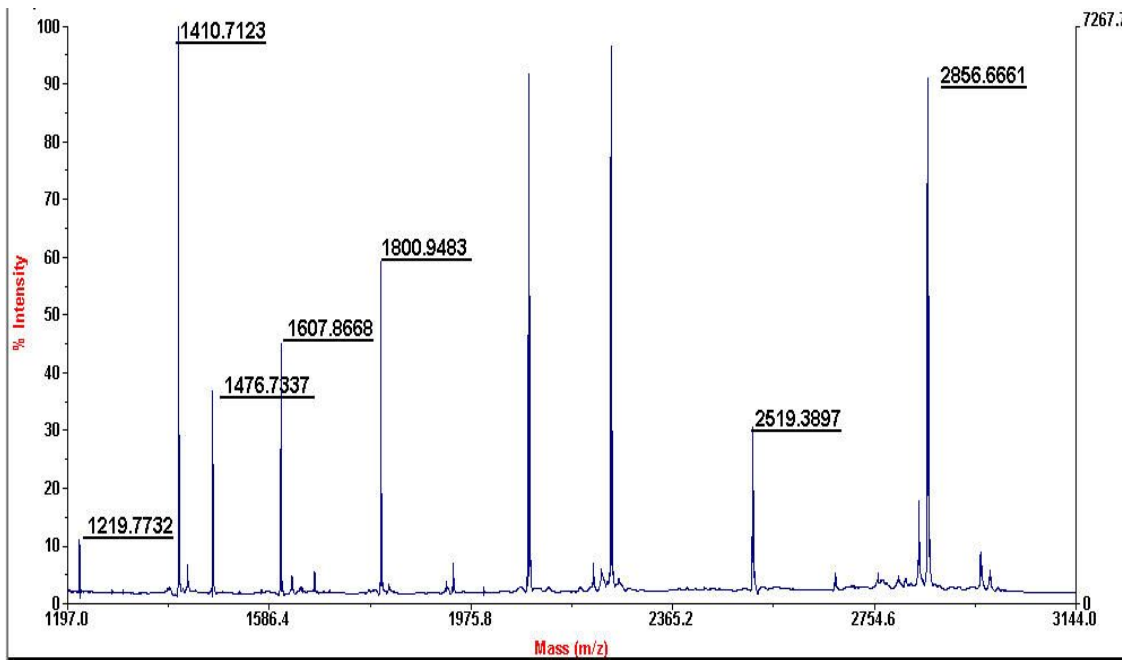

| Start - End | Observed  | Mr(expt)  | Mr(calc)  | Delta  | Miss Sequence                 |
|-------------|-----------|-----------|-----------|--------|-------------------------------|
| 25 - 36     | 1410.7123 | 1409.7050 | 1409.6212 | 0.0839 | 0 K.EQFLDGDGWTSR.W            |
| 74 - 87     | 1607.8668 | 1606.8596 | 1606.7667 | 0.0928 | 0 R.FYALSASFEPFSNK.G          |
| 88 - 98     | 1219.7732 | 1218.7659 | 1218.6972 | 0.0686 | 0 K.GQTLVVQFTVK.H             |
| 99 - 111    | 1476.7337 | 1475.7264 | 1475.6463 | 0.0800 | 0 K.HEQNIDCGGGYVK.L           |
| 144 - 151   | 1019.6150 | 1018.6077 | 1018.5600 | 0.0477 | 0 K.VHVIFNYK.G                |
| 163 - 185   | 2856.6661 | 2855.6588 | 2855.3800 | 0.2788 | 1 R.CKDDEFTHLYTLIVRPDNTYEVK.I |
| 186 - 207   | 2519.3897 | 2518.3825 | 2518.1864 | 0.1961 | 1 K.IDNSQVESGSLEDDWDFLPPKK.I  |
| 208 - 222   | 1800.9483 | 1799.9410 | 1799.8326 | 0.1085 | 1 K.IKDPDASKPEDWDER.A         |

No match to: 882.6053, 1941.0829, 2087.1189, 2245.2439, 2959.6990

286 Endoplasmin precursor

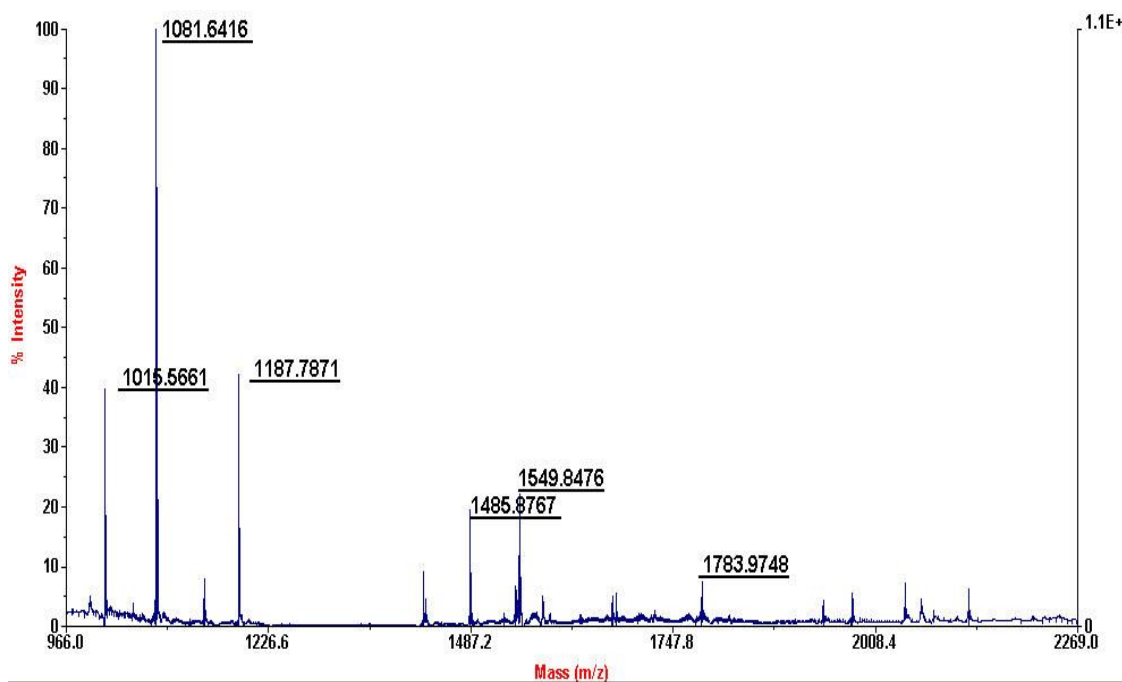

| Start - End | Observed  | Mr(expt)  | Mr(calc)  | Delta  | Miss Sequence                     |
|-------------|-----------|-----------|-----------|--------|-----------------------------------|
| 76 - 84     | 1081.6416 | 1080.6343 | 1080.5352 | 0.0990 | 0 K.FAFQAEVNR.M                   |
| 96 - 102    | 919.6249  | 918.6176  | 918.5287  | 0.0890 | 1 K.NKEIFLR.E                     |
| 385 - 395   | 1187.7871 | 1186.7798 | 1186.6710 | 0.1088 | 0 K.SILFVPTSAPR.G                 |
| 396 - 404   | 1015.5661 | 1014.5588 | 1014.4658 | 0.0930 | 0 R.GLFDEYGSK.K                   |
| 415 - 428   | 1783.9748 | 1782.9675 | 1782.8069 | 0.1606 | 1 R.RVFITDDDFHDMMPK.Y 2 Oxidation |
| (M)         |           |           |           |        |                                   |
| 614 - 625   | 1549.8476 | 1548.8403 | 1548.7646 | 0.0757 | 1 K.EFEPLLNWMKDK.A                |
| 742 - 754   | 1485.8767 | 1484.8694 | 1484.8021 | 0.0673 | 1 R.MLRSLNIDPDAK.V                |

No match to: 1978.0847, 2067.2642

287 Desmin

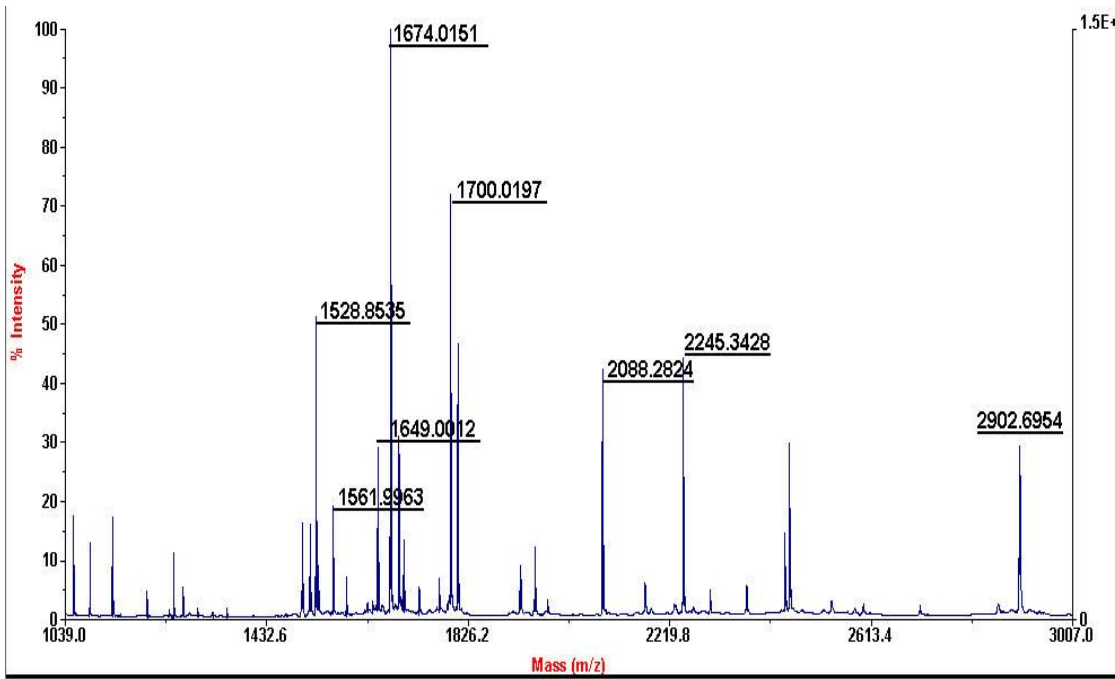

| Start - End | Observed  | Mr(expt)  | Mr(calc)  | Delta  | Miss | Sequence                       |
|-------------|-----------|-----------|-----------|--------|------|--------------------------------|
| 17 - 37     | 2088.2824 | 2087.2751 | 2087.0840 | 0.1911 | 0    | R.TFGGAPGFPLGSPLSSPVFPR.A      |
| 79 - 105    | 2902.6954 | 2901.6881 | 2901.4032 | 0.2848 | 0    | R.TPSSYGAGELLDNFLADAVNQEFLTR.T |
| 128 - 142   | 1674.0151 | 1673.0078 | 1672.8532 | 0.1546 | 0    | R.FLEQQNAALAAEVNR.L            |
| 151 - 163   | 1649.0012 | 1647.9940 | 1647.8467 | 0.1472 | 1    | R.VAELYEEELREL.R               |
| 176 - 189   | 1700.0197 | 1699.0124 | 1698.8537 | 0.1588 | 1    | R.VDVERDNLDDLR.L               |
| 194 - 212   | 2245.3428 | 2244.3355 | 2244.1386 | 0.1970 | 1    | K.LQEEIQLKEEAENNLAAFR.A        |
| 228 - 240   | 1561.9963 | 1560.9890 | 1560.8511 | 0.1379 | 1    | R.RIESLNEEIAFLK.K              |
| 356 - 369   | 1528.8535 | 1527.8463 | 1527.6954 | 0.1509 | 0    | R.FASEASGYQDNIAR.L             |

No match to: 1055.5682, 1501.8546, 1690.0887, 1791.0493, 1805.1089, 2444.4930, 2453.4763

288 Tubulin beta-2C chain

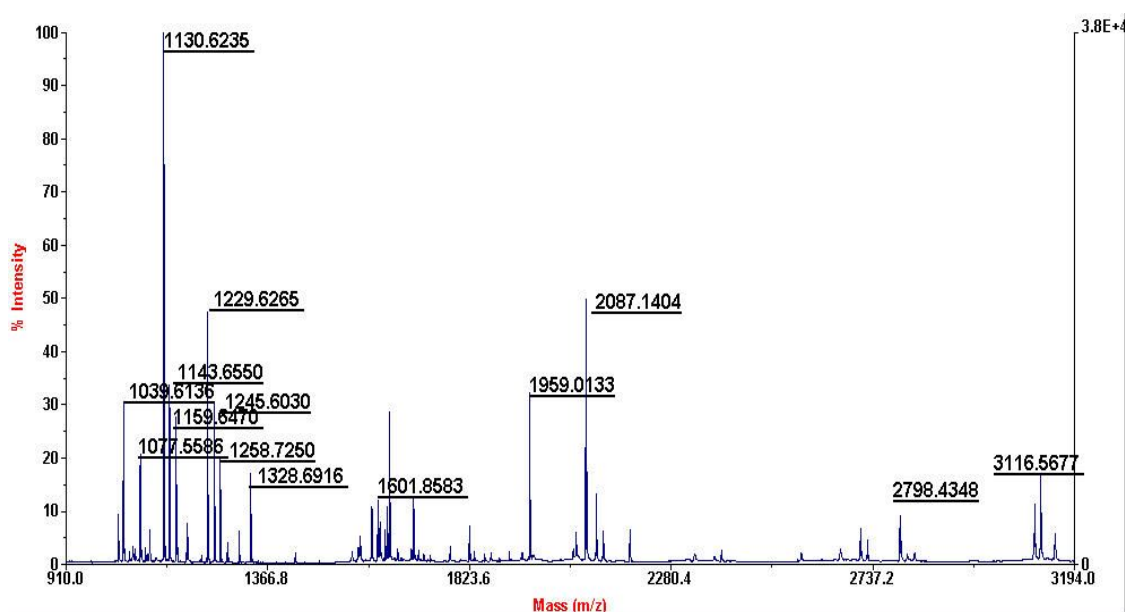

| Start - End                           | Observed  | Mr(expt)  | Mr(calc)  | Delta  | Miss Sequence                  |
|---------------------------------------|-----------|-----------|-----------|--------|--------------------------------|
| 20 - 46                               | 3116.5677 | 3115.5604 | 3115.4159 | 0.1445 | 0                              |
| <b>K.FWEVISDEHGIDPTGTYHGDSLQLER.I</b> |           |           |           |        |                                |
| 47 - 58                               | 1328.6916 | 1327.6843 | 1327.6408 | 0.0435 | 0 R.INVYYNEATGGK.Y             |
| 63 - 77                               | 1601.8583 | 1600.8510 | 1600.8131 | 0.0379 | 0 R.AVLVDLEPGTMDSVR.S          |
| 78 - 103                              | 2798.4348 | 2797.4275 | 2797.3361 | 0.0914 | 0                              |
| <b>R.SGPFQIFRPDNFVFGQSGAGNNWAK.G</b>  |           |           |           |        |                                |
| 104 - 121                             | 1959.0133 | 1958.0060 | 1957.9745 | 0.0315 | 0 K.GHYTEGAELVDSVLDVVR.K       |
| 104 - 122                             | 2087.1404 | 2086.1331 | 2086.0695 | 0.0636 | 1 K.GHYTEGAELVDSVLDVVRK.E      |
| 155 - 162                             | 1077.5586 | 1076.5513 | 1076.5250 | 0.0263 | 1 K.IREEYPDR.I                 |
| 242 - 251                             | 1130.6235 | 1129.6162 | 1129.5880 | 0.0282 | 0 R.FPGQLNADLR.K               |
| 242 - 252                             | 1258.7250 | 1257.7177 | 1257.6830 | 0.0348 | 1 R.FPGQLNADLRK.L              |
| 253 - 262                             | 1143.6550 | 1142.6477 | 1142.6270 | 0.0207 | 0 K.LAVNMVFPFR.L               |
| 253 - 262                             | 1159.6470 | 1158.6398 | 1158.6219 | 0.0178 | 0 K.LAVNMVFPFR.L Oxidation (M) |
| 310 - 318                             | 1039.6136 | 1038.6064 | 1038.5862 | 0.0201 | 0 R.YLTVAAVFR.G                |
| 381 - 390                             | 1229.6265 | 1228.6192 | 1228.5910 | 0.0282 | 0 R.ISEQFTAMFR.R               |
| 381 - 390                             | 1245.6030 | 1244.5957 | 1244.5860 | 0.0097 | 0 R.ISEQFTAMFR.R Oxidation (M) |

289 ATP synthase subunit beta



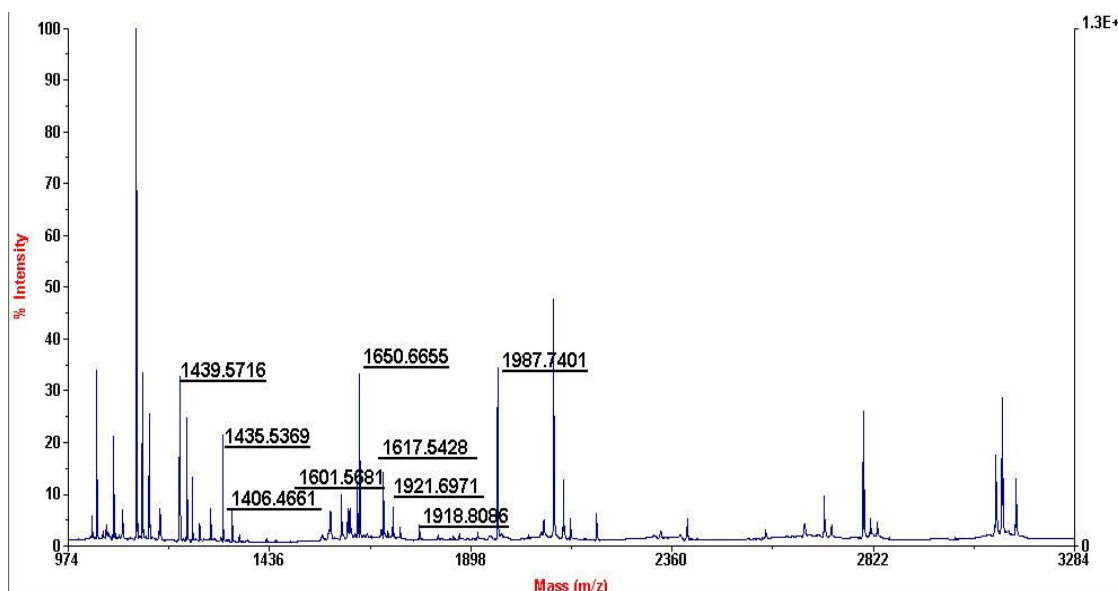

| Start - End | Observed  | Mr(expt)  | Mr(calc)  | Delta   | Miss Sequence                  |
|-------------|-----------|-----------|-----------|---------|--------------------------------|
| 95 - 109    | 1650.6655 | 1649.6582 | 1649.9101 | -0.2519 | 0 R.LVLEVAQHLGESTVR.T          |
| 125 - 143   | 1918.8086 | 1917.8013 | 1918.0888 | -0.2875 | 1 K.VLDSGAPIKIPVGPETLGR.I      |
| 226 - 239   | 1406.4661 | 1405.4588 | 1405.6739 | -0.2151 | 0 K.AHGGYSVFAGVGER.T           |
| 265 - 279   | 1601.5681 | 1600.5609 | 1600.8031 | -0.2423 | 0 K.VALVYQMNEPPGAR.A           |
| 265 - 279   | 1617.5428 | 1616.5355 | 1616.7981 | -0.2625 | 0 K.VALVYQMNEPPGAR.A Oxidation |
| <b>(M)</b>  |           |           |           |         |                                |
| 282 - 294   | 1439.5716 | 1438.5643 | 1438.7820 | -0.2177 | 0 R.VALTGLTVAEYFR.D            |
| 295 - 310   | 1921.6971 | 1920.6898 | 1920.9581 | -0.2683 | 0 R.DQEGQDVLLFIDNIFR.F         |
| 311 - 324   | 1435.5369 | 1434.5296 | 1434.7467 | -0.2171 | 0 R.FTQAGSEVSALLGR.I           |
| 388 - 406   | 1987.7401 | 1986.7329 | 1987.0262 | -0.2933 | 0 R.AIAELGIYPAVDPLDSTSR.I      |

No match to: 1483.4655, 1556.7165, 1831.5580, 2690.9711

290 Enoyl-CoA hydratase, mitochondrial precursor

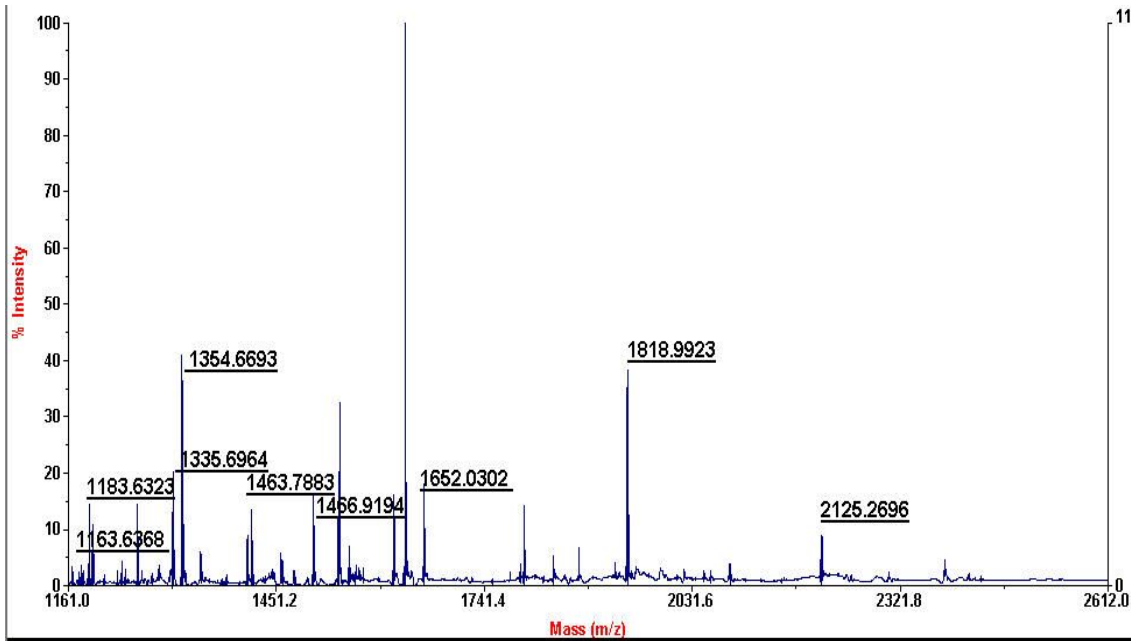

| Start - End | Observed  | Mr(expt)  | Mr(calc)  | Delta  | Miss Sequence                      |
|-------------|-----------|-----------|-----------|--------|------------------------------------|
| 42 - 56     | 1652.0302 | 1651.0230 | 1650.9529 | 0.0701 | 1 R.GKNNTVGLIQLNRPK.A              |
| 44 - 56     | 1466.9194 | 1465.9121 | 1465.8365 | 0.0756 | 0 K.NNTVGLIQLNRPK.A                |
| 75 - 92     | 1818.9923 | 1817.9850 | 1817.9047 | 0.0803 | 0 K.TFEEDPAVGAIVLTGGDK.A           |
| 119 - 127   | 1163.6368 | 1162.6295 | 1162.5883 | 0.0412 | 0 K.HWDHLTQVK.K                    |
| 158 - 178   | 2125.2696 | 2124.2623 | 2124.1328 | 0.1296 | 0 K.AQFAQPEILIGTIPGAGGTQR.L        |
| 186 - 197   | 1354.6693 | 1353.6620 | 1353.6268 | 0.0352 | 0 K.SLAMEMVLTGDR.I 2 Oxidation (M) |
| 262 - 272   | 1335.6964 | 1334.6891 | 1334.6143 | 0.0749 | 0 K.LFYSTFATDDR.K                  |
| 262 - 273   | 1463.7883 | 1462.7810 | 1462.7092 | 0.0717 | 1 K.LFYSTFATDDRK.E                 |
| 274 - 283   | 1183.6323 | 1182.6250 | 1182.5703 | 0.0547 | 1 K.EGMTAFVEKR.K Oxidation (M)     |

No match to: 1293.9213, 1412.7435, 1568.8855, 1591.9106

291 Protein-L-isoaspartate(D-aspartate) O-methyltransferase

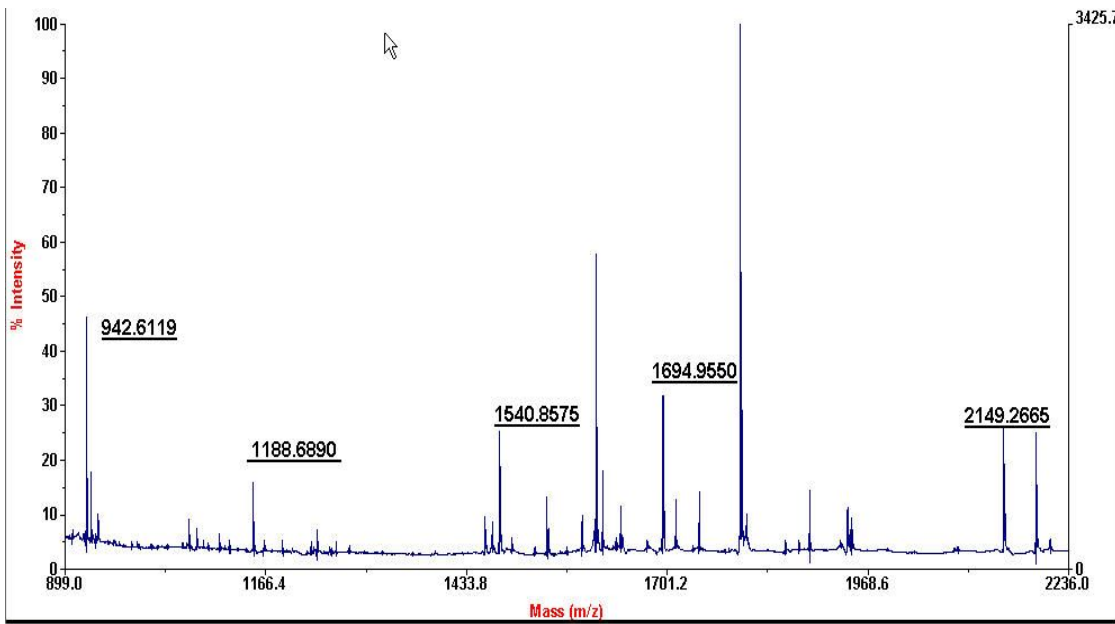

| Start - End | Observed  | Mr(expt)  | Mr(calc)  | Delta  | Miss Sequence                     |
|-------------|-----------|-----------|-----------|--------|-----------------------------------|
| 25 - 37     | 1540.8575 | 1539.8502 | 1539.7603 | 0.0899 | 1 K.TDKVFEVMLATDR.S Oxidation (M) |
| 82 - 98     | 1694.9550 | 1693.9477 | 1693.8458 | 0.1019 | 0 K.ALDVGSGSGILTACFAR.M           |
| 106 - 124   | 2149.2665 | 2148.2592 | 2148.1539 | 0.1054 | 1 K.VIGIDHIKELVDDSINNVR.K         |
| 125 - 135   | 1188.6890 | 1187.6817 | 1187.6146 | 0.0671 | 1 R.KDDPTLLSSGR.V                 |
| 136 - 144   | 942.6119  | 941.6046  | 941.5294  | 0.0751 | 0 R.VQLVVG DGR.M                  |

No match to: 1234.7121, 1604.9159, 1798.0038, 2192.1961

292 Triosephosphate isomerase

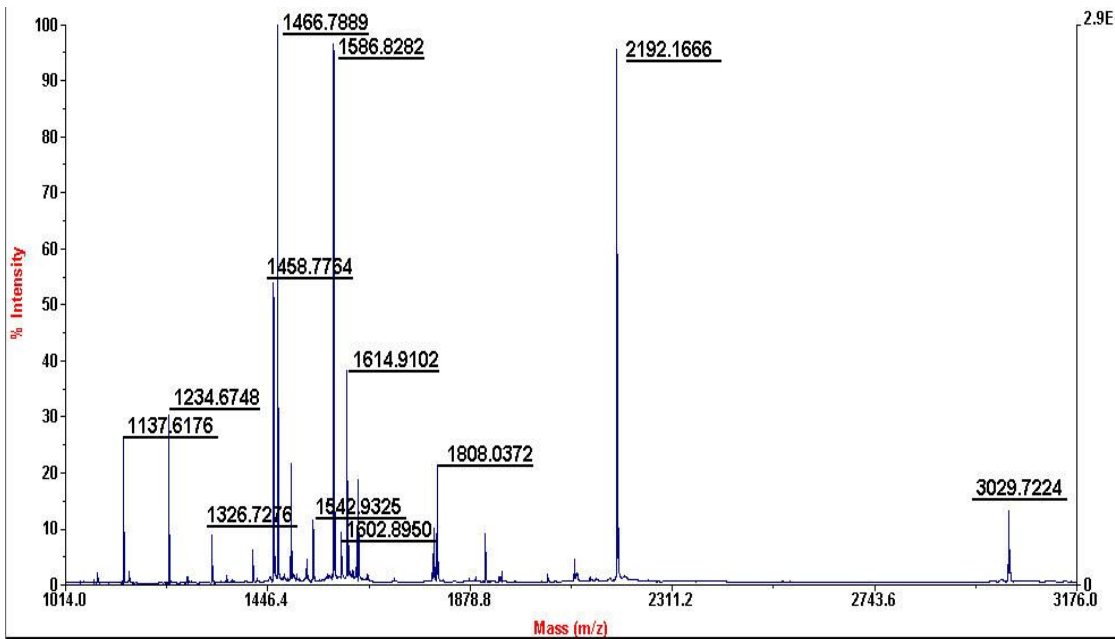

| Start - End | Observed | Mr(expt) | Mr(calc) | Delta | Miss Sequence |
|-------------|----------|----------|----------|-------|---------------|
|-------------|----------|----------|----------|-------|---------------|

|           |           |           |           |        |   |                          |
|-----------|-----------|-----------|-----------|--------|---|--------------------------|
| 7 - 14    | 954.5298  | 953.5226  | 953.4760  | 0.0466 | 0 | K.FFVGGNWK.M             |
| 19 - 33   | 1542.9325 | 1541.9252 | 1541.8777 | 0.0475 | 1 | R.KQSLGELIGTLNAAK.V      |
| 34 - 53   | 2192.1666 | 2191.1594 | 2191.0620 | 0.0974 | 0 | K.VPADTEVVCAPPTAYIDFAR.Q |
| 60 - 69   | 1137.6176 | 1136.6103 | 1136.5648 | 0.0455 | 0 | K.IAVAAQNCYK.V           |
| 86 - 99   | 1586.8282 | 1585.8209 | 1585.7307 | 0.0902 | 0 | K.DCGATWVVLGHSER.R       |
| 100 - 113 | 1614.9102 | 1613.9029 | 1613.8162 | 0.0868 | 1 | R.RHVFGESEDELIGQK.V      |
| 101 - 113 | 1458.7764 | 1457.7691 | 1457.7151 | 0.0541 | 0 | R.HVFGESDELIGQK.V        |
| 114 - 131 | 1808.0372 | 1807.0299 | 1806.9662 | 0.0638 | 0 | K.VAHALAEGLGVIACIGEK.L   |
| 161 - 175 | 1602.8950 | 1601.8877 | 1601.8817 | 0.0059 | 0 | K.VVLAYEPVWAIGTGK.T      |
| 176 - 188 | 1466.7889 | 1465.7816 | 1465.7161 | 0.0655 | 0 | K.TATPQQAQEVHEK.L        |
| 195 - 206 | 1234.6748 | 1233.6675 | 1233.5949 | 0.0726 | 0 | K.SNVSDAVAQSTR.I         |
| 207 - 219 | 1326.7276 | 1325.7203 | 1325.6649 | 0.0554 | 0 | R.IYGGSVTGATCK.E         |
| 220 - 248 | 3029.7224 | 3028.7151 | 3028.5757 | 0.1394 | 0 |                          |

K.ELASQPDVDGFLVGGASLKPEFVDIINAK.Q

No match to: 1495.8023, 1638.8637, 1911.0293

293 L-xylulose reductase

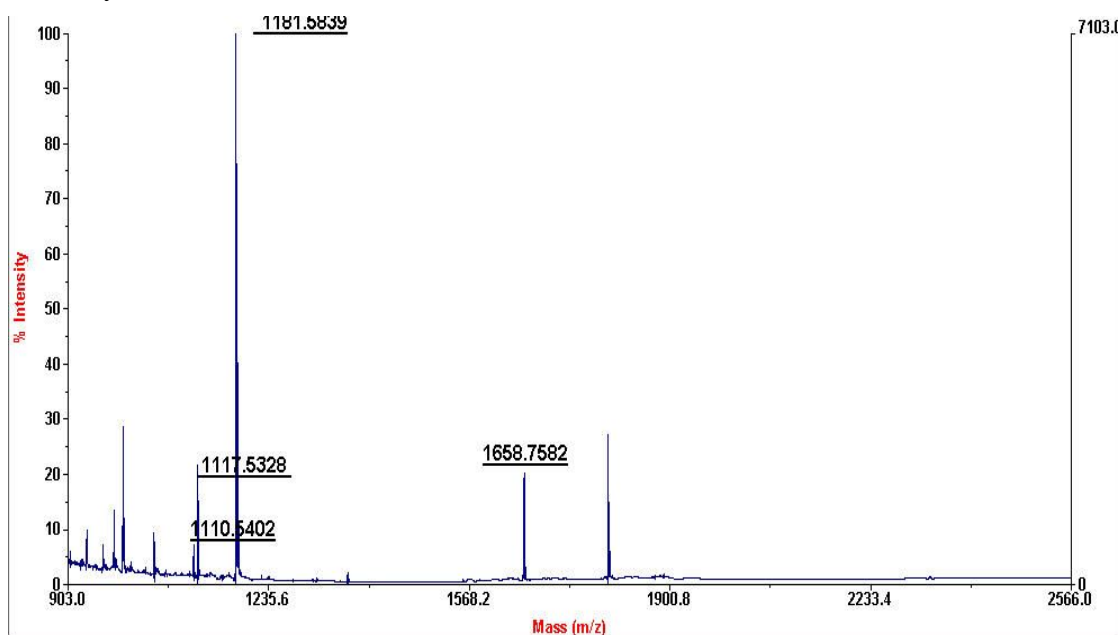

| Start - End | Observed  | Mr(expt)  | Mr(calc)  | Delta   | Miss Sequence      |
|-------------|-----------|-----------|-----------|---------|--------------------|
| 22 - 33     | 1181.5839 | 1180.5766 | 1180.6313 | -0.0547 | 0 R.GTVQALHATGAR.V |
| 40 - 49     | 1117.5328 | 1116.5255 | 1116.5775 | -0.0520 | 0 R.TQADLDLVR.E    |

|           |           |           |           |         |   |                              |
|-----------|-----------|-----------|-----------|---------|---|------------------------------|
| 126 - 141 | 1658.7582 | 1657.7509 | 1657.8206 | -0.0697 | 0 | R.GVPGAIVNVSSQCSQR.A         |
| 162 - 171 | 1110.5402 | 1109.5329 | 1109.5903 | -0.0574 | 0 | K.VMALELGPBK.I Oxidation (M) |

No match to: 979.5130, 994.4676, 1797.7968

294 Actin, gamma-enteric smooth muscle

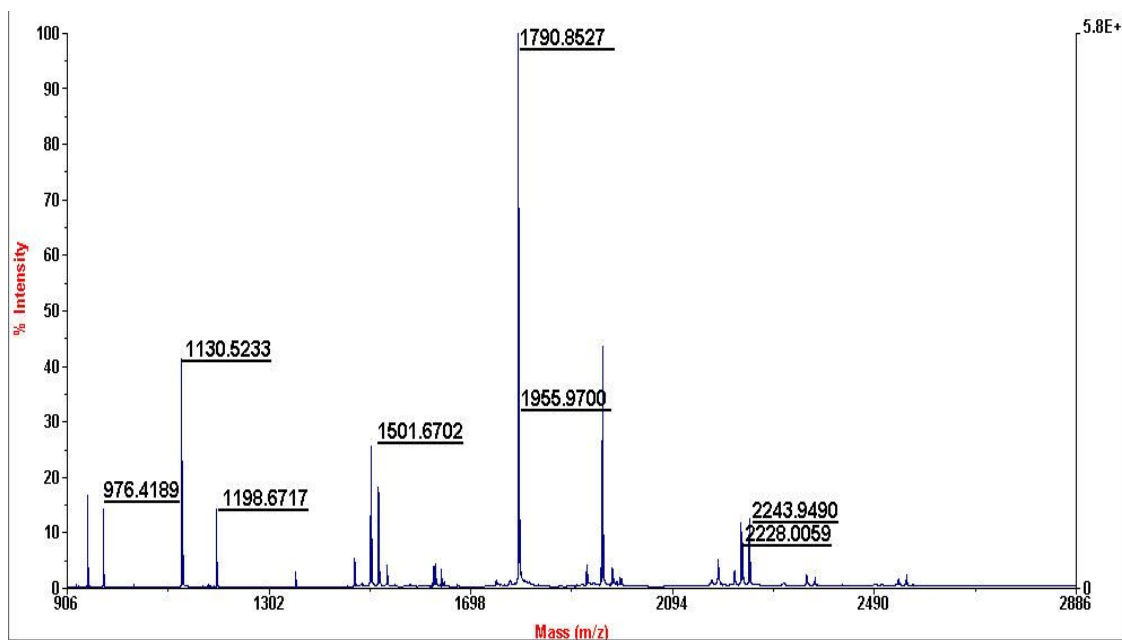

| Start - End                               | Observed  | Mr(expt)  | Mr(calc)  | Delta   | Miss Sequence               |
|-------------------------------------------|-----------|-----------|-----------|---------|-----------------------------|
| 20 - 29                                   | 976.4189  | 975.4116  | 975.4410  | -0.0294 | 0 K.AGFAGDDAPR.A            |
| 30 - 40                                   | 1198.6717 | 1197.6644 | 1197.6982 | -0.0338 | 0 R.AVFPSIVGRPR.H           |
| 86 - 96                                   | 1501.6702 | 1500.6629 | 1500.7262 | -0.0633 | 0 K.IWHHSFYNELR.V           |
| 97 - 114                                  | 1955.9700 | 1954.9627 | 1955.0364 | -0.0737 | 0 R.VAPEEHPTLLTEAPLNPK.A    |
| 149 - 178                                 | 3196.5423 | 3195.5350 | 3195.6023 | -0.0673 | 0                           |
| <b>R.TTGIVLDSGDGVTHNVPIYEGYALPHAIMR.L</b> |           |           |           |         |                             |
| 198 - 207                                 | 1130.5233 | 1129.5160 | 1129.5404 | -0.0244 | 0 R.GYSFVTTAER.E            |
| 240 - 255                                 | 1790.8527 | 1789.8454 | 1789.8846 | -0.0392 | 0 K.SYELPDGQVITIGNER.F      |
| 293 - 313                                 | 2228.0059 | 2226.9987 | 2227.0579 | -0.0592 | 0 K.DLYANNVLSGGTTMYPGIADR.M |
| 293 - 313                                 | 2243.9490 | 2242.9417 | 2243.0528 | -0.1111 | 0 K.DLYANNVLSGGTTMYPGIADR.M |

Oxidation (M)

295 Peroxiredoxin-1

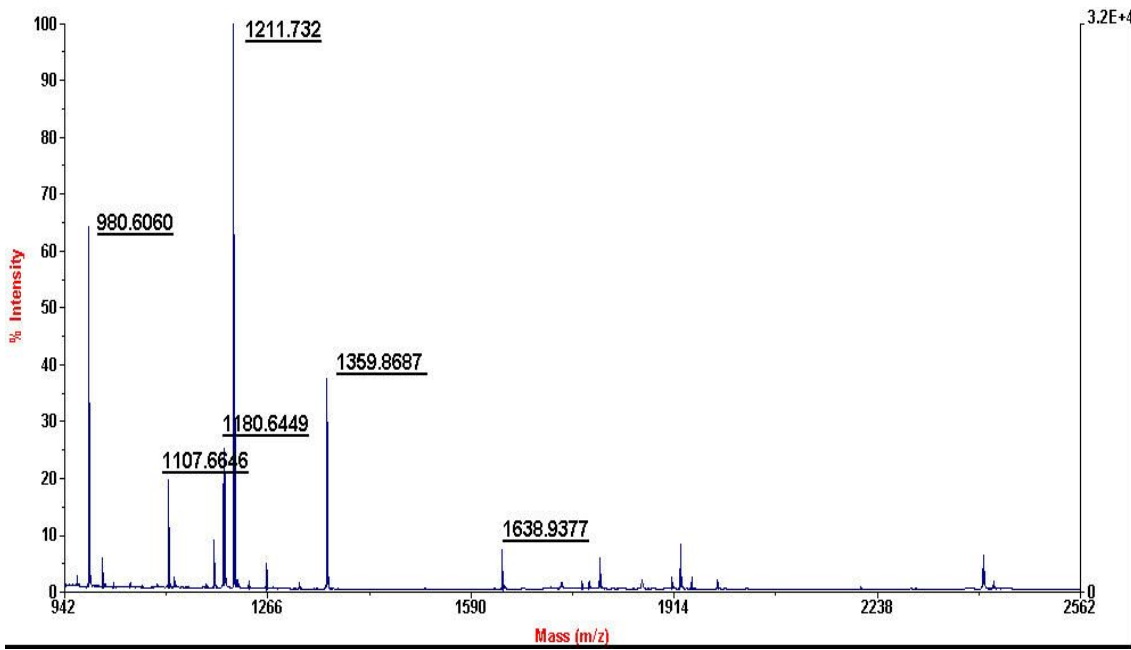

| Start - End | Observed  | Mr(expt)  | Mr(calc)  | Delta  | Miss Sequence                        |
|-------------|-----------|-----------|-----------|--------|--------------------------------------|
| 8 - 16      | 980.6060  | 979.5987  | 979.5239  | 0.0747 | 0 K.IGHPAPNFK.A                      |
| 17 - 27     | 1180.6449 | 1179.6377 | 1179.5594 | 0.0782 | 0 K.ATAVMPDGQFK.D Oxidation (M)      |
| 94 - 109    | 1638.9377 | 1637.9305 | 1637.8447 | 0.0858 | 0 K.QGGLGPMNIPLVSDPK.R Oxidation (M) |
| 111 - 120   | 1107.6646 | 1106.6573 | 1106.5972 | 0.0602 | 0 R.TIAQDYGVLK.A                     |
| 129 - 140   | 1359.8687 | 1358.8614 | 1358.7922 | 0.0692 | 1 R.GLFIIDDKGILR.Q                   |
| 141 - 151   | 1211.7328 | 1210.7255 | 1210.6670 | 0.0585 | 0 R.QITVNDLPVGR.S                    |

No match to: 1002.5594, 1194.7041, 1639.9985, 1794.0713, 1862.1850, 1923.1324, 2405.3781

296 Melanoma antigen recognized by T-cells 1

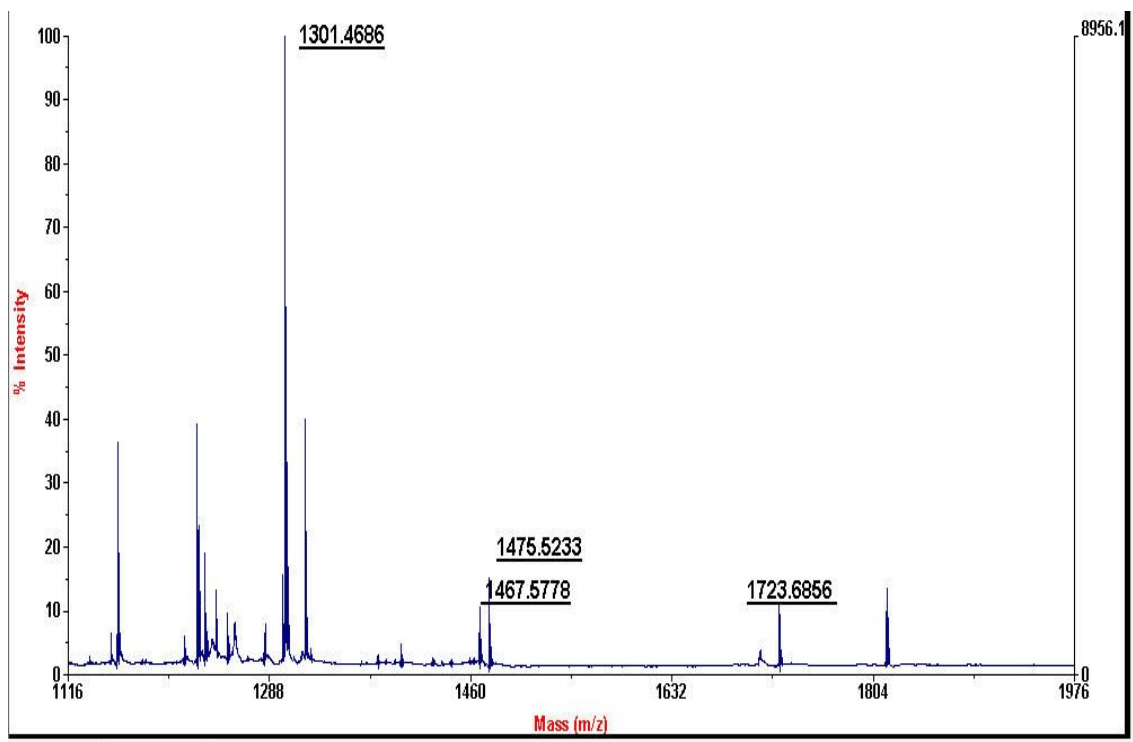

| Start - End | Observed  | Mr(expt)  | Mr(calc)  | Delta   | Miss Sequence        |
|-------------|-----------|-----------|-----------|---------|----------------------|
| 1 - 14      | 1723.6856 | 1722.6783 | 1722.8188 | -0.1404 | 1 -.MPREDAHFIYGYPK.K |
| 4 - 15      | 1467.5778 | 1466.5705 | 1466.7194 | -0.1488 | 1 R.EDA HFIYGYPK.K.G |
| 73 - 82     | 1301.4686 | 1300.4613 | 1300.5731 | -0.1118 | 1 R.RCPQEGFDHR.D     |
| 74 - 85     | 1475.5233 | 1474.5160 | 1474.6259 | -0.1099 | 1 R.CPQEGFDHRDSK.V   |

No match to: 1012.4647, 1157.4787, 1226.3770, 1232.4459, 1318.4441, 1815.5837

297 Rho GDP-dissociation inhibitor 1

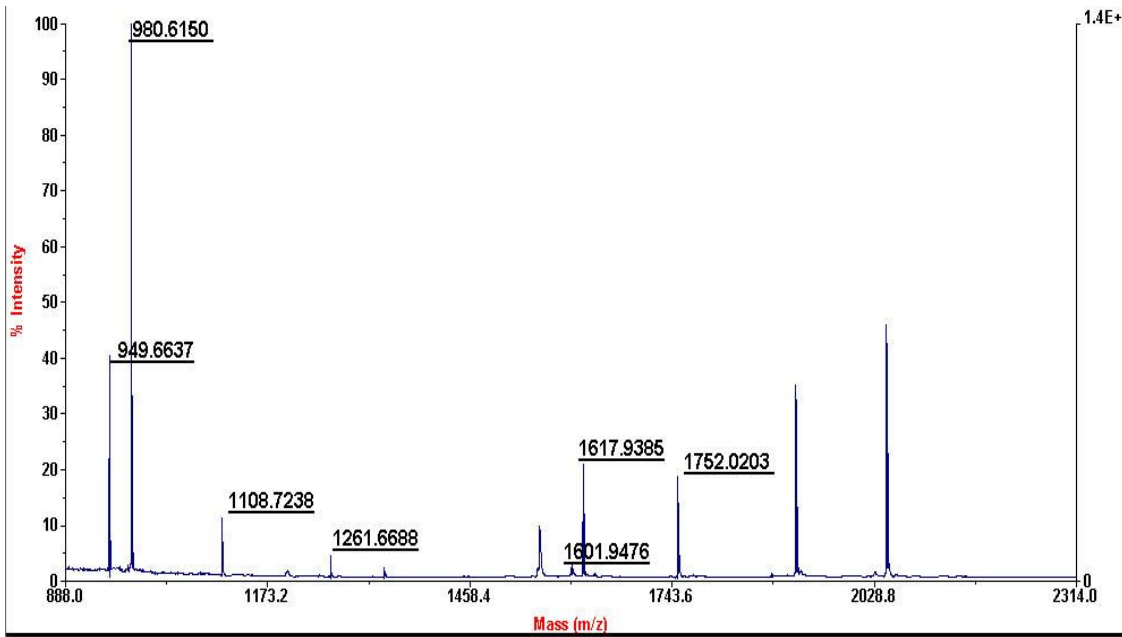

| Start - End | Observed  | Mr(expt)  | Mr(calc)  | Delta  | Miss Sequence                   |
|-------------|-----------|-----------|-----------|--------|---------------------------------|
| 51 - 58     | 949.6637  | 948.6564  | 948.5392  | 0.1172 | 1 K.YKEALLGR.V                  |
| 128 - 134   | 980.6150  | 979.6078  | 979.4875  | 0.1202 | 0 K.YIQHTYR.K                   |
| 128 - 135   | 1108.7238 | 1107.7165 | 1107.5825 | 0.1340 | 1 K.YIQHTYRK.G                  |
| 139 - 152   | 1601.9476 | 1600.9403 | 1600.7555 | 0.1847 | 1 K.IDKTDYMVGSYGPR.A            |
| 139 - 152   | 1617.9385 | 1616.9313 | 1616.7505 | 0.1808 | 1 K.IDKTDYMVGSYGPR.A Oxidation  |
| <b>(M)</b>  |           |           |           |        |                                 |
| 142 - 152   | 1261.6688 | 1260.6616 | 1260.5445 | 0.1171 | 0 K.TDYMVGSYGPR.A Oxidation (M) |
| 153 - 167   | 1752.0203 | 1751.0130 | 1750.8301 | 0.1829 | 0 R.AEEYFLTPVEEAPK.G            |

No match to: 1201.8115, 1557.1211, 1918.1466, 2046.2275

298 Vimentin - Homo sapiens (Human)



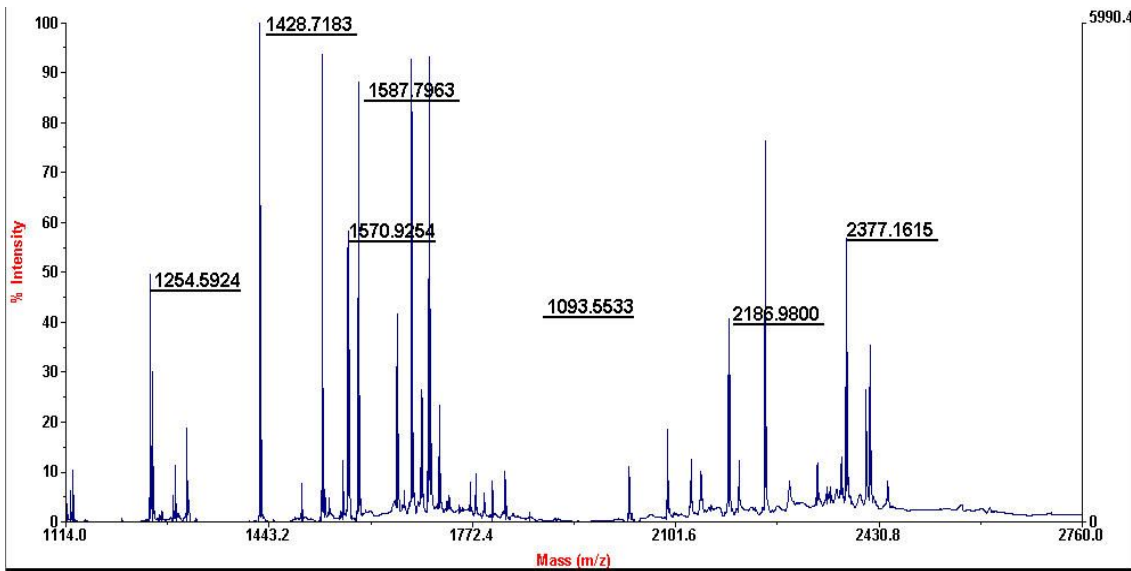

| Start - End | Observed  | Mr(expt)  | Mr(calc)  | Delta   | Miss Sequence               |
|-------------|-----------|-----------|-----------|---------|-----------------------------|
| 51 - 64     | 1428.7183 | 1427.7110 | 1427.7045 | 0.0065  | 0 R.SLYASSPGGVYATR.S        |
| 101 - 113   | 1587.7963 | 1586.7890 | 1586.7900 | -0.0010 | 1 R.TNEKVELQELNDR.F         |
| 146 - 155   | 1254.5924 | 1253.5851 | 1253.5598 | 0.0253  | 0 R.LGDLYEEEMR.E            |
| 295 - 304   | 1093.5533 | 1092.5460 | 1092.5200 | 0.0260  | 0 K.FADLSEAANR.N            |
| 322 - 342   | 2377.1615 | 2376.1543 | 2376.1591 | -0.0048 | 1 R.QVQSLTCEVDALKGTNESLER.Q |
| 346 - 364   | 2186.9800 | 2185.9727 | 2185.9586 | 0.0141  | 0 R.EMEENFAVEAANYQDTIGR.L   |
| 411 - 424   | 1570.9254 | 1569.9181 | 1569.8878 | 0.0303  | 0 R.ISLPLPNFSSLNLR.E        |

No match to: 1250.6418, 1528.7029, 1648.8830, 1673.8660, 1689.9334, 1701.9140, 1718.8870, 2245.1295, 2306.7200, 2415.2084

299 Desmin

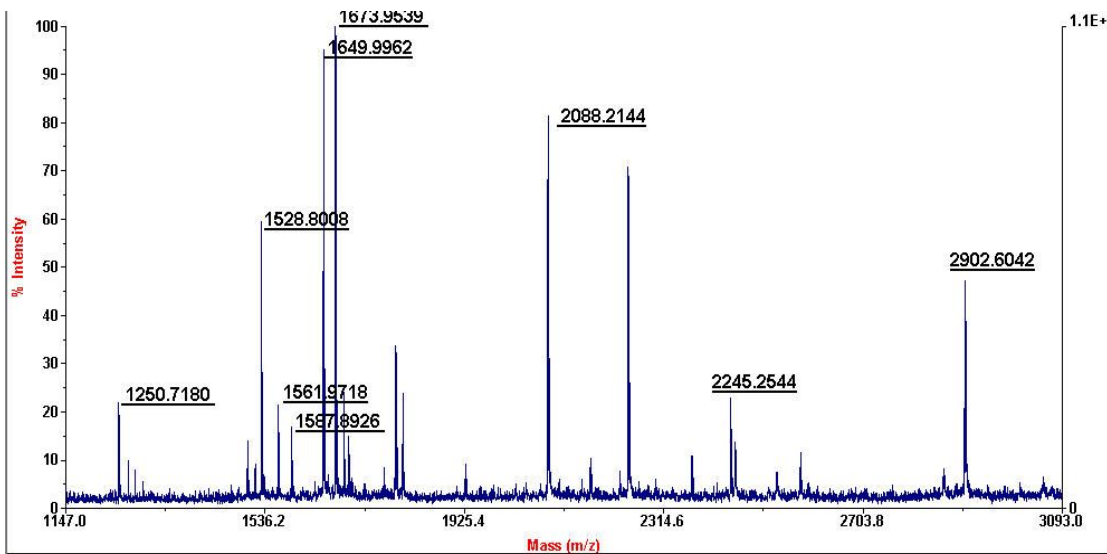

| Start - End | Observed | Mr(expt) | Mr(calc) | Delta | Miss Sequence |
|-------------|----------|----------|----------|-------|---------------|
|-------------|----------|----------|----------|-------|---------------|

|                                   |           |           |           |        |   |                           |
|-----------------------------------|-----------|-----------|-----------|--------|---|---------------------------|
| 17 - 37                           | 2088.2144 | 2087.2071 | 2087.0840 | 0.1231 | 0 | R.TFGGAPGFPLGSPLSSPVFPR.A |
| 79 - 105                          | 2902.6042 | 2901.5969 | 2901.4032 | 0.1937 | 0 |                           |
| R.TPSSYGAGELLDLDFSLADAVNQEFLTTR.T |           |           |           |        |   |                           |
| 106 - 118                         | 1587.8926 | 1586.8853 | 1586.7900 | 0.0953 | 1 | R.TNEKVELQELNDR.F         |
| 128 - 142                         | 1673.9539 | 1672.9466 | 1672.8532 | 0.0934 | 0 | R.FLEQQNAALAAEVNR.L       |
| 151 - 160                         | 1250.7180 | 1249.7107 | 1249.6190 | 0.0917 | 0 | R.VAELYEEELR.E            |
| 194 - 212                         | 2245.2544 | 2244.2471 | 2244.1386 | 0.1086 | 1 | K.LQEEIQLKEEAENNLAAFR.A   |
| 228 - 240                         | 1561.9718 | 1560.9645 | 1560.8511 | 0.1134 | 1 | R.RIESLNEEIAFLK.K         |
| 356 - 369                         | 1528.8008 | 1527.7936 | 1527.6954 | 0.0982 | 0 | R.FASEASGYQDNIAR.L        |
| 416 - 429                         | 1649.9962 | 1648.9889 | 1648.8937 | 0.0952 | 0 | R.INLP IQTYSALNFR.E       |

No match to: 1055.5620, 1690.0594, 1791.0010, 1805.0525, 2444.4119

### 300 Protein disulfide-isomerase A3 precursor

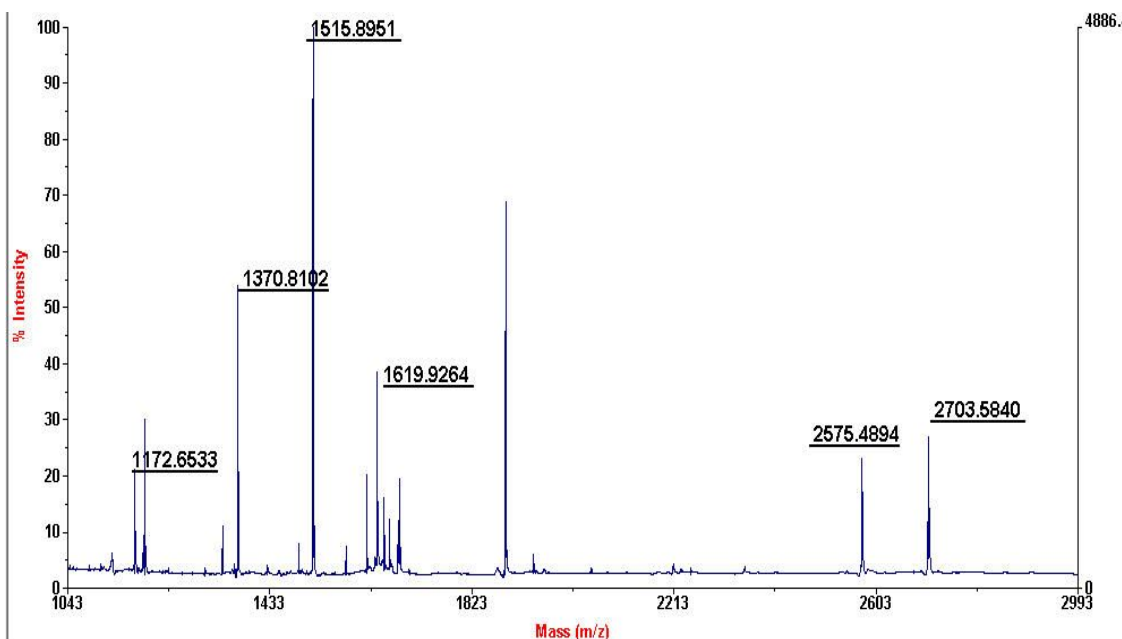

| Start - End | Observed  | Mr(expt)  | Mr(calc)  | Delta  | Miss Sequence                   |
|-------------|-----------|-----------|-----------|--------|---------------------------------|
| 259 - 271   | 1619.9264 | 1618.9191 | 1618.7766 | 0.1425 | 0 K.DLLIYYDVDYEK.N              |
| 305 - 329   | 2703.5840 | 2702.5768 | 2702.3915 | 0.1852 | 1 R.KTFSHELSDFGLESTAGEIPVVAIR.T |
| 306 - 329   | 2575.4894 | 2574.4821 | 2574.2966 | 0.1855 | 0 K.TFSHELSDFGLESTAGEIPVVAIR.T  |

|           |           |           |           |        |   |                  |
|-----------|-----------|-----------|-----------|--------|---|------------------|
| 336 - 344 | 1172.6533 | 1171.6460 | 1171.5332 | 0.1128 | 0 | K.FVMQEEFSR.D    |
| 352 - 363 | 1515.8951 | 1514.8879 | 1514.7518 | 0.1361 | 1 | R.FLQDYFDGNLKR.Y |
| 472 - 482 | 1370.8102 | 1369.8029 | 1369.6878 | 0.1152 | 0 | R.ELSDFISYLQR.E  |

No match to: 882.6447, 1190.6483, 1639.8918, 1887.1332

301 Protein disulfide-isomerase A3 precursor (EC 5.3.4.1)

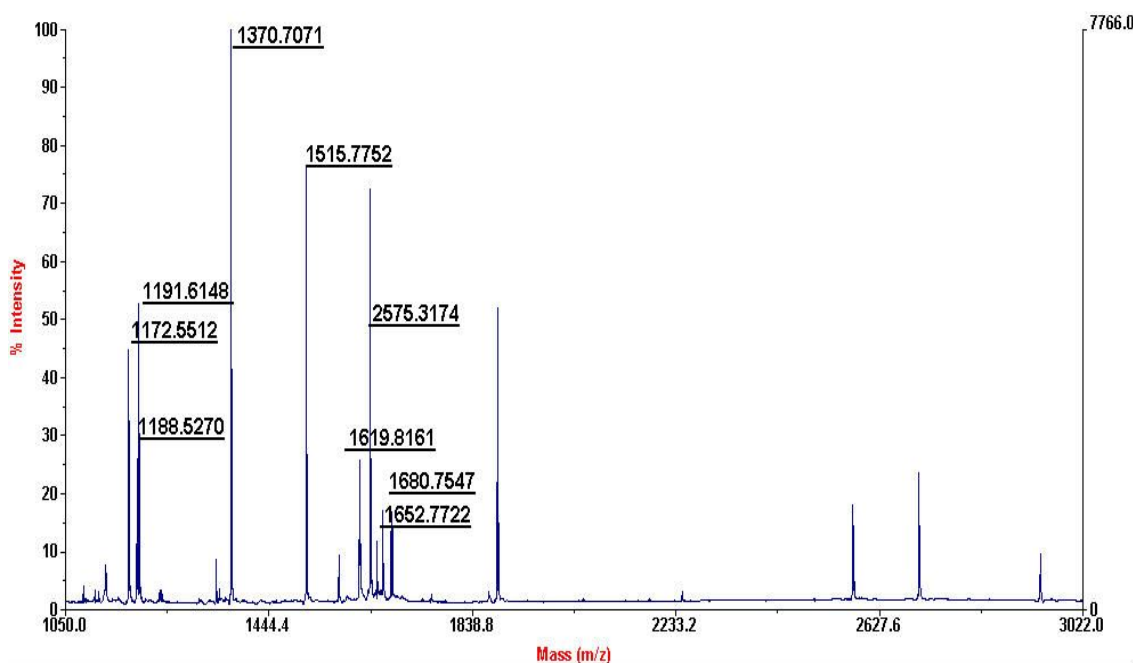

| Start - End | Observed  | Mr(expt)  | Mr(calc)  | Delta   | Miss Sequence                      |
|-------------|-----------|-----------|-----------|---------|------------------------------------|
| 63 - 73     | 1191.6148 | 1190.6075 | 1190.5931 | 0.0144  | 0 R.LAPEYEEAATR.L                  |
| 105 - 119   | 1652.7722 | 1651.7650 | 1651.7590 | 0.0059  | 1 K.IFRDGEEAGAYDGPR.T              |
| 259 - 271   | 1619.8161 | 1618.8088 | 1618.7766 | 0.0322  | 0 K.DLLIYYDVDYEK.N                 |
| 306 - 329   | 2575.3174 | 2574.3101 | 2574.2966 | 0.0135  | 0 K.TFSHELSDFGLESTAGEIPVVAIR.T     |
| 336 - 344   | 1172.5512 | 1171.5439 | 1171.5332 | 0.0107  | 0 K.FVMQEEFSR.D                    |
| 336 - 344   | 1188.5270 | 1187.5198 | 1187.5281 | -0.0084 | 0 K.FVMQEEFSR.D Oxidation (M)      |
| 352 - 363   | 1515.7752 | 1514.7679 | 1514.7518 | 0.0162  | 1 R.FLQDYFDGNLKR.Y                 |
| 434 - 448   | 1680.7547 | 1679.7475 | 1679.7461 | 0.0014  | 0 K.MDATANDVPSPYEV.R Oxidation (M) |
| 472 - 482   | 1370.7071 | 1369.6999 | 1369.6878 | 0.0121  | 0 R.ELSDFISYLQR.E                  |

No match to: 1127.8829, 1639.7720, 1887.0049, 2702.4085

302 Selenium-binding protein 1 –

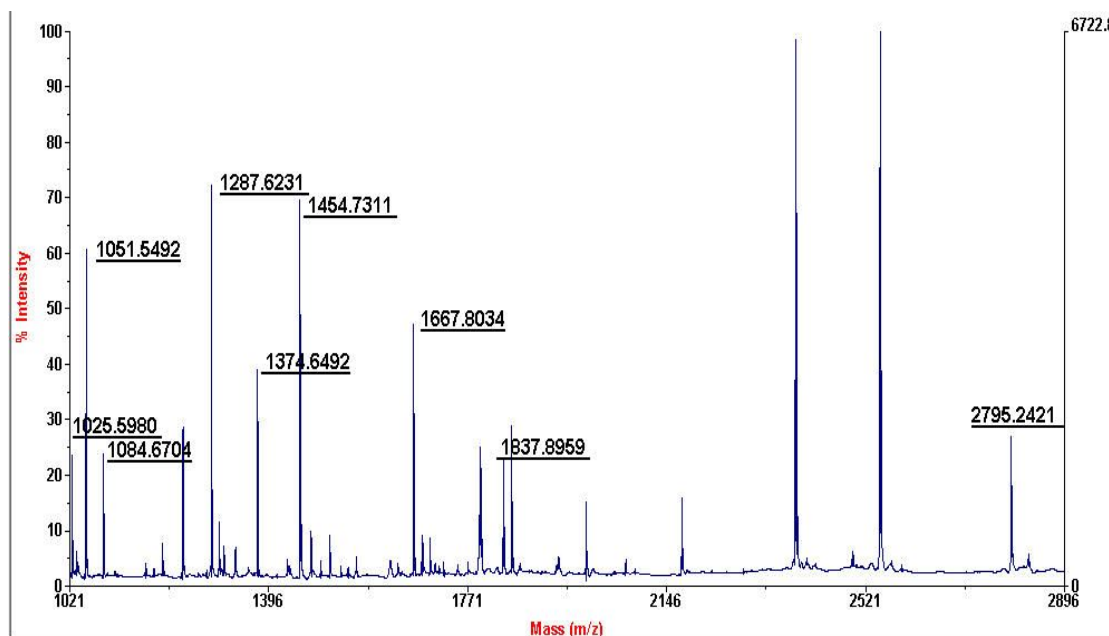

| Start - End                         | Observed  | Mr(expt)  | Mr(calc)  | Delta   | Miss Sequence          |
|-------------------------------------|-----------|-----------|-----------|---------|------------------------|
| 24 - 34                             | 1454.7311 | 1453.7239 | 1453.7275 | -0.0037 | 0 R.EEIVYLPCIYR.N      |
| 53 - 62                             | 1287.6231 | 1286.6159 | 1286.6190 | -0.0031 | 0 K.SPQYCQVIHR.L       |
| 94 - 103                            | 1084.6704 | 1083.6631 | 1083.6652 | -0.0021 | 0 K.LVLPLSISSR.I       |
| 196 - 211                           | 1837.8959 | 1836.8886 | 1836.9305 | -0.0419 | 0 R.HNVMISTEWAAPNVLR.D |
| 212 - 235                           | 2795.2421 | 2794.2348 | 2794.2776 | -0.0428 | 0                      |
| <b>R.DGFNPADVEAGLYGSHLYVWDWQR.H</b> |           |           |           |         |                        |
| 246 - 254                           | 1025.5980 | 1024.5907 | 1024.5917 | -0.0010 | 0 K.DGLIPLEIR.F        |
| 321 - 333                           | 1667.8034 | 1666.7962 | 1666.8256 | -0.0294 | 0 R.FLYFSNWLHGDLR.Q    |
| 334 - 344                           | 1374.6492 | 1373.6419 | 1373.6688 | -0.0269 | 0 R.QYDISDPQRPR.L      |
| 412 - 419                           | 1051.5492 | 1050.5420 | 1050.5498 | -0.0079 | 0 K.QFYPLDIR.E         |

No match to: 1050.4935, 1233.6409, 1792.9402, 1852.9382, 1993.9445, 2389.1240, 2547.3186

303 Tryptophanyl-tRNA synthetase, cytoplasmic

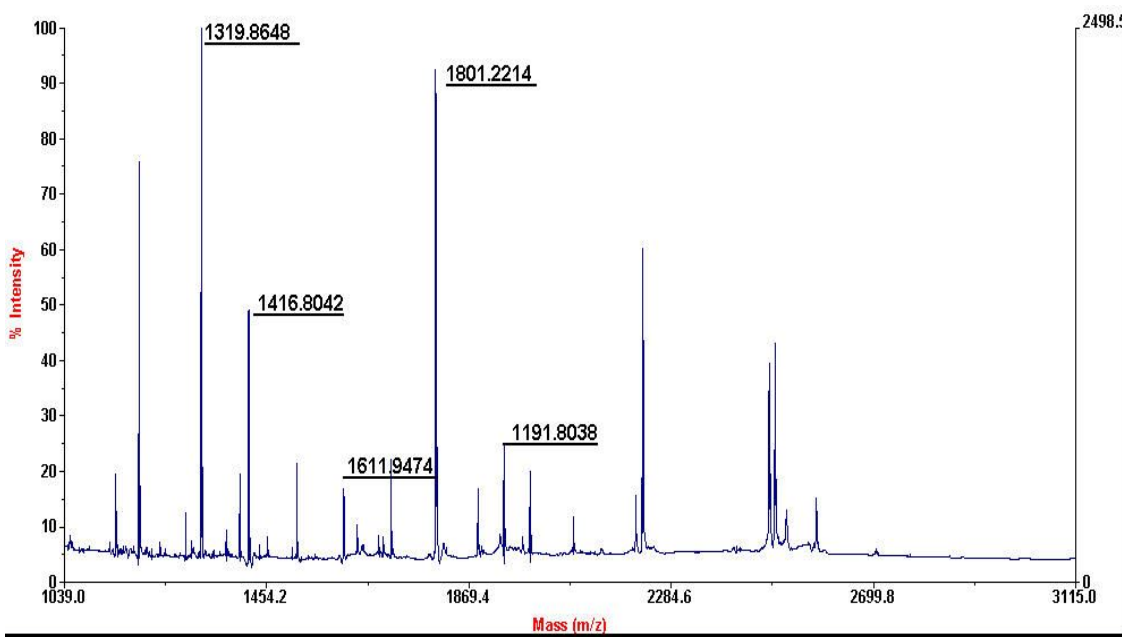

| Start - End | Observed  | Mr(expt)  | Mr(calc)  | Delta  | Miss Sequence          |
|-------------|-----------|-----------|-----------|--------|------------------------|
| 97 - 106    | 1191.8038 | 1190.7965 | 1190.6659 | 0.1306 | 1 K.GIDYDKLIVR.F       |
| 123 - 133   | 1319.8648 | 1318.8575 | 1318.7007 | 0.1568 | 0 R.ATGQRPHHFLR.R      |
| 257 - 264   | 972.6428  | 971.6355  | 971.5189  | 0.1167 | 0 K.HVTFNQVK.G         |
| 265 - 277   | 1416.8042 | 1415.7970 | 1415.6391 | 0.1578 | 0 K.GIFGFTDSDCIGK.I    |
| 375 - 388   | 1611.9474 | 1610.9401 | 1610.7550 | 0.1852 | 1 K.HAFSGGRDTIEEHR.Q   |
| 433 - 448   | 1801.2214 | 1800.2141 | 1800.0257 | 0.1884 | 0 K.ALIEVLQPLIAEHQAR.R |

No match to: 1817.4960, 1941.1535, 2225.2916, 2485.5710, 2497.5064, 2884.7486

304 Selenium-binding protein 1

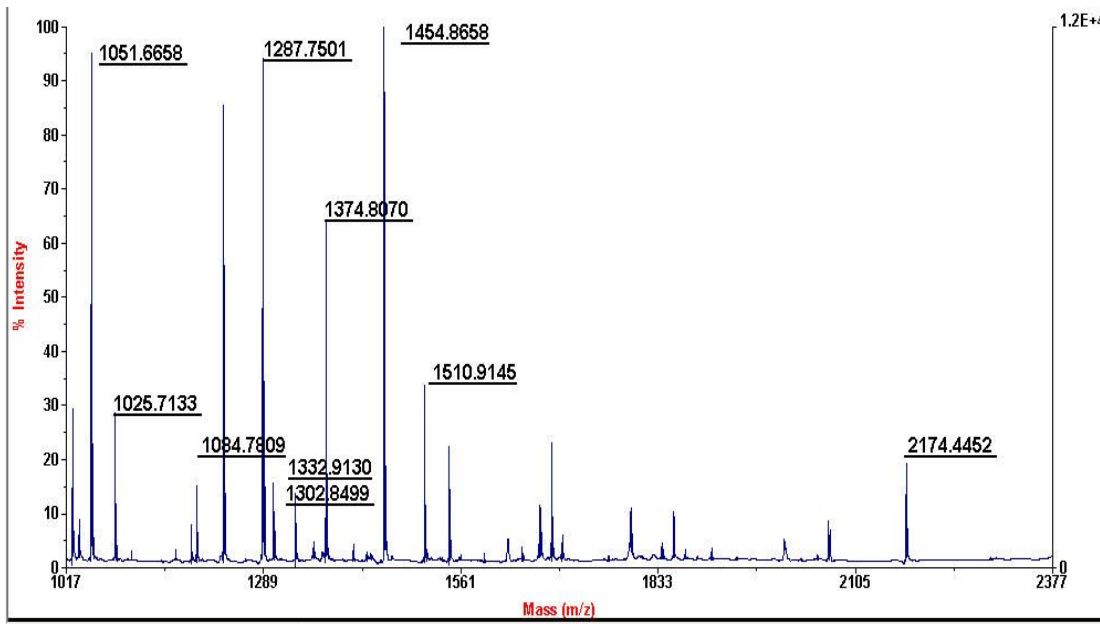

| Start - End | Observed  | Mr(expt)  | Mr(calc)  | Delta  | Miss Sequence             |
|-------------|-----------|-----------|-----------|--------|---------------------------|
| 24 - 34     | 1454.8658 | 1453.8585 | 1453.7275 | 0.1310 | 0 R.EEIVYLPCIYR.N         |
| 53 - 62     | 1287.7501 | 1286.7429 | 1286.6190 | 0.1239 | 0 K.SPQYCQVIHR.L          |
| 94 - 103    | 1084.7809 | 1083.7736 | 1083.6652 | 0.1084 | 0 K.LVLPLSISSR.I          |
| 161 - 174   | 1510.9145 | 1509.9073 | 1509.7715 | 0.1357 | 0 K.GGFVLLDGETFEVK.G      |
| 236 - 254   | 2174.4452 | 2173.4379 | 2173.2470 | 0.1909 | 1 R.HEIVQTLSLKDGLIPLEIR.F |
| 246 - 254   | 1025.7133 | 1024.7061 | 1024.5917 | 0.1144 | 0 K.DGLIPLEIR.F           |
| 334 - 344   | 1374.8070 | 1373.7997 | 1373.6688 | 0.1310 | 0 R.QYDISDPQRPR.L         |
| 345 - 357   | 1332.9130 | 1331.9057 | 1331.7813 | 0.1244 | 0 R.LTGQLFLGGSIVK.G       |
| 412 - 419   | 1051.6658 | 1050.6586 | 1050.5498 | 0.1087 | 0 K.QFYPLDIR.E            |
| 449 - 460   | 1302.8499 | 1301.8427 | 1301.7092 | 0.1335 | 0 K.EPLGPALAHCLR.Y        |

No match to: 1024.6773, 1233.7809, 1544.8767, 1794.1485, 2389.3680, 2459.2942, 2547.6053

305 T-complex protein 1 subunit beta (TCP-1-beta) (CCT-beta) - Homo sapiens (Human)

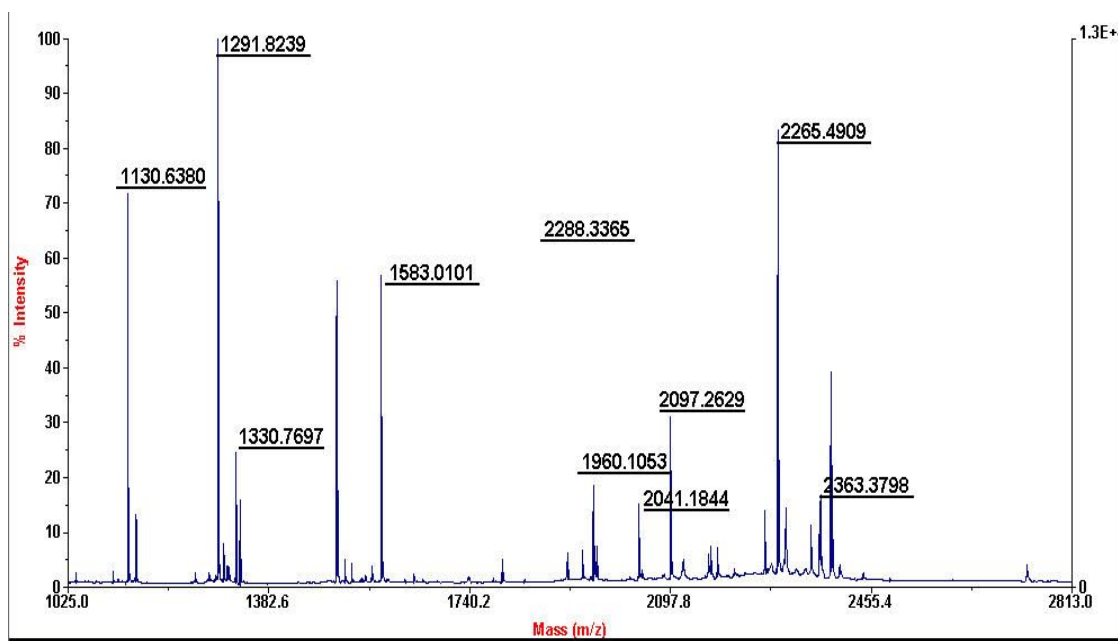

| Start - End   | Observed  | Mr(expt)  | Mr(calc)  | Delta  | Miss Sequence                |
|---------------|-----------|-----------|-----------|--------|------------------------------|
| 90 - 111      | 2288.3365 | 2287.3292 | 2287.1544 | 0.1748 | 0 R.VQDDEVGDGTTSVTVLAAELLR.E |
| 121 - 131     | 1291.8239 | 1290.8167 | 1290.7197 | 0.0970 | 0 K.IHPQTIAGWR.E             |
| 139 - 156     | 1960.1053 | 1959.0980 | 1958.9698 | 0.1283 | 1 R.EALLSSAVDHGSDEVKFR.Q     |
| 205 - 223     | 2041.1844 | 2040.1771 | 2040.0415 | 0.1356 | 1 K.LGGSLADSYLDEGFLLDKK.I    |
| 285 - 293     | 1130.6380 | 1129.6307 | 1129.5451 | 0.0856 | 0 K.HGINCFINR.Q              |
| 323 - 342     | 2097.2629 | 2096.2556 | 2096.1154 | 0.1402 | 0 R.LALVTGGEIASTFDHPELVK.L   |
| 377 - 388     | 1330.7697 | 1329.7625 | 1329.6524 | 0.1100 | 0 R.GATQQILDEAER.S           |
| 445 - 466     | 2363.3798 | 2362.3725 | 2362.1838 | 0.1887 | 0 R.MLPTIADNAGYDSADLVAQLR.A  |
| Oxidation (M) |           |           |           |        |                              |
| 502 - 516     | 1583.0101 | 1582.0028 | 1581.9090 | 0.0938 | 0 R.QVLLSAAEAAEVILR.V        |
| 502 - 522     | 2265.4909 | 2264.4836 | 2264.3103 | 0.1733 | 1 R.QVLLSAAEAAEVILRVDNIIK.A  |

No match to: 1323.8287, 1502.8708, 2302.2760, 2383.2739

306 Succinyl-CoA:3-ketoacid-coenzyme A transferase 1

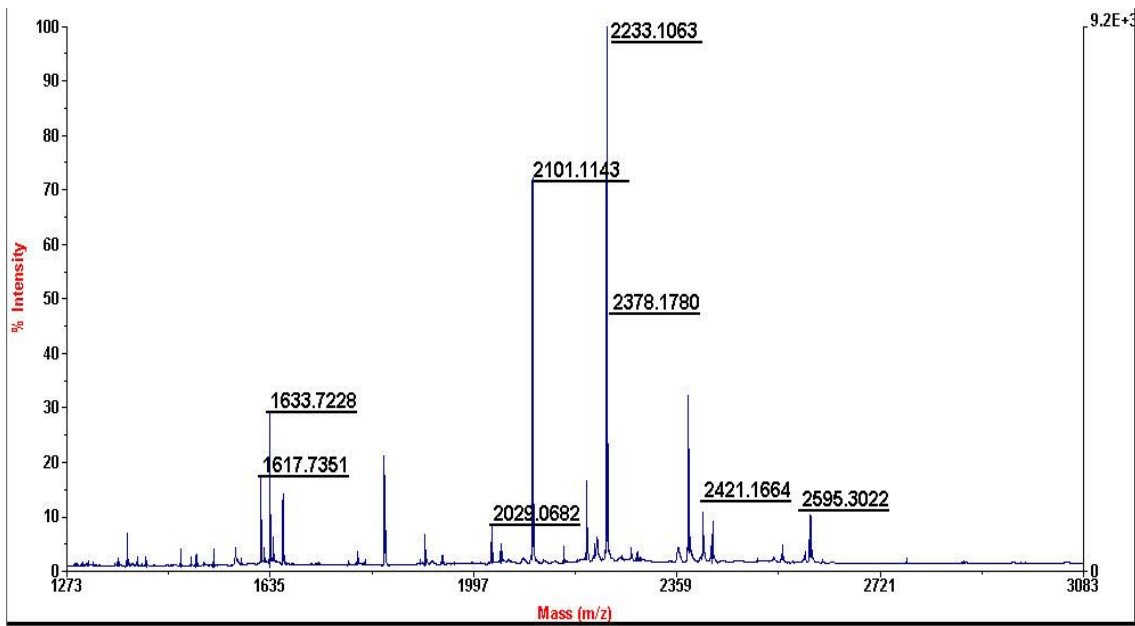

| Start - End                          | Observed  | Mr(expt)  | Mr(calc)  | Delta   | Miss Sequence                  |
|--------------------------------------|-----------|-----------|-----------|---------|--------------------------------|
| 84 - 104                             | 2101.1143 | 2100.1071 | 2100.1328 | -0.0257 | 0 K.GLTAVSNNAGVDNFGLGLLLR.S    |
| 111 - 124                            | 1617.7351 | 1616.7278 | 1616.7141 | 0.0138  | 0 R.MVSSYVGENAEFER.Q           |
| 111 - 124                            | 1633.7228 | 1632.7156 | 1632.7090 | 0.0066  | 0 R.MVSSYVGENAEFER.Q Oxidation |
| (M)                                  |           |           |           |         |                                |
| 125 - 144                            | 2233.1063 | 2232.0991 | 2232.1274 | -0.0283 | 0 R.QYLSGELEVELTPQGTLAERI.I    |
| 147 - 173                            | 2595.3022 | 2594.2949 | 2594.3017 | -0.0068 | 0                              |
| R.AGGAGVPAFYTPTGYGTLVQEGGSPK.Y       |           |           |           |         |                                |
| 191 - 211                            | 2378.1780 | 2377.1707 | 2377.1954 | -0.0247 | 0 R.EFNGQHFILEEAITGDFALVK.A    |
| 237 - 268                            | 3560.8074 | 3559.8001 | 3559.8199 | -0.0197 | 0                              |
| K.AAETTVVEVEEIVDIGAFAPEDIHIPQIYVHR.L |           |           |           |         |                                |
| 369 - 390                            | 2421.1664 | 2420.1592 | 2420.1570 | 0.0022  | 0 K.ETVTILPGASFFSSDESFAMIR.G   |
| Oxidation (M)                        |           |           |           |         |                                |
| 483 - 500                            | 2029.0682 | 2028.0609 | 2028.0779 | -0.0170 | 0 K.GLTLIELWEGLTVDDVQK.S       |

No match to: 1656.8658, 1838.0517, 2198.1634

307

Apolipoprotein A-I precursor



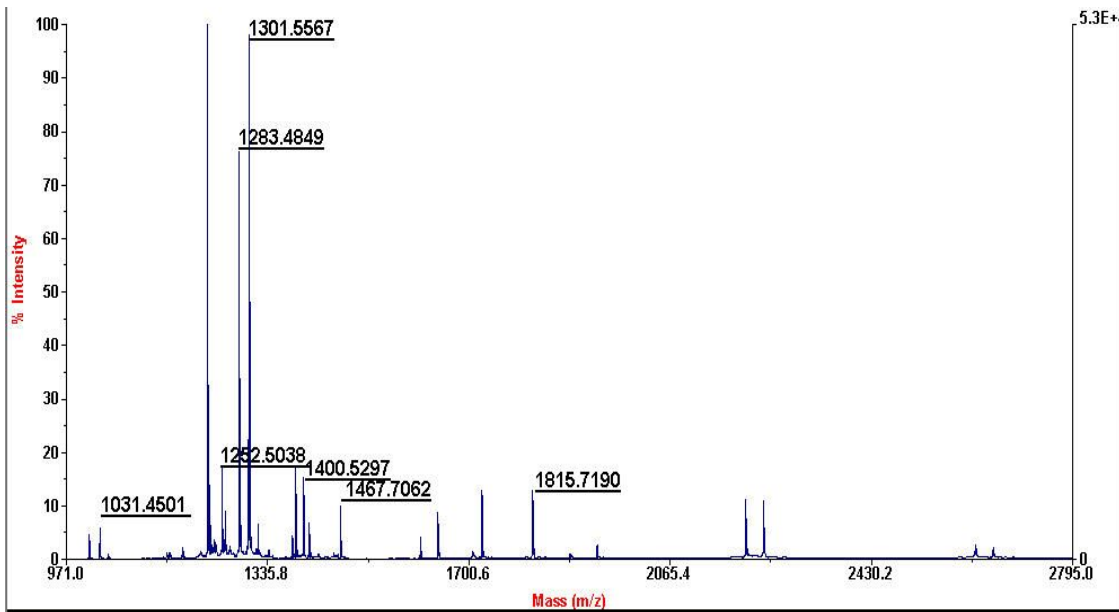

| Start - End | Observed  | Mr(expt)  | Mr(calc)  | Delta   | Miss Sequence           |
|-------------|-----------|-----------|-----------|---------|-------------------------|
| 48 - 64     | 1815.7190 | 1814.7117 | 1814.8435 | -0.1318 | 1 K.DSGRDYVSQFEGSALGK.Q |
| 52 - 64     | 1400.5297 | 1399.5225 | 1399.6620 | -0.1395 | 0 R.DYVSQFEGSALGK.Q     |
| 121 - 130   | 1252.5038 | 1251.4965 | 1251.6136 | -0.1170 | 0 K.VQPYLDDFQK.K        |
| 132 - 140   | 1283.4849 | 1282.4776 | 1282.5652 | -0.0875 | 0 K.WQEEMELYR.Q         |
| 143 - 155   | 1467.7062 | 1466.6990 | 1466.7841 | -0.0851 | 1 K.VEPLRAELQEGAR.Q     |
| 165 - 173   | 1031.4501 | 1030.4429 | 1030.5117 | -0.0688 | 0 K.LSPLGEEMR.D         |
| 185 - 195   | 1301.5567 | 1300.5494 | 1300.6411 | -0.0917 | 0 R.THLAPYSDEL.R        |

No match to: 1226.4522, 1644.6477, 1723.8209, 1823.7850, 2170.8224

308 Apolipoprotein A-I precursor

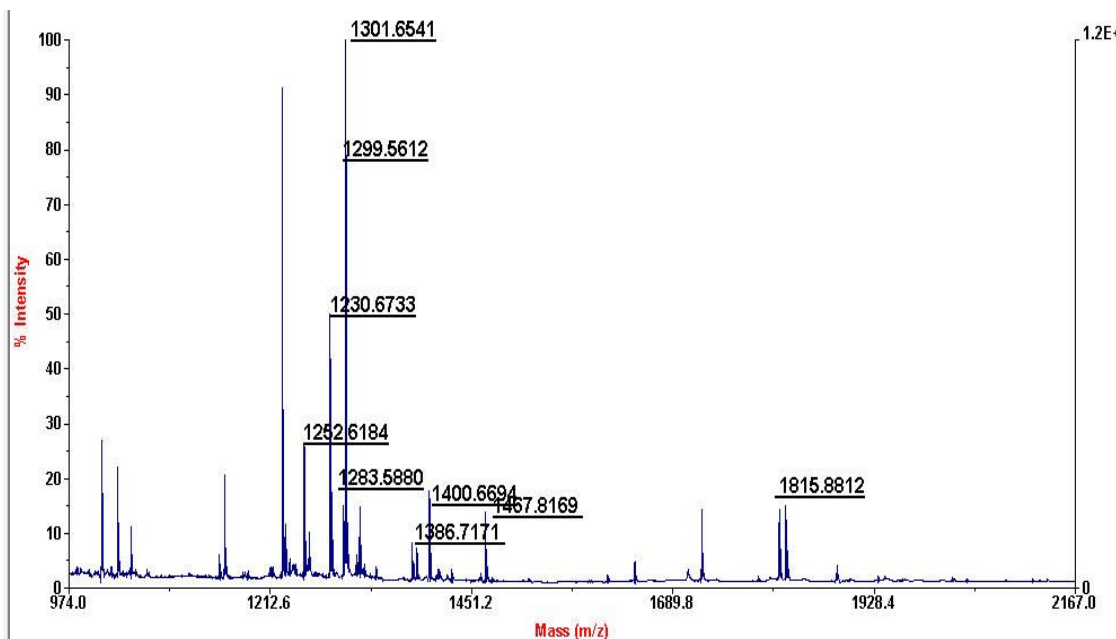

| Start - End | Observed  | Mr(expt)  | Mr(calc)  | Delta   | Miss Sequence                 |
|-------------|-----------|-----------|-----------|---------|-------------------------------|
| 48 - 64     | 1815.8812 | 1814.8739 | 1814.8435 | 0.0304  | 1 K.DSGRDYVSQFEGSALGK.Q       |
| 52 - 64     | 1400.6694 | 1399.6621 | 1399.6620 | 0.0002  | 0 R.DYVSQFEGSALGK.Q           |
| 84 - 101    | 2202.1559 | 2201.1486 | 2201.1117 | 0.0369  | 1 K.LREQQLGPVTQEFWDNLEK.E     |
| 121 - 130   | 1252.6184 | 1251.6111 | 1251.6136 | -0.0025 | 0 K.VQPYLDDFQK.K              |
| 132 - 140   | 1283.5880 | 1282.5807 | 1282.5652 | 0.0155  | 0 K.WQEEMELYR.Q               |
| 132 - 140   | 1299.5612 | 1298.5539 | 1298.5601 | -0.0062 | 0 K.WQEEMELYR.Q Oxidation (M) |
| 143 - 155   | 1467.8169 | 1466.8096 | 1466.7841 | 0.0255  | 1 K.VEPLRAELQEGAR.Q           |
| 185 - 195   | 1301.6541 | 1300.6468 | 1300.6411 | 0.0057  | 0 R.THLAPYSDEL.R.Q            |
| 240 - 250   | 1230.6733 | 1229.6661 | 1229.7020 | -0.0359 | 0 R.QGLLPVLESFK.V             |
| 251 - 262   | 1386.7171 | 1385.7098 | 1385.7078 | 0.0020  | 0 K.VSFLSALEEYTK.K            |

No match to: 1226.5516, 1644.7983, 1723.9666, 2234.1630

### 309 Inosine triphosphate pyrophosphatase

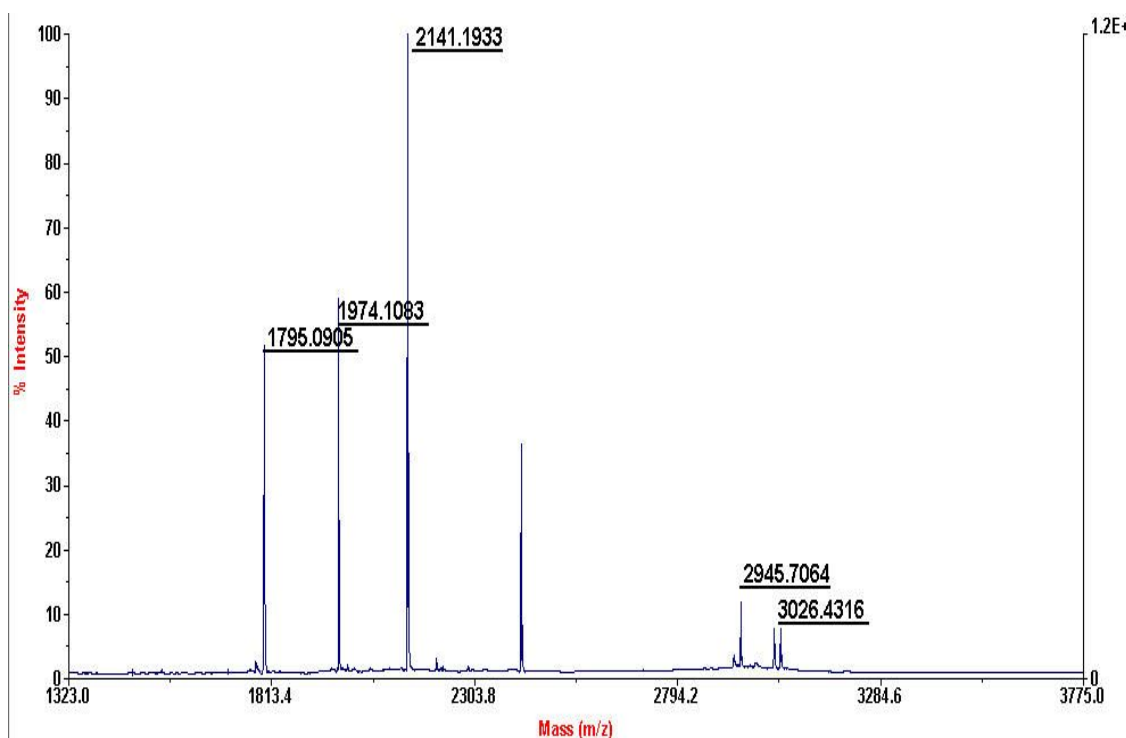

| Start - End | Observed  | Mr(expt)  | Mr(calc)  | Delta  | Miss Sequence            |
|-------------|-----------|-----------|-----------|--------|--------------------------|
| 40 - 56     | 1974.1083 | 1973.1011 | 1972.9629 | 0.1381 | 0 K.IDLPEYQGEPEDEISIQK.C |

|                                   |           |           |           |        |   |                          |
|-----------------------------------|-----------|-----------|-----------|--------|---|--------------------------|
| 63 - 89                           | 2945.7064 | 2944.6991 | 2944.4827 | 0.2164 | 0 |                          |
| R.QVQGPVLVEDTCLCFNALGGLPGPYIK.W 2 |           |           |           |        |   |                          |
| 95 - 110                          | 1795.0905 | 1794.0832 | 1793.9676 | 0.1157 | 0 | K.LKPEGLHQLLAGFEDK.S     |
| 111 - 130                         | 2141.1933 | 2140.1860 | 2140.0259 | 0.1601 | 0 | K.SAYALCTFALSTGDPSQPVR.L |
| 145 - 169                         | 3026.4316 | 3025.4243 | 3025.1994 | 0.2250 | 0 |                          |
| R.GCQDFGWDPCFQPDGYEQTYAEMP.K.A 2  |           |           |           |        |   |                          |

No match to: 1941.6862, 2415.5070

### 310 Protein-glutamine gamma-glutamyltransferase 2

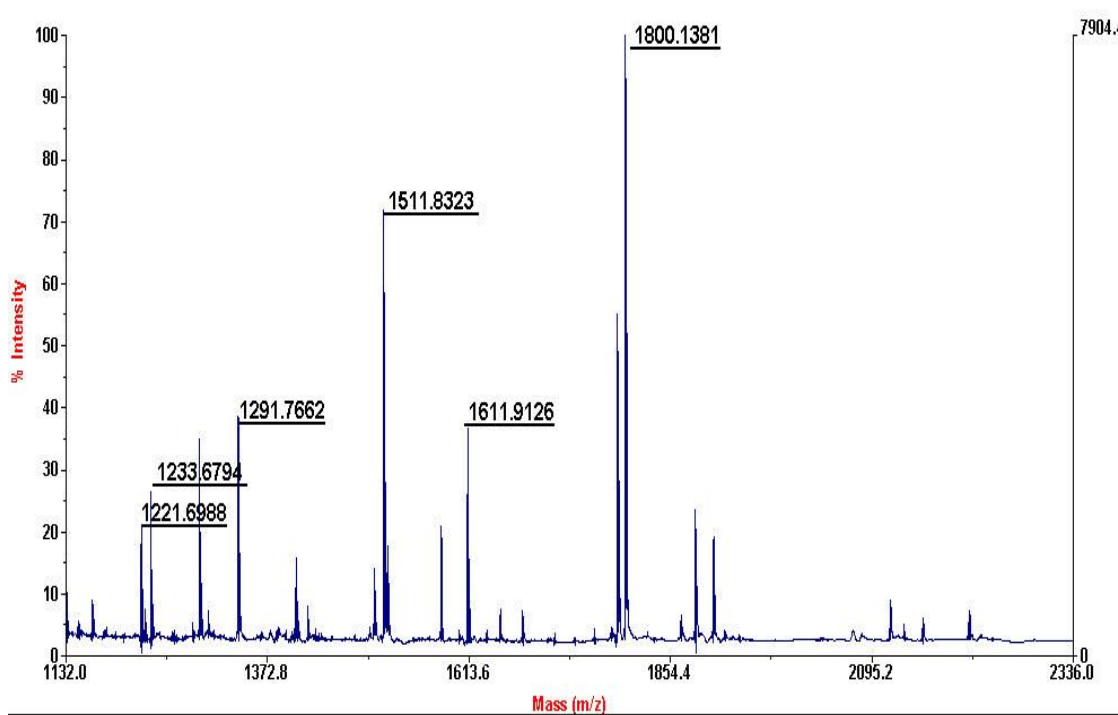

| Start - End | Observed  | Mr(expt)  | Mr(calc)  | Delta  | Miss Sequence          |
|-------------|-----------|-----------|-----------|--------|------------------------|
| 541 - 550   | 1221.6988 | 1220.6915 | 1220.6475 | 0.0440 | 0 K.SVPLCILYEK.Y       |
| 551 - 562   | 1511.8323 | 1510.8250 | 1510.7449 | 0.0801 | 1 K.YRDCLTESNLIK.V     |
| 565 - 580   | 1800.1381 | 1799.1308 | 1799.0192 | 0.1116 | 0 R.ALLVEPVINSYLLAER.D |
| 581 - 590   | 1233.6794 | 1232.6721 | 1232.6288 | 0.0433 | 0 R.DLYLENPEIK.I       |
| 635 - 649   | 1611.9126 | 1610.9053 | 1610.8039 | 0.1014 | 0 K.TVEIPDPVEAGEEVK.V  |
| 664 - 674   | 1291.7662 | 1290.7589 | 1290.7183 | 0.0406 | 1 K.LVVNFESDKLK.A      |

No match to: 1337.8052, 1500.7771, 1516.8400, 1790.9977, 1884.0707

311 Protein DJ-1

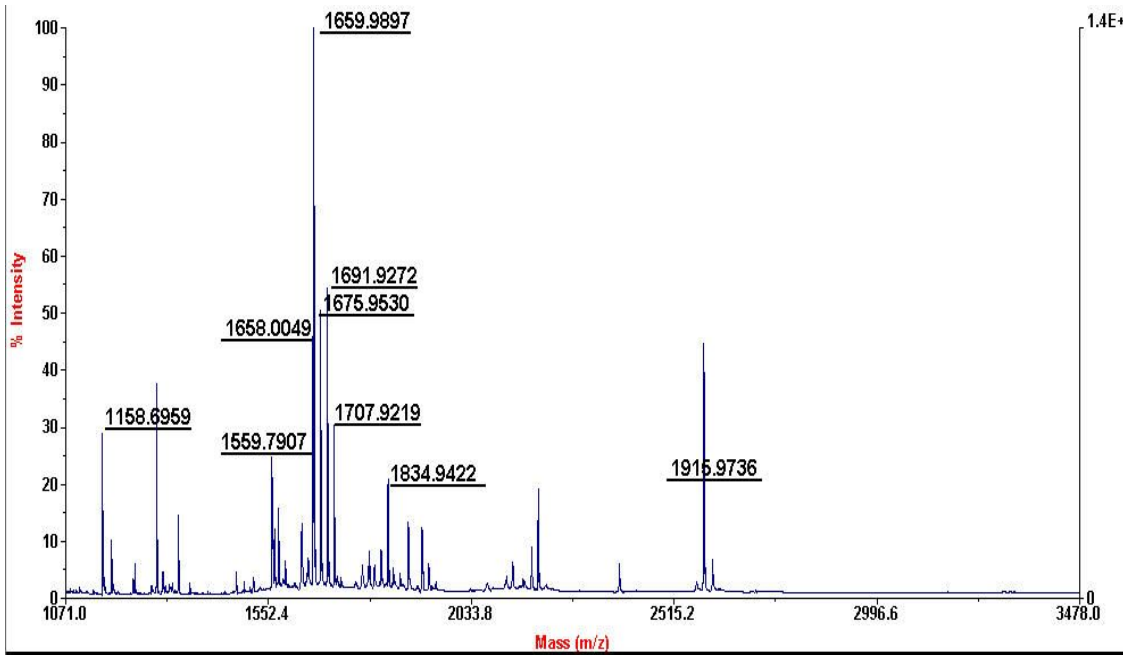

| Start - End   | Observed  | Mr(expt)  | Mr(calc)  | Delta  | Miss Sequence                   |
|---------------|-----------|-----------|-----------|--------|---------------------------------|
| 13 - 27       | 1675.9530 | 1674.9457 | 1674.7957 | 0.1500 | 0 K.GAEEMETVIPVDVMR.R           |
| 13 - 27       | 1691.9272 | 1690.9199 | 1690.7906 | 0.1293 | 0 K.GAEEMETVIPVDVMR.R Oxidation |
| (M)           |           |           |           |        |                                 |
| 13 - 27       | 1707.9219 | 1706.9146 | 1706.7855 | 0.1291 | 0 K.GAEEMETVIPVDVMR.R 2         |
| Oxidation (M) |           |           |           |        |                                 |
| 33 - 48       | 1658.0049 | 1656.9976 | 1656.8618 | 0.1358 | 1 K.VTVAGLAGKDPVQCSR.D          |
| 49 - 63       | 1659.9897 | 1658.9824 | 1658.8185 | 0.1639 | 1 R.DVVICPDASLEDAKK.E           |
| 90 - 98       | 1158.6959 | 1157.6886 | 1157.6040 | 0.0846 | 1 K.EILKEQENR.K                 |
| 131 - 145     | 1834.9422 | 1833.9349 | 1833.7410 | 0.1939 | 1 K.DKMMNGGHYTYSEN.R.V 2        |
| Oxidation (M) |           |           |           |        |                                 |
| 133 - 145     | 1559.7907 | 1558.7834 | 1558.6293 | 0.1541 | 0 K.MMNGGHYTYSEN.R.V            |
| 133 - 148     | 1915.9736 | 1914.9663 | 1914.8352 | 0.1311 | 1 K.MMNGGHYTYSEN.RVEK.D         |

No match to: 1286.7776, 1337.8561, 1560.7556, 1631.1474, 1690.8460, 1835.8773, 1884.1276, 2071.8029, 2192.1176, 2584.5565

312 Heme-binding protein 1

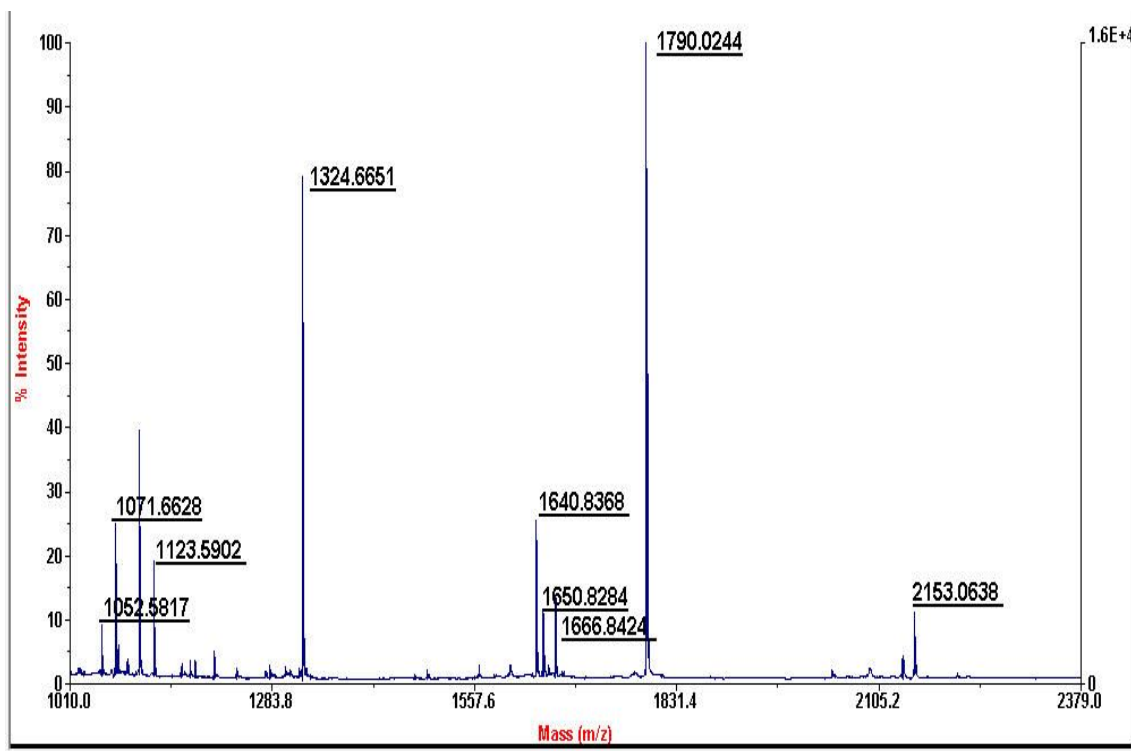

| Start - End   | Observed  | Mr(expt)  | Mr(calc)  | Delta  | Miss Sequence                   |
|---------------|-----------|-----------|-----------|--------|---------------------------------|
| 24 - 34       | 1324.6651 | 1323.6578 | 1323.5942 | 0.0636 | 1 K.GDKKEEVAYEER.A              |
| 41 - 56       | 1790.0244 | 1789.0171 | 1788.9258 | 0.0914 | 0 K.FATVEVTDKPVDEALR.E          |
| 62 - 72       | 1123.5902 | 1122.5829 | 1122.5669 | 0.0160 | 1 K.VAKYAGGTNDK.G               |
| 104 - 118     | 1640.8368 | 1639.8295 | 1639.7842 | 0.0453 | 0 R.IPNQFQSDPPAPSDK.S           |
| 126 - 140     | 1650.8284 | 1649.8211 | 1649.7759 | 0.0451 | 0 R.EGITVYSMQFGGYAK.E           |
| 126 - 140     | 1666.8424 | 1665.8351 | 1665.7709 | 0.0642 | 0 R.EGITVYSMQFGGYAK.E Oxidation |
| (M)           |           |           |           |        |                                 |
| 153 - 162     | 1052.5817 | 1051.5744 | 1051.5298 | 0.0446 | 0 R.AALEGTATYR.G                |
| 163 - 180     | 2153.0638 | 2152.0566 | 2151.9394 | 0.1172 | 0 R.GDIYFCTGYDPPMKPYGR.R ;      |
| Oxidation (M) |           |           |           |        |                                 |
| 181 - 188     | 1071.6628 | 1070.6556 | 1070.6236 | 0.0319 | 1 R.RNEIWLLK.T                  |

No match to: 988.4994, 1103.6719, 1204.7390, 1649.8310, 2093.6726

313 Peroxiredoxin-2

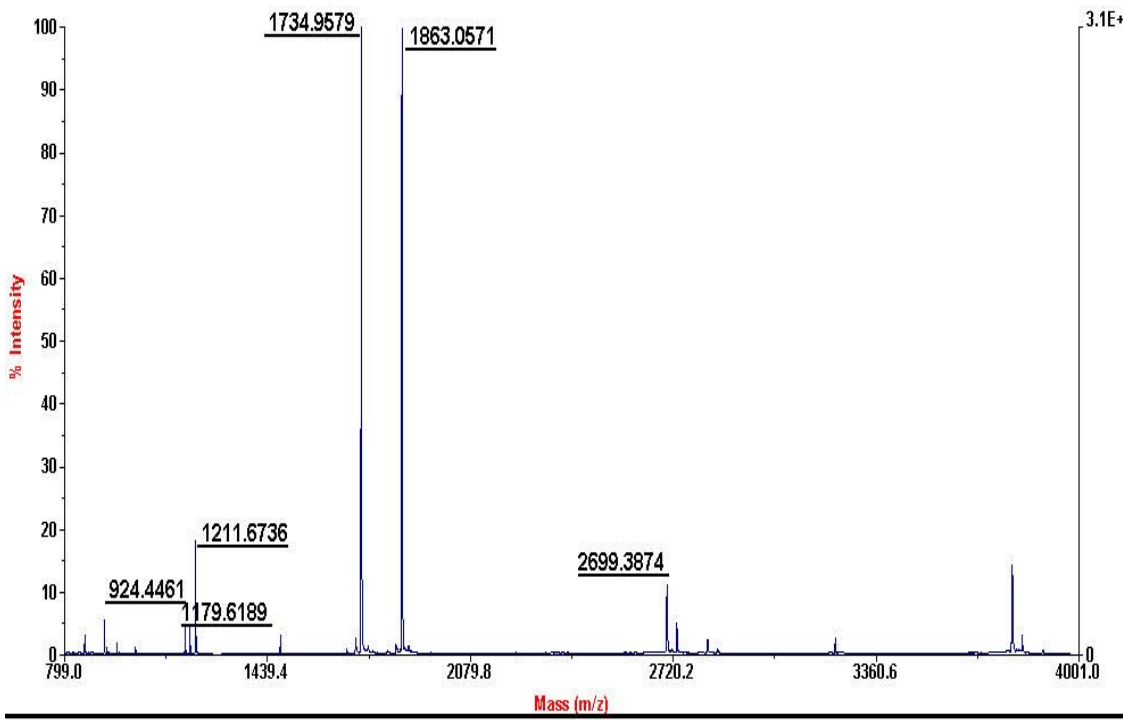

| Start - End | Observed | Mr(expt) | Mr(calc) | Delta | Miss Sequence |
|-------------|----------|----------|----------|-------|---------------|
|-------------|----------|----------|----------|-------|---------------|

|         |           |           |           |        |   |
|---------|-----------|-----------|-----------|--------|---|
| 68 - 91 | 2699.3874 | 2698.3801 | 2698.3537 | 0.0263 | 0 |
|---------|-----------|-----------|-----------|--------|---|

**K.LGCEVLGVSVDSQFTHLAWINTPR.K**

|           |           |           |           |         |                          |
|-----------|-----------|-----------|-----------|---------|--------------------------|
| 92 - 109  | 1863.0571 | 1862.0498 | 1862.0625 | -0.0127 | 1 R.KEGGLGPLNIPLLADVTR.R |
| 93 - 109  | 1734.9579 | 1733.9506 | 1733.9676 | -0.0169 | 0 K.EGGLGPLNIPLLADVTR.R  |
| 110 - 119 | 1179.6189 | 1178.6116 | 1178.6295 | -0.0179 | 1 R.RLSEYGVLK.T          |
| 120 - 127 | 924.4461  | 923.4388  | 923.4348  | 0.0040  | 0 K.TDEGIAYR.G           |
| 140 - 150 | 1211.6736 | 1210.6663 | 1210.6670 | -0.0007 | 0 R.QITVNDLPVGR.S        |

No match to: 1194.6230, 2731.3888

314 Glutathione S-transferase P

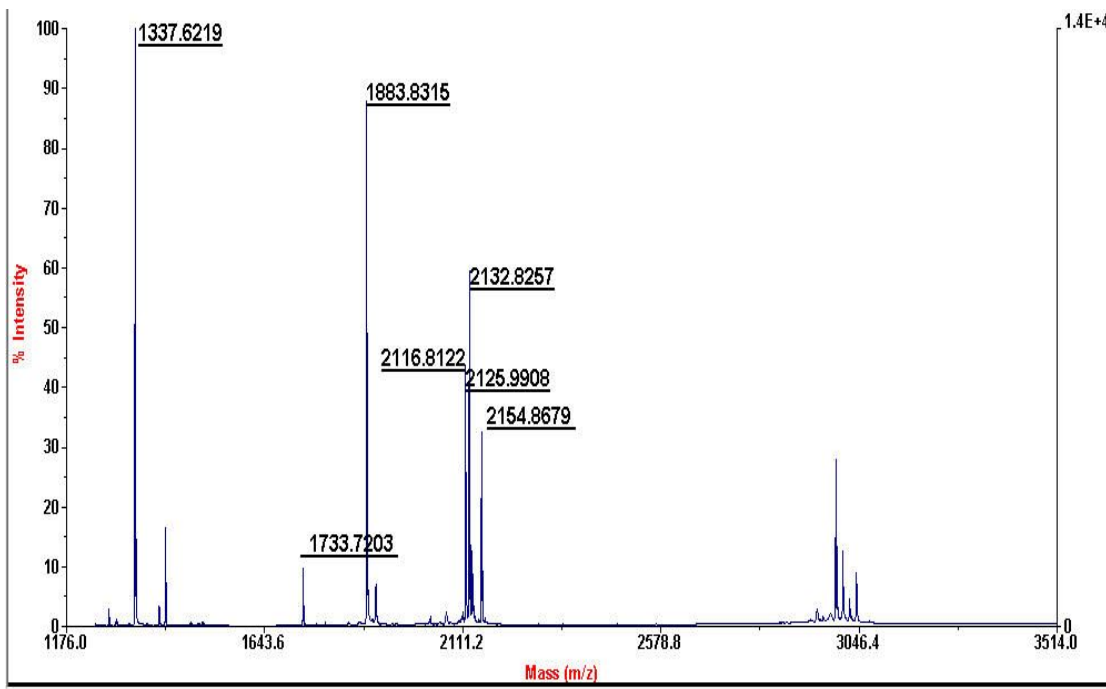

| Start - End   | Observed  | Mr(expt)  | Mr(calc)  | Delta   | Miss Sequence             |
|---------------|-----------|-----------|-----------|---------|---------------------------|
| 2 - 12        | 1337.6219 | 1336.6146 | 1336.7180 | -0.1034 | 0 M.PPYTVVYFPVR.G         |
| 31 - 45       | 1733.7203 | 1732.7130 | 1732.8519 | -0.1389 | 0 K.EEVTVVETWQEGSLK.A     |
| 56 - 71       | 1883.8315 | 1882.8242 | 1882.9425 | -0.1183 | 0 K.FQDGDLTLYQSNTILR.H    |
| 83 - 101      | 2116.8122 | 2115.8049 | 2115.9743 | -0.1693 | 0 K.DQQEALVDMVNDGVEDLR.C  |
| 83 - 101      | 2132.8257 | 2131.8185 | 2131.9692 | -0.1507 | 0 K.DQQEALVDMVNDGVEDLR.C  |
| Oxidation (M) |           |           |           |         |                           |
| 104 - 121     | 2154.8679 | 2153.8606 | 2154.0521 | -0.1914 | 1 K.YISLIYTNYEAGKDDYVK.A  |
| 122 - 141     | 2125.9908 | 2124.9835 | 2125.1531 | -0.1697 | 0 K.ALPGQLKPFETLLSQNGGK.T |

No match to: 1408.6463, 1904.8148, 2948.1962, 2991.2528

315 Annexin A2

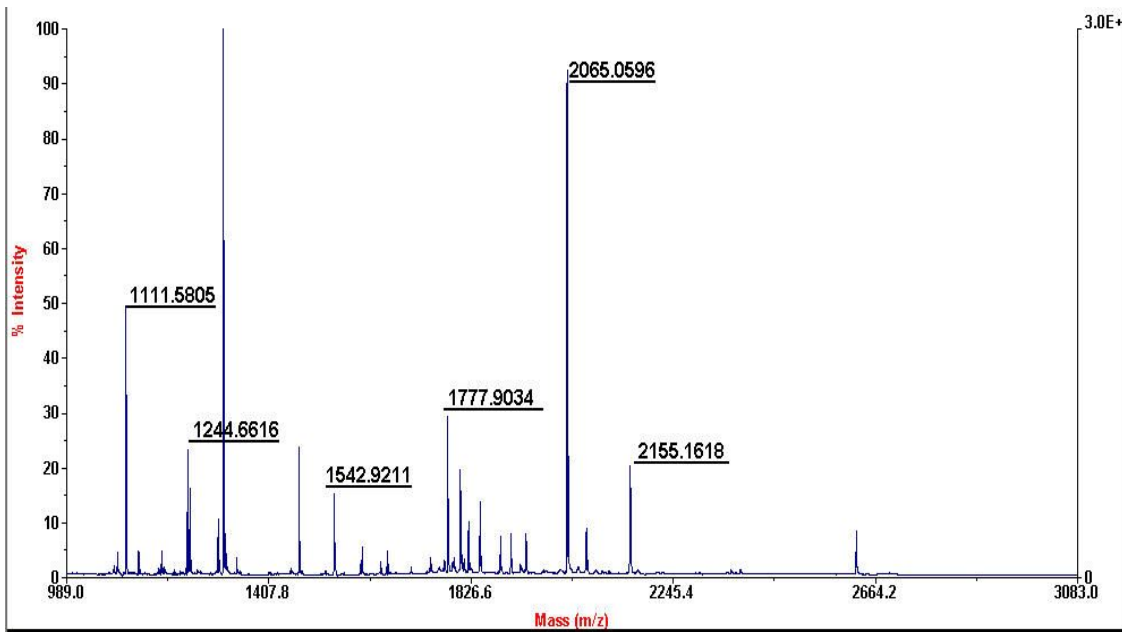

| Start - End | Observed  | Mr(expt)  | Mr(calc)  | Delta  | Miss Sequence             |
|-------------|-----------|-----------|-----------|--------|---------------------------|
| 29 - 47     | 2155.1618 | 2154.1545 | 2154.0593 | 0.0952 | 1 K.AYTNFDAERDALNIETAIK.T |
| 50 - 63     | 1542.9211 | 1541.9138 | 1541.8413 | 0.0725 | 0 K.GVDEVTIVNILTNR.S      |
| 69 - 77     | 1111.5805 | 1110.5733 | 1110.5458 | 0.0275 | 0 R.QDIAFAYQR.R           |
| 120 - 135   | 1777.9034 | 1776.8962 | 1776.8564 | 0.0398 | 0 K.GLGTDEDSLIEICSR.T     |
| 136 - 145   | 1244.6616 | 1243.6543 | 1243.6156 | 0.0387 | 0 R.TNQELQEINR.V          |
| 179 - 196   | 2065.0596 | 2064.0523 | 2063.9760 | 0.0763 | 1 R.RAEDGSVIDYELIDQDAR.D  |

No match to: 1239.6332, 1302.6840, 1313.7809, 1469.8793, 1804.9165, 1820.9023, 1887.0702, 2025.1821, 2623.3790

316 Heat-shock protein beta-1

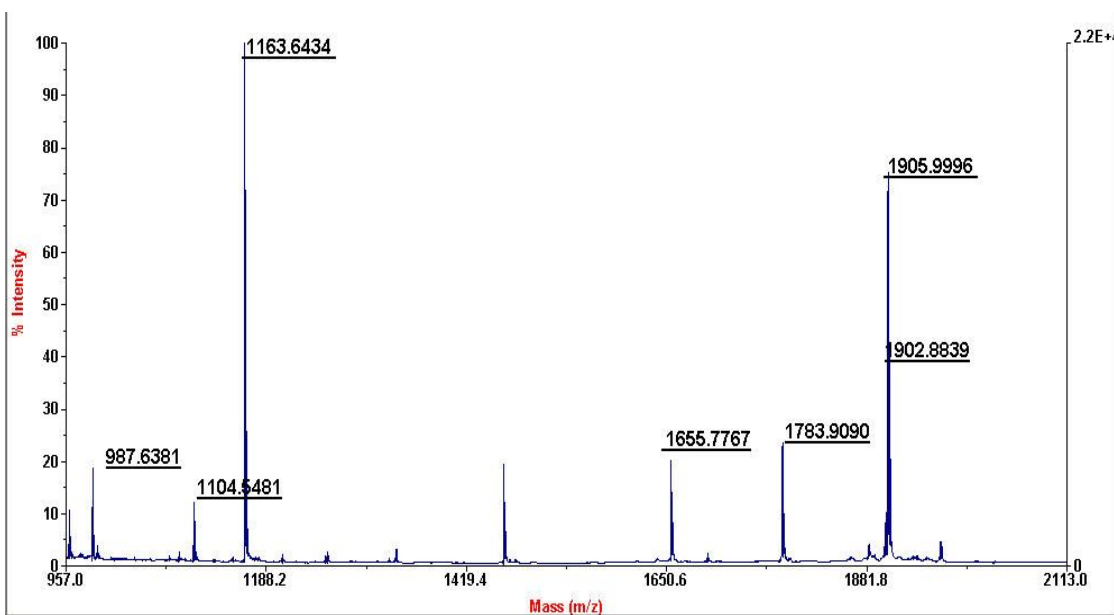

| Start - End | Observed | Mr(expt) | Mr(calc) | Delta | Miss Sequence |
|-------------|----------|----------|----------|-------|---------------|
|-------------|----------|----------|----------|-------|---------------|



|           |           |           |           |         |   |                       |
|-----------|-----------|-----------|-----------|---------|---|-----------------------|
| 5 - 12    | 987.6381  | 986.6309  | 986.6025  | 0.0283  | 1 | R.RVPFSLLR.G          |
| 13 - 27   | 1902.8839 | 1901.8766 | 1901.8598 | 0.0168  | 1 | R.GPSWDPFRDWYPHSR.L   |
| 21 - 27   | 960.4469  | 959.4396  | 959.4250  | 0.0146  | 0 | R.DWYPHSR.L           |
| 28 - 37   | 1163.6434 | 1162.6361 | 1162.6135 | 0.0226  | 0 | R.LFDQAFGLPR.L        |
| 97 - 112  | 1783.9090 | 1782.9018 | 1782.9152 | -0.0135 | 0 | R.VSLDVNHFAPDELTVK.T  |
| 124 - 136 | 1655.7767 | 1654.7694 | 1654.7448 | 0.0247  | 1 | K.HEERQDEHGYISR.C     |
| 128 - 136 | 1104.5481 | 1103.5409 | 1103.4996 | 0.0413  | 0 | R.QDEHGYISR.C         |
| 172 - 188 | 1905.9996 | 1904.9923 | 1904.9843 | 0.0079  | 0 | K.LATQSNEITIPVTFESR.A |

No match to: 1462.8064

317 Growth factor receptor-bound protein 2

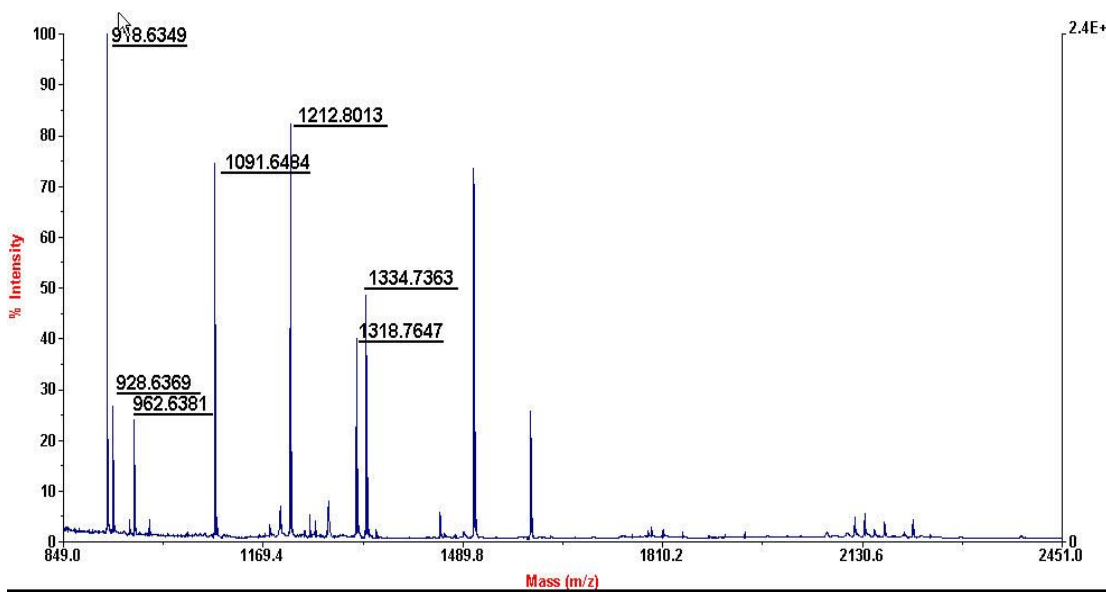

| Start - End | Observed  | Mr(expt)  | Mr(calc)  | Delta  | Miss Sequence                      |
|-------------|-----------|-----------|-----------|--------|------------------------------------|
| 70 - 78     | 1091.6484 | 1090.6411 | 1090.5441 | 0.0971 | 1 K.AEEMLSKQR.H                    |
| 77 - 86     | 1212.8013 | 1211.7940 | 1211.6523 | 0.1417 | 1 K.QRHDGAFLIR.E                   |
| 79 - 86     | 928.6369  | 927.6296  | 927.4926  | 0.1370 | 0 R.HDGAFLIR.E                     |
| 143 - 149   | 918.6349  | 917.6277  | 917.5083  | 0.1194 | 0 R.NQQIFLR.D                      |
| 196 - 207   | 1318.7647 | 1317.7574 | 1317.5707 | 0.1867 | 0 K.GACHGQTGMFPR.N                 |
| 196 - 207   | 1334.7363 | 1333.7290 | 1333.5656 | 0.1634 | 0 K.GACHGQTGMFPR.N ; Oxidation (M) |
| 208 - 215   | 962.6381  | 961.6308  | 961.4981  | 0.1327 | 0 R.NYVTPVNR.N                     |

No match to: 1195.7212, 1274.2056, 1452.8927, 1506.9538, 1597.9155, 2211.3992

318 CRSP complex subunit 6

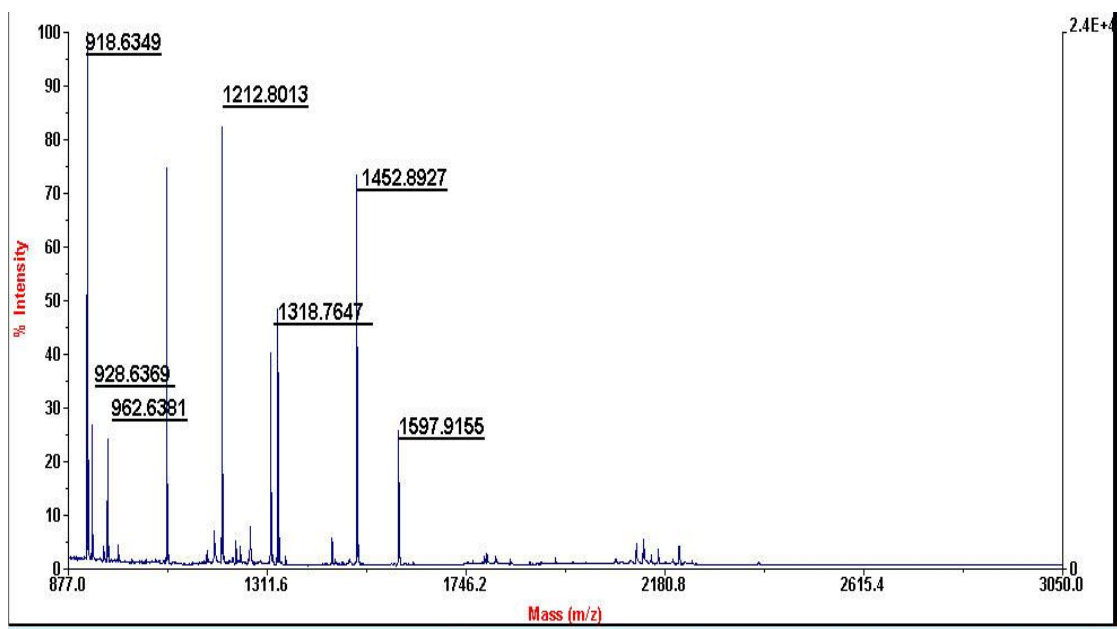

| Start - End | Observed  | Mr(expt)  | Mr(calc)  | Delta  | Miss Sequence                       |
|-------------|-----------|-----------|-----------|--------|-------------------------------------|
| 151 - 162   | 1212.8013 | 1211.7940 | 1211.7601 | 0.0339 | 1 K.KSLAGAAQILLK.G                  |
| 407 - 415   | 962.6381  | 961.6308  | 961.4869  | 0.1439 | 0 R.LSGPQAFDK.N                     |
| 437 - 443   | 928.6369  | 927.6296  | 927.5403  | 0.0893 | 1 K.HIFLRSR.A                       |
| 442 - 454   | 1318.7647 | 1317.7574 | 1317.7000 | 0.0574 | 1 R.SRAAATIDSLASR.I                 |
| 607 - 614   | 918.6349  | 917.6277  | 917.4454  | 0.1822 | 0 K.SDVLQDNK.W                      |
| 607 - 619   | 1597.9155 | 1596.9082 | 1596.8008 | 0.1074 | 1 K.SDVLQDNKWSHLR.G                 |
| 639 - 651   | 1452.8927 | 1451.8854 | 1451.7074 | 0.1780 | 0 K.MELLMSALSPCLL.- 2 Oxidation (M) |

No match to: 1091.6484, 1195.7212, 1274.2056, 1334.7363, 1506.9538, 2211.3992

319 Heat-shock protein beta-1

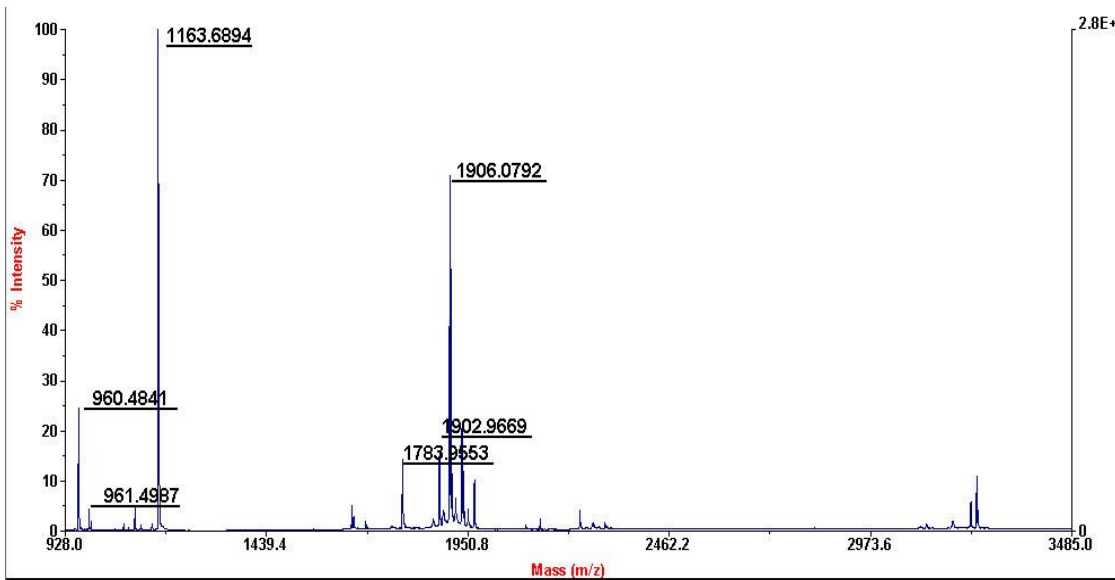

| Start - End | Observed  | Mr(expt)  | Mr(calc)  | Delta  | Miss Sequence            |
|-------------|-----------|-----------|-----------|--------|--------------------------|
| 13 - 20     | 961.4987  | 960.4914  | 960.4454  | 0.0461 | 0 R.GPSWDPF.R.D          |
| 13 - 27     | 1902.9669 | 1901.9596 | 1901.8598 | 0.0998 | 1 R.GPSWDPF.RD.WYPHS.R.L |
| 21 - 27     | 960.4841  | 959.4768  | 959.4250  | 0.0518 | 0 R.DWYPHS.R.L           |
| 28 - 37     | 1163.6894 | 1162.6821 | 1162.6135 | 0.0686 | 0 R.LFDQAFGLP.R.L        |
| 97 - 112    | 1783.9553 | 1782.9480 | 1782.9152 | 0.0328 | 0 R.VSLDV.NHFAPDELTVK.T  |
| 172 - 188   | 1906.0792 | 1905.0719 | 1904.9843 | 0.0876 | 0 K.LATQSNEITIPVTFES.R.A |

No match to: 1165.6920, 1878.0678, 1934.8966, 1938.8909, 1966.8783

### 320 Proteasome subunit beta type 3

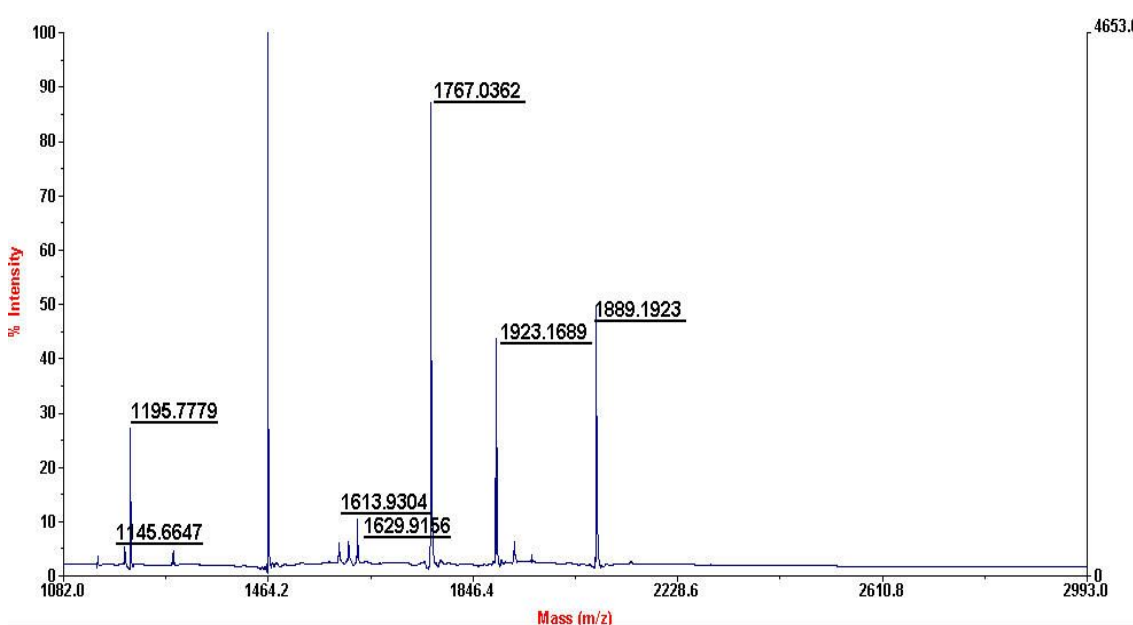

| Start - End | Observed  | Mr(expt)  | Mr(calc)  | Delta  | Miss Sequence                     |
|-------------|-----------|-----------|-----------|--------|-----------------------------------|
| 18 - 27     | 1145.6647 | 1144.6574 | 1144.5771 | 0.0803 | 1 K.NCVAIAADRR.F                  |
| 28 - 41     | 1613.9304 | 1612.9231 | 1612.7919 | 0.1311 | 0 R.FGIQAQMVTDFQK.I               |
| 28 - 41     | 1629.9156 | 1628.9083 | 1628.7869 | 0.1215 | 0 R.FGIQAQMVTDFQK.I Oxidation (M) |
| 49 - 66     | 1889.1923 | 1888.1850 | 1888.0418 | 0.1432 | 0 R.LYIGLAGLATDVQTVAQR.L          |
| 69 - 77     | 1195.7779 | 1194.7706 | 1194.6761 | 0.0946 | 1 K.FRLNLYELK.E                   |
| 99 - 115    | 1923.1689 | 1922.1617 | 1921.9938 | 0.1679 | 1 K.RFGPYYTEPVIAGLDPK.T           |
| 100 - 115   | 1767.0362 | 1766.0289 | 1765.8927 | 0.1362 | 0 R.FGPYYTEPVIAGLDPK.T            |

No match to: 1206.7533, 1285.8473, 1462.8997, 1595.9515, 2076.1171

321 5'(3')-deoxyribonucleotidase, cytosolic type

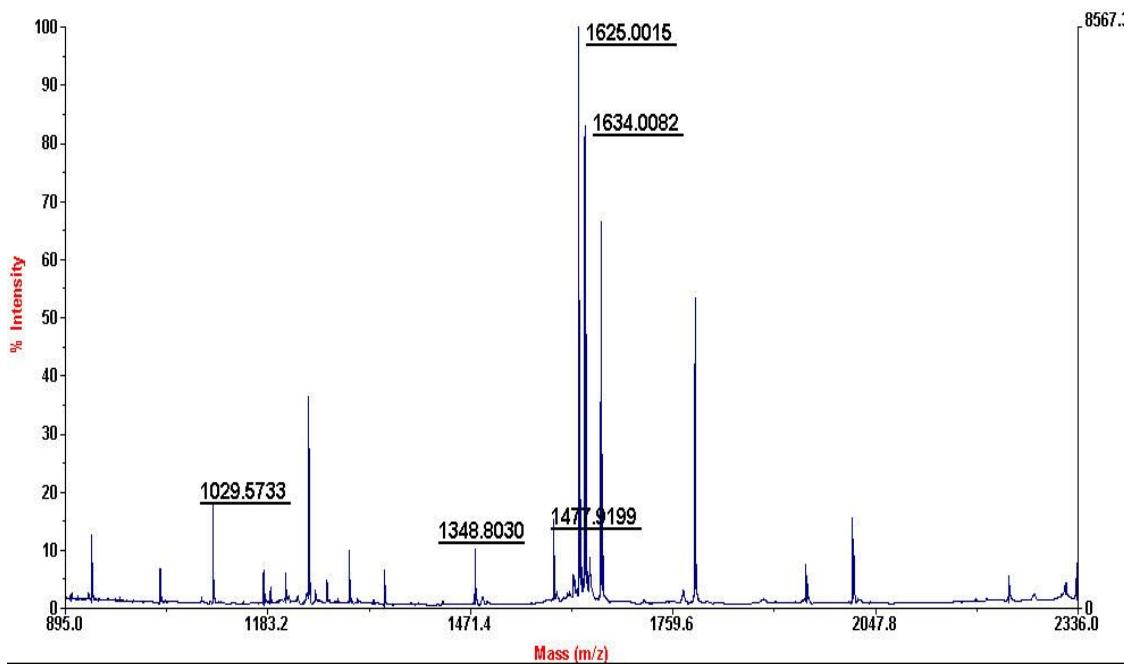

| Start - End | Observed  | Mr(expt)  | Mr(calc)  | Delta  | Miss Sequence       |
|-------------|-----------|-----------|-----------|--------|---------------------|
| 30 - 41     | 1477.9199 | 1476.9126 | 1476.7361 | 0.1765 | 0 R.FPEEPHVPLEQR.R  |
| 30 - 42     | 1634.0082 | 1633.0010 | 1632.8372 | 0.1637 | 1 R.FPEEPHVPLEQRR.G |
| 105 - 112   | 1029.5733 | 1028.5661 | 1028.4498 | 0.1163 | 0 K.YHHCVGEK.Y      |
| 105 - 114   | 1348.8030 | 1347.7957 | 1347.6142 | 0.1815 | 1 K.YHHCVGEKYR.W    |

115 - 127 1625.0015 1623.9942 1623.8158 0.1784 0 R.WVEQHLGPQFVER.I  
 170 - 177 932.6794 931.6722 931.5603 0.1118 0 R.HLVLPPTR.R

No match to: 1104.7897, 1240.6811, 1298.7444, 1589.9355, 1617.7851, 1643.7245, 1656.9720, 1690.8802, 1790.1230, 2015.2956, 2401.2871, 2433.2553

322 Heat-shock protein beta-1

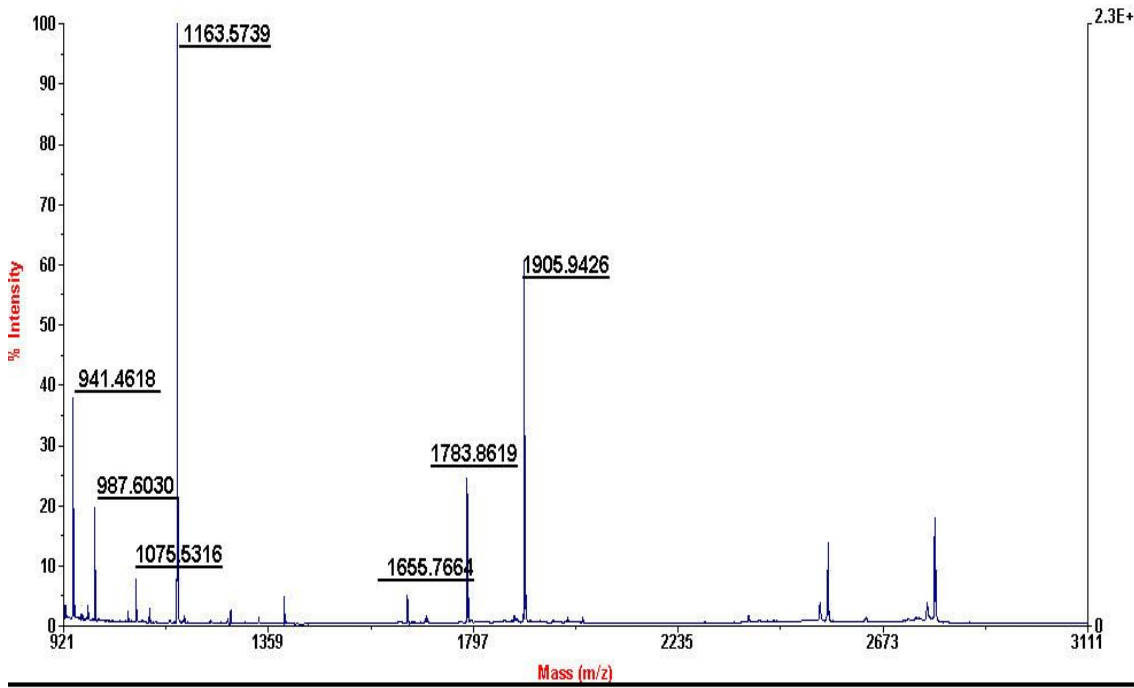

| Start - End | Observed  | Mr(expt)  | Mr(calc)  | Delta   | Miss Sequence           |
|-------------|-----------|-----------|-----------|---------|-------------------------|
| 5 - 12      | 987.6030  | 986.5957  | 986.6025  | -0.0068 | 1 R.RVPFSLLR.G          |
| 28 - 37     | 1163.5739 | 1162.5666 | 1162.6135 | -0.0469 | 0 R.LFDQAFGLPR.L        |
| 80 - 89     | 1075.5316 | 1074.5244 | 1074.5669 | -0.0426 | 0 R.QLSSGVSEIR.H        |
| 90 - 96     | 941.4618  | 940.4545  | 940.4627  | -0.0083 | 1 R.HTADRWR.V           |
| 97 - 112    | 1783.8619 | 1782.8546 | 1782.9152 | -0.0606 | 0 R.VSLDVNHFAPDELTVK.T  |
| 124 - 136   | 1655.7664 | 1654.7591 | 1654.7448 | 0.0144  | 1 K.HEERQDEHGYISR.C     |
| 172 - 188   | 1905.9426 | 1904.9354 | 1904.9843 | -0.0490 | 0 K.LATQSNEITIPVTFESR.A |

No match to: 1365.1378, 2537.9265, 2553.1977, 2554.1631, 2637.0182, 2782.3704, 2783.3224

323 Proteasome subunit alpha type 2

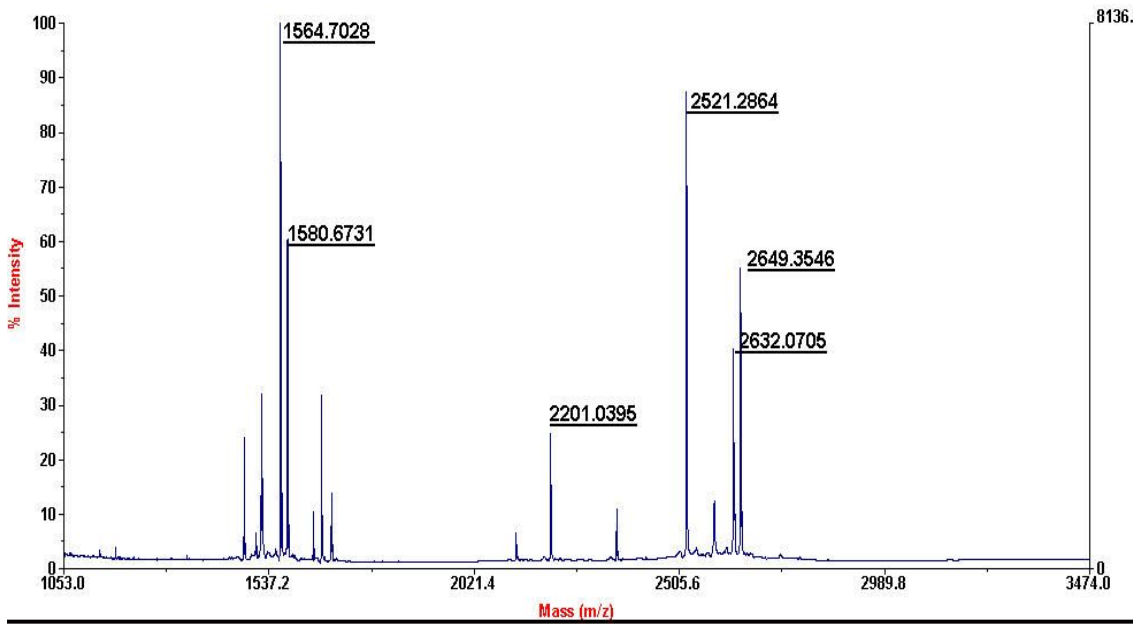

| Start - End | Observed  | Mr(expt)  | Mr(calc)  | Delta   | Miss Sequence                      |
|-------------|-----------|-----------|-----------|---------|------------------------------------|
| 71 - 84     | 1564.7028 | 1563.6955 | 1563.7504 | -0.0549 | 0 K.HIGLVYSGMGPDYR.V               |
| 71 - 84     | 1580.6731 | 1579.6658 | 1579.7453 | -0.0795 | 0 K.HIGLVYSGMGPDYR.V Oxidation (M) |
| 92 - 113    | 2649.3546 | 2648.3473 | 2648.4326 | -0.0853 | 1 R.KLAQQYYLVYQEPIPTAQLVQR.V       |
| 93 - 113    | 2521.2864 | 2520.2792 | 2520.3376 | -0.0585 | 0 K.LAQQYYLVYQEPIPTAQLVQR.V        |
| 178 - 196   | 2201.0395 | 2200.0322 | 2200.1263 | -0.0941 | 0 R.YNEDLELEDAIHTAILTK.E           |
| 197 - 219   | 2632.0705 | 2631.0632 | 2631.1217 | -0.0585 | 0 K.ESFEGQMTEDNIEVGICNEAGFR.R      |

No match to: 1519.9430, 1660.8762, 1684.7236, 2186.8565, 2505.1791, 2546.4503, 2587.1067

324 Protein-L-isoaspartate(D-aspartate) O-methyltransferase

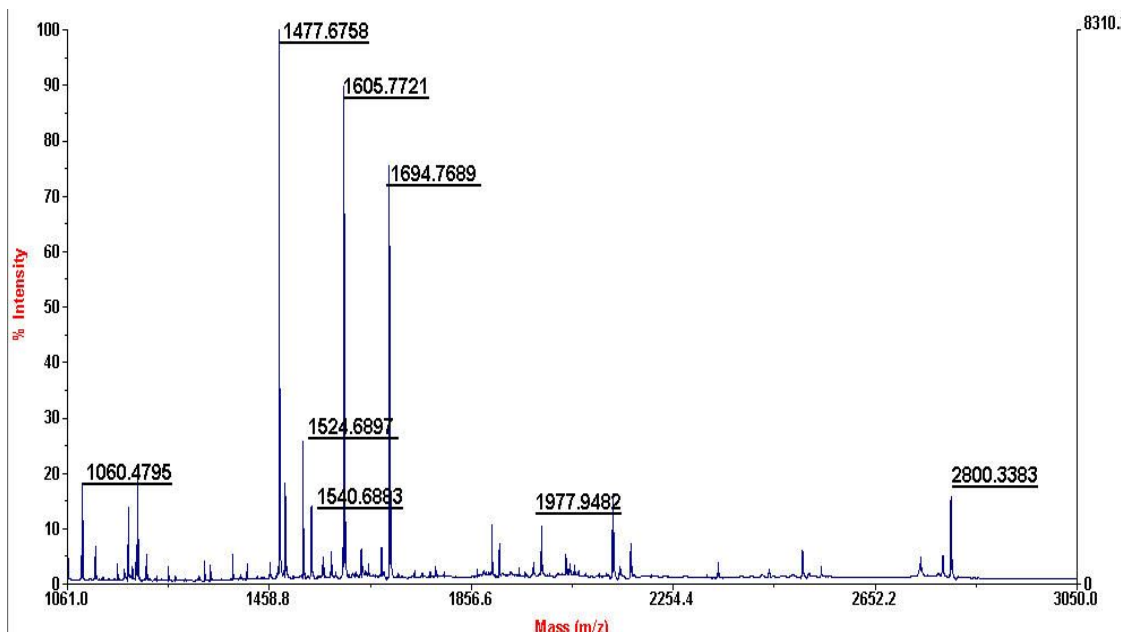

| Start - End                                          | Observed  | Mr(expt)  | Mr(calc)  | Delta   | Miss Sequence                     |
|------------------------------------------------------|-----------|-----------|-----------|---------|-----------------------------------|
| 5 - 18                                               | 1477.6758 | 1476.6685 | 1476.7433 | -0.0748 | 0 K.SGGASHSELIHNLR.K              |
| 5 - 19                                               | 1605.7721 | 1604.7648 | 1604.8383 | -0.0735 | 1 K.SGGASHSELIHNLRK.N             |
| 25 - 37                                              | 1524.6897 | 1523.6824 | 1523.7654 | -0.0830 | 1 K.TDKVFEVMLATDR.S               |
| 25 - 37                                              | 1540.6883 | 1539.6810 | 1539.7603 | -0.0793 | 1 K.TDKVFEVMLATDR.S Oxidation (M) |
| 82 - 98                                              | 1694.7689 | 1693.7616 | 1693.8458 | -0.0841 | 0 K.ALDVGS GSGILTACFAR.M          |
| 126 - 135                                            | 1060.4795 | 1059.4722 | 1059.5197 | -0.0475 | 0 K.DDPTLLSSGR.V                  |
| 179 - 204                                            | 2800.3383 | 2799.3310 | 2799.4477 | -0.1166 | 1                                 |
| <b>R.LILPVG PAGGNQMLEQYDKLQDGSIK.M Oxidation (M)</b> |           |           |           |         |                                   |
| 205 - 221                                            | 1977.9482 | 1976.9409 | 1977.0679 | -0.1270 | 1 K.MKPLMGVIYVPLTDKEK.Q           |

Oxidation (M)

No match to: 952.4784, 972.4159, 1090.4688, 1198.5725, 1489.6165, 1896.8150, 2134.9705

325 ES1 protein homolog, mitochondrial precursor

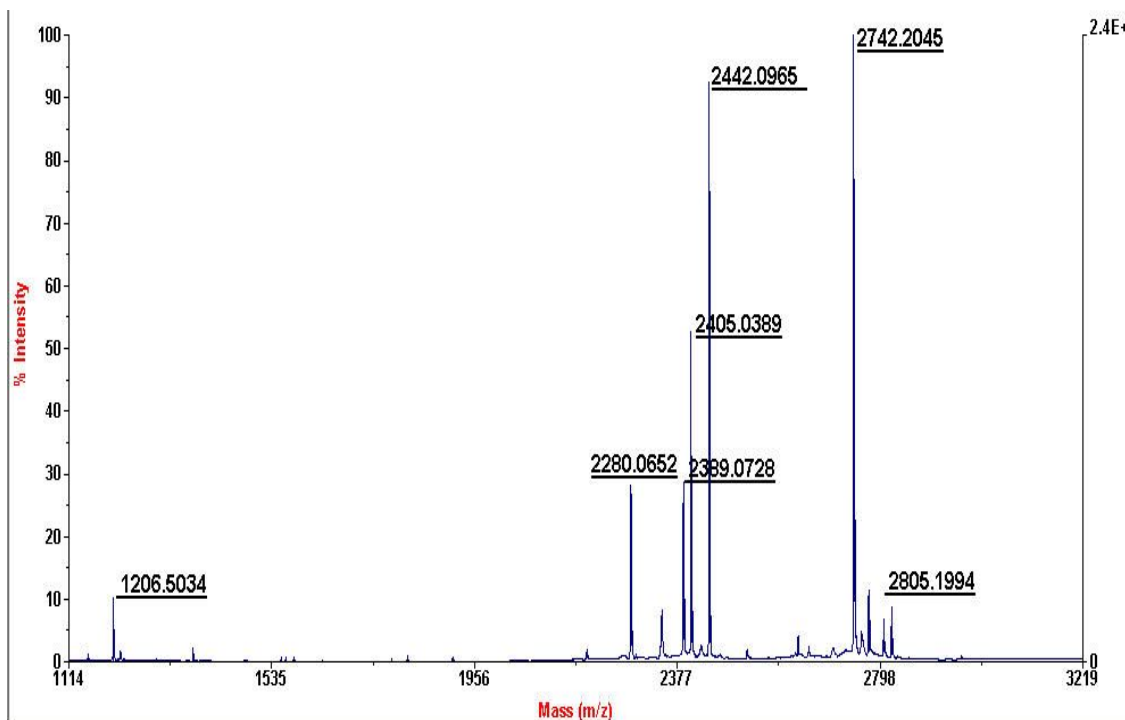

| Start - End          | Observed  | Mr(expt)  | Mr(calc)  | Delta   | Miss Sequence                 |
|----------------------|-----------|-----------|-----------|---------|-------------------------------|
| 73 - 94              | 2389.0728 | 2388.0655 | 2388.1896 | -0.1241 | 0 R.GGAEVQIFAPDVPQM HVIDHTK.G |
| 73 - 94              | 2405.0389 | 2404.0316 | 2404.1846 | -0.1530 | 0 R.GGAEVQIFAPDVPQM HVIDHTK.G |
| <b>Oxidation (M)</b> |           |           |           |         |                               |
| 117 - 141            | 2442.0965 | 2441.0892 | 2441.2339 | -0.1447 | 0                             |

**K.ITDLANLSAANHDA AIFPGGF GAAK.N**

165 - 185 2280.0652 2279.0580 2279.1918 -0.1339 0 K.EFHQAGKPIGLCCIAPVLAAK.V 2  
 189 - 214 2742.2045 2741.1972 2741.3297 -0.1325 1

R.GVEVTVGHEQEEGGKWPYAGTAEAIK.A

204 - 214 1206.5034 1205.4962 1205.6080 -0.1119 0 K.WPYAGTAEAIK.A  
 236 - 260 2805.1994 2804.1921 2804.3448 -0.1527 0

K.VVTTPAFMCEALHYIHDGIGAMVR.K ; Oxidation (M)

No match to: 2344.1367, 2345.9678, 2701.1171, 2762.1342, 2774.1865

326 3-hydroxyacyl-CoA dehydrogenase type-2

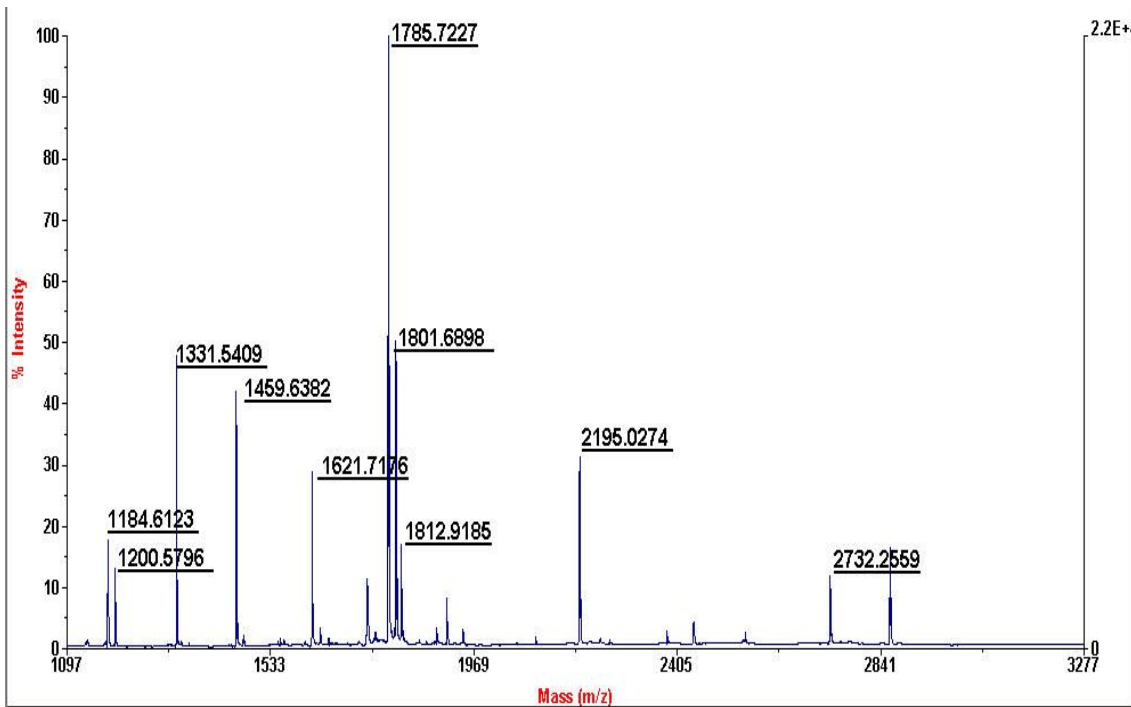

| Start - End | Observed  | Mr(expt)  | Mr(calc)  | Delta   | Miss Sequence                 |
|-------------|-----------|-----------|-----------|---------|-------------------------------|
| 10 - 29     | 1812.9185 | 1811.9112 | 1812.0105 | -0.0993 | 0 K.GLVAVITGGASGLGLATAER.L    |
| 30 - 52     | 2195.0274 | 2194.0202 | 2194.1593 | -0.1392 | 0 R.LVGQGASAVLLDLPNSGGEAQAK.K |
| 54 - 79     | 2732.2559 | 2731.2486 | 2731.3851 | -0.1365 | 1                             |

K.LGNNCVFAPADVTSEKDVQTALALAK.G

105 - 116 1459.6382 1458.6310 1458.7215 -0.0906 1 K.KGQTHLTLEDFQR.V  
 106 - 116 1331.5409 1330.5336 1330.6266 -0.0930 0 K.GQTHLTLEDFQR.V  
 131 - 147 1785.7227 1784.7154 1784.8112 -0.0957 0 R.LVAGEMGQNEPDQGGQR.G



131 - 147 1801.6898 1800.6825 1800.8061 -0.1235 0 R.LVAGEMGQNEPDQGGQR.G

Oxidation (M)

173 - 184 1184.6123 1183.6050 1183.6747 -0.0697 0 K.GGIVGMTLPIAR.D

173 - 184 1200.5796 1199.5723 1199.6696 -0.0973 0 K.GGIVGMTLPIAR.D Oxidation (M)

213 - 226 1621.7176 1620.7104 1620.8083 -0.0979 0 K.VCNFLASQVPFPSR.L

No match to: 1740.9711, 1910.8380, 2860.3627

327 Flavin reductase

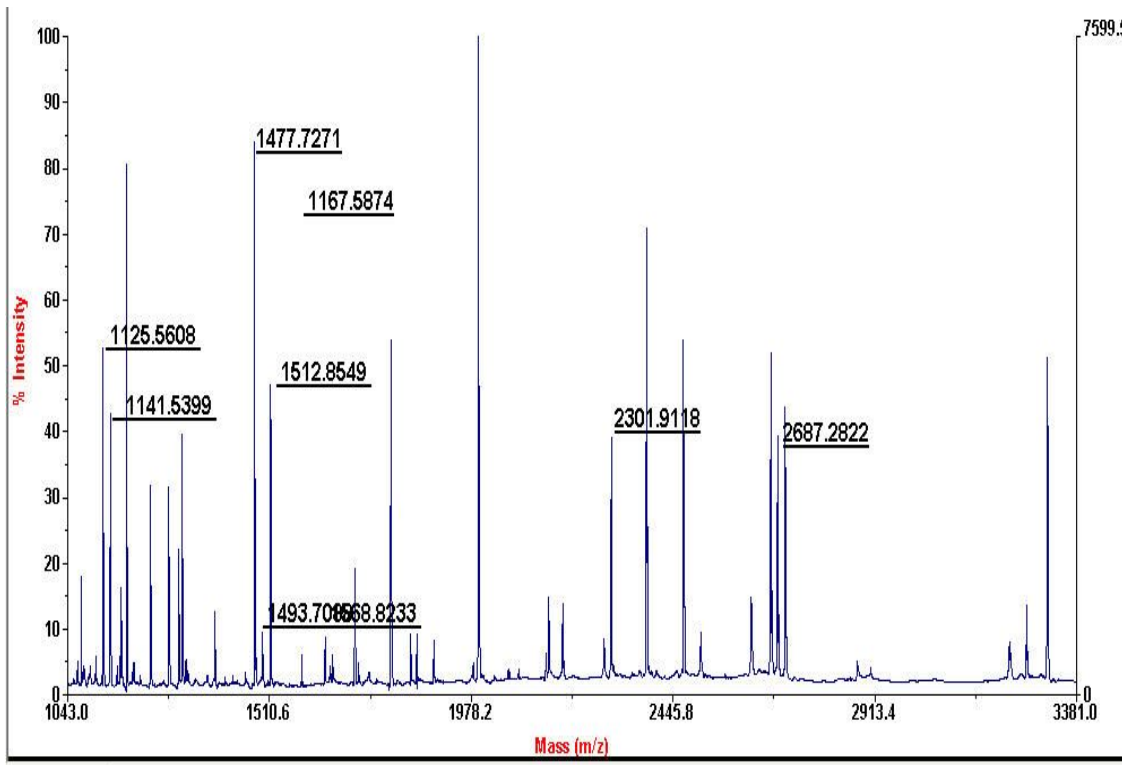

| Start - End | Observed  | Mr(expt)  | Mr(calc)  | Delta   | Miss Sequence                      |
|-------------|-----------|-----------|-----------|---------|------------------------------------|
| 64 - 78     | 1512.8549 | 1511.8477 | 1511.8672 | -0.0195 | 0 K.TVAGQDAVIVLLGTR.N              |
| 79 - 92     | 1477.7271 | 1476.7199 | 1476.6879 | 0.0320  | 0 R.NDLSPTTVMSEGAR.N               |
| 79 - 92     | 1493.7088 | 1492.7015 | 1492.6828 | 0.0187  | 0 R.NDLSPTTVMSEGAR.N Oxidation (M) |
| 125 - 134   | 1167.5874 | 1166.5801 | 1166.6044 | -0.0243 | 0 R.LQAVTDDHIR.M                   |
| 146 - 170   | 2687.2822 | 2686.2749 | 2686.3425 | -0.0676 | 0                                  |

K.YVAVMPPHIGDQPLTGAYTVTLGDR.G Oxidation (M)

|           |           |           |           |         |   |                        |               |
|-----------|-----------|-----------|-----------|---------|---|------------------------|---------------|
| 175 - 187 | 1568.8233 | 1567.8161 | 1567.8293 | -0.0133 | 1 | R.VISKHDLGHFMLR.C      | Oxidation (M) |
| 179 - 187 | 1125.5608 | 1124.5535 | 1124.5549 | -0.0014 | 0 | K.HDLGHFMLR.C          |               |
| 179 - 187 | 1141.5399 | 1140.5326 | 1140.5499 | -0.0173 | 0 | K.HDLGHFMLR.C          | Oxidation (M) |
| 188 - 206 | 2301.9118 | 2300.9045 | 2300.9281 | -0.0235 | 0 | R.CLTTDEYDGHSTYPHQYQ.- |               |

No match to: 1043.5468, 1081.1604, 1123.4862, 1508.6701, 2284.9419, 2286.8224, 2627.8323

### 328 Flavin reductase

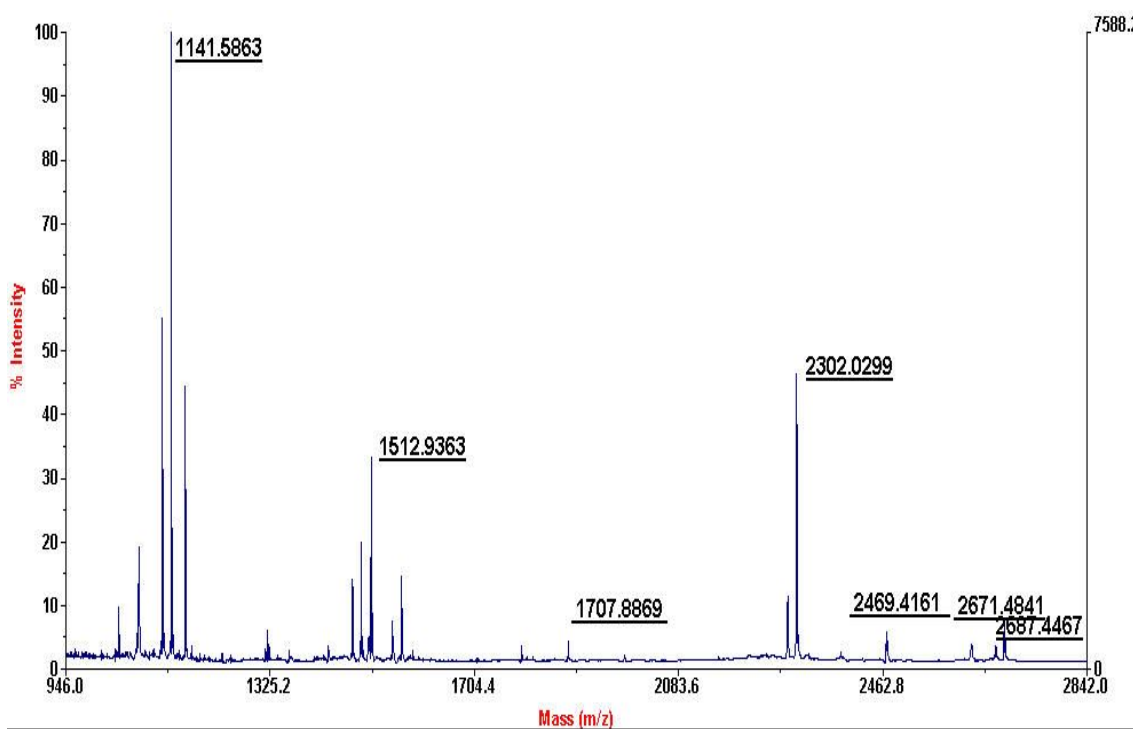

| Start - End | Observed | Mr(expt) | Mr(calc) | Delta | Miss Sequence |
|-------------|----------|----------|----------|-------|---------------|
|-------------|----------|----------|----------|-------|---------------|

|         |           |           |           |        |   |
|---------|-----------|-----------|-----------|--------|---|
| 40 - 63 | 2469.4161 | 2468.4088 | 2468.3024 | 0.1065 | 0 |
|---------|-----------|-----------|-----------|--------|---|

R.LPSEGPRPAHVVGDLQAADVDK.T

|         |           |           |           |        |   |                     |
|---------|-----------|-----------|-----------|--------|---|---------------------|
| 64 - 78 | 1512.9363 | 1511.9291 | 1511.8672 | 0.0619 | 0 | K.TVAGQDAVIVLLGTR.N |
|---------|-----------|-----------|-----------|--------|---|---------------------|

|           |           |           |           |        |   |                    |
|-----------|-----------|-----------|-----------|--------|---|--------------------|
| 106 - 120 | 1707.8869 | 1706.8797 | 1706.8702 | 0.0095 | 0 | K.VVACTSAFLLDPTK.V |
|-----------|-----------|-----------|-----------|--------|---|--------------------|

|           |           |           |           |        |   |
|-----------|-----------|-----------|-----------|--------|---|
| 146 - 170 | 2671.4841 | 2670.4768 | 2670.3476 | 0.1292 | 0 |
|-----------|-----------|-----------|-----------|--------|---|

K.YVAVMPPHIGDQPLTGAYTVTLDGR.G

|           |           |           |           |        |   |
|-----------|-----------|-----------|-----------|--------|---|
| 146 - 170 | 2687.4467 | 2686.4395 | 2686.3425 | 0.0969 | 0 |
|-----------|-----------|-----------|-----------|--------|---|

K.YVAVMPPHIGDQPLTGAYTVTLDGR.G Oxidation (M)

|           |           |           |           |        |   |               |               |
|-----------|-----------|-----------|-----------|--------|---|---------------|---------------|
| 179 - 187 | 1141.5863 | 1140.5790 | 1140.5499 | 0.0291 | 0 | K.HDLGHFMLR.C | Oxidation (M) |
|-----------|-----------|-----------|-----------|--------|---|---------------|---------------|

|           |           |           |           |        |   |                        |
|-----------|-----------|-----------|-----------|--------|---|------------------------|
| 188 - 206 | 2302.0299 | 2301.0226 | 2300.9281 | 0.0945 | 0 | R.CLTTDEYDGHSTYPHQYQ.- |
|-----------|-----------|-----------|-----------|--------|---|------------------------|

No match to: 1179.6662, 1235.6311, 1277.7813, 1307.7537, 1475.8208, 1791.8164, 1852.0231, 1994.0541, 2384.0524, 2627.5374, 2705.3035

329 Peroxiredoxin-1

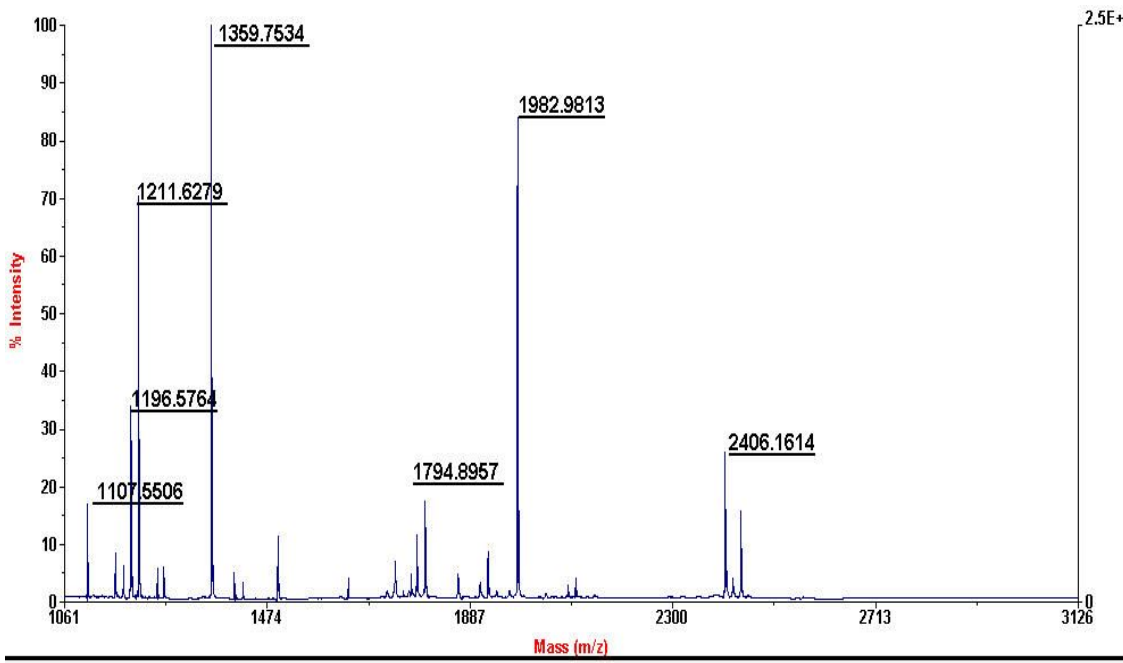

| Start - End | Observed  | Mr(expt)  | Mr(calc)  | Delta   | Miss Sequence           |
|-------------|-----------|-----------|-----------|---------|-------------------------|
| 8 - 16      | 980.4847  | 979.4775  | 979.5239  | -0.0465 | 0 K.IGHPAPNFK.A         |
| 94 - 110    | 1794.8957 | 1793.8884 | 1793.9458 | -0.0574 | 1 K.QGGLGPMNIPLVSDPKR.T |

Oxidation (M)

|           |           |           |           |         |                              |
|-----------|-----------|-----------|-----------|---------|------------------------------|
| 111 - 120 | 1107.5506 | 1106.5433 | 1106.5972 | -0.0539 | 0 R.TIAQDYGVLK.A             |
| 111 - 128 | 1982.9813 | 1981.9740 | 1982.0109 | -0.0369 | 1 R.TIAQDYGVLKADEGISFR.G     |
| 129 - 140 | 1359.7534 | 1358.7462 | 1358.7922 | -0.0460 | 1 R.GLFIIDDKGILR.Q           |
| 141 - 151 | 1211.6279 | 1210.6206 | 1210.6670 | -0.0463 | 0 R.QITVNDLPVGR.S            |
| 159 - 168 | 1196.5764 | 1195.5691 | 1195.6237 | -0.0546 | 0 R.LVQAFQFTDK.H             |
| 169 - 190 | 2406.1614 | 2405.1541 | 2405.1798 | -0.0256 | 0 K.HGEVCPAGWKPGSDTIKPDVQK.S |

No match to: 1194.6024, 1495.7237, 1718.0263, 1734.9255, 1922.9755, 2438.1194

330

Glyceraldehyde-3-phosphate dehydrogenase

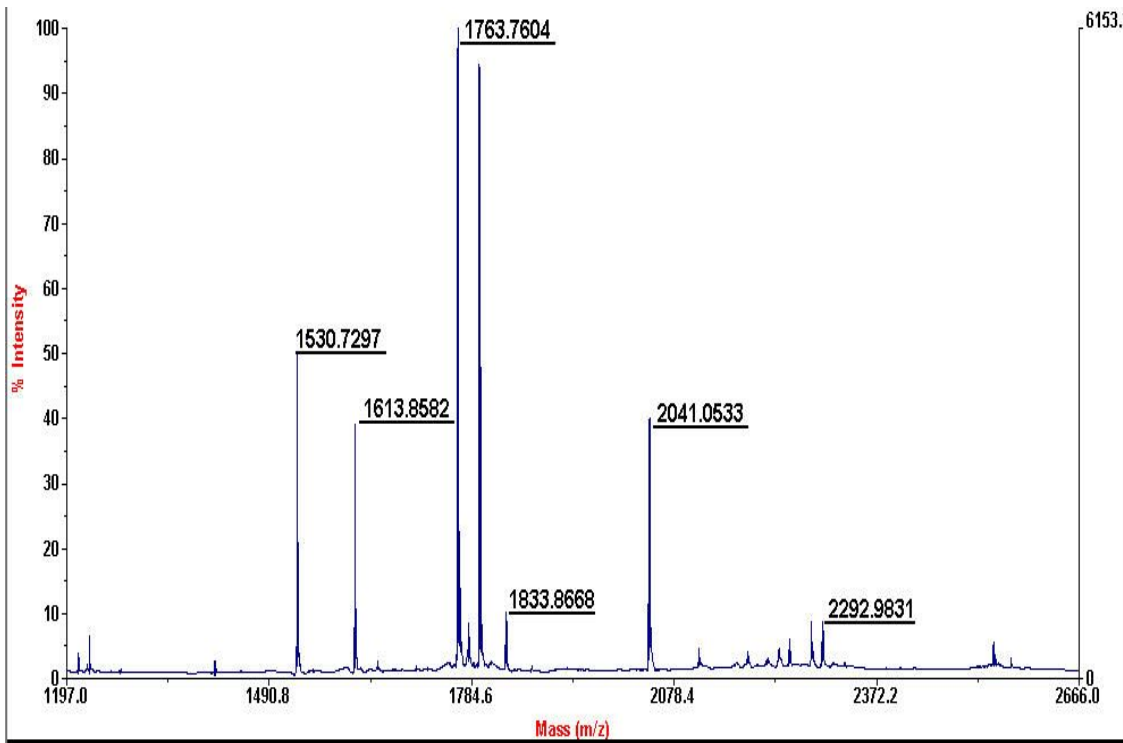

| Start - End   | Observed  | Mr(expt)  | Mr(calc)  | Delta   | Miss Sequence               |
|---------------|-----------|-----------|-----------|---------|-----------------------------|
| 67 - 80       | 1613.8582 | 1612.8510 | 1612.8937 | -0.0427 | 0 K.LVINGNPITIFQER.D        |
| 67 - 84       | 2041.0533 | 2040.0460 | 2040.1004 | -0.0544 | 1 K.LVINGNPITIFQERDPSK.I    |
| 87 - 107      | 2292.9831 | 2291.9759 | 2292.0257 | -0.0498 | 0 K.WGDAGAEYVVESTGVFTTMEK.A |
| Oxidation (M) |           |           |           |         |                             |
| 146 - 162     | 1833.8668 | 1832.8595 | 1832.9124 | -0.0529 | 0 K.IISNASCTTNCLAPLAK.V 2   |
| 235 - 248     | 1530.7297 | 1529.7224 | 1529.7872 | -0.0648 | 0 R.VPTANVSVVDLTCR.L        |
| 310 - 323     | 1763.7604 | 1762.7531 | 1762.7951 | -0.0419 | 0 K.LISWYDNEFGYSNR.V        |

No match to: 1492.7649, 1599.9716, 1614.8425, 1778.7573, 1795.7544, 1813.6603, 2042.0332, 2045.7264

331

WD repeat protein 25 - Homo sapiens

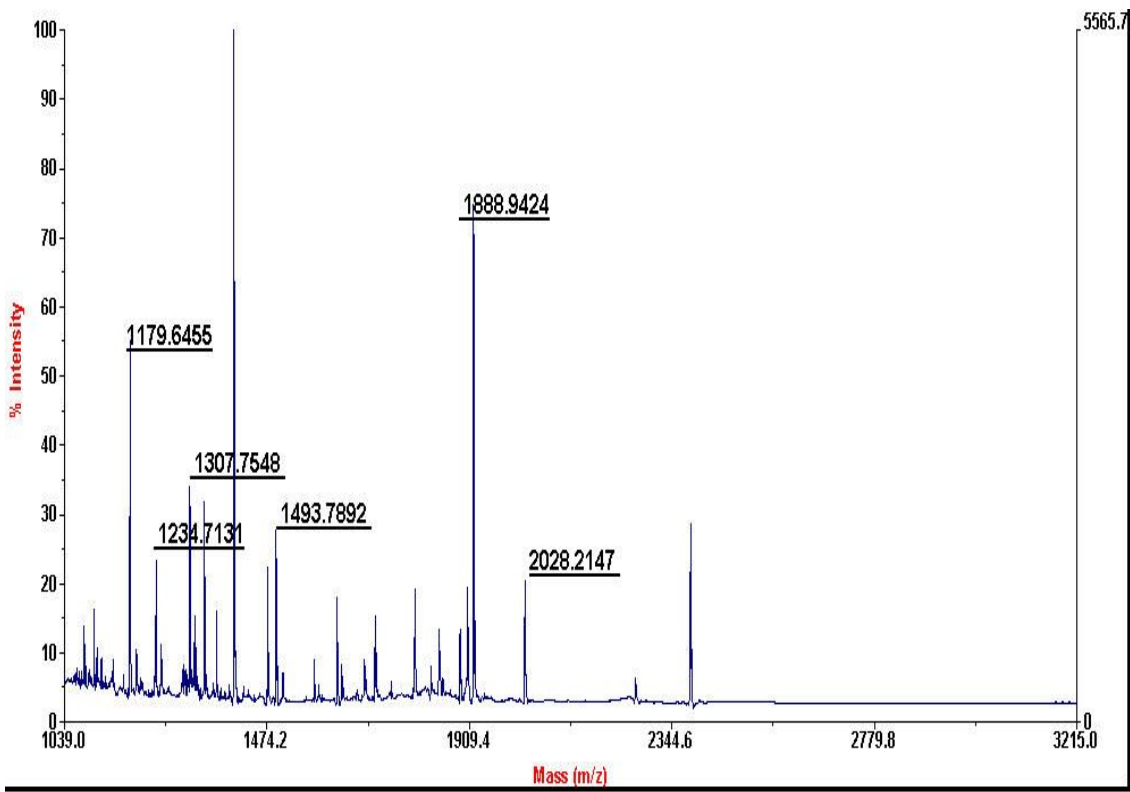

| Start - End | Observed  | Mr(expt)  | Mr(calc)  | Delta  | Miss Sequence            |
|-------------|-----------|-----------|-----------|--------|--------------------------|
| 67 - 77     | 1234.7131 | 1233.7058 | 1233.4833 | 0.2225 | 0 K.HGSCEDPGGYR.L        |
| 78 - 95     | 2028.2147 | 2027.2074 | 2027.0007 | 0.2068 | 1 R.LPLAQLGRSDWGSCPSQR.L |
| 86 - 95     | 1179.6455 | 1178.6382 | 1178.4775 | 0.1607 | 0 R.SDWGSCPSQR.L         |
| 86 - 101    | 1888.9424 | 1887.9351 | 1887.8686 | 0.0665 | 1 R.SDWGSCPSQRLQWPGK.E   |
| 146 - 159   | 1493.7892 | 1492.7819 | 1492.6794 | 0.1025 | 0 K.SSFHAQSESETVGK.N     |
| 194 - 206   | 1307.7548 | 1306.7475 | 1306.6630 | 0.0845 | 1 K.GKDVEPQGPPAGR.A      |

No match to: 1339.7688, 1403.7850, 1705.9493, 1918.0149

332 Glyceraldehyde-3-phosphate dehydrogenase

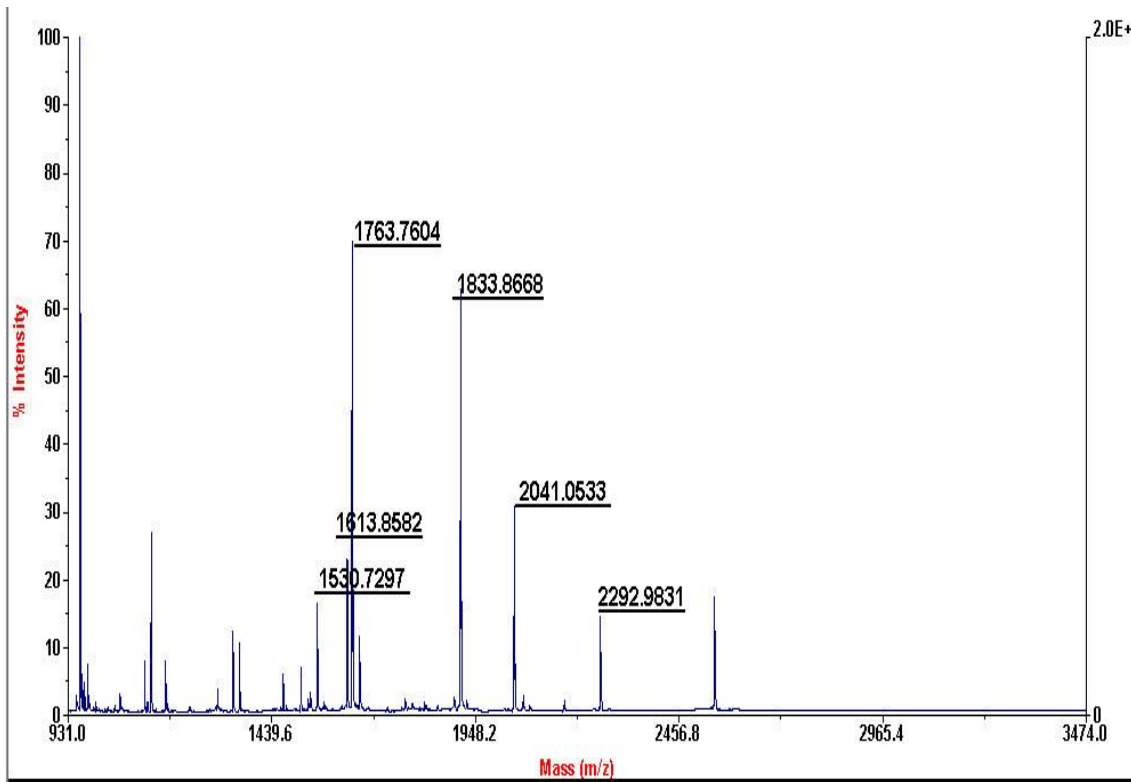

| Start - End   | Observed  | Mr(expt)  | Mr(calc)  | Delta   | Miss Sequence               |
|---------------|-----------|-----------|-----------|---------|-----------------------------|
| 67 - 80       | 1613.8582 | 1612.8510 | 1612.8937 | -0.0427 | 0 K.LVINGNPITIFQER.D        |
| 67 - 84       | 2041.0533 | 2040.0460 | 2040.1004 | -0.0544 | 1 K.LVINGNPITIFQERDPSK.I    |
| 87 - 107      | 2292.9831 | 2291.9759 | 2292.0257 | -0.0498 | 0 K.WGDAGAEYVVESTGVFTTMEK.A |
| Oxidation (M) |           |           |           |         |                             |
| 146 - 162     | 1833.8668 | 1832.8595 | 1832.9124 | -0.0529 | 0 K.IISNASCTTNCLAPLAK.V 2   |
| 235 - 248     | 1530.7297 | 1529.7224 | 1529.7872 | -0.0648 | 0 R.VPTANVSVVDLTCR.L        |
| 310 - 323     | 1763.7604 | 1762.7531 | 1762.7951 | -0.0419 | 0 K.LISWYDNEFGYSNR.V        |

No match to: 1492.7649, 1599.9716, 1614.8425, 1778.7573, 1795.7544, 1813.6603, 2042.0332, 2045.7264

333 S-methyl-5-thioadenosine phosphorylase

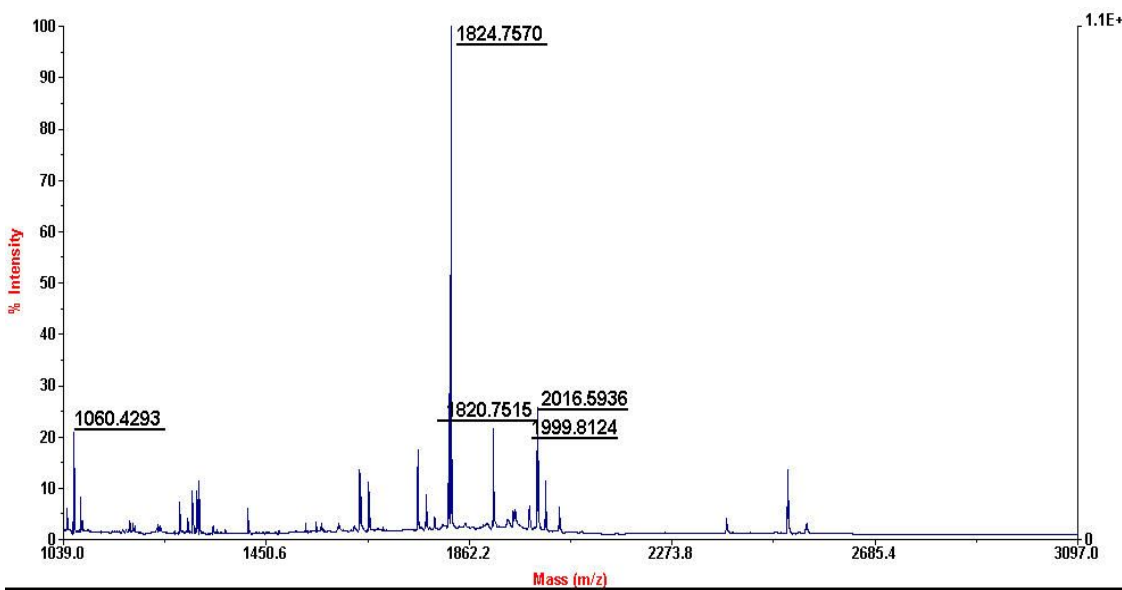

| Start - End   | Observed  | Mr(expt)  | Mr(calc)  | Delta   | Miss Sequence               |
|---------------|-----------|-----------|-----------|---------|-----------------------------|
| 12 - 29       | 1824.7570 | 1823.7498 | 1823.9629 | -0.2131 | 0 K.IGIIGGTGLDDPEILEGR.T    |
| 33 - 49       | 1820.7515 | 1819.7442 | 1819.9720 | -0.2278 | 0 K.YVDTPFGKPSDALILGK.I     |
| 100 - 116     | 1999.8124 | 1998.8051 | 1999.0262 | -0.2211 | 0 R.EEIQPGDIVIIDQFIDR.T     |
| 117 - 133     | 2016.5936 | 2015.5863 | 2015.8578 | -0.2715 | 0 R.TTMRPQSFYDGSWSCAR.G ;   |
| Oxidation (M) |           |           |           |         |                             |
| 167 - 176     | 1060.4293 | 1059.4220 | 1059.5383 | -0.1162 | 0 K.GTMVTIEGPR.F            |
| 181 - 187     | 903.2523  | 902.2450  | 902.3956  | -0.1506 | 0 R.AESFMFR.T Oxidation (M) |

No match to: 960.4260, 1059.4522, 1639.7348, 1757.6175, 1898.2372, 1910.7127, 1962.2760

334 Phosphoglycerate mutase 1

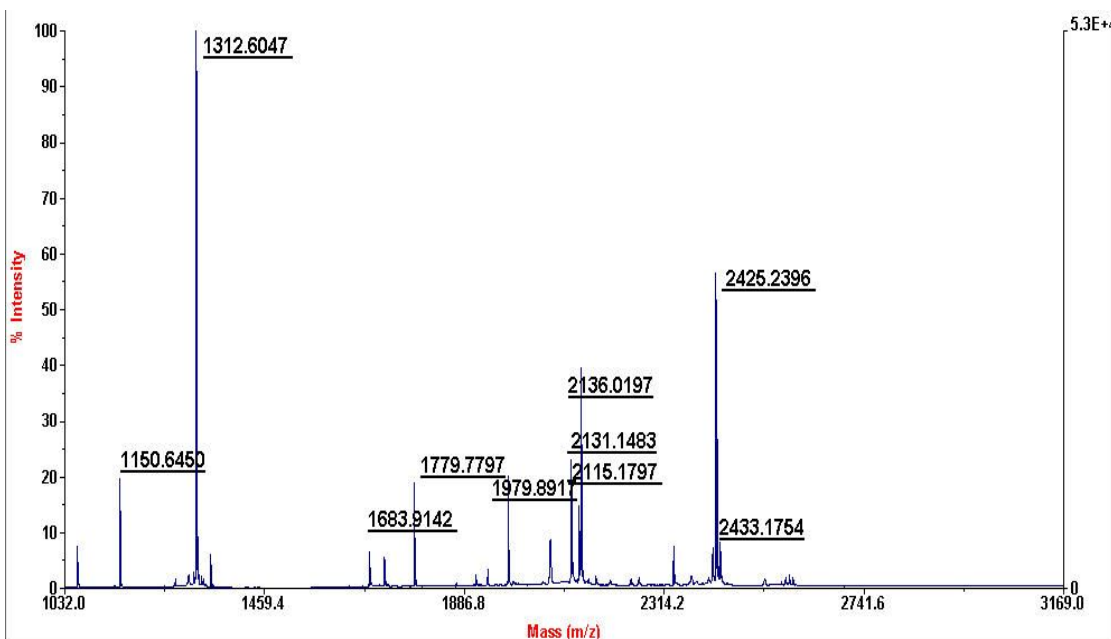

| Start - End | Observed  | Mr(expt)  | Mr(calc)  | Delta   | Miss Sequence               |
|-------------|-----------|-----------|-----------|---------|-----------------------------|
| 11 - 21     | 1312.6047 | 1311.5974 | 1311.5956 | 0.0018  | 0 R.HGESAWNLENR.F           |
| 22 - 39     | 1979.8917 | 1978.8845 | 1978.8697 | 0.0148  | 0 R.FSGWYDADLSPAGHEEAK.R    |
| 22 - 40     | 2136.0197 | 2135.0124 | 2134.9708 | 0.0416  | 1 R.FSGWYDADLSPAGHEEAKR.G   |
| 47 - 61     | 1779.7797 | 1778.7724 | 1778.7822 | -0.0097 | 0 R.DAGYEFDICFTSVQK.R       |
| 118 - 138   | 2433.1754 | 2432.1682 | 2432.0995 | 0.0687  | 0 R.SYDVPPPPMEPDHPFYSNISK.D |

Oxidation (M)

|           |           |           |           |         |                             |
|-----------|-----------|-----------|-----------|---------|-----------------------------|
| 142 - 162 | 2425.2396 | 2424.2323 | 2424.1478 | 0.0845  | 1 R.YADLTEDQLPSCESLKDTIAR.A |
| 163 - 176 | 1683.9142 | 1682.9069 | 1682.9032 | 0.0037  | 0 R.ALPFWNEEIVPQIK.E        |
| 181 - 191 | 1150.6450 | 1149.6377 | 1149.6618 | -0.0241 | 0 R.VLIAAHGNSLR.G           |
| 223 - 240 | 2115.1797 | 2114.1724 | 2114.1194 | 0.0530  | 0 K.NLKPIKPMQFLGDEETVR.K    |
| 223 - 240 | 2131.1483 | 2130.1410 | 2130.1143 | 0.0267  | 0 K.NLKPIKPMQFLGDEETVR.K    |

Oxidation (M)

No match to: 2070.2378

335 Triosephosphate isomerase

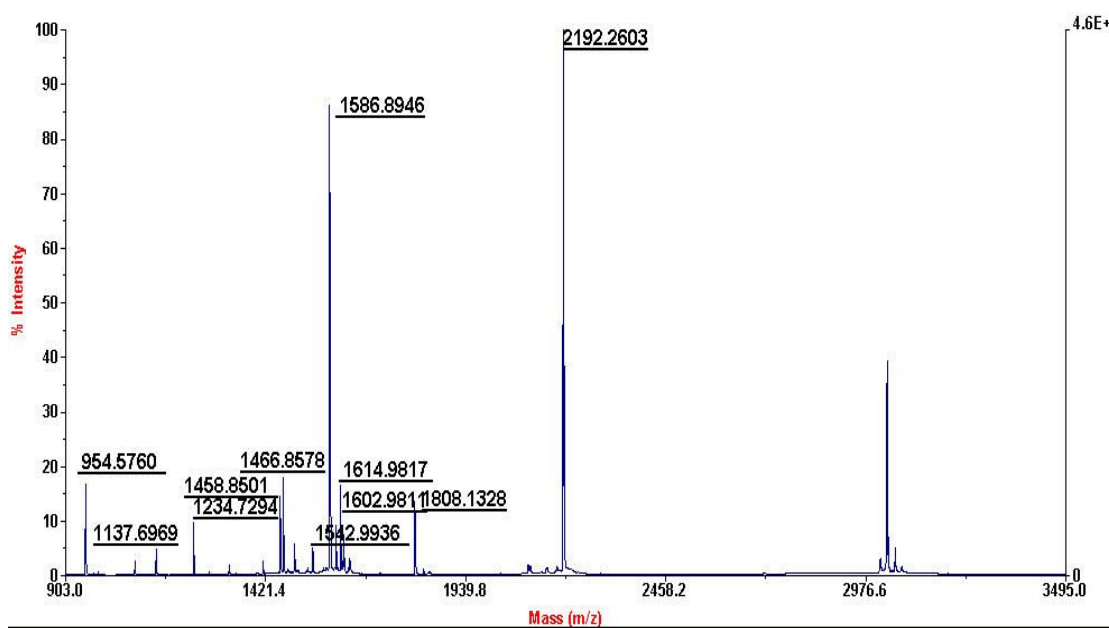

| Start - End | Observed | Mr(expt) | Mr(calc) | Delta  | Miss Sequence  |
|-------------|----------|----------|----------|--------|----------------|
| 7 - 14      | 954.5760 | 953.5687 | 953.4760 | 0.0928 | 0 K.FFVGGNWK.M |



|           |           |           |           |        |   |                          |
|-----------|-----------|-----------|-----------|--------|---|--------------------------|
| 19 - 33   | 1542.9936 | 1541.9863 | 1541.8777 | 0.1086 | 1 | R.KQSLGELIGTLNAAK.V      |
| 34 - 53   | 2192.2603 | 2191.2531 | 2191.0620 | 0.1911 | 0 | K.VPADTEVVCAPPTAYIDFAR.Q |
| 60 - 69   | 1137.6969 | 1136.6897 | 1136.5648 | 0.1248 | 0 | K.IAVAAQNCYK.V           |
| 86 - 99   | 1586.8946 | 1585.8873 | 1585.7307 | 0.1566 | 0 | K.DCGATWVVLGHSER.R       |
| 100 - 113 | 1614.9817 | 1613.9745 | 1613.8162 | 0.1583 | 1 | R.RHVFGESDELIGQK.V       |
| 101 - 113 | 1458.8501 | 1457.8428 | 1457.7151 | 0.1277 | 0 | R.HVFGESDELIGQK.V        |
| 114 - 131 | 1808.1328 | 1807.1255 | 1806.9662 | 0.1594 | 0 | K.VAHALAEGLGVIACIGEK.L   |
| 161 - 175 | 1602.9811 | 1601.9738 | 1601.8817 | 0.0921 | 0 | K.VVLAYEPVWAIGTGK.T      |
| 176 - 188 | 1466.8578 | 1465.8505 | 1465.7161 | 0.1344 | 0 | K.TATPQQAQEVHEK.L        |
| 195 - 206 | 1234.7294 | 1233.7221 | 1233.5949 | 0.1272 | 0 | K.SNVSDAVAQSTR.I         |

No match to: 2107.8306

336

Triosephosphate isomerase

| Start - End | Observed  | Mr(expt)  | Mr(calc)  | Delta   | Miss | Sequence            |
|-------------|-----------|-----------|-----------|---------|------|---------------------|
| 7 - 14      | 954.3618  | 953.3545  | 953.4760  | -0.1214 | 0    | K.FFVGGNWK.M        |
| 86 - 99     | 1586.5029 | 1585.4956 | 1585.7307 | -0.2351 | 0    | K.DCGATWVVLGHSER.R  |
| 100 - 113   | 1614.5671 | 1613.5599 | 1613.8162 | -0.2563 | 1    | R.RHVFGESDELIGQK.V  |
| 101 - 113   | 1458.4737 | 1457.4664 | 1457.7151 | -0.2487 | 0    | R.HVFGESDELIGQK.V   |
| 161 - 175   | 1602.6047 | 1601.5974 | 1601.8817 | -0.2843 | 0    | K.VVLAYEPVWAIGTGK.T |

No match to: 986.3295, 1495.5311, 1618.5019, 1634.5922, 1807.6714, 2191.7170

337 Serum albumin precursor - Homo sapiens

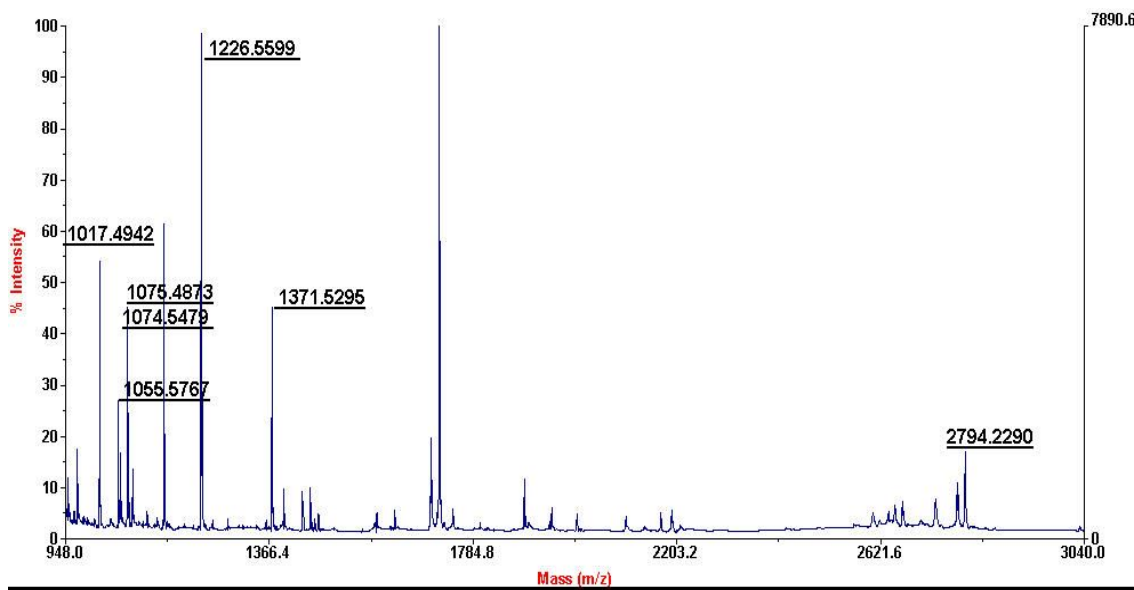

| Start - End                                        | Observed  | Mr(expt)  | Mr(calc)  | Delta   | Miss Sequence        |
|----------------------------------------------------|-----------|-----------|-----------|---------|----------------------|
| 25 - 34                                            | 1149.5711 | 1148.5638 | 1148.5686 | -0.0049 | 1 R.DAHKSEVAHR.F     |
| 35 - 44                                            | 1226.5599 | 1225.5526 | 1225.5979 | -0.0453 | 1 R.FKDLGEENFK.A     |
| 89 - 97                                            | 1017.4942 | 1016.4869 | 1016.5291 | -0.0422 | 0 K.SLHTLFGDK.L      |
| 98 - 105                                           | 933.4966  | 932.4893  | 932.5113  | -0.0220 | 0 K.LCTVATLR.E       |
| 118 - 130                                          | 1714.7645 | 1713.7572 | 1713.7893 | -0.0321 | 1 K.QEPERNECFLQHK.D  |
| 123 - 130                                          | 1075.4873 | 1074.4801 | 1074.4917 | -0.0116 | 0 R.NECFLQHK.D       |
| 131 - 138                                          | 940.4369  | 939.4296  | 939.4410  | -0.0114 | 0 K.DDNPNLPR.L       |
| 139 - 161                                          | 2794.2290 | 2793.2217 | 2793.3466 | -0.1249 | 1                    |
| <b>R.LVRPEVDVMCTAFHDNEETFLKK.Y ; Oxidation (M)</b> |           |           |           |         |                      |
| 161 - 168                                          | 1055.5767 | 1054.5695 | 1054.5811 | -0.0116 | 1 K.KYLYEIAR.R       |
| 162 - 168                                          | 927.4944  | 926.4871  | 926.4861  | 0.0010  | 0 K.YLYEIAR.R        |
| 187 - 198                                          | 1371.5295 | 1370.5222 | 1370.5595 | -0.0373 | 0 K.AAFTECCQAADK.A 2 |
| 206 - 214                                          | 1074.5479 | 1073.5406 | 1073.5353 | 0.0053  | 1 K.LDELRDEGK.A      |

No match to: 1697.7581, 2734.9902

338 Purine nucleoside phosphorylase

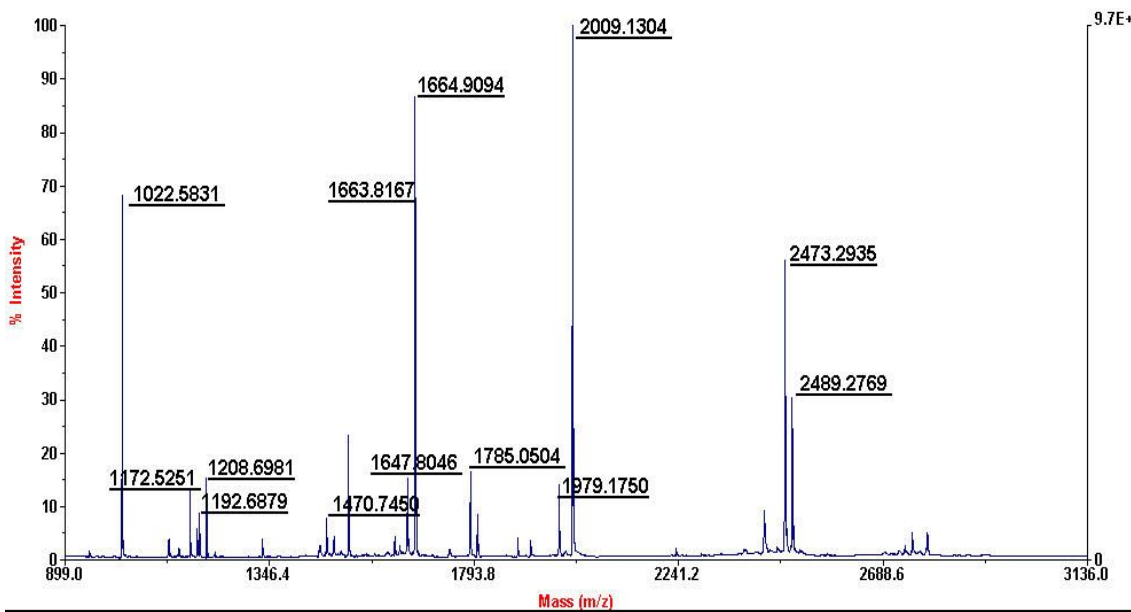

| Start - End | Observed  | Mr(expt)  | Mr(calc)  | Delta  | Miss Sequence                                |
|-------------|-----------|-----------|-----------|--------|----------------------------------------------|
| 23 - 41     | 1979.1750 | 1978.1678 | 1978.0418 | 0.1259 | 0 K.HRPQVAICGSLGGLTDK.L                      |
| 42 - 58     | 2009.1304 | 2008.1231 | 2008.0054 | 0.1177 | 0 K.LTQAQIFDYGEIPNFR.S                       |
| 68 - 76     | 1022.5831 | 1021.5758 | 1021.5709 | 0.0049 | 0 R.LVFGFLNGR.A                              |
| 85 - 95     | 1470.7450 | 1469.7377 | 1469.6802 | 0.0576 | 0 R.FHMYEGYPLWK.V                            |
| 124 - 133   | 1192.6879 | 1191.6806 | 1191.6322 | 0.0485 | 0 K.FEVDIMLIR.D                              |
| 124 - 133   | 1208.6981 | 1207.6908 | 1207.6271 | 0.0637 | 0 K.FEVDIMLIR.D Oxidation (M)                |
| 155 - 168   | 1647.8046 | 1646.7973 | 1646.7147 | 0.0825 | 1 R.FGDRFPAMSDAYDR.T                         |
| 155 - 168   | 1663.8167 | 1662.8094 | 1662.7097 | 0.0998 | 1 R.FGDRFPAMSDAYDR.T Oxidation (M)           |
| 159 - 168   | 1172.5251 | 1171.5178 | 1171.4968 | 0.0210 | 0 R.FPAMSDAYDR.T                             |
| 186 - 207   | 2473.2935 | 2472.2862 | 2472.1301 | 0.1561 | 0 R.ELQEGTYVMVAGPSFETVAECR.V                 |
| 186 - 207   | 2489.2769 | 2488.2696 | 2488.1250 | 0.1446 | 0 R.ELQEGTYVMVAGPSFETVAECR.V ; Oxidation (M) |
| 212 - 229   | 1785.0504 | 1784.0432 | 1783.9502 | 0.0929 | 0 K.LGADAVGMSTVPEVIVAR.H                     |
| 255 - 270   | 1664.9094 | 1663.9021 | 1663.8641 | 0.0380 | 1 K.ANHEEVLAAGKQAAQK.L                       |

No match to: 1023.5752, 1518.7437, 2429.3880

339 Phosphoglycerate mutase 1

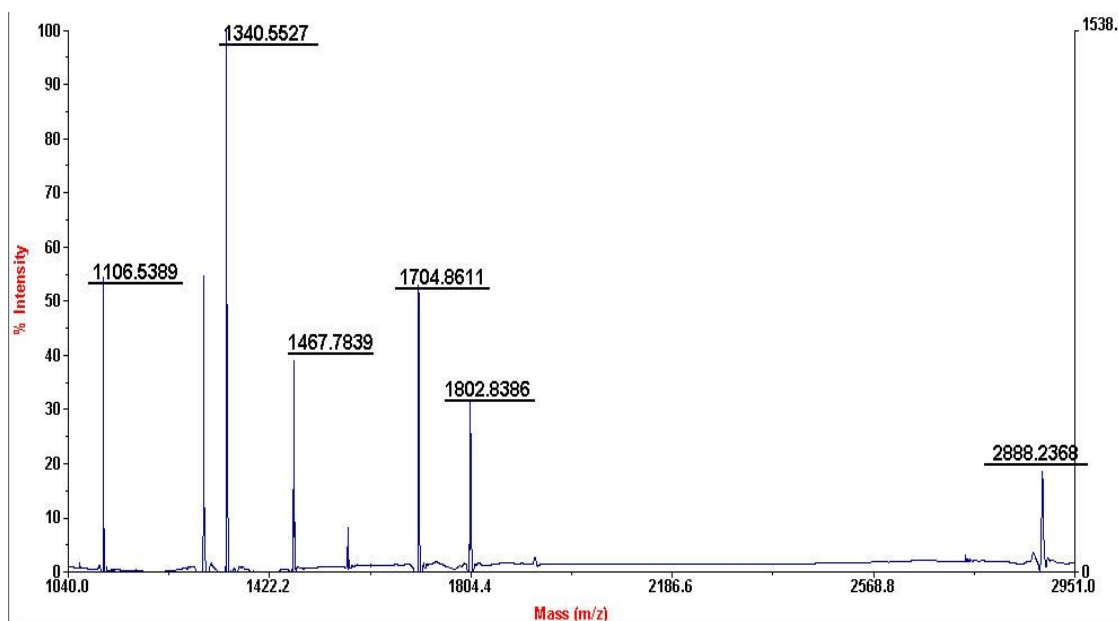

| Start - End | Observed  | Mr(expt)  | Mr(calc)  | Delta   | Miss Sequence                |
|-------------|-----------|-----------|-----------|---------|------------------------------|
| 11 - 21     | 1312.5873 | 1311.5800 | 1311.5956 | -0.0155 | 0 R.HGESAWNLENR.F            |
| 22 - 39     | 1979.8618 | 1978.8546 | 1978.8697 | -0.0152 | 0 R.FSGWYDADLSPAGHEEAK.R     |
| 22 - 40     | 2135.9409 | 2134.9336 | 2134.9708 | -0.0372 | 1 R.FSGWYDADLSPAGHEEAKR.G    |
| 47 - 61     | 1779.7725 | 1778.7652 | 1778.7822 | -0.0169 | 0 R.DAGYEFDICFTSVQK.R        |
| 91 - 100    | 1059.5491 | 1058.5418 | 1058.5509 | -0.0091 | 0 R.HYGGLTGLNK.A             |
| 118 - 138   | 2433.0867 | 2432.0795 | 2432.0995 | -0.0200 | 0 R.SYDVPPPPMEPDHPPFYSNISK.D |

Oxidation (M)

|           |           |           |           |         |                             |
|-----------|-----------|-----------|-----------|---------|-----------------------------|
| 142 - 162 | 2425.1266 | 2424.1193 | 2424.1478 | -0.0285 | 1 R.YADLTEDQLPSCESLKDTIAR.A |
| 181 - 191 | 1150.6715 | 1149.6642 | 1149.6618 | 0.0024  | 0 R.VLIAAHGNSLR.G           |
| 223 - 240 | 2115.1216 | 2114.1144 | 2114.1194 | -0.0050 | 0 K.NLKPIKPMQFLGDEETVR.K    |
| 223 - 240 | 2131.0870 | 2130.0797 | 2130.1143 | -0.0346 | 0 K.NLKPIKPMQFLGDEETVR.K    |

Oxidation (M)

No match to: 2070.1526, 2072.0240, 2373.0369

340 Enoyl-CoA hydratase, mitochondrial precursor

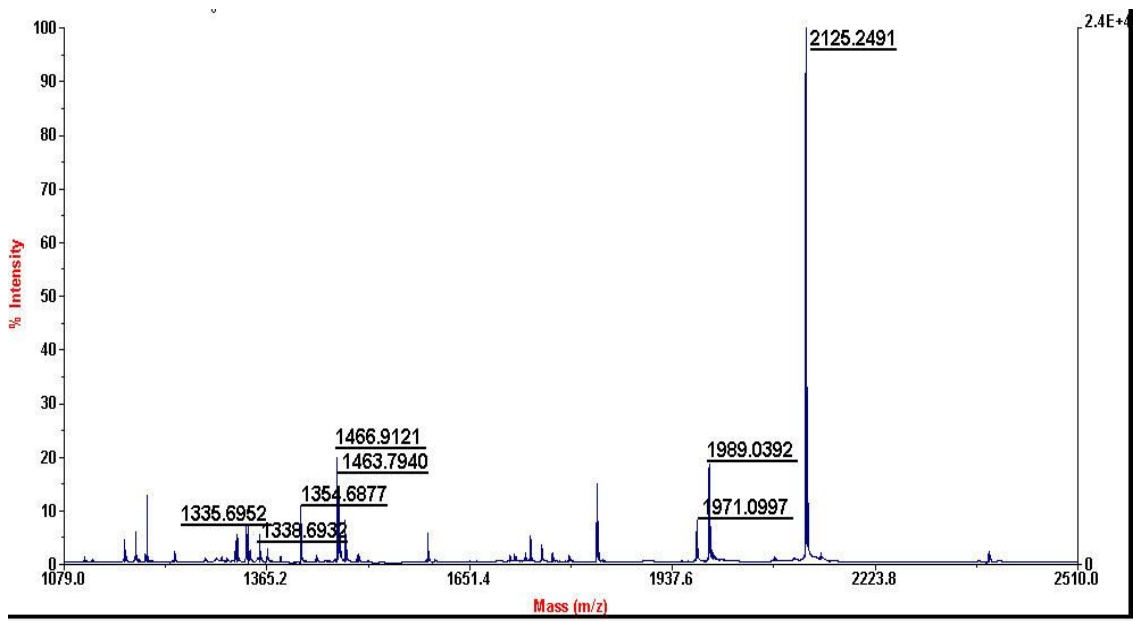

| Start - End | Observed  | Mr(expt)  | Mr(calc)  | Delta  | Miss Sequence                      |
|-------------|-----------|-----------|-----------|--------|------------------------------------|
| 44 - 56     | 1466.9121 | 1465.9048 | 1465.8365 | 0.0683 | 0 K.NNTVGLIQLNRPK.A                |
| 57 - 74     | 1971.0997 | 1970.0924 | 1970.0142 | 0.0782 | 0 K.ALNALCDGLIDELNQALK.T           |
| 158 - 178   | 2125.2491 | 2124.2419 | 2124.1328 | 0.1091 | 0 K.AQFAQPEILIGTIPGAGGTQR.L        |
| 186 - 197   | 1338.6932 | 1337.6860 | 1337.6319 | 0.0541 | 0 K.SLAMEMVLTGDR.I Oxidation (M)   |
| 186 - 197   | 1354.6877 | 1353.6804 | 1353.6268 | 0.0536 | 0 K.SLAMEMVLTGDR.I 2 Oxidation (M) |
| 212 - 228   | 1989.0392 | 1988.0319 | 1987.9594 | 0.0725 | 0 K.ICPVETLVEEAIQCAEK.I 2          |
| 262 - 272   | 1335.6952 | 1334.6879 | 1334.6143 | 0.0736 | 0 K.LFYSTFATDDR.K                  |
| 262 - 273   | 1463.7940 | 1462.7867 | 1462.7092 | 0.0775 | 1 K.LFYSTFATDDRK.E                 |

No match to: 1195.6078, 1412.7595, 1475.8085, 1831.0081

341 Annexin A1

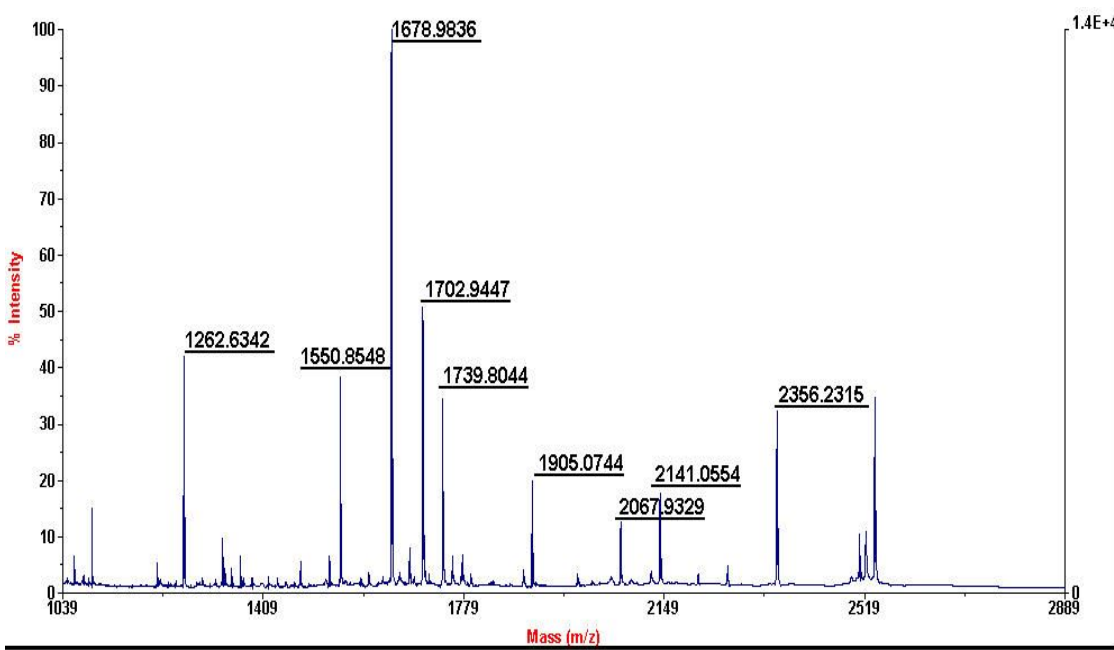

| Start - End | Observed  | Mr(expt)  | Mr(calc)  | Delta  | Miss Sequence                  |
|-------------|-----------|-----------|-----------|--------|--------------------------------|
| 10 - 26     | 2141.0554 | 2140.0481 | 2140.0113 | 0.0369 | 0 K.QAWFIENEEQEYVQTVK.S        |
| 30 - 53     | 2356.2315 | 2355.2243 | 2355.1495 | 0.0747 | 0 K.GGPGSAVSPYPTFNPSSDVAALHK.A |
| 82 - 98     | 1905.0744 | 1904.0672 | 1904.0255 | 0.0417 | 1 K.AAYLQETGKPLDETLKK.A        |
| 114 - 124   | 1262.6342 | 1261.6269 | 1261.5939 | 0.0330 | 0 K.TPAQFDADEL.R.A             |
| 129 - 144   | 1702.9447 | 1701.9374 | 1701.8785 | 0.0589 | 0 K.GLGTDEDTLIEILASR.T         |
| 186 - 204   | 2067.9329 | 2066.9256 | 2066.8777 | 0.0479 | 1 K.GDRSEDFGVNEDLADSDAR.A      |
| 189 - 204   | 1739.8044 | 1738.7971 | 1738.7282 | 0.0689 | 0 R.SEDFGVNEDLADSDAR.A         |
| 214 - 228   | 1678.9836 | 1677.9763 | 1677.9050 | 0.0713 | 1 R.KGTDVNVFNTILTTR.S          |
| 215 - 228   | 1550.8548 | 1549.8476 | 1549.8100 | 0.0375 | 0 K.GTDVNVFNTILTTR.S           |

No match to: 926.4785, 972.5301, 1092.6316, 1644.8739, 2537.2449

342

D-beta-hydroxybutyrate dehydrogenase, mitochondrial precursor

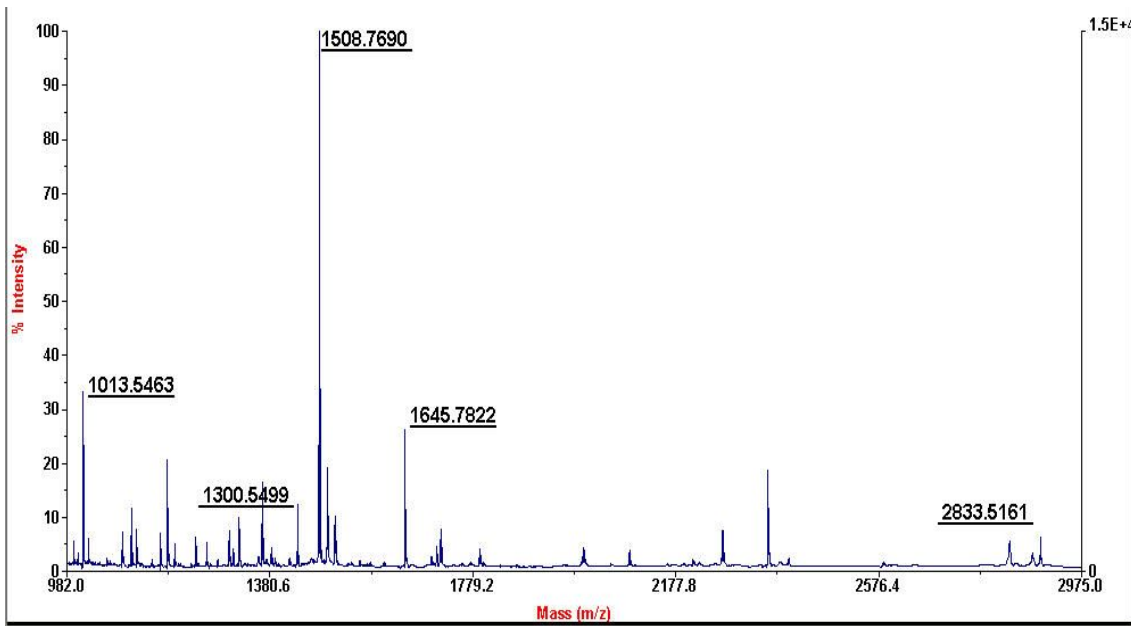

| Start - End | Observed  | Mr(expt)  | Mr(calc)  | Delta  | Miss Sequence |
|-------------|-----------|-----------|-----------|--------|---------------|
| 45 - 73     | 2833.5161 | 2832.5089 | 2832.4004 | 0.1085 | 1             |

**R.TYASAAEPVGSKAVLVTGCDSGFGFLAK.H**

|           |           |           |           |         |   |                               |
|-----------|-----------|-----------|-----------|---------|---|-------------------------------|
| 200 - 212 | 1508.7690 | 1507.7617 | 1507.7275 | 0.0342  | 1 | R.MANPARSPYCITK.F             |
| 213 - 223 | 1300.5499 | 1299.5426 | 1299.5918 | -0.0491 | 0 | K.FGVEAFSDCLR.Y               |
| 276 - 283 | 1013.5463 | 1012.5390 | 1012.5229 | 0.0161  | 1 | K.YFDEKIAK.M                  |
| 315 - 325 | 1645.7822 | 1644.7750 | 1644.7184 | 0.0566  | 0 | R.YHPMDYYWWLR.M Oxidation (M) |

No match to: 1365.6449, 1434.7310, 1477.6980, 1493.7019, 2270.0582, 2358.1232

**343 Glutathione transferase omega-1**

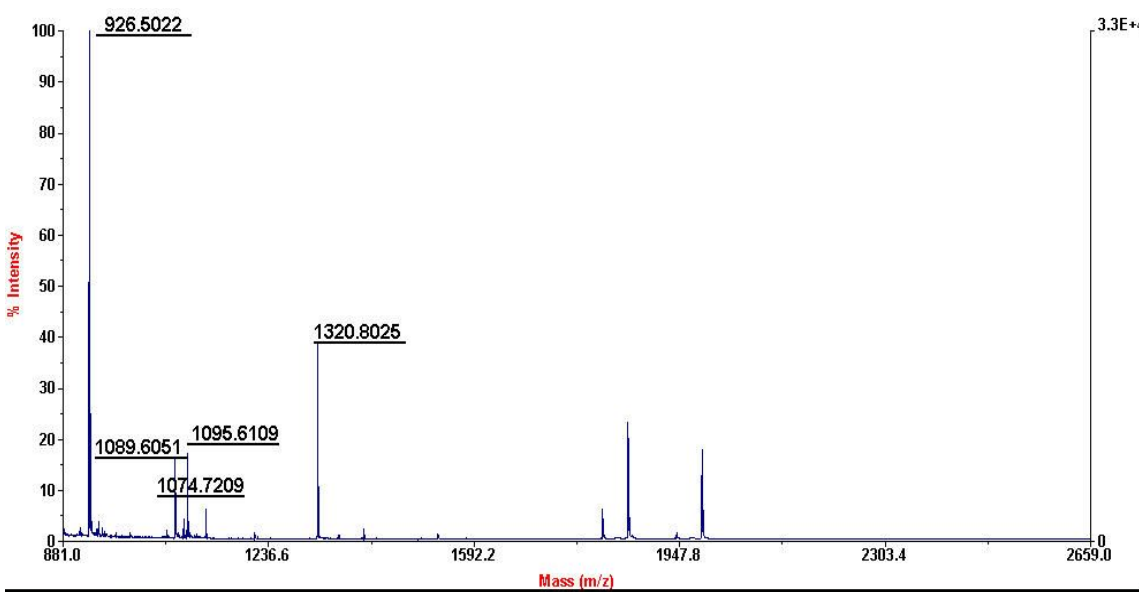

| Start - End | Observed  | Mr(expt)  | Mr(calc)  | Delta  | Miss Sequence |                    |
|-------------|-----------|-----------|-----------|--------|---------------|--------------------|
| 12 - 25     | 1320.8025 | 1319.7952 | 1319.6834 | 0.1118 | 0             | K.GSAPPGPVPEGSIR.I |

|           |           |           |           |        |   |                |
|-----------|-----------|-----------|-----------|--------|---|----------------|
| 31 - 37   | 926.5022  | 925.4950  | 925.4116  | 0.0833 | 0 | R.FCPFAER.T    |
| 58 - 65   | 1095.6109 | 1094.6036 | 1094.5549 | 0.0487 | 0 | K.NKPEWFFK.K   |
| 102 - 110 | 1089.6051 | 1088.5978 | 1088.5390 | 0.0588 | 0 | K.LLPDDPYEK.A  |
| 123 - 132 | 1074.7209 | 1073.7136 | 1073.6233 | 0.0903 | 0 | K.VPSLVGSFIR.S |

No match to: 1813.9972, 1857.9886, 1866.2566, 1968.1782, 1986.0891

### 344 Proteasome activator complex subunit 1

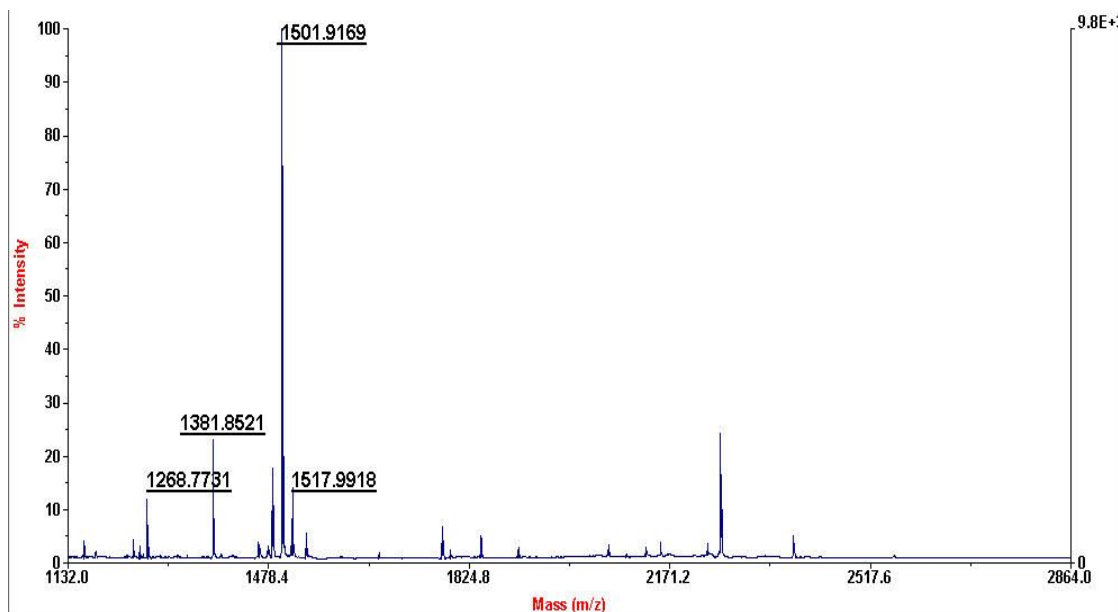

| Start - End | Observed  | Mr(expt)  | Mr(calc)  | Delta  | Miss Sequence        |
|-------------|-----------|-----------|-----------|--------|----------------------|
| 14 - 24     | 1381.8521 | 1380.8448 | 1380.6708 | 0.1741 | 1 K.VDVFREDLCTK.T    |
| 25 - 35     | 1268.7731 | 1267.7658 | 1267.6448 | 0.1210 | 0 K.TENLLGSYFPK.K    |
| 59 - 72     | 1517.9918 | 1516.9846 | 1516.8501 | 0.1345 | 1 K.APLDIPVPDPVKEK.E |
| 191 - 198   | 971.5868  | 970.5795  | 970.4621  | 0.1174 | 0 K.QPHVGDYR.Q       |
| 199 - 210   | 1501.9169 | 1500.9097 | 1500.7208 | 0.1888 | 0 R.QLVHELDEAEYR.D   |

No match to: 1111.7005, 1484.8978, 2258.2733

### 345 Proteasome subunit beta type 7 precursor



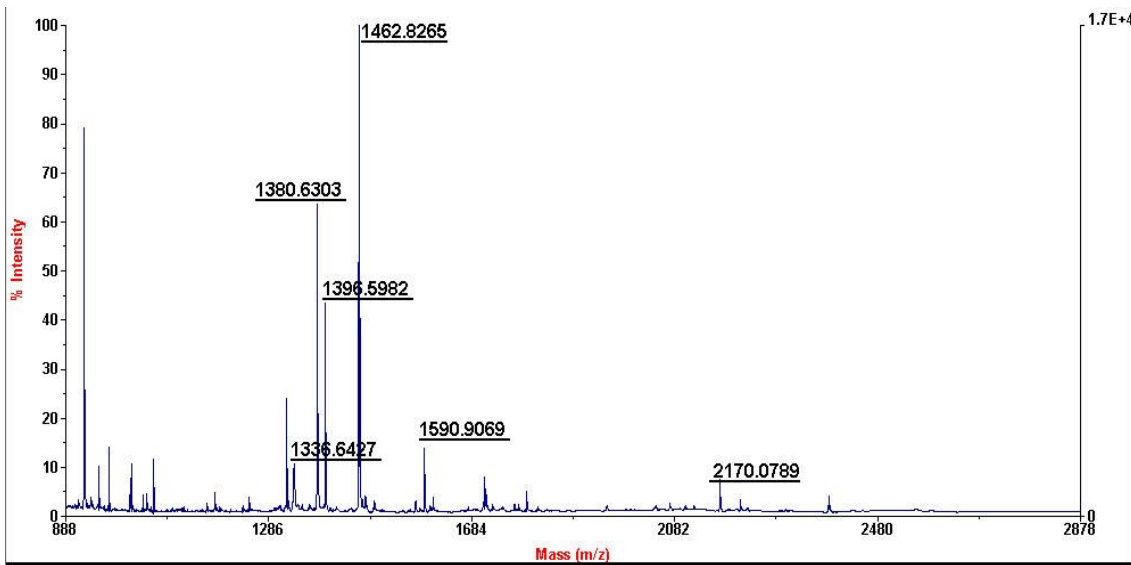

| Start - End | Observed  | Mr(expt)  | Mr(calc)  | Delta   | Miss Sequence                   |
|-------------|-----------|-----------|-----------|---------|---------------------------------|
| 2 - 21      | 2170.0789 | 2169.0716 | 2169.0426 | 0.0290  | 1 M.AAVSVYAPPVGGFSFDNCR.R       |
| 185 - 195   | 1380.6303 | 1379.6230 | 1379.6027 | 0.0203  | 0 K.FRPDMEEEEAK.N               |
| 185 - 195   | 1396.5982 | 1395.5909 | 1395.5976 | -0.0067 | 0 K.FRPDMEEEEAK.N Oxidation (M) |
| 226 - 237   | 1462.8265 | 1461.8193 | 1461.7980 | 0.0213  | 0 K.LDFLRPYTVPNK.K              |
| 226 - 238   | 1590.9069 | 1589.8996 | 1589.8929 | 0.0067  | 1 K.LDFLRPYTVPNKK.G             |
| 247 - 258   | 1336.6427 | 1335.6354 | 1335.6704 | -0.0350 | 1 R.CEKGTTAVLTEK.I              |

No match to: 923.5151, 972.4783, 1014.6009, 1060.5647, 1320.6975, 1708.8095

346 6-phosphogluconolactonase

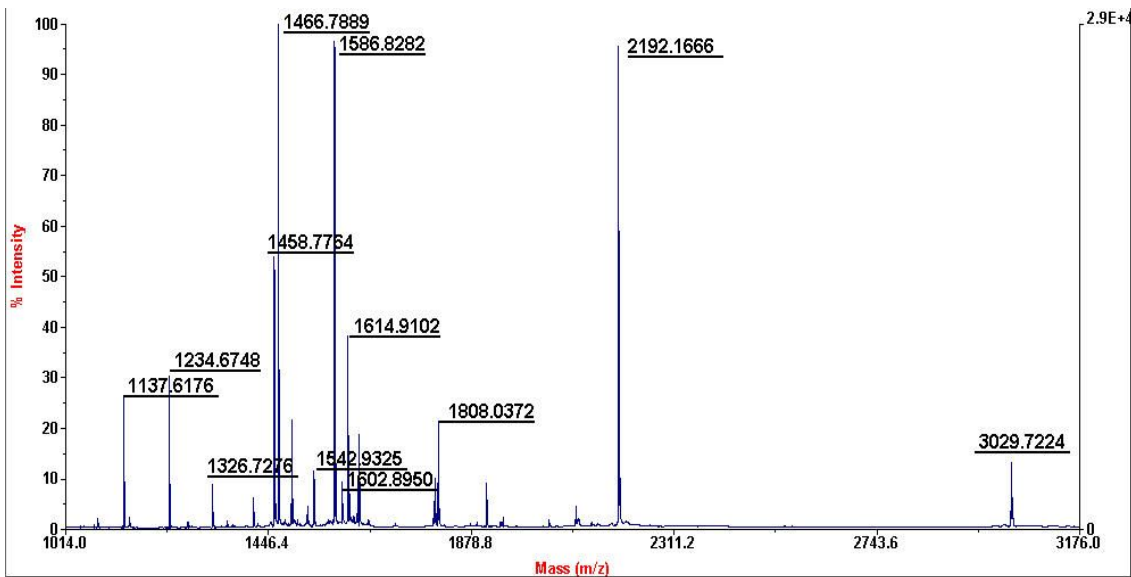

| Start - End | Observed  | Mr(expt)  | Mr(calc)  | Delta  | Miss Sequence          |
|-------------|-----------|-----------|-----------|--------|------------------------|
| 57 - 72     | 1491.0201 | 1490.0128 | 1489.8252 | 0.1875 | 0 R.ELPAAVAPAGPASLAR.W |

|           |           |           |           |        |   |                     |
|-----------|-----------|-----------|-----------|--------|---|---------------------|
| 73 - 81   | 1183.6755 | 1182.6682 | 1182.5128 | 0.1554 | 0 | R.WTLGFCDER.L       |
| 82 - 96   | 1768.0843 | 1767.0770 | 1766.8628 | 0.2143 | 0 | R.LVPFDHAESTYGLYR.T |
| 171 - 185 | 1602.1037 | 1601.0965 | 1600.8937 | 0.2028 | 0 | K.IVAPISDSPKPPPQR.V |
| 236 - 246 | 1351.8167 | 1350.8094 | 1350.6390 | 0.1704 | 0 | K.LCWFLDEAAAR.L     |

No match to: 913.6140, 1734.0173, 2485.7129, 2530.5795, 2546.5592, 2555.4946, 2794.8234

347

NG,NG-dimethylarginine dimethylaminohydrolase 2

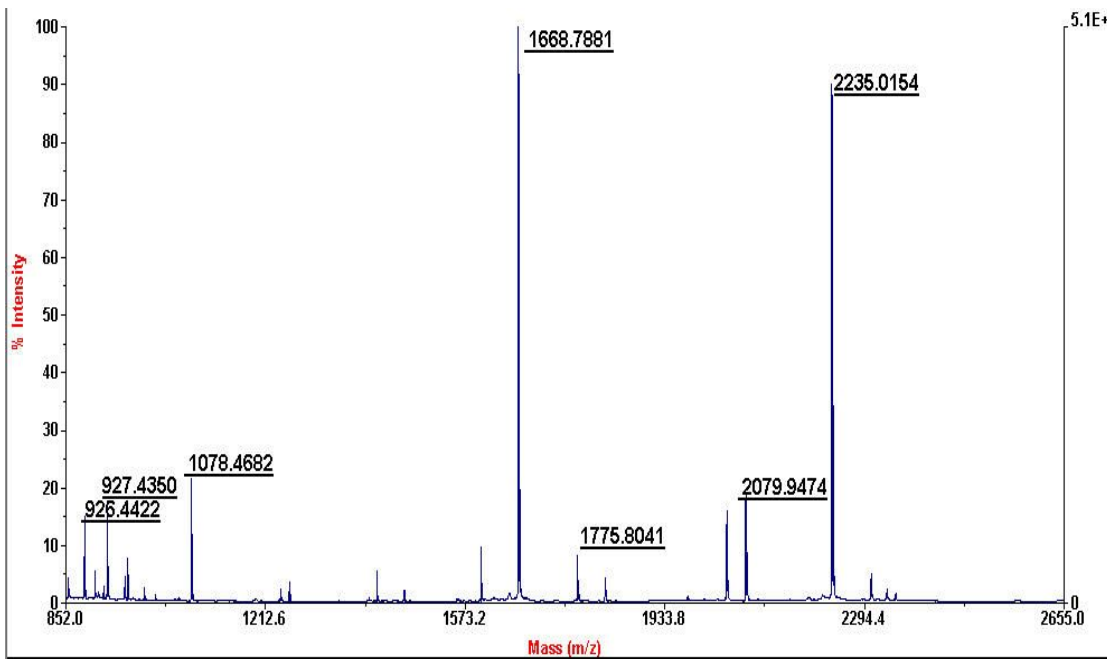

| Start - End | Observed  | Mr(expt)  | Mr(calc)  | Delta   | Miss | Sequence                    |
|-------------|-----------|-----------|-----------|---------|------|-----------------------------|
| 18 - 40     | 2079.9474 | 2078.9402 | 2079.0848 | -0.1446 | 0    | R.GVPESLASGEGAGAGLPALDLAK.A |
| 97 - 104    | 927.4350  | 926.4277  | 926.4934  | -0.0657 | 0    | R.RPEVDGVR.K                |
| 114 - 134   | 2235.0154 | 2234.0081 | 2234.1067 | -0.0986 | 0    | R.IVEIGDENATLDGTDVLFTR.E    |
| 135 - 142   | 926.4422  | 925.4349  | 925.4909  | -0.0560 | 0    | R.EFFVGLSK.W                |
| 148 - 157   | 1078.4682 | 1077.4609 | 1077.5455 | -0.0845 | 0    | R.GAEIVADTFR.D              |
| 158 - 173   | 1668.7881 | 1667.7808 | 1667.8631 | -0.0823 | 0    | R.DFAVSTVPVSGPSHLR.G        |
| 252 - 267   | 1775.8041 | 1774.7968 | 1774.9023 | -0.1055 | 0    | K.LSDVTLVPVSCSELEK.A        |

No match to: 963.4061, 1601.7504, 2044.9446, 2219.6829

348

Cathepsin D precursor

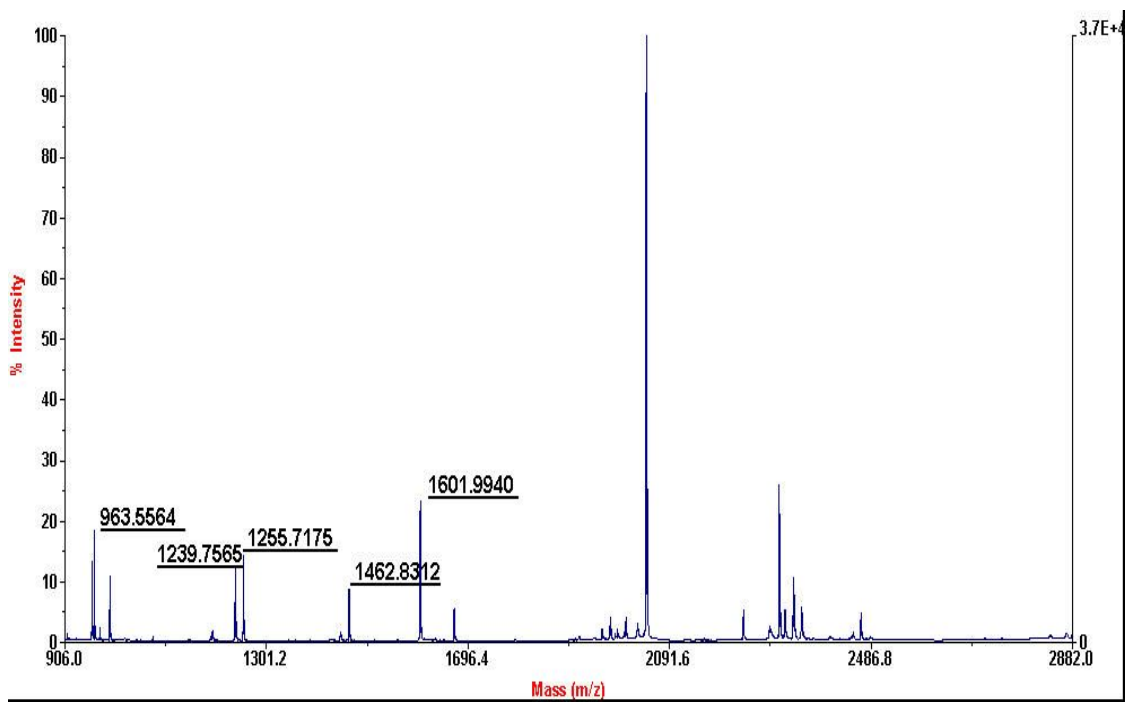

| Start - End | Observed  | Mr(expt)  | Mr(calc)  | Delta  | Miss Sequence                   |
|-------------|-----------|-----------|-----------|--------|---------------------------------|
| 195 - 205   | 1239.7565 | 1238.7492 | 1238.6118 | 0.1374 | 0 K.FDGILGMAYPR.I               |
| 195 - 205   | 1255.7175 | 1254.7102 | 1254.6067 | 0.1035 | 0 K.FDGILGMAYPR.I Oxidation (M) |
| 223 - 235   | 1601.9940 | 1600.9867 | 1600.8249 | 0.1618 | 0 K.LVDQNIQSFYLSR.D             |
| 393 - 399   | 963.5564  | 962.5491  | 962.4498  | 0.0993 | 0 R.YYTVFDR.D                   |
| 393 - 403   | 1462.8312 | 1461.8239 | 1461.6637 | 0.1602 | 1 R.YYTVFDRDNNR.V               |

### 349 F-actin capping protein subunit beta

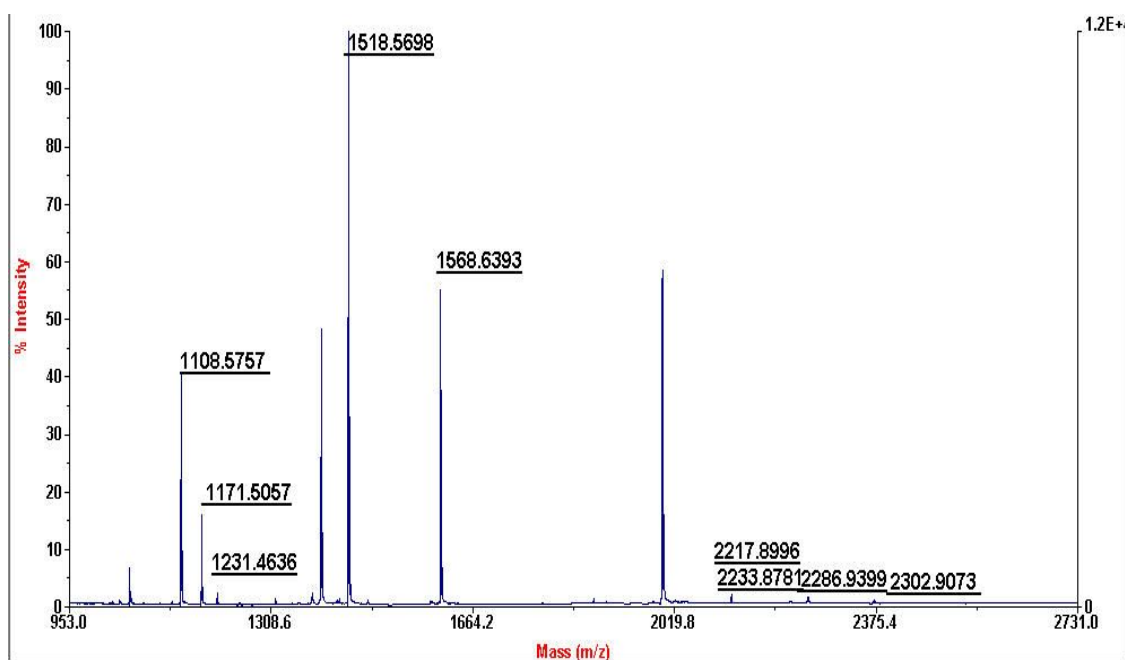

| Start - End   | Observed  | Mr(expt)  | Mr(calc)  | Delta   | Miss Sequence                |
|---------------|-----------|-----------|-----------|---------|------------------------------|
| 15 - 23       | 1108.5757 | 1107.5684 | 1107.6400 | -0.0716 | 1 R.RLPPQIEK.N               |
| 58 - 66       | 1231.4636 | 1230.4563 | 1230.5339 | -0.0776 | 0 K.DYLLCDYNR.D              |
| 73 - 92       | 2217.8996 | 2216.8923 | 2217.0160 | -0.1238 | 1 R.SPWSNKYDPPLDGMPSAR.L     |
| 73 - 92       | 2233.8781 | 2232.8709 | 2233.0110 | -0.1401 | 1 R.SPWSNKYDPPLDGMPSAR.L     |
| Oxidation (M) |           |           |           |         |                              |
| 79 - 92       | 1518.5698 | 1517.5625 | 1517.6820 | -0.1195 | 0 K.YDPPLDGMPSAR.L           |
| 95 - 108      | 1696.7380 | 1695.7307 | 1695.8216 | -0.0909 | 1 R.KLEVEANNAFDQYR.D         |
| 96 - 108      | 1568.6393 | 1567.6321 | 1567.7267 | -0.0946 | 0 K.LEVEANNAFDQYR.D          |
| 146 - 159     | 1685.6864 | 1684.6791 | 1684.7879 | -0.1088 | 0 K.GCWDSIHVVEVQEK.S         |
| 196 - 215     | 2286.9399 | 2285.9326 | 2286.0369 | -0.1043 | 1 R.QMEKDETVSDCSPHIANIGR.L   |
| 196 - 215     | 2302.9073 | 2301.9000 | 2302.0318 | -0.1318 | 1 R.QMEKDETVSDCSPHIANIGR.L ; |
| Oxidation (M) |           |           |           |         |                              |
| 226 - 235     | 1171.5057 | 1170.4984 | 1170.5921 | -0.0936 | 0 R.STLNEIYFGK.T             |

No match to: 1561.7091, 1606.6195, 1622.5874, 2285.9427

### 350 Prohibitin - Homo sapiens

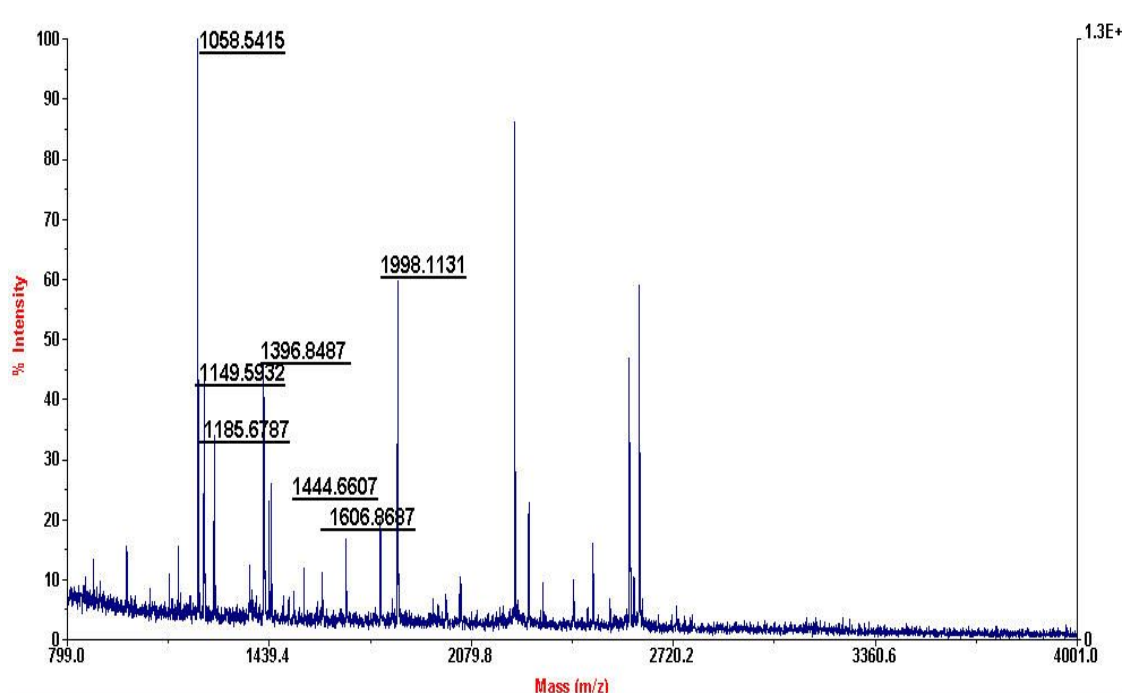

| Start - End | Observed  | Mr(expt)  | Mr(calc)  | Delta  | Miss Sequence              |
|-------------|-----------|-----------|-----------|--------|----------------------------|
| 84 - 93     | 1185.6787 | 1184.6714 | 1184.6513 | 0.0201 | 0 K.DLQNVNITLR.I           |
| 94 - 105    | 1396.8487 | 1395.8414 | 1395.8350 | 0.0064 | 0 R.ILFRPVASQLPR.I         |
| 106 - 117   | 1444.6607 | 1443.6534 | 1443.6518 | 0.0017 | 0 R.IFTSIGEDYDER.V         |
| 134 - 143   | 1149.5932 | 1148.5860 | 1148.5826 | 0.0034 | 0 R.FDAGELITQR.E           |
| 187 - 195   | 1058.5415 | 1057.5342 | 1057.5152 | 0.0190 | 0 K.QVAQQEAER.A            |
| 220 - 239   | 1998.1131 | 1997.1058 | 1997.0793 | 0.0265 | 0 K.AAELIANSLATAGDGLIELR.K |
| 240 - 253   | 1606.8687 | 1605.8614 | 1605.8362 | 0.0252 | 1 R.KLEAAEDIAYQLSR.S       |

No match to: 1379.6959, 1394.7854, 1637.7559, 1982.5520, 2007.4528

### 351 Netrin-1 precursor - Homo sapiens

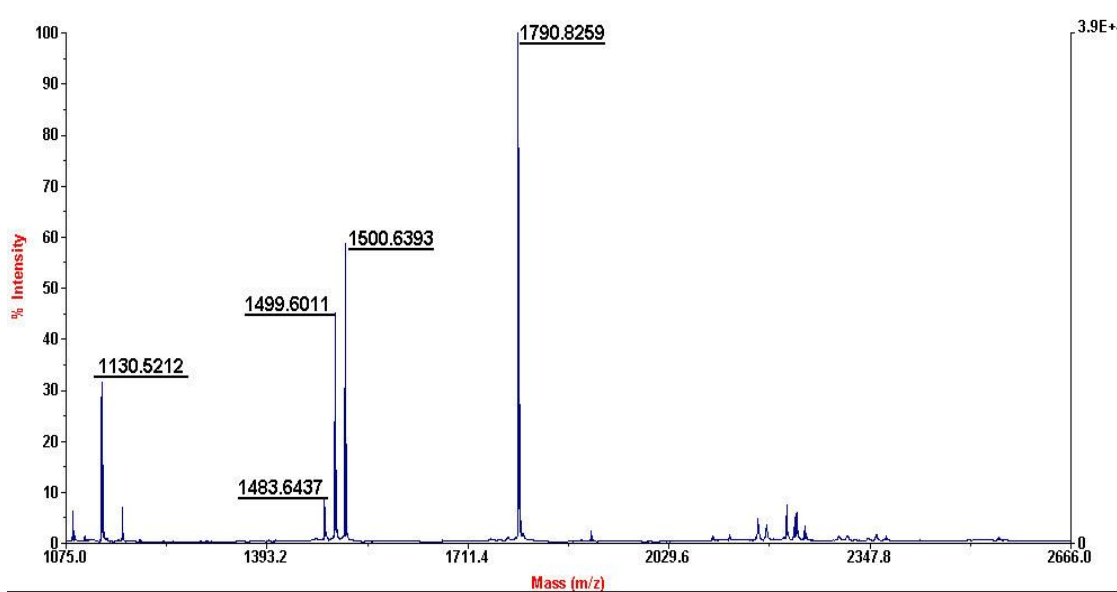

| Start - End | Observed  | Mr(expt)  | Mr(calc)  | Delta   | Miss Sequence                    |
|-------------|-----------|-----------|-----------|---------|----------------------------------|
| 66 - 76     | 1130.5212 | 1129.5139 | 1129.5662 | -0.0523 | 0 R.VSSTCGRPPAR.Y                |
| 88 - 100    | 1500.6393 | 1499.6320 | 1499.6973 | -0.0653 | 1 R.LRSCHLCNASDPK.K              |
| 170 - 183   | 1790.8259 | 1789.8186 | 1789.8610 | -0.0424 | 1 R.TWVPFQFYSTQCRK.M             |
| 184 - 195   | 1499.6011 | 1498.5938 | 1498.7827 | -0.1888 | 1 K.MYNRPHRAPITK.Q Oxidation (M) |
| 352 - 358   | 960.4040  | 959.3967  | 959.4422  | -0.0455 | 0 R.FNMELYK.L Oxidation (M)      |
| 373 - 384   | 1483.6437 | 1482.6364 | 1482.6357 | 0.0007  | 1 R.HNTAGRHCYCK.E                |

No match to: 1132.4907, 1163.5954, 1516.6416

352 Heat-shock protein beta-1

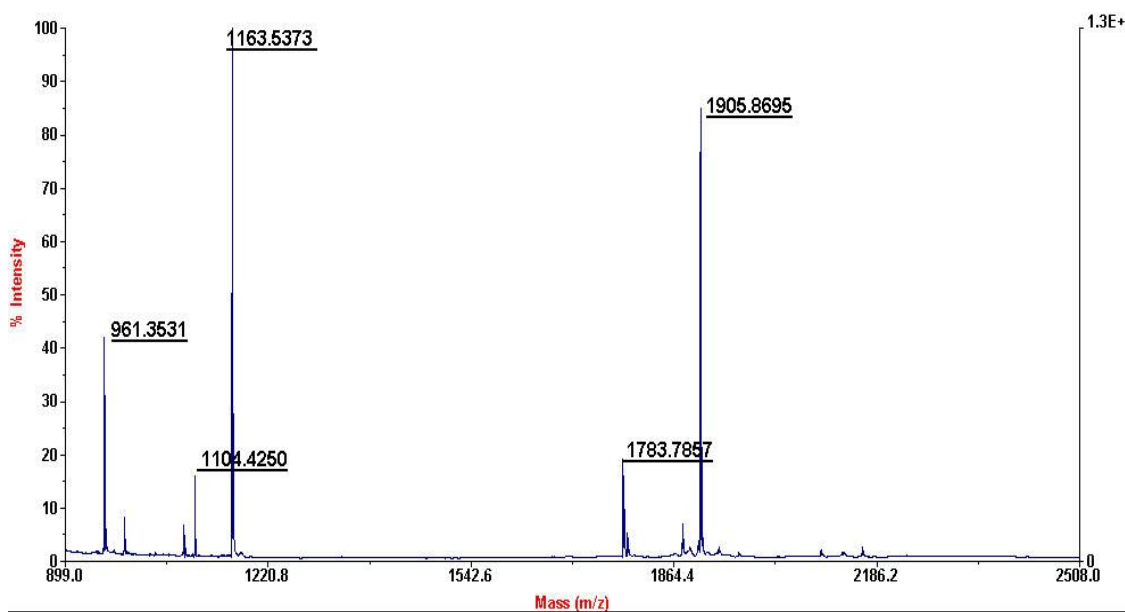

| Start - End | Observed  | Mr(expt)  | Mr(calc)  | Delta   | Miss Sequence           |
|-------------|-----------|-----------|-----------|---------|-------------------------|
| 13 - 20     | 961.3531  | 960.3458  | 960.4454  | -0.0996 | 0 R.GPSWDPFR.D          |
| 21 - 27     | 960.3557  | 959.3484  | 959.4250  | -0.0766 | 0 R.DWYPHSR.L           |
| 28 - 37     | 1163.5373 | 1162.5300 | 1162.6135 | -0.0835 | 0 R.LFDQAFGLPR.L        |
| 97 - 112    | 1783.7857 | 1782.7784 | 1782.9152 | -0.1368 | 0 R.VSLDVNHFAPDELTVK.T  |
| 128 - 136   | 1104.4250 | 1103.4178 | 1103.4996 | -0.0818 | 0 R.QDEHGYISR.C         |
| 172 - 188   | 1905.8695 | 1904.8622 | 1904.9843 | -0.1222 | 0 K.LATQSNEITIPVTFESR.A |

No match to: 993.3502, 1087.4316, 1865.4597, 1877.8835, 1904.8251

353 Rho GDP-dissociation inhibitor 1

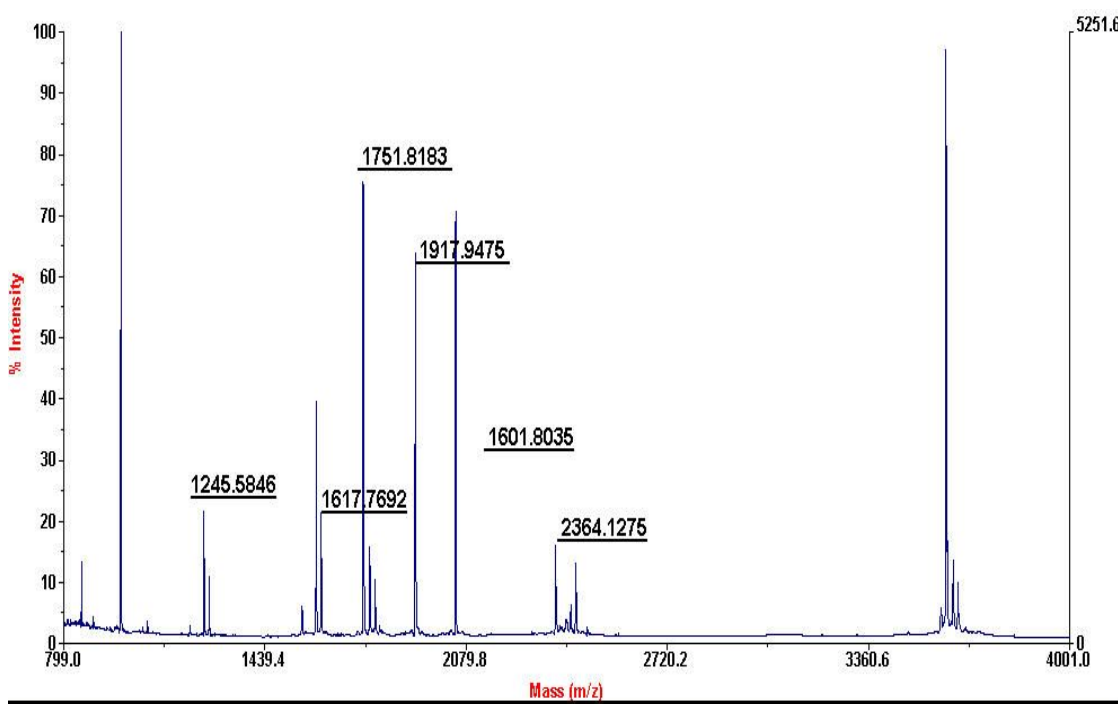

| Start - End | Observed  | Mr(expt)  | Mr(calc)  | Delta   | Miss Sequence                 |
|-------------|-----------|-----------|-----------|---------|-------------------------------|
| 34 - 49     | 1917.9475 | 1916.9402 | 1916.9327 | 0.0075  | 1 K.SIQEIQLDKDDESLR.K         |
| 128 - 134   | 980.5050  | 979.4977  | 979.4875  | 0.0102  | 0 K.YIQHTYR.K                 |
| 139 - 152   | 1601.8035 | 1600.7962 | 1600.7555 | 0.0407  | 1 K.IDKTDYMGVSGPR.A           |
| 139 - 152   | 1617.7692 | 1616.7619 | 1616.7505 | 0.0115  | 1 K.IDKTDYMGVSGPR.A Oxidation |
| (M)         |           |           |           |         |                               |
| 142 - 152   | 1245.5846 | 1244.5773 | 1244.5496 | 0.0277  | 0 K.TDYMGVSGPR.A              |
| 153 - 167   | 1751.8183 | 1750.8110 | 1750.8301 | -0.0191 | 0 R.AEEYEFLTPVEEAPK.G         |
| 181 - 199   | 2364.1275 | 2363.1202 | 2363.1070 | 0.0133  | 1 R.FTDDDKTDHLSWEWNLTIK.K     |

No match to: 1557.2394, 2046.0488, 2428.1168

354 Heme-binding protein 2

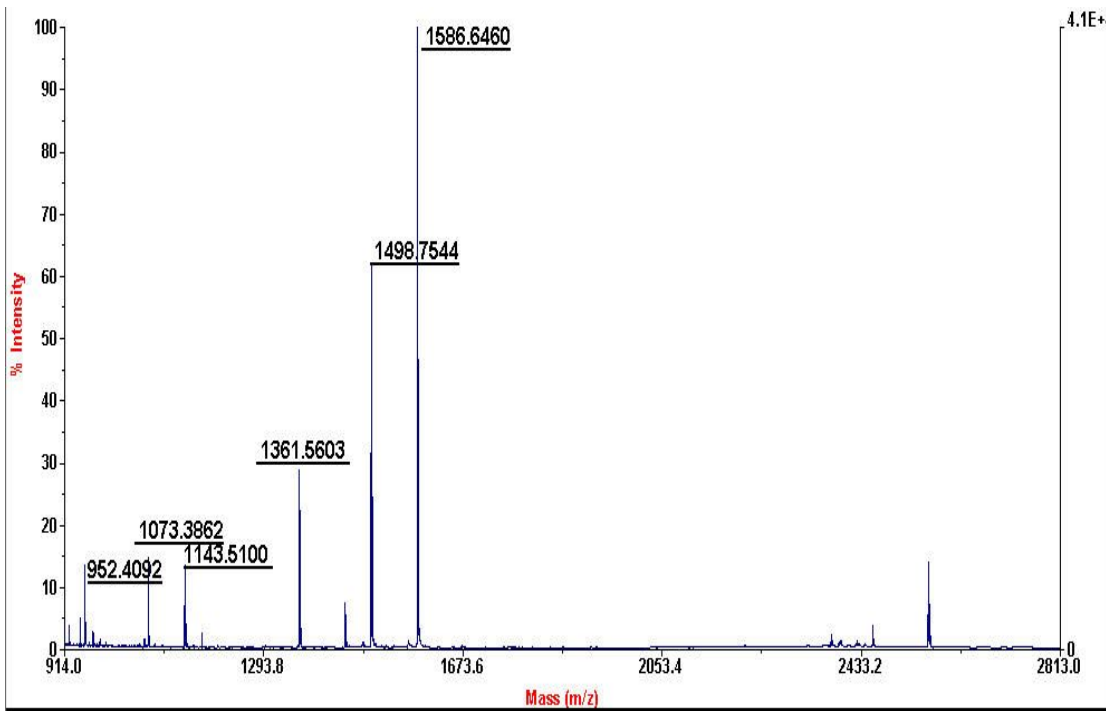

| Start - End | Observed  | Mr(expt)  | Mr(calc)  | Delta   | Miss Sequence         |
|-------------|-----------|-----------|-----------|---------|-----------------------|
| 27 - 41     | 1586.6460 | 1585.6387 | 1585.7372 | -0.0985 | 0 K.APEDAGPQPGSYEIR.H |
| 133 - 140   | 952.4092  | 951.4020  | 951.4848  | -0.0828 | 0 R.AEMTVFVR.S        |
| 141 - 150   | 1073.3862 | 1072.3789 | 1072.4825 | -0.1036 | 0 R.SFDGFSSAQK.N      |
| 151 - 163   | 1498.7544 | 1497.7471 | 1497.8515 | -0.1044 | 0 K.NQEQLLTLASILR.E   |
| 173 - 184   | 1361.5603 | 1360.5530 | 1360.6663 | -0.1133 | 0 K.VYYTAGYNSPVK.L    |
| 189 - 197   | 1143.5100 | 1142.5027 | 1142.6084 | -0.1056 | 0 R.NNEVWLIQK.N       |

No match to: 943.4850, 1449.5172, 2561.0736

355 Tropomyosin alpha-4 chain



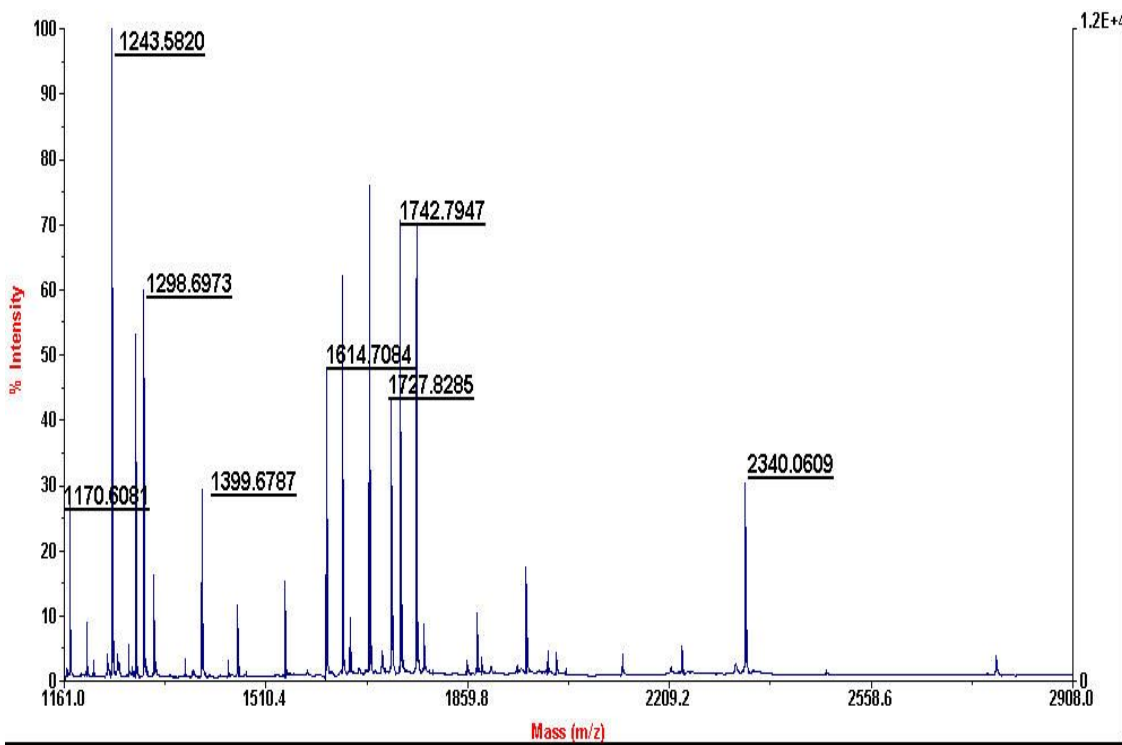

| Start - End | Observed  | Mr(expt)  | Mr(calc)  | Delta   | Miss Sequence            |
|-------------|-----------|-----------|-----------|---------|--------------------------|
| 13 - 27     | 1742.7947 | 1741.7875 | 1741.8595 | -0.0720 | 1 R.KIQALQQQADEAEDR.A    |
| 14 - 27     | 1614.7084 | 1613.7011 | 1613.7645 | -0.0634 | 0 K.IQALQQQADEAEDR.A     |
| 55 - 65     | 1399.6787 | 1398.6714 | 1398.7467 | -0.0752 | 1 R.RIQLVEEELDR.A        |
| 56 - 65     | 1243.5820 | 1242.5748 | 1242.6456 | -0.0708 | 0 R.IQLVEEELDR.A         |
| 56 - 69     | 1727.8285 | 1726.8212 | 1726.8849 | -0.0637 | 1 R.IQLVEEELDRAQER.L     |
| 132 - 142   | 1298.6973 | 1297.6900 | 1297.7605 | -0.0705 | 1 R.KLVILEGELER.A        |
| 133 - 142   | 1170.6081 | 1169.6009 | 1169.6656 | -0.0647 | 0 K.LVILEGELER.A         |
| 229 - 248   | 2340.0609 | 2339.0536 | 2339.1063 | -0.0527 | 0 K.EENVGLHQTLTDLNCLNCL- |

No match to: 1284.6673, 1543.6975, 1642.7373, 1688.7293, 1689.7067, 1770.8102, 1960.9501

356 Guanine nucleotide-binding protein alpha-15 subunit

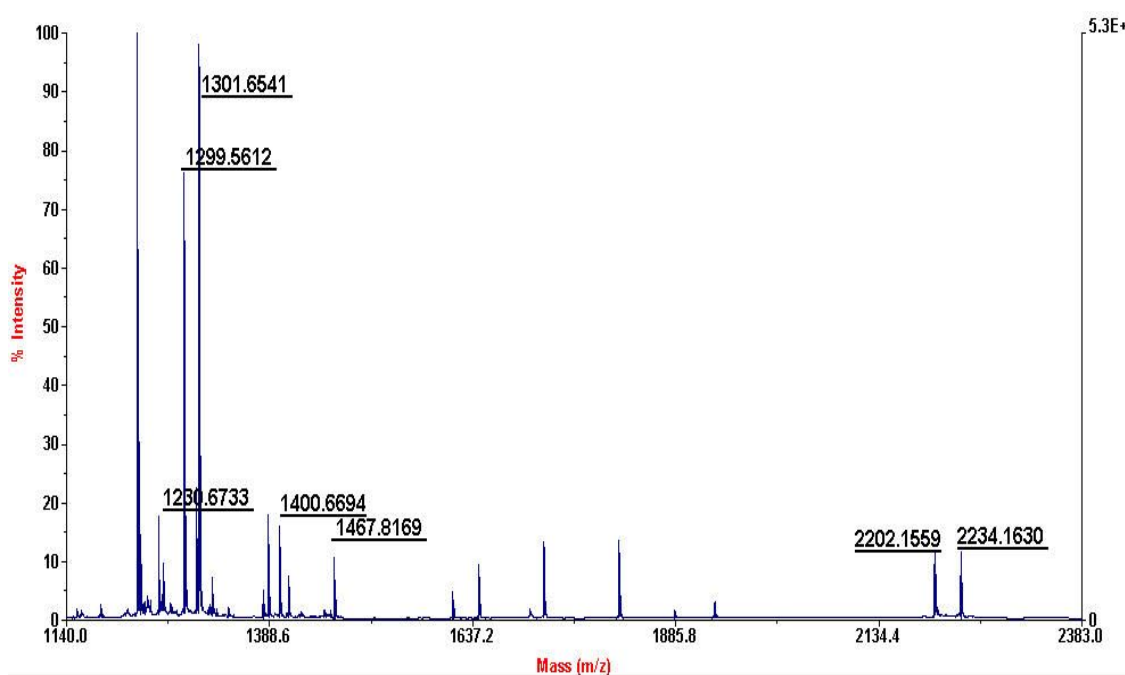

| Start - End   | Observed  | Mr(expt)  | Mr(calc)  | Delta   | Miss Sequence                   |
|---------------|-----------|-----------|-----------|---------|---------------------------------|
| 100 - 110     | 1301.6541 | 1300.6468 | 1300.7139 | -0.0671 | 0 R.LQIPFSRPESK.H               |
| 111 - 129     | 2234.1630 | 2233.1557 | 2233.0838 | 0.0719  | 1 K.HHASLVMSQDPYKVTTFEK.R       |
| Oxidation (M) |           |           |           |         |                                 |
| 130 - 140     | 1467.8169 | 1466.8096 | 1466.7241 | 0.0856  | 1 K.RYAAAMQWLWR.D Oxidation (M) |
| 187 - 205     | 2202.1559 | 2201.1486 | 2201.0609 | 0.0877  | 1 R.MPTTGINEYCFSVQKTNLR.I       |
| 202 - 213     | 1299.5612 | 1298.5539 | 1298.7307 | -0.1767 | 1 K.TNLRIVDVGQK.S               |
| 310 - 318     | 1230.6733 | 1229.6661 | 1229.6227 | 0.0434  | 1 K.RFILDMYTR.M Oxidation (M)   |
| 319 - 331     | 1400.6694 | 1399.6621 | 1399.5748 | 0.0873  | 0 R.MYTGCVDGPEGSK.K             |

No match to: 1226.5516, 1252.6184, 1283.5880, 1386.7171, 1644.7983, 1723.9666, 1815.8812

357 Heat shock protein HSP 90-beta

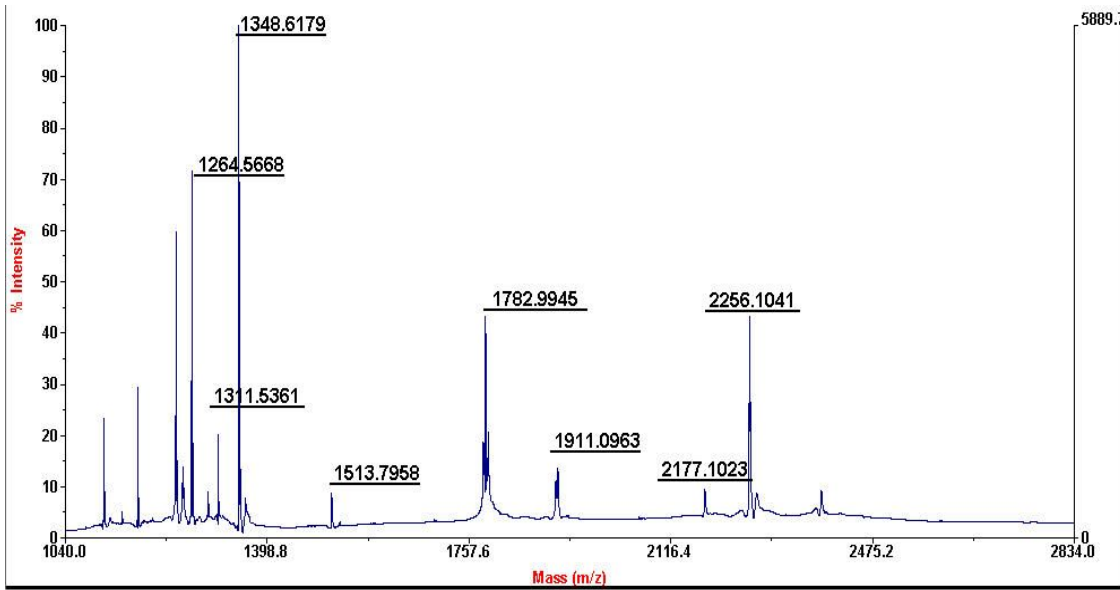

| Start - End | Observed  | Mr(expt)  | Mr(calc)  | Delta   | Miss Sequence                  |
|-------------|-----------|-----------|-----------|---------|--------------------------------|
| 149 - 168   | 2256.1041 | 2255.0968 | 2254.9515 | 0.1453  | 0 K.HNDDEQYAWESSAGGSFTVR.A     |
| 187 - 196   | 1311.5361 | 1310.5289 | 1310.5626 | -0.0338 | 0 K.EDQTEYLEER.R               |
| 320 - 330   | 1348.6179 | 1347.6106 | 1347.6571 | -0.0465 | 0 K.HFSVEGQLEFR.A              |
| 379 - 392   | 1513.7958 | 1512.7885 | 1512.7783 | 0.0102  | 0 R.GVVDSIDLPLNISR.E           |
| 457 - 475   | 2177.1023 | 2176.0950 | 2175.9378 | 0.1571  | 0 R.YHTSQSGDEMTSLSEYVSR.M      |
| 613 - 623   | 1264.5668 | 1263.5595 | 1263.4933 | 0.0661  | 0 R.DNSTMGYMAK.K Oxidation (M) |
| 624 - 639   | 1911.0963 | 1910.0890 | 1910.0374 | 0.0516  | 1 K.KHLEINPDHPIVETLR.Q         |
| 625 - 639   | 1782.9945 | 1781.9872 | 1781.9424 | 0.0448  | 0 K.HLEINPDHPIVETLR.Q          |

No match to: 1108.4895, 1168.4961, 1235.5470, 1786.9979

358 Kaptin

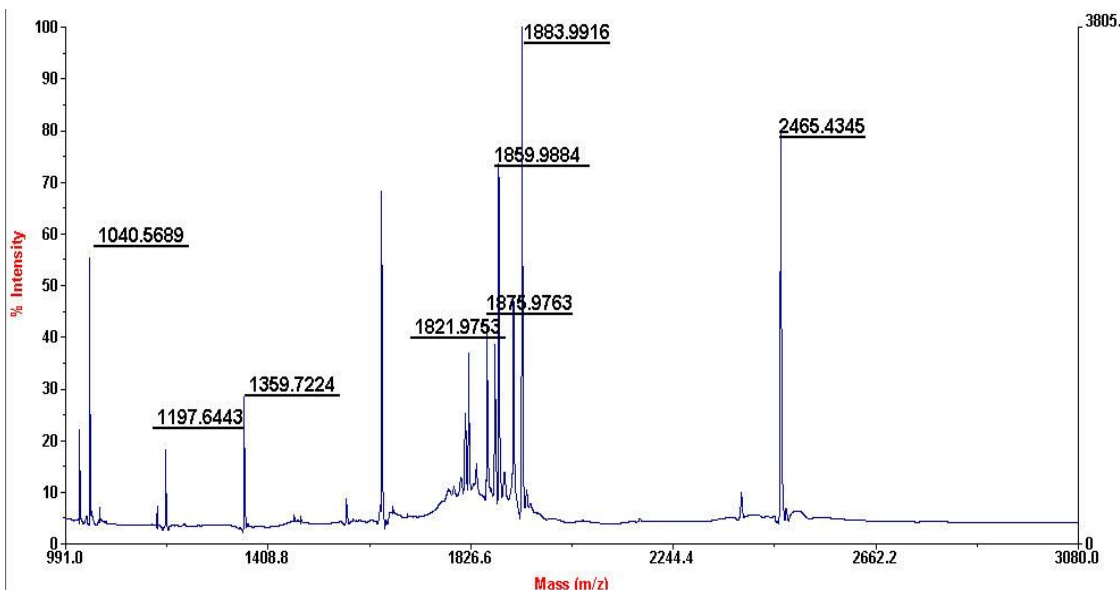

| Start - End | Observed  | Mr(expt)  | Mr(calc)  | Delta   | Miss Sequence                 |           |
|-------------|-----------|-----------|-----------|---------|-------------------------------|-----------|
| 33 - 43     | 1197.6443 | 1196.6370 | 1196.6401 | -0.0031 | 0 R.LDIDSPPITAR.N             |           |
| 44 - 56     | 1359.7224 | 1358.7151 | 1358.6976 | 0.0175  | 0 R.NTGIICTIGPASR.S           |           |
| 74 - 89     | 1883.9916 | 1882.9843 | 1882.8962 | 0.0881  | 0 R.LNFSHGTHEYHAETIK.N        |           |
| 93 - 115    | 2465.4345 | 2464.4272 | 2464.2849 | 0.1423  | 0 R.TATESFASDPILYRPVAVALDTK.G |           |
| 231 - 246   | 1859.9884 | 1858.9811 | 1858.8923 | 0.0888  | 0 K.FGVEQDVMVFASFIR.K         |           |
| 231 - 246   | 1875.9763 | 1874.9690 | 1874.8872 | 0.0818  | 0 K.FGVEQDVMVFASFIR.K         | Oxidation |
| (M)         |           |           |           |         |                               |           |
| 248 - 256   | 1040.5689 | 1039.5616 | 1039.5410 | 0.0206  | 1 K.ASDVHEVRK.V               |           |
| 271 - 278   | 953.4893  | 952.4820  | 952.4726  | 0.0094  | 0 K.IENHEGVR.R                |           |
| 279 - 294   | 1821.9753 | 1820.9680 | 1820.9090 | 0.0590  | 1 R.RFDEILEASDGIMVAR.G        |           |
| 279 - 294   | 1837.9696 | 1836.9623 | 1836.9039 | 0.0584  | 1 R.RFDEILEASDGIMVAR.G        | Oxidation |
| (M)         |           |           |           |         |                               |           |
| 280 - 294   | 1665.8717 | 1664.8644 | 1664.8079 | 0.0565  | 0 R.FDEILEASDGIMVAR.G         |           |
| 368 - 376   | 1019.5242 | 1018.5170 | 1018.5083 | 0.0086  | 0 K.GDYPLEAVR.M               |           |
| 384 - 399   | 1932.0815 | 1931.0742 | 1930.9788 | 0.0954  | 0 R.EAEAAIYHLQLFEELR.R        |           |
| 476 - 489   | 1642.8189 | 1641.8116 | 1641.7634 | 0.0482  | 0 K.DPVQEAWAEDVDLR.V          |           |

No match to: 1033.6079, 1179.6230, 1570.7916, 1914.0799

359 Nicotinate-nucleotide pyrophosphorylase

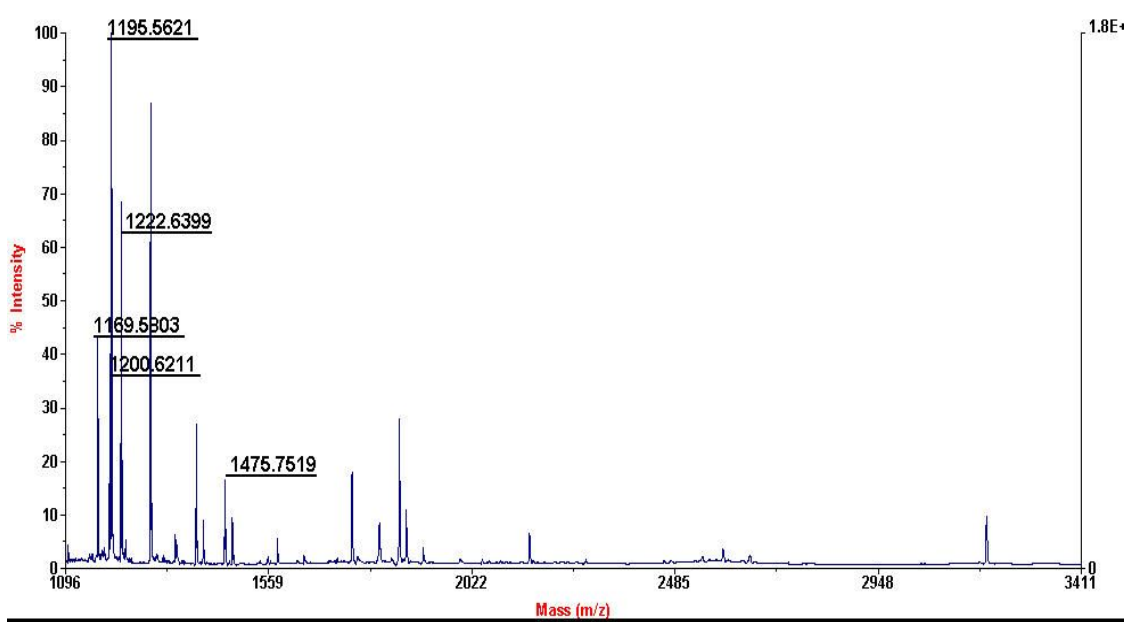

| Start - End | Observed  | Mr(expt)  | Mr(calc)  | Delta   | Miss Sequence         |
|-------------|-----------|-----------|-----------|---------|-----------------------|
| 92 - 102    | 1222.6399 | 1221.6327 | 1221.6288 | 0.0039  | 0 R.GPAHCLLLGER.V     |
| 111 - 126   | 1475.7519 | 1474.7446 | 1474.7198 | 0.0249  | 0 R.CSGIASAAAAVEAAR.G |
| 127 - 138   | 1169.5803 | 1168.5730 | 1168.5737 | -0.0007 | 0 R.GAGWTGHVAGTR.K    |
| 150 - 161   | 1200.6211 | 1199.6139 | 1199.6410 | -0.0272 | 0 K.YGLLVGGAASHR.Y    |
| 172 - 183   | 1195.5621 | 1194.5549 | 1194.5992 | -0.0444 | 0 K.DNHVVAAGGVEK.A    |

No match to: 1289.5931, 1393.5964, 1458.7245, 1748.9066, 1855.9294, 1871.9182

### 360 Integrin-linked protein kinase

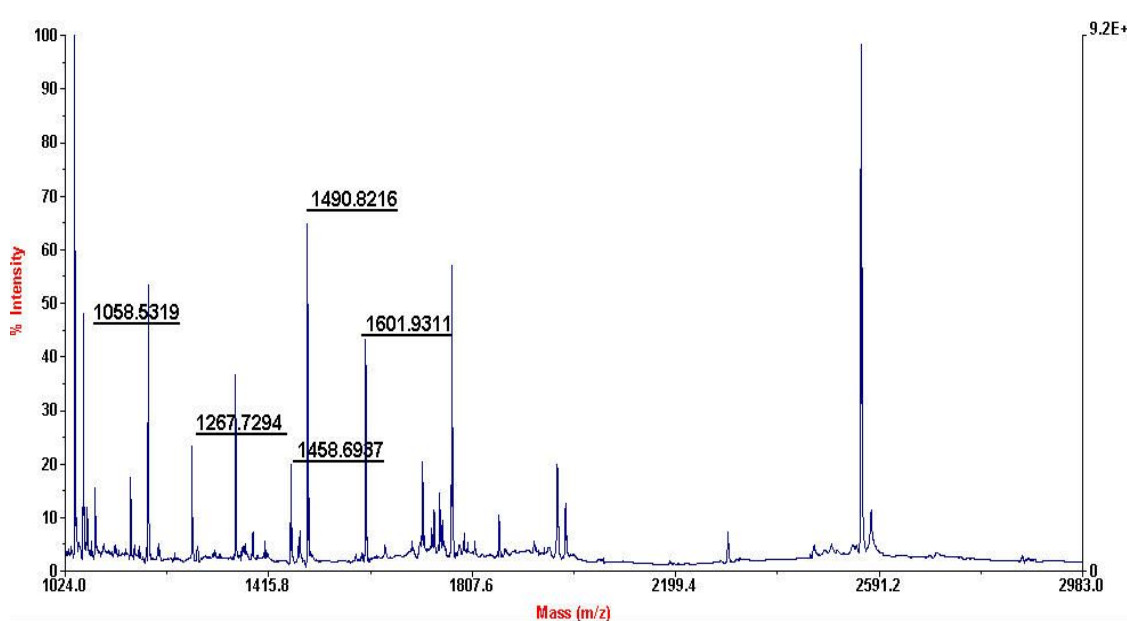

| Start - End | Observed  | Mr(expt)  | Mr(calc)  | Delta  | Miss Sequence       |
|-------------|-----------|-----------|-----------|--------|---------------------|
| 44 - 56     | 1490.8216 | 1489.8143 | 1489.7744 | 0.0399 | 1 R.EGRSAVVEMLIMR.G |

|           |           |           |           |         |   |                   |               |
|-----------|-----------|-----------|-----------|---------|---|-------------------|---------------|
| 212 - 220 | 1058.5319 | 1057.5246 | 1057.5556 | -0.0310 | 0 | R.WQGNDIVVK.V     |               |
| 324 - 334 | 1267.7294 | 1266.7221 | 1266.5584 | 0.1637  | 0 | R.SVMIDEDMTAR.I   |               |
| 342 - 349 | 998.2748  | 997.2675  | 997.4440  | -0.1764 | 0 | K.FSFQCPGR.M      |               |
| 427 - 438 | 1458.6937 | 1457.6865 | 1457.7119 | -0.0254 | 1 | K.ICMNEDPAKRPK.F  |               |
| 436 - 448 | 1601.9311 | 1600.9238 | 1600.9010 | 0.0228  | 1 | K.RPKFDMIVPILEK.M | Oxidation (M) |

No match to: 913.4206, 1042.5545, 1183.4828, 1351.6520, 1767.9243, 1971.0707, 2555.4199

### 361 Kelch-like protein 15

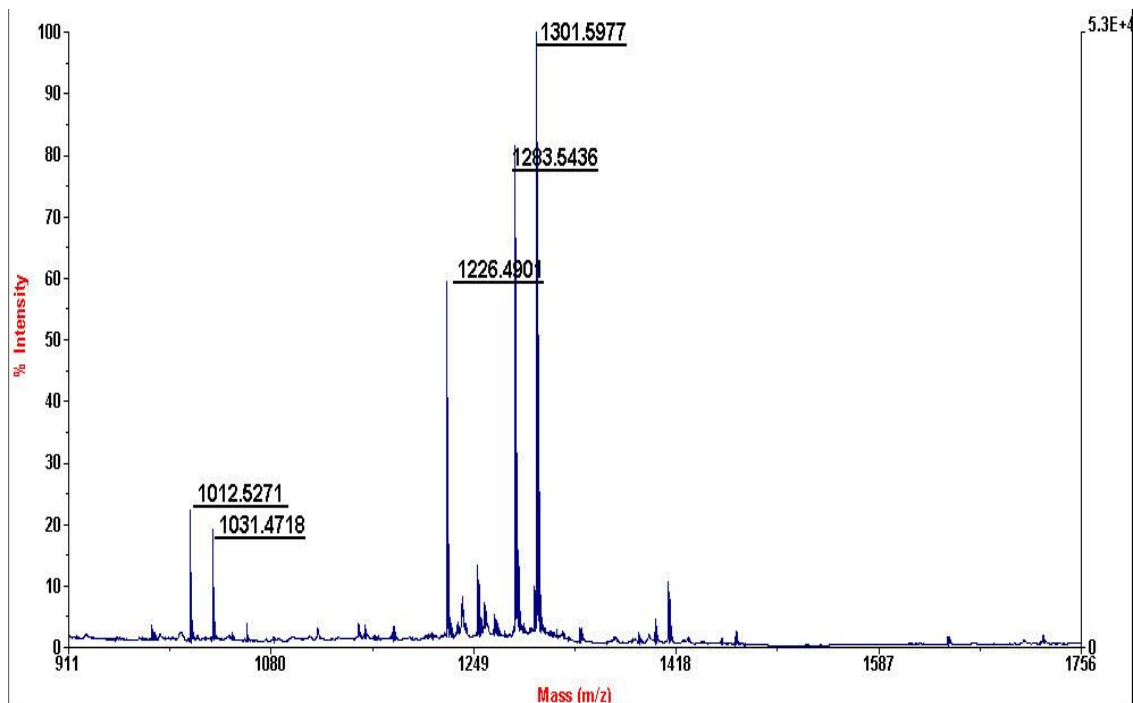

| Start - End | Observed  | Mr(expt)  | Mr(calc)  | Delta   | Miss Sequence     |                 |
|-------------|-----------|-----------|-----------|---------|-------------------|-----------------|
| 58 - 67     | 1301.5977 | 1300.5904 | 1300.5904 | 0.0001  | 1 R.IMFTADMRRER.D | 2 Oxidation (M) |
| 119 - 127   | 1031.4718 | 1030.4646 | 1030.4980 | -0.0334 | 0 K.FCCSFLAK.I    |                 |
| 474 - 482   | 1226.4901 | 1225.4828 | 1225.5484 | -0.0657 | 1 K.MNYARCFHK.M   |                 |
| 533 - 542   | 1012.5271 | 1011.5198 | 1011.5349 | -0.0151 | 0 R.SGHGVTVLTK.Q  |                 |
| 572 - 581   | 1283.5436 | 1282.5363 | 1282.5322 | 0.0042  | 1 K.EDEYPRMPCK.L  | Oxidation (M)   |

No match to: 1252.5429, 1411.6308

362 Proteasome activator complex subunit

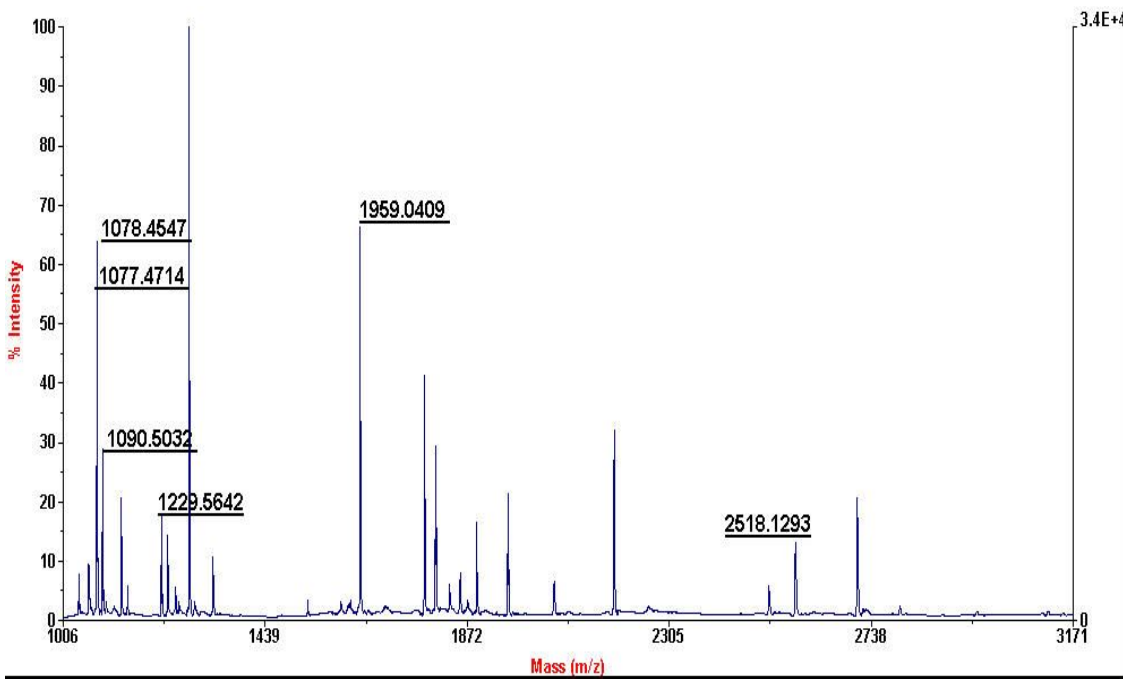

| Start - End | Observed  | Mr(expt)  | Mr(calc)  | Delta   | Miss Sequence                |
|-------------|-----------|-----------|-----------|---------|------------------------------|
| 2 - 12      | 1229.5642 | 1228.5569 | 1228.7027 | -0.1458 | 1 M.ASLLKVDQEVK.L            |
| 38 - 46     | 1077.4714 | 1076.4641 | 1076.6117 | -0.1476 | 0 K.LLELDSFLK.E              |
| 89 - 110    | 2518.1293 | 2517.1220 | 2517.1589 | -0.0369 | 1 R.LDECEEAFQGTKVFVMPNGMLK.S |

2 Oxidation (M)

|           |           |           |           |         |                        |
|-----------|-----------|-----------|-----------|---------|------------------------|
| 196 - 203 | 1078.4547 | 1077.4475 | 1077.4879 | -0.0405 | 0 K.YPHVEDYR.R         |
| 204 - 212 | 1090.5032 | 1089.4959 | 1089.5666 | -0.0707 | 1 R.RTVTEIDEK.E        |
| 226 - 241 | 1959.0409 | 1958.0336 | 1958.0295 | 0.0041  | 1 R.NQYVTLHDMILKNIEK.I |

No match to: 922.3591, 1060.0781, 1130.5310, 1143.5737, 1216.5976, 1275.6383, 1326.7217, 1641.8707, 1779.7589, 1803.9518, 1855.9754, 1891.8696

363 Rho GTPase-activating protein 25

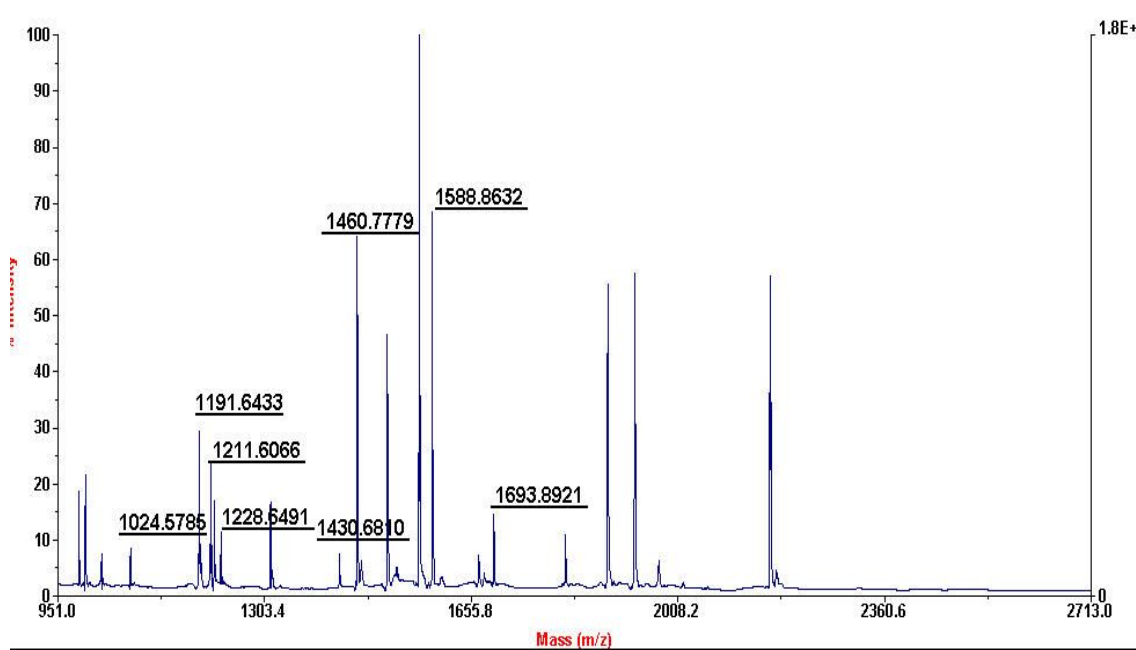

| Start - End | Observed  | Mr(expt)  | Mr(calc)  | Delta   | Miss Sequence                    |
|-------------|-----------|-----------|-----------|---------|----------------------------------|
| 142 - 153   | 1191.6433 | 1190.6360 | 1190.5866 | 0.0494  | 0 R.VAGTPCGVFGQR.L               |
| 327 - 340   | 1693.8921 | 1692.8848 | 1692.8473 | 0.0375  | 1 R.GTPQIQRVMTMMIR.D 2 Oxidation |
| (M)         |           |           |           |         |                                  |
| 417 - 426   | 1211.6066 | 1210.5993 | 1210.6458 | -0.0465 | 1 K.VPREKPGDWK.M                 |
| 440 - 454   | 1588.8632 | 1587.8559 | 1587.7715 | 0.0844  | 1 R.KCFLTSAFQGANSK.M             |
| 441 - 454   | 1460.7779 | 1459.7706 | 1459.6765 | 0.0941  | 0 K.CFLTSAFQGANSK.M              |
| 521 - 535   | 1430.6810 | 1429.6737 | 1429.6685 | 0.0053  | 0 K.GDTLASPNSSETGPGK.K           |
| 574 - 581   | 1024.5785 | 1023.5712 | 1023.4661 | 0.1051  | 0 K.ENYDVWAK.V                   |
| 582 - 591   | 1228.6491 | 1227.6418 | 1227.6822 | -0.0404 | 1 K.VVRLNEELEK.E                 |

No match to: 986.5365, 997.5420, 1074.5835, 1217.6602, 1313.6607, 1512.7829, 1566.8087, 1816.0262, 1888.0091, 1934.0573, 2165.0424

364 Rho-related GTP-binding protein RhoQ



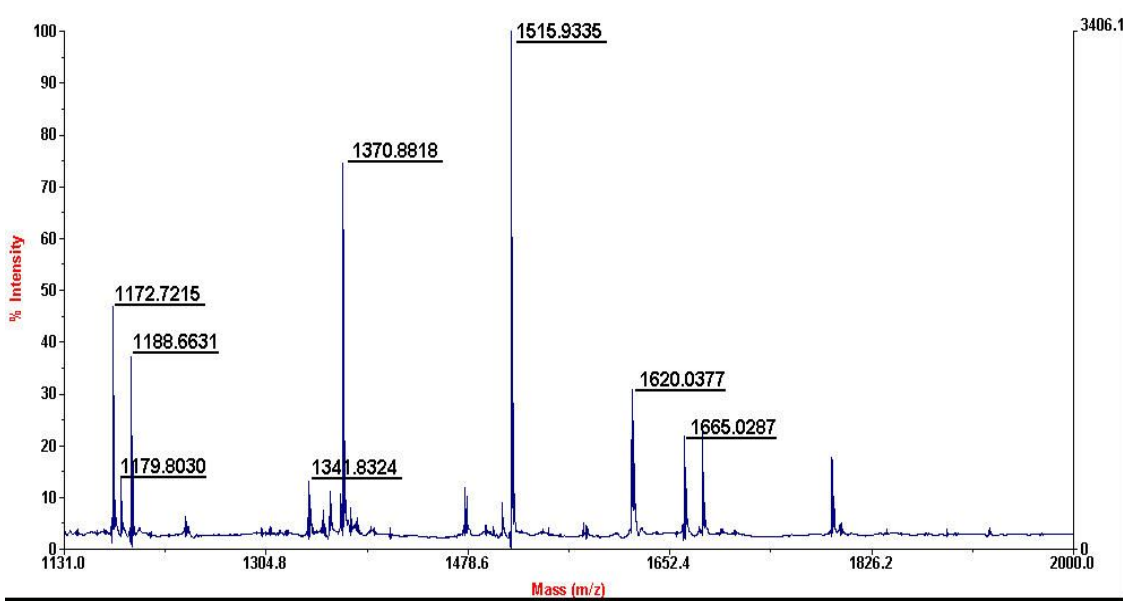

Start - End

| Observed      | Mr(expt)  | Mr(calc)  | Delta     | Miss Sequence |                               |
|---------------|-----------|-----------|-----------|---------------|-------------------------------|
| 1 - 22        | 2126.1435 | 2125.1362 | 2125.0845 | 0.0517        | 1 -.MAHGPGALMLKCVVVG DGAVGK.T |
| Oxidation (M) |           |           |           |               |                               |
| 140 - 153     | 1570.9359 | 1569.9286 | 1569.8548 | 0.0738        | 1 K.EKPICVEQGQKLAK.E          |
| 154 - 172     | 2187.0828 | 2186.0756 | 2186.0169 | 0.0586        | 1 K.EIGACCYVECSALTQKGLK.T 3   |
| 194 - 205     | 1295.6677 | 1294.6604 | 1294.6196 | 0.0409        | 1 R.IGSRCINCLIT.-             |

No match to: 1093.4995, 1254.5586, 1323.6140

### 365 Cysteine and glycine-rich protein 2

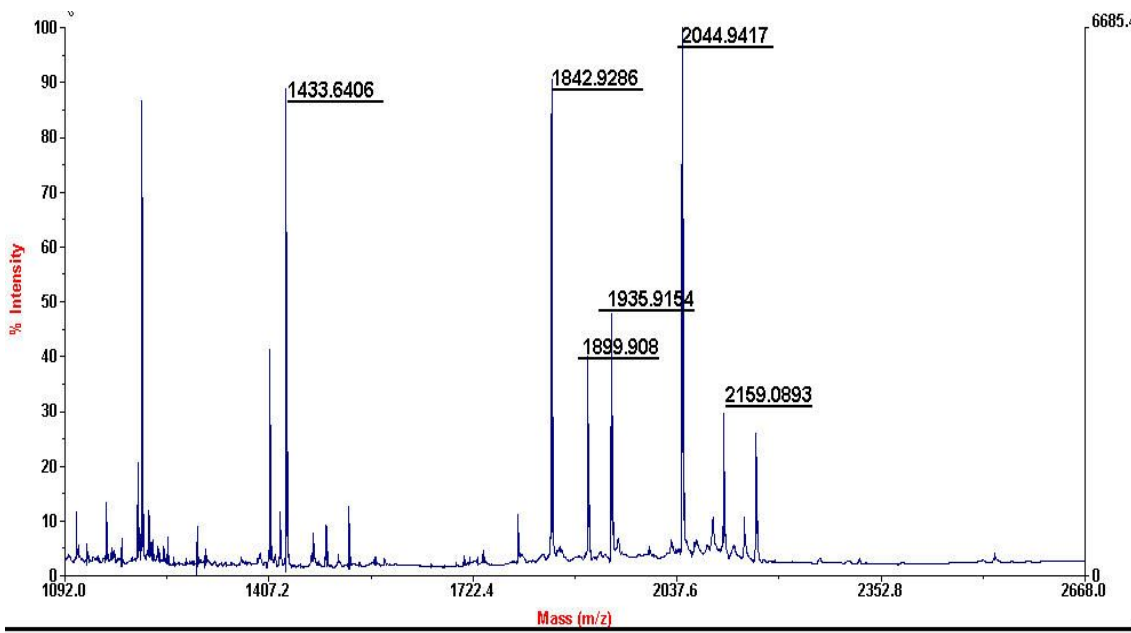

| Start - End | Observed | Mr(expt) | Mr(calc) | Delta | Miss Sequence |
|-------------|----------|----------|----------|-------|---------------|
|-------------|----------|----------|----------|-------|---------------|

|           |           |           |           |         |   |                            |
|-----------|-----------|-----------|-----------|---------|---|----------------------------|
| 16 - 32   | 2044.9417 | 2043.9344 | 2043.8996 | 0.0349  | 0 | K.TVYFAEEVQCEGNSFHK.S      |
| 43 - 59   | 1935.9154 | 1934.9082 | 1934.9043 | 0.0038  | 0 | K.NLDSTTVAVHGEEIYCK.S      |
| 70 - 91   | 2159.0893 | 2158.0820 | 2158.0541 | 0.0279  | 1 | K.GYGYGQGAGTLSTDKGESLGIK.H |
| 92 - 108  | 1842.9286 | 1841.9213 | 1841.8768 | 0.0445  | 0 | K.HEEAPGHRPTTNPASK.F       |
| 152 - 168 | 1899.9082 | 1898.9009 | 1898.8931 | 0.0078  | 1 | K.GLESTTLADKDGEEIYCK.G     |
| 179 - 193 | 1433.6406 | 1432.6334 | 1432.6734 | -0.0401 | 0 | K.GFGFGQGAGALVHSE.-        |

No match to: 1059.9851, 1210.5147, 1408.6522, 2109.1015

### 367 Adenylate cyclase type 5

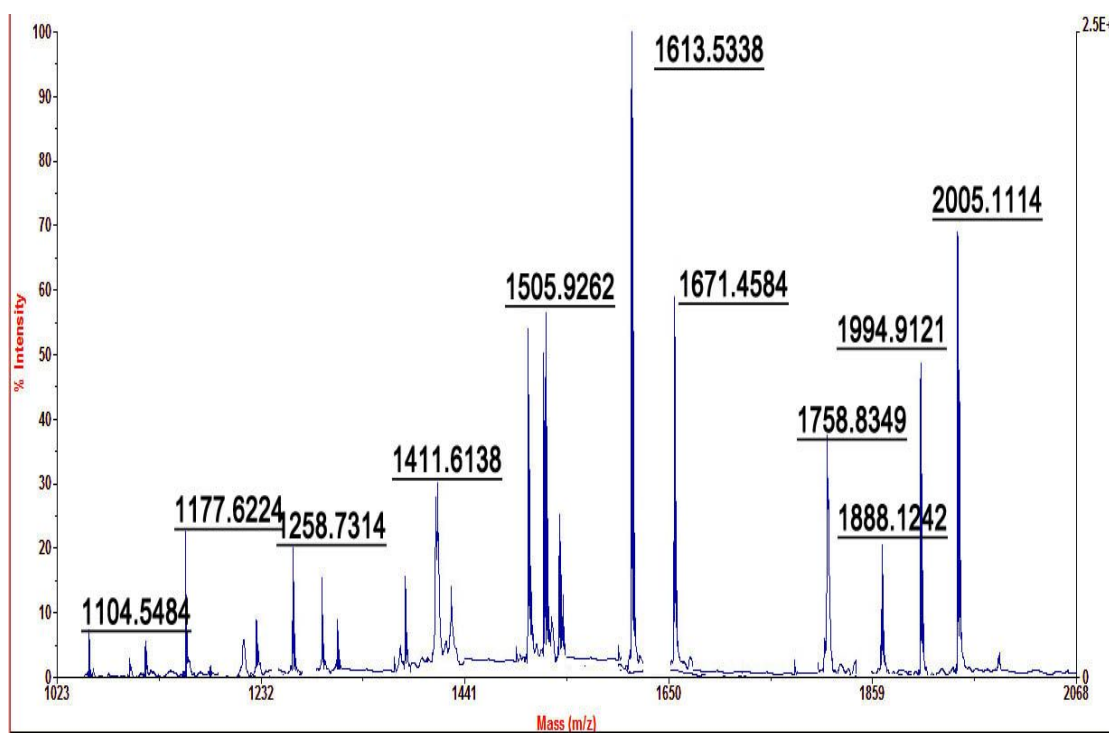

| Start - End                         | Observed  | Mr(expt)  | Mr(calc)  | Delta   | Miss Sequence                  |
|-------------------------------------|-----------|-----------|-----------|---------|--------------------------------|
| 6 - 16                              | 1104.5484 | 1103.5411 | 1103.5611 | -0.0200 | 0 K.SVSPPGYAAQK.T              |
| 75 - 98                             | 2499.1758 | 2498.1685 | 2498.0510 | 0.1175  | 0 R.SDDDDDPPLSGDDPLAGGFGRSFR.S |
| 130 - 154                           | 2093.0282 | 2092.0209 | 2092.0410 | -0.0200 | 0                              |
| <b>R.APPAGGGGSAAAAASAGGTEVRPR.S</b> |           |           |           |         |                                |
| 324 - 346                           | 2762.5692 | 2761.5619 | 2761.4520 | 0.1100  | 0 R.SASEGIWWTVFFIYTIYLLPVR.M   |
| 349 - 367                           | 1888.1242 | 1887.1169 | 1887.1669 | -0.0500 | 0 R.AAVLSGVLLSALHLAIALR.T      |
| 368 - 377                           | 1177.6224 | 1176.6151 | 1176.6139 | 0.0012  | 0 R.TNAQDQFLK.Q                |

|            |           |           |           |        |   |                |
|------------|-----------|-----------|-----------|--------|---|----------------|
| 815 - 825  | 1258.7314 | 1257.7241 | 1257.7081 | 0.0160 | 0 | K.LFPSPLQTLR.K |
| 988 - 1013 | 2867.8393 | 2866.8320 | 2866.6321 | 0.2000 | 0 |                |

K.VVTPIISVFLALYLHAQQVESTAR.L

|             |           |           |           |         |   |                         |
|-------------|-----------|-----------|-----------|---------|---|-------------------------|
| 1027 - 1037 | 1411.6138 | 1410.6065 | 1410.6085 | -0.0020 | 0 | K.EEMEELQAYNR.R         |
| 1099 - 1115 | 2005.1114 | 2004.1041 | 2004.0051 | 0.0990  | 0 | R.LLNEIADFDEIISDR.F     |
| 1124 - 1142 | 1994.9121 | 1993.9048 | 1993.8939 | 0.0109  | 0 | K.TIGSTYMAASGLNDSTYDK.V |
| 1164 - 1176 | 1671.4584 | 1670.4511 | 1670.7511 | -0.3000 | 0 | K.YINEHSFNQMK.I         |
| 1177 - 1192 | 1505.9262 | 1504.9189 | 1504.9090 | 0.0100  | 0 | K.IGLNIGPVVAGVIGAR.K    |
| 1247 - 1261 | 1613.5338 | 1612.5265 | 1612.7265 | -0.2000 | 0 | K.GEMMTYFLNGGPPLS.-     |

No match to: 1758.8349, 2156.8553, 2431.2195

368 Beta-defensin 104

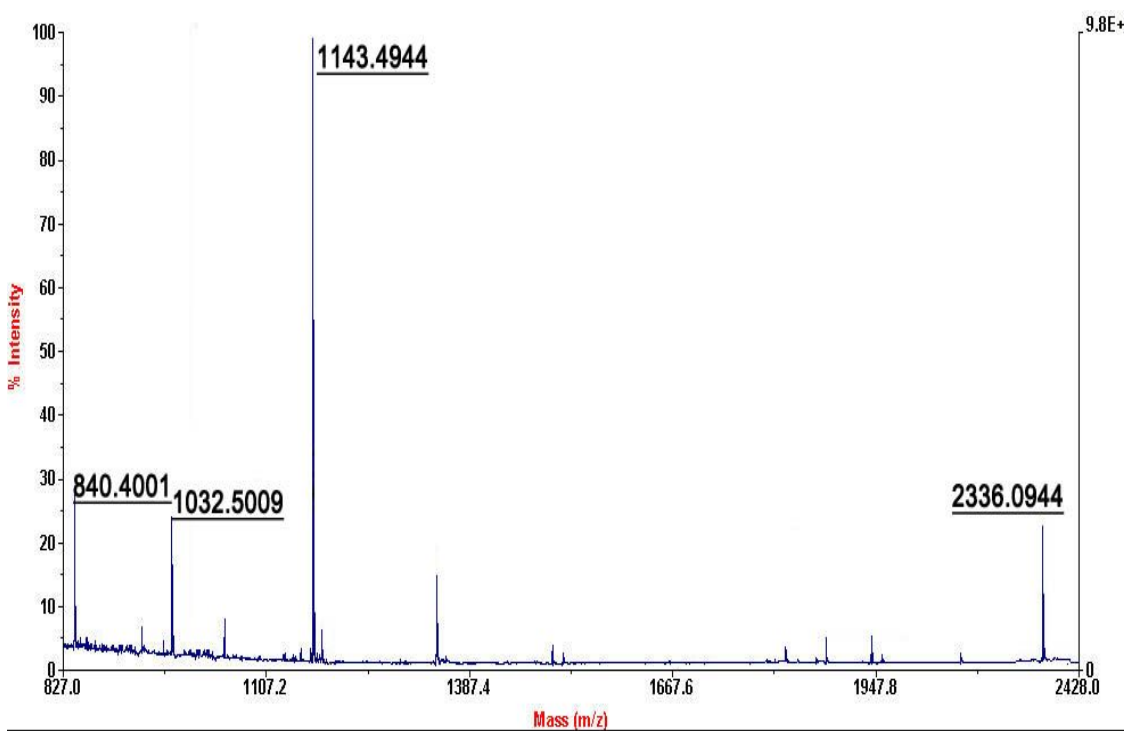

| Start - End | Observed  | Mr(expt)  | Mr(calc)  | Delta   | Miss Sequence    |
|-------------|-----------|-----------|-----------|---------|------------------|
| 29 - 36     | 840.4001  | 839.3928  | 839.3960  | -0.0031 | 0 R.ICGYGTAR.C   |
| 51 - 60     | 1143.4944 | 1142.4871 | 1142.4671 | 0.0200  | 0 R.CPNTYACCLR.K |
| 62 - 69     | 1032.5009 | 1031.4936 | 1031.5036 | -0.0100 | 0 K.WDESLNLR.T   |

369 Beta-defensin 105

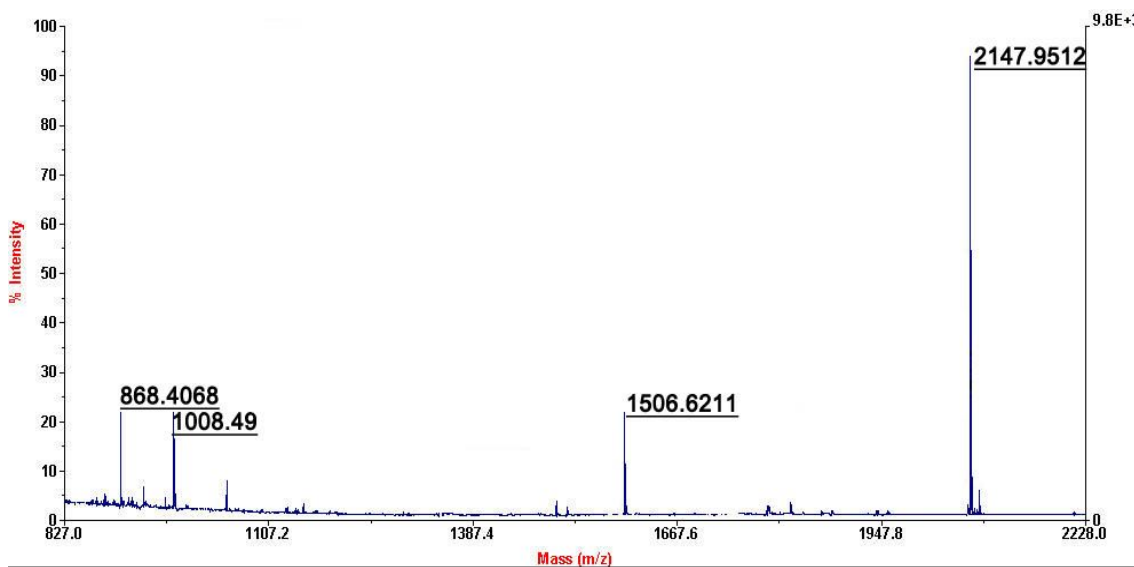

| Start - End | Observed  | Mr(expt)  | Mr(calc)  | Delta   | Miss Sequence       |
|-------------|-----------|-----------|-----------|---------|---------------------|
| 55 - 68     | 1634.7271 | 1633.7198 | 1633.7188 | 0.0010  | 1 R.KECLENKPDGNCR.L |
| 56 - 68     | 1506.6341 | 1505.6268 | 1505.6238 | 0.0030  | 0 K.ECLENKPDGNCR.L  |
| 69 - 75     | 868.4138  | 867.4065  | 867.4095  | -0.0030 | 0 R.LNFLCCR.Q       |
| 69 - 77     | 1152.5700 | 1151.5627 | 1151.5692 | -0.0065 | 1 R.LNFLCCRQR.I     |

No match to: 2147.9462

370 Beta-defensin 118

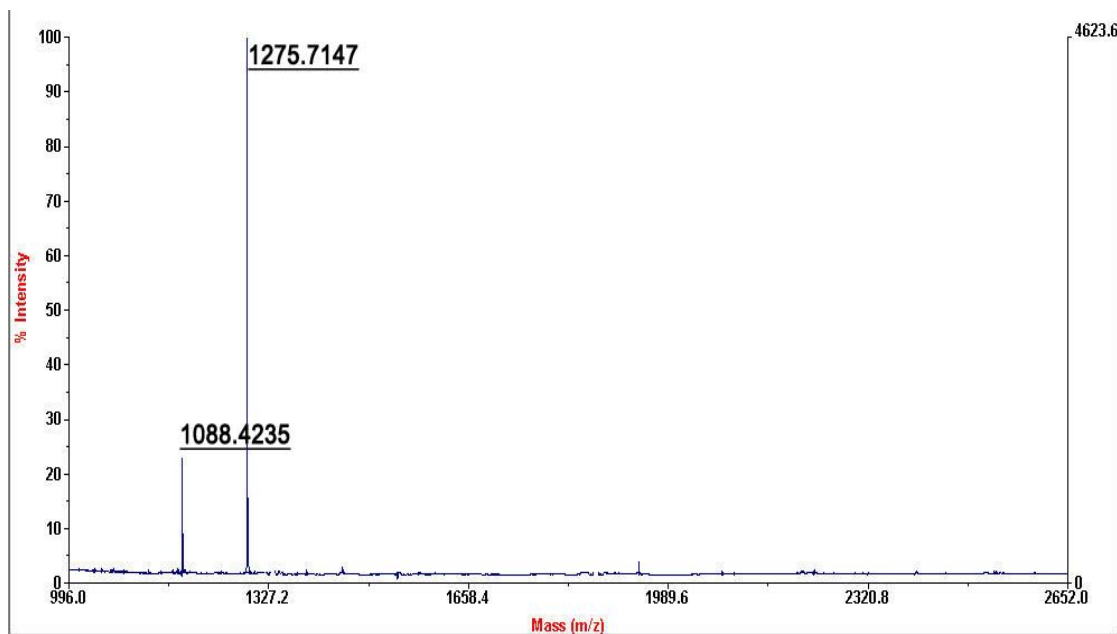

| Start - End | Observed  | Mr(expt)  | Mr(calc)  | Delta  | Miss Sequence    |
|-------------|-----------|-----------|-----------|--------|------------------|
| 27 - 35     | 1118.4751 | 1117.4678 | 1117.4658 | 0.0020 | 1 K.CWNRSGHCR.K  |
| 37 - 45     | 977.4722  | 976.4649  | 976.4648  | 0.0002 | 1 K.QCKDGEAVK.D  |
| 40 - 49     | 1065.4883 | 1064.4810 | 1064.4808 | 0.0002 | 1 K.DGEAVKDTCK.N |

46 - 52 849.4242 848.4169 848.4174 -0.0005 1 K.DTCKNLR.A

No match to: 1088.4139

371 Beta-defensin 121

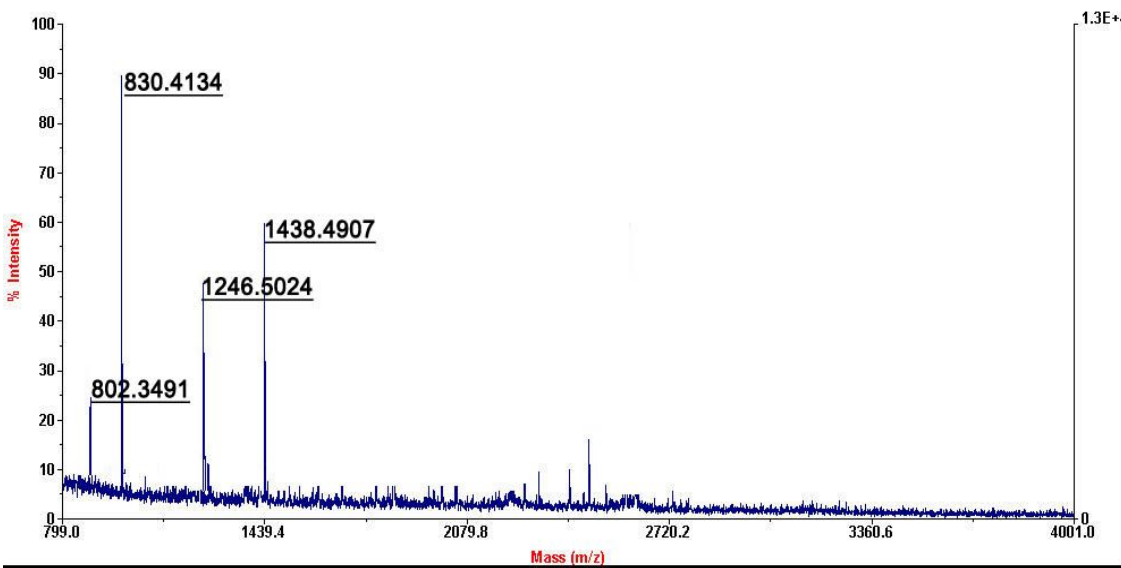

| Start - End | Observed  | Mr(expt)  | Mr(calc)  | Delta  | Miss Sequence        |
|-------------|-----------|-----------|-----------|--------|----------------------|
| 36 - 45     | 1246.6074 | 1245.6001 | 1245.5951 | 0.0050 | 0 K.ESEVYYILCK.T     |
| 56 - 62     | 830.5184  | 829.5111  | 829.5062  | 0.0050 | 0 K.YVPVKPK.L        |
| 63 - 76     | 1438.6967 | 1437.6894 | 1437.6835 | 0.0059 | 0 K.LTDTNTSLESTSAV.- |

No match to: 802.4495

372 Beta-defensin 129

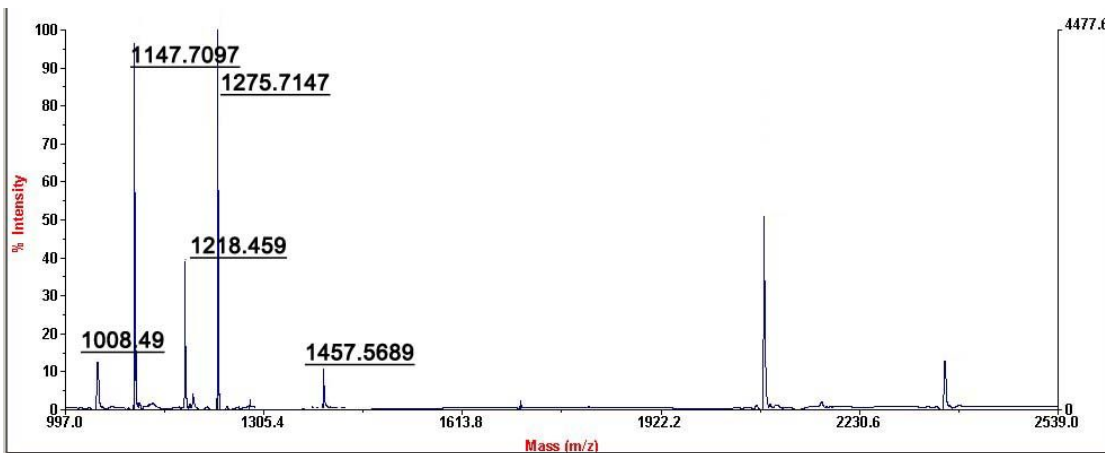

| Start - End | Observed | Mr(expt) | Mr(calc) | Delta | Miss Sequence |
|-------------|----------|----------|----------|-------|---------------|
|-------------|----------|----------|----------|-------|---------------|

|          |           |           |           |         |   |                             |
|----------|-----------|-----------|-----------|---------|---|-----------------------------|
| 27 - 35  | 1008.4900 | 1007.4827 | 1007.4827 | 0.0000  | 1 | R.CLMGLGRCR.D               |
| 34 - 43  | 1218.4590 | 1217.4517 | 1217.4917 | -0.0400 | 1 | R.CRDHCNVDEK.E              |
| 36 - 43  | 959.5887  | 958.5814  | 958.3814  | 0.2000  | 0 | R.DHCNVDEK.E                |
| 36 - 47  | 1457.5689 | 1456.5616 | 1456.6616 | -0.1000 | 1 | R.DHCNVDEKEIQK.C            |
| 65 - 87  | 2664.3237 | 2663.3164 | 2663.3265 | -0.0100 | 0 | K.NYLQYGTPNVLNEDVQEMLKPAK.N |
| 96 - 106 | 1275.7147 | 1274.7074 | 1274.8074 | -0.1000 | 1 | R.KHILSVLPQIK.S             |
| 97 - 106 | 1147.7097 | 1146.7024 | 1146.7125 | -0.0100 | 0 | K.HILSVLPQIK.S              |

373 Beta-defensin 132

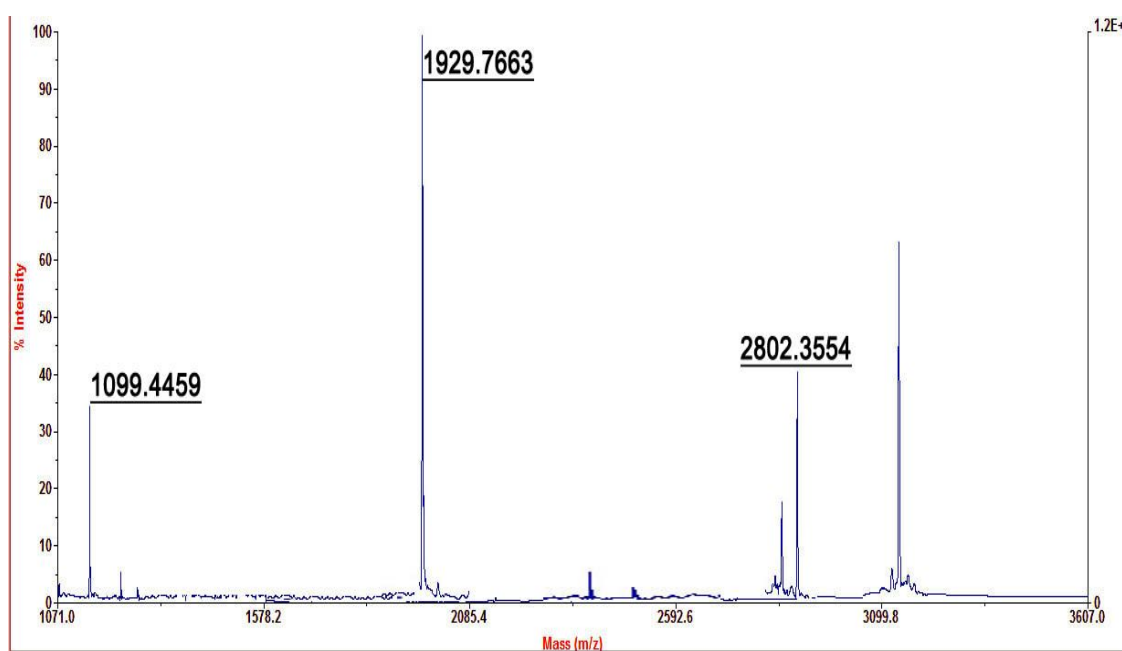

| Start - End | Observed  | Mr(expt)  | Mr(calc)  | Delta   | Miss Sequence                  |
|-------------|-----------|-----------|-----------|---------|--------------------------------|
| 27 - 36     | 1099.4459 | 1098.4386 | 1098.4586 | -0.0200 | 0 K.CVSNTPGYCR.T               |
| 37 - 53     | 1929.7663 | 1928.7590 | 1928.7790 | -0.0200 | 0 R.TCCHWGETALFMCNASR.K        |
| 55 - 78     | 2802.3554 | 2801.3481 | 2801.3781 | -0.0300 | 0 K.CCISYSFLPKPDLPLQIGNHWQSR.R |

No match to: 3101.1232

374 Cadherin-1

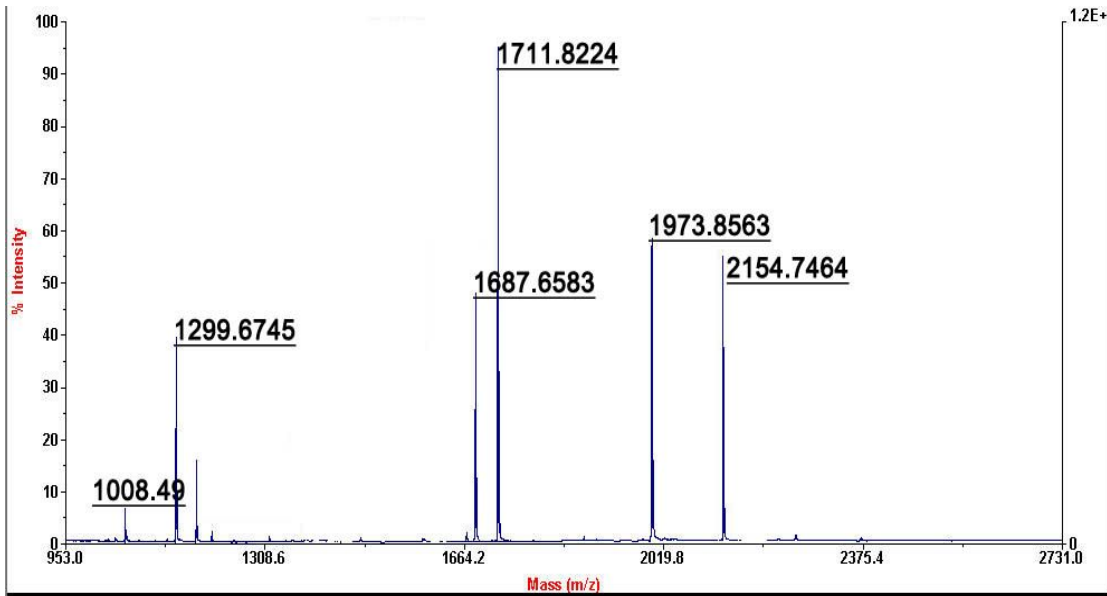

| Start - End | Observed  | Mr(expt)  | Mr(calc)  | Delta   | Miss Sequence            |
|-------------|-----------|-----------|-----------|---------|--------------------------|
| 382 - 397   | 1711.8224 | 1710.8151 | 1710.9152 | -0.1001 | 0 K.GQVPENEANVVITTLK.V   |
| 528 - 545   | 1973.8563 | 1972.8490 | 1972.9490 | -0.1000 | 0 R.DTANWLEINPDTGAISTR.A |
| 785 - 796   | 1299.6745 | 1298.6672 | 1298.6653 | 0.0020  | 0 R.NDVAPTLMSVPR.Y       |
| 856 - 868   | 1687.6583 | 1686.6510 | 1686.6910 | -0.0400 | 0 K.DQDYDYLNWGNR.F       |

No match to: 1008.4900, 2154.7464

### 375 A-kinase anchor protein 4

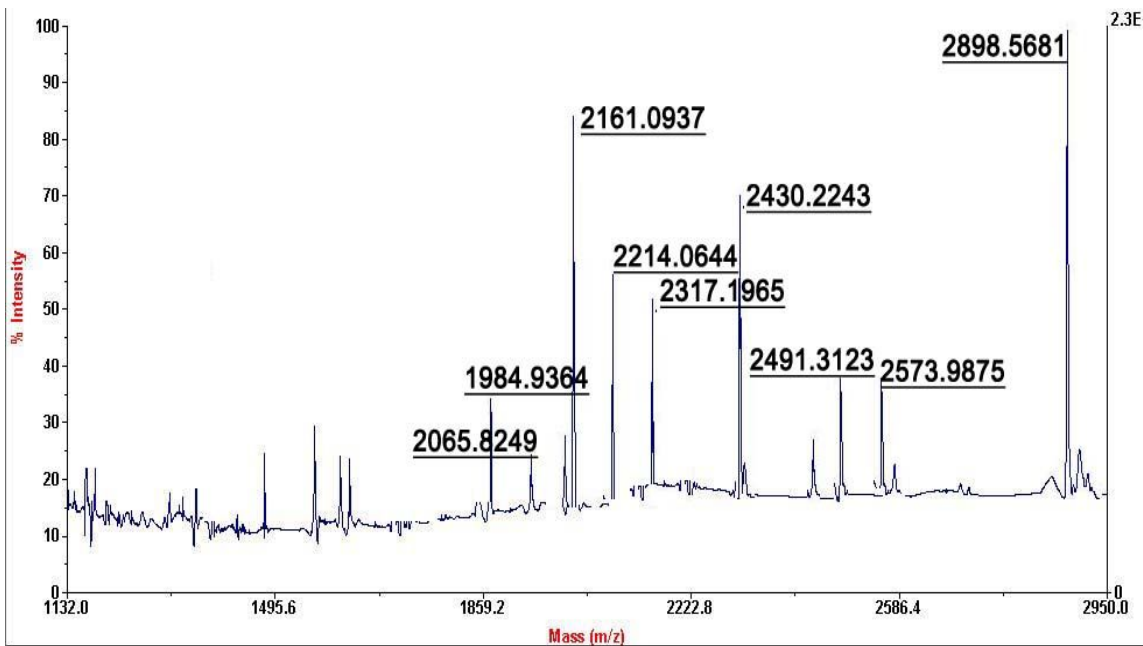

| Start - End | Observed  | Mr(expt)  | Mr(calc)  | Delta  | Miss Sequence               |
|-------------|-----------|-----------|-----------|--------|-----------------------------|
| 1 - 18      | 2214.0644 | 2213.0571 | 2212.8785 | 0.1786 | 0 -.MMAYSDDTTMMSDDIDWLR.S 2 |

Oxidation (M)

|           |           |           |           |         |                               |
|-----------|-----------|-----------|-----------|---------|-------------------------------|
| 270 - 287 | 1984.9364 | 1983.9291 | 1983.9281 | 0.0010  | 0 K.IASEMAYEAVELTAAEMR.G      |
| 332 - 353 | 2430.2243 | 2429.2170 | 2429.2190 | -0.0020 | 1 K.GLMVYANQVASDMMVSLMKTLLK.V |
| 389 - 408 | 2161.0937 | 2160.0864 | 2160.0885 | -0.0021 | 0 K.NLHNITGVLMTDSDVSAVK.R     |
| 389 - 409 | 2317.1965 | 2316.1892 | 2316.1896 | -0.0004 | 1 K.NLHNITGVLMTDSDVSAVKR.N    |
| 624 - 644 | 2491.3123 | 2490.3050 | 2490.3048 | 0.0002  | 1 K.MDMSNIVLMLIQKLLNENPFK.C   |
| 773 - 797 | 2898.5681 | 2897.5608 | 2897.4608 | 0.1000  | 0                             |

K.QLQAVLQWIAASQFNVPMLYFMGDK.D

No match to: 2065.8249, 2573.9875

376 Cystatin-8

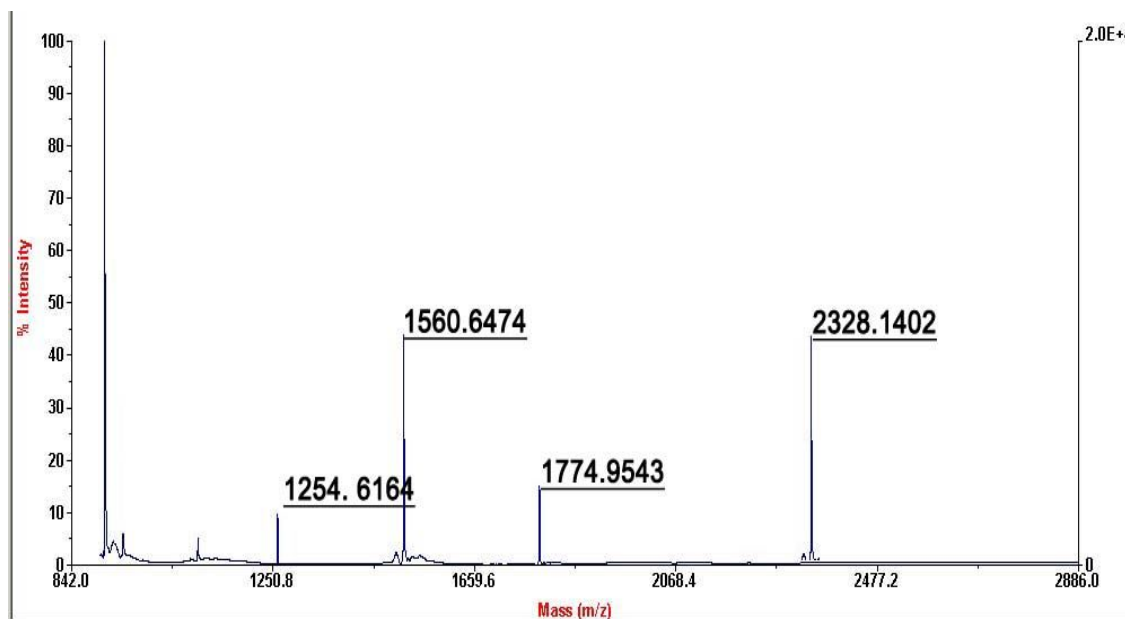

| Start - End | Observed  | Mr(expt)  | Mr(calc)  | Delta   | Miss Sequence               |
|-------------|-----------|-----------|-----------|---------|-----------------------------|
| 47 - 58     | 1560.6474 | 1559.6401 | 1559.6901 | -0.0500 | 0 K.QCLWFAMQEYNK.E          |
| 97 - 112    | 1774.9543 | 1773.9470 | 1773.8931 | 0.0540  | 0 R.KPLSTNEICAIQENSK.L      |
| 117 - 137   | 2328.1402 | 2327.1329 | 2327.1330 | -0.0001 | 0 K.LSCSFLVGALPWNGEFTVMEK.K |

No match to: 1008.4900, 1254.0000, 1299.6745



377 Cystatin-11

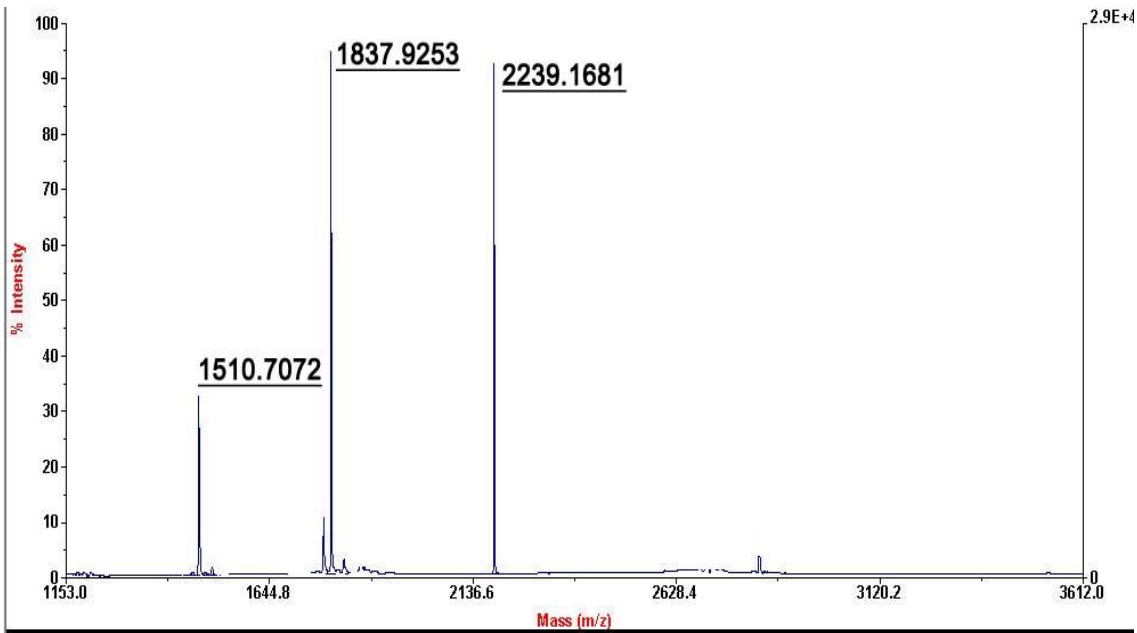

| Start - End                           | Observed  | Mr(expt)  | Mr(calc)  | Delta   | Miss Sequence             |
|---------------------------------------|-----------|-----------|-----------|---------|---------------------------|
| 30 - 45                               | 1837.9253 | 1836.9180 | 1836.9080 | 0.0100  | 0 K.TFLSVHEVMAVENYAK.D    |
| 46 - 57                               | 1510.7072 | 1509.6999 | 1509.7100 | -0.0100 | 0 K.DSLQWITDQYNK.E        |
| 76 - 107                              | 3857.7780 | 3856.7707 | 3856.7607 | 0.0100  | 0                         |
| R.QVTDHLEYHLNVEMQWTTTCQKPETTNCVPQER.E |           |           |           |         |                           |
| 112 - 129                             | 2239.1681 | 2238.1608 | 2238.0609 | 0.1000  | 0 K.QVNCFFSVFAVPWFEEQYK.I |

No match to: 1008.2314

378 Cystatin-C

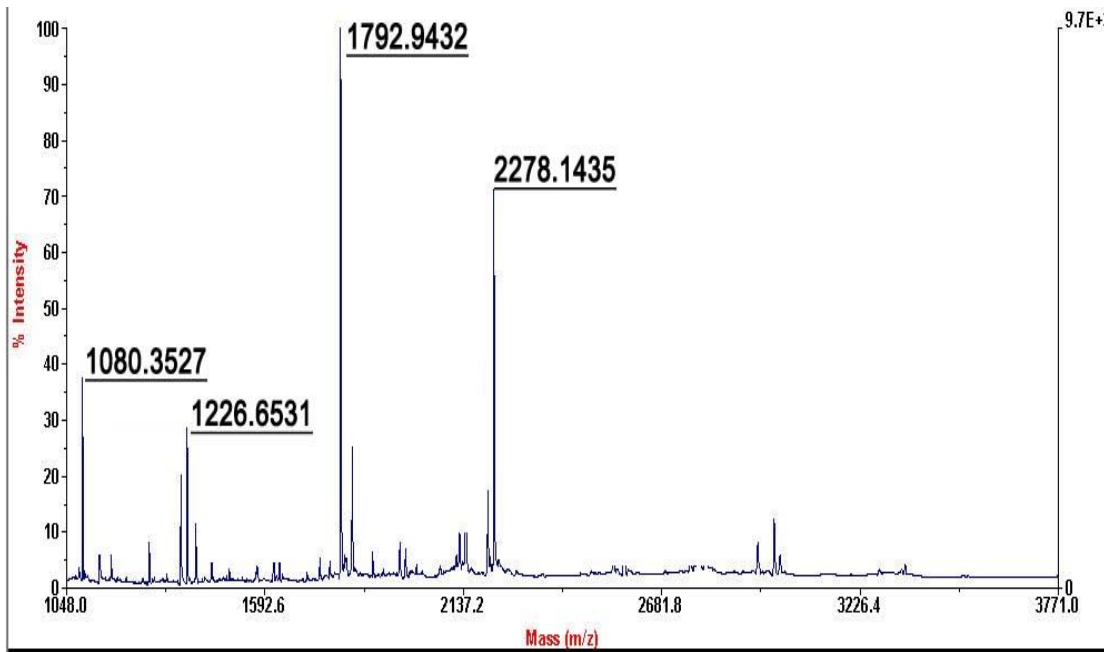

| Start - End | Observed  | Mr(expt)  | Mr(calc)  | Delta   | Miss Sequence              |
|-------------|-----------|-----------|-----------|---------|----------------------------|
| 52 - 62     | 1226.6531 | 1225.6458 | 1225.5979 | 0.0479  | 0 R.ALDFAVGEYNK.A          |
| 63 - 71     | 1080.3527 | 1079.3454 | 1079.4454 | -0.1000 | 0 K.ASNDMYHSR.A            |
| 81 - 96     | 1792.9432 | 1791.9359 | 1791.9519 | -0.0160 | 0 K.QIVAGVNYFLDVELGR.T     |
| 121 - 140   | 2278.1435 | 2277.1362 | 2277.0962 | 0.0400  | 0 K.AFCSFQIYAVPWQGTMTLSK.S |

379 Cysteine-rich secretory protein 1

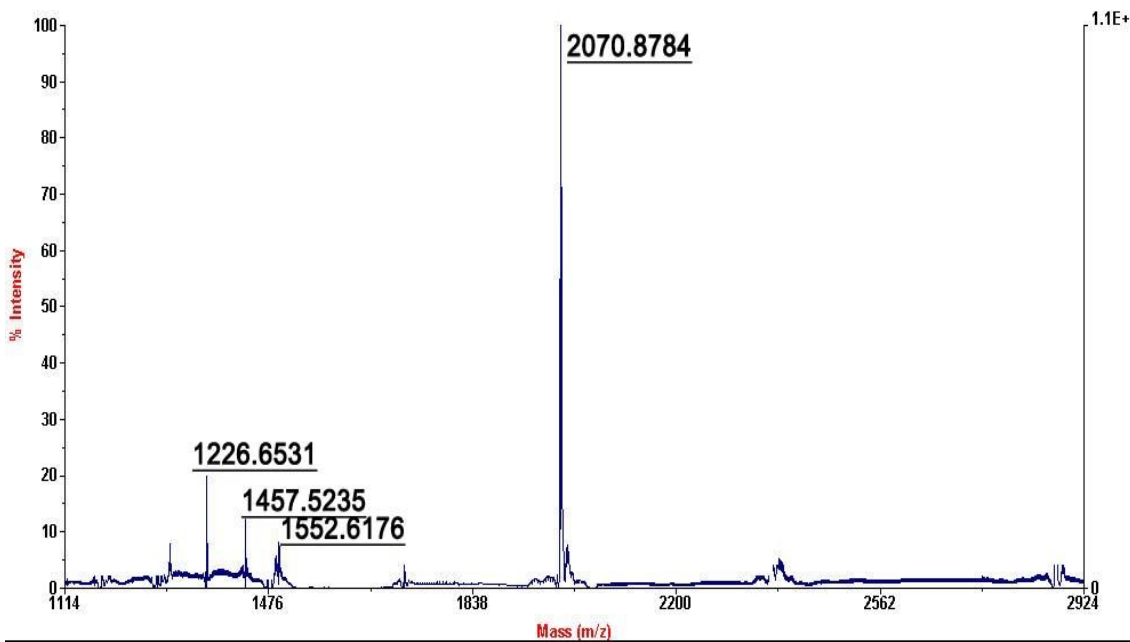

| Start - End | Observed  | Mr(expt)  | Mr(calc)  | Delta   | Miss Sequence    |
|-------------|-----------|-----------|-----------|---------|------------------|
| 55 - 64     | 1055.5547 | 1054.5474 | 1054.5845 | -0.0371 | 0 R.VVPPASNMLK.M |

|           |           |           |           |         |   |                       |
|-----------|-----------|-----------|-----------|---------|---|-----------------------|
| 81 - 92   | 1457.5235 | 1456.5162 | 1456.5962 | -0.0800 | 0 | K.YCDMTESNPLER.R      |
| 169 - 185 | 2070.8784 | 2069.8711 | 2069.8611 | 0.0100  | 0 | R.YLYVCHYCHEGNDPETK.N |
| 191 - 205 | 1552.6176 | 1551.6103 | 1551.6004 | 0.0100  | 0 | K.TGVPCEACPSNCEDK.L   |

No match to: 1080.3527, 1226.6531

### 380 Disintegrin and metalloproteinase domain-containing protein 28

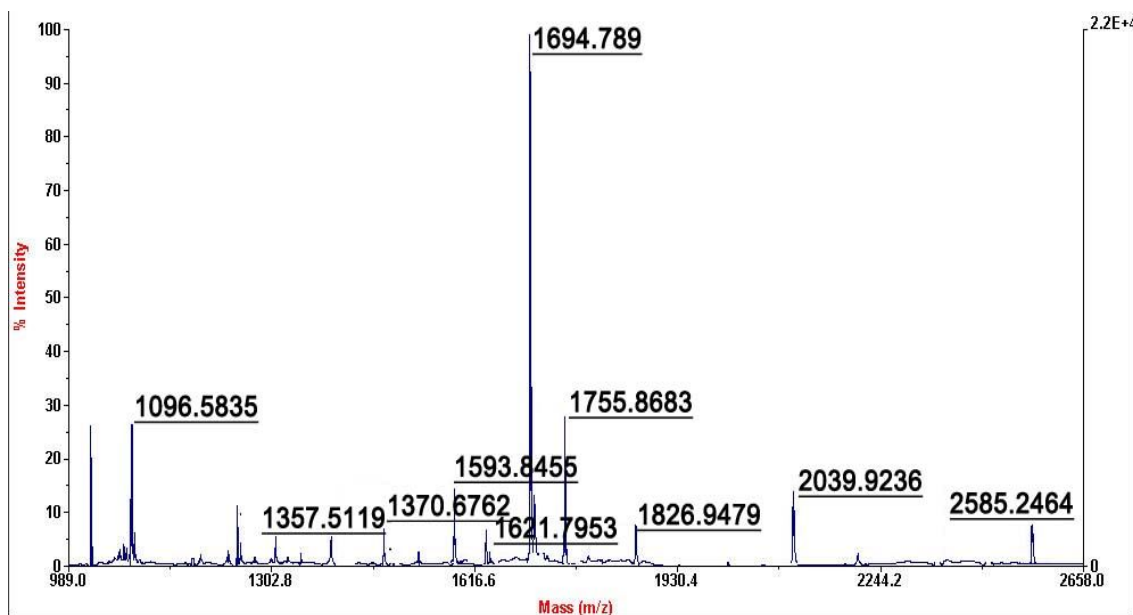

| Start - End                       | Observed  | Mr(expt)  | Mr(calc)  | Delta   | Miss Sequence             |
|-----------------------------------|-----------|-----------|-----------|---------|---------------------------|
| 231 - 243                         | 1621.7953 | 1620.7880 | 1620.7680 | 0.0200  | 0 R.VFEMANYVNMLYK.K       |
| 245 - 260                         | 1826.9479 | 1825.9406 | 1825.9397 | 0.0010  | 0 K.LNTHVALVGMEIWTDK.D    |
| 333 - 355                         | 2585.2464 | 2584.2391 | 2584.0392 | 0.1999  | 0                         |
| <b>R.VAGTMAHEMGNFGMFHDDYSCK.C</b> |           |           |           |         |                           |
| 356 - 365                         | 1096.5835 | 1095.5762 | 1095.4763 | 0.1000  | 0 K.CPSTICVMDK.A          |
| 443 - 455                         | 1402.6799 | 1401.6726 | 1401.5727 | 0.0999  | 0 K.ATFQCALGECCEK.C       |
| 490 - 501                         | 1370.6762 | 1369.6689 | 1369.6350 | 0.0339  | 0 R.FQVNGFPCHHGK.G        |
| 587 - 605                         | 2039.9236 | 2038.9163 | 2038.9154 | 0.0010  | 0 K.TFDPEDTSQEIGMVANGTK.C |
| 698 - 711                         | 1593.8455 | 1592.8382 | 1592.8383 | -0.0001 | 0 K.DQRPLSTTGTRPHK.Q      |

No match to: 1357.5119, 1694.7890, 1755.8683

### 381 Disintegrin and metalloproteinase domain-containing protein 7

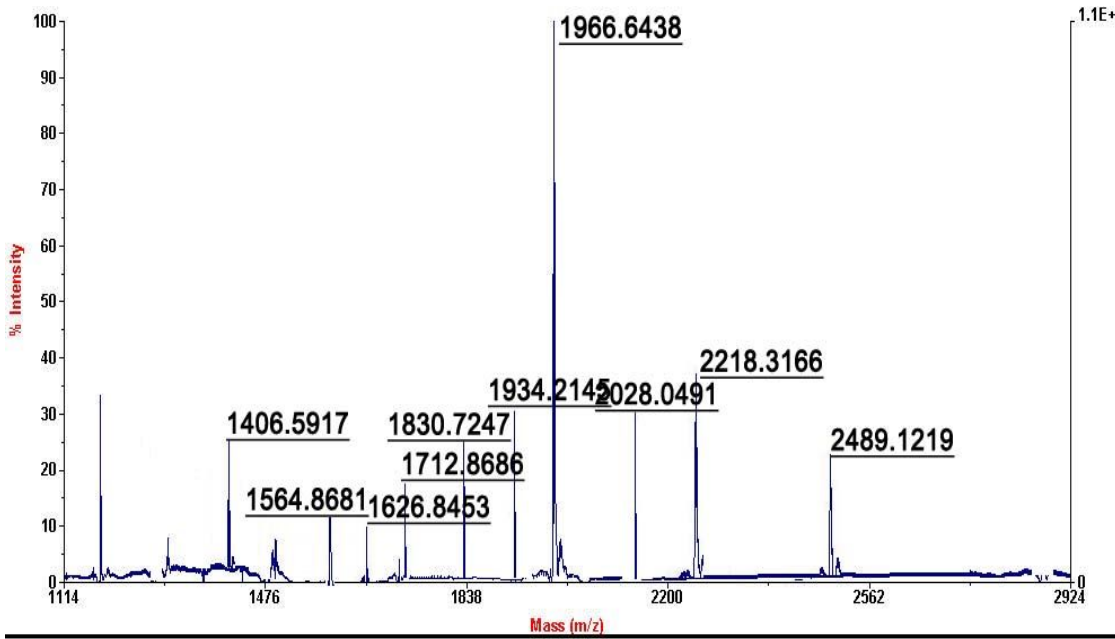

| Start - End | Observed  | Mr(expt)  | Mr(calc)  | Delta   | Miss Sequence              |
|-------------|-----------|-----------|-----------|---------|----------------------------|
| 179 - 191   | 1406.5917 | 1405.5844 | 1405.5845 | -0.0001 | 0 K.TVPGDNESEEDSK.I        |
| 239 - 257   | 2218.3166 | 2217.3093 | 2217.1794 | 0.1300  | 0 K.TLNIHVTLVGIEIWTEDK.I   |
| 258 - 270   | 1564.8681 | 1563.8608 | 1563.8508 | 0.0100  | 0 K.IELYSNIETLLR.F         |
| 357 - 369   | 1335.6253 | 1334.6180 | 1334.6210 | -0.0030 | 0 K.CVMDSDGSIPALK.F        |
| 465 - 482   | 1966.6438 | 1965.6365 | 1965.7365 | -0.1000 | 0 K.DECDFPEMCTGHSPACPK.D   |
| 494 - 503   | 1135.4567 | 1134.4494 | 1134.4474 | 0.0020  | 0 K.NSEGYCFMGK.C           |
| 508 - 528   | 2489.1219 | 2488.1146 | 2488.0046 | 0.1100  | 0 R.EDQCSELFDDAIESHDICYK.M |
| 610 - 626   | 1830.7247 | 1829.7174 | 1829.6875 | 0.0300  | 0 K.CGEGMVCNNGECLNMEK.V    |
| 700 - 714   | 1626.8453 | 1625.8380 | 1625.8261 | 0.0120  | 0 K.QVQSPPTETLGVENK.G      |
| 715 - 724   | 1212.5653 | 1211.5580 | 1211.5571 | 0.0009  | 0 K.GYFGDEQQIR.T           |
| 725 - 741   | 1934.2145 | 1933.2072 | 1933.0673 | 0.1400  | 0 R.TEPILPEIHFLNKPASK.D    |

No match to: 1712.8686, 2028.0491

382 Diamine acetyltransferase 1

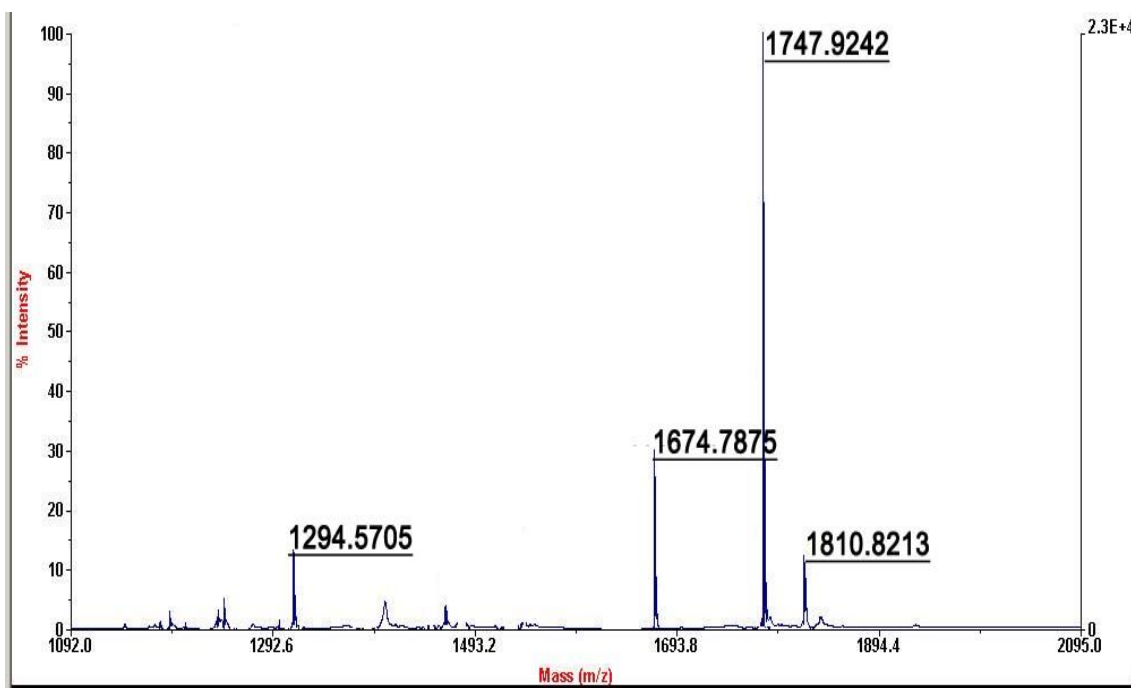

| Start - End | Observed  | Mr(expt)  | Mr(calc)  | Delta   | Miss Sequence             |
|-------------|-----------|-----------|-----------|---------|---------------------------|
| 4 - 19      | 1747.9242 | 1746.9169 | 1746.9087 | 0.0082  | 0 K.FVIRPATAADCSDILR.L    |
| 27 - 39     | 1674.7875 | 1673.7802 | 1673.7858 | -0.0056 | 0 K.YEYMEEQVILTEK.D       |
| 88 - 101    | 1810.8213 | 1809.8140 | 1809.8647 | -0.0507 | 0 K.LLYLEDDFFVMSDYR.G     |
| 102 - 111   | 1020.4354 | 1019.4281 | 1019.5651 | -0.1370 | 0 R.GFGIGSEILK.N          |
| 122 - 141   | 2402.0932 | 2401.0859 | 2401.0871 | -0.0012 | 0 R.CSSMHFLVAEWNPSINFYK.R |

No match to: 1294.5705

383 Epididymal-specific lipocalin-6

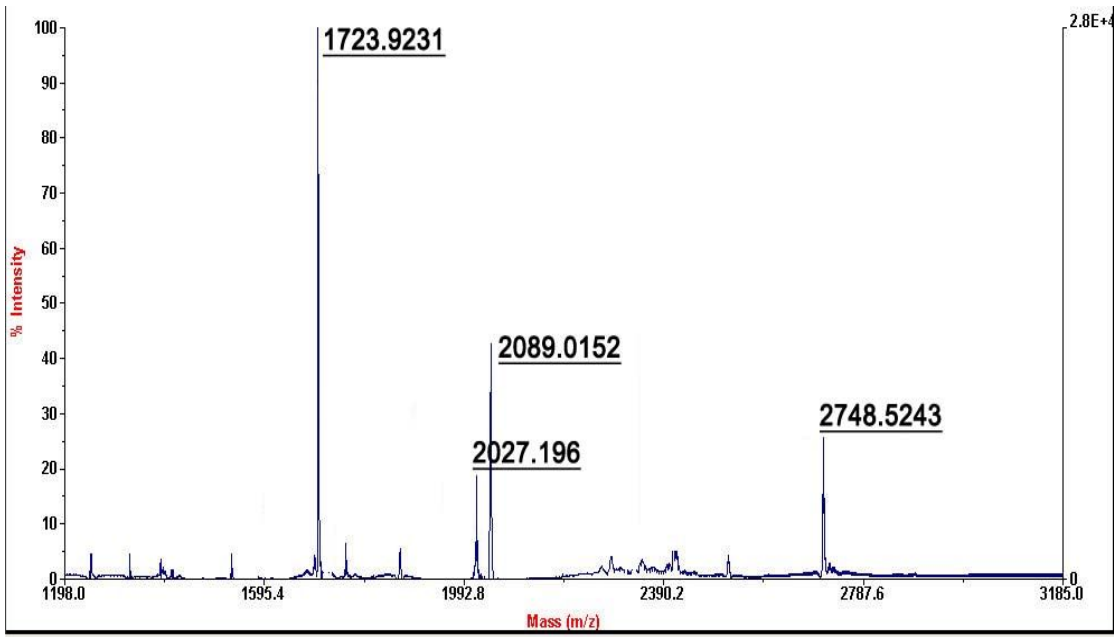

| Start - End | Observed  | Mr(expt)  | Mr(calc)  | Delta   | Miss Sequence                  |
|-------------|-----------|-----------|-----------|---------|--------------------------------|
| 26 - 43     | 2027.1960 | 2026.1887 | 2026.0887 | 0.1000  | 0 R.LDPEQLLGPWYVLAVASR.E       |
| 55 - 70     | 1723.9231 | 1722.9158 | 1722.9628 | -0.0470 | 0 K.NVVGVVVTLTPENLR.T          |
| 71 - 90     | 2089.0152 | 2088.0079 | 2087.9980 | 0.0099  | 0 R.TLSSQHGLGGCDQSVMDLIK.R     |
| 92 - 115    | 2748.5243 | 2747.5170 | 2747.4071 | 0.1099  | 0 R.NSGWVFENPSIGVLELWVLATNFR.D |

No match to: 1055.5547, 1080.3527

384 Epididymal-specific lipocalin-8

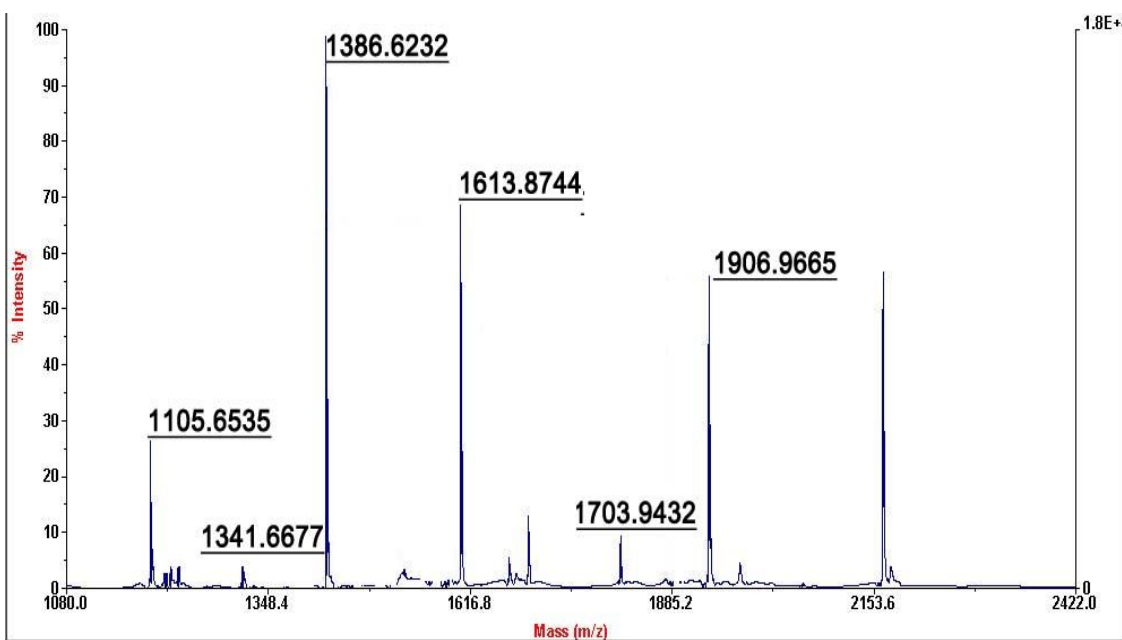

| Start - End | Observed  | Mr(expt)  | Mr(calc)  | Delta   | Miss Sequence          |
|-------------|-----------|-----------|-----------|---------|------------------------|
| 38 - 53     | 1613.8744 | 1612.8671 | 1612.8672 | -0.0001 | 0 R.EVGVASDQSLVLTAPK.R |
| 71 - 83     | 1386.6232 | 1385.6159 | 1385.6133 | 0.0027  | 0 K.VAYNSSGSCEIEK.I    |
| 84 - 94     | 1105.6535 | 1104.6462 | 1104.5663 | 0.0800  | 0 K.IVGSEIDSTGK.F      |
| 102 - 117   | 1906.9665 | 1905.9592 | 1905.9472 | 0.0120  | 0 R.EIHVLDTDYEGYAILR.V |
| 150 - 165   | 1703.9432 | 1702.9359 | 1702.9002 | 0.0357  | 0 R.ELTADTGLYLAARPGR.C |

No match to: 1341.6677, 2165.0424

### 385 Epididymis-specific alpha-mannosidase

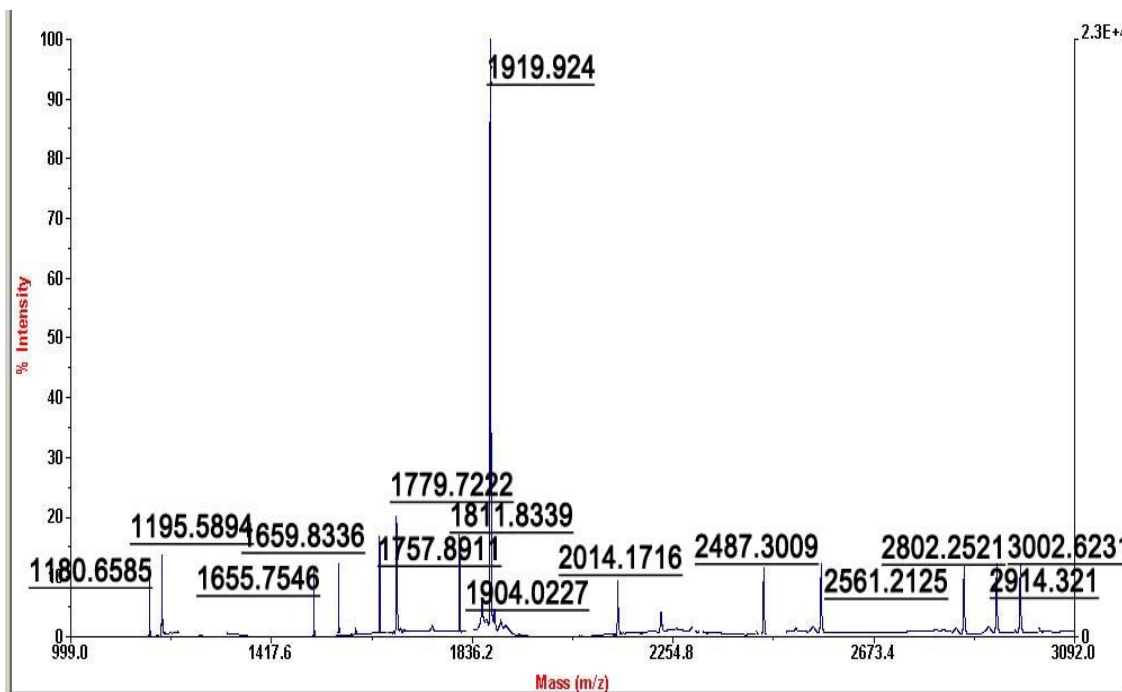

| Start - End | Observed  | Mr(expt)  | Mr(calc)  | Delta   | Miss Sequence                  |
|-------------|-----------|-----------|-----------|---------|--------------------------------|
| 204 - 227   | 2914.3210 | 2913.3137 | 2913.3214 | -0.0077 | 0 R.QEIFTHIMDQYSYCTPSHIPFSNR.S |
| 331 - 340   | 1180.6585 | 1179.6512 | 1179.6513 | -0.0000 | 0 R.ALHALNVTWR.V               |
| 343 - 365   | 2802.2521 | 2801.2448 | 2801.2511 | -0.0062 | 0 R.DHHDFLPYSTEPFQAWTGFYTSR.S  |
| 396 - 411   | 1904.0227 | 1903.0154 | 1903.0064 | 0.0090  | 0 R.GHLDPTWALQQLQQLR.W         |
| 684 - 699   | 1811.8339 | 1810.8266 | 1810.8897 | -0.0631 | 0 R.LTHVPQGHGELLCHR.I          |
| 700 - 713   | 1659.8336 | 1658.8263 | 1658.8264 | -0.0000 | 0 R.IEQEYQAGPLELNR.E           |
| 719 - 740   | 2561.2125 | 2560.2052 | 2560.1612 | 0.0440  | 0 R.TSTNLNSQQVIYSDNNGYQMQR.R   |
| 754 - 768   | 1779.7222 | 1778.7149 | 1778.7644 | -0.0495 | 0 R.NYYPMVQSAFMEDGK.S          |

778 - 795 1919.9240 1918.9167 1918.9432 -0.0265 0 R.AHGSSQGNQVEVMLHR.R  
 860 - 886 3002.6231 3001.6158 3001.6501 -0.0343 0

K.LPGPQQEAVTLPPNLHLQILSIPGWR.Y

978 - 997 2014.1716 2013.1643 2013.0644 0.1000 0 R.GDTPSPSRPPGGPIITVHPK.E  
 1001 - 1009 1195.5894 1194.5821 1194.5822 -0.0001 0 R.TFFIHFQQQ.-

No match to: 1655.7546, 1757.8911, 2487.3009

386 Eppin

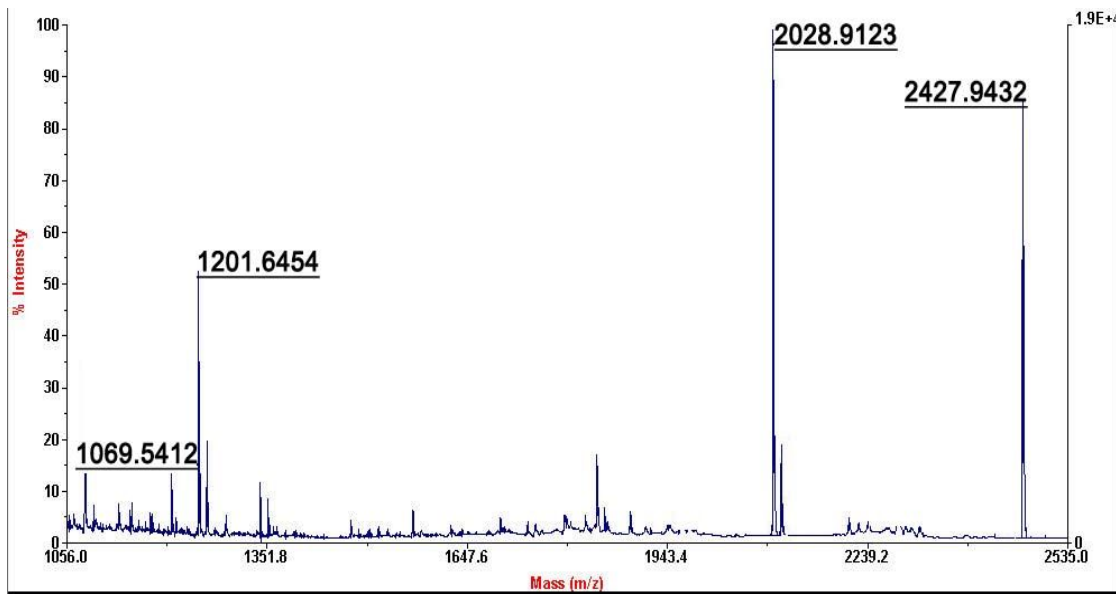

| Start - End | Observed  | Mr(expt)  | Mr(calc)  | Delta   | Miss Sequence               |
|-------------|-----------|-----------|-----------|---------|-----------------------------|
| 38 - 45     | 1069.5412 | 1068.5339 | 1068.4182 | 0.1157  | 0 R.EECEFQER.D              |
| 82 - 97     | 2028.9123 | 2027.9050 | 2027.9240 | -0.0190 | 0 K.ETGPCLAYFLHWYDK.K       |
| 99 - 120    | 2427.9432 | 2426.9359 | 2426.9678 | -0.0319 | 0 K.DNTCSMFVYGGCQGNNNFQSK.A |

No match to: 1201.6454

387 Epididymal sperm-binding protein 1



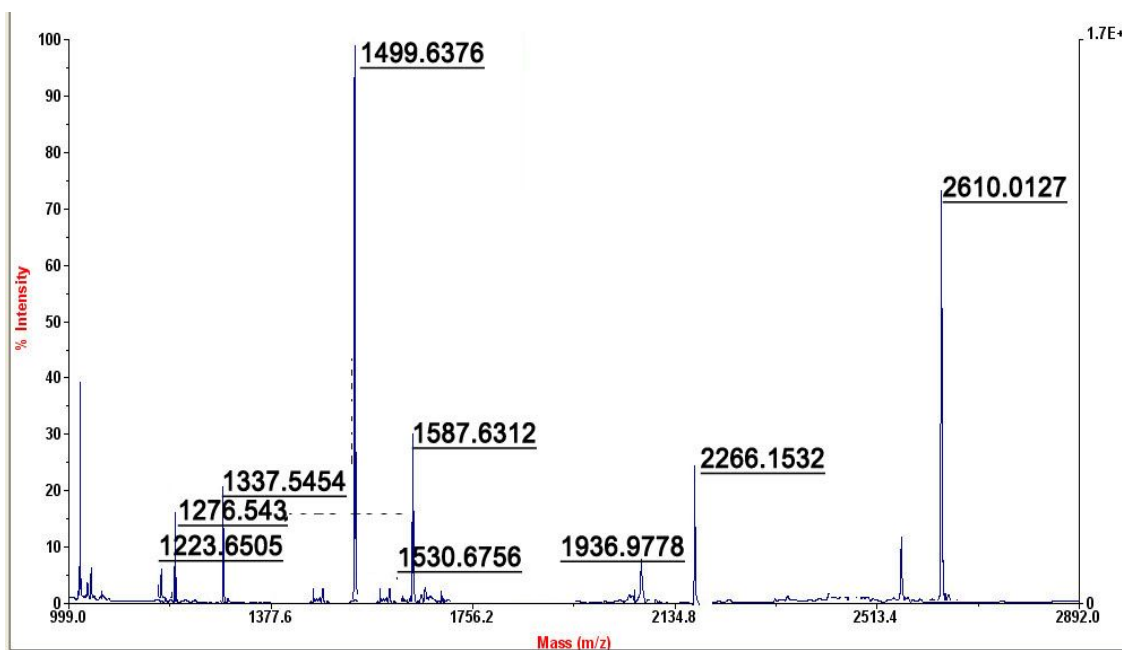

| Start - End | Observed  | Mr(expt)  | Mr(calc)  | Delta   | Miss Sequence               |
|-------------|-----------|-----------|-----------|---------|-----------------------------|
| 37 - 56     | 2266.1532 | 2265.1459 | 2265.0459 | 0.1000  | 0 K.GSVYFTCTHIHSLSPWCATR.A  |
| 74 - 81     | 1058.5392 | 1057.5319 | 1057.5419 | -0.0100 | 0 R.CIFPFIYR.G              |
| 127 - 136   | 1223.6505 | 1222.6432 | 1222.6532 | -0.0100 | 0 R.KPCIFPSIYR.N            |
| 151 - 161   | 1337.5454 | 1336.5381 | 1336.5791 | -0.0410 | 0 K.LWCPTTENMDK.D           |
| 173 - 189   | 1936.9778 | 1935.9705 | 1935.9706 | -0.0000 | 0 R.ISALVPGFCHFPFNYK.N      |
| 192 - 202   | 1276.5430 | 1275.5357 | 1275.5190 | 0.0167  | 0 K.NYFNCTNEGSK.E           |
| 203 - 223   | 2610.0127 | 2609.0054 | 2609.0628 | -0.0573 | 0 K.ENLVWCATSYNVDQDHTWVYC.- |

No match to: 1499.6376, 1530.6756, 1587.6312

388 Epididymal-specific lipocalin-12

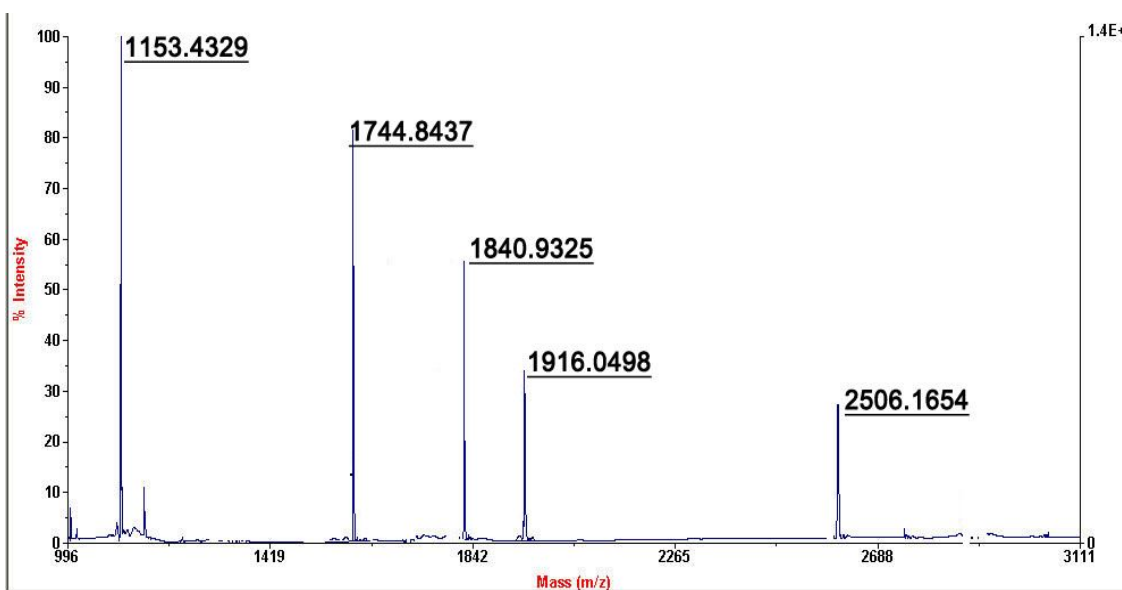

| Start - End | Observed  | Mr(expt)  | Mr(calc)  | Delta   | Miss Sequence                  |
|-------------|-----------|-----------|-----------|---------|--------------------------------|
| 59 - 75     | 1840.9325 | 1839.9252 | 1839.9003 | 0.0249  | 0 R.ALLNAFTATFELSDDGR.F        |
| 76 - 84     | 1153.4329 | 1152.4256 | 1152.5386 | -0.1130 | 0 R.FEVWNAMTR.G                |
| 121 - 135   | 1744.8437 | 1743.8364 | 1743.8502 | -0.0138 | 0 R.VVDSDYTQFALMLSR.R          |
| 152 - 168   | 1916.0498 | 1915.0425 | 1915.0026 | 0.0399  | 0 R.SWLLPPGTLTLDQFICLGR.A      |
| 169 - 192   | 2506.1654 | 2505.1581 | 2505.1482 | 0.0099  | 0 R.AQGLSDDNIVFPDVTGWSPQASVC.- |

### 389 F-actin-capping protein subunit alpha-3

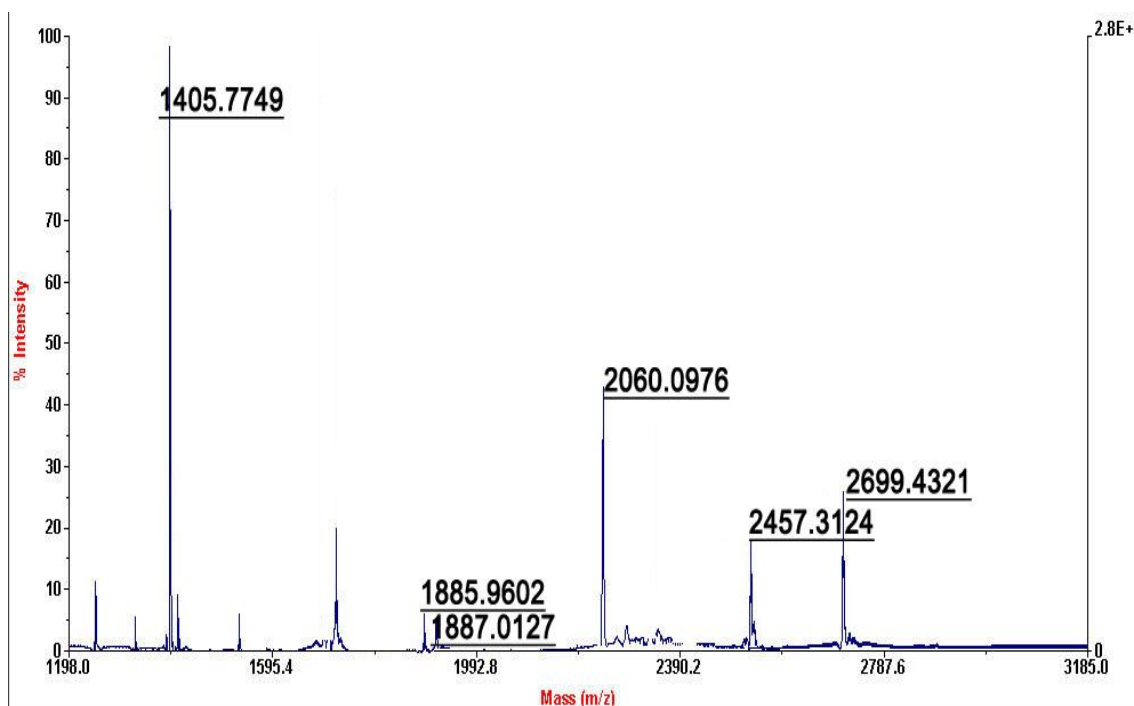

| Start - End | Observed  | Mr(expt)  | Mr(calc)  | Delta   | Miss Sequence                 |
|-------------|-----------|-----------|-----------|---------|-------------------------------|
| 18 - 39     | 2457.3124 | 2456.3051 | 2456.3137 | -0.0086 | 0 R.LLLQAPPGEFVNAFDDLCLLIR.D  |
| 59 - 82     | 2699.4321 | 2698.4248 | 2698.2996 | 0.1252  | 0 K.YSVPLCIDGNPVLSSHNVMGDYR.F |
| 94 - 102    | 1134.6154 | 1133.6081 | 1133.6080 | 0.0001  | 0 K.YDLLQNQLK.D               |
| 103 - 118   | 1885.9602 | 1884.9529 | 1884.9330 | 0.0200  | 0 K.DIQSHGIIQNEAEYLR.V        |
| 198 - 207   | 1155.6590 | 1154.6517 | 1154.6118 | 0.0400  | 0 R.CVNLHIEISK.D              |
| 236 - 253   | 2060.0976 | 2059.0903 | 2059.0585 | 0.0318  | 0 K.FQAAVLEELQELSNEALR.K      |
| 272 - 283   | 1405.7749 | 1404.7676 | 1404.7686 | -0.0010 | 0 R.ILSDLNLVMPK.L             |

No match to: 1887.0127

390 Thioredoxin domain-containing protein 3

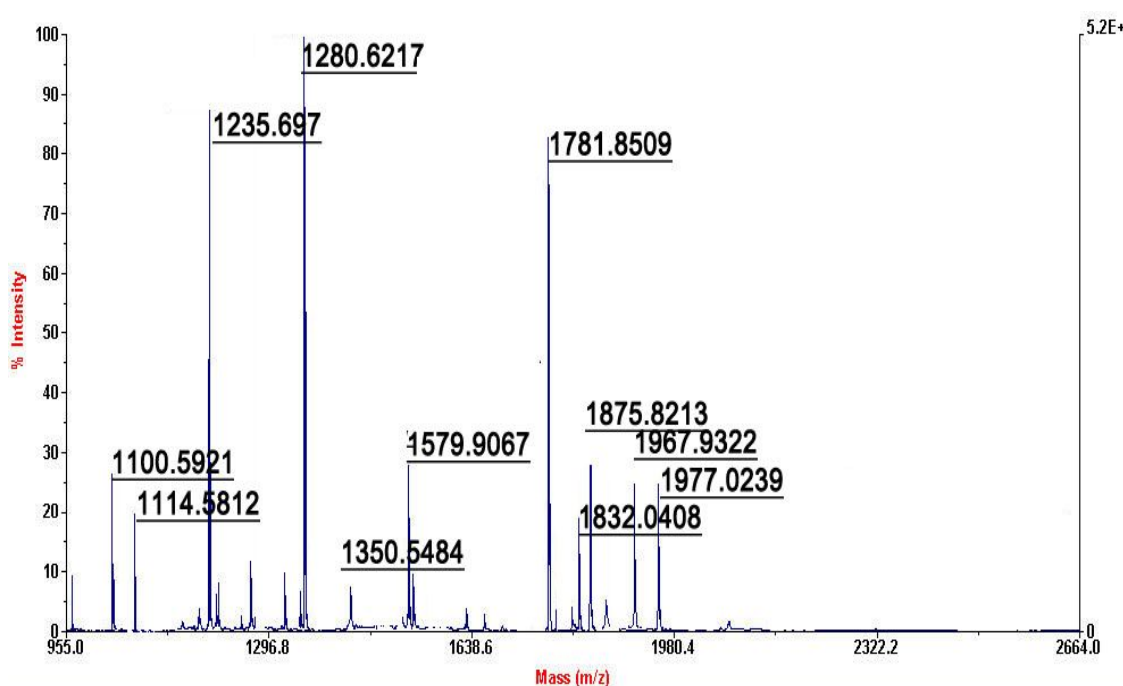

| Start - End | Observed  | Mr(expt)  | Mr(calc)  | Delta   | Miss Sequence            |
|-------------|-----------|-----------|-----------|---------|--------------------------|
| 110 - 118   | 1100.5921 | 1099.5848 | 1099.5873 | -0.0025 | 0 K.VINLIDEER.K          |
| 180 - 189   | 1114.5812 | 1113.5739 | 1113.5818 | -0.0079 | 0 K.AGFIEAEHK.T          |
| 252 - 268   | 1875.8213 | 1874.8140 | 1874.8390 | -0.0250 | 0 R.SEDQPEVEAQVTPGMMK.N  |
| 271 - 280   | 1280.6217 | 1279.6144 | 1279.6044 | 0.0100  | 0 K.QDSLQEYLER.Q         |
| 281 - 298   | 1967.9322 | 1966.9249 | 1966.9418 | -0.0169 | 0 R.QHLAQLCDIEEDAANVAK.F |
| 318 - 330   | 1579.9067 | 1578.8994 | 1578.8994 | 0.0000  | 0 K.TLALLRPNLFHER.K      |
| 364 - 373   | 1350.5484 | 1349.5411 | 1349.5411 | -0.0000 | 0 K.EYENEDYFNK.L         |
| 475 - 485   | 1235.6970 | 1234.6897 | 1234.6557 | 0.0340  | 1 K.EAGFDLTQVKK.M        |
| 508 - 525   | 1977.0239 | 1976.0166 | 1976.0396 | -0.0230 | 0 K.DLLEMLSVGPSMVMILTK.W |

No match to: 1781.8509, 1832.0408

391 Thioredoxin domain-containing protein 5

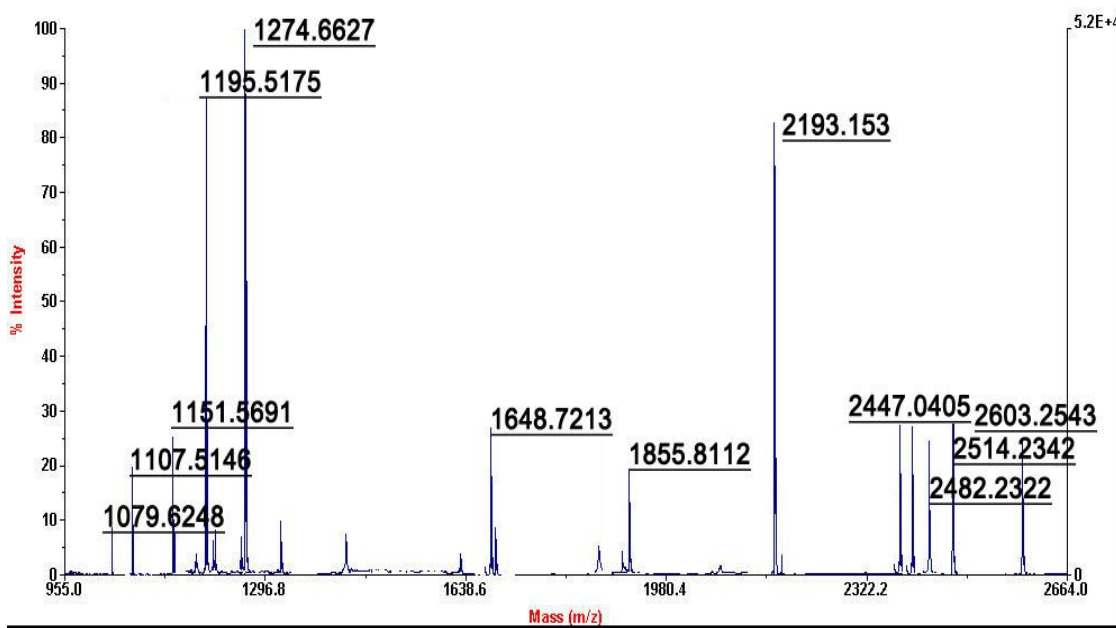

| Start - End                   | Observed  | Mr(expt)  | Mr(calc)  | Delta   | Miss Sequence                 |
|-------------------------------|-----------|-----------|-----------|---------|-------------------------------|
| 38 - 63                       | 2447.0405 | 2446.0332 | 2446.0633 | -0.0300 | 0                             |
| R.AQEAAAAADGPPAADGEDGQDPHSK.H |           |           |           |         |                               |
| 189 - 211                     | 2603.2543 | 2602.2470 | 2602.2816 | -0.0346 | 0 K.QGLYELSASNFEHVAQGDHFIK.F  |
| 212 - 221                     | 1195.5175 | 1194.5102 | 1194.5103 | -0.0001 | 0 K.FFAPWCGHCK.A              |
| 222 - 241                     | 2193.1530 | 2192.1457 | 2192.1477 | -0.0020 | 0 K.ALAPTWEQLALGLEHSETVK.I    |
| 288 - 296                     | 1151.5691 | 1150.5618 | 1150.5618 | -0.0000 | 0 R.EYVESQLQR.T               |
| 297 - 321                     | 2514.2342 | 2513.2269 | 2513.2021 | 0.0249  | 0                             |
| R.TETGATETVTPSEAPVLAAEPEADK.G |           |           |           |         |                               |
| 322 - 344                     | 2482.2322 | 2481.2249 | 2481.2639 | -0.0390 | 0 K.GTVLALTENNFDITIAEGITFIK.F |
| 355 - 365                     | 1274.6627 | 1273.6554 | 1273.6554 | 0.0000  | 0 K.TLAPTWEELSK.K             |
| 395 - 403                     | 1079.6248 | 1078.6175 | 1078.6175 | 0.0000  | 0 R.GYPTLLLFR.G               |

No match to: 1107.5146, 1648.7213, 1855.8112

392 WD repeat-containing protein 8

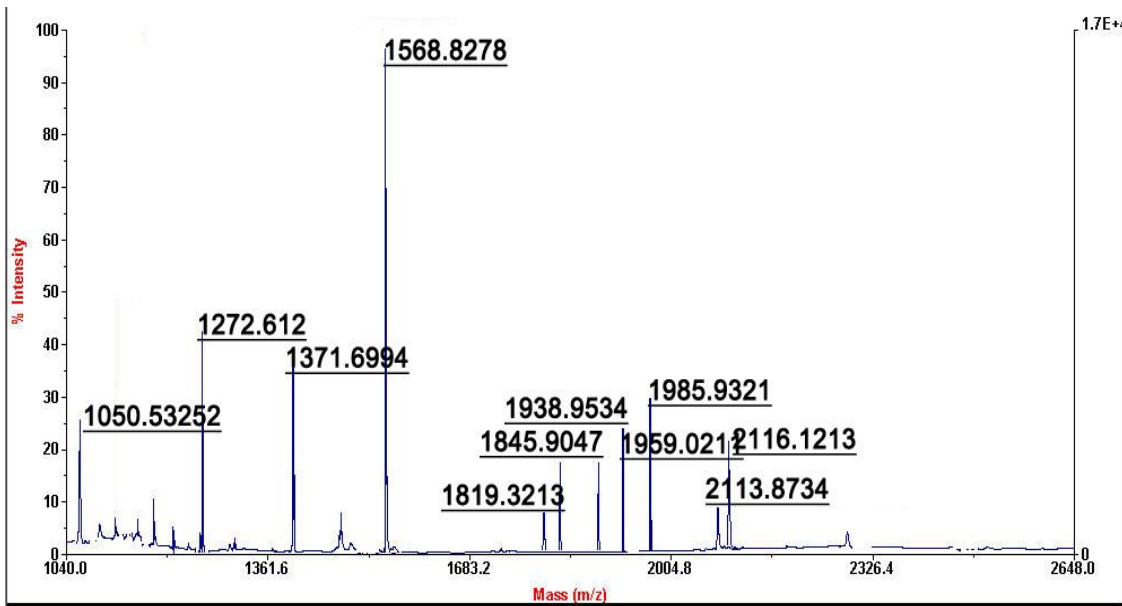

| Start - End | Observed  | Mr(expt)  | Mr(calc)  | Delta   | Miss Sequence             |
|-------------|-----------|-----------|-----------|---------|---------------------------|
| 71 - 86     | 1938.9534 | 1937.9461 | 1937.9458 | 0.0003  | 0 R.GLVQVWSLEQPEWHCK.I    |
| 116 - 124   | 1050.5325 | 1049.5252 | 1049.5580 | -0.0327 | 0 R.ITVWSLCTK.S           |
| 228 - 246   | 1985.9321 | 1984.9248 | 1984.9531 | -0.0282 | 0 K.SVAWSPSSQFLAVGSYDGK.V |
| 281 - 295   | 1568.8278 | 1567.8205 | 1567.8181 | 0.0024  | 0 K.SPQLGLGCLSFPPPR.A     |
| 308 - 326   | 2116.1213 | 2115.1140 | 2115.1576 | -0.0435 | 0 K.YEIASVPVSLQTLKPVTDR.A |
| 331 - 348   | 1959.0211 | 1958.0138 | 1957.9972 | 0.0167  | 0 K.IGIGMLAFSPDSYFLATR.N  |
| 349 - 363   | 1811.9432 | 1810.9359 | 1810.9002 | 0.0357  | 0 R.NDNIPNAVWVWDIQL.L     |
| 366 - 377   | 1371.6994 | 1370.6921 | 1370.7922 | -0.1001 | 0 R.LFAVLEQLSPVR.A        |
| 378 - 387   | 1272.6120 | 1271.6047 | 1271.6047 | 0.0000  | 0 R.AFQWDPQQPR.L          |
| 436 - 454   | 2113.8734 | 2112.8661 | 2112.9431 | -0.0770 | 0 K.DHFCLCFLETEAVVGTACR.Q |

No match to: 1819.3213, 1845.9047

393 WAP four-disulfide core domain protein 8

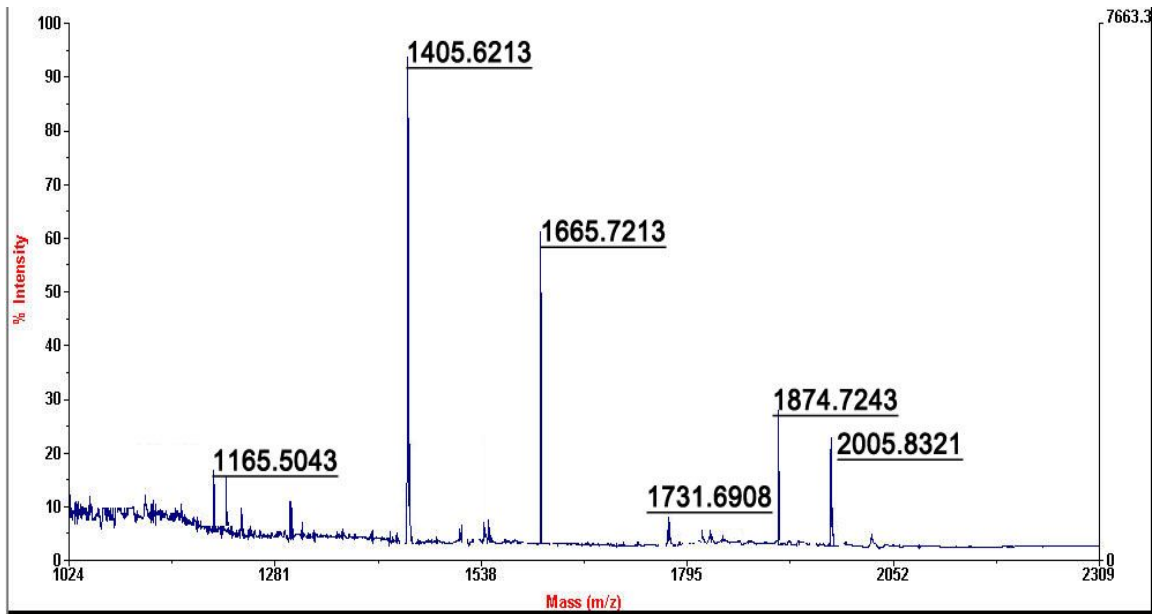

| Start - End | Observed  | Mr(expt)  | Mr(calc)  | Delta   | Miss Sequence            |
|-------------|-----------|-----------|-----------|---------|--------------------------|
| 56 - 73     | 2005.8321 | 2004.8248 | 2004.8115 | 0.0133  | 0 R.LTCTTELPDSCNTDFDCK.E |
| 87 - 100    | 1665.7213 | 1664.7140 | 1664.7183 | -0.0043 | 0 K.CMDPFQEPCLPVR.H      |
| 101 - 110   | 1165.5043 | 1164.4970 | 1164.4843 | 0.0128  | 0 R.HGNCNHEAQR.W         |
| 164 - 180   | 1874.7243 | 1873.7170 | 1873.7281 | -0.0111 | 0 K.ECPPSCHSDIDCPQTDK.C  |
| 216 - 227   | 1405.6213 | 1404.6140 | 1404.6265 | -0.0125 | 0 K.CLQDEECPLVEK.C       |

No match to: 1731.6908

394 WAP four-disulfide core domain protein 6

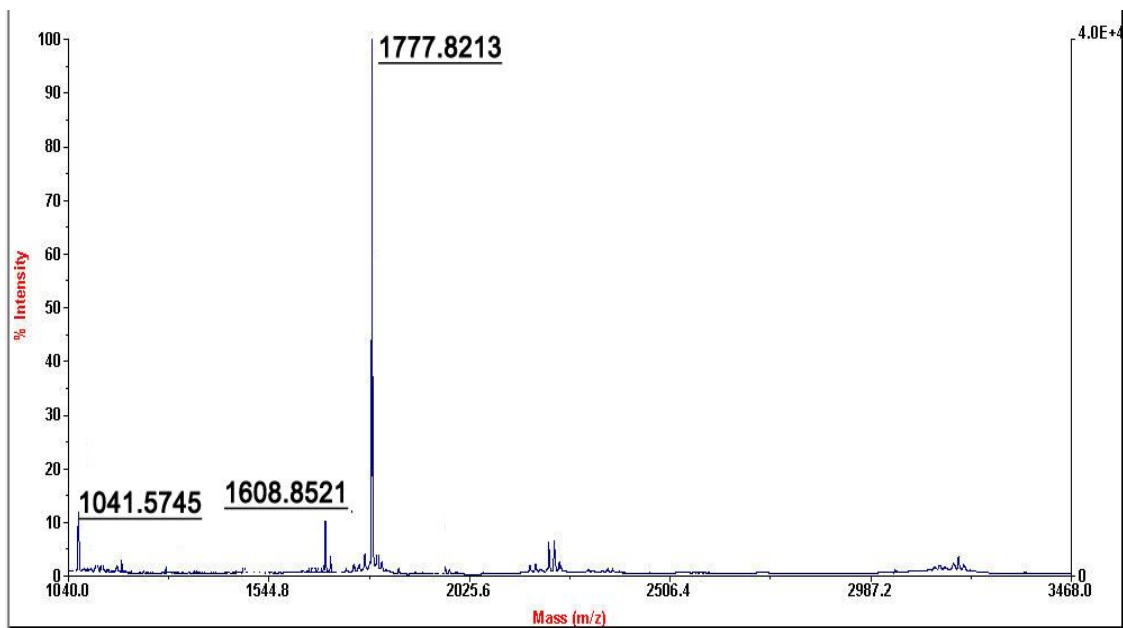

| Start - End | Observed  | Mr(expt)  | Mr(calc)  | Delta   | Miss Sequence           |
|-------------|-----------|-----------|-----------|---------|-------------------------|
| 36 - 52     | 2018.9892 | 2017.9819 | 2017.9812 | 0.0007  | 1 K.IKVECEVEEIDQCTKPR.D |
| 38 - 52     | 1777.8083 | 1776.8010 | 1776.8022 | -0.0012 | 0 K.VECEVEEIDQCTKPR.D   |
| 75 - 82     | 1017.5403 | 1016.5330 | 1016.5338 | -0.0008 | 1 K.IYAVCHRR.L          |
| 83 - 97     | 1608.8524 | 1607.8451 | 1607.8460 | -0.0009 | 0 R.LAPAWPPYHTGGTIK.K   |

No match to: 1041.5754, 1282.7542

### 395 Ribonuclease-like protein 9

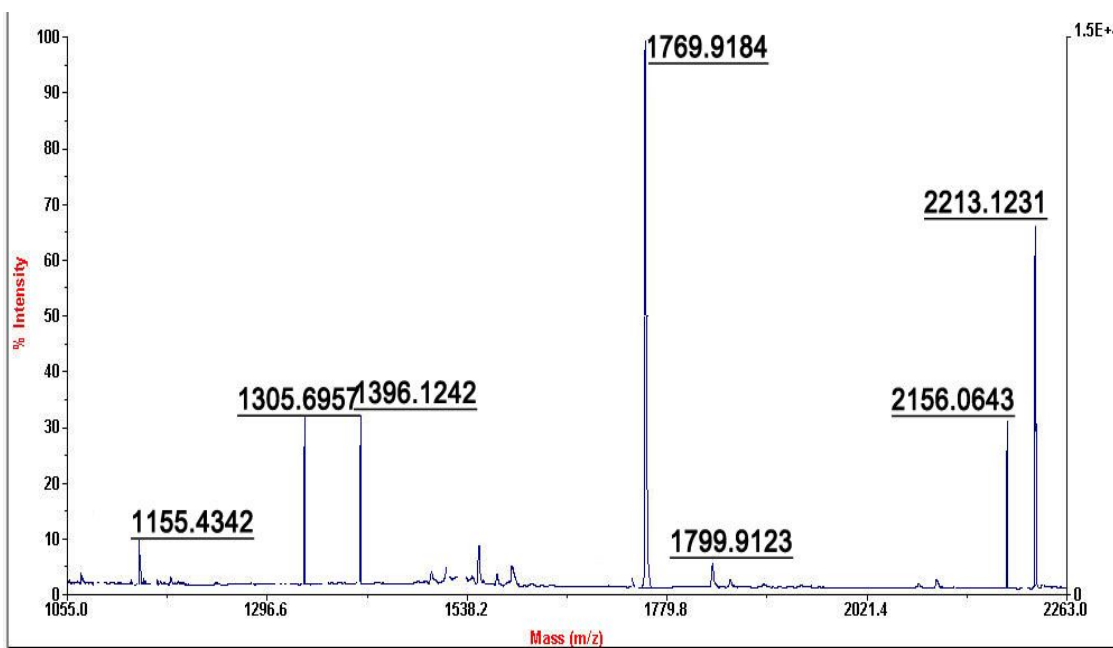

| Start - End | Observed  | Mr(expt)  | Mr(calc)  | Delta   | Miss Sequence              |
|-------------|-----------|-----------|-----------|---------|----------------------------|
| 42 - 50     | 1155.4342 | 1154.4269 | 1154.4801 | -0.0532 | 0 K.EEFEECLEK.F            |
| 51 - 62     | 1305.6957 | 1304.6884 | 1304.6877 | 0.0007  | 0 K.FFSTGPARPPTK.E         |
| 98 - 114    | 2213.1231 | 2212.1158 | 2212.0663 | 0.0495  | 0 R.WVAEHYFLLMQYDELQK.I    |
| 135 - 154   | 2156.0643 | 2155.0570 | 2155.0329 | 0.0241  | 0 K.GLVEGVYCNLTEAFEIPACK.Y |
| 162 - 176   | 1799.9123 | 1798.9050 | 1798.8382 | 0.0668  | 0 K.GYVLITCSWQNEMQK.R      |

No match to: 1396.1242, 1713.7213, 1769.9184

### 396 Ribonuclease-like protein 12

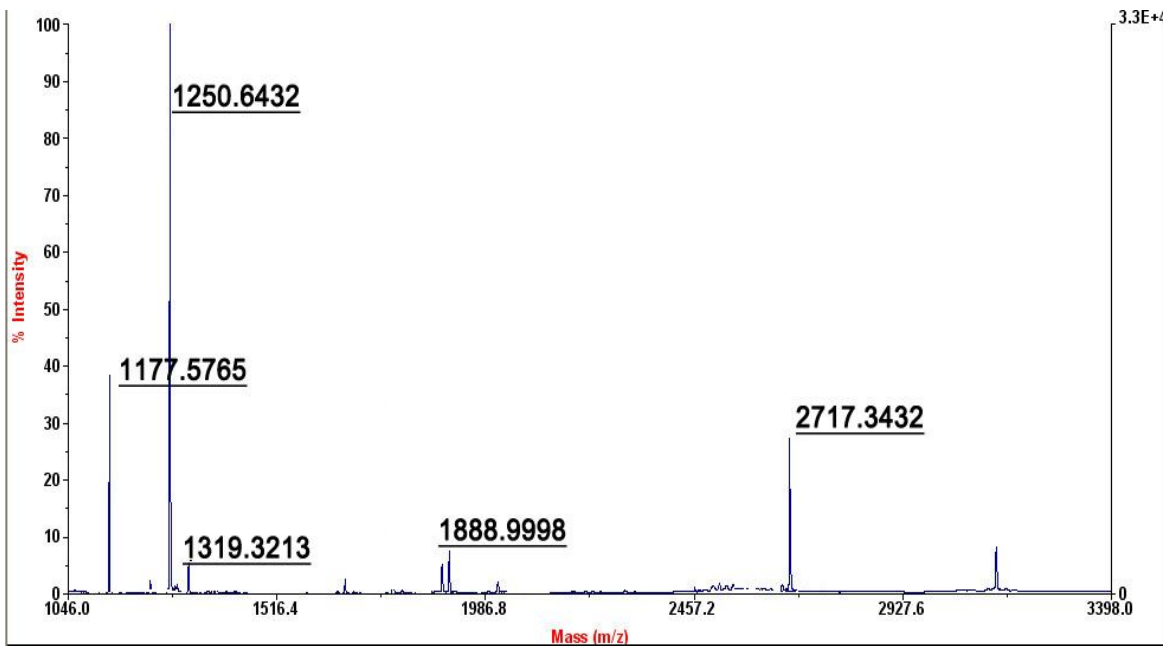

| Start - End | Observed  | Mr(expt)  | Mr(calc)  | Delta  | Miss Sequence           |
|-------------|-----------|-----------|-----------|--------|-------------------------|
| 45 - 53     | 1177.5765 | 1176.5692 | 1176.5532 | 0.0160 | 0 R.YCNHMIQR.V          |
| 86 - 102    | 1888.9998 | 1887.9925 | 1887.8859 | 0.1066 | 0 K.VACQNLSAIFCFQSETK.F |
| 105 - 115   | 1250.6432 | 1249.6359 | 1249.6159 | 0.0200 | 0 K.MTVCQLIEGTR.Y       |

No match to: 1319.3213, 2717.3432

397 Ribonuclease-like protein 13

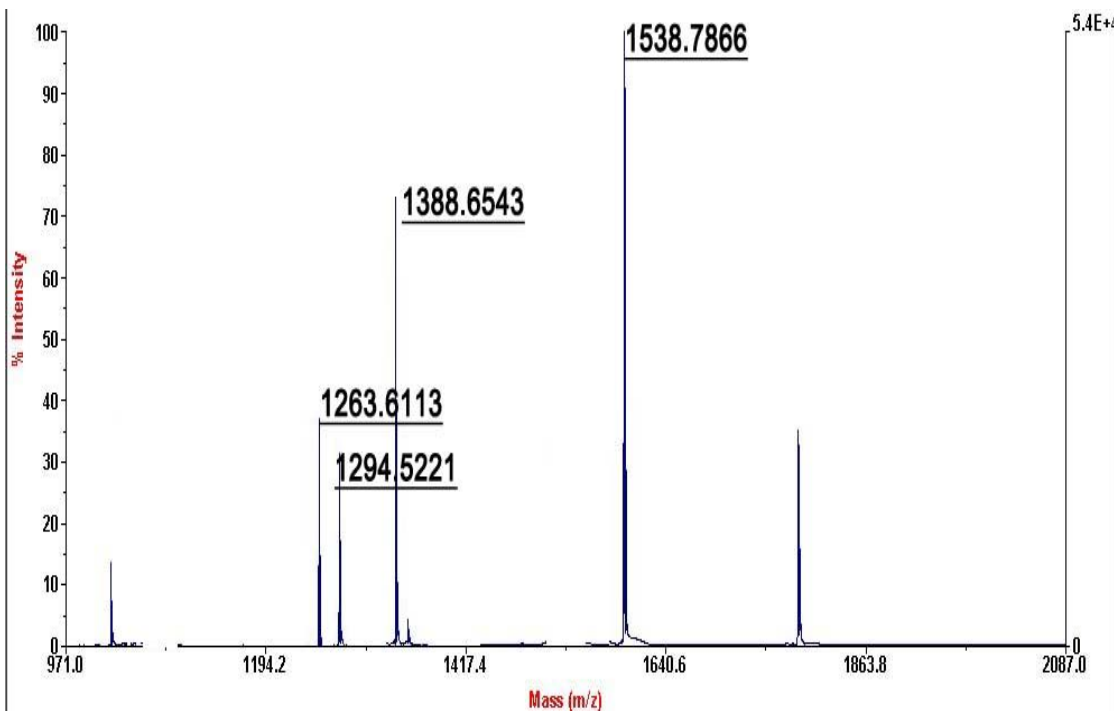

| Start - End | Observed | Mr(expt) | Mr(calc) | Delta | Miss Sequence |
|-------------|----------|----------|----------|-------|---------------|
|-------------|----------|----------|----------|-------|---------------|



|           |           |           |           |         |   |                    |
|-----------|-----------|-----------|-----------|---------|---|--------------------|
| 31 - 41   | 1388.6543 | 1387.6470 | 1387.6772 | -0.0302 | 0 | R.NFYTLSIDYPR.V    |
| 50 - 60   | 1294.5221 | 1293.5148 | 1293.5304 | -0.0156 | 0 | R.GYCNGLMASYMR.G   |
| 71 - 80   | 1263.6113 | 1262.6040 | 1262.6924 | -0.0884 | 0 | K.IHYVIHAPWK.A     |
| 142 - 156 | 1538.7866 | 1537.7793 | 1537.7664 | 0.0129  | 0 | K.YEADPIGIAGLYSL.- |

No match to: 1675.4532

398 Ribonuclease 4

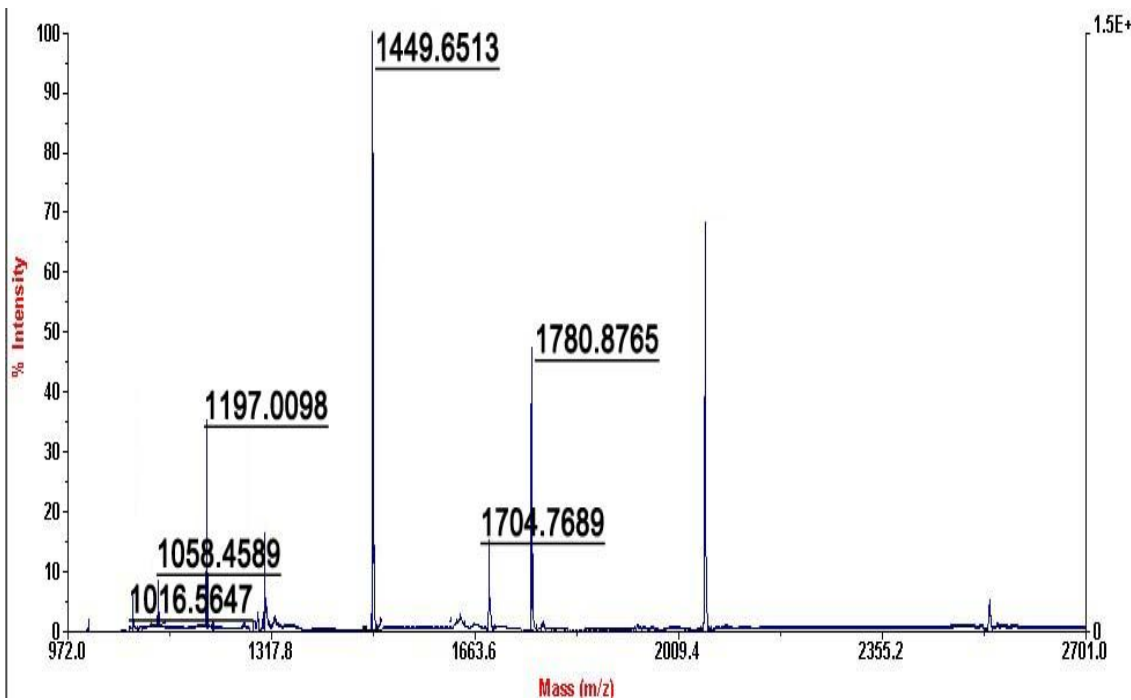

| Start - End | Observed  | Mr(expt)  | Mr(calc)  | Delta   | Miss Sequence           |
|-------------|-----------|-----------|-----------|---------|-------------------------|
| 52 - 59     | 1058.4589 | 1057.4516 | 1057.4507 | 0.0009  | 0 R.YCNLMMQR.R          |
| 70 - 82     | 1704.7689 | 1703.7616 | 1703.8420 | -0.0804 | 0 R.FNTFIHEDIWNIR.S     |
| 97 - 105    | 1016.5647 | 1015.5574 | 1015.4579 | 0.0995  | 0 K.MNCHEGVVK.V         |
| 131 - 147   | 1780.8765 | 1779.8692 | 1779.8614 | 0.0078  | 0 R.VVIACEGNPQVPVHFDG.- |

No match to: 1197.0098, 1449.6513, 2103.3321

399 Sperm-associated antigen 1

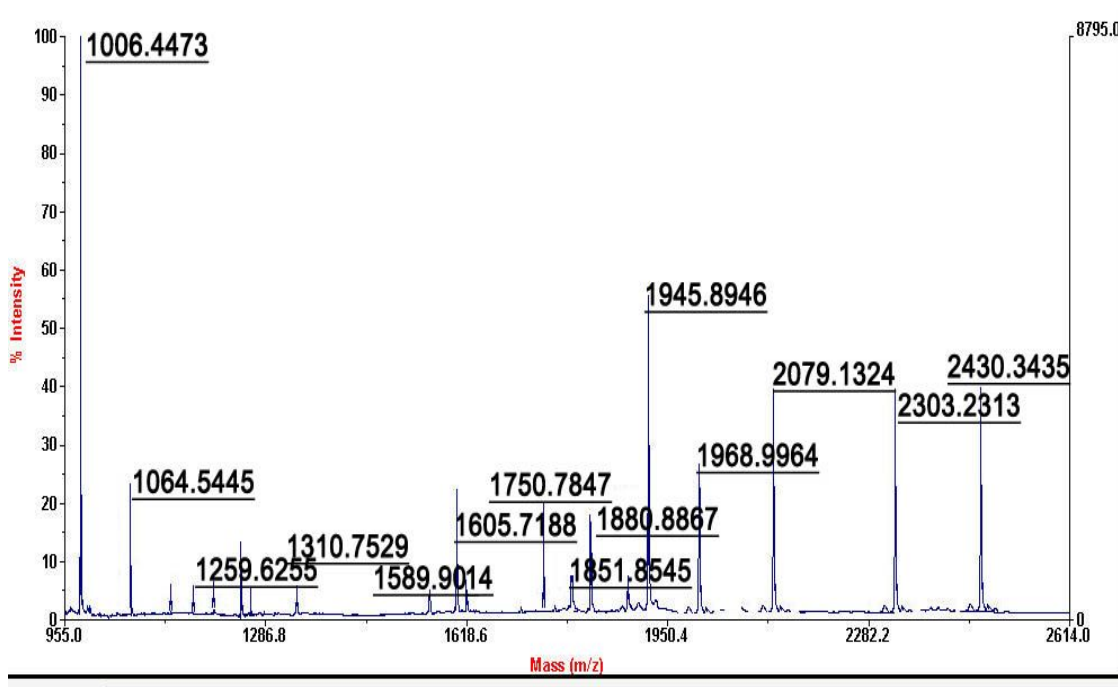

| Start - End                            | Observed  | Mr(expt)  | Mr(calc)  | Delta   | Miss Sequence                |
|----------------------------------------|-----------|-----------|-----------|---------|------------------------------|
| 48 - 63                                | 1880.8867 | 1879.8794 | 1879.7822 | 0.0972  | 0 R.SGEEGYYPELTEFCEK.H       |
| 78 - 94                                | 1851.8545 | 1850.8472 | 1850.8686 | -0.0214 | 0 K.DKPAATAASFTAEEWEK.I      |
| 113 - 125                              | 1605.7188 | 1604.7115 | 1604.7116 | -0.0000 | 0 K.MHFHETETFPAMK.D          |
| 255 - 267                              | 1582.6434 | 1581.6361 | 1581.6882 | -0.0520 | 0 K.LQNWNSAFQDCEK.V          |
| 422 - 449                              | 2303.2313 | 2302.2240 | 2302.1050 | 0.1190  | 0                            |
| <b>R.ASAAAAAGGGATGHPGGQGAENPAGLK.S</b> |           |           |           |         |                              |
| 580 - 599                              | 2079.1324 | 2078.1251 | 2078.1677 | -0.0425 | 0 K.LSPIAVPASVPLQAWHPAK.E    |
| 798 - 819                              | 2430.3435 | 2429.3362 | 2429.3066 | 0.0296  | 0 K.LPIAKPNNAYEFGQIINALSTR.K |
| 845 - 858                              | 1589.9001 | 1588.8929 | 1588.9076 | -0.0147 | 0 K.LEGDTFLLLIQSLK.N         |

No match to: 1750.7847, 1945.8946, 1968.9964

400 Glutathione S-transferase P

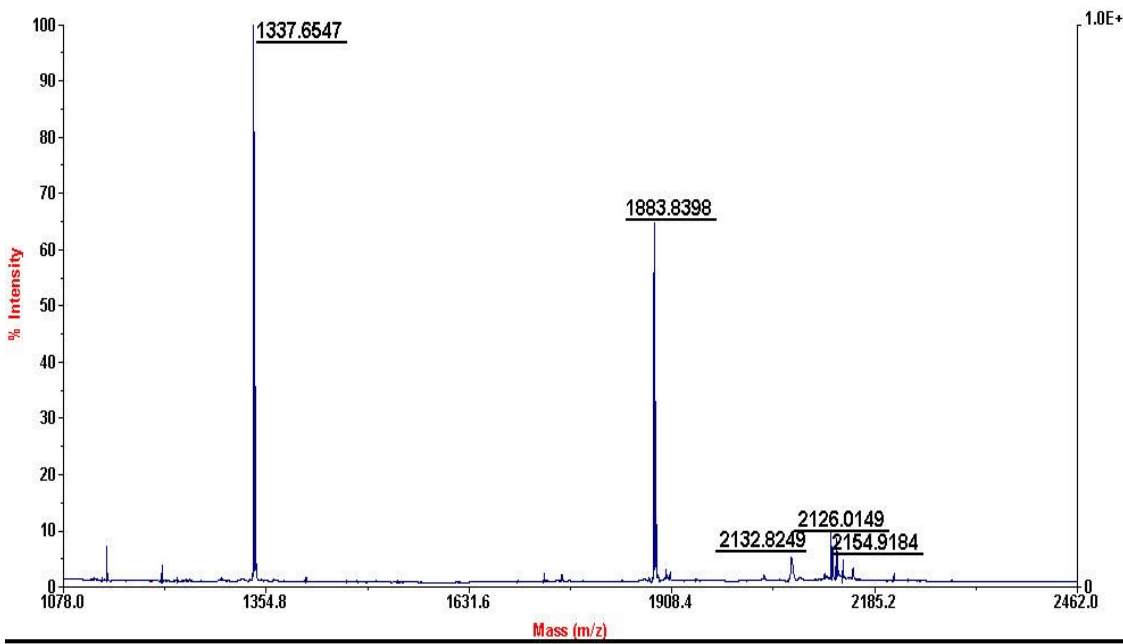

| Start - End | Observed  | Mr(expt)  | Mr(calc)  | Delta   | Miss Sequence             |
|-------------|-----------|-----------|-----------|---------|---------------------------|
| 2 - 12      | 1337.6547 | 1336.6474 | 1336.7180 | -0.0705 | 0 M.PPYTVVYFPVR.G         |
| 56 - 71     | 1883.8398 | 1882.8325 | 1882.9425 | -0.1100 | 0 K.FQDGLTLYQSNTILR.H     |
| 83 - 101    | 2132.8249 | 2131.8177 | 2131.9692 | -0.1515 | 0 K.DQQEAALVDMVNDGVEDLR.C |

Oxidation (M)

|           |           |           |           |         |                           |
|-----------|-----------|-----------|-----------|---------|---------------------------|
| 104 - 121 | 2154.9184 | 2153.9112 | 2154.0521 | -0.1409 | 1 K.YISLIYTNYEAGKDDYVK.A  |
| 122 - 141 | 2126.0149 | 2125.0076 | 2125.1531 | -0.1456 | 0 K.ALPGQLKPFETLLSQNGGK.T |

No match to: 1135.5812, 1212.6012, 2072.8229, 2140.8687

401 Glutathione S-transferase P

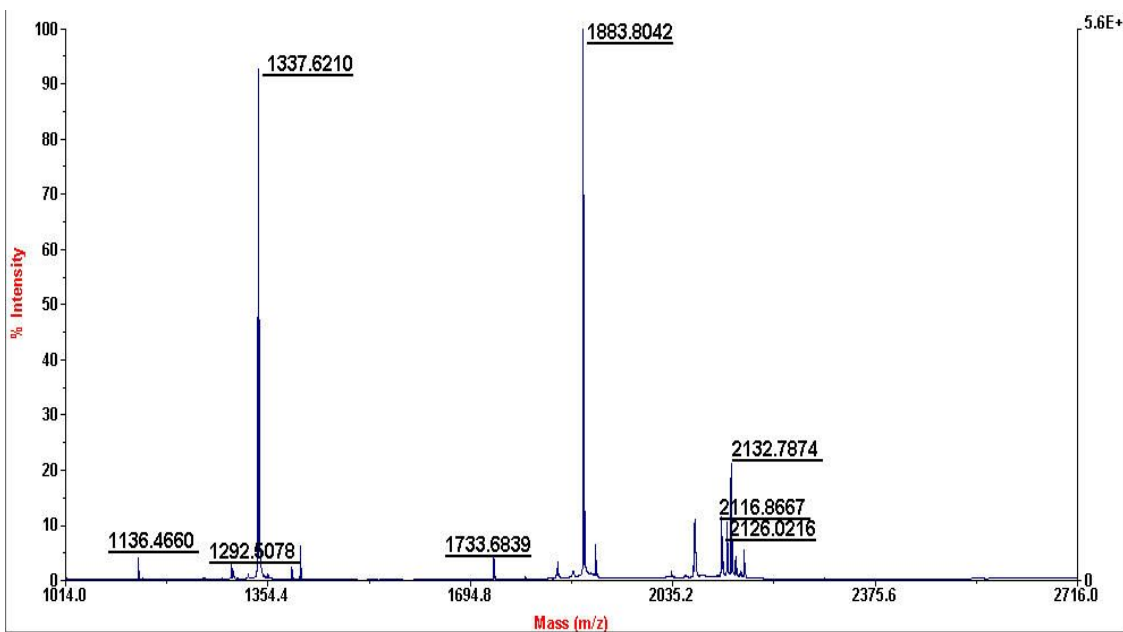

| Start - End   | Observed  | Mr(expt)  | Mr(calc)  | Delta   | Miss Sequence                   |
|---------------|-----------|-----------|-----------|---------|---------------------------------|
| 2 - 12        | 1337.6210 | 1336.6137 | 1336.7180 | -0.1042 | 0 M.PPYTVVYFPVR.G               |
| 20 - 30       | 1292.5078 | 1291.5005 | 1291.6231 | -0.1226 | 0 R.MLLADQGQSWK.E Oxidation (M) |
| 31 - 45       | 1733.6839 | 1732.6766 | 1732.8519 | -0.1753 | 0 K.EEVVTVETWQEGSLK.A           |
| 46 - 55       | 1136.4660 | 1135.4587 | 1135.5696 | -0.1108 | 0 K.ASCLYGQLPK.F                |
| 56 - 71       | 1883.8042 | 1882.7970 | 1882.9425 | -0.1455 | 0 K.FQDGDLTLYQSNTILR.H          |
| 83 - 101      | 2116.8667 | 2115.8595 | 2115.9743 | -0.1148 | 0 K.DQQEALVDMVNDGVEDLR.C        |
| 83 - 101      | 2132.7874 | 2131.7801 | 2131.9692 | -0.1890 | 0 K.DQQEALVDMVNDGVEDLR.C        |
| Oxidation (M) |           |           |           |         |                                 |
| 122 - 141     | 2126.0216 | 2125.0143 | 2125.1531 | -0.1389 | 0 K.ALPGQLKPFETLLSQNQGK.T       |

402 Platelet-activating factor acetylhydrolase IB subunit gamma

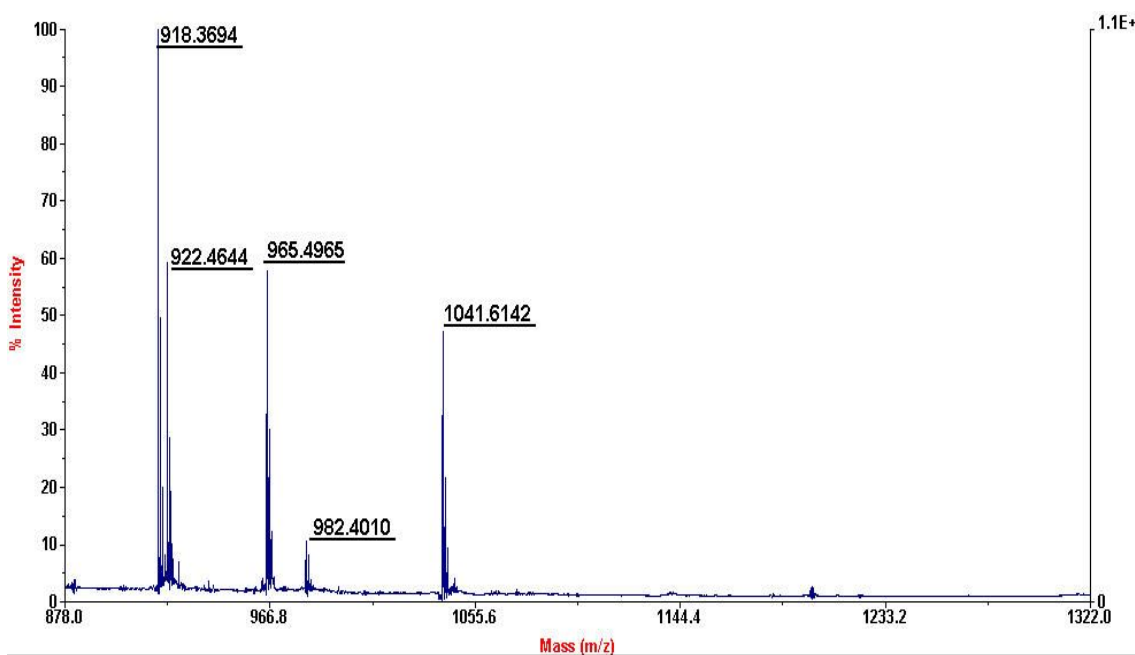

| Start - End | Observed  | Mr(expt)  | Mr(calc)  | Delta   | Miss Sequence               |
|-------------|-----------|-----------|-----------|---------|-----------------------------|
| 23 - 29     | 982.4010  | 981.3937  | 981.4603  | -0.0666 | 0 R.WMSLHHR.F Oxidation (M) |
| 119 - 127   | 1041.6142 | 1040.6069 | 1040.5978 | 0.0091  | 0 K.AIVQLVNER.Q             |
| 142 - 149   | 918.3694  | 917.3621  | 917.4831  | -0.1210 | 0 R.GQHNPPLR.E              |
| 199 - 206   | 965.4965  | 964.4893  | 964.4800  | 0.0092  | 0 R.LGYTPVCR.A              |
| 207 - 214   | 922.4644  | 921.4571  | 921.5760  | -0.1188 | 0 R.ALHSLLLR.L              |

No match to: 1200.8224, 1331.9398, 1435.1645, 1460.1562, 1798.7453, 1813.8400, 2211.3875

403 Ubiquinol-cytochrome c reductase iron-sulfur subunit

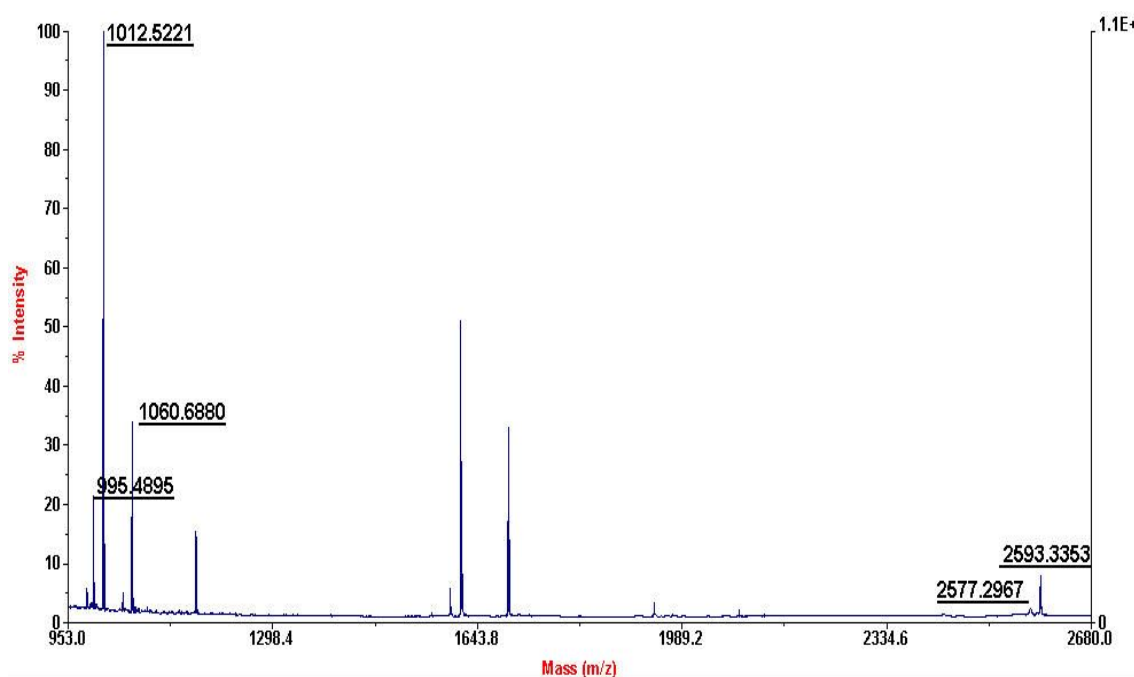

| Start - End | Observed  | Mr(expt)  | Mr(calc)  | Delta   | Miss Sequence                   |
|-------------|-----------|-----------|-----------|---------|---------------------------------|
| 85 - 92     | 1012.5221 | 1011.5149 | 1011.4662 | 0.0487  | 0 K.VPDFSEYR.R                  |
| 93 - 101    | 1060.6880 | 1059.6807 | 1059.5924 | 0.0883  | 1 R.RLEVLDSTK.S                 |
| 131 - 155   | 2593.3353 | 2592.3280 | 2592.3833 | -0.0552 | 1 K.NAVTQFVSSMSASADVLALAKIEIK.L |
| 197 - 204   | 995.4895  | 994.4822  | 994.4468  | 0.0354  | 0 R.DPQHDLDR.V                  |
| 251 - 274   | 2577.2967 | 2576.2894 | 2576.2720 | 0.0174  | 0 R.LGPAPLNLEVPTYEFTSDDMVIVG.-  |

No match to: 1168.7806, 1597.5697, 1615.5572, 1694.6455, 1942.1067

404 Cathepsin B precursor

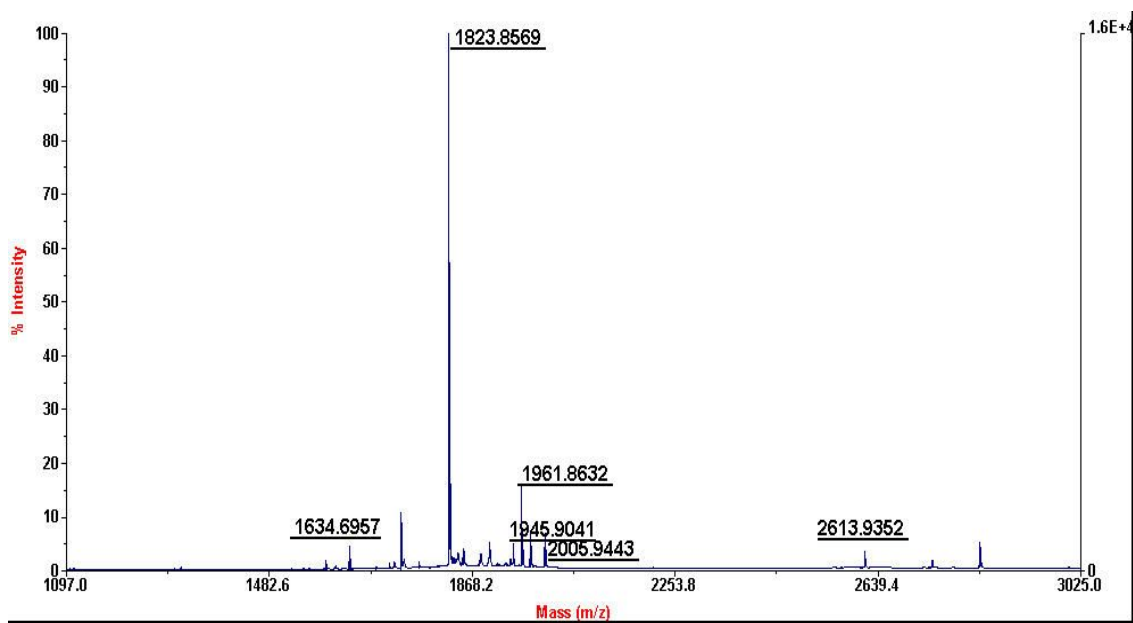

| Start - End   | Observed  | Mr(expt)  | Mr(calc)  | Delta   | Miss Sequence                |
|---------------|-----------|-----------|-----------|---------|------------------------------|
| 224 - 237     | 1634.6957 | 1633.6884 | 1633.7008 | -0.0124 | 0 K.HYGYNSYSVSNSEK.D         |
| 224 - 245     | 2613.9352 | 2612.9280 | 2613.1693 | -0.2413 | 1 K.HYGYNSYSVSNSEKDIMAEIYK.N |
| Oxidation (M) |           |           |           |         |                              |
| 246 - 263     | 2005.9443 | 2004.9371 | 2004.9833 | -0.0462 | 0 K.NGPVEGAFSVYSDFLLYK.S     |
| 264 - 281     | 1945.9041 | 1944.8968 | 1944.8935 | 0.0034  | 0 K.SGVYQHVTGEMMGGHAIR.I     |
| Oxidation (M) |           |           |           |         |                              |
| 264 - 281     | 1961.8632 | 1960.8559 | 1960.8884 | -0.0325 | 0 K.SGVYQHVTGEMMGGHAIR.I 2   |
| Oxidation (M) |           |           |           |         |                              |
| 315 - 331     | 1823.8569 | 1822.8496 | 1822.8632 | -0.0136 | 0 R.GQDHCGIESEVVAGIPR.T      |

No match to: 1732.8483, 1850.8702, 1899.9442, 1977.9029, 2741.2953, 2832.2365

405 arginine/serine-rich 3

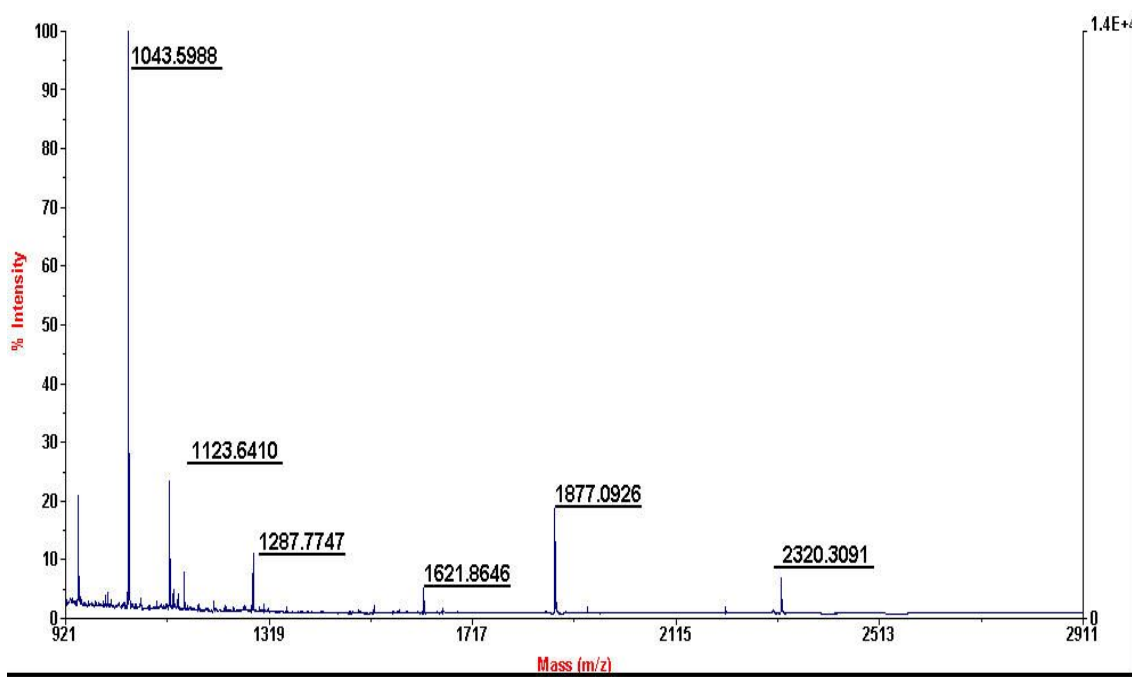

| Start - End | Observed  | Mr(expt)  | Mr(calc)  | Delta  | Miss Sequence             |
|-------------|-----------|-----------|-----------|--------|---------------------------|
| 12 - 28     | 1877.0926 | 1876.0853 | 1875.9439 | 0.1414 | 1 K.VYVGNLGNNGNKTELER.A   |
| 29 - 37     | 1043.5988 | 1042.5915 | 1042.5236 | 0.0679 | 0 R.AFGYYGPLR.S           |
| 38 - 57     | 2320.3091 | 2319.3018 | 2319.1437 | 0.1582 | 1 R.SVWVARNPPGFVFEFEDPR.D |
| 44 - 57     | 1621.8646 | 1620.8573 | 1620.7573 | 0.1000 | 0 R.NPPGFVFEFEDPR.D       |
| 58 - 69     | 1287.7747 | 1286.7674 | 1286.6215 | 0.1459 | 1 R.DAADAVRELDGR.T        |
| 89 - 98     | 1123.6410 | 1122.6337 | 1122.5683 | 0.0654 | 1 R.NRGPPPSWGR.R          |

No match to: 945.5402, 1152.8452, 1286.7904, 2304.4842

406 GTP-binding nuclear protein Ran

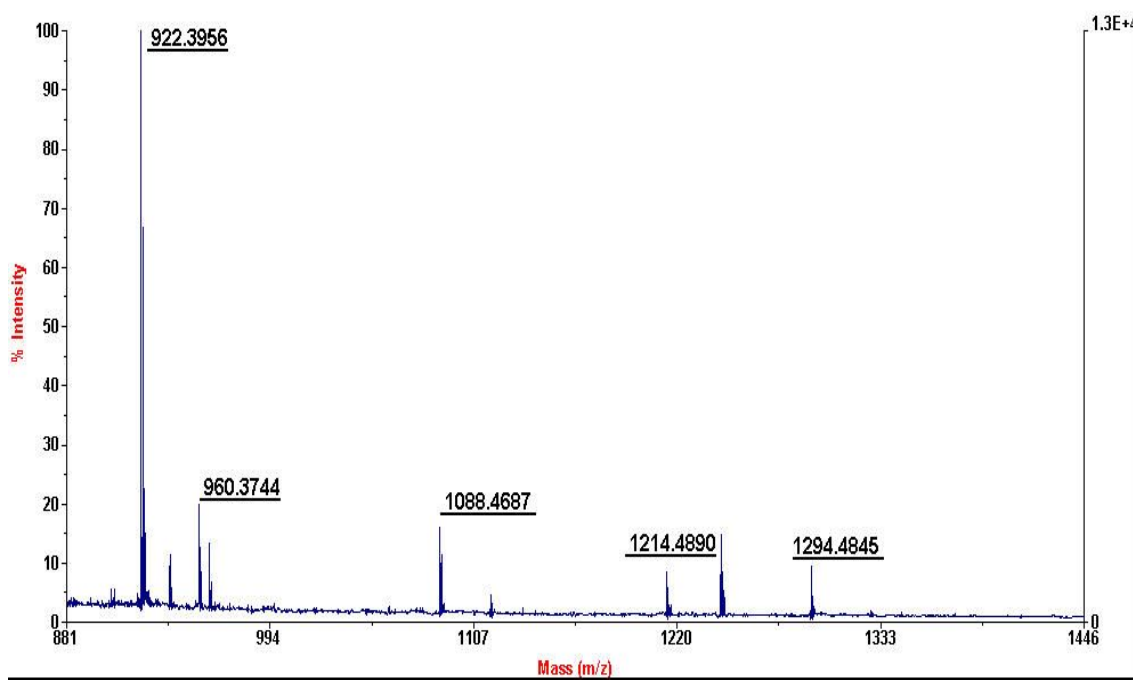

| Start - End | Observed  | Mr(expt)  | Mr(calc)  | Delta   | Miss Sequence     |
|-------------|-----------|-----------|-----------|---------|-------------------|
| 30 - 37     | 960.3744  | 959.3671  | 959.4712  | -0.1041 | 0 R.HLTGEFEK.K    |
| 30 - 38     | 1088.4687 | 1087.4614 | 1087.5662 | -0.1048 | 1 R.HLTGEFEKK.Y   |
| 61 - 71     | 1294.4845 | 1293.4772 | 1293.5990 | -0.1217 | 0 K.FNVWDTAGQEK.F |
| 100 - 106   | 922.3956  | 921.3883  | 921.4569  | -0.0686 | 0 K.NVPNWHR.D     |
| 143 - 152   | 1214.4890 | 1213.4817 | 1213.5979 | -0.1162 | 0 K.NLQYYDISAK.S  |

No match to: 954.3745, 1244.4876, 1784.6901, 1800.7127, 1816.6979

407 Huntingtin-associated protein 1 (HAP-1)



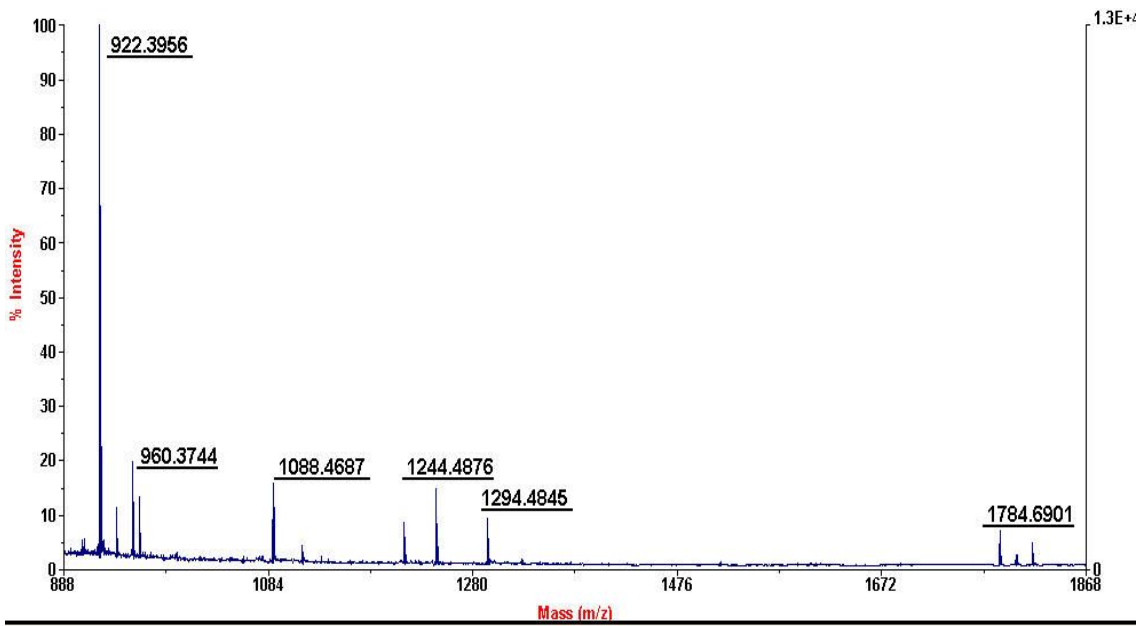

| Start - End | Observed  | Mr(expt)  | Mr(calc)  | Delta   | Miss Sequence                    |
|-------------|-----------|-----------|-----------|---------|----------------------------------|
| 6 - 14      | 922.3956  | 921.3883  | 921.4273  | -0.0390 | 1 R.LGRCCAGSR.L                  |
| 139 - 147   | 954.3745  | 953.3672  | 953.5043  | -0.1371 | 0 R.RPGVSGPER.A                  |
| 168 - 175   | 960.3744  | 959.3671  | 959.5287  | -0.1616 | 1 K.KITQEDVK.V                   |
| 217 - 227   | 1294.4845 | 1293.4772 | 1293.5871 | -0.1098 | 0 K.QNSVLMEEENSK.L Oxidation (M) |
| 398 - 407   | 1244.4876 | 1243.4804 | 1243.5325 | -0.0522 | 1 R.CRMYGAEOTEK.L                |
| 535 - 550   | 1784.6901 | 1783.6829 | 1783.8120 | -0.1292 | 0 R.GFEAEGLMLAADIMR.G 2          |

Oxidation (M)

No match to: 1088.4687, 1214.4890, 1800.7127, 1816.6979

408 Flavin reductase

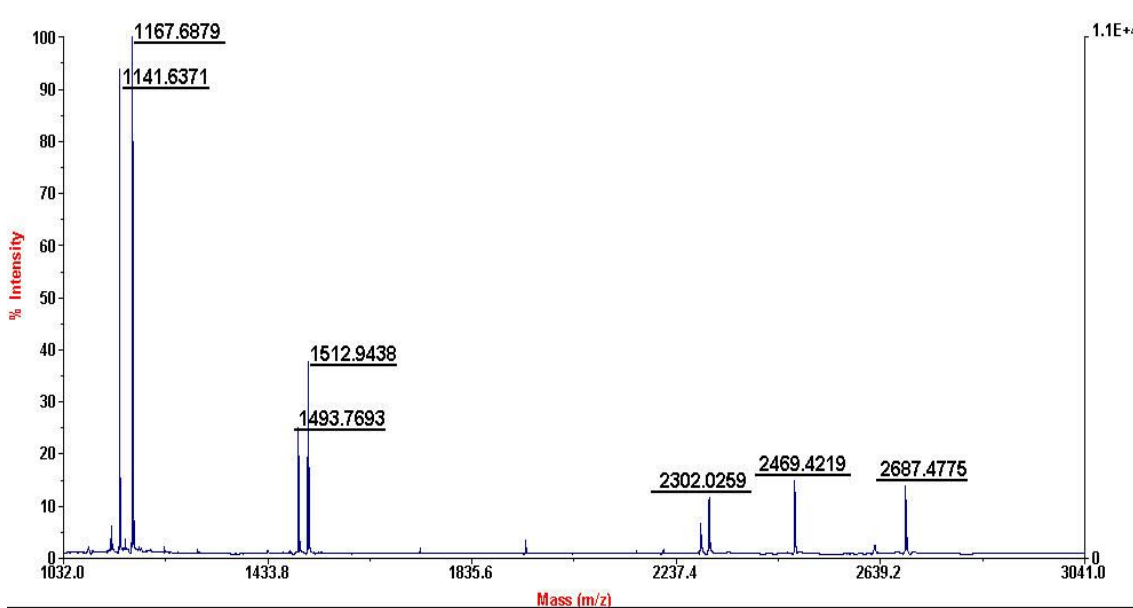

| Start - End | Observed | Mr(expt) | Mr(calc) | Delta | Miss Sequence |
|-------------|----------|----------|----------|-------|---------------|
|-------------|----------|----------|----------|-------|---------------|

40 - 63 2469.4219 2468.4146 2468.3024 0.1122 0

R.LPSEGPRPAHVVVGDVLQAADVDK.T

64 - 78 1512.9438 1511.9365 1511.8672 0.0694 0 K.TVAGQDAVIVLLGTR.N

79 - 92 1493.7693 1492.7620 1492.6828 0.0792 0 R.NDLSPTTVMSEGAR.N Oxidation (M)

125 - 134 1167.6879 1166.6806 1166.6044 0.0762 0 R.LQAVTDDHIR.M

146 - 170 2687.4775 2686.4702 2686.3425 0.1277 0

K.YVAVMPPHIGDQPLTGAYTVTLTGDR.G Oxidation (M)

179 - 187 1141.6371 1140.6298 1140.5499 0.0800 0 K.HDLGHFMLR.C Oxidation (M)

188 - 206 2302.0259 2301.0186 2300.9281 0.0906 0 R.CLTDEYDGHSTYPHQYQ.-

No match to: 1166.7295, 1941.0442, 2285.0308, 2627.2849

409 Annexin A5

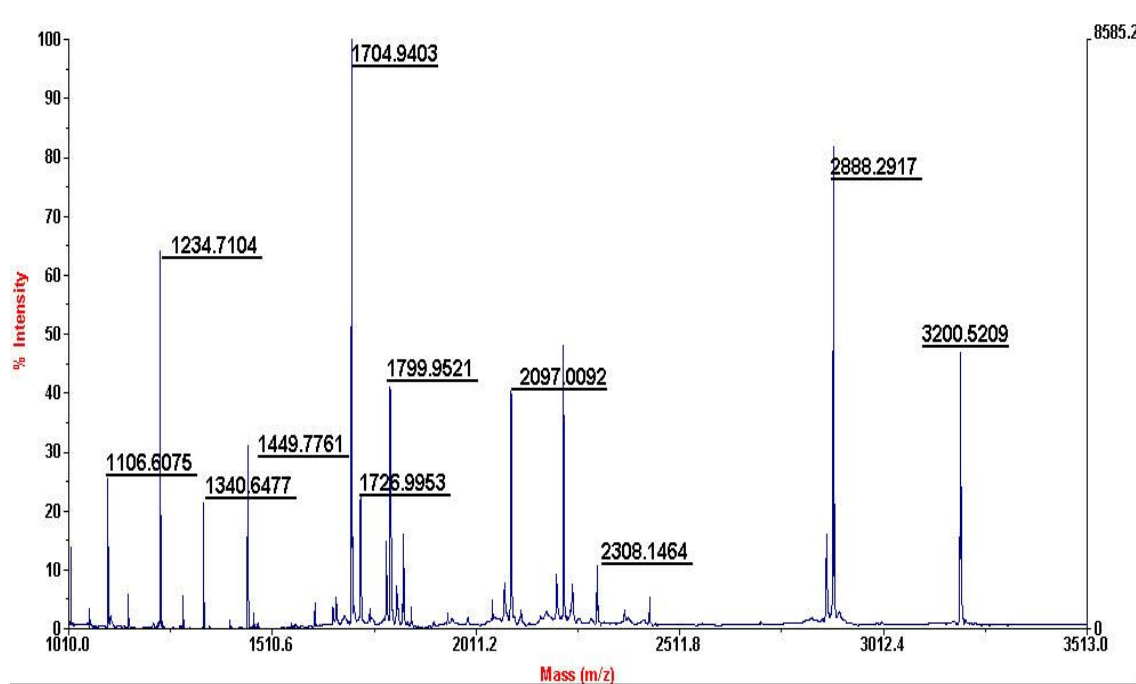

| Start - End | Observed  | Mr(expt)  | Mr(calc)  | Delta  | Miss Sequence             |
|-------------|-----------|-----------|-----------|--------|---------------------------|
| 7 - 18      | 1340.6477 | 1339.6404 | 1339.6045 | 0.0359 | 0 R.GTVTDFPGFDER.A        |
| 7 - 25      | 2097.0092 | 2096.0019 | 2095.9811 | 0.0209 | 1 R.GTVTDFPGFDERADAETLR.K |
| 30 - 45     | 1704.9403 | 1703.9331 | 1703.8941 | 0.0389 | 0 K.GLGTDEESILTLTSLR.S    |
| 46 - 58     | 1449.7761 | 1448.7688 | 1448.7372 | 0.0317 | 1 R.SNAQRQEISAAFK.T       |
| 109 - 123   | 1726.9953 | 1725.9880 | 1725.9625 | 0.0256 | 1 K.VLTEIIASRTPEELR.A     |

124 - 151 3200.5209 3199.5136 3199.4469 0.0667 1

R.AIKQVYEEEEYGSSLEDDVVGDTSGYYQR.M

127 - 151 2888.2917 2887.2844 2887.2308 0.0536 0

K.QVYEEEEYGSSLEDDVVGDTSGYYQR.M

187 - 201 1799.9521 1798.9448 1798.8890 0.0558 1 K.WGTDEEKFITIFGTR.S

209 - 227 2308.1464 2307.1391 2307.1093 0.0298 1 K.VFDKYMTISGFQIEETIDR.E

Oxidation (M)

277 - 285 1106.6075 1105.6003 1105.5768 0.0235 0 R.SEIDLFNIR.K

277 - 286 1234.7104 1233.7031 1233.6717 0.0314 1 R.SEIDLFNIRK.E

No match to: 1790.9447, 1831.9190, 2225.0803

410 Mimecan precursor

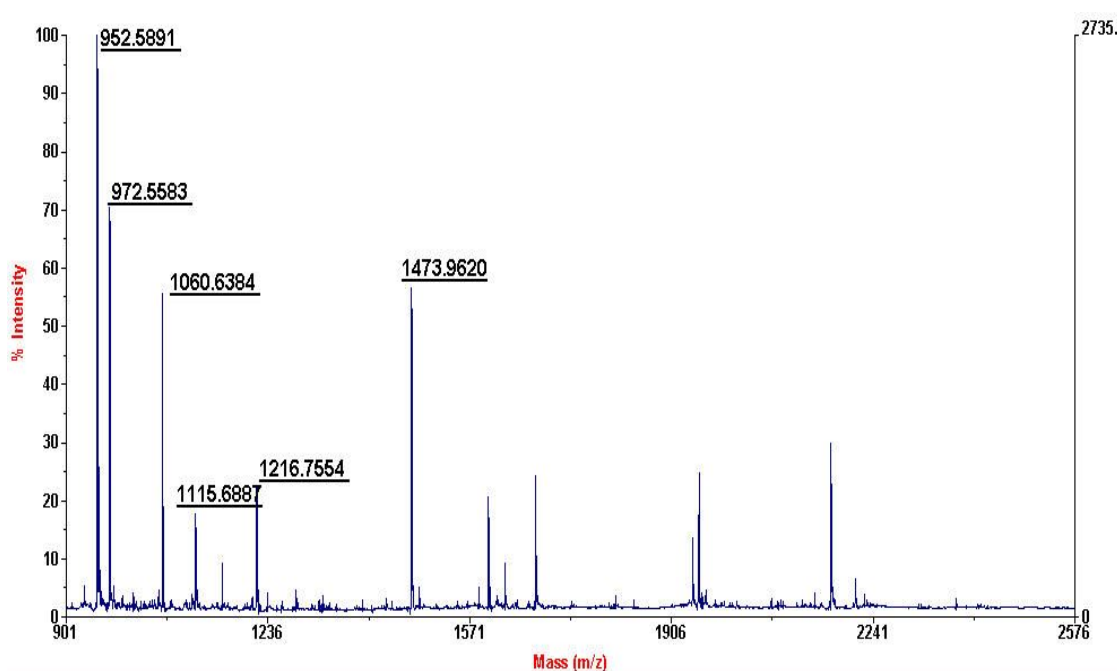

| Start - End | Observed  | Mr(expt)  | Mr(calc)  | Delta  | Miss Sequence       |
|-------------|-----------|-----------|-----------|--------|---------------------|
| 120 - 127   | 972.5583  | 971.5510  | 971.4712  | 0.0798 | 0 K.ESAYLYAR.F      |
| 134 - 146   | 1473.9620 | 1472.9548 | 1472.7987 | 0.1560 | 1 K.LTAKDFADIPNLR.R |
| 138 - 146   | 1060.6384 | 1059.6311 | 1059.5349 | 0.0962 | 0 K.DFADIPNLR.R     |
| 138 - 147   | 1216.7554 | 1215.7481 | 1215.6360 | 0.1121 | 1 K.DFADIPNLR.L     |
| 282 - 290   | 1115.6887 | 1114.6814 | 1114.5593 | 0.1221 | 0 K.HPNSFICKL.R     |

291 - 298 952.5891 951.5818 951.5178 0.0640 1 K.RLPIGSYF.-

No match to: 1630.1013, 1680.1820, 1941.1836, 1951.2983, 2170.3899

411

Nicotinate-nucleotide pyrophosphorylase

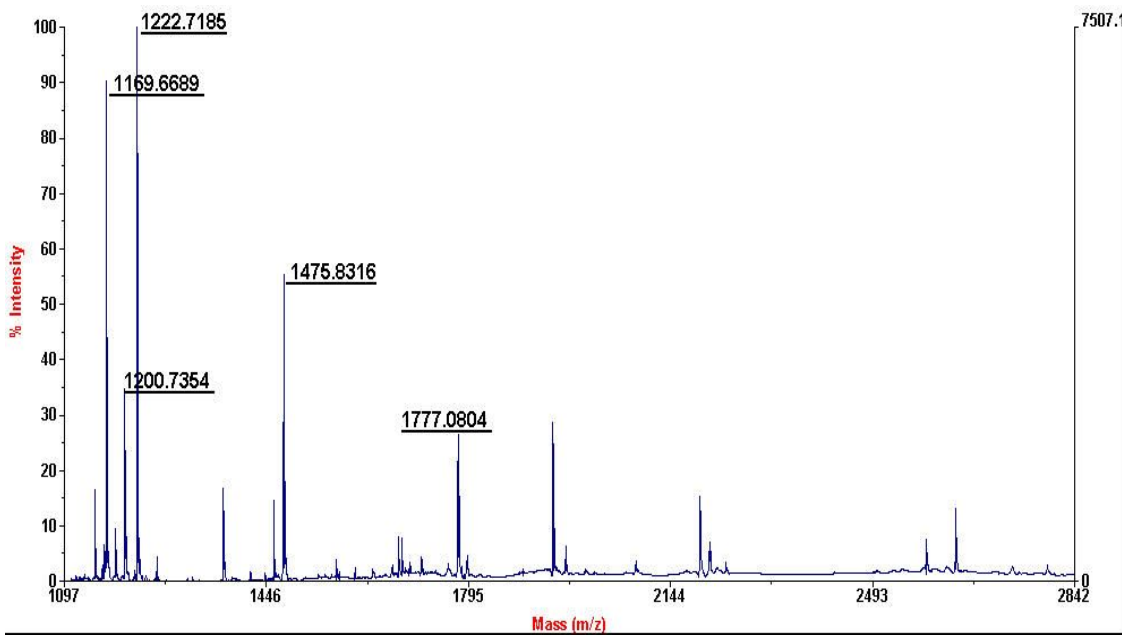

| Start - End | Observed  | Mr(expt)  | Mr(calc)  | Delta  | Miss Sequence          |
|-------------|-----------|-----------|-----------|--------|------------------------|
| 87 - 102    | 1777.0804 | 1776.0731 | 1775.9465 | 0.1266 | 1 R.VAEVRGPAHCLLLGER.V |
| 92 - 102    | 1222.7185 | 1221.7112 | 1221.6288 | 0.0824 | 0 R.GPAHCLLLGER.V      |
| 111 - 126   | 1475.8316 | 1474.8244 | 1474.7198 | 0.1046 | 0 R.CSGIASAAAAVEAAR.G  |
| 127 - 138   | 1169.6689 | 1168.6616 | 1168.5738 | 0.0878 | 0 R.GAGWTGHVAGTR.K     |
| 150 - 161   | 1200.7354 | 1199.7281 | 1199.6411 | 0.0870 | 0 K.YGLLVGGAASHR.Y     |

No match to: 1018.6349, 1149.6703, 1185.6635, 1371.7683, 1458.8040

412 Annexin A4 (Annexin IV)

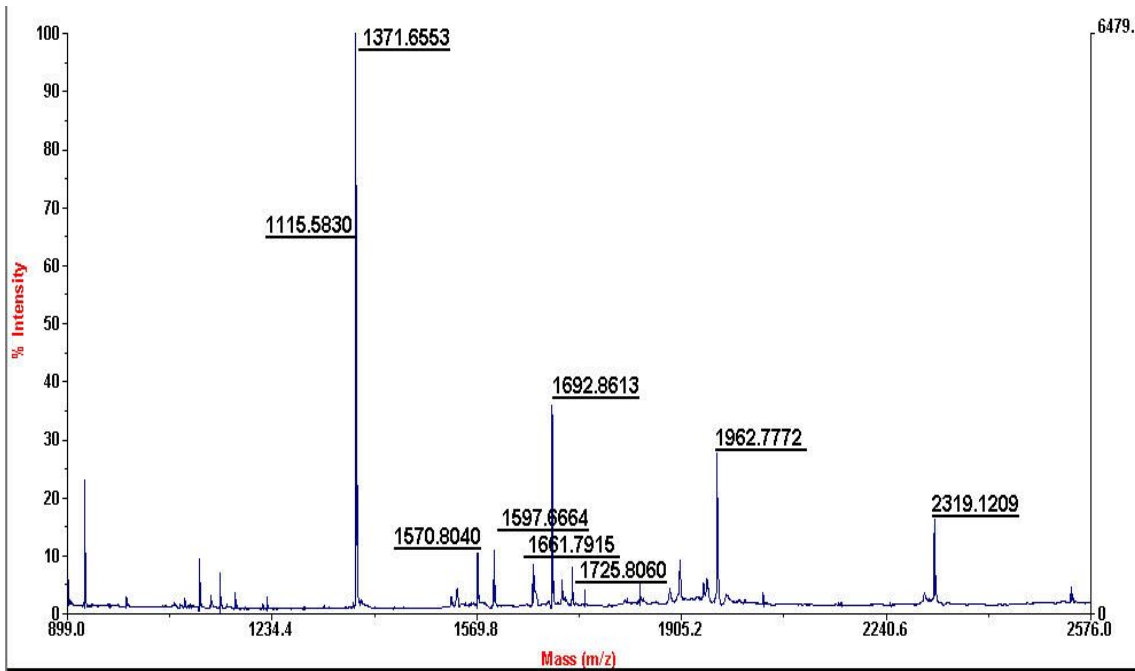

| Start - End   | Observed  | Mr(expt)  | Mr(calc)  | Delta   | Miss Sequence |                                |
|---------------|-----------|-----------|-----------|---------|---------------|--------------------------------|
| 10 - 24       | 1597.6664 | 1596.6591 | 1596.7202 | -0.0611 | 0             | K.AASGFNAMEDAQTLR.K Oxidation  |
| (M)           |           |           |           |         |               |                                |
| 10 - 25       | 1725.8060 | 1724.7987 | 1724.8152 | -0.0165 | 1             | K.AASGFNAMEDAQTLR.K.A          |
| Oxidation (M) |           |           |           |         |               |                                |
| 29 - 44       | 1692.8613 | 1691.8540 | 1691.8730 | -0.0190 | 0             | K.GLGTDEDALISVLAYR.N           |
| 45 - 53       | 1115.5830 | 1114.5757 | 1114.5843 | -0.0086 | 1             | R.NTAQRQEIR.T                  |
| 101 - 116     | 1661.7915 | 1660.7842 | 1660.8090 | -0.0248 | 0             | K.GAGTDEGCLIEILASR.T           |
| 124 - 134     | 1371.6553 | 1370.6481 | 1370.6579 | -0.0098 | 0             | R.ISQTYQQYGR.S                 |
| 135 - 150     | 1962.7772 | 1961.7699 | 1961.8789 | -0.1090 | 1             | R.SLEDDIRSDTSFMFQR.V Oxidation |
| (M)           |           |           |           |         |               |                                |
| 151 - 172     | 2319.1209 | 2318.1136 | 2318.1866 | -0.0730 | 1             | R.VLVSLSAGGRDEGNYLDDALVR.Q     |
| 203 - 214     | 1570.8040 | 1569.7967 | 1569.8052 | -0.0085 | 1             | R.NHLLHVFDEYKR.I               |

No match to: 1149.5820

413 Delta(3,5)-Delta(2,4)-dienoyl-CoA isomerase, mitochondrial precursor

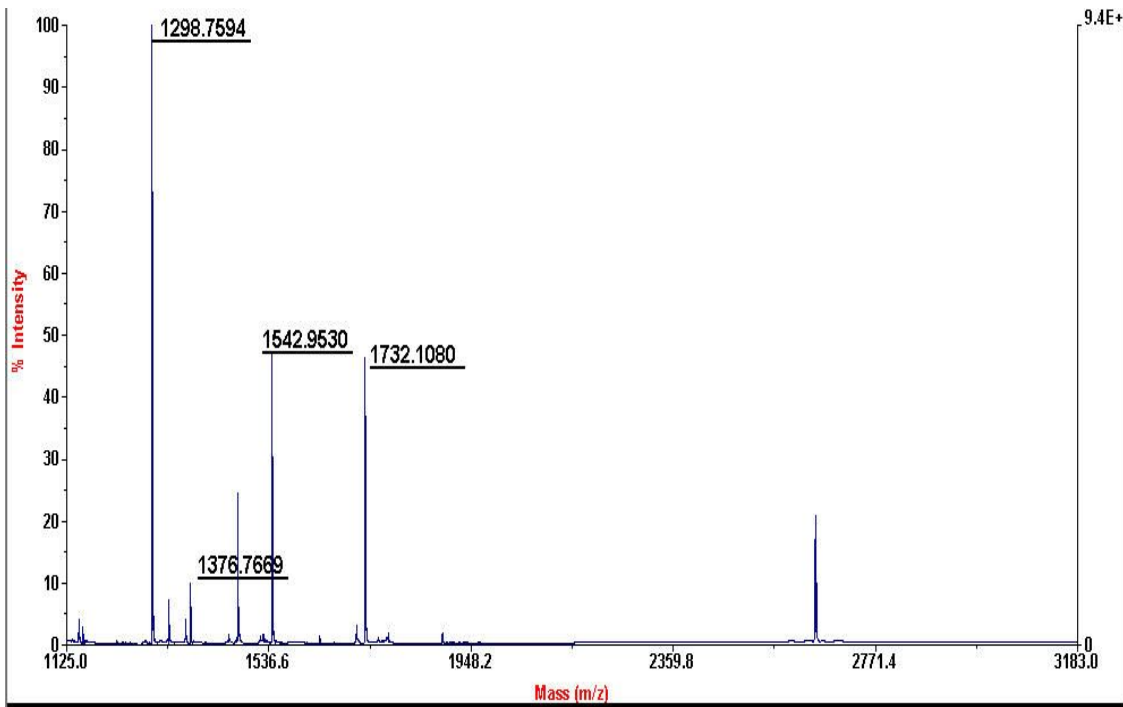

| Start - End | Observed  | Mr(expt)  | Mr(calc)  | Delta  | Miss Sequence         |
|-------------|-----------|-----------|-----------|--------|-----------------------|
| 96 - 103    | 992.6241  | 991.6168  | 991.4505  | 0.1663 | 1 K.ISRDADCR.A        |
| 149 - 158   | 1298.7594 | 1297.7521 | 1297.6302 | 0.1219 | 0 R.YQETFNVIER.C      |
| 186 - 196   | 1376.7669 | 1375.7596 | 1375.6231 | 0.1365 | 0 R.YCAQDAFFQVK.E     |
| 197 - 211   | 1542.9530 | 1541.9458 | 1541.8049 | 0.1408 | 0 K.EVDVGLAADVGTLR.L  |
| 215 - 230   | 1732.1080 | 1731.1007 | 1730.9315 | 0.1692 | 0 K.VIGNQSLVNELAFAR.K |

No match to: 1149.6959, 1157.7777, 1366.7884, 1472.8203, 1518.8623, 2648.4377

414 Sialic acid synthase

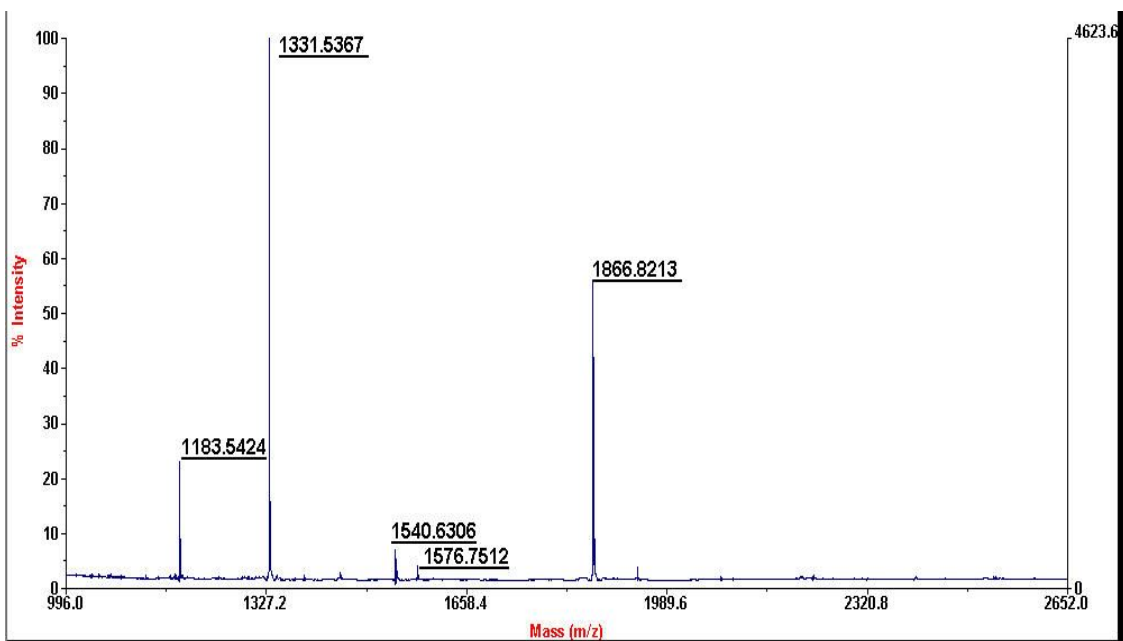

| Start - End | Observed | Mr(expt) | Mr(calc) | Delta | Miss Sequence |
|-------------|----------|----------|----------|-------|---------------|
|-------------|----------|----------|----------|-------|---------------|

|           |           |           |           |         |   |                        |
|-----------|-----------|-----------|-----------|---------|---|------------------------|
| 42 - 52   | 1183.5424 | 1182.5351 | 1182.4831 | 0.0520  | 1 | R.MAKECGADCAK.F        |
| 80 - 86   | 890.4253  | 889.4180  | 889.4406  | -0.0226 | 1 | K.TYGEHKR.H            |
| 87 - 96   | 1331.5367 | 1330.5294 | 1330.6054 | -0.0760 | 0 | R.HLEFSDHQYR.E         |
| 132 - 145 | 1540.6306 | 1539.6233 | 1539.7205 | -0.0972 | 0 | K.VGSGDTNNFPYLEK.T     |
| 247 - 264 | 1866.8213 | 1865.8140 | 1865.9119 | -0.0979 | 0 | K.GSDHSASLEPGELAEIVR.S |
| 321 - 334 | 1576.7512 | 1575.7439 | 1575.8297 | -0.0858 | 1 | K.GYPPEDIFNLVGKK.V     |

No match to: 1050.4893

415 Thioredoxin-like protein 1

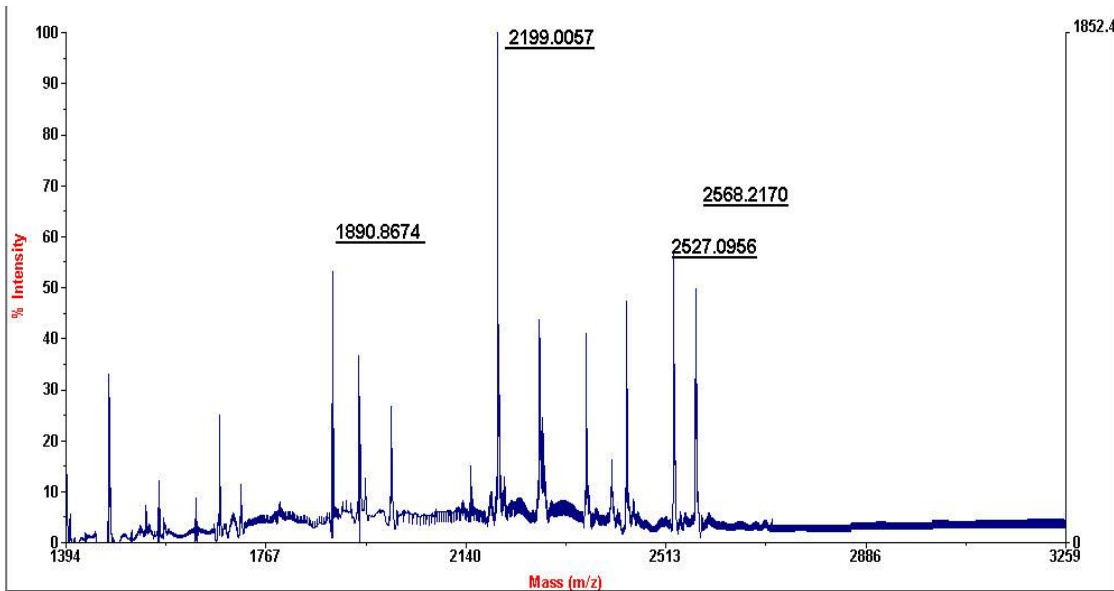

| Start - End | Observed  | Mr(expt)  | Mr(calc)  | Delta   | Miss Sequence                 |
|-------------|-----------|-----------|-----------|---------|-------------------------------|
| 2 - 23      | 2199.0057 | 2197.9984 | 2198.0968 | -0.0983 | 0 M.VGVKPVGSDPDFQPELSGAGSR.L  |
| 86 - 102    | 1890.8674 | 1889.8601 | 1889.9483 | -0.0882 | 1 K.VRIDQYQGADAVGLEEK.I       |
| 212 - 234   | 2568.2170 | 2567.2097 | 2567.2966 | -0.0869 | 1 R.SEPTQALELTEDDIKEDGIVPLR.Y |
| 238 - 259   | 2527.0956 | 2526.0883 | 2526.1987 | -0.1103 | 0 K.FQNVNSVTIFVQSNQGEETTR.I   |

No match to: 1060.4992, 1283.5925, 1999.8223, 2276.8515

416 Scavenger mRNA decapping enzyme DcpS

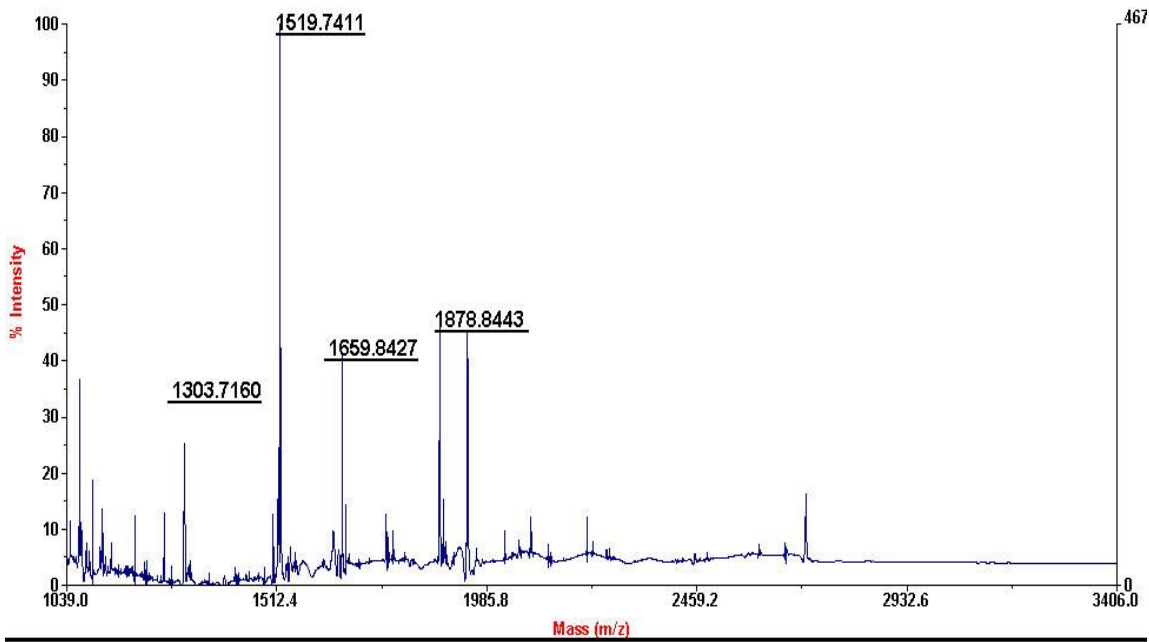

| Start - End | Observed  | Mr(expt)  | Mr(calc)  | Delta   | Miss Sequence          |
|-------------|-----------|-----------|-----------|---------|------------------------|
| 229 - 242   | 1659.8427 | 1658.8354 | 1658.9468 | -0.1114 | 1 R.SLRDLTPEHLPLLR.N   |
| 232 - 242   | 1303.7160 | 1302.7088 | 1302.7296 | -0.0208 | 0 R.DLTPEHLPLLR.N      |
| 243 - 255   | 1519.7411 | 1518.7338 | 1518.8266 | -0.0928 | 0 R.NILHQQQEAILQR.Y    |
| 295 - 310   | 1878.8443 | 1877.8370 | 1877.9305 | -0.0935 | 0 R.AHLLAEVIENLECDPR.H |

No match to: 1066.0622, 1940.8027

417 Aldose reductase

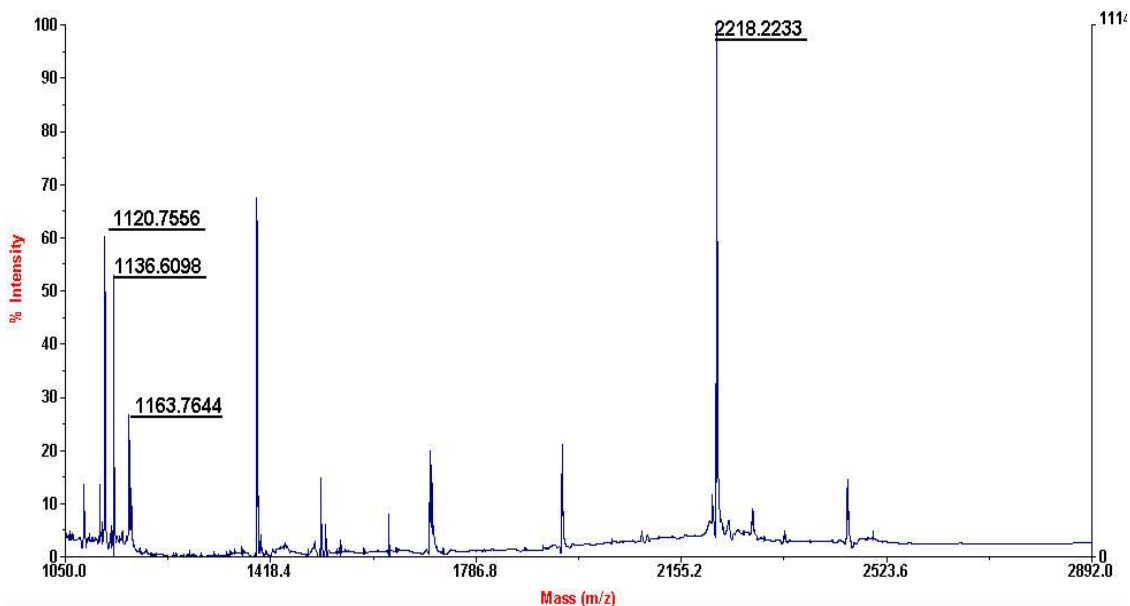

| Start - End | Observed  | Mr(expt)  | Mr(calc)  | Delta  | Miss Sequence   |
|-------------|-----------|-----------|-----------|--------|-----------------|
| 34 - 41     | 892.6052  | 891.5979  | 891.4814  | 0.1165 | 0 K.VAIDVGYR.H  |
| 70 - 78     | 1120.7556 | 1119.7484 | 1119.6288 | 0.1196 | 1 K.REELFIVSK.L |



|           |           |           |           |        |   |                        |
|-----------|-----------|-----------|-----------|--------|---|------------------------|
| 79 - 86   | 1136.6098 | 1135.6025 | 1135.5121 | 0.0904 | 0 | K.LWCTYHEK.G           |
| 91 - 101  | 1163.7644 | 1162.7572 | 1162.6016 | 0.1556 | 1 | K.GACQKTLSDLK.L        |
| 178 - 195 | 2218.2233 | 2217.2160 | 2217.0888 | 0.1272 | 0 | K.YKPAVNQIECHPYLTQEK.L |

No match to: 1393.8529, 1508.8061

#### 418 Annexin A2

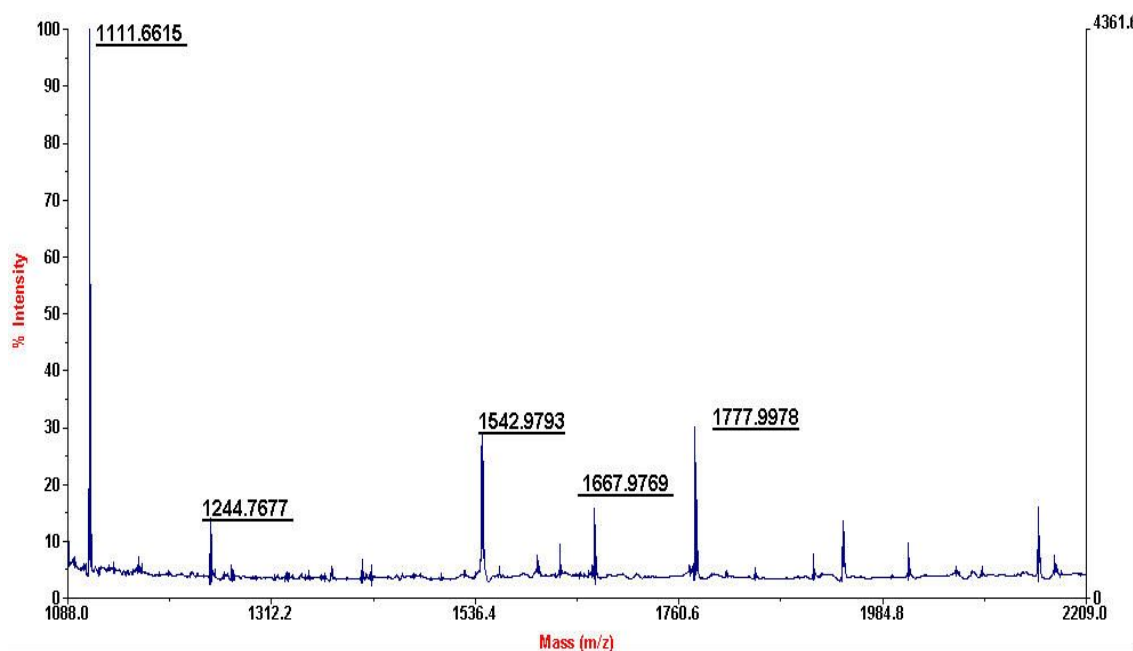

| Start - End | Observed  | Mr(expt)  | Mr(calc)  | Delta  | Miss Sequence          |
|-------------|-----------|-----------|-----------|--------|------------------------|
| 50 - 63     | 1542.9793 | 1541.9721 | 1541.8413 | 0.1307 | 0 K.GVDEVTIVNILTNR.S   |
| 64 - 77     | 1667.9769 | 1666.9696 | 1666.8175 | 0.1521 | 1 R.SNAQRQDIAFAYQR.R   |
| 69 - 77     | 1111.6615 | 1110.6543 | 1110.5458 | 0.1085 | 0 R.QDIAFAYQR.R        |
| 120 - 135   | 1777.9978 | 1776.9905 | 1776.8564 | 0.1341 | 0 K.GLGTDEDSLIEIICSR.T |
| 136 - 145   | 1244.7677 | 1243.7604 | 1243.6156 | 0.1448 | 0 R.TNQELQEINR.V       |
| 228 - 233   | 827.5206  | 826.5133  | 826.4337  | 0.0796 | 1 K.VFDRYK.S           |

No match to: 1940.0790, 2155.2687

#### 419 Fructose-bisphosphate aldolase

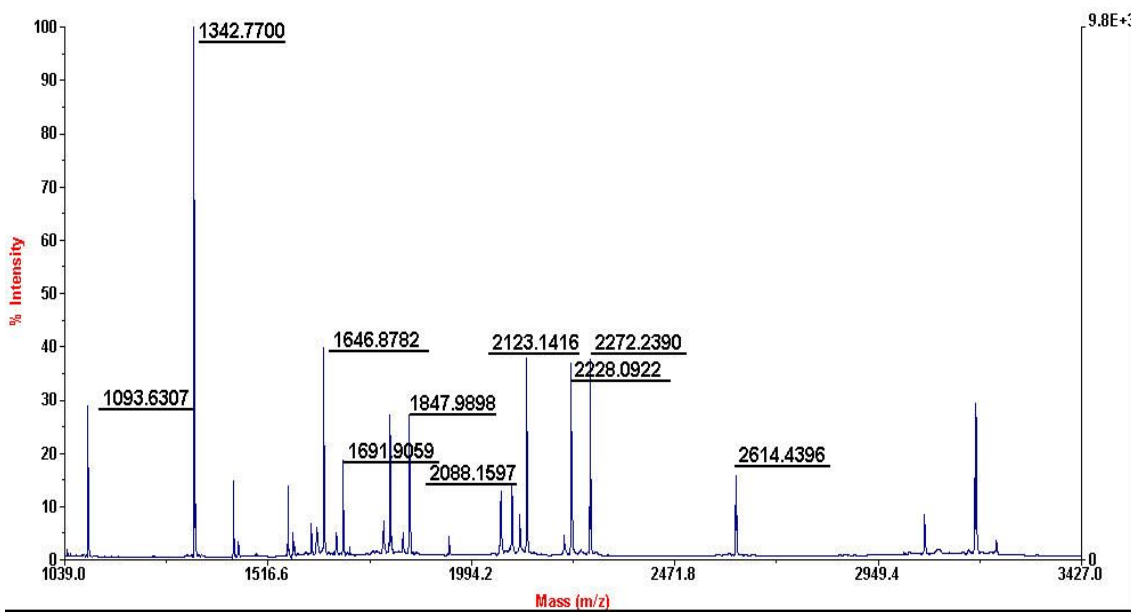

| Start - End   | Observed  | Mr(expt)  | Mr(calc)  | Delta  | Miss Sequence                       |
|---------------|-----------|-----------|-----------|--------|-------------------------------------|
| 44 - 57       | 1646.8782 | 1645.8709 | 1645.8019 | 0.0690 | 1 R.LQSIGTENTEENRR.F                |
| 70 - 87       | 2088.1597 | 2087.1525 | 2087.0874 | 0.0651 | 0 R.VNPCIGGVILFHETLYQK.A            |
| 88 - 99       | 1342.7700 | 1341.7627 | 1341.7041 | 0.0586 | 0 K.ADDGRPPQVIK.S                   |
| 109 - 134     | 2614.4396 | 2613.4323 | 2613.3246 | 0.1077 | 1<br>K.VDKGVVPLAGTNGETTTQGLDGLSER.C |
| 112 - 134     | 2272.2390 | 2271.2318 | 2271.1343 | 0.0975 | 0 K.GVVPLAGTNGETTTQGLDGLSER.C       |
| 154 - 173     | 2123.1416 | 2122.1343 | 2122.0840 | 0.0503 | 0 K.IGEHTPSALAIMENANVLAR.Y          |
| Oxidation (M) |           |           |           |        |                                     |
| 244 - 258     | 1691.9059 | 1690.8986 | 1690.8348 | 0.0638 | 0 K.FSHEEIAMATVTALR.R Oxidation     |
| (M)           |           |           |           |        |                                     |
| 244 - 259     | 1847.9898 | 1846.9825 | 1846.9359 | 0.0465 | 1 K.FSHEEIAMATVTALRR.T Oxidation    |
| (M)           |           |           |           |        |                                     |
| 323 - 331     | 1093.6307 | 1092.6235 | 1092.5563 | 0.0671 | 1 K.AAQEEYVKR.A                     |
| 343 - 364     | 2228.0922 | 2227.0849 | 2227.0182 | 0.0667 | 0 K.YTPSGQAGAAASESLFVSNHAY.-        |

No match to: 1802.9870, 2062.4017, 3175.7207

420 Inorganic pyrophosphatase

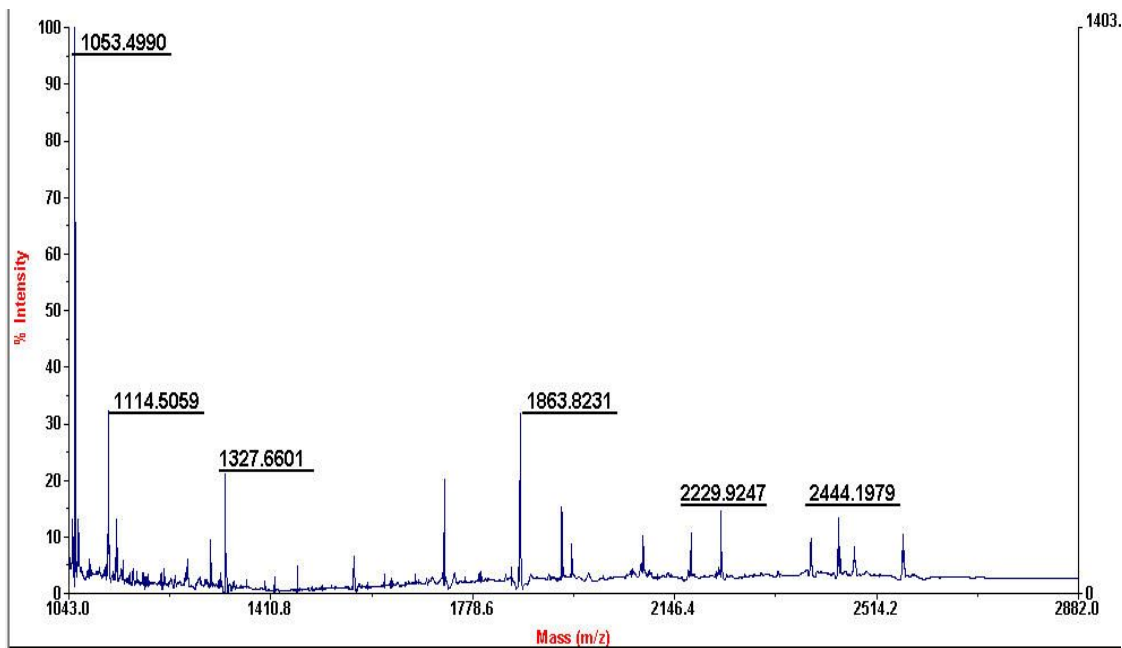

| Start - End | Observed  | Mr(expt)  | Mr(calc)  | Delta   | Miss Sequence                |
|-------------|-----------|-----------|-----------|---------|------------------------------|
| 10 - 18     | 1053.4990 | 1052.4917 | 1052.5291 | -0.0373 | 0 R.AAPFSLEYR.V              |
| 26 - 41     | 1863.8231 | 1862.8159 | 1862.9203 | -0.1044 | 0 K.GQYISPFHDIPIYADK.D       |
| 42 - 52     | 1327.6601 | 1326.6529 | 1326.6755 | -0.0226 | 0 K.DVFHMVVEVPR.W            |
| 80 - 88     | 1114.5059 | 1113.4986 | 1113.5859 | -0.0873 | 0 R.YVANLFPYK.G              |
| 156 - 177   | 2444.1979 | 2443.1906 | 2443.1979 | -0.0073 | 1 K.VIAINVDDPDAANYNDINDVKR.L |
| 193 - 211   | 2229.9247 | 2228.9174 | 2229.0742 | -0.1568 | 1 R.YKVPDGKPENEFANAEFK.D     |

No match to: 954.3945, 1561.6852

421 Beta-2-glycoprotein 1 precursor

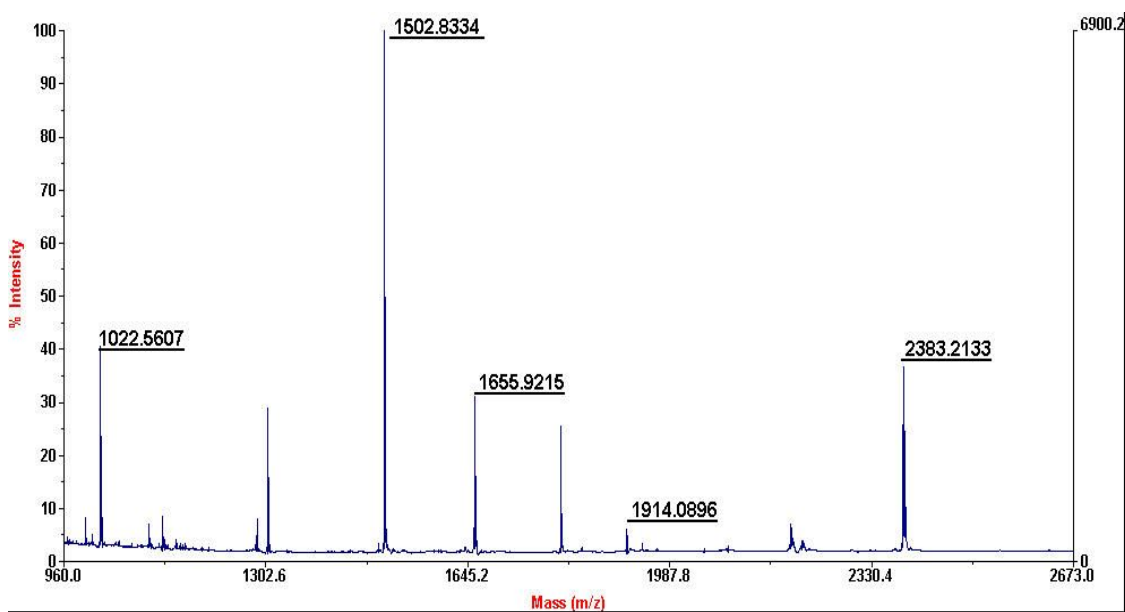

| Start - End | Observed | Mr(expt) | Mr(calc) | Delta | Miss Sequence |
|-------------|----------|----------|----------|-------|---------------|
|-------------|----------|----------|----------|-------|---------------|

|           |           |           |           |        |   |                                |
|-----------|-----------|-----------|-----------|--------|---|--------------------------------|
| 22 - 38   | 1914.0896 | 1913.0823 | 1912.9969 | 0.0854 | 0 | R.TCPKPDDLPFSTVVPLK.T          |
| 39 - 58   | 2383.2133 | 2382.2060 | 2382.0838 | 0.1222 | 0 | K.TFYEPGEEITYSCKPGYVSR.G       |
| 83 - 96   | 1502.8334 | 1501.8261 | 1501.7711 | 0.0550 | 0 | R.VCPFAGILENGAVR.Y             |
| 271 - 279 | 1022.5607 | 1021.5535 | 1021.5193 | 0.0342 | 0 | K.ATVVYQGER.V                  |
| 288 - 301 | 1655.9215 | 1654.9143 | 1654.7596 | 0.1547 | 1 | K.NGMLHGDKVSFFCK.N ; Oxidation |

(M)

No match to: 1305.7659, 1656.9171, 1802.9974

422 Fibrinogen beta chain precursor

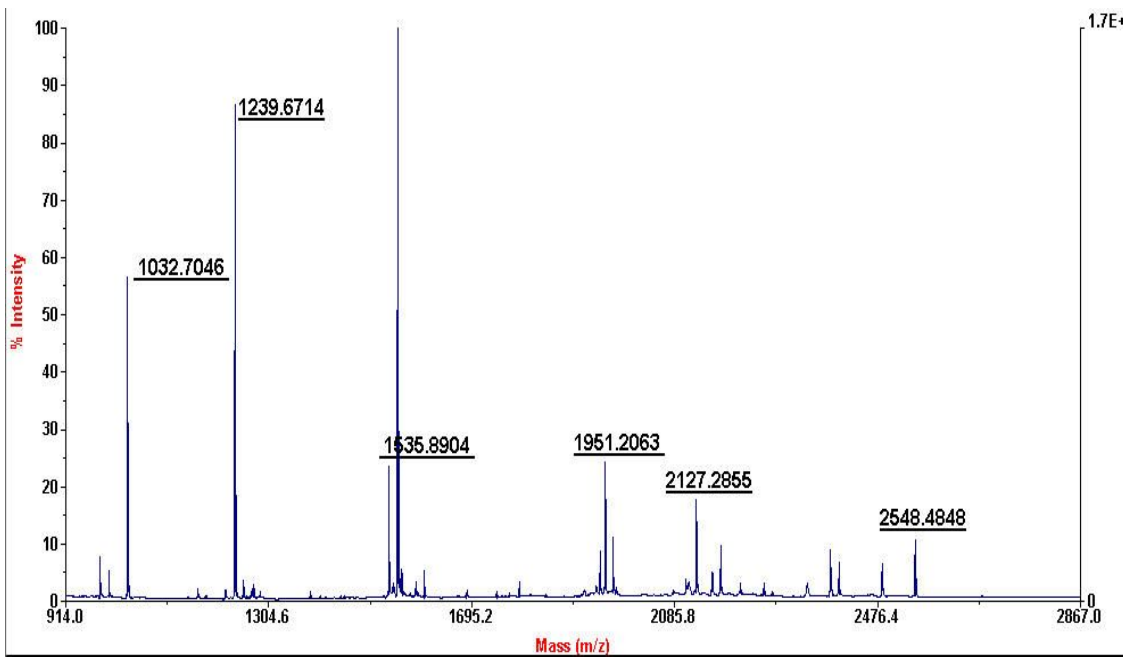

| Start - End | Observed  | Mr(expt)  | Mr(calc)  | Delta  | Miss Sequence                  |
|-------------|-----------|-----------|-----------|--------|--------------------------------|
| 54 - 72     | 1951.2063 | 1950.1990 | 1949.9959 | 0.2031 | 0 R.EEAPSLRPAPPPISGGGYR.A      |
| 179 - 196   | 2127.2855 | 2126.2782 | 2126.0756 | 0.2026 | 0 K.HQLYIDETVNSNIPTNLR.V       |
| 225 - 246   | 2548.4848 | 2547.4775 | 2547.2131 | 0.2644 | 1 R.TPCTVSCNIPVVSQKECEEIIR.K 3 |
| 354 - 367   | 1535.8904 | 1534.8832 | 1534.7164 | 0.1667 | 0 K.AHYGGFTVQNEANK.Y           |
| 427 - 436   | 1239.6714 | 1238.6641 | 1238.5105 | 0.1537 | 0 K.EDGGGWYNR.C                |
| 484 - 491   | 1032.7046 | 1031.6973 | 1031.5553 | 0.1421 | 0 K.IRPFFPQQ.-                 |

No match to: 1552.8549, 1967.2303, 2384.4039

423 Exostosin-like 3

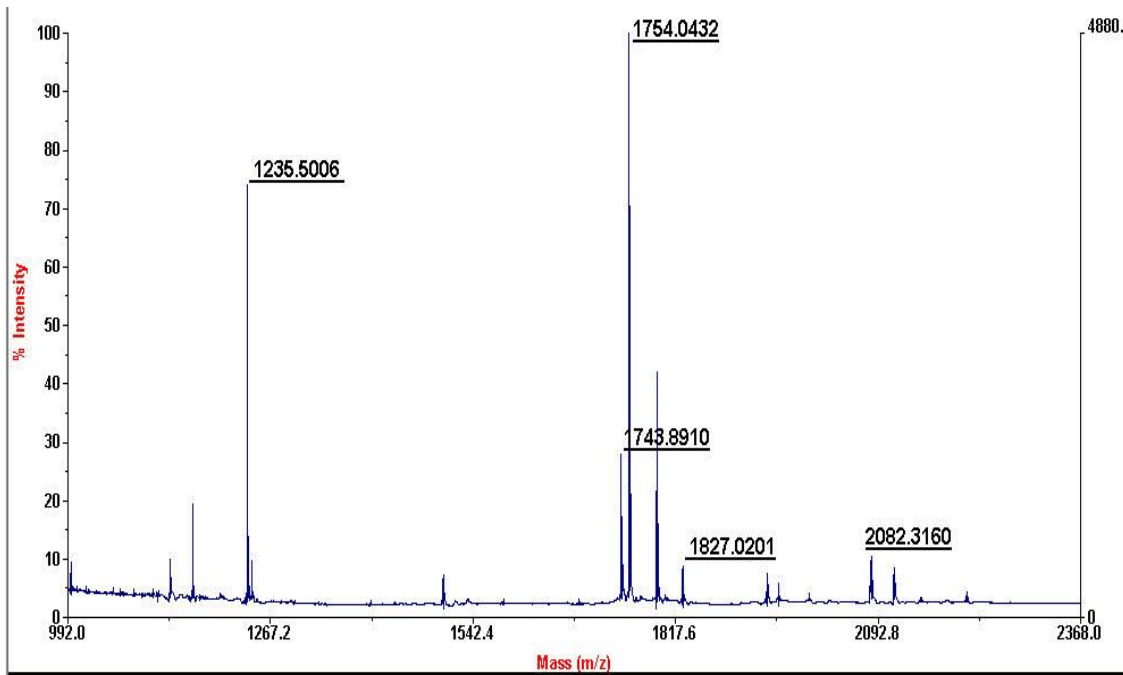

| Start - End | Observed  | Mr(expt)  | Mr(calc)  | Delta   | Miss Sequence                   |
|-------------|-----------|-----------|-----------|---------|---------------------------------|
| 69 - 84     | 1827.0201 | 1826.0128 | 1825.9179 | 0.0950  | 1 R.VGNELCEVKHVLDCR.I           |
| 85 - 99     | 1743.8910 | 1742.8838 | 1742.9414 | -0.0576 | 1 R.IRESVSEELLQLEAK.R           |
| 144 - 158   | 1754.0432 | 1753.0359 | 1752.9556 | 0.0803  | 1 K.ELMAQNQPKLSLPIR.L Oxidation |
| (M)         |           |           |           |         |                                 |
| 538 - 556   | 2082.3160 | 2081.3087 | 2081.1381 | 0.1706  | 1 R.IQIPAAPIREEAAAEIPHR.S       |
| 673 - 682   | 1235.5006 | 1234.4934 | 1234.5863 | -0.0930 | 0 R.EEVLMNSLER.L Oxidation (M)  |

No match to: 1942.1022

424 Argininosuccinate synthase

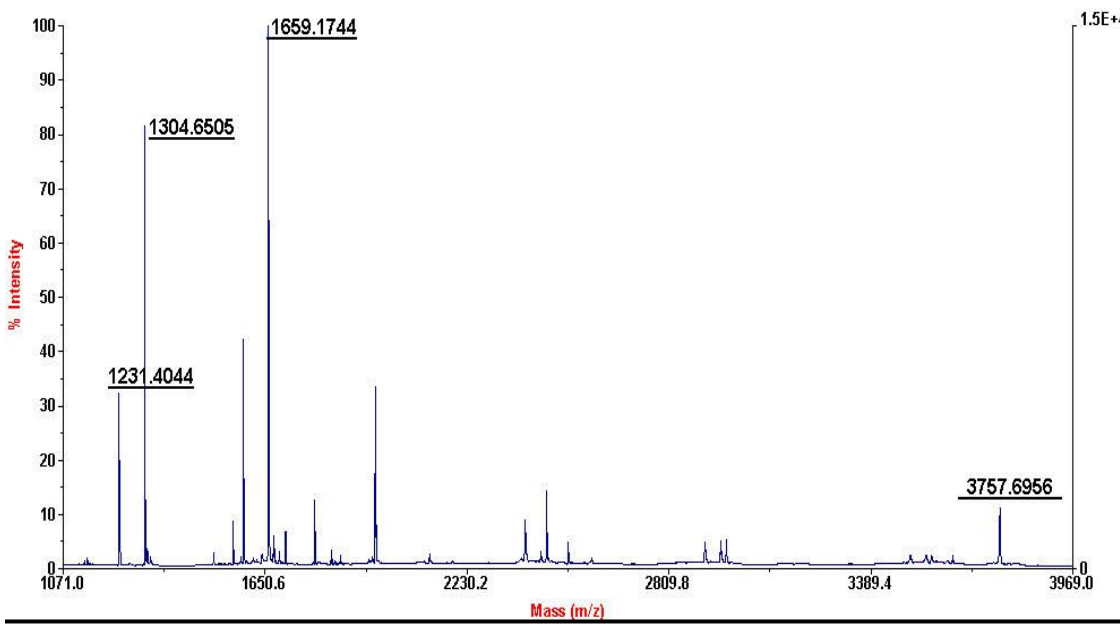

| Start - End | Observed  | Mr(expt)  | Mr(calc)  | Delta   | Miss Sequence                              |
|-------------|-----------|-----------|-----------|---------|--------------------------------------------|
| 109 - 121   | 1304.6505 | 1303.6432 | 1303.6521 | -0.0089 | 1 R.EGAKYVSHGATGK.G                        |
| 147 - 155   | 1231.4044 | 1230.3971 | 1230.5855 | -0.1884 | 1 R.MPEFYNRFK.G                            |
| 177 - 209   | 3757.6956 | 3756.6883 | 3756.7915 | -0.1033 | 1<br>K.NPWSMDENLMHISYEAGILENPKNQAPPGLYTK.T |
| 349 - 363   | 1659.1744 | 1658.1672 | 1657.9879 | 0.1792  | 1 K.VQVSVLKGQVYILGR.E                      |

No match to: 1588.0922, 1966.6215

425 Torsin-3A precursor

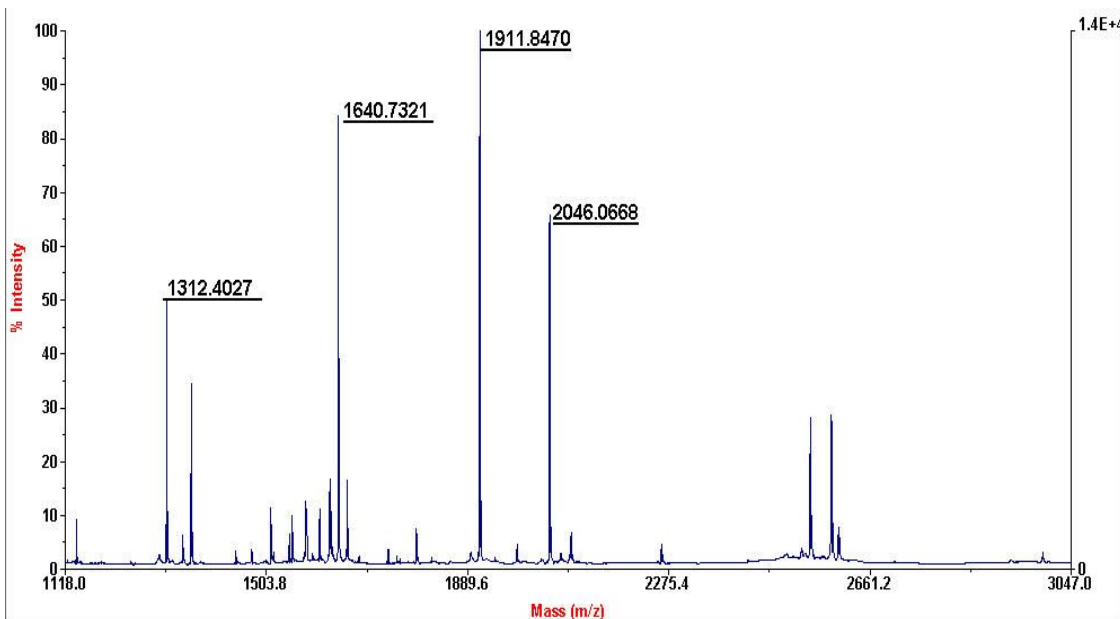

| Start - End   | Observed  | Mr(expt)  | Mr(calc)  | Delta   | Miss Sequence                        |
|---------------|-----------|-----------|-----------|---------|--------------------------------------|
| 174 - 186     | 1640.7321 | 1639.7249 | 1639.8504 | -0.1255 | 1 K.NFVARMLVENLYR.D Oxidation (M)    |
| 179 - 195     | 2046.0668 | 2045.0595 | 2044.9380 | 0.1215  | 1 R.MLVENLYRDGLMSDCVR.M 2            |
| Oxidation (M) |           |           |           |         |                                      |
| 360 - 375     | 1911.8470 | 1910.8397 | 1910.9005 | -0.0608 | 0 K.EETLDEIAQMMVYVPK.E Oxidation (M) |
| 376 - 386     | 1312.4027 | 1311.3954 | 1311.5765 | -0.1811 | 0 K.EEQLFSSQGCK.S                    |

No match to: 2586.3341

426 Rab GDP dissociation inhibitor beta

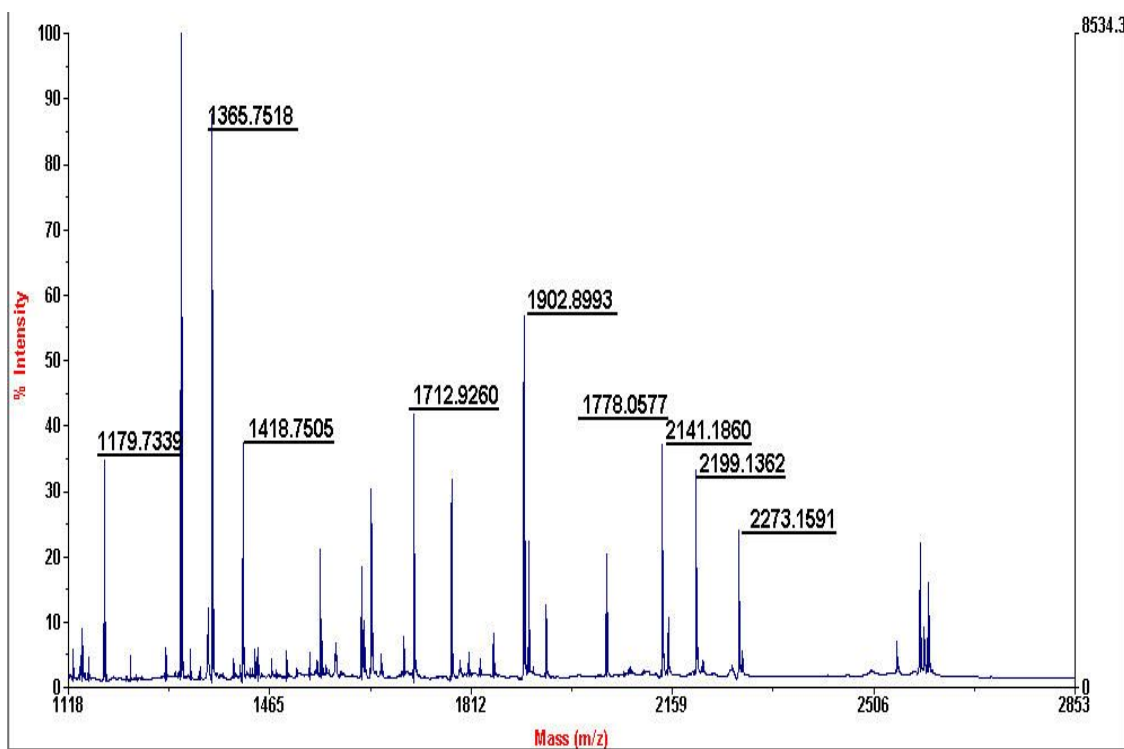

| Start - End | Observed  | Mr(expt)  | Mr(calc)  | Delta  | Miss Sequence                    |
|-------------|-----------|-----------|-----------|--------|----------------------------------|
| 36 - 55     | 2273.1591 | 2272.1518 | 2272.1011 | 0.0507 | 1 R.NPYYGGESASITPLEDLYKR.F       |
| 56 - 68     | 1418.7505 | 1417.7432 | 1417.7024 | 0.0409 | 1 R.FKIPGSPPEMGR.G Oxidation (M) |
| 143 - 156   | 1712.9260 | 1711.9187 | 1711.8570 | 0.0618 | 1 K.FLVYVANFDEKDPR.T             |
| 194 - 208   | 1902.8993 | 1901.8921 | 1901.8102 | 0.0819 | 0 R.TDDYLDQPCYETINR.I            |
| 222 - 240   | 2141.1860 | 2140.1788 | 2140.0993 | 0.0795 | 0 K.SPYLYPLYGLGELPQGFAR.L        |

|           |           |           |           |        |   |                        |
|-----------|-----------|-----------|-----------|--------|---|------------------------|
| 300 - 309 | 1179.7339 | 1178.7266 | 1178.6845 | 0.0421 | 0 | R.VICILSHPIK.N         |
| 310 - 328 | 2199.1362 | 2198.1289 | 2198.0498 | 0.0791 | 0 | K.NTNDANSCQIIPQNQVNR.K |
| 365 - 379 | 1778.0577 | 1777.0505 | 1776.9985 | 0.0520 | 0 | K.EIRPALELLEPIEQK.F    |
| 391 - 402 | 1365.7518 | 1364.7445 | 1364.6936 | 0.0509 | 0 | K.DLGTESQIFISR.T       |

No match to: 1311.7865, 1552.6430, 1639.8896, 1911.0156, 2045.1422, 2585.2097

427 Septin-11

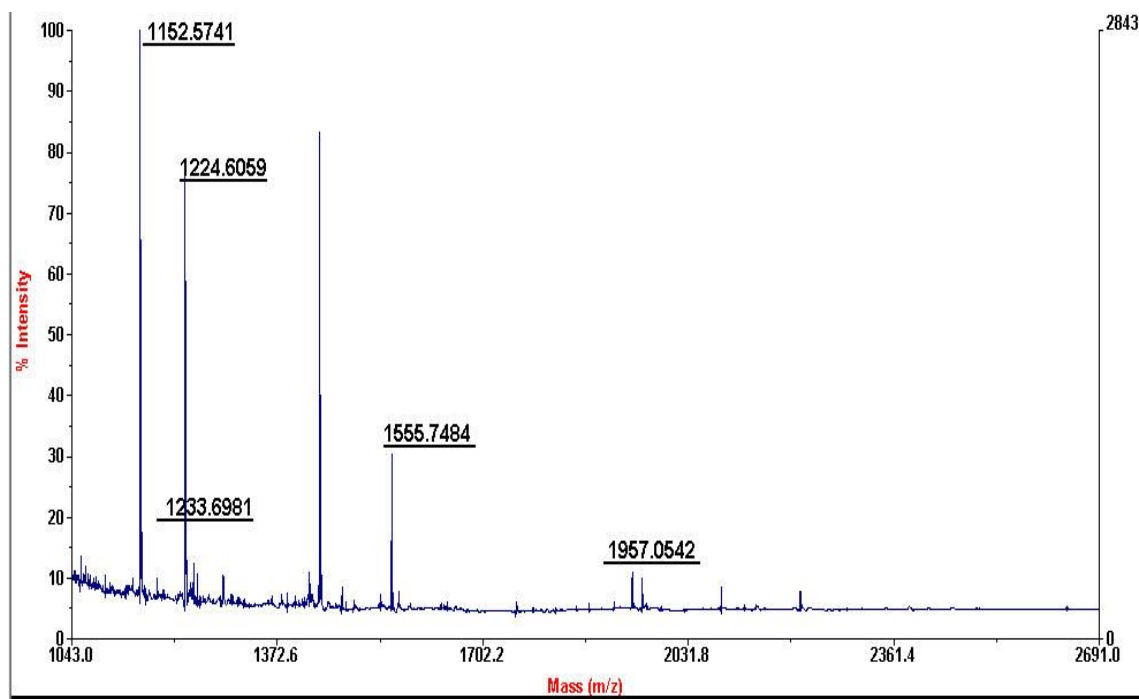

| Start - End | Observed  | Mr(expt)  | Mr(calc)  | Delta  | Miss Sequence               |
|-------------|-----------|-----------|-----------|--------|-----------------------------|
| 66 - 79     | 1555.7484 | 1554.7412 | 1554.7063 | 0.0349 | 0 K.FESDPATHNEPGVRL         |
| 84 - 93     | 1224.6059 | 1223.5987 | 1223.5782 | 0.0205 | 0 R.SYELQESNVR.L            |
| 138 - 146   | 1152.5741 | 1151.5668 | 1151.5360 | 0.0308 | 0 R.SLFNYHDTRI              |
| 273 - 279   | 946.5624  | 945.5551  | 945.5429  | 0.0121 | 1 K.LREMLIR.V Oxidation (M) |
| 293 - 298   | 880.4600  | 879.4527  | 879.4239  | 0.0288 | 0 R.HYELYR.R                |
| 327 - 336   | 1233.6981 | 1232.6909 | 1232.6513 | 0.0396 | 1 K.RNEFLGELQK.K            |
| 400 - 418   | 1957.0542 | 1956.0469 | 1956.0024 | 0.0444 | 0 K.AAAQLLQSQAQSGAQQTK.K    |

No match to: 1361.8020, 1439.8018, 1634.8589, 1940.9965



428 Alpha-centractin

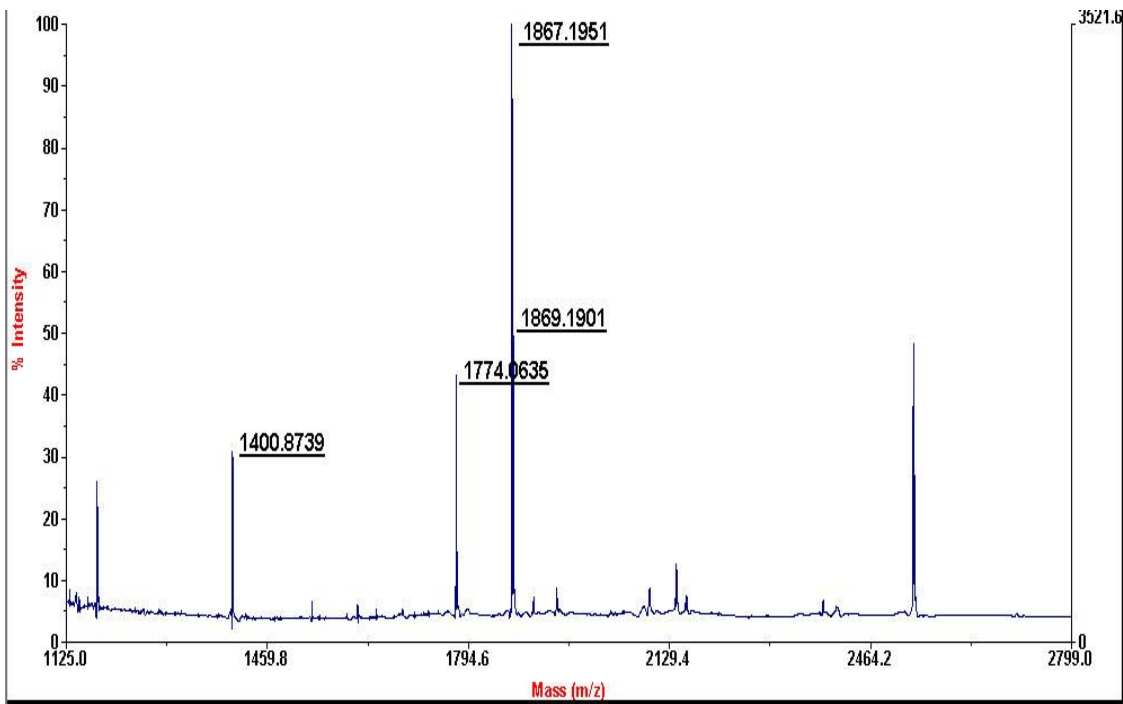

| Start - End | Observed  | Mr(expt)  | Mr(calc)  | Delta  | Miss Sequence           |
|-------------|-----------|-----------|-----------|--------|-------------------------|
| 33 - 43     | 1400.8739 | 1399.8667 | 1399.6707 | 0.1960 | 0 K.YCFPNYVGRPK.H       |
| 201 - 215   | 1774.0635 | 1773.0563 | 1772.7893 | 0.2669 | 0 K.EGYDFHSSEFEIVK.A    |
| 239 - 255   | 1867.1951 | 1866.1878 | 1865.9159 | 0.2719 | 0 K.AQYYLPDGSTIEIGPSR.F |
| 362 - 369   | 1869.1901 | 967.5217  | 967.3883  | 0.1334 | 0 K.EYEEDGAR.S          |

No match to: 2534.7155

429 Nebulin-related-anchoring protein (N-RAP)

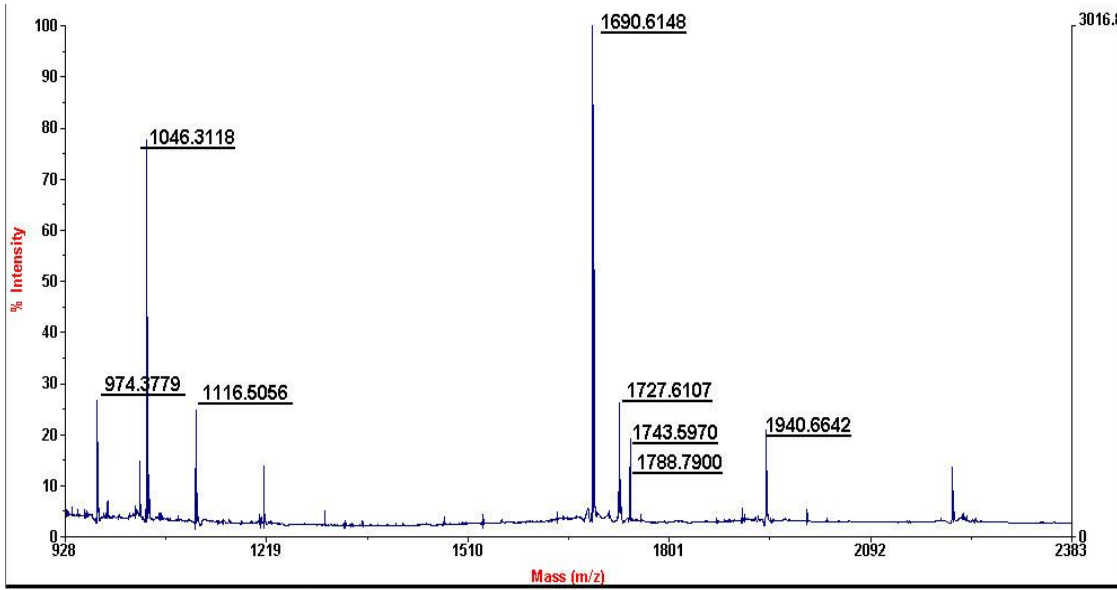

| Start - End | Observed  | Mr(expt)  | Mr(calc)  | Delta   | Miss Sequence                 |
|-------------|-----------|-----------|-----------|---------|-------------------------------|
| 255 - 263   | 974.3779  | 973.3706  | 973.4828  | -0.1123 | 0 R.ANELASDVR.Y               |
| 611 - 619   | 1116.5056 | 1115.4983 | 1115.5168 | -0.0186 | 1 K.MSSEVEYKK.G Oxidation (M) |
| 917 - 931   | 1727.6107 | 1726.6034 | 1726.8274 | -0.2240 | 1 K.AYGLQSDNQYRADVK.W         |
| 975 - 983   | 1046.3118 | 1045.3045 | 1045.4862 | -0.1817 | 0 K.DTPEMVQAR.I               |
| 1298 - 1314 | 1940.6642 | 1939.6569 | 1939.9428 | -0.2859 | 1 R.ASGDIASDFLYRHDFVK.E       |
| 1383 - 1396 | 1690.6148 | 1689.6075 | 1689.8726 | -0.2651 | 1 R.TQYHKFTALPEDLK.M          |
| 1429 - 1436 | 893.3530  | 892.3457  | 892.3960  | -0.0503 | 0 R.SPQMESAK.K Oxidation (M)  |
| 1598 - 1613 | 1743.5970 | 1742.5897 | 1742.8588 | -0.2690 | 0 R.SQFHSSTDQPGLLQAK.R        |

430 T-cell surface glycoprotein CD5 precursor

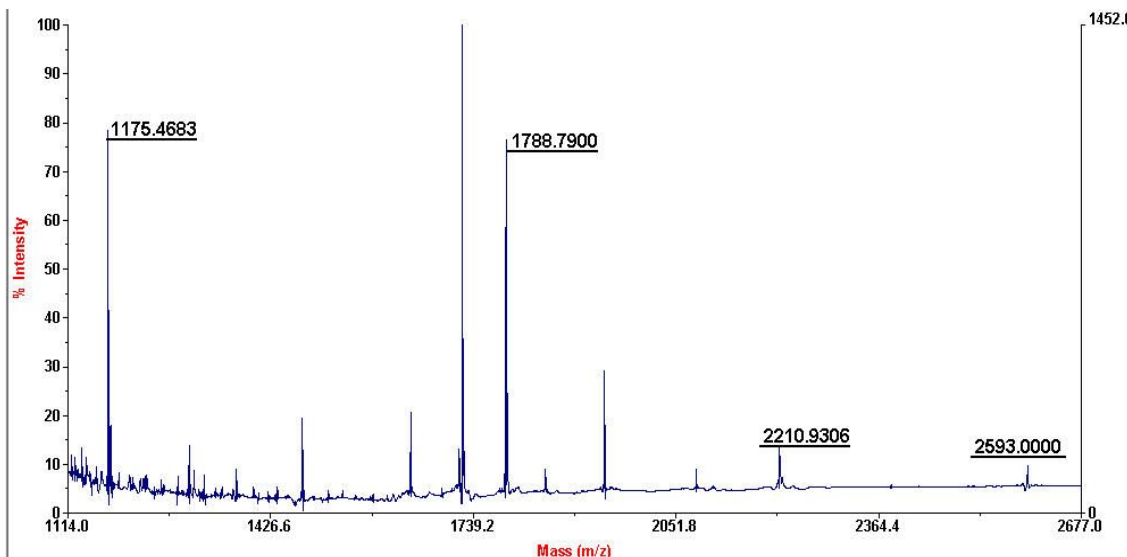

| Start - End | Observed  | Mr(expt)  | Mr(calc)  | Delta   | Miss Sequence                 |
|-------------|-----------|-----------|-----------|---------|-------------------------------|
| 70 - 79     | 1175.4683 | 1174.4610 | 1174.5255 | -0.0645 | 0 K.QWEDPSQASK.V              |
| 122 - 137   | 1788.7900 | 1787.7827 | 1787.8004 | -0.0177 | 0 R.NDMCHSLGLTCLEPQK.T        |
| 339 - 356   | 2210.9306 | 2209.9233 | 2210.0513 | -0.1280 | 1 R.GLFCPHQKLSQCHELWER.N      |
| 439 - 461   | 2593.0000 | 2591.9927 | 2592.1701 | -0.1774 | 1 R.SHAENPTASHVDNEYSQPPRNSR.L |

No match to: 1721.6813

#### 431 Aminoacylase-1

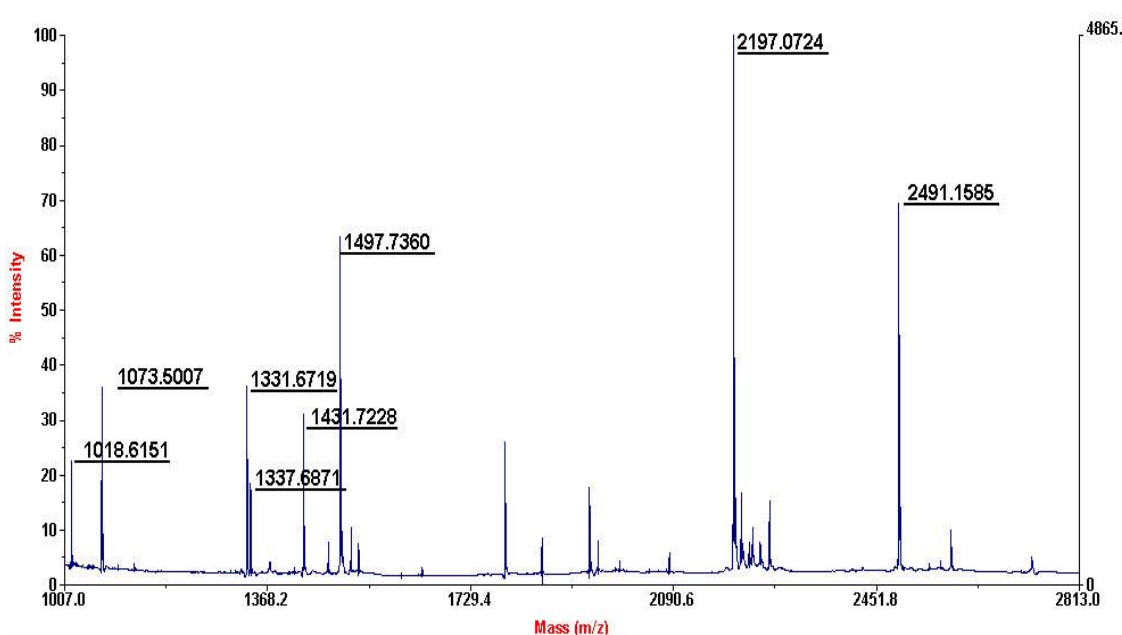

| Start - End | Observed  | Mr(expt)  | Mr(calc)  | Delta   | Miss Sequence                      |
|-------------|-----------|-----------|-----------|---------|------------------------------------|
| 5 - 17      | 1497.7360 | 1496.7287 | 1496.7260 | 0.0027  | 0 K.GPEEEHPSVTLFR.Q                |
| 24 - 43     | 2197.0724 | 2196.0651 | 2196.0851 | -0.0200 | 0 R.TVQPKPDYGAAVAFFEETAR.Q         |
| 101 - 109   | 1073.5007 | 1072.4935 | 1072.4825 | 0.0109  | 0 K.DSEGYYIAR.G                    |
| 116 - 126   | 1337.6871 | 1336.6798 | 1336.6809 | -0.0011 | 0 K.CVSIQYLEAVR.R                  |
| 169 - 191   | 2491.1585 | 2490.1512 | 2490.1703 | -0.0191 | 0 R.AGFALDEGIANPTDAFTVFYSER.S      |
| 192 - 197   | 830.4568  | 829.4495  | 829.4235  | 0.0260  | 0 R.SPWWVR.V                       |
| 222 - 230   | 1018.6151 | 1017.6079 | 1017.5971 | 0.0107  | 0 K.VVNSILAFR.E                    |
| 354 - 367   | 1431.7228 | 1430.7155 | 1430.7340 | -0.0185 | 0 R.AVGVPALGFSPMNR.T Oxidation (M) |
| 368 - 378   | 1331.6719 | 1330.6646 | 1330.6630 | 0.0017  | 0 R.TPVLLHDHDER.L                  |

379 - 386 984.5595 983.5522 983.5552 -0.0030 0 R.LHEAVFLR.G

No match to: 1790.8924, 1940.9300

432 Septin-2 (Protein NEDD5)

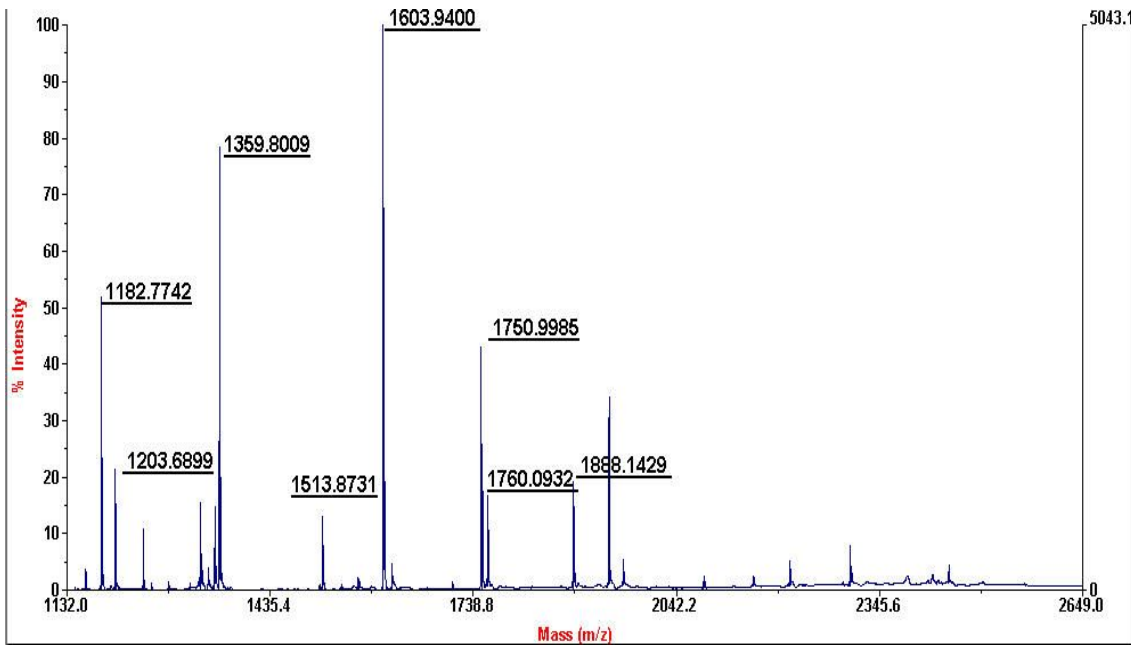

| Start - End | Observed  | Mr(expt)  | Mr(calc)  | Delta  | Miss Sequence           |
|-------------|-----------|-----------|-----------|--------|-------------------------|
| 67 - 77     | 1182.7742 | 1181.7669 | 1181.6768 | 0.0901 | 1 R.VIPGAAEKIER.T       |
| 78 - 91     | 1603.9400 | 1602.9327 | 1602.8101 | 0.1226 | 0 R.TVQIEASTVEIEER.G    |
| 78 - 94     | 1888.1429 | 1887.1356 | 1886.9949 | 0.1407 | 1 R.TVQIEASTVEIEERGVL.L |
| 97 - 112    | 1750.9985 | 1749.9912 | 1749.8356 | 0.1556 | 0 R.LTVVDTPGYGDAINCR.D  |
| 117 - 128   | 1513.8731 | 1512.8658 | 1512.7460 | 0.1198 | 0 K.TIISYIDEQFER.Y      |
| 129 - 138   | 1203.6899 | 1202.6826 | 1202.5680 | 0.1146 | 0 R.YLHDESGLNR.R        |
| 129 - 139   | 1359.8009 | 1358.7936 | 1358.6691 | 0.1245 | 1 R.YLHDESGLNRR.H       |
| 233 - 249   | 1760.0932 | 1759.0860 | 1758.9516 | 0.1344 | 0 K.ASIPFSVVGSNQLIEAK.G |

No match to: 1045.7046, 1331.8498, 1941.0829

433 Isocitrate dehydrogenase [NADP] cytoplasmic

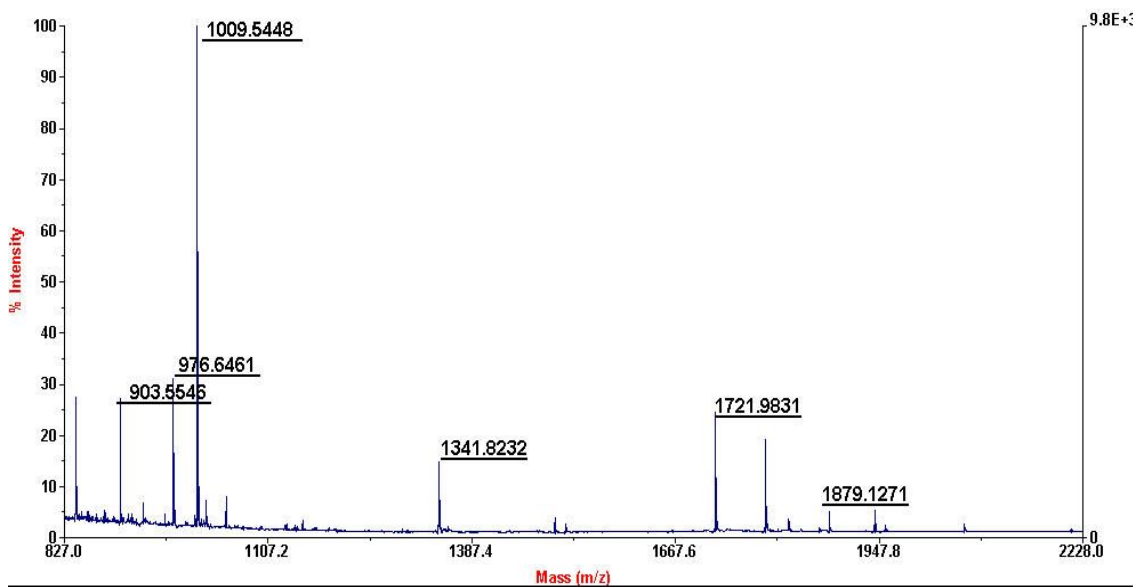

| Start - End | Observed  | Mr(expt)  | Mr(calc)  | Delta  | Miss Sequence           |
|-------------|-----------|-----------|-----------|--------|-------------------------|
| 101 - 109   | 976.6461  | 975.6388  | 975.5502  | 0.0887 | 0 R.NILGGTVFR.E         |
| 133 - 140   | 1009.5448 | 1008.5375 | 1008.4413 | 0.0962 | 0 R.HAYGDQYR.A          |
| 237 - 249   | 1721.9831 | 1720.9758 | 1720.8321 | 0.1437 | 1 K.SQFEAQKIWYEHR.L     |
| 244 - 249   | 903.5546  | 902.5473  | 902.4399  | 0.1075 | 0 K.IWYEHR.L            |
| 302 - 314   | 1341.8232 | 1340.8159 | 1340.6684 | 0.1475 | 0 K.TVEAEAAHGTVTR.H     |
| 322 - 338   | 1879.1271 | 1878.1198 | 1877.9272 | 0.1926 | 0 K.GQETSTNPIASIFAWTR.G |

No match to: 1791.0236, 1941.0713

434 Elongation factor Tu, mitochondrial precursor (EF-Tu)

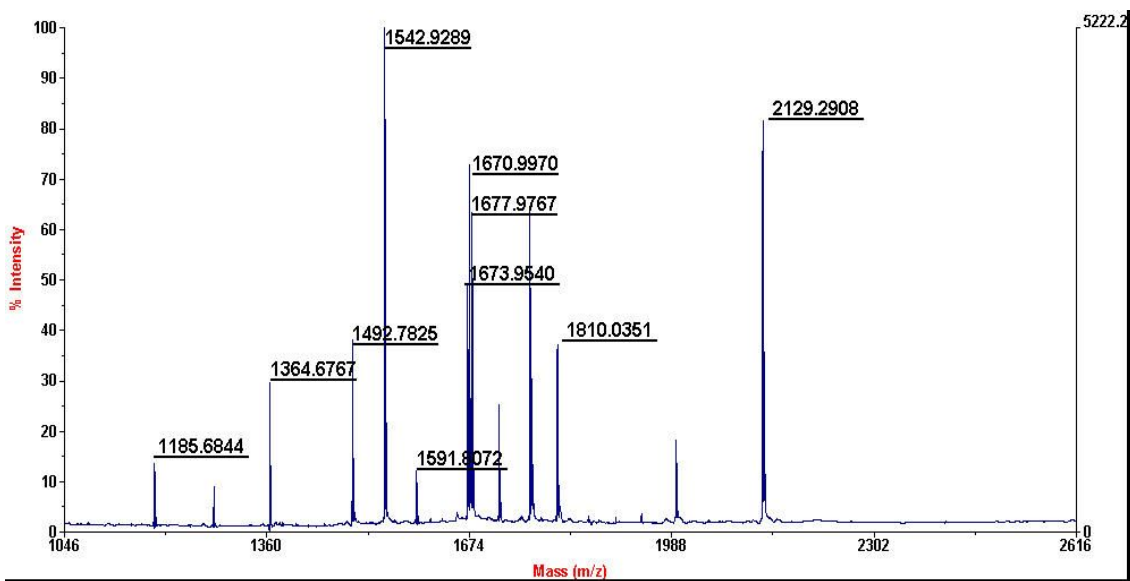

| Start - End | Observed | Mr(expt) | Mr(calc) | Delta | Miss Sequence |
|-------------|----------|----------|----------|-------|---------------|
|-------------|----------|----------|----------|-------|---------------|

|           |           |           |           |        |   |                         |
|-----------|-----------|-----------|-----------|--------|---|-------------------------|
| 54 - 70   | 1810.0351 | 1809.0278 | 1808.9282 | 0.0996 | 0 | R.DKPHVNVGTIGHVDHGK.T   |
| 91 - 102  | 1492.7825 | 1491.7752 | 1491.6841 | 0.0911 | 1 | K.KYEEIDNAPEER.A        |
| 92 - 102  | 1364.6767 | 1363.6694 | 1363.5891 | 0.0803 | 0 | K.YEEIDNAPEER.A         |
| 92 - 104  | 1591.8072 | 1590.7999 | 1590.7274 | 0.0726 | 1 | K.YEEIDNAPEERAR.G       |
| 105 - 120 | 1673.9540 | 1672.9467 | 1672.8533 | 0.0935 | 0 | R.GITINAAHVEYSTAAR.H    |
| 163 - 169 | 851.5704  | 850.5631  | 850.5025  | 0.0607 | 0 | R.EHLLAR.Q              |
| 239 - 252 | 1542.9289 | 1541.9216 | 1541.8453 | 0.0762 | 0 | K.LLDAVDTYIPVPAR.D      |
| 253 - 271 | 2129.2908 | 2128.2835 | 2128.1568 | 0.1267 | 0 | R.DLEKPFLLPVEAVYSVPGR.G |
| 312 - 327 | 1670.9970 | 1669.9898 | 1669.8747 | 0.1151 | 1 | K.SLERAEAGDNLGALVR.G    |
| 316 - 327 | 1185.6844 | 1184.6771 | 1184.6149 | 0.0622 | 0 | R.AEAGDNLGALVR.G        |
| 352 - 366 | 1677.9767 | 1676.9694 | 1676.8733 | 0.0961 | 1 | K.VEAQVYILSKEEGGR.H     |
| 422 - 429 | 978.5886  | 977.5813  | 977.5043  | 0.0770 | 1 | R.FTLRDGNR.T            |

No match to: 1719.9393, 1767.9653

435 Isocitrate dehydrogenase [NADP] cytoplasmic (EC 1.1.1.42)

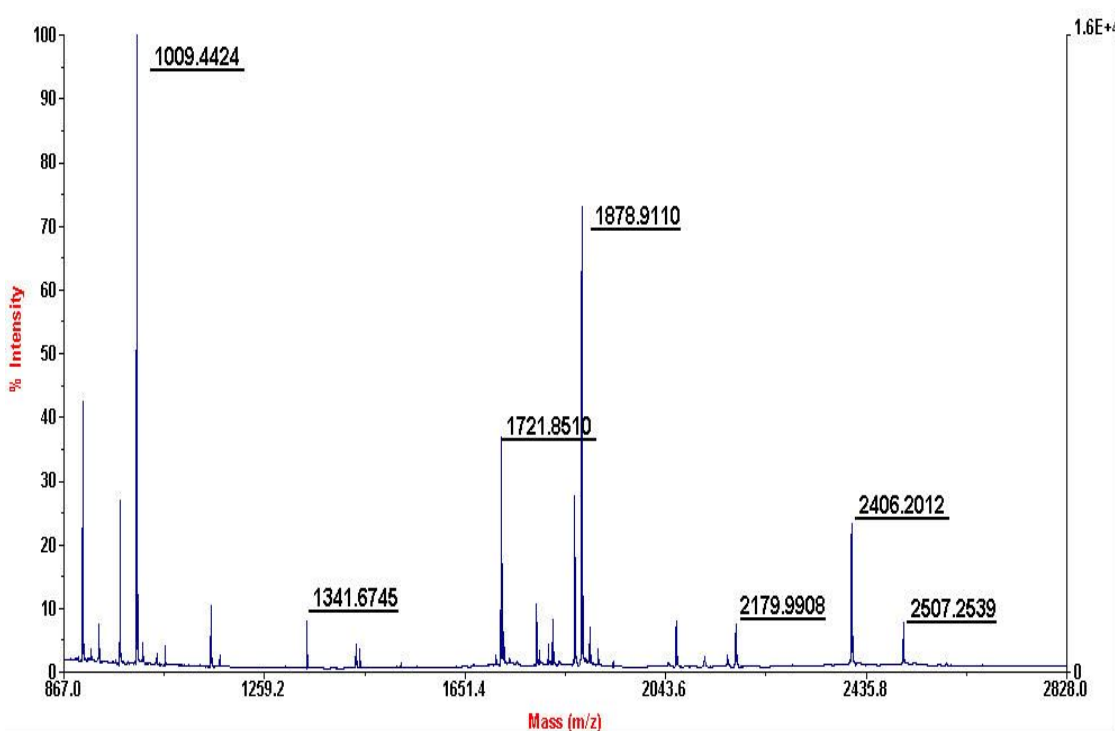

| Start - End | Observed  | Mr(expt)  | Mr(calc)  | Delta   | Miss Sequence              |
|-------------|-----------|-----------|-----------|---------|----------------------------|
| 30 - 49     | 2406.2012 | 2405.1939 | 2405.2267 | -0.0328 | 0 K.LIFPYVELDLHSYDLGIENR.D |

|           |           |           |           |         |   |                           |
|-----------|-----------|-----------|-----------|---------|---|---------------------------|
| 101 - 109 | 976.5585  | 975.5512  | 975.5502  | 0.0010  | 0 | R.NILGGTVFR.E             |
| 133 - 140 | 1009.4424 | 1008.4351 | 1008.4413 | -0.0062 | 0 | R.HAYGDQYR.A              |
| 141 - 164 | 2507.2539 | 2506.2466 | 2506.2592 | -0.0126 | 1 | R.ATDFVVPKVEITYTPSDGTQK.V |
| 237 - 249 | 1721.8510 | 1720.8437 | 1720.8321 | 0.0116  | 1 | K.SQFEAQKIWEHR.L          |
| 244 - 249 | 903.4531  | 902.4458  | 902.4399  | 0.0060  | 0 | K.IWEHR.L                 |
| 302 - 314 | 1341.6745 | 1340.6672 | 1340.6684 | -0.0013 | 0 | K.TVEAEAAHGTVTR.H         |
| 322 - 338 | 1878.9110 | 1877.9038 | 1877.9272 | -0.0234 | 0 | K.GQETSTNPIASIFAWTR.G     |
| 389 - 406 | 2179.9908 | 2178.9836 | 2179.0143 | -0.0308 | 1 | R.SDYLNTEFMDKLGK.I        |

Oxidation (M)

No match to: 1790.8926, 1864.9403, 2064.0618

436 Phosphoglycerate kinase 1

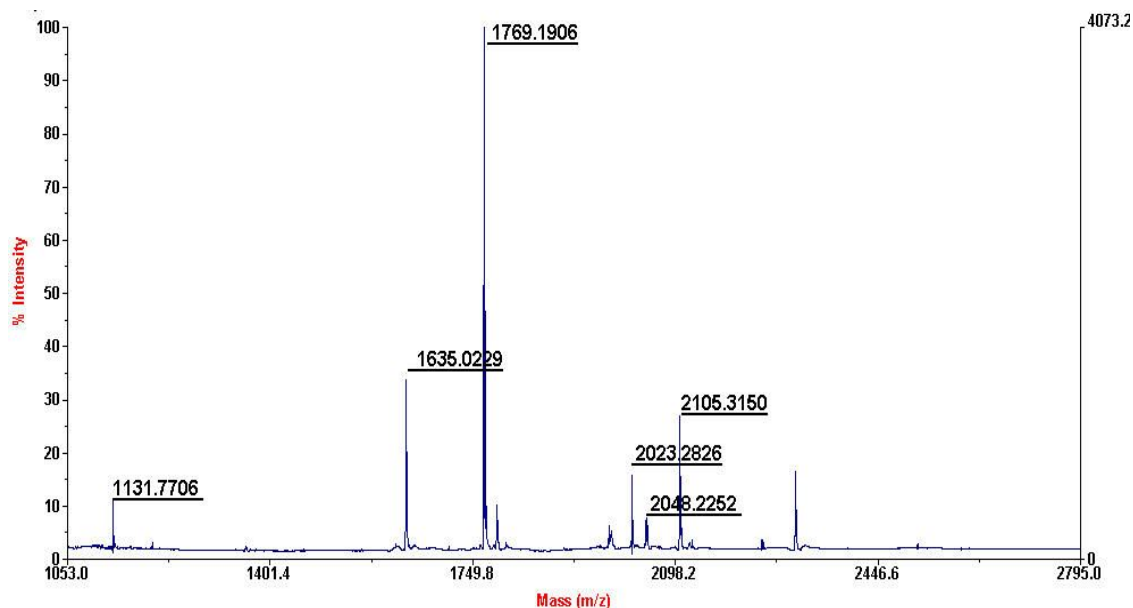

| Start - End | Observed  | Mr(expt)  | Mr(calc)  | Delta  | Miss Sequence           |
|-------------|-----------|-----------|-----------|--------|-------------------------|
| 23 - 39     | 2048.2252 | 2047.2180 | 2046.9905 | 0.2274 | 1 R.VDFNVPMKNNQITNNQR.I |

Oxidation (M)

|           |           |           |           |        |                          |
|-----------|-----------|-----------|-----------|--------|--------------------------|
| 142 - 151 | 1131.7706 | 1130.7633 | 1130.6084 | 0.1549 | 1 K.AEPAKIEAFR.A         |
| 157 - 171 | 1635.0229 | 1634.0156 | 1633.7849 | 0.2307 | 0 K.LGDVYVNDAFGTAHR.A    |
| 200 - 216 | 1769.1906 | 1768.1833 | 1767.9883 | 0.1950 | 0 K.ALESPERPFLAILGGAK.V  |
| 280 - 297 | 2023.2826 | 2022.2754 | 2022.0310 | 0.2444 | 1 K.ITLPVDFVTADKFDENAK.T |

333 - 350 2105.3150 2104.3077 2104.0531 0.2547 0 K.QIVWNGPVGVFWEAFAR.G

No match to: 882.6376, 1791.0985, 2246.4691, 2304.5063, 3281.2667, 3351.5392

437 Zinc finger protein 559

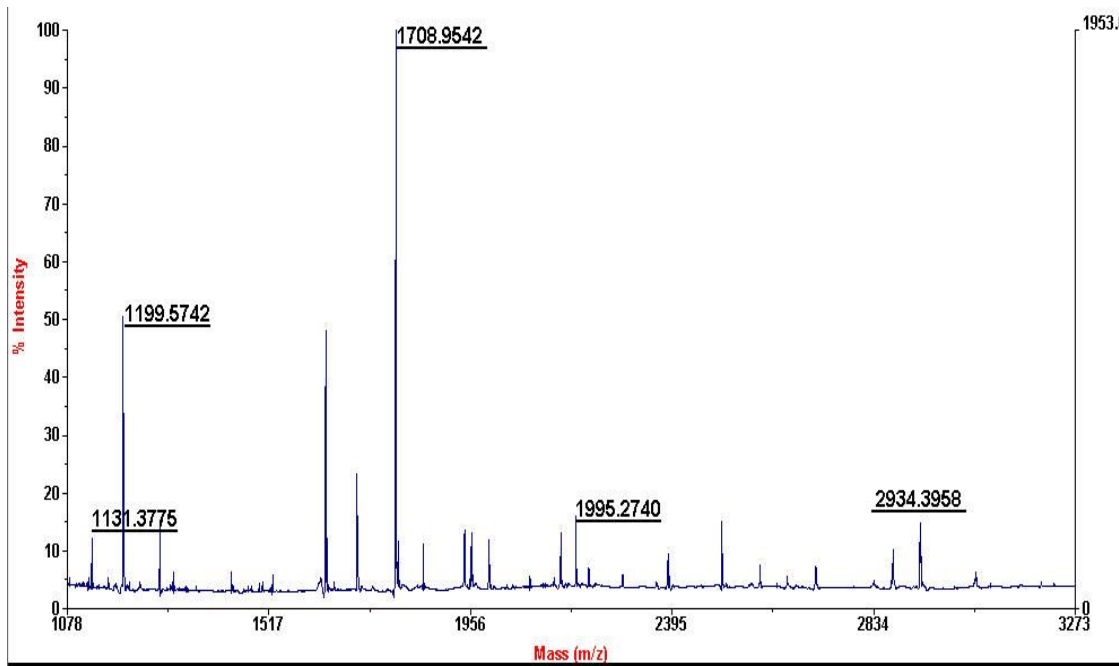

| Start - End | Observed  | Mr(expt)  | Mr(calc)  | Delta   | Miss Sequence           |
|-------------|-----------|-----------|-----------|---------|-------------------------|
| 167 - 176   | 1199.5742 | 1198.5669 | 1198.6128 | -0.0459 | 0 K.TSQNLHLVCK.K        |
| 178 - 186   | 1131.3775 | 1130.3702 | 1130.5720 | -0.2018 | 0 K.THTQEKPYK.C         |
| 245 - 261   | 1995.2740 | 1994.2667 | 1993.9680 | 0.2987  | 0 K.ACGKPFTESSYLTQHLR.T |
| 374 - 388   | 1708.9542 | 1707.9469 | 1707.7709 | 0.1760  | 1 R.THTGEKPYQCKECKG.A   |
| 514 - 538   | 2934.3958 | 2933.3885 | 2933.2630 | 0.1255  | 1                       |

R.SHSVEKPYKECGQTFSNSSCLTECV.- 3

No match to: 2185.5149

438 Leucine-zipper-like transcriptional regulator 1



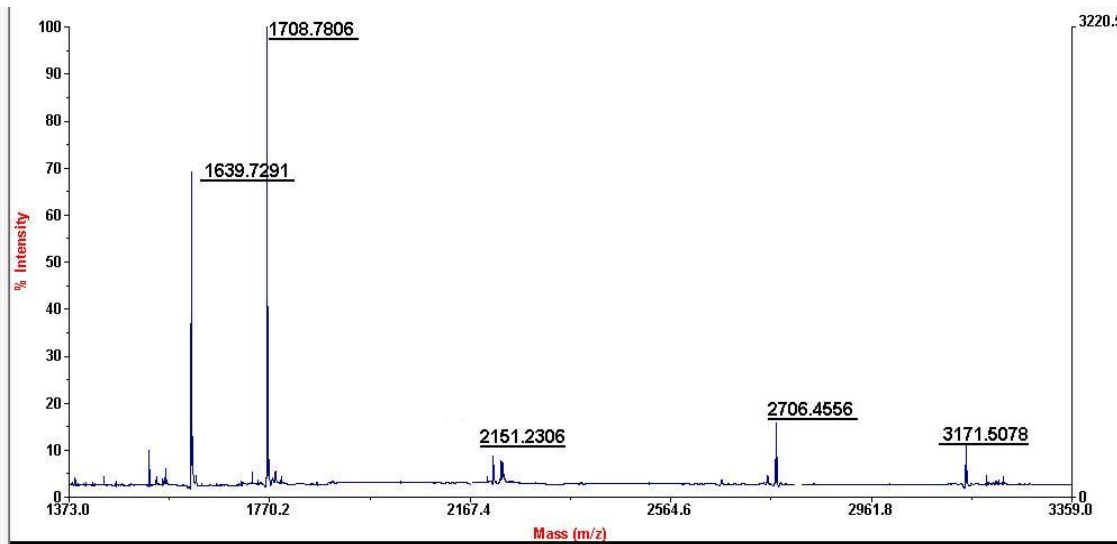

| Start - End | Observed  | Mr(expt)  | Mr(calc)  | Delta   | Miss Sequence                                       |
|-------------|-----------|-----------|-----------|---------|-----------------------------------------------------|
| 2 - 21      | 1639.7291 | 1638.7218 | 1638.8438 | -0.1220 | 0 M.AGPGSTGGQIGAAALAGGAR.S                          |
| 157 - 170   | 1708.7806 | 1707.7733 | 1707.8369 | -0.0636 | 1 K.FATGQWTEWKIEGR.L                                |
| 363 - 388   | 2706.4556 | 2705.4484 | 2705.3297 | 0.1187  | 1<br>R.DVFGLDFGTTSKQPTQPASELPSGR.L                  |
| 419 - 435   | 2151.2306 | 2150.2233 | 2149.9350 | 0.2883  | 1 R.FQFSCYPKCTLHEDYGR.L                             |
| 698 - 725   | 3171.5078 | 3170.5006 | 3170.4835 | 0.0171  | 1<br>R.SFMPEDGQVNISIGEMVPSRQAFESMLR.Y Oxidation (M) |

No match to: 2175.2498

439 NG,NG-dimethylarginine dimethylaminohydrolase 1

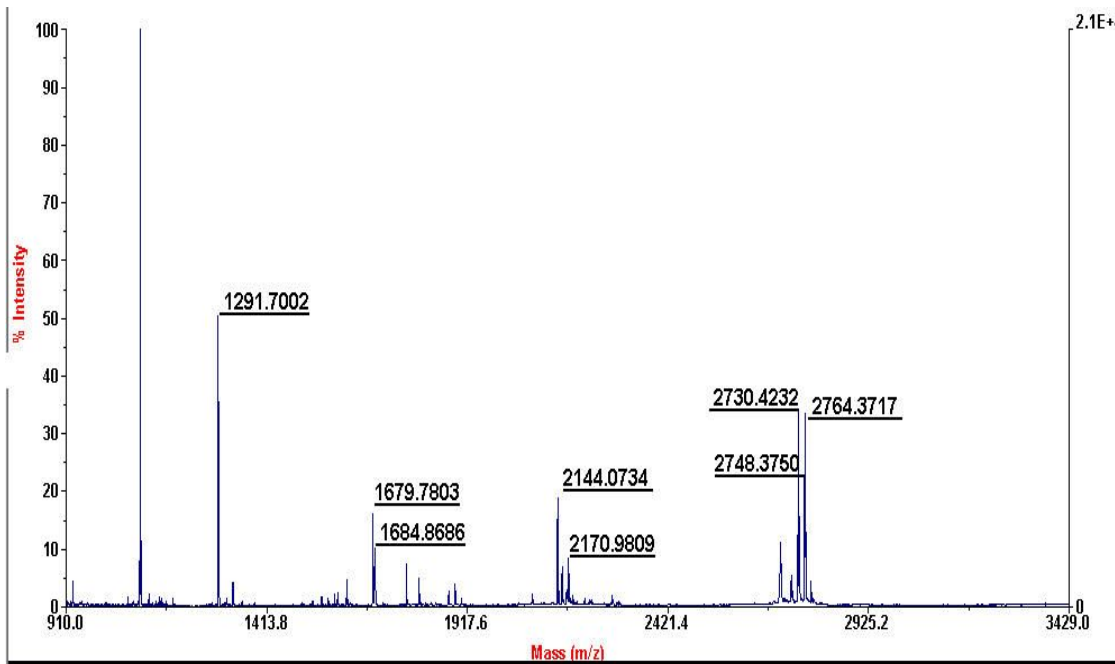

| Start - End                                 | Observed  | Mr(expt)  | Mr(calc)  | Delta   | Miss Sequence               |
|---------------------------------------------|-----------|-----------|-----------|---------|-----------------------------|
| 20 - 31                                     | 1291.7002 | 1290.6929 | 1290.7044 | -0.0115 | 0 R.ALPELGGQHALR.S          |
| 112 - 136                                   | 2748.3750 | 2747.3677 | 2747.3800 | -0.0123 | 1                           |
| K.LQLNIVEMKDENATLDGGDVLFTGR.E               |           |           |           |         |                             |
| 112 - 136                                   | 2764.3717 | 2763.3644 | 2763.3749 | -0.0105 | 1                           |
| K.LQLNIVEMKDENATLDGGDVLFTGR.E Oxidation (M) |           |           |           |         |                             |
| 121 - 136                                   | 1679.7803 | 1678.7730 | 1678.7799 | -0.0069 | 0 K.DENATLDGGDVLFTGR.E      |
| 150 - 175                                   | 2730.4232 | 2729.4159 | 2729.4276 | -0.0117 | 1                           |
| R.GAEILADTFKDYAVSTVPVADGLHLK.S              |           |           |           |         |                             |
| 160 - 175                                   | 1684.8686 | 1683.8613 | 1683.8832 | -0.0219 | 0 K.DYAVSTVPVADGLHLK.S      |
| 176 - 196                                   | 2170.9809 | 2169.9736 | 2170.0034 | -0.0298 | 0 K.SFCMAGPNLIAIGSSSAQK.A ; |
| Oxidation (M)                               |           |           |           |         |                             |
| 212 - 230                                   | 2144.0734 | 2143.0661 | 2143.0983 | -0.0322 | 0 K.LTVPDDIAANCIYLNIPNK.G   |

No match to: 1095.5587, 1763.8011, 2703.3304

440 Delta(3,5)-Delta(2,4)-dienoyl-CoA isomerase

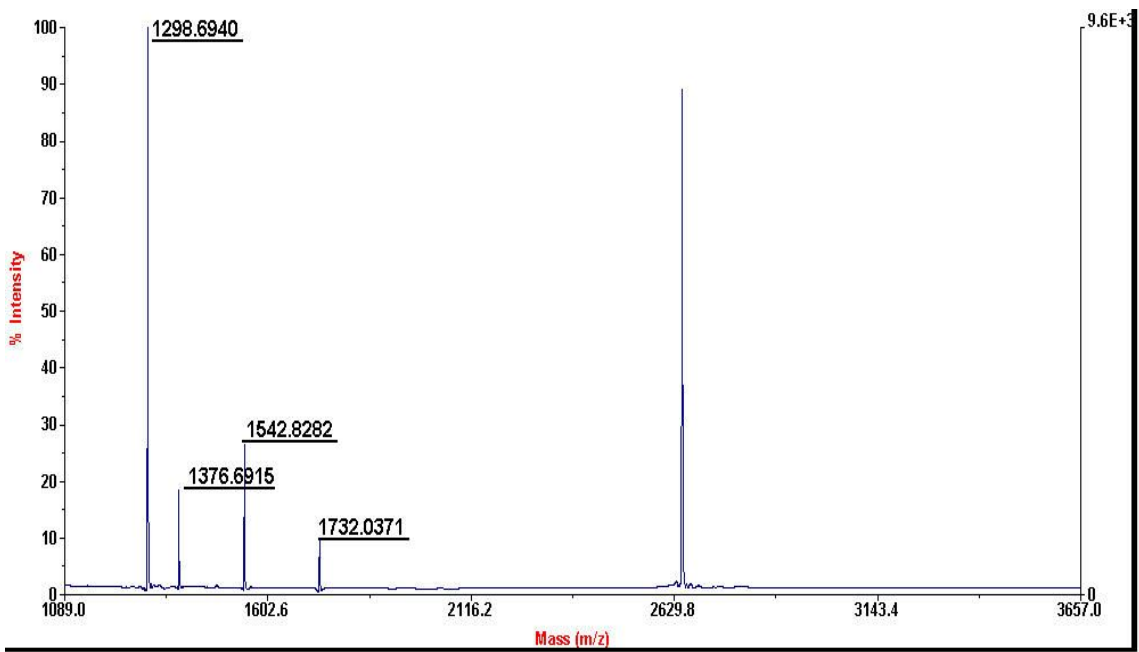

| Start - End | Observed  | Mr(expt)  | Mr(calc)  | Delta  | Miss Sequence          |
|-------------|-----------|-----------|-----------|--------|------------------------|
| 149 - 158   | 1298.6940 | 1297.6867 | 1297.6302 | 0.0565 | 0 R.YQETFNVIER.C       |
| 186 - 196   | 1376.6915 | 1375.6843 | 1375.6231 | 0.0612 | 0 R.YCAQDAFFQVK.E      |
| 197 - 211   | 1542.8282 | 1541.8209 | 1541.8049 | 0.0160 | 0 K.EVDVGLAADVGTLR.L   |
| 215 - 230   | 1732.0371 | 1731.0298 | 1730.9315 | 0.0983 | 0 K.VIGNQSLVNELAFTAR.K |

No match to: 2648.3011

441 Heat shock 70 kDa protein 1 (HSP70.1)

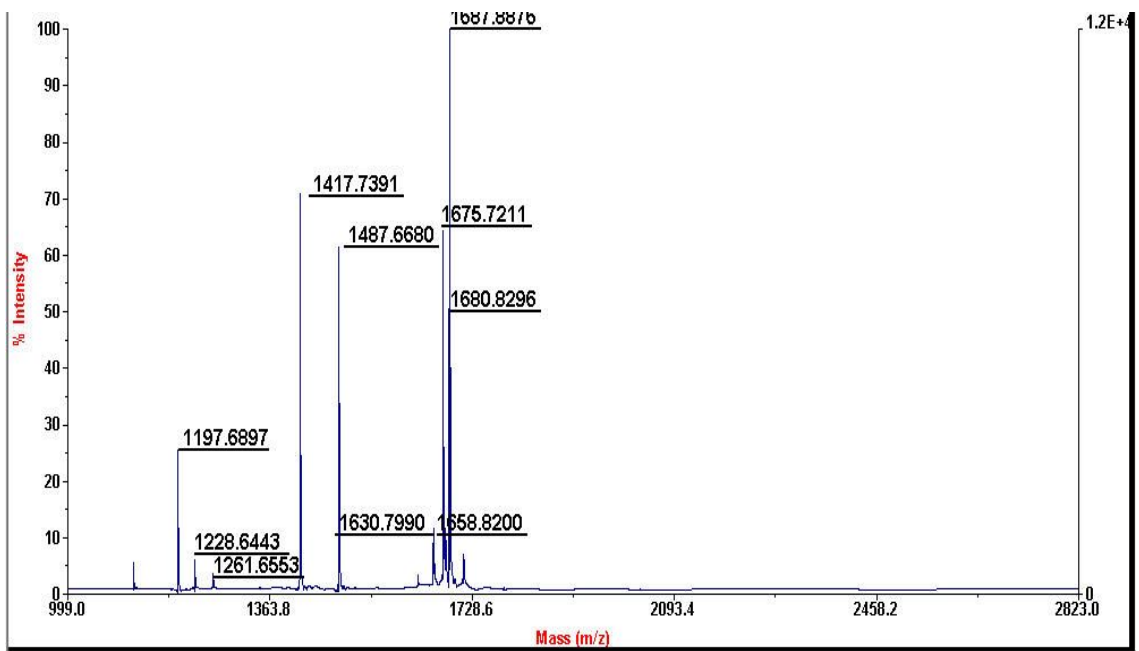

| Start - End | Observed | Mr(expt) | Mr(calc) | Delta | Miss Sequence |
|-------------|----------|----------|----------|-------|---------------|
|-------------|----------|----------|----------|-------|---------------|

|           |           |           |           |         |   |                                  |
|-----------|-----------|-----------|-----------|---------|---|----------------------------------|
| 26 - 36   | 1228.6443 | 1227.6370 | 1227.6207 | 0.0162  | 0 | K.VEIIANDQGNR.T                  |
| 37 - 49   | 1487.6680 | 1486.6607 | 1486.6940 | -0.0333 | 0 | R.TTPSYVAFTDTER.L                |
| 57 - 71   | 1658.8200 | 1657.8127 | 1657.8424 | -0.0297 | 0 | K.NQVALNPQNTVFDK.R               |
| 89 - 102  | 1680.8296 | 1679.8223 | 1679.8420 | -0.0197 | 0 | K.HWPFQVINDGDKPK.V               |
| 113 - 126 | 1630.7990 | 1629.7917 | 1629.7960 | -0.0043 | 0 | K.AFYPEEISSMVLTK.M Oxidation (M) |
| 160 - 171 | 1197.6897 | 1196.6824 | 1196.6877 | -0.0053 | 0 | K.DAGVIAGLNVLR.I                 |
| 172 - 187 | 1687.8876 | 1686.8803 | 1686.8940 | -0.0137 | 0 | R.IINEPTAAAIAYGLDR.T             |
| 221 - 236 | 1675.7211 | 1674.7138 | 1674.7234 | -0.0096 | 0 | K.ATAGDTHLGGEDFDNR.L             |
| 237 - 246 | 1261.6553 | 1260.6480 | 1260.6503 | -0.0023 | 0 | R.LVNHFVVEEFK.R                  |
| 237 - 247 | 1417.7391 | 1416.7318 | 1416.7514 | -0.0196 | 1 | R.LVNHFVVEEFK.R                  |

442 Heat shock cognate 71 kDa protein (Heat shock 70 kDa protein 8)

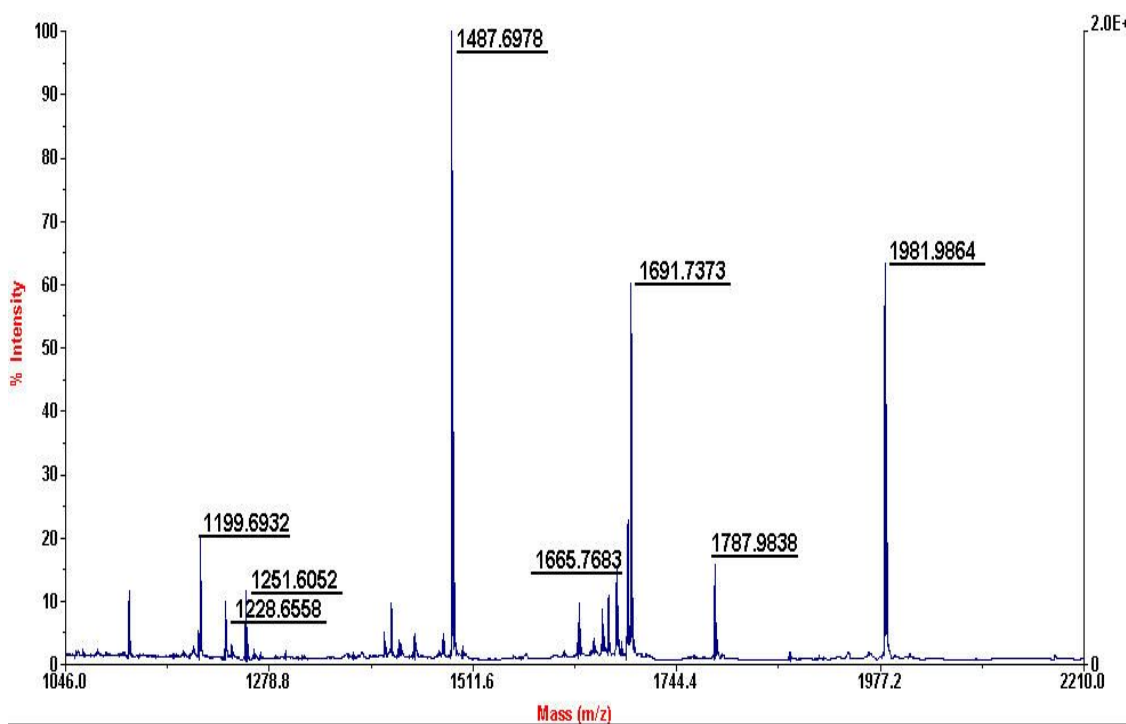

| Start - End | Observed  | Mr(expt)  | Mr(calc)  | Delta   | Miss Sequence                      |
|-------------|-----------|-----------|-----------|---------|------------------------------------|
| 26 - 36     | 1228.6558 | 1227.6485 | 1227.6207 | 0.0277  | 0 K.VEIIANDQGNR.T                  |
| 37 - 49     | 1487.6978 | 1486.6905 | 1486.6940 | -0.0035 | 0 R.TTPSYVAFTDTER.L                |
| 57 - 71     | 1665.7683 | 1664.7610 | 1664.7828 | -0.0218 | 0 K.NQVAMNPTNTVFDK.R Oxidation (M) |
| 138 - 155   | 1981.9864 | 1980.9791 | 1980.9905 | -0.0114 | 0 K.TVTNAVVTVPAYFNDSQR.Q           |

|           |           |           |           |         |   |                              |
|-----------|-----------|-----------|-----------|---------|---|------------------------------|
| 160 - 171 | 1199.6932 | 1198.6859 | 1198.6670 | 0.0190  | 0 | K.DAGTIAGLNVLR.I             |
| 172 - 188 | 1787.9838 | 1786.9765 | 1786.9828 | -0.0064 | 1 | R.IINEPTAAAIA YGLDKK.V       |
| 221 - 236 | 1691.7373 | 1690.7300 | 1690.7183 | 0.0117  | 0 | K.STAGDTHLGGEDFDNR.M         |
| 237 - 246 | 1251.6052 | 1250.5979 | 1250.6118 | -0.0138 | 0 | R.MVNHFIAEFK.R Oxidation (M) |

No match to: 1118.5318, 1417.8086, 1675.7505, 1687.9149

443 78 kDa glucose-regulated protein precursor (GRP 78)

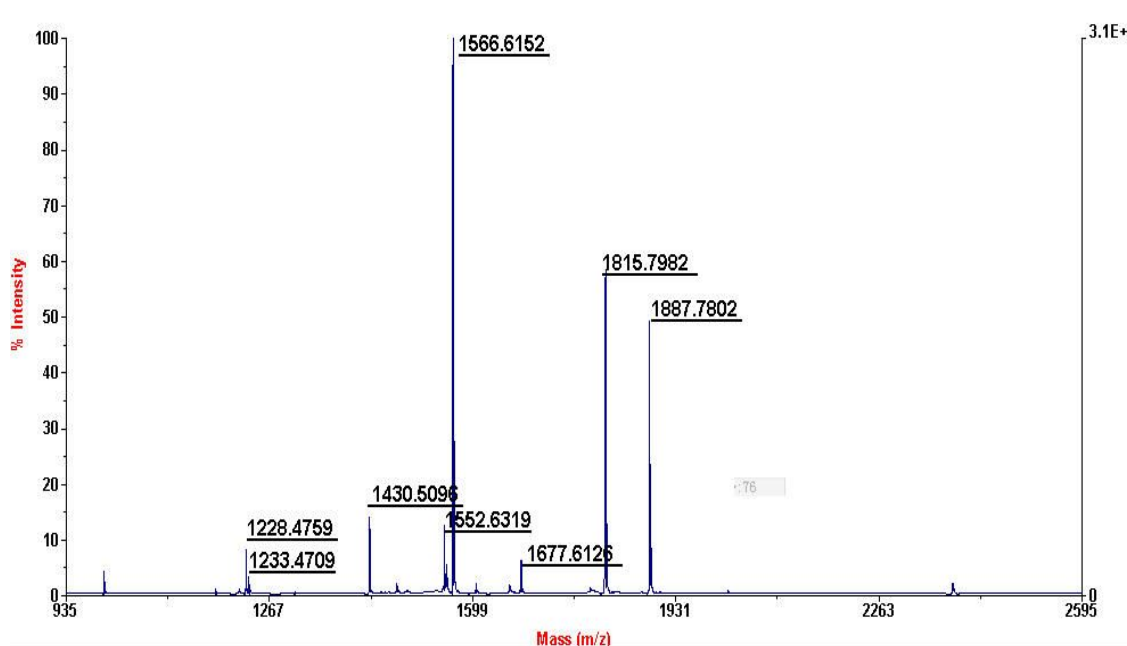

| Start - End | Observed  | Mr(expt)  | Mr(calc)  | Delta   | Miss Sequence                      |
|-------------|-----------|-----------|-----------|---------|------------------------------------|
| 50 - 60     | 1228.4759 | 1227.4687 | 1227.6207 | -0.1521 | 0 R.VEIIANDQGNR.I                  |
| 61 - 74     | 1566.6152 | 1565.6080 | 1565.7726 | -0.1646 | 0 R.ITPSYVAFTPEGER.L               |
| 82 - 96     | 1677.6126 | 1676.6054 | 1676.8006 | -0.1952 | 0 K.NQLTSNPENTVFDAR.R              |
| 102 - 113   | 1430.5096 | 1429.5023 | 1429.6838 | -0.1815 | 0 R.TWNDPSVQQDIK.F                 |
| 139 - 152   | 1552.6319 | 1551.6246 | 1551.7854 | -0.1608 | 0 K.TFAPEEISAMVLTK.M Oxidation (M) |
| 165 - 181   | 1887.7802 | 1886.7729 | 1886.9639 | -0.1910 | 0 K.VTHAVVTVPAYFNDAQR.Q            |
| 186 - 197   | 1233.4709 | 1232.4636 | 1232.6183 | -0.1547 | 0 K.DAGTIAGLNVMR.I Oxidation (M)   |
| 198 - 214   | 1815.7982 | 1814.7909 | 1814.9890 | -0.1981 | 1 R.IINEPTAAAIA YGLDKR.E           |
| 298 - 306   | 997.4124  | 996.4051  | 996.5101  | -0.1050 | 0 R.ALSSQHQR.I                     |

No match to: 1814.7187, 2383.7650

444 Glyceraldehyde-3-phosphate dehydrogenase

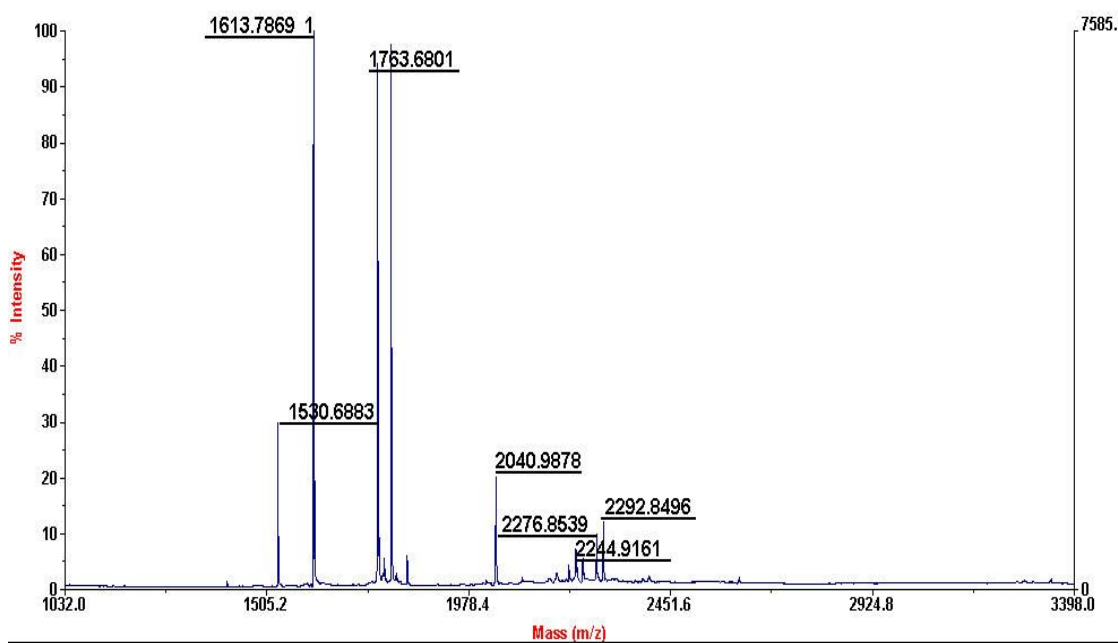

| Start - End   | Observed  | Mr(expt)  | Mr(calc)  | Delta   | Miss Sequence                 |
|---------------|-----------|-----------|-----------|---------|-------------------------------|
| 67 - 80       | 1613.7869 | 1612.7797 | 1612.8937 | -0.1140 | 0 K.LVINGNPITIFQER.D          |
| 67 - 84       | 2040.9878 | 2039.9805 | 2040.1004 | -0.1198 | 1 K.LVINGNPITIFQERDPSK.I      |
| 87 - 107      | 2276.8539 | 2275.8466 | 2276.0307 | -0.1841 | 0 K.WGDAGAEYVVESTGVFTTMEK.A   |
| 87 - 107      | 2292.8496 | 2291.8423 | 2292.0257 | -0.1833 | 0 K.WGDAGAEYVVESTGVFTTMEK.A   |
| Oxidation (M) |           |           |           |         |                               |
| 119 - 139     | 2244.9161 | 2243.9088 | 2244.0919 | -0.1830 | 0 R.VIISAPSADAPMFVMGVNHEK.Y 2 |
| Oxidation (M) |           |           |           |         |                               |
| 235 - 248     | 1530.6883 | 1529.6811 | 1529.7872 | -0.1061 | 0 R.VPTANVSVVDLTCR.L          |
| 310 - 323     | 1763.6801 | 1762.6728 | 1762.7951 | -0.1223 | 0 K.LISWYDNEFGYSNR.V          |

No match to: 1614.7771, 1747.8372, 1795.6830

445 Voltage-dependent anion-selective channel protein 2 (VDAC-2)

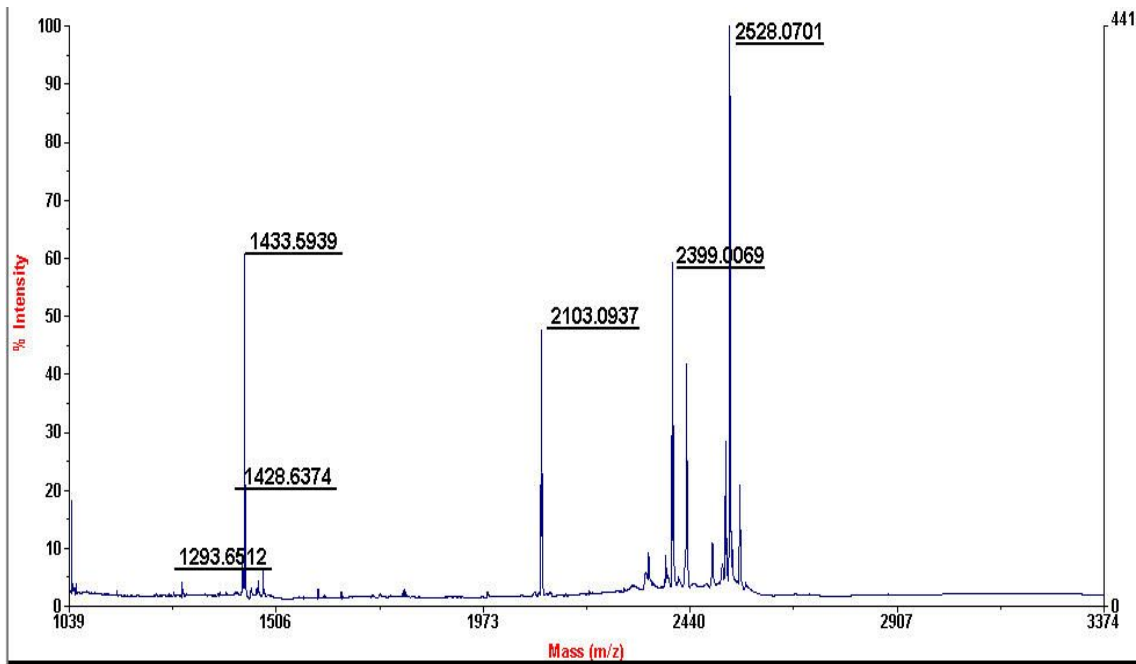

| Start - End | Observed  | Mr(expt)  | Mr(calc)  | Delta   | Miss Sequence                 |
|-------------|-----------|-----------|-----------|---------|-------------------------------|
| 90 - 100    | 1433.5939 | 1432.5866 | 1432.6333 | -0.0467 | 0 K.WCEYGLTFTEK.W             |
| 123 - 135   | 1428.6374 | 1427.6302 | 1427.6933 | -0.0631 | 0 K.LTFDITTFSPNTGK.K          |
| 193 - 200   | 940.4512  | 939.4439  | 939.4563  | -0.0124 | 0 R.NNFAVGYR.T                |
| 201 - 223   | 2528.0701 | 2527.0629 | 2527.1616 | -0.0987 | 0 R.TGDFQLHTNVNDGTEFGGSYQK.V  |
| 224 - 244   | 2399.0069 | 2397.9996 | 2398.0529 | -0.0533 | 0 K.VCEDLDTSVNLAWTSGTNCTR.F 2 |
| 251 - 262   | 1293.6512 | 1292.6439 | 1292.6612 | -0.0173 | 0 K.YQLDPTASISAK.V            |
| 263 - 282   | 2103.0937 | 2102.0864 | 2102.1484 | -0.0620 | 0 K.VNNSLIGVGYTQTLRPGVK.L     |

No match to: 1043.4333, 1449.6286, 1464.6207, 2429.0471

446 Guanine nucleotide-binding protein subunit beta 2-like 1

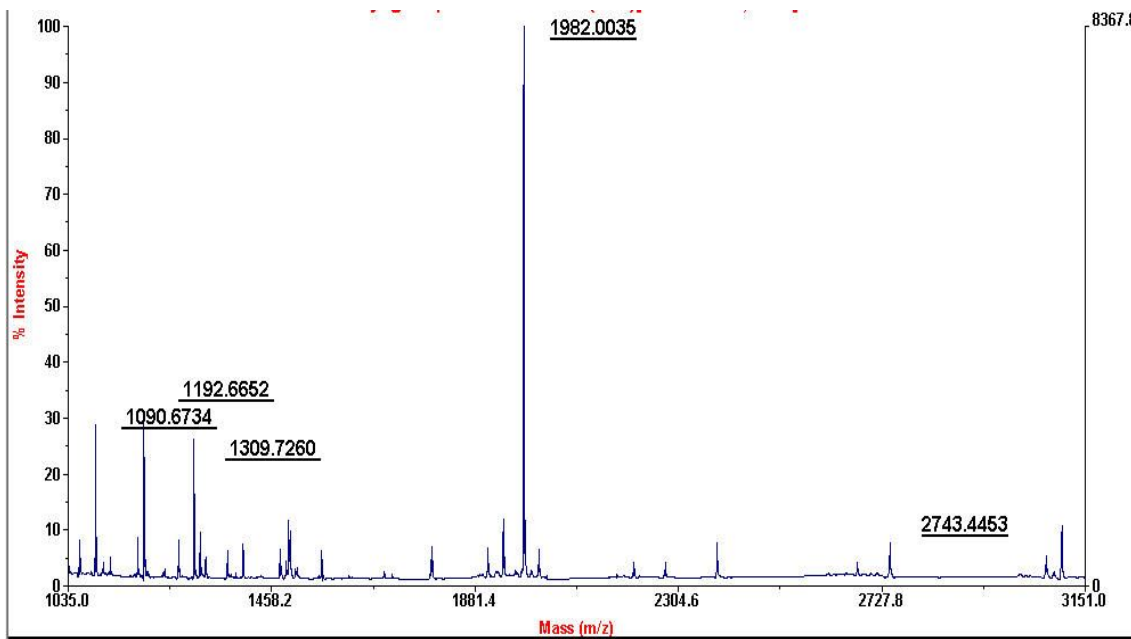

| Start - End                            | Observed  | Mr(expt)  | Mr(calc)  | Delta  | Miss Sequence          |
|----------------------------------------|-----------|-----------|-----------|--------|------------------------|
| 48 - 57                                | 1192.6652 | 1191.6579 | 1191.5520 | 0.1059 | 0 R.DETNYGIPQR.A       |
| 131 - 139                              | 1090.6734 | 1089.6661 | 1089.5641 | 0.1020 | 0 K.LWNTLVCK.Y         |
| 140 - 155                              | 1982.0035 | 1980.9962 | 1980.8636 | 0.1326 | 0 K.YTVQDESHSEWVSCVR.F |
| 186 - 212                              | 2743.4453 | 2742.4380 | 2742.3032 | 0.1348 | 0                      |
| <b>K.TNHIGHTGYLNTVTVSPDGSLCASGGK.D</b> |           |           |           |        |                        |
| 246 - 257                              | 1309.7260 | 1308.7187 | 1308.6536 | 0.0651 | 0 R.YWLCAATGPSIK.I     |

No match to: 1091.6548, 1296.7336, 1493.8292, 1496.7948, 1939.9688, 2384.1259

447 Potassium-transporting ATPase alpha chain 1



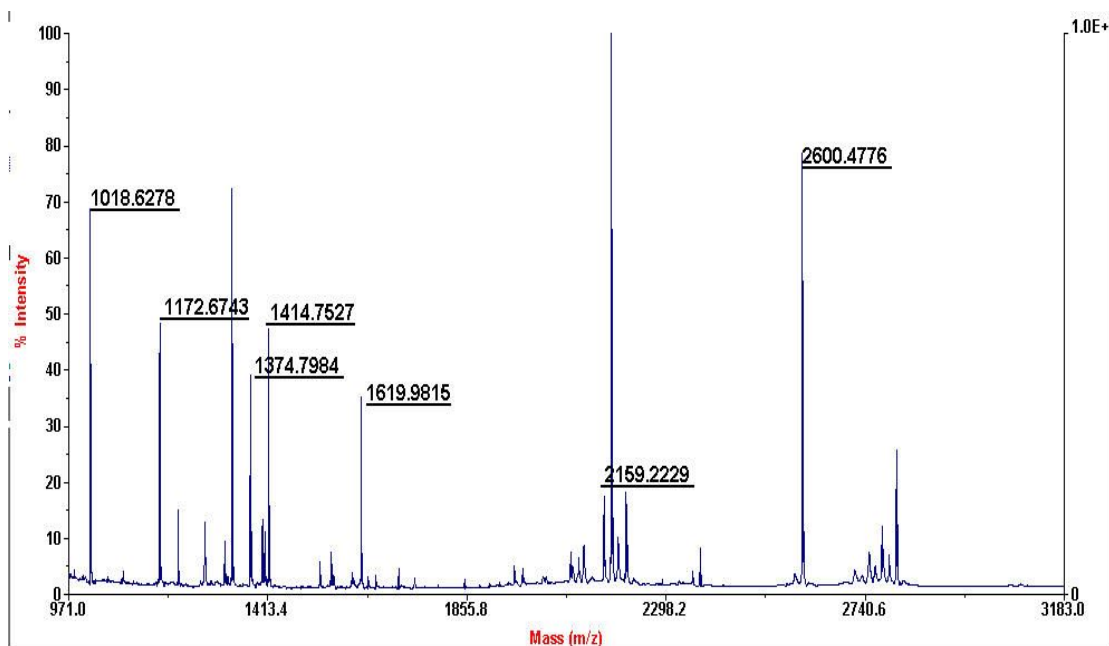

| Start - End                                | Observed  | Mr(expt)  | Mr(calc)  | Delta   | Miss Sequence               |
|--------------------------------------------|-----------|-----------|-----------|---------|-----------------------------|
| 1 - 25                                     | 2600.4776 | 2599.4703 | 2599.1934 | 0.2769  | 1                           |
| -.MGKAENYELYSVELGPGPGDMAAK.M Oxidation (M) |           |           |           |         |                             |
| 224 - 238                                  | 1619.9815 | 1618.9742 | 1618.7435 | 0.2308  | 0 K.VDNSSLTGESEPTQTR.S      |
| 362 - 370                                  | 1018.6278 | 1017.6205 | 1017.5641 | 0.0564  | 1 R.LASKNCVVK.N             |
| 442 - 455                                  | 1414.7527 | 1413.7454 | 1413.7616 | -0.0162 | 1 R.AAFKSGQDAVPVVK.R        |
| 608 - 618                                  | 1172.6743 | 1171.6670 | 1171.6383 | 0.0287  | 1 R.ATVPDAVLKCR.T           |
| 637 - 658                                  | 2159.2229 | 2158.2156 | 2158.1117 | 0.1039  | 0 K.AIAASVGIIEGSETVEDIAAR.L |
| 683 - 694                                  | 1374.7984 | 1373.7911 | 1373.6497 | 0.1415  | 0 K.DMDPSELVEALR.T          |

No match to: 1333.8606, 2176.2541, 2208.2765, 2809.5728

448 Heterogeneous nuclear ribonucleoproteins A2/B1

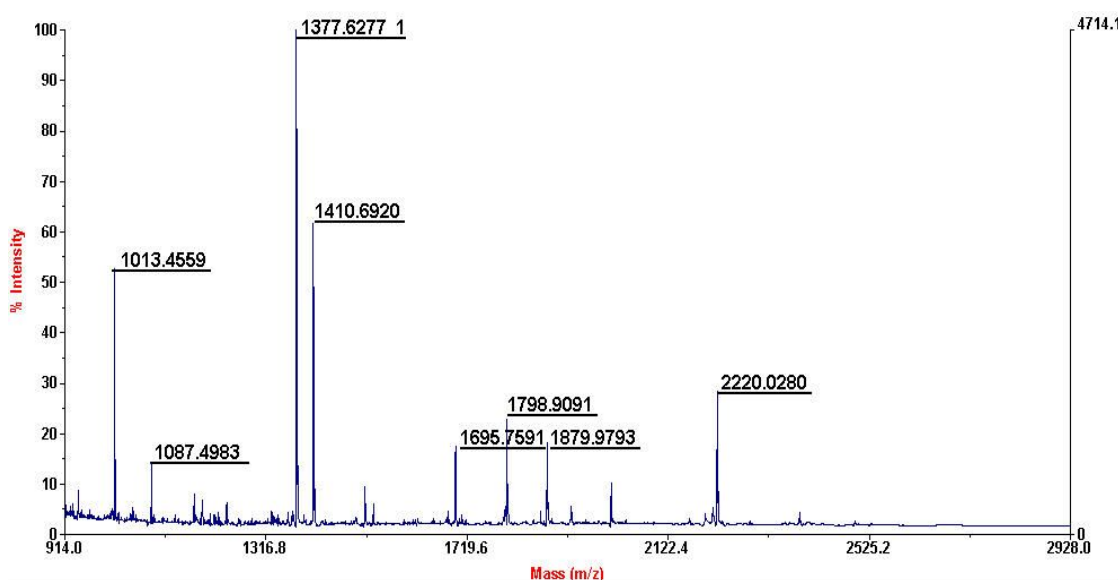

| Start - End | Observed  | Mr(expt)  | Mr(calc)  | Delta   | Miss Sequence            |
|-------------|-----------|-----------|-----------|---------|--------------------------|
| 23 - 38     | 1798.9091 | 1797.9018 | 1797.9149 | -0.0131 | 0 K.LFIGGLSFETTEESLR.N   |
| 39 - 46     | 1087.4983 | 1086.4910 | 1086.4770 | 0.0140  | 0 R.NYYEQWGK.L           |
| 114 - 129   | 1879.9793 | 1878.9721 | 1878.9588 | 0.0133  | 1 K.LFVGGIKEDTEEHHLR.D   |
| 130 - 147   | 2220.0280 | 2219.0207 | 2219.0634 | -0.0426 | 1 R.DYFEEYGKIDTIEIITDR.Q |
| 154 - 168   | 1695.7591 | 1694.7518 | 1694.7577 | -0.0059 | 0 R.GFGFVTFDDHDPVDK.I    |
| 174 - 185   | 1410.6920 | 1409.6848 | 1409.6800 | 0.0048  | 0 K.YHTINGHNAEVR.K       |
| 204 - 213   | 1013.4559 | 1012.4486 | 1012.4363 | 0.0123  | 0 R.GGNFGFGDSR.G         |
| 214 - 228   | 1377.6277 | 1376.6204 | 1376.6222 | -0.0018 | 0 R.GGGNFGPGPSNFR.G      |

No match to: 1411.6784, 2008.0264

449 Protein disulfide-isomerase A3 precursor

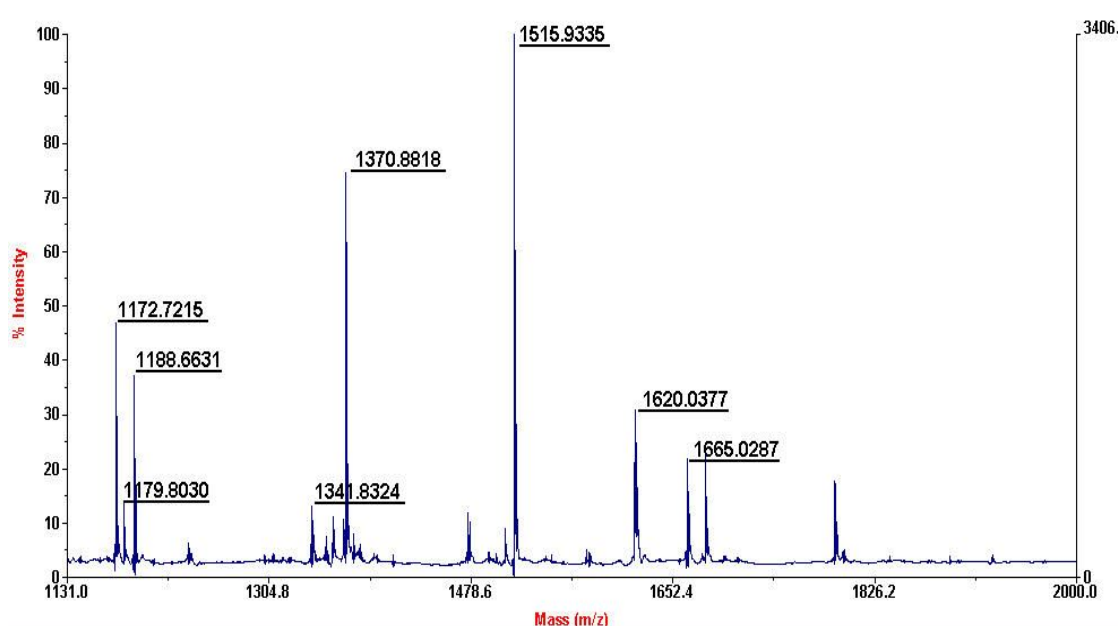

| Start - End | Observed  | Mr(expt)  | Mr(calc)  | Delta  | Miss Sequence                 |
|-------------|-----------|-----------|-----------|--------|-------------------------------|
| 174 - 183   | 1179.8030 | 1178.7958 | 1178.5792 | 0.2166 | 1 K.AASNLRDNYR.F              |
| 259 - 271   | 1620.0377 | 1619.0304 | 1618.7766 | 0.2538 | 0 K.DLLIYYDVDYEK.N            |
| 336 - 344   | 1172.7215 | 1171.7143 | 1171.5332 | 0.1811 | 0 K.FVMQEEFSR.D               |
| 336 - 344   | 1188.6631 | 1187.6558 | 1187.5281 | 0.1277 | 0 K.FVMQEEFSR.D Oxidation (M) |
| 352 - 363   | 1515.9335 | 1514.9262 | 1514.7518 | 0.1745 | 1 R.FLQDYFDGNLKR.Y            |
| 434 - 448   | 1665.0287 | 1664.0215 | 1663.7512 | 0.2703 | 0 K.MDATANDVSPYEV.R.G         |
| 449 - 460   | 1341.8324 | 1340.8251 | 1340.6765 | 0.1487 | 0 R.GFPTIYFSPANK.K            |
| 472 - 482   | 1370.8818 | 1369.8745 | 1369.6878 | 0.1867 | 0 R.ELSDFISYLQR.E             |

No match to: 1235.7030, 2575.6118, 2703.7733

#### 450 Glyoxylate reductase/hydroxypyruvate reductase

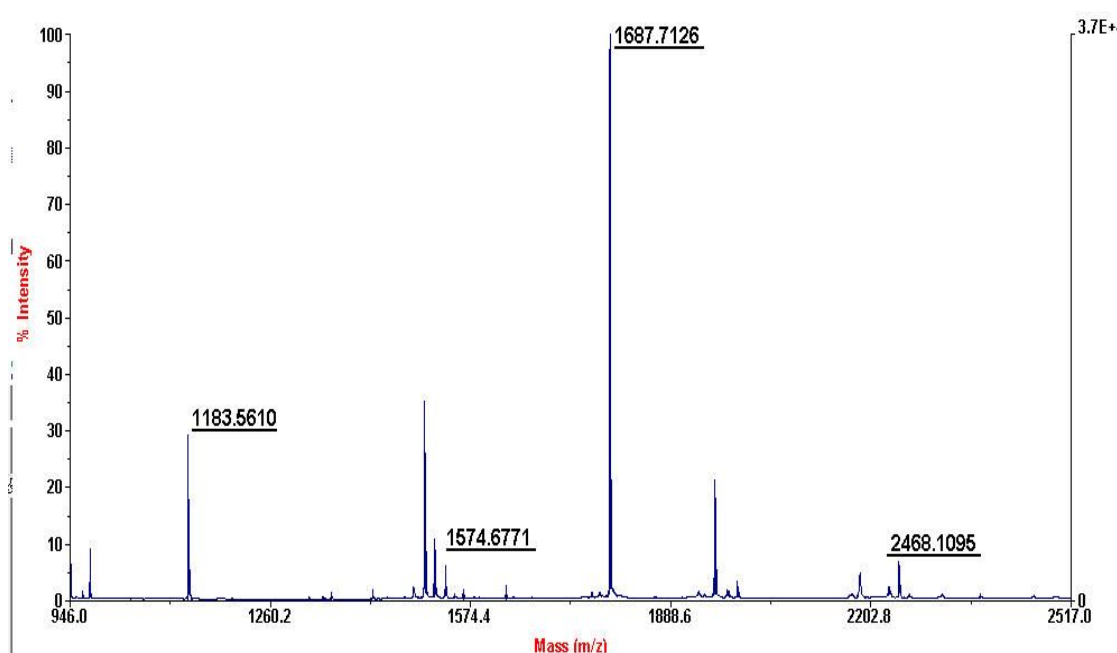

| Start - End | Observed  | Mr(expt)  | Mr(calc)  | Delta   | Miss Sequence                 |
|-------------|-----------|-----------|-----------|---------|-------------------------------|
| 1 - 8       | 1046.4115 | 1045.4043 | 1045.5889 | -0.1846 | 1 -.MRPVRLMK.V Oxidation (M)  |
| 26 - 47     | 2586.8919 | 2585.8846 | 2586.1544 | -0.2698 | 1 R.AADCEVEQWDSDEPIPAKELER.G  |
| 125 - 134   | 1183.5610 | 1182.5537 | 1182.6608 | -0.1071 | 1 R.RLPEAIEEVK.N              |
| 172 - 179   | 944.4934  | 943.4861  | 943.5603  | -0.0743 | 0 R.LKPFQVQR.F                |
| 263 - 286   | 2468.1095 | 2467.1022 | 2467.3686 | -0.2664 | 0 K.IAAAGLDVTSPEPLPTNHPLTLK.N |
| 287 - 300   | 1574.6771 | 1573.6698 | 1573.8147 | -0.1449 | 0 K.NCVILPHIGSATHR.T          |

303 - 318 1687.7126 1686.7053 1686.9086 -0.2034 0 R.NTMSLLAANNLLAGLR.G Oxidation

(M)

No match to: 1364.4979, 1377.5388, 1411.5571, 1790.7267

451 Iron-responsive element-binding protein 1 (IRE-BP 1)

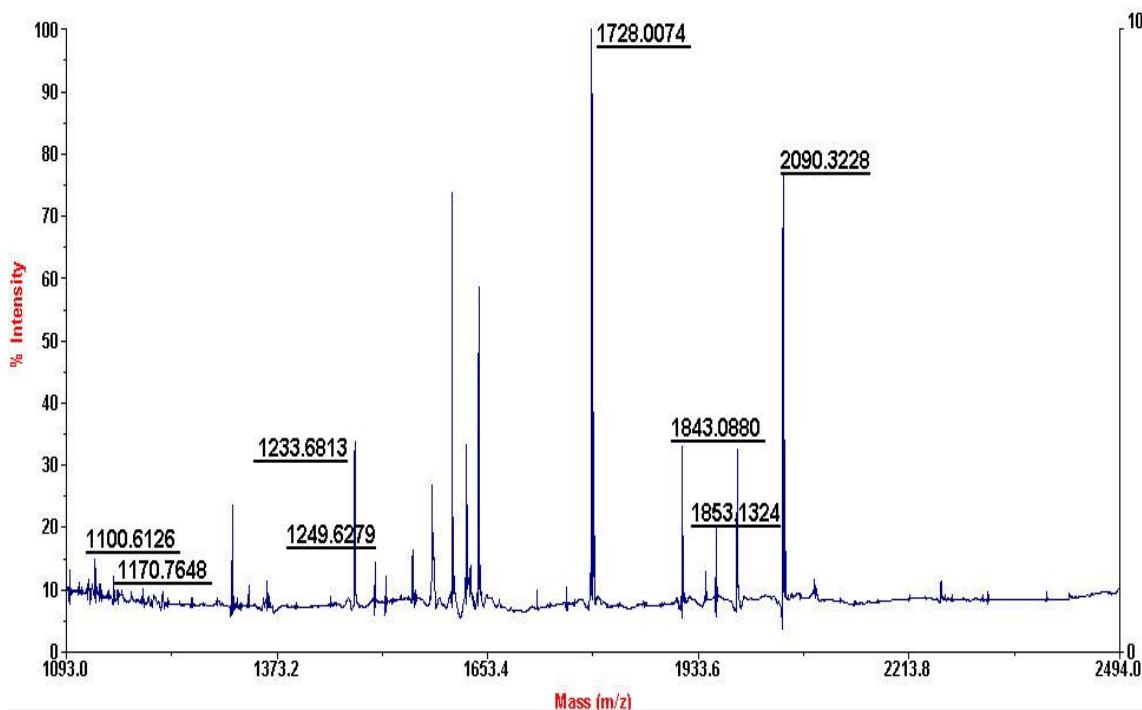

| Start - End | Observed  | Mr(expt)  | Mr(calc)  | Delta  | Miss Sequence                  |
|-------------|-----------|-----------|-----------|--------|--------------------------------|
| 57 - 72     | 2003.1868 | 2002.1796 | 2002.0384 | 0.1411 | 1 K.KQDIENILHWNVTQHK.N         |
| 73 - 82     | 1170.7648 | 1169.7576 | 1169.6557 | 0.1019 | 0 K.NIEVPFKPAR.V               |
| 142 - 149   | 1050.5759 | 1049.5686 | 1049.4778 | 0.0908 | 0 K.NQDLEFER.N                 |
| 159 - 168   | 1233.6813 | 1232.6740 | 1232.5509 | 0.1231 | 0 K.WGSQAFHNMR.I               |
| 159 - 168   | 1249.6279 | 1248.6206 | 1248.5458 | 0.0748 | 0 K.WGSQAFHNMR.I Oxidation (M) |
| 169 - 187   | 2090.3228 | 2089.3156 | 2089.1684 | 0.1472 | 0 R.IPPGSGIIHQVNLEYLAR.V       |
| 277 - 293   | 1853.1324 | 1852.1251 | 1851.9519 | 0.1732 | 0 K.FVEFFGPGVAQLSIADR.A        |
| 336 - 344   | 1100.6126 | 1099.6053 | 1099.5484 | 0.0569 | 0 K.YLQAVGMFR.D Oxidation (M)  |
| 588 - 601   | 1728.0074 | 1727.0001 | 1726.8638 | 0.1363 | 1 K.DIWPTRDEIQAVER.Q           |
| 594 - 601   | 959.5148  | 958.5076  | 958.4720  | 0.0356 | 0 R.DEIQAVER.Q                 |
| 645 - 660   | 1843.0880 | 1842.0807 | 1841.9563 | 0.1244 | 0 K.SPPFFENLTLDLQPPK.S         |

No match to: 1189.5531, 2087.2491, 2390.4313, 2407.4304, 2969.8731, 2970.3727

452 Lamin-A/C

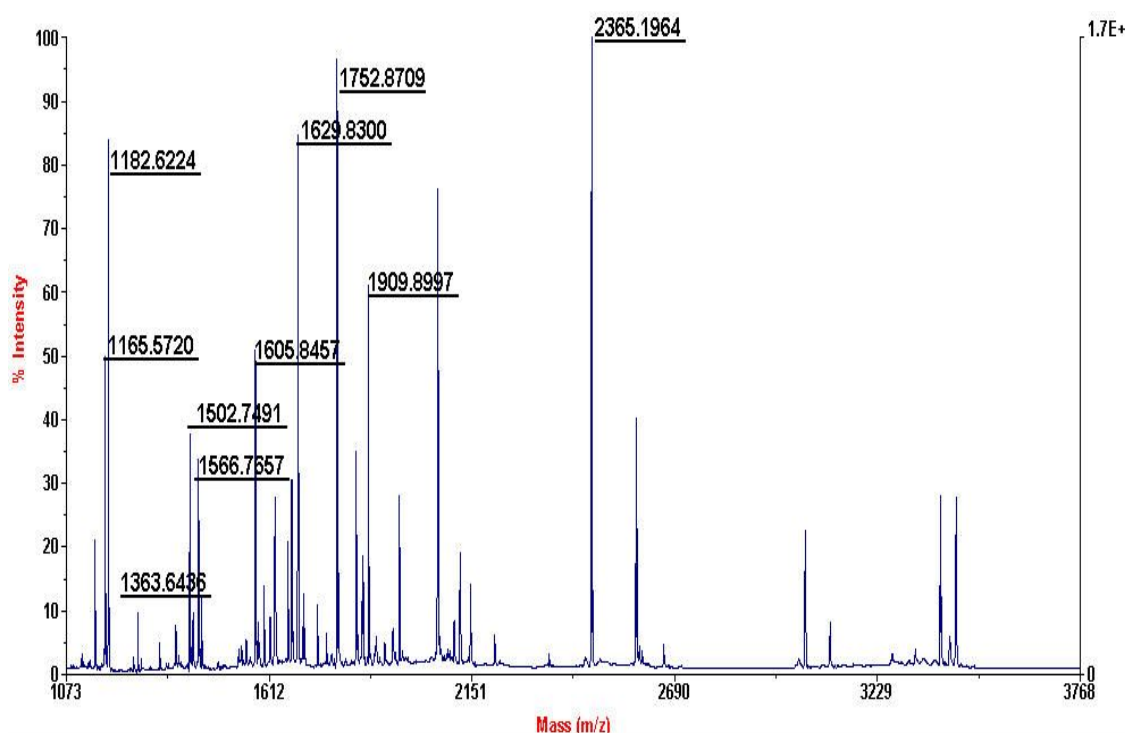

| Start - End                     | Observed  | Mr(expt)  | Mr(calc)  | Delta   | Miss Sequence                   |
|---------------------------------|-----------|-----------|-----------|---------|---------------------------------|
| 29 - 41                         | 1629.8300 | 1628.8227 | 1628.8005 | 0.0222  | 1 R.LQEKEDLQELNDR.L             |
| 79 - 89                         | 1165.5720 | 1164.5647 | 1164.5411 | 0.0236  | 0 K.AAYEAE LGDAR.K              |
| 157 - 166                       | 1182.6224 | 1181.6152 | 1181.6040 | 0.0111  | 0 R.TLEGELHDLR.G                |
| 209 - 216                       | 1023.5126 | 1022.5053 | 1022.5032 | 0.0021  | 0 K.NIYSEELR.E                  |
| 250 - 261                       | 1502.7491 | 1501.7418 | 1501.7161 | 0.0257  | 1 R.AQHEDQVEQYKK.E              |
| 281 - 296                       | 1752.8709 | 1751.8637 | 1751.8550 | 0.0086  | 0 R.NSNLVGAAHEELQQR.I           |
| 352 - 366                       | 1909.8997 | 1908.8925 | 1908.9139 | -0.0214 | 0 R.MQQQLDEYQELLDIK.L Oxidation |
| (M)                             |           |           |           |         |                                 |
| 440 - 453                       | 1605.8457 | 1604.8384 | 1604.8046 | 0.0338  | 1 R.VAVEEVDEEGKFVR.L            |
| 516 - 527                       | 1363.6436 | 1362.6363 | 1362.6099 | 0.0264  | 0 K.AQNTWGCNSLR.T               |
| 598 - 624                       | 2365.1964 | 2364.1891 | 2364.1517 | 0.0373  | 0                               |
| K.ASASGSGAQVGGPISSGSSASSVTVTR.S |           |           |           |         |                                 |
| 628 - 644                       | 1566.7657 | 1565.7584 | 1565.7434 | 0.0150  | 0 R.SVGGSGGGSFGDNLVTR.S         |

No match to: 1274.6034, 1639.8666, 1910.9199, 2045.0828, 2364.1739

453 WD repeat protein 1

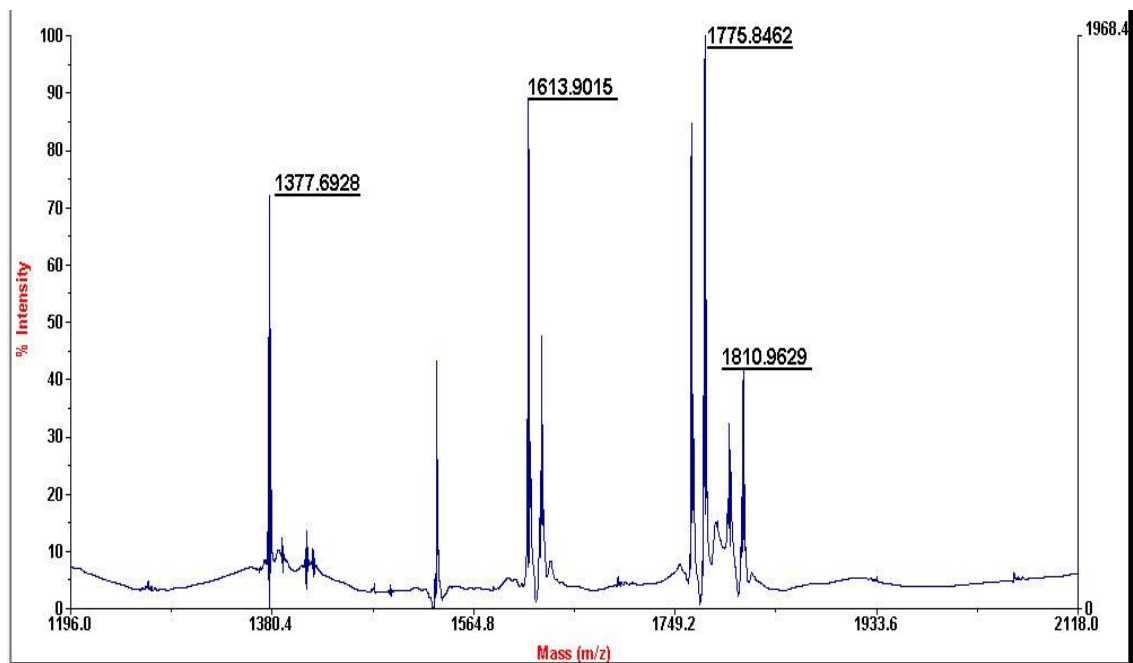

| Start - End | Observed  | Mr(expt)  | Mr(calc)  | Delta   | Miss Sequence                |
|-------------|-----------|-----------|-----------|---------|------------------------------|
| 7 - 17      | 1273.6197 | 1272.6124 | 1272.7190 | -0.1066 | 1 K.KVFASLPQVER.G            |
| 8 - 17      | 1145.5373 | 1144.5300 | 1144.6241 | -0.0940 | 0 K.VFASLPQVER.G             |
| 66 - 81     | 1618.6237 | 1617.6165 | 1617.7675 | -0.1510 | 0 K.YAPSGFYIASGDVSGK.L       |
| 96 - 104    | 1102.4120 | 1101.4048 | 1101.5131 | -0.1083 | 0 K.YEYQPFAGK.I              |
| 162 - 180   | 2043.7236 | 2042.7163 | 2042.9044 | -0.1881 | 0 R.LATGSDDNCAAFFEGPPFK.F    |
| 204 - 219   | 1719.6577 | 1718.6504 | 1718.8152 | -0.1647 | 0 R.FATASADGQIYIYDGK.T       |
| 471 - 484   | 1537.7140 | 1536.7067 | 1536.8399 | -0.1332 | 1 R.LYSILGTTLKDEGK.L         |
| 490 - 511   | 2279.8629 | 2278.8557 | 2279.0529 | -0.1972 | 0 K.GPVTDVAYSHDGAFLAVCDASK.V |

No match to: 918.3681, 1101.4142, 1461.6547, 1752.7174, 2418.0330, 3397.3271

454 Olfactory receptor 10X1

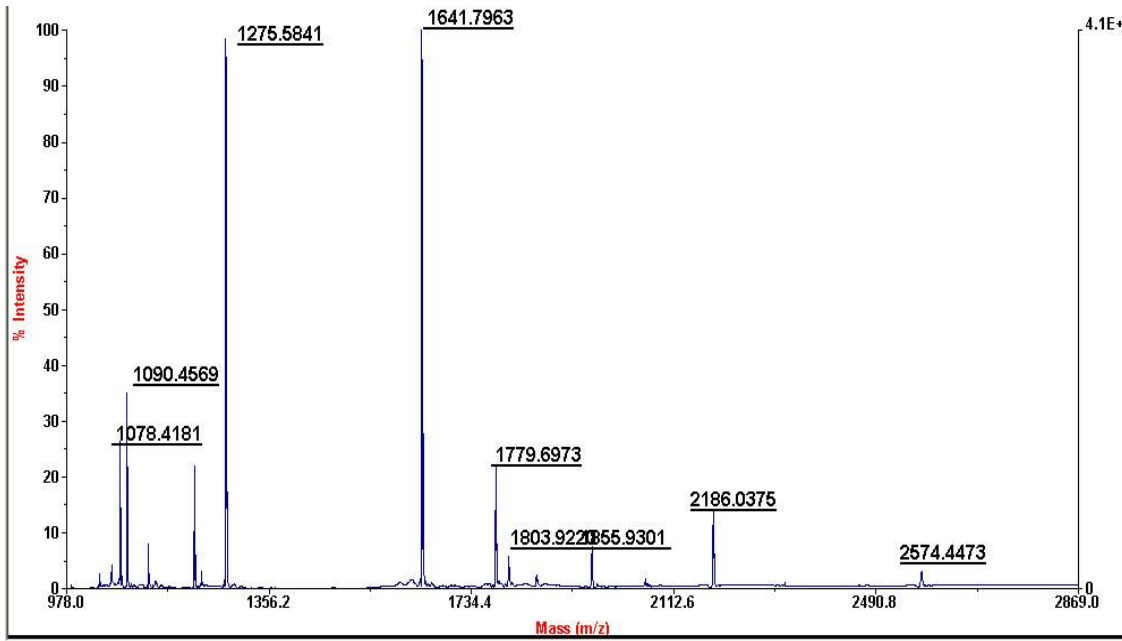

| Start - End   | Observed  | Mr(expt)  | Mr(calc)  | Delta   | Miss Sequence               |               |
|---------------|-----------|-----------|-----------|---------|-----------------------------|---------------|
| 1 - 9         | 1104.6246 | 1103.6173 | 1103.6372 | -0.0199 | 1 -.MKINQTLK.E              | Oxidation (M) |
| 122 - 130     | 1103.5446 | 1102.5373 | 1102.5957 | -0.0584 | 0 R.FLAICNPLR.Y             |               |
| 165 - 174     | 1235.5166 | 1234.5093 | 1234.6128 | -0.1035 | 0 R.DSFCRPNLVK.H            |               |
| 165 - 185     | 2549.4011 | 2548.3939 | 2548.2654 | 0.1285  | 1 R.DSFCRPNLVKHFFCHMLAVIR.L |               |
| Oxidation (M) |           |           |           |         |                             |               |
| 299 - 308     | 1120.6050 | 1119.5978 | 1119.5892 | 0.0085  | 1 R.RMMGNTVALK.K            |               |
| 299 - 308     | 1136.6057 | 1135.5984 | 1135.5842 | 0.0142  | 1 R.RMMGNTVALK.K            | Oxidation (M) |

No match to: 1195.5597, 1283.6196, 1509.6975, 1586.8059, 1640.8420

455 Tropomyosin alpha-4 chain (Tropomyosin-4)

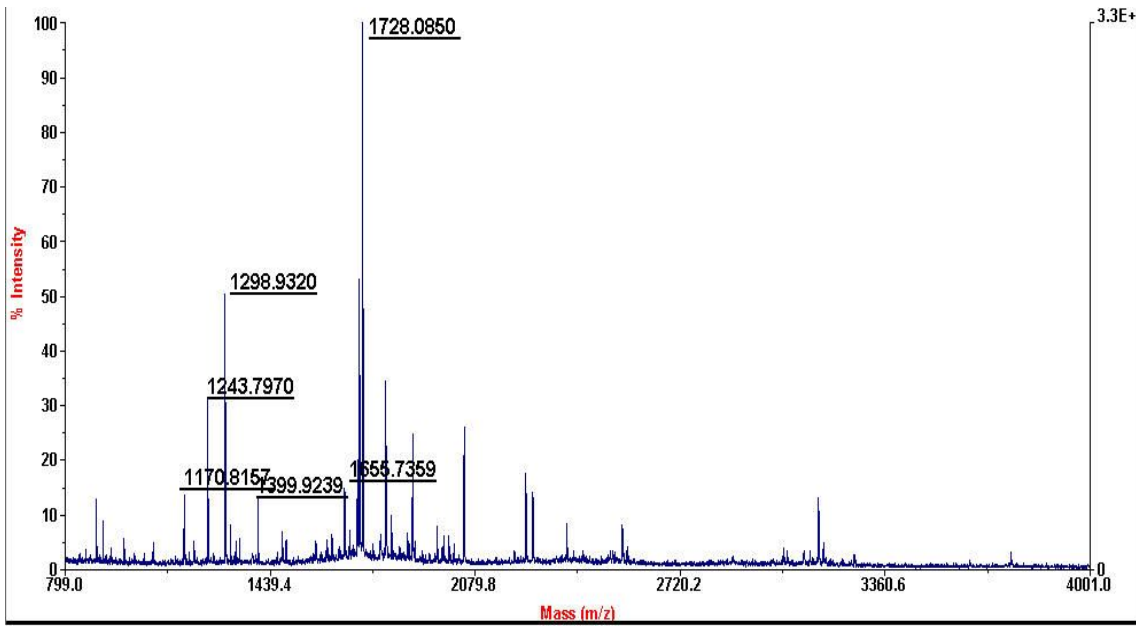

| Start - End | Observed  | Mr(expt)  | Mr(calc)  | Delta   | Miss Sequence        |
|-------------|-----------|-----------|-----------|---------|----------------------|
| 55 - 65     | 1399.9239 | 1398.9167 | 1398.7467 | 0.1700  | 1 R.RIQLVEEELDR.A    |
| 56 - 65     | 1243.7970 | 1242.7897 | 1242.6456 | 0.1442  | 0 R.IQLVEEELDR.A     |
| 56 - 69     | 1728.0850 | 1727.0777 | 1726.8849 | 0.1928  | 1 R.IQLVEEELDRAQER.L |
| 132 - 142   | 1298.9320 | 1297.9247 | 1297.7605 | 0.1642  | 1 R.KLVILEGELER.A    |
| 133 - 142   | 1170.8157 | 1169.8084 | 1169.6656 | 0.1429  | 0 K.LVILEGELER.A     |
| 133 - 146   | 1655.7359 | 1654.7286 | 1654.8889 | -0.1603 | 1 K.LVILEGELERAEER.A |

No match to: 1582.3723, 1710.9294, 1717.0244, 1800.1930, 1884.1920, 2044.2554, 2237.3960, 2259.3760

456 Zinc finger protein 57 - Homo sapiens (Human)

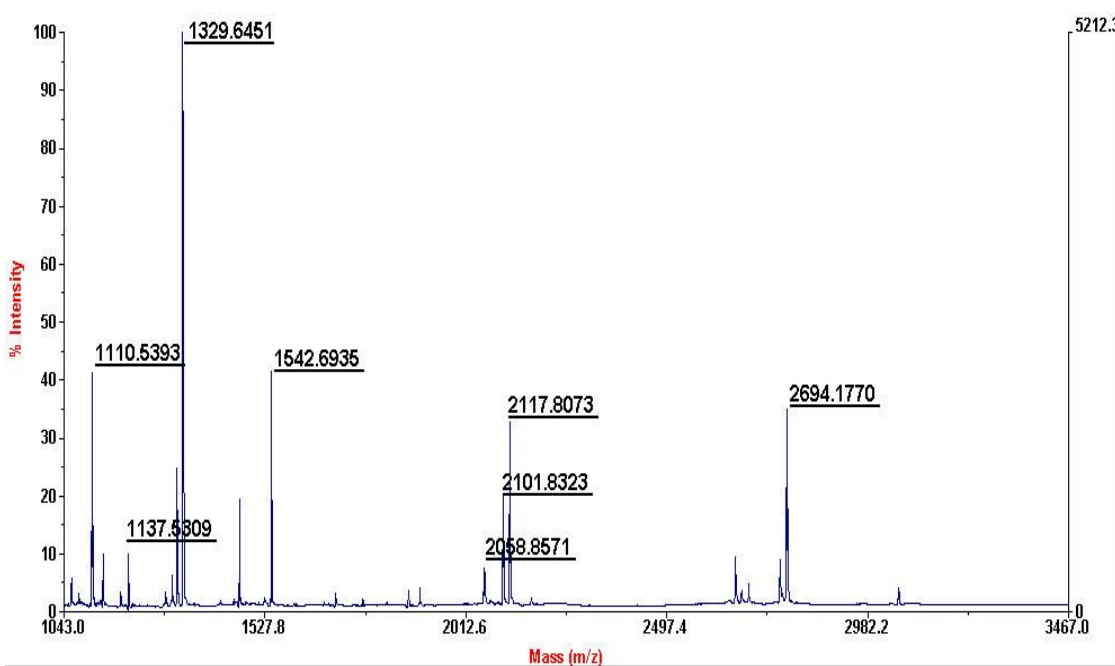



| Start - End | Observed  | Mr(expt)  | Mr(calc)  | Delta   | Miss Sequence                 |
|-------------|-----------|-----------|-----------|---------|-------------------------------|
| 175 - 197   | 2694.1770 | 2693.1697 | 2693.2438 | -0.0741 | 1 K.QACICPSHLHSHGRTDTEEKPYK.R |
| 189 - 197   | 1110.5393 | 1109.5320 | 1109.5240 | 0.0080  | 0 R.TDTEEKPYK.R               |
| 199 - 209   | 1329.6451 | 1328.6379 | 1328.6044 | 0.0334  | 0 R.QACGQTFQHPR.Y             |
| 270 - 287   | 2101.8323 | 2100.8251 | 2100.9292 | -0.1041 | 1 R.HMTTHTGEKPYKCQHCGK.A      |

Oxidation (M)

|           |           |           |           |         |                           |
|-----------|-----------|-----------|-----------|---------|---------------------------|
| 312 - 324 | 1542.6935 | 1541.6862 | 1541.7297 | -0.0435 | 1 K.QCGKTFSWSETLR.V       |
| 335 - 343 | 1137.5309 | 1136.5236 | 1136.5107 | 0.0130  | 1 K.LYKCEHCGK.A           |
| 350 - 367 | 2117.8073 | 2116.8000 | 2117.0112 | -0.2113 | 1 R.SFQGHLRHTHTGEKPYECK.Q |
| 480 - 496 | 2058.8571 | 2057.8499 | 2057.9854 | -0.1355 | 1 K.QCGKTFTWSSTLHNHVR.M   |

No match to: 943.5523, 1109.5607, 1315.5724, 1465.7681, 2769.3093, 2786.2987

457 Actin, alpha cardiac muscle 1

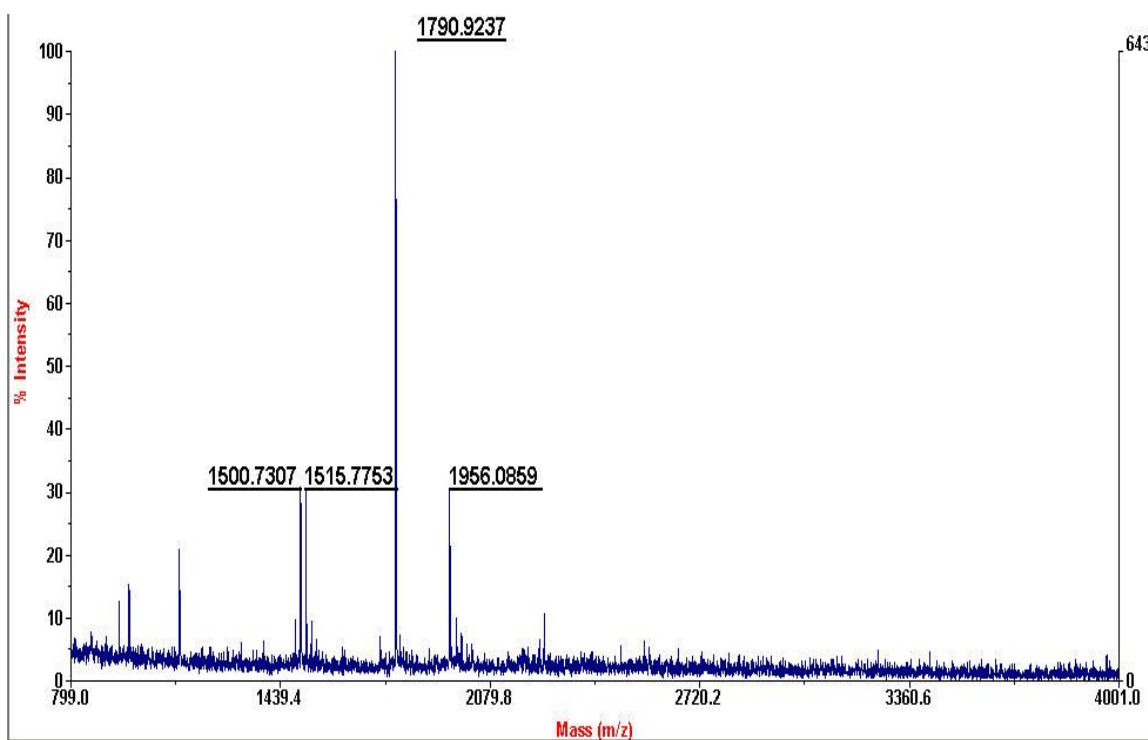

| Start - End | Observed  | Mr(expt)  | Mr(calc)  | Delta  | Miss Sequence            |
|-------------|-----------|-----------|-----------|--------|--------------------------|
| 21 - 30     | 976.4800  | 975.4728  | 975.4410  | 0.0317 | 0 K.AGFAGDDAPR.A         |
| 87 - 97     | 1515.7753 | 1514.7680 | 1514.7419 | 0.0261 | 0 K.IWHHTFYNELR.V        |
| 98 - 115    | 1956.0859 | 1955.0786 | 1955.0364 | 0.0423 | 0 R.VAPEEHPTLLTEAPLNPK.A |

|           |           |           |           |        |   |                      |
|-----------|-----------|-----------|-----------|--------|---|----------------------|
| 199 - 208 | 1130.5803 | 1129.5730 | 1129.5404 | 0.0326 | 0 | R.GYSFVTTAER.E       |
| 241 - 256 | 1790.9237 | 1789.9164 | 1789.8846 | 0.0318 | 0 | K.SYELPDGQVITIGNER.F |
| 362 - 374 | 1500.7307 | 1499.7234 | 1499.7005 | 0.0230 | 0 | K.QEYDEAGPSIVHR.K    |

No match to: 1132.5628, 1499.7053, 1516.7246, 1954.1219, 1955.1143

458 Reticulocalbin-1 precursor

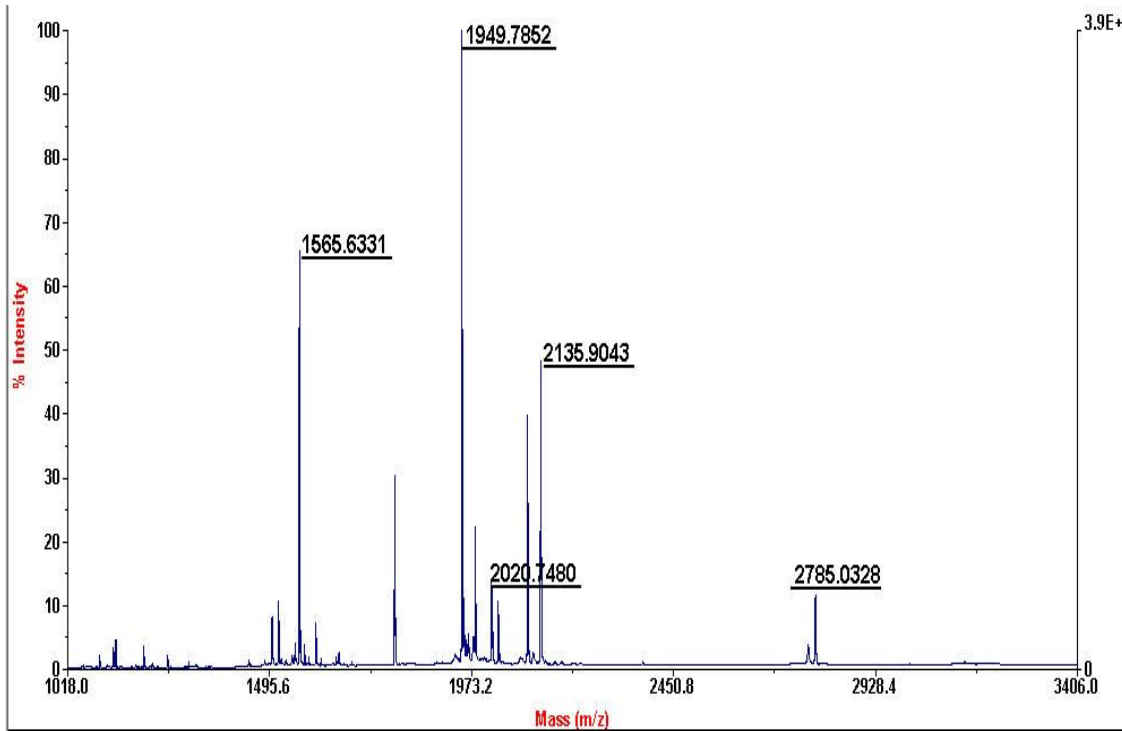

| Start - End | Observed  | Mr(expt)  | Mr(calc)  | Delta   | Miss Sequence                 |
|-------------|-----------|-----------|-----------|---------|-------------------------------|
| 71 - 83     | 1565.6331 | 1564.6259 | 1564.7369 | -0.1110 | 1 K.TFDQLTPDESKER.L           |
| 87 - 105    | 2135.9043 | 2134.8970 | 2135.0383 | -0.1412 | 1 K.IVDRIDNDGDGFVTTEELK.T     |
| 123 - 129   | 981.3931  | 980.3858  | 980.4716  | -0.0857 | 1 K.VWKDYDR.D                 |
| 142 - 165   | 2785.0328 | 2784.0255 | 2784.2205 | -0.1949 | 0 K.QATYGYLGNPAEFHDSSDHHTFK.K |
| 189 - 204   | 2020.7480 | 2019.7407 | 2019.9036 | -0.1629 | 0 R.EEFTAFLHPEEFHMK.E         |
| 250 - 256   | 969.3785  | 968.3713  | 968.4352  | -0.0639 | 0 R.EQFNEFR.D                 |
| 271 - 286   | 1949.7852 | 1948.7780 | 1948.9180 | -0.1400 | 0 R.HWILPQDYDHAQAEAR.H        |

No match to: 951.3513, 1790.7575, 1948.7040, 1981.7625, 2104.7934

459 Secernin-2

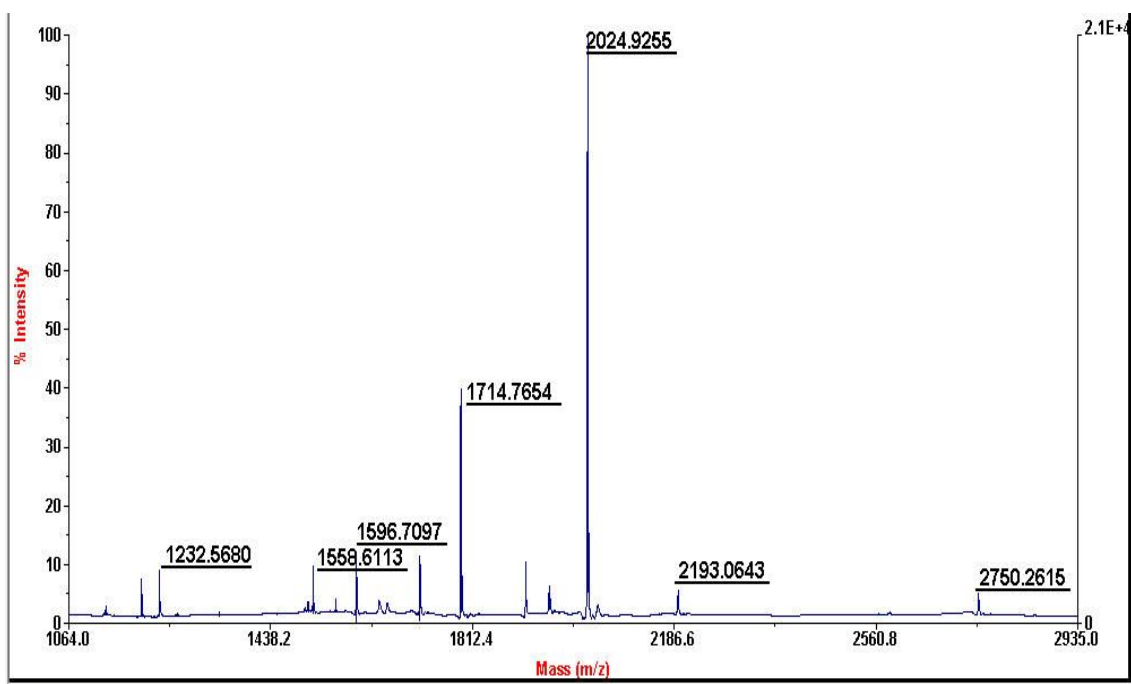

| Start - End                         | Observed  | Mr(expt)  | Mr(calc)  | Delta   | Miss Sequence                    |
|-------------------------------------|-----------|-----------|-----------|---------|----------------------------------|
| 32 - 56                             | 2750.2615 | 2749.2543 | 2749.3532 | -0.0990 | 1                                |
| <b>K.NSDRPRDEVQEVVFPAGTHTPGSR.L</b> |           |           |           |         |                                  |
| 38 - 56                             | 2024.9255 | 2023.9182 | 2023.9964 | -0.0782 | 0 R.DEVQEVVFPAGTHTPGSR.L         |
| 57 - 69                             | 1596.7097 | 1595.7024 | 1595.7865 | -0.0841 | 0 R.LQCTYIEVEQVSK.T              |
| 104 - 119                           | 1714.7654 | 1713.7582 | 1713.8607 | -0.1026 | 0 K.EPVGEGEALLGMDLLR.L Oxidation |
| <b>(M)</b>                          |           |           |           |         |                                  |
| 167 - 177                           | 1232.5680 | 1231.5607 | 1231.6197 | -0.0590 | 0 R.TEAWVLETAGR.L                |
| 190 - 209                           | 2193.0643 | 2192.0571 | 2192.1185 | -0.0615 | 0 R.NISNQLSIGTDISAQHPELR.T       |
| 271 - 284                           | 1558.6113 | 1557.6040 | 1557.6552 | -0.0511 | 1 R.DKESGICMDSGGFR.T             |
| 361 - 371                           | 1198.5938 | 1197.5865 | 1197.5924 | -0.0059 | 0 R.GHQAALGLMER.D Oxidation (M)  |

No match to: 1516.6230, 1639.8499, 1790.8185, 1910.8635, 1953.9697, 2705.5450

460 Aminoacylase-1

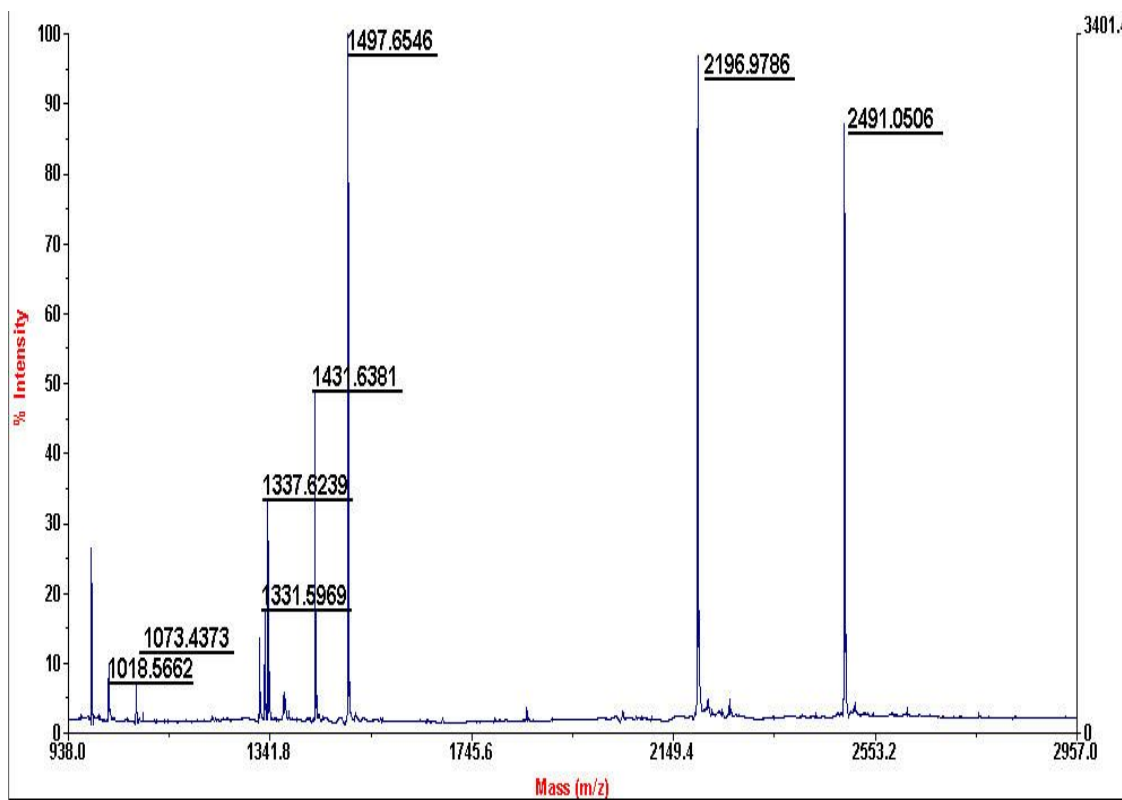

| Start - End | Observed  | Mr(expt)  | Mr(calc)  | Delta   | Miss Sequence                      |
|-------------|-----------|-----------|-----------|---------|------------------------------------|
| 5 - 17      | 1497.6546 | 1496.6474 | 1496.7260 | -0.0786 | 0 K.GPEEEHPSVTLFR.Q                |
| 24 - 43     | 2196.9786 | 2195.9713 | 2196.0851 | -0.1139 | 0 R.TVQPKPDYGAAVAFFEETAR.Q         |
| 101 - 109   | 1073.4373 | 1072.4300 | 1072.4825 | -0.0525 | 0 K.DSEGYIYAR.G                    |
| 116 - 126   | 1337.6239 | 1336.6166 | 1336.6809 | -0.0643 | 0 K.CVSIQYLEAVR.R                  |
| 169 - 191   | 2491.0506 | 2490.0433 | 2490.1703 | -0.1270 | 0 R.AGFALDEGIANPTDAFTVFYSER.S      |
| 222 - 230   | 1018.5662 | 1017.5589 | 1017.5971 | -0.0382 | 0 K.VVNSILAFR.E                    |
| 354 - 367   | 1431.6381 | 1430.6308 | 1430.7340 | -0.1032 | 0 R.AVGVPALGFSPMNR.T Oxidation (M) |
| 368 - 378   | 1331.5969 | 1330.5896 | 1330.6630 | -0.0734 | 0 R.TPVLLHDHDER.L                  |
| 379 - 386   | 984.5106  | 983.5034  | 983.5552  | -0.0519 | 0 R.LHEAVFLR.G                     |

No match to: 1320.6066, 1371.2427

461 Alcohol dehydrogenase [NADP+]

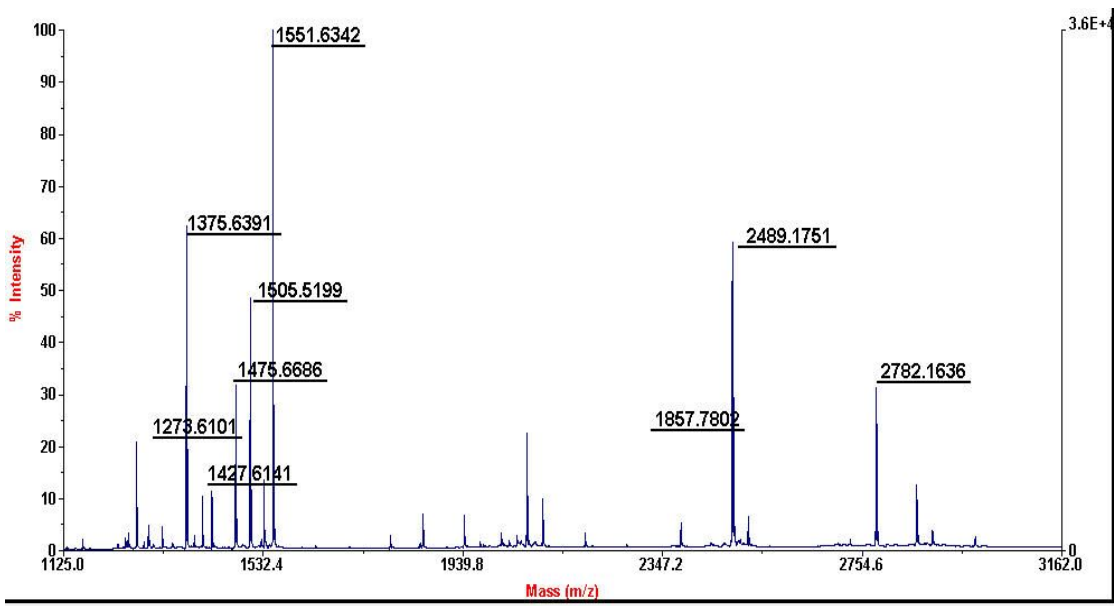

| Start - End                          | Observed  | Mr(expt)  | Mr(calc)  | Delta   | Miss Sequence                |
|--------------------------------------|-----------|-----------|-----------|---------|------------------------------|
| 35 - 42                              | 928.3831  | 927.3759  | 927.4814  | -0.1055 | 0 K.YALSVGYR.H               |
| 43 - 68                              | 2782.1636 | 2781.1563 | 2781.3279 | -0.1716 | 1                            |
| <b>R.HIDCAAIYGNPEIGEALKEDVGPGK.A</b> |           |           |           |         |                              |
| 69 - 80                              | 1375.6391 | 1374.6319 | 1374.7507 | -0.1188 | 1 K.AVPREELFVTSK.L           |
| 86 - 97                              | 1427.6141 | 1426.6068 | 1426.7317 | -0.1249 | 1 K.HHPEDVEPALRK.T           |
| 154 - 167                            | 1475.6686 | 1474.6613 | 1474.7892 | -0.1279 | 0 K.GLVQALGLSNFNSR.Q         |
| 204 - 218                            | 1551.6342 | 1550.6269 | 1550.7576 | -0.1307 | 0 R.GLEVTAYSPLGSSDR.A        |
| 219 - 240                            | 2489.1751 | 2488.1678 | 2488.3213 | -0.1535 | 1 R.AWRDPDEPVLLLEPVVLALAEK.Y |
| 241 - 251                            | 1273.6101 | 1272.6029 | 1272.7302 | -0.1274 | 1 K.YGRSPAQILLR.W            |
| 310 - 325                            | 1857.7802 | 1856.7729 | 1856.8846 | -0.1117 | 1 R.VPRDAGHPLYPFNDPY.-       |
| 313 - 325                            | 1505.5199 | 1504.5126 | 1504.6623 | -0.1497 | 0 R.DAGHPLYPFNDPY.-          |

No match to: 1533.6352, 2069.9316, 2101.9281, 2865.3492

462 Transcription elongation factor A protein 1

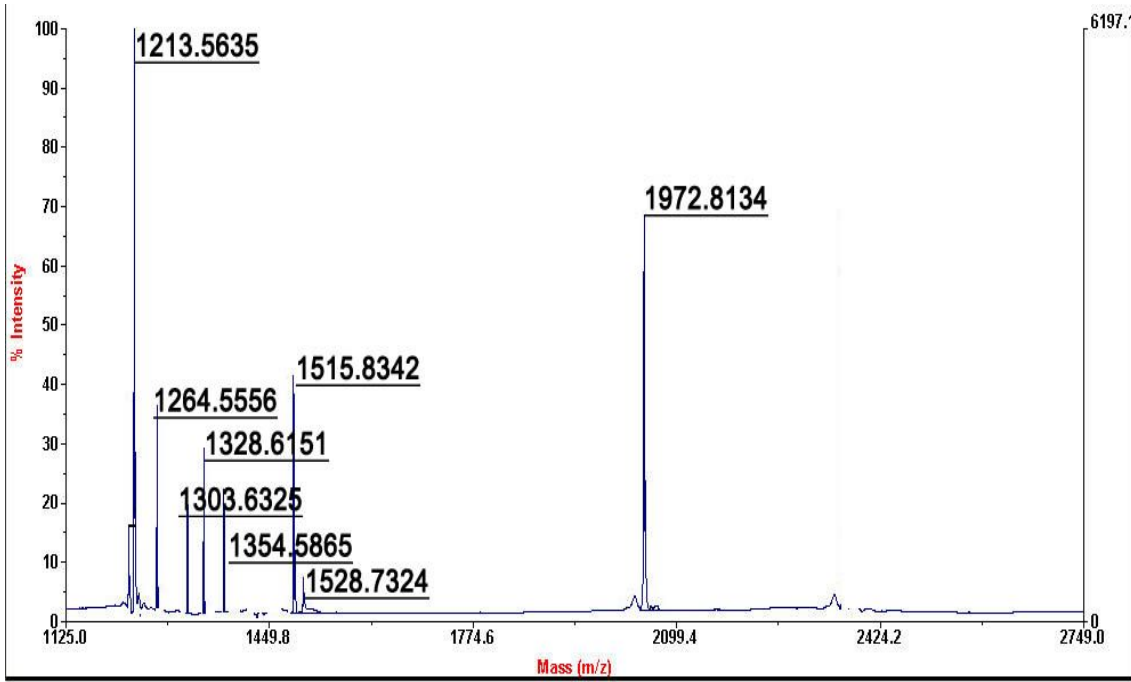

| Start - End | Observed  | Mr(expt)  | Mr(calc)  | Delta   | Miss Sequence            |
|-------------|-----------|-----------|-----------|---------|--------------------------|
| 33 - 45     | 1515.8342 | 1514.8269 | 1514.8126 | 0.0143  | 0 K.NIPMTLELLQSTR.I      |
| 209 - 222   | 1528.7324 | 1527.7251 | 1527.7868 | -0.0617 | 0 K.NVLCGNIPPDLFAR.M     |
| 223 - 234   | 1354.5865 | 1353.5792 | 1353.5792 | 0.0000  | 0 R.MTAEEMASDELK.E       |
| 253 - 265   | 1328.6151 | 1327.6078 | 1327.6078 | -0.0000 | 0 K.TGGTQTDLFTCGK.C      |
| 270 - 279   | 1213.5635 | 1212.5562 | 1212.5557 | 0.0005  | 0 K.NCTYTQVQTR.S         |
| 280 - 297   | 1972.8134 | 1971.8061 | 1971.8125 | -0.0064 | 0 R.SADEPMTTFVVCNECGNR.W |

No match to: 1070.5105, 1264.5556, 1303.6325

#### 463 Protein disulfide-isomerase

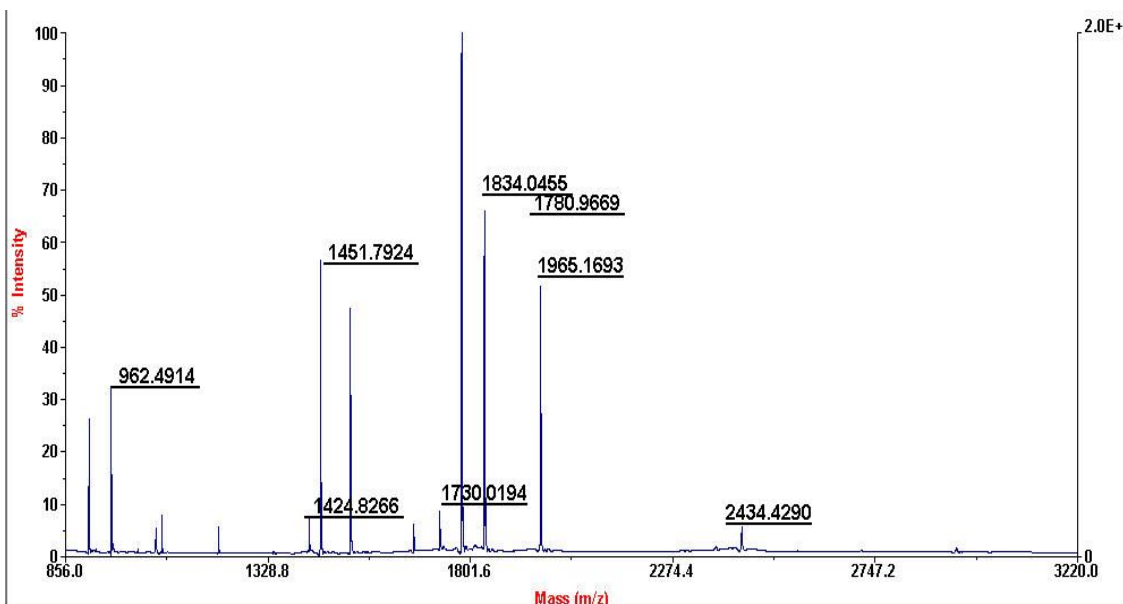

| Start - End | Observed  | Mr(expt)  | Mr(calc)  | Delta  | Miss Sequence              |
|-------------|-----------|-----------|-----------|--------|----------------------------|
| 82 - 97     | 1780.9669 | 1779.9597 | 1779.8275 | 0.1321 | 0 K.VDATEESDLAQQYGVR.G     |
| 196 - 207   | 1424.8266 | 1423.8193 | 1423.7711 | 0.0482 | 1 K.YQLDKDGVVLFK.K         |
| 231 - 247   | 1965.1693 | 1964.1620 | 1964.0367 | 0.1253 | 0 K.HNQLPLVIEFTEQTAPK.I    |
| 286 - 300   | 1834.0455 | 1833.0382 | 1832.9057 | 0.1325 | 0 K.ILFIFIDSDHTDNQR.I      |
| 327 - 338   | 1451.7924 | 1450.7851 | 1450.6939 | 0.0912 | 0 K.YKPESEELTAER.I         |
| 339 - 345   | 962.4914  | 961.4841  | 961.4440  | 0.0401 | 0 R.ITEFCHR.F              |
| 351 - 370   | 2434.4290 | 2433.4217 | 2433.2362 | 0.1855 | 1 K.IKPHLMSQELPEDWDKQPVK.V |

Oxidation (M)

|           |           |           |           |        |                       |
|-----------|-----------|-----------|-----------|--------|-----------------------|
| 410 - 424 | 1730.0194 | 1729.0121 | 1728.9046 | 0.1075 | 1 K.LGETYKDHENIVIAK.M |
| 445 - 452 | 910.4555  | 909.4483  | 909.4345  | 0.0138 | 0 K.FFPASADR.T        |

No match to: 1080.6237, 1521.8388, 1668.9680

464 Tubulin beta-2C chain

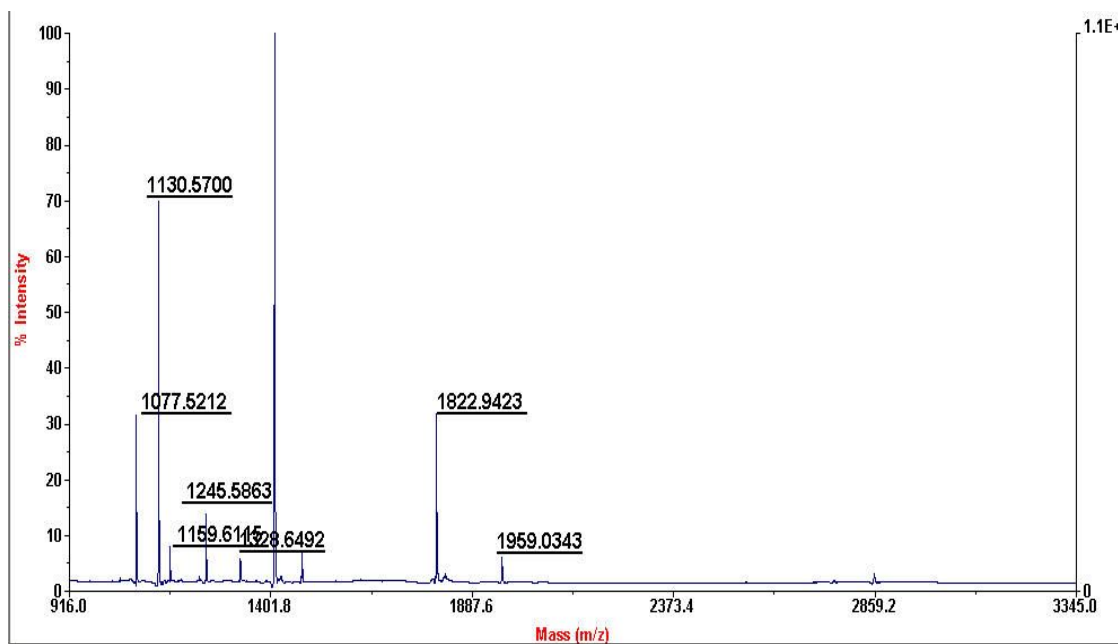

| Start - End | Observed  | Mr(expt)  | Mr(calc)  | Delta   | Miss Sequence                  |
|-------------|-----------|-----------|-----------|---------|--------------------------------|
| 3 - 19      | 1822.9423 | 1821.9351 | 1821.9156 | 0.0195  | 0 R.EIVHLQAGQCGNQIGAK.F        |
| 47 - 58     | 1328.6492 | 1327.6420 | 1327.6408 | 0.0012  | 0 R.INVYYNEATGGK.Y             |
| 104 - 121   | 1959.0343 | 1958.0271 | 1957.9745 | 0.0525  | 0 K.GHYTEGAELVDSVLDVVR.K       |
| 155 - 162   | 1077.5212 | 1076.5140 | 1076.5250 | -0.0111 | 1 K.IREEYPDR.I                 |
| 242 - 251   | 1130.5700 | 1129.5627 | 1129.5880 | -0.0253 | 0 R.FPGQLNADLR.K               |
| 253 - 262   | 1159.6115 | 1158.6043 | 1158.6219 | -0.0177 | 0 K.LAVNMVPFPR.L Oxidation (M) |

381 - 390 1245.5863 1244.5790 1244.5860 -0.0069 0 R.ISEQFTAMFR.R Oxidation (M)

No match to: 1410.6431, 1475.6616, 1800.8638, 2856.5326

465 T-complex protein 1 subunit epsilon

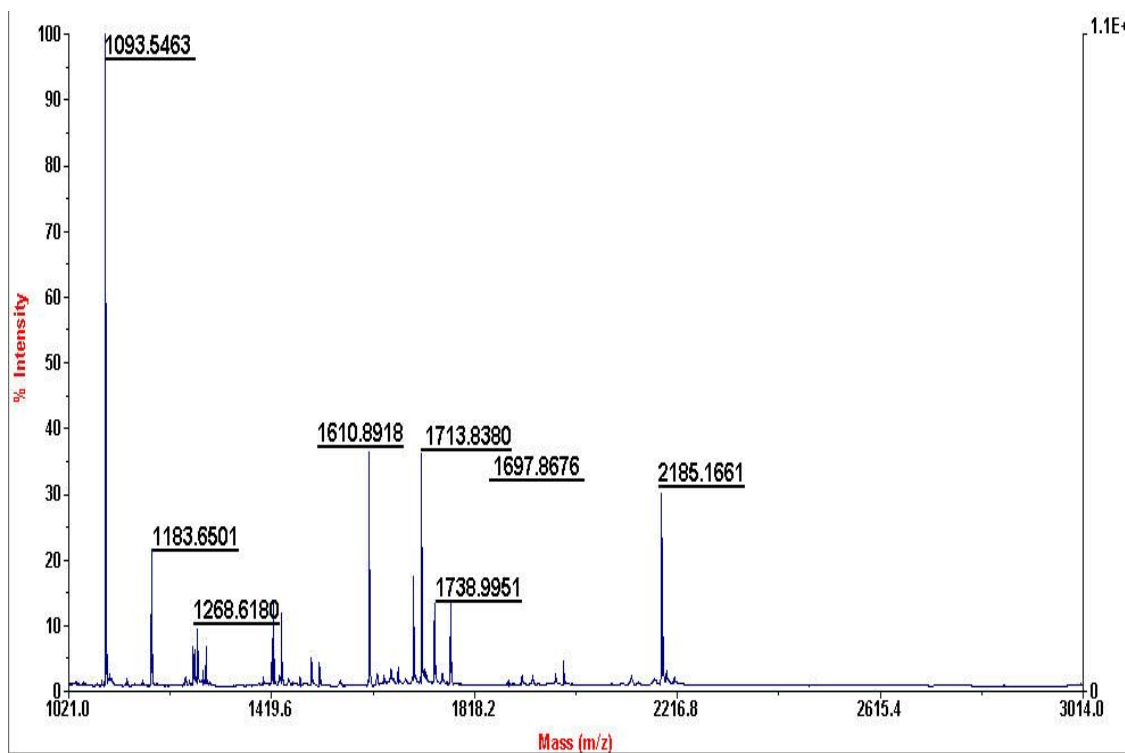

| Start - End | Observed  | Mr(expt)  | Mr(calc)  | Delta   | Miss Sequence                  |
|-------------|-----------|-----------|-----------|---------|--------------------------------|
| 133 - 142   | 1093.5463 | 1092.5390 | 1092.5200 | 0.0191  | 0 R.IADGYEQAAR.V               |
| 151 - 170   | 2185.1661 | 2184.1589 | 2184.1889 | -0.0300 | 1 K.ISDSVLVDIKDTEPLIQTA.T      |
| 227 - 241   | 1697.8676 | 1696.8603 | 1696.8607 | -0.0003 | 1 K.GVIVDKDFSHQMPK.K           |
| 227 - 241   | 1713.8380 | 1712.8307 | 1712.8556 | -0.0249 | 1 K.GVIVDKDFSHQMPK.K Oxidation |
| (M)         |           |           |           |         |                                |
| 248 - 261   | 1610.8918 | 1609.8846 | 1609.8902 | -0.0056 | 0 K.IAILTCPFEPKPK.T            |
| 324 - 340   | 1738.9951 | 1737.9879 | 1737.9414 | 0.0465  | 0 R.WVGGPEIELIAIATGGR.I        |
| 401 - 410   | 1183.6501 | 1182.6428 | 1182.6179 | 0.0249  | 0 R.SLHDALCVIR.N               |
| 440 - 449   | 1268.6180 | 1267.6107 | 1267.5689 | 0.0418  | 0 K.CPTLEQYAMR.A               |

No match to: 1770.9710, 2126.7558

466 Aldehyde dehydrogenase



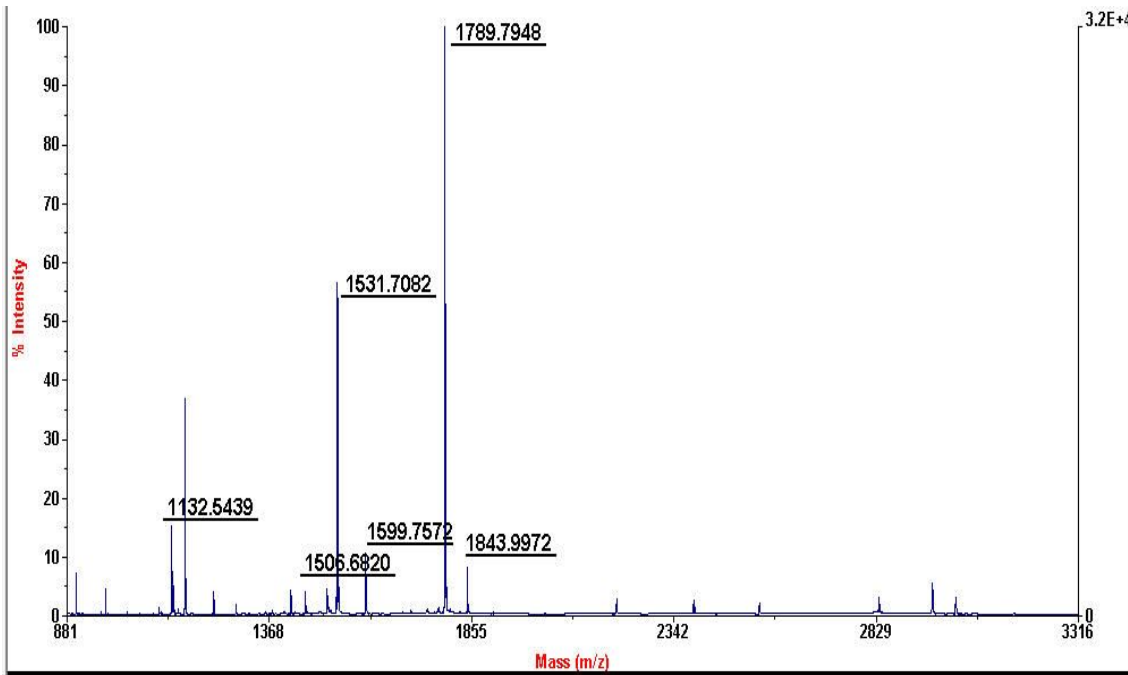

| Start - End | Observed  | Mr(expt)  | Mr(calc)  | Delta   | Miss Sequence           |
|-------------|-----------|-----------|-----------|---------|-------------------------|
| 85 - 94     | 1132.5439 | 1131.5366 | 1131.5825 | -0.0459 | 0 R.AAFQLGSPWR.R        |
| 160 - 172   | 1531.7082 | 1530.7009 | 1530.7355 | -0.0345 | 0 K.TIPIDGDFFSYTR.H     |
| 210 - 226   | 1843.9972 | 1842.9899 | 1843.0455 | -0.0555 | 0 K.VAEQTPLTALYVANLIK.E |
| 325 - 338   | 1789.7948 | 1788.7875 | 1788.8206 | -0.0332 | 0 R.TFVQEDIYDEFVER.S    |
| 356 - 368   | 1506.6820 | 1505.6748 | 1505.6998 | -0.0251 | 0 K.TEQGPQVDETQFK.K     |
| 493 - 506   | 1599.7572 | 1598.7499 | 1598.7828 | -0.0329 | 0 R.ELGEYGLQAYTEVK.T    |

No match to: 1164.5422, 2963.4603, 3809.8500

467 Heterogeneous nuclear ribonucleoprotein H

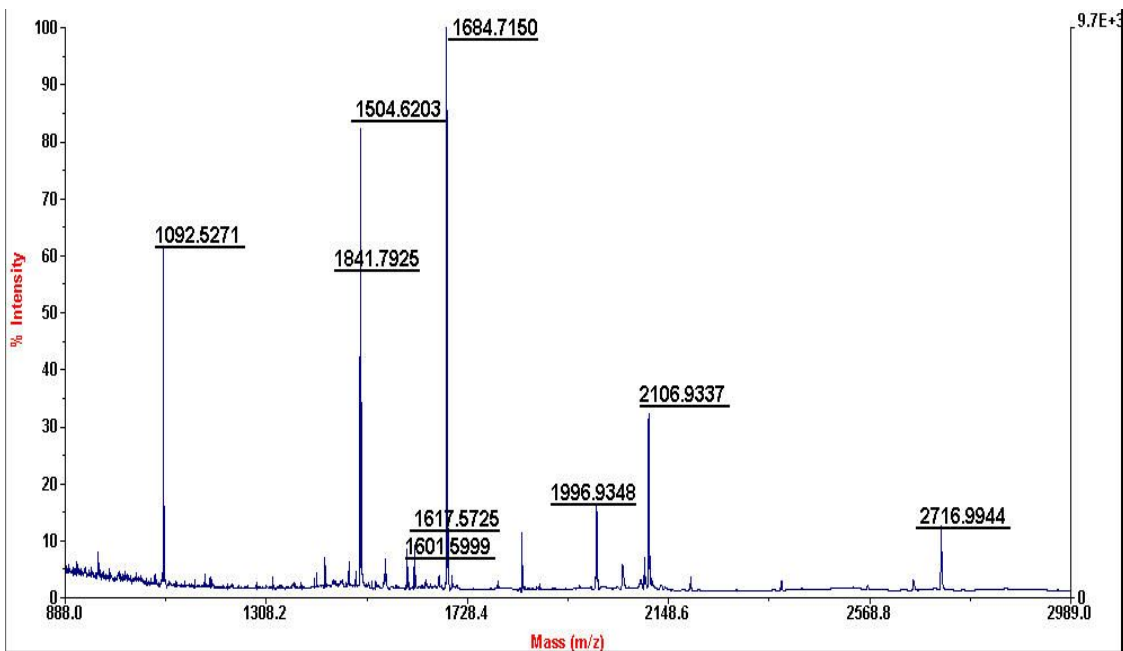

| Start - End                           | Observed  | Mr(expt)  | Mr(calc)  | Delta   | Miss Sequence                     |
|---------------------------------------|-----------|-----------|-----------|---------|-----------------------------------|
| 17 - 29                               | 1504.6203 | 1503.6130 | 1503.6776 | -0.0646 | 0 R.GLPWSCSADEVQR.F               |
| 50 - 68                               | 2106.9337 | 2105.9264 | 2105.9753 | -0.0489 | 0 R.EGRPSGEAFVELESEDEVK.L         |
| 99 - 114                              | 1684.7150 | 1683.7077 | 1683.7601 | -0.0524 | 0 K.HTGPNSPDTANDGFVR.L            |
| 151 - 167                             | 1841.7925 | 1840.7852 | 1840.8843 | -0.0991 | 0 R.STGEAFVQFASQEIAEK.A           |
| 234 - 259                             | 2716.9944 | 2715.9871 | 2716.0375 | -0.0504 | 0                                 |
| <b>R.GAYGGGYGGYDDYNGYNDGYGFGSDR.F</b> |           |           |           |         |                                   |
| 263 - 275                             | 1601.5999 | 1600.5926 | 1600.6399 | -0.0472 | 0 R.DLNYCFSGMSDHR.Y               |
| 263 - 275                             | 1617.5725 | 1616.5652 | 1616.6348 | -0.0695 | 0 R.DLNYCFSGMSDHR.Y Oxidation (M) |
| 300 - 316                             | 1996.9348 | 1995.9275 | 1995.9690 | -0.0415 | 0 R.ATENDIYNFFSPLNPVR.V           |
| 317 - 326                             | 1092.5271 | 1091.5198 | 1091.5724 | -0.0525 | 0 R.VHIEIGPDGR.V                  |

468 Heterogeneous nuclear ribonucleoprotein H2

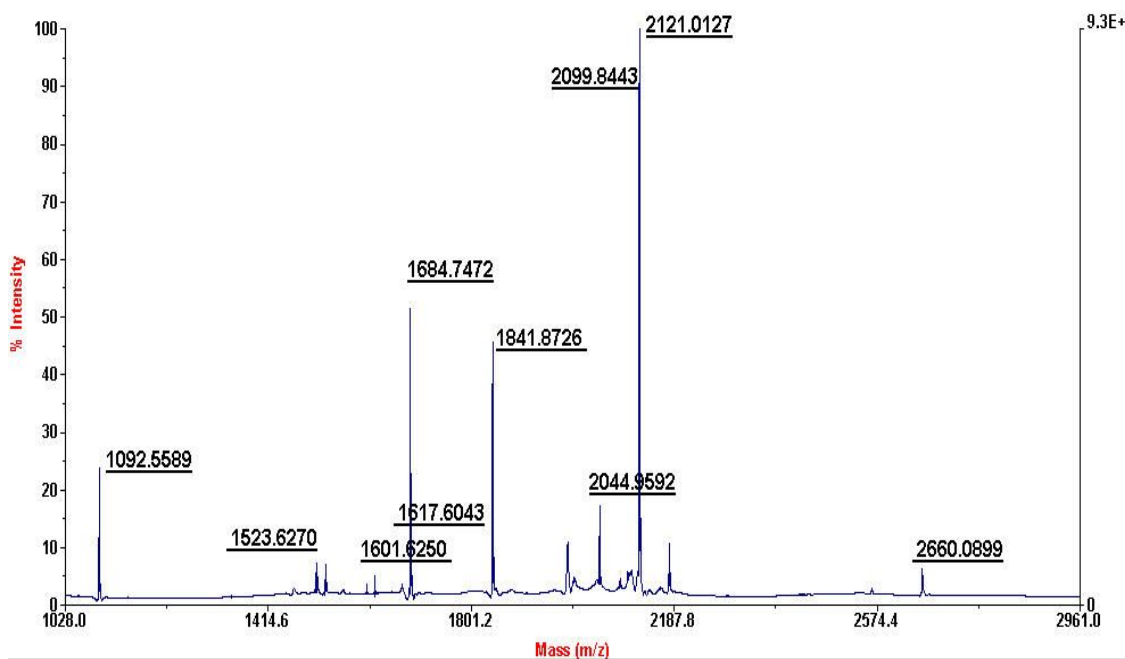

| Start - End | Observed  | Mr(expt)  | Mr(calc)  | Delta   | Miss Sequence                     |
|-------------|-----------|-----------|-----------|---------|-----------------------------------|
| 17 - 29     | 1523.6270 | 1522.6197 | 1522.6544 | -0.0347 | 0 R.GLPWSCSADEVMR.F Oxidation (M) |
| 50 - 68     | 2121.0127 | 2120.0054 | 2119.9909 | 0.0145  | 0 R.EGRPSGEAFVELESEEEVK.L         |
| 99 - 114    | 1684.7472 | 1683.7399 | 1683.7601 | -0.0202 | 0 K.HTGPNSPDTANDGFVR.L            |
| 151 - 167   | 1841.8726 | 1840.8654 | 1840.8843 | -0.0189 | 0 R.STGEAFVQFASQEIAEK.A           |
| 234 - 259   | 2660.0899 | 2659.0826 | 2659.0160 | 0.0666  | 0                                 |

**R.GAYGGGYGGYDDYGGYNDGYGFGSDR.F**

|           |           |           |           |         |   |                                 |
|-----------|-----------|-----------|-----------|---------|---|---------------------------------|
| 263 - 275 | 1601.6250 | 1600.6177 | 1600.6399 | -0.0221 | 0 | R.DLNYCFSGMSDHR.Y               |
| 263 - 275 | 1617.6043 | 1616.5971 | 1616.6348 | -0.0377 | 0 | R.DLNYCFSGMSDHR.Y Oxidation (M) |
| 276 - 294 | 2083.8725 | 2082.8652 | 2082.8636 | 0.0015  | 0 | R.YGDGGSSFQSTTGHCVHMR.G         |
| 276 - 294 | 2099.8443 | 2098.8370 | 2098.8586 | -0.0216 | 0 | R.YGDGGSSFQSTTGHCVHMR.G         |

Oxidation (M)

|           |           |           |           |        |   |                       |
|-----------|-----------|-----------|-----------|--------|---|-----------------------|
| 300 - 316 | 2044.9592 | 2043.9519 | 2043.9360 | 0.0159 | 0 | R.ATENDIYNFFSPLNPMR.V |
|-----------|-----------|-----------|-----------|--------|---|-----------------------|

Oxidation (M)

|           |           |           |           |         |   |                |
|-----------|-----------|-----------|-----------|---------|---|----------------|
| 317 - 326 | 1092.5589 | 1091.5516 | 1091.5724 | -0.0207 | 0 | R.VHIEIGPDGR.V |
|-----------|-----------|-----------|-----------|---------|---|----------------|

No match to: 1877.9535, 1997.0158, 2563.3415

469 Non-specific lipid-transfer protein

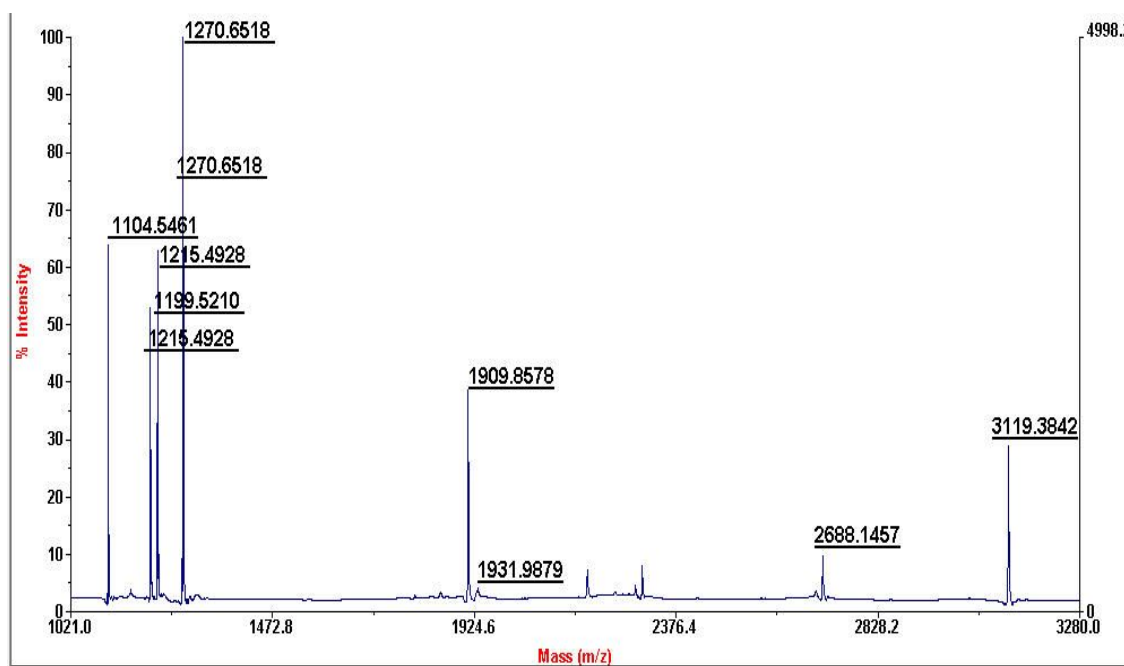

| Start - End                              | Observed  | Mr(expt)  | Mr(calc)  | Delta   | Miss Sequence             |
|------------------------------------------|-----------|-----------|-----------|---------|---------------------------|
| 24 - 33                                  | 1104.5461 | 1103.5388 | 1103.5723 | -0.0335 | 0 K.FVKPGAENSR.D          |
| 46 - 74                                  | 3119.3842 | 3118.3769 | 3118.4125 | -0.0355 | 0                         |
| <b>K.ALADAQIPYSAVDQACVGYVFGDSTCGQR.A</b> |           |           |           |         |                           |
| 106 - 123                                | 1931.9879 | 1930.9806 | 1931.0186 | -0.0380 | 0 R.QLIQGGVAECVLALGF EK.M |
| 151 - 168                                | 1909.8578 | 1908.8505 | 1908.9192 | -0.0688 | 0 K.YGLSAHPVAPQMFGYAGK.E  |

Oxidation (M)

|               |           |           |           |         |   |                               |
|---------------|-----------|-----------|-----------|---------|---|-------------------------------|
| 191 - 213     | 2688.1457 | 2687.1384 | 2687.1809 | -0.0425 | 0 | K.HSVNNPYSQFQDEYSLDEVMASK.E   |
| 191 - 213     | 2704.1134 | 2703.1061 | 2703.1759 | -0.0697 | 0 | K.HSVNNPYSQFQDEYSLDEVMASK.E   |
| Oxidation (M) |           |           |           |         |   |                               |
| 251 - 270     | 2299.9940 | 2298.9867 | 2299.0599 | -0.0732 | 0 | K.AVEILAQEMMTDLPSSFEEK.S 2    |
| Oxidation (M) |           |           |           |         |   |                               |
| 405 - 415     | 1199.5210 | 1198.5137 | 1198.5441 | -0.0304 | 0 | K.MGFPEAASSFR.T               |
| 405 - 415     | 1215.4928 | 1214.4855 | 1214.5390 | -0.0535 | 0 | K.MGFPEAASSFR.T Oxidation (M) |
| 512 - 522     | 1270.6518 | 1269.6445 | 1269.5812 | 0.0633  | 0 | K.MNPQSAFFQGK.L Oxidation (M) |

No match to: 1272.5919, 1849.0081, 1908.8087, 2176.8919

470 3-ketoacid-coenzyme A transferase 1

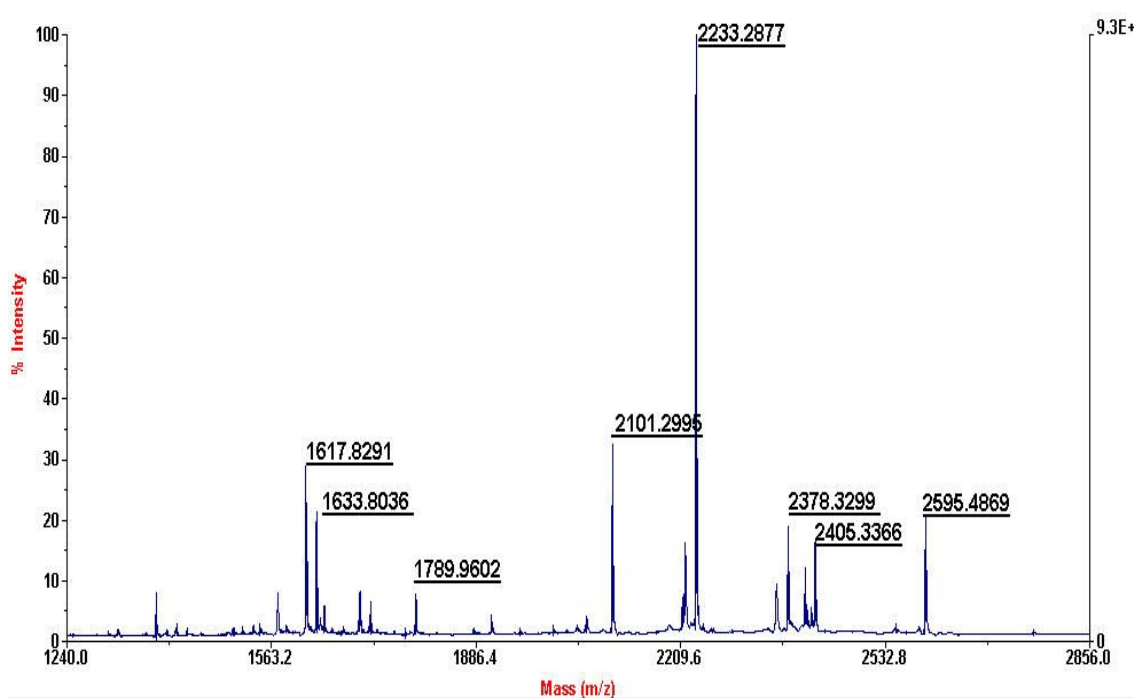

| Start - End | Observed  | Mr(expt)  | Mr(calc)  | Delta  | Miss Sequence                       |
|-------------|-----------|-----------|-----------|--------|-------------------------------------|
| 84 - 104    | 2101.2995 | 2100.2922 | 2100.1328 | 0.1595 | 0 K.GLTAVSNNAGVDNFGGLLLR.S          |
| 110 - 124   | 1789.9602 | 1788.9529 | 1788.8101 | 0.1428 | 1 K.RMVSSYVGENAEFER.Q Oxidation (M) |
| 111 - 124   | 1617.8291 | 1616.8219 | 1616.7141 | 0.1078 | 0 R.MVSSYVGENAEFER.Q                |
| 111 - 124   | 1633.8036 | 1632.7964 | 1632.7090 | 0.0874 | 0 R.MVSSYVGENAEFER.Q Oxidation (M)  |

125 - 144 2233.2877 2232.2804 2232.1274 0.1530 0 R.QYLSGELEVELTPQGTLAER.I  
 147 - 173 2595.4869 2594.4796 2594.3017 0.1779 0

R.AGGAGVPAFYTPTGYGTLVQEGGSPK.Y

191 - 211 2378.3299 2377.3226 2377.1954 0.1272 0 R.EFNGQHFILEEAITGDFALVK.A  
 369 - 390 2405.3366 2404.3293 2404.1621 0.1673 0 K.ETVTILPGASFFSSDESFAMIR.G  
 369 - 390 2421.3487 2420.3414 2420.1570 0.1845 0 K.ETVTILPGASFFSSDESFAMIR.G

Oxidation (M)

No match to: 1573.9493, 1702.0257, 2216.2279, 2362.2674

471 Aldehyde dehydrogenase X

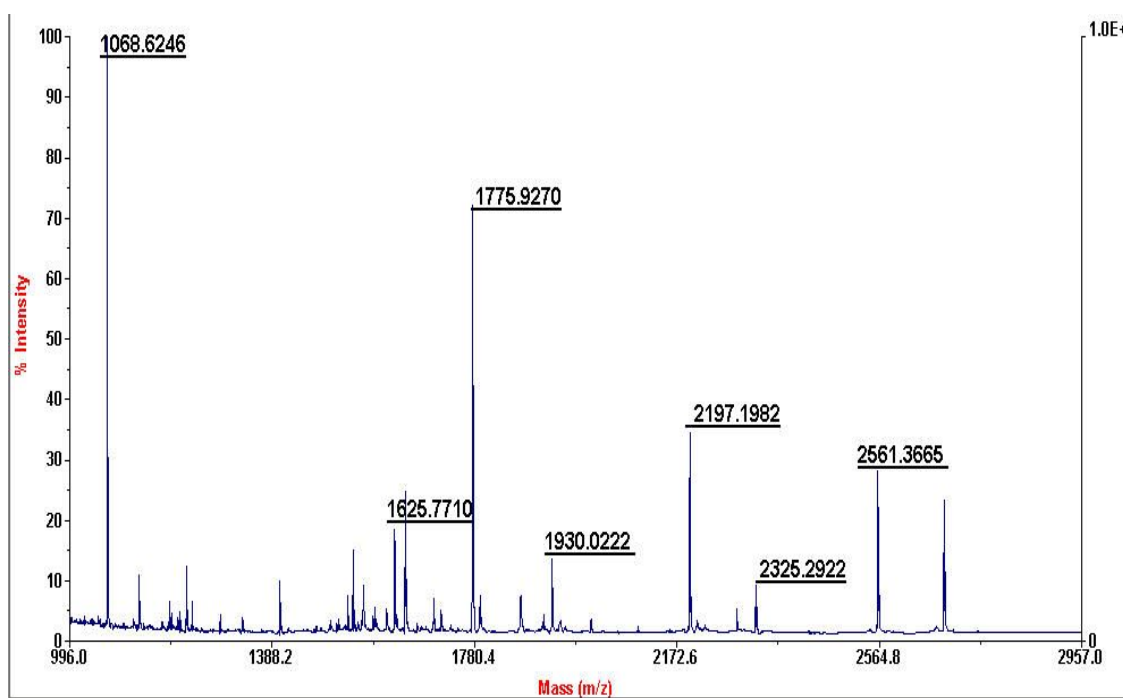

| Start - End | Observed  | Mr(expt)  | Mr(calc)  | Delta  | Miss Sequence                     |
|-------------|-----------|-----------|-----------|--------|-----------------------------------|
| 52 - 73     | 2325.2922 | 2324.2849 | 2324.1761 | 0.1088 | 1 K.KTFPTVNPTTGEVIGHVAEGDR.A      |
| 53 - 73     | 2197.1982 | 2196.1909 | 2196.0811 | 0.1098 | 0 K.TFPTVNPTTGEVIGHVAEGDR.A       |
| 148 - 155   | 957.4552  | 956.4479  | 956.4392  | 0.0087 | 0 R.YFAGWADK.W                    |
| 160 - 172   | 1625.7710 | 1624.7637 | 1624.7127 | 0.0511 | 0 K.TIPMDGQHFCFTR.H Oxidation (M) |
| 325 - 338   | 1775.9270 | 1774.9197 | 1774.8414 | 0.0784 | 0 R.TFVEESIYNEFLER.T              |
| 348 - 369   | 2561.3665 | 2560.3592 | 2560.2194 | 0.1398 | 1 K.VGNPFELDTQQGPQVDKEQFER.V      |

395 - 411 1930.0222 1929.0149 1928.9455 0.0694 0 R.GFFIKPTVFGGVQDDMR.I

Oxidation (M)

442 - 451 1068.6246 1067.6173 1067.5764 0.0409 0 R.YGLAAAVFTR.D

No match to: 1130.5873, 1544.8498, 1645.8777, 1870.0274, 2689.4880

472 D-3-phosphoglycerate dehydrogenase

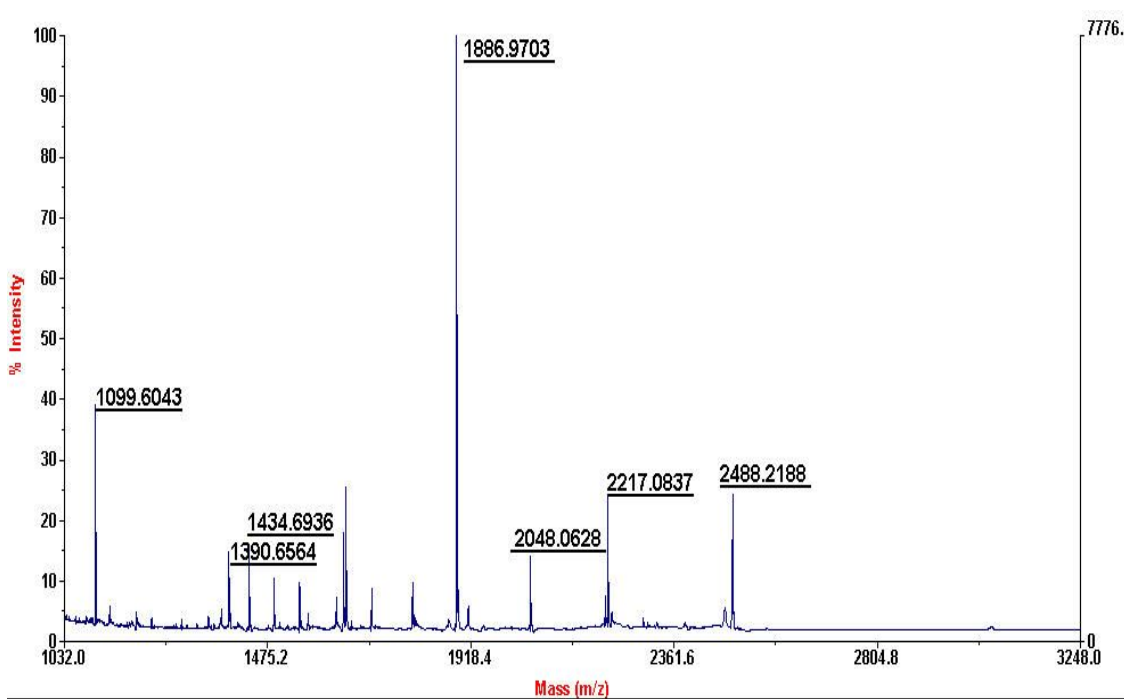

| Start - End | Observed  | Mr(expt)  | Mr(calc)  | Delta   | Miss Sequence                 |
|-------------|-----------|-----------|-----------|---------|-------------------------------|
| 9 - 20      | 1434.6936 | 1433.6864 | 1433.6643 | 0.0221  | 0 K.VLISDSLDPCCR.K            |
| 39 - 54     | 1886.9703 | 1885.9631 | 1885.9455 | 0.0176  | 0 K.EELIAELQDCEGLIVR.S        |
| 237 - 247   | 1099.6043 | 1098.5970 | 1098.6033 | -0.0063 | 0 R.GGIVDEGALLR.A             |
| 248 - 268   | 2217.0837 | 2216.0764 | 2216.0532 | 0.0232  | 0 R.ALQSGQCAGAALDVFTEEPPR.D   |
| 248 - 270   | 2488.2188 | 2487.2115 | 2487.1812 | 0.0303  | 1 R.ALQSGQCAGAALDVFTEEPPRDR.A |
| 271 - 289   | 2048.0628 | 2047.0556 | 2047.0157 | 0.0399  | 0 R.ALVDHENVISCPHLGASTK.E     |
| 462 - 469   | 986.5895  | 985.5822  | 985.5960  | -0.0138 | 0 R.DLPLLLFR.T                |
| 523 - 533   | 1390.6564 | 1389.6491 | 1389.6466 | 0.0025  | 0 K.QHVTEAFQFHF.-             |

No match to: 1544.7668, 1645.8181, 1700.7848, 2472.2010

473 Inosine-5'-monophosphate dehydrogenase 2

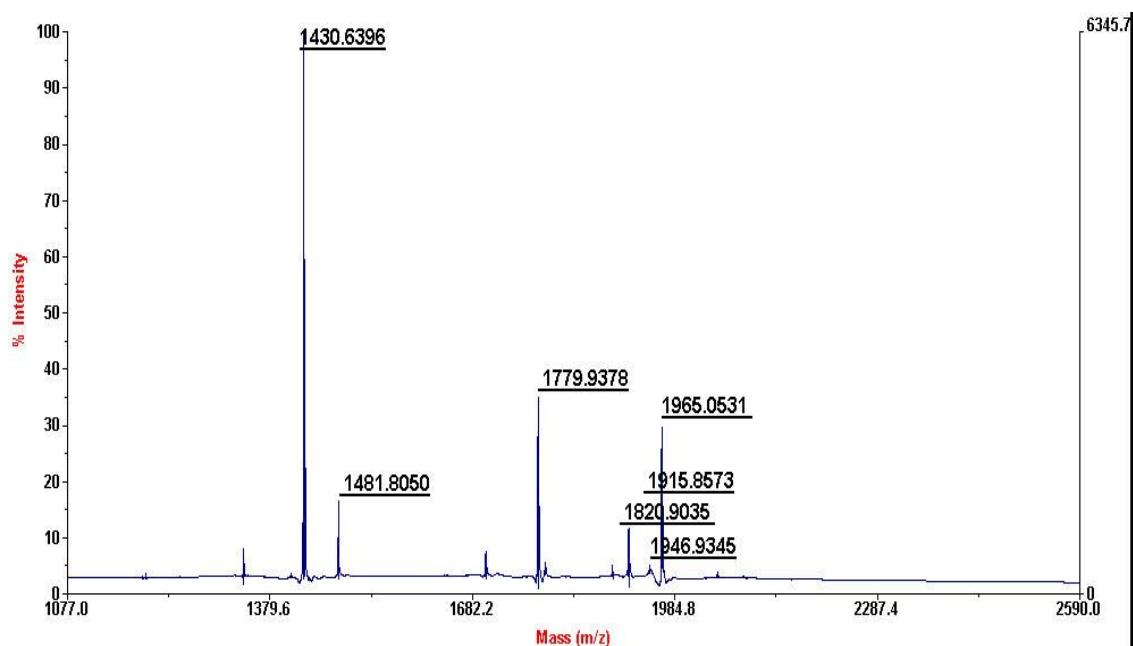

| Start - End | Observed  | Mr(expt)  | Mr(calc)  | Delta   | Miss Sequence             |
|-------------|-----------|-----------|-----------|---------|---------------------------|
| 109 - 124   | 1820.9035 | 1819.8962 | 1819.9720 | -0.0758 | 1 K.KYEQGFITDPVVLSPK.D    |
| 137 - 149   | 1430.6396 | 1429.6323 | 1429.6773 | -0.0449 | 0 R.HGFCGIPITDTGR.M       |
| 182 - 195   | 1481.8050 | 1480.7977 | 1480.8613 | -0.0636 | 1 K.REDLVVAPAGITLK.E      |
| 207 - 224   | 1965.0531 | 1964.0458 | 1964.0942 | -0.0484 | 1 K.GKLPIVNEDELVAIIAR.T   |
| 209 - 224   | 1779.9378 | 1778.9305 | 1778.9778 | -0.0473 | 0 K.LPIVNEDELVAIIAR.T     |
| 243 - 259   | 1946.9345 | 1945.9272 | 1945.9316 | -0.0044 | 1 K.QLLCGAAIGTHEDDKYR.L   |
| 356 - 375   | 2048.0988 | 2047.0915 | 2047.1327 | -0.0412 | 1 R.RFGVPVIADGGIQNVGHIK.A |
| 494 - 511   | 1915.8573 | 1914.8500 | 1914.9072 | -0.0571 | 0 R.TSSAQVEGGVHSLHSYK.R   |

No match to: 1339.6408, 1428.6835, 1701.8598

474 RuvB-like 1

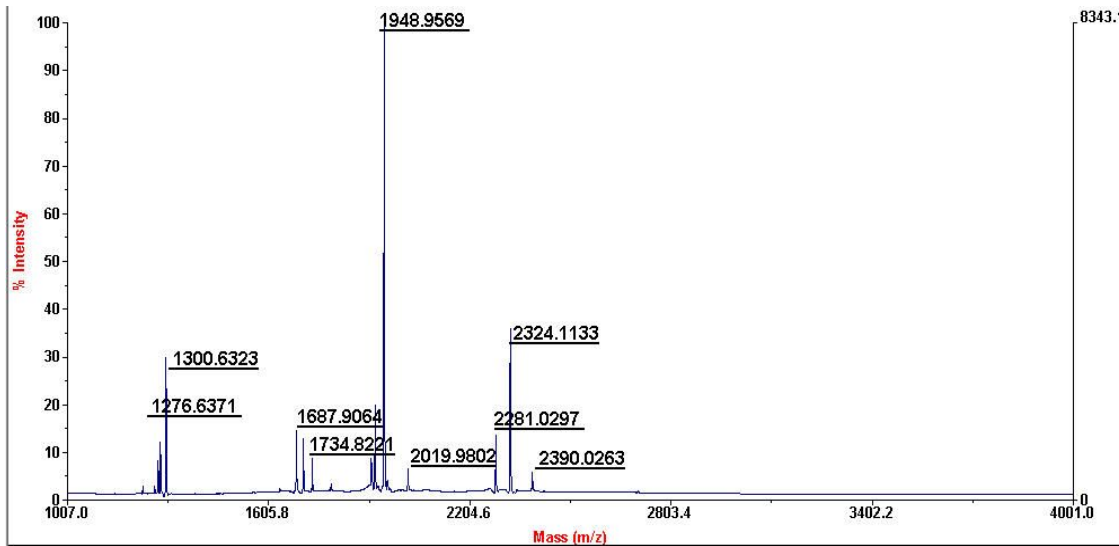

| Start - End | Observed  | Mr(expt)  | Mr(calc)  | Delta   | Miss Sequence                |
|-------------|-----------|-----------|-----------|---------|------------------------------|
| 34 - 46     | 1300.6323 | 1299.6250 | 1299.6531 | -0.0281 | 0 K.QAASGLVGQENAR.E          |
| 172 - 182   | 1276.6371 | 1275.6298 | 1275.6711 | -0.0412 | 0 K.LDPSIFESLQK.E            |
| 183 - 201   | 2019.9802 | 2018.9729 | 2019.0273 | -0.0543 | 1 K.ERVEAGDVIYIEANSGAVK.R    |
| 185 - 201   | 1734.8221 | 1733.8148 | 1733.8836 | -0.0688 | 0 R.VEAGDVIYIEANSGAVK.R      |
| 206 - 225   | 2390.0263 | 2389.0190 | 2389.0671 | -0.0481 | 0 R.CDTYATEFDLEAEEYVPLPK.G   |
| 318 - 333   | 1687.9064 | 1686.8992 | 1686.9304 | -0.0313 | 0 R.ALESSIPIVIFASNR.G        |
| 340 - 357   | 1948.9569 | 1947.9496 | 1947.9902 | -0.0406 | 0 R.GTEDITSPHGIPLDLLDR.V     |
| 379 - 400   | 2324.1133 | 2323.1061 | 2323.1655 | -0.0595 | 0 R.AQTEGINISEEALNHLGEIGTK.T |
| 423 - 441   | 2281.0297 | 2280.0224 | 2280.0797 | -0.0573 | 1 K.DSIEKEHVVEISELFYDAK.S    |
| 428 - 441   | 1708.7524 | 1707.7451 | 1707.7991 | -0.0540 | 0 K.EHVVEISELFYDAK.S         |

No match to: 1910.8881, 1921.9467

475 60S acidic ribosomal protein P2



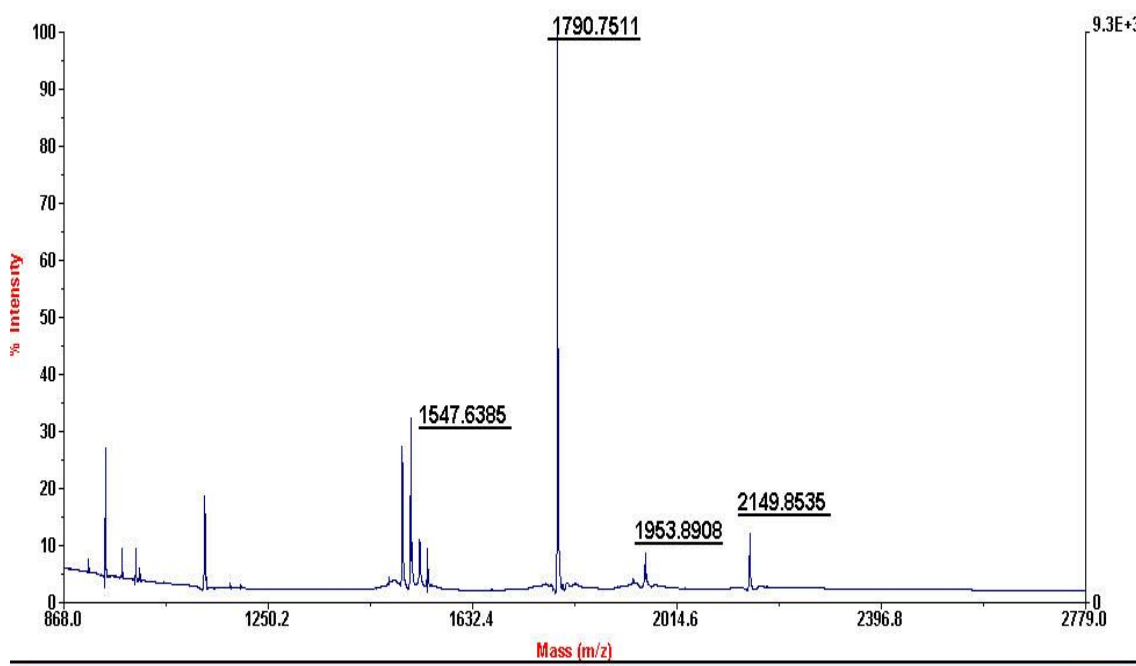

| Start - End                                 | Observed  | Mr(expt)  | Mr(calc)  | Delta   | Miss Sequence                              |
|---------------------------------------------|-----------|-----------|-----------|---------|--------------------------------------------|
| 1 - 17                                      | 1953.8908 | 1952.8835 | 1952.9409 | -0.0574 | 1 -.MMKYLAAYLLSTMSGNK.S 2 Oxidation (M)    |
| 2 - 17                                      | 1790.7511 | 1789.7438 | 1789.9106 | -0.1668 | 1 M.MKYLAAYLLSTMSGNK.S                     |
| 4 - 17                                      | 1547.6385 | 1546.6312 | 1546.7701 | -0.1389 | 0 K.YLAAYLLSTMSGNK.S Oxidation (M)         |
| 23 - 42                                     | 2149.8535 | 2148.8462 | 2148.9733 | -0.1271 | 0 K.DIEDVLGSGVGLDVEDMEDANK.V Oxidation (M) |
| No match to:1500.5941, 1516.6088, 1533.6389 |           |           |           |         |                                            |

476 Glutamine synthetase

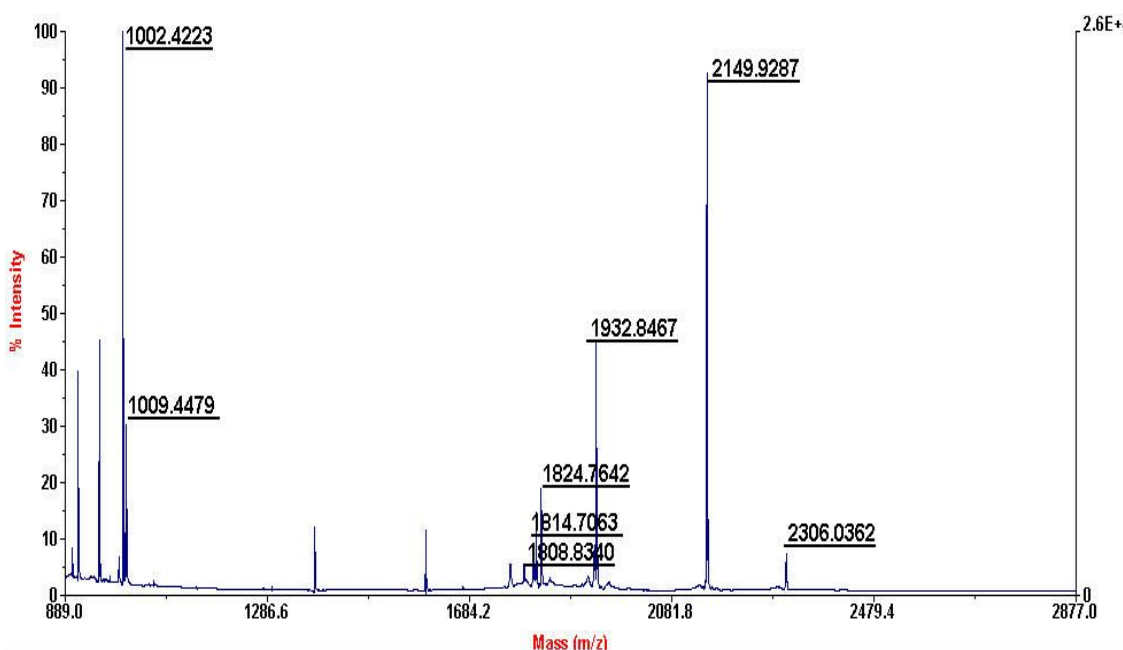

| Start - End | Observed  | Mr(expt)  | Mr(calc)  | Delta   | Miss Sequence                    |
|-------------|-----------|-----------|-----------|---------|----------------------------------|
| 26 - 41     | 1808.8340 | 1807.8268 | 1807.8927 | -0.0659 | 0 K.VQAMYIWIDGTGEGLR.C           |
| 26 - 41     | 1824.7642 | 1823.7569 | 1823.8876 | -0.1307 | 0 K.VQAMYIWIDGTGEGLR.C Oxidation |
| (M)         |           |           |           |         |                                  |
| 107 - 114   | 956.4437  | 955.4364  | 955.5199  | -0.0835 | 0 R.RPAETNLR.H                   |
| 174 - 181   | 1002.4223 | 1001.4150 | 1001.4930 | -0.0780 | 0 R.DIVEAHYR.A                   |
| 280 - 286   | 1009.4479 | 1008.4406 | 1008.5366 | -0.0960 | 1 K.RHQYHIR.A                    |
| 281 - 286   | 853.3805  | 852.3732  | 852.4355  | -0.0622 | 0 R.HQYHIR.A                     |
| 299 - 319   | 2306.0362 | 2305.0289 | 2305.1199 | -0.0910 | 1 R.RLTGFHETSNINDFSAGVANR.S      |
| 300 - 319   | 2149.9287 | 2148.9215 | 2149.0188 | -0.0974 | 0 R.LTGFHETSNINDFSAGVANR.S       |
| 334 - 340   | 914.3578  | 913.3505  | 913.4294  | -0.0788 | 1 K.KGYFEDR.R                    |
| 341 - 357   | 1932.8467 | 1931.8394 | 1931.9523 | -0.1129 | 0 R.RPSANCDPFSVTEALIR.T          |
| 358 - 372   | 1814.7063 | 1813.6990 | 1813.8193 | -0.1202 | 0 R.TCLLNETGDEPFQYK.N            |

No match to:865.3779, 1379.5995, 1597.6643

477 Ankyrin repeat domain-containing protein 13B

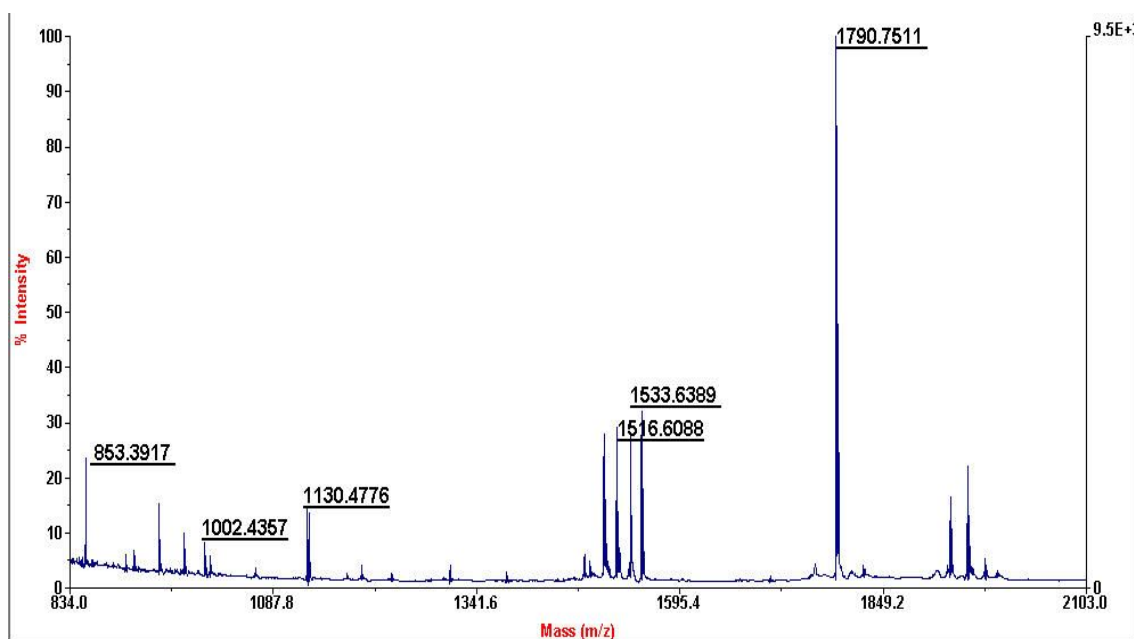

| Start - End | Observed  | Mr(expt)  | Mr(calc)  | Delta   | Miss Sequence                 |
|-------------|-----------|-----------|-----------|---------|-------------------------------|
| 16 - 28     | 1790.7511 | 1789.7438 | 1789.9277 | -0.1839 | 1 K.YPLHYLVWHNRHR.E           |
| 93 - 104    | 1516.6088 | 1515.6015 | 1515.8773 | -0.2758 | 1 R.DLELVQLVLR.YR.D           |
| 126 - 134   | 1130.4776 | 1129.4704 | 1129.5114 | -0.0410 | 0 K.AQDFYVEMK.W               |
| 488 - 496   | 1002.4357 | 1001.4284 | 1001.4059 | 0.0225  | 0 R.GYSMMGGQR.E Oxidation (M) |

552 - 559 853.3917 852.3844 852.4454 -0.0609 0 R.SAPPTPQR.Q  
 592 - 604 1533.6389 1532.6316 1532.7140 -0.0824 0 R.LAMELSAQEQEER.R

No match to:1500.5941, 1547.6385, 1953.8908

478 Tudor domain-containing protein 7

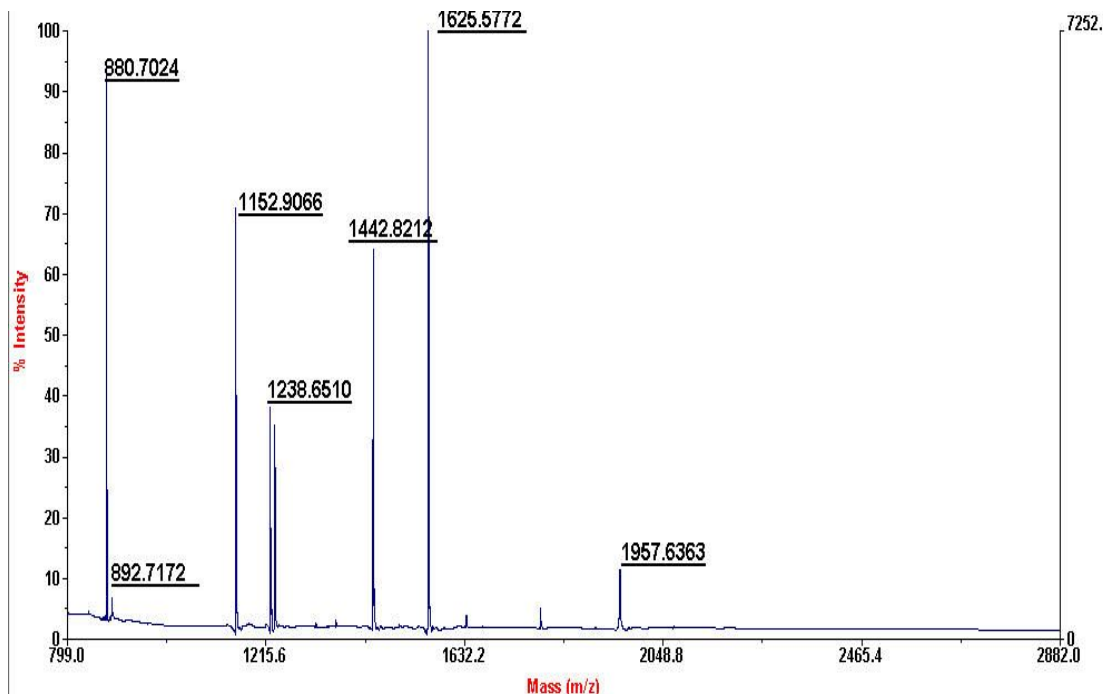

| Start - End | Observed  | Mr(expt)  | Mr(calc)  | Delta   | Miss Sequence             |
|-------------|-----------|-----------|-----------|---------|---------------------------|
| 125 - 136   | 1238.6510 | 1237.6438 | 1237.6091 | 0.0346  | 0 R.QPGFASNFSVGK.K        |
| 137 - 144   | 892.7172  | 891.7099  | 891.5290  | 0.1809  | 0 K.KPNPAPLR.D            |
| 406 - 415   | 1152.9066 | 1151.8993 | 1151.6914 | 0.2079  | 1 K.LPLPTDKIQK.D          |
| 658 - 674   | 1957.6363 | 1956.6290 | 1956.8744 | -0.2454 | 0 K.VTNICSDGTLYCQVPCK.G 2 |
| 864 - 878   | 1625.5772 | 1624.5699 | 1624.6722 | -0.1023 | 0 K.NGNMPMSGNTGENFR.K     |
| 997 - 1003  | 880.7024  | 879.6951  | 879.4926  | 0.2025  | 0 K.HELVNIR.K             |
| 1015 - 1028 | 1442.8212 | 1441.8139 | 1441.8293 | -0.0154 | 0 K.LPFQAVTAQLAGVK.C      |

No match to: 1224.9746, 1556.2144

479 aminopeptidase

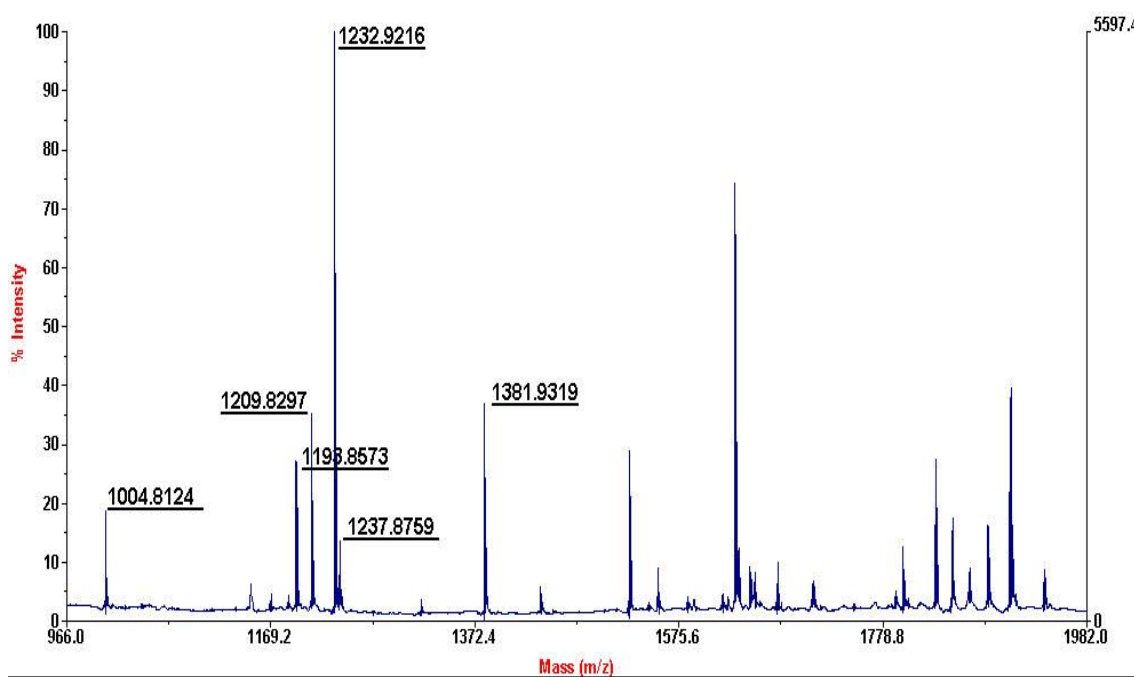

| Start - End | Observed  | Mr(expt)  | Mr(calc)  | Delta  | Miss Sequence                 |
|-------------|-----------|-----------|-----------|--------|-------------------------------|
| 177 - 188   | 1381.9319 | 1380.9246 | 1380.6310 | 0.2936 | 0 K.LYSGDQEAWQK.G             |
| 189 - 200   | 1232.9216 | 1231.9144 | 1231.6673 | 0.2471 | 0 K.GVLFASGQNLAR.Q            |
| 215 - 221   | 849.6457  | 848.6384  | 848.4643  | 0.1741 | 0 R.FAEIIEK.N                 |
| 268 - 282   | 1526.0918 | 1525.0845 | 1524.7936 | 0.2909 | 0 K.GSPNANEPLVFGK.G           |
| 418 - 428   | 1237.8759 | 1236.8687 | 1236.5986 | 0.2700 | 0 K.LFEASIIETGDR.V            |
| 432 - 440   | 1193.8573 | 1192.8501 | 1192.5699 | 0.2802 | 0 R.MPLFEHYTR.Q               |
| 432 - 440   | 1209.8297 | 1208.8224 | 1208.5648 | 0.2576 | 0 R.MPLFEHYTR.Q Oxidation (M) |
| 506 - 513   | 1004.8124 | 1003.8052 | 1003.6066 | 0.1986 | 0 R.TLIEFLLR.F                |

No match to: 1631.1433, 1831.2621, 1847.3574, 1883.3356, 1905.3339, 2056.3686, 2096.4867, 2224.6262, 3792.6709

480 Fascin

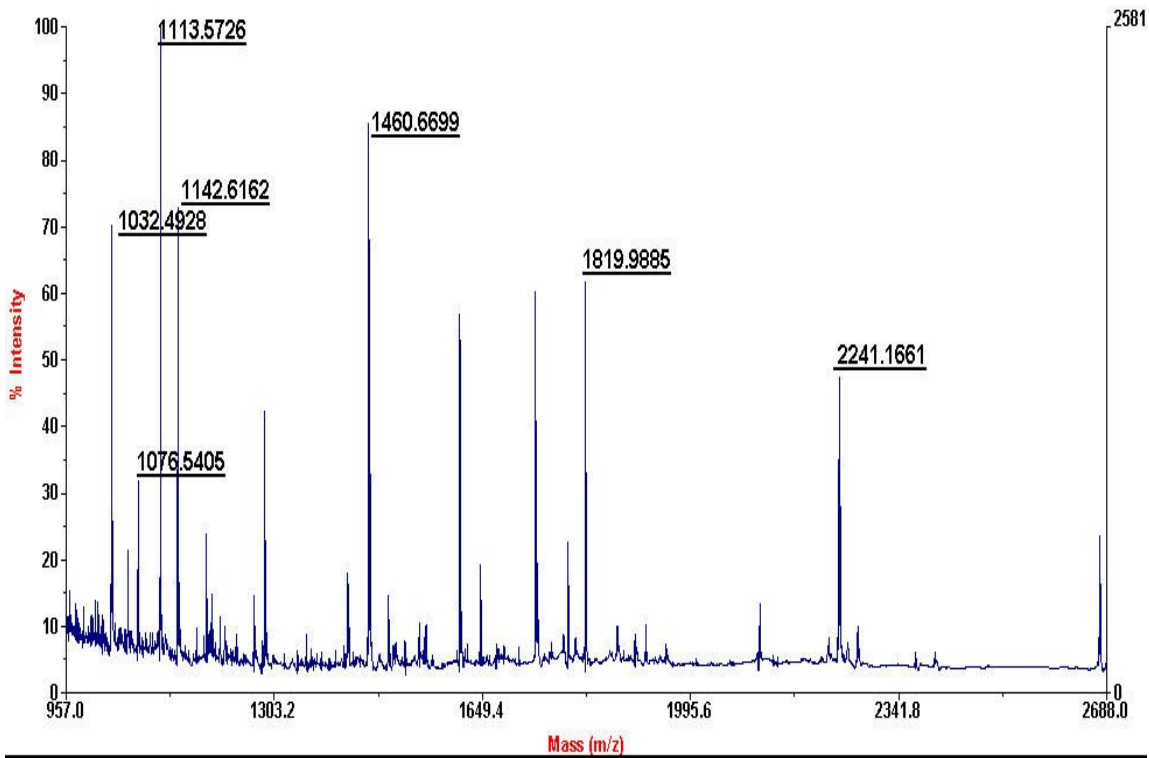

| Start - End | Observed  | Mr(expt)  | Mr(calc)  | Delta  | Miss Sequence              |
|-------------|-----------|-----------|-----------|--------|----------------------------|
| 44 - 63     | 2241.1661 | 2240.1588 | 2240.0896 | 0.0692 | 0 K.QIWTLEQPPDEAGSAAVCLR.S |
| 69 - 82     | 1611.8094 | 1610.8021 | 1610.7359 | 0.0663 | 1 R.YLAADKDGNTVCER.E       |
| 91 - 100    | 1142.6162 | 1141.6089 | 1141.5880 | 0.0209 | 0 R.FLIVAHDDGR.W           |
| 101 - 109   | 1113.5726 | 1112.5654 | 1112.5363 | 0.0291 | 0 R.WSLQSEAGR.R            |
| 111 - 118   | 944.4434  | 943.4361  | 943.4036  | 0.0326 | 0 R.YFGGTEDR.L             |
| 186 - 194   | 1076.5405 | 1075.5332 | 1075.5047 | 0.0286 | 0 R.YSVQTADHR.F            |
| 202 - 217   | 1819.9885 | 1818.9813 | 1818.9628 | 0.0184 | 0 R.LVARPEPATGYTLFR.S      |
| 331 - 341   | 1460.6699 | 1459.6626 | 1459.6190 | 0.0436 | 0 K.NASCYFDIEWR.D          |
| 390 - 398   | 1032.4928 | 1031.4856 | 1031.4607 | 0.0249 | 0 R.GEHGFIGCR.K            |

No match to: 817.4428, 1287.6955, 1737.9261

481 Annexin A11

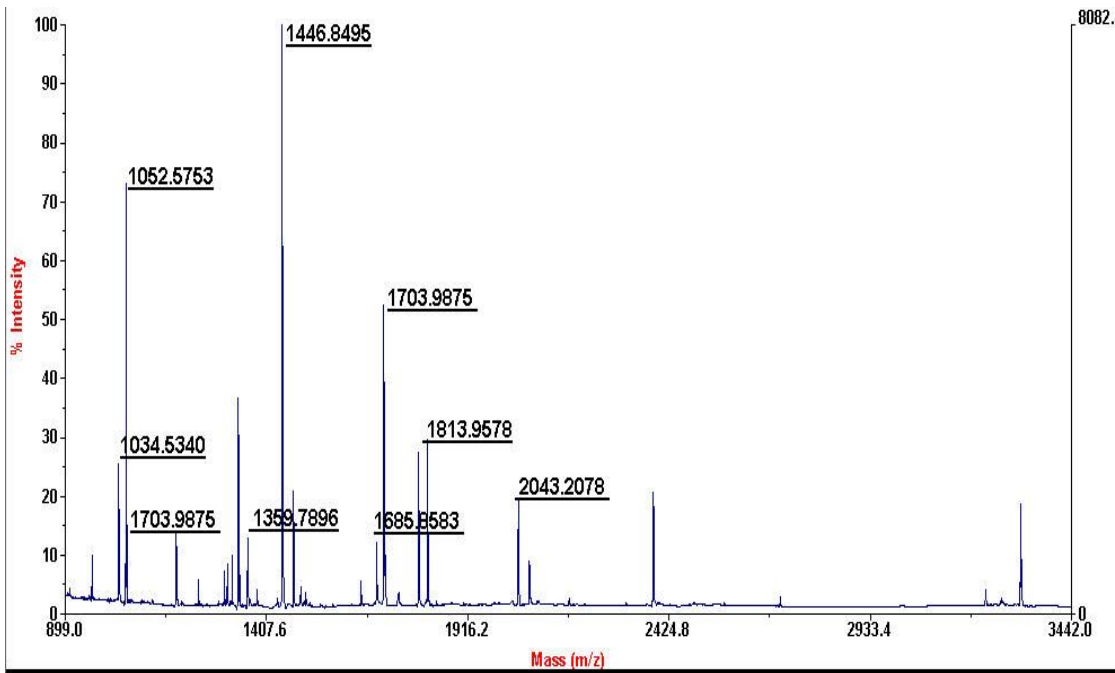

| Start - End | Observed  | Mr(expt)  | Mr(calc)  | Delta  | Miss Sequence             |
|-------------|-----------|-----------|-----------|--------|---------------------------|
| 192 - 204   | 1359.7896 | 1358.7823 | 1358.6830 | 0.0993 | 0 R.GTITDAPGFDPLR.D       |
| 192 - 210   | 2043.2078 | 2042.2005 | 2042.0433 | 0.1572 | 1 R.GTITDAPGFDPLRDAEVLR.K |
| 287 - 302   | 1703.9875 | 1702.9802 | 1702.8560 | 0.1242 | 0 K.GVGTDEACLIEILASR.S    |
| 328 - 336   | 1034.5340 | 1033.5267 | 1033.4577 | 0.0690 | 0 R.SDTSGHFQR.L           |
| 360 - 371   | 1336.7073 | 1335.7001 | 1335.6055 | 0.0946 | 0 R.DAQELYAAGENR.L        |
| 389 - 400   | 1446.8495 | 1445.8422 | 1445.7415 | 0.1007 | 0 R.AHLVAVFNEYQR.M        |
| 431 - 439   | 1052.5753 | 1051.5680 | 1051.5087 | 0.0594 | 0 K.NTPAFFAER.L           |
| 480 - 494   | 1685.8583 | 1684.8510 | 1684.7329 | 0.1181 | 0 K.SLYHDISGDTSGDYR.K     |
| 480 - 495   | 1813.9578 | 1812.9505 | 1812.8278 | 0.1227 | 1 K.SLYHDISGDTSGDYRK.I    |

No match to: 1475.8669, 2072.0410, 2384.1736, 3312.6326

482 Alpha-aminoadipic semialdehyde dehydrogenase

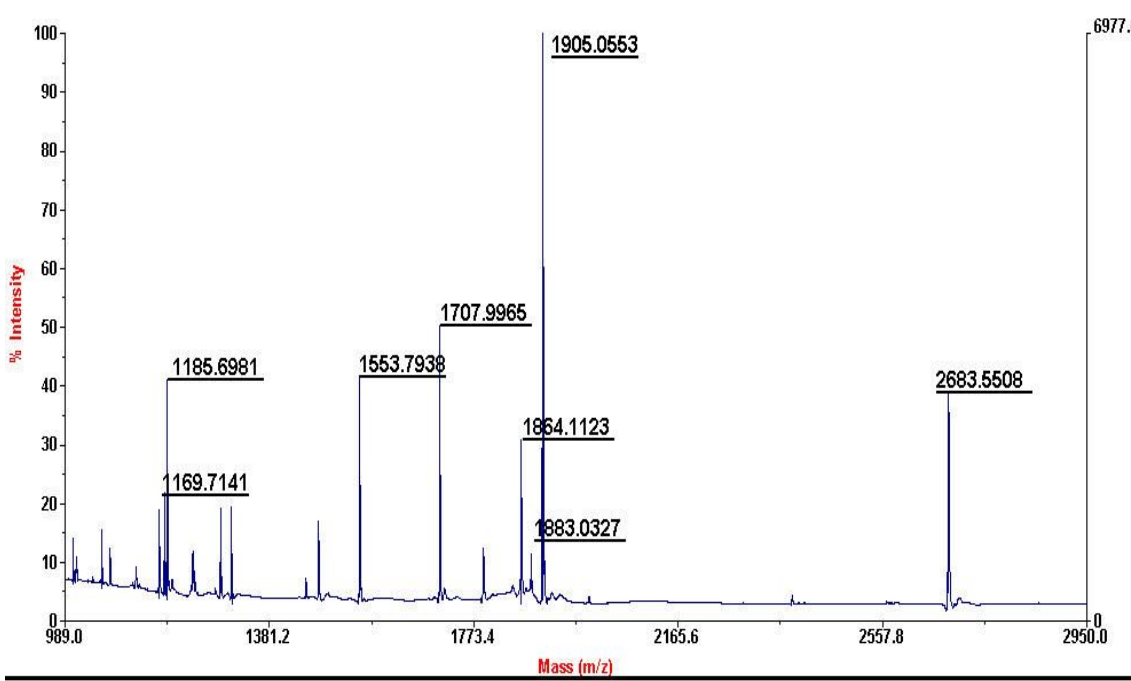

| Start - End                         | Observed  | Mr(expt)  | Mr(calc)  | Delta  | Miss Sequence           |
|-------------------------------------|-----------|-----------|-----------|--------|-------------------------|
| 7 - 17                              | 1185.6981 | 1184.6908 | 1184.6336 | 0.0572 | 1 R.ALCVHAAKTSK.L       |
| 49 - 62                             | 1553.7938 | 1552.7865 | 1552.6542 | 0.1323 | 0 R.EENEGVYNGSWGGR.G    |
| 63 - 79                             | 1905.0553 | 1904.0480 | 1903.9098 | 0.1382 | 0 R.GEVITTYCPANNEPIAR.V |
| 139 - 162                           | 2683.5508 | 2682.5435 | 2682.3211 | 0.2225 | 0                       |
| <b>K.ILVEGVGEVQEYVDICDYAVGLSR.M</b> |           |           |           |        |                         |
| 163 - 173                           | 1169.7141 | 1168.7068 | 1168.6274 | 0.0794 | 0 R.MIGGPILPSER.S       |
| 335 - 349                           | 1864.1123 | 1863.1050 | 1862.9751 | 0.1299 | 1 R.RLFIHESIHDEVVNR.L   |
| 336 - 349                           | 1707.9965 | 1706.9893 | 1706.8740 | 0.1152 | 0 R.LFIHESIHDEVVNR.L    |
| 352 - 358                           | 849.5574  | 848.5501  | 848.4868  | 0.0633 | 1 K.KAYAQIR.V           |
| 438 - 452                           | 1883.0327 | 1882.0254 | 1881.8897 | 0.1357 | 1 K.FKNEEEVFAWNNEVK.Q   |

No match to: 1287.7586, 1307.8220, 1475.8734

483 Y-box-binding protein 2

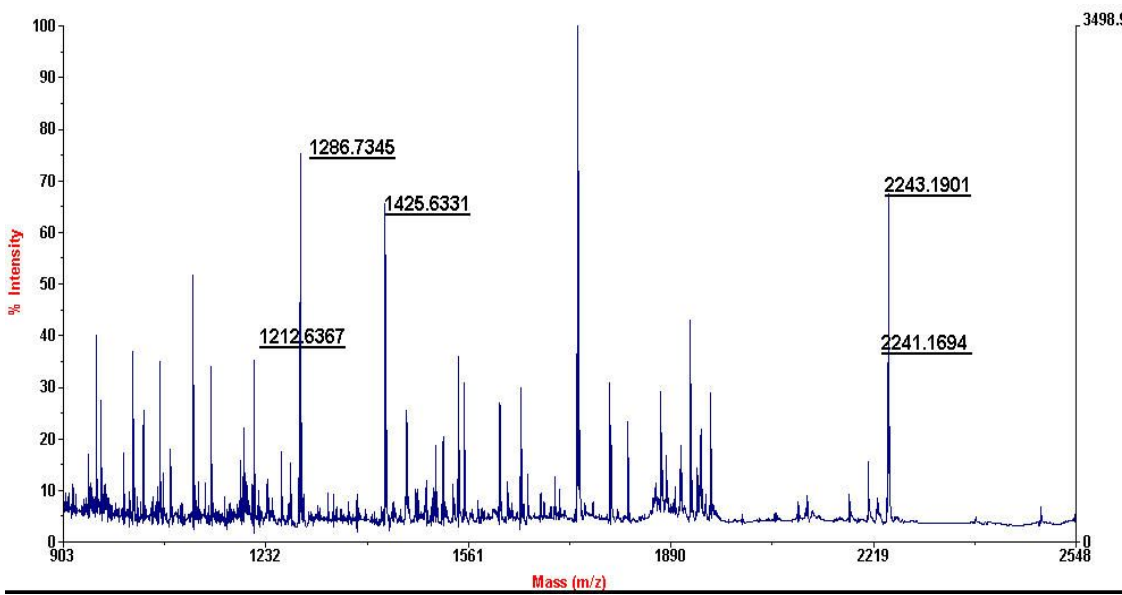

| Start - End | Observed  | Mr(expt)  | Mr(calc)  | Delta   | Miss Sequence              |
|-------------|-----------|-----------|-----------|---------|----------------------------|
| 117 - 127   | 1286.7345 | 1285.7272 | 1285.6667 | 0.0605  | 0 K.EDVVFVHQTAIK.R         |
| 223 - 231   | 1212.6367 | 1211.6295 | 1211.5586 | 0.0708  | 0 R.WCPPPFYR.R             |
| 223 - 232   | 1425.6331 | 1424.6259 | 1424.6812 | -0.0553 | 1 R.WCPPPFYRR.R            |
| 237 - 256   | 2243.1901 | 2242.1829 | 2242.1454 | 0.0374  | 1 R.GPRPPNQQPIEGTDRVEPK.E  |
| 257 - 276   | 2241.1694 | 2240.1621 | 2240.0934 | 0.0687  | 1 K.ETAPLEGHQQQGDERVPPPR.F |

No match to: 1059.5374, 1113.5494, 1460.6711, 1553.7533, 1645.8205, 1737.8977, 1920.9431

484 Dihydrolipoyl dehydrogenase

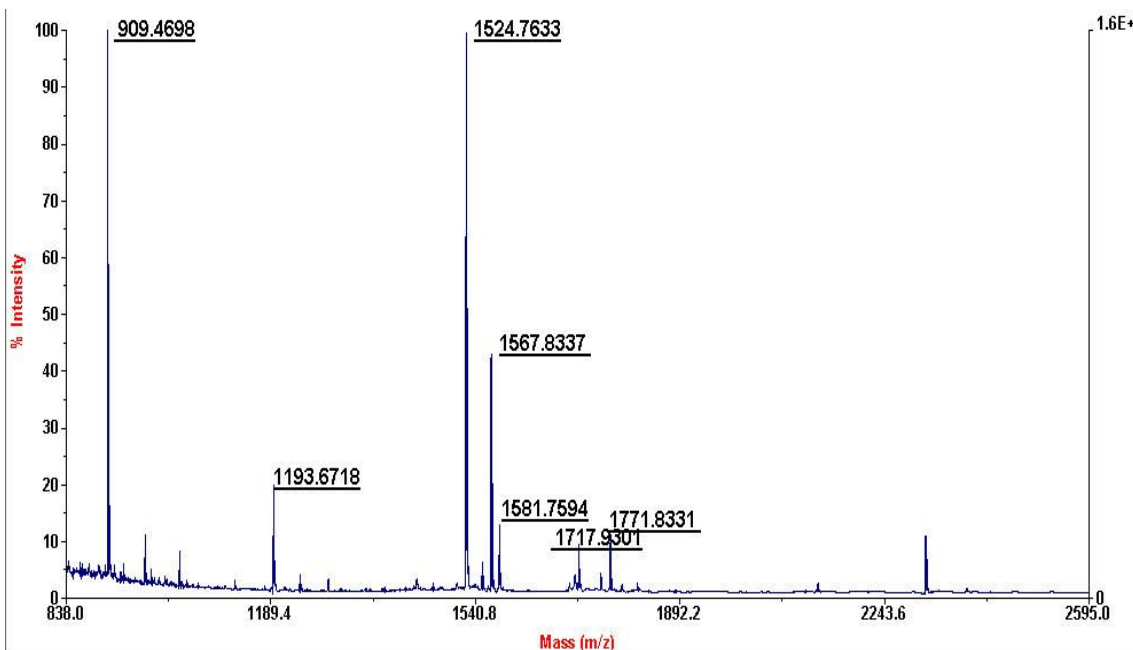



| Start - End | Observed  | Mr(expt)  | Mr(calc)  | Delta   | Miss Sequence                  |
|-------------|-----------|-----------|-----------|---------|--------------------------------|
| 90 - 104    | 1771.8331 | 1770.8258 | 1770.8260 | -0.0002 | 0 K.ALLNNSHYHMAHGK.D Oxidation |
| (M)         |           |           |           |         |                                |
| 301 - 315   | 1717.9301 | 1716.9229 | 1716.8903 | 0.0326  | 0 K.AEVITCDVLLVCIGR.R 2        |
| 321 - 334   | 1567.8337 | 1566.8264 | 1566.8253 | 0.0011  | 0 K.NLGLEELGIELDPR.G           |
| 405 - 417   | 1581.7594 | 1580.7521 | 1580.7569 | -0.0048 | 1 K.SEEQLKEEGIEYK.V            |
| 418 - 428   | 1193.6718 | 1192.6646 | 1192.6353 | 0.0293  | 1 K.VGKFPFAANSR.A              |
| 421 - 428   | 909.4698  | 908.4625  | 908.4504  | 0.0121  | 0 K.FPFAANSR.A                 |
| 483 - 495   | 1524.7633 | 1523.7560 | 1523.7303 | 0.0257  | 0 R.VCHAHTLSEAFR.E             |

No match to: 973.5048, 2314.1941

485 Delta-1-pyrroline-5-carboxylate dehydrogenase

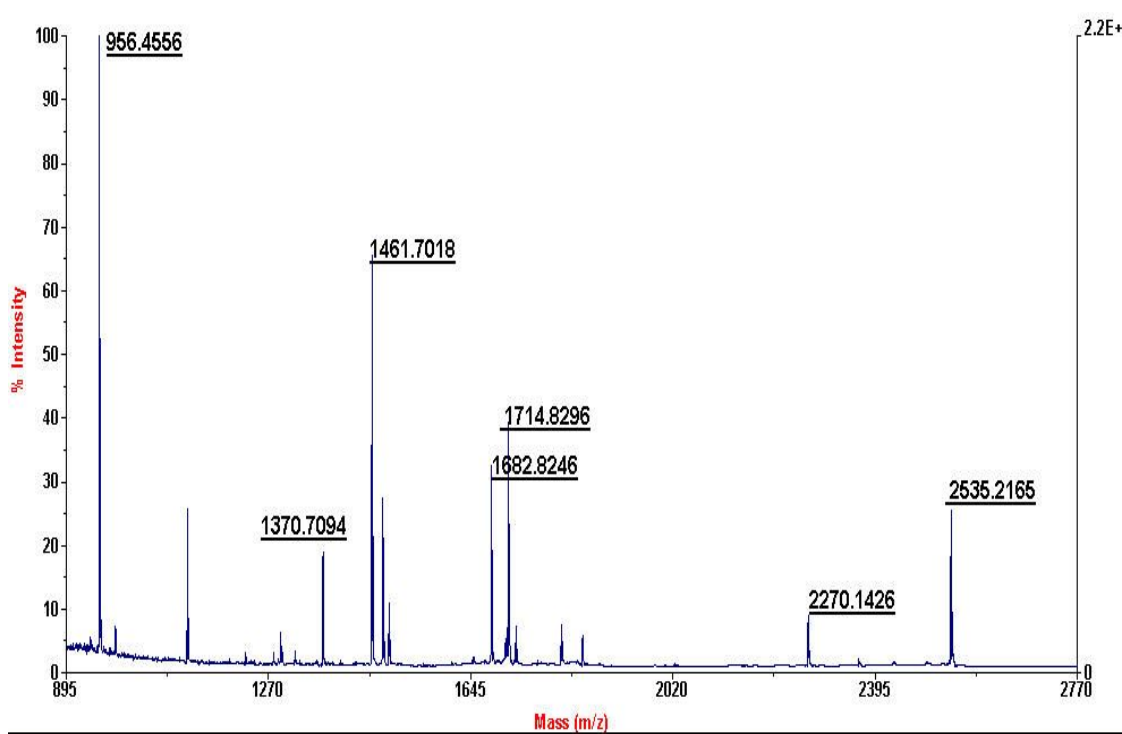

| Start - End | Observed  | Mr(expt)  | Mr(calc)  | Delta   | Miss Sequence                |
|-------------|-----------|-----------|-----------|---------|------------------------------|
| 32 - 47     | 1714.8296 | 1713.8223 | 1713.8686 | -0.0463 | 0 K.VANEPVLAFTQGSPER.D       |
| 32 - 52     | 2270.1426 | 2269.1353 | 2269.1702 | -0.0349 | 1 K.VANEPVLAFTQGSPERDALQK.A  |
| 114 - 124   | 1370.7094 | 1369.7021 | 1369.7354 | -0.0333 | 1 R.KEWDLKPIADR.A            |
| 176 - 198   | 2535.2165 | 2534.2093 | 2534.2653 | -0.0560 | 0 K.YAVELEGQPISVPPSTNSTVYR.G |
| 305 - 310   | 804.3882  | 803.3809  | 803.4079  | -0.0269 | 0 R.FHTFPR.L                 |

|           |           |           |           |         |   |                     |
|-----------|-----------|-----------|-----------|---------|---|---------------------|
| 319 - 325 | 956.4556  | 955.4484  | 955.4777  | -0.0293 | 0 | K.NFHVHR.S          |
| 403 - 408 | 811.3959  | 810.3886  | 810.4137  | -0.0251 | 0 | K.WLEHAR.S          |
| 510 - 524 | 1461.7018 | 1460.6945 | 1460.7372 | -0.0427 | 0 | K.STGSIVGQQPFGGAR.A |
| 525 - 540 | 1682.8246 | 1681.8173 | 1681.8536 | -0.0363 | 0 | R.ASGTNDKPGPHYLR.W  |

No match to: 1119.5353, 1481.7066, 1493.6728

#### 486 Glutamate dehydrogenase 1

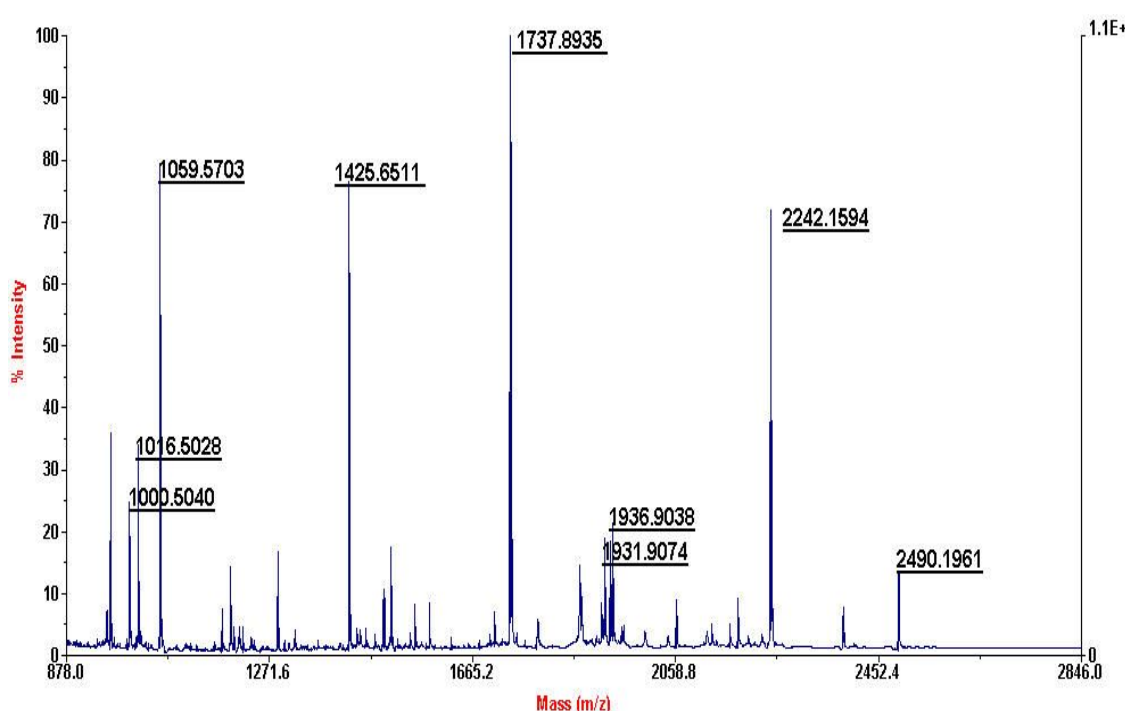

| Start - End          | Observed  | Mr(expt)  | Mr(calc)  | Delta   | Miss Sequence                |
|----------------------|-----------|-----------|-----------|---------|------------------------------|
| 69 - 76              | 1000.5040 | 999.4968  | 999.4484  | 0.0483  | 0 K.MVEGFFDR.G               |
| 69 - 76              | 1016.5028 | 1015.4955 | 1015.4433 | 0.0522  | 0 K.MVEGFFDR.G Oxidation (M) |
| 125 - 136            | 1425.6511 | 1424.6439 | 1424.6208 | 0.0230  | 0 R.DDGSWEVIEGYR.A           |
| 137 - 143            | 863.4567  | 862.4494  | 862.4158  | 0.0336  | 0 R.AQHSQHR.T                |
| 213 - 231            | 1931.9074 | 1930.9001 | 1930.9095 | -0.0094 | 0 K.GFIGPGIDVPAPDMSTGER.E    |
| <b>Oxidation (M)</b> |           |           |           |         |                              |
| 364 - 386            | 2490.1961 | 2489.1889 | 2489.2359 | -0.0470 | 0 K.AKPYESGILEADCILIPAASEK.Q |
| 400 - 420            | 2242.1594 | 2241.1521 | 2241.1641 | -0.0120 | 1 K.IAEGANGPTTPEADKIFLER.N   |
| 445 - 453            | 1059.5703 | 1058.5630 | 1058.5257 | 0.0373  | 0 K.NLNHVSYGR.L              |
| 461 - 476            | 1920.9126 | 1919.9053 | 1919.9047 | 0.0007  | 0 R.DSNYHLLMSVQESLER.K       |

|           |           |           |           |         |   |                      |           |
|-----------|-----------|-----------|-----------|---------|---|----------------------|-----------|
| 461 - 476 | 1936.9038 | 1935.8965 | 1935.8996 | -0.0031 | 0 | R.DSNYHLLMSVQESLER.K | Oxidation |
| (M)       |           |           |           |         |   |                      |           |
| 481 - 496 | 1737.8935 | 1736.8862 | 1736.8846 | 0.0016  | 0 | K.HGGTIPIVPTAEFQDR.I |           |
| 528 - 535 | 963.5728  | 962.5655  | 962.5185  | 0.0470  | 0 | K.YNLGLDLR.T         |           |

No match to: 1286.7326, 1739.8467

487 UPF0027 protein C22orf28

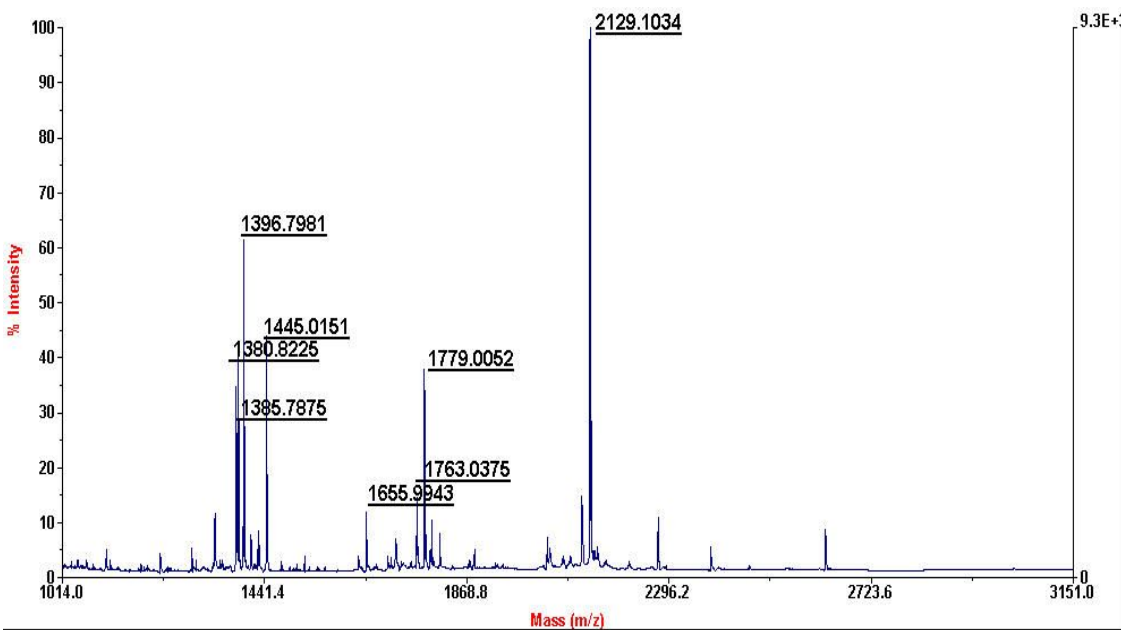

| Start - End   | Observed  | Mr(expt)  | Mr(calc)  | Delta  | Miss | Sequence              |               |
|---------------|-----------|-----------|-----------|--------|------|-----------------------|---------------|
| 4 - 14        | 1385.7875 | 1384.7802 | 1384.6510 | 0.1292 | 0    | R.SYNDELQFLEK.I       |               |
| 45 - 51       | 953.5766  | 952.5693  | 952.4688  | 0.1005 | 0    | K.LMFEELR.N           | Oxidation (M) |
| 68 - 81       | 1445.0151 | 1444.0079 | 1443.8310 | 0.1768 | 0    | K.QIGNVAALPGIVHR.S    |               |
| 167 - 181     | 1763.0375 | 1762.0302 | 1761.8243 | 0.2059 | 0    | K.DLEEALEMGVDWSLR.E   |               |
| 167 - 181     | 1779.0052 | 1777.9979 | 1777.8192 | 0.1787 | 0    | K.DLEEALEMGVDWSLR.E   | Oxidation     |
| (M)           |           |           |           |        |      |                       |               |
| 182 - 198     | 2129.1034 | 2128.0961 | 2127.8592 | 0.2369 | 1    | R.EGYAWAEDKEHCEEYGR.M |               |
| 264 - 279     | 1655.9943 | 1654.9870 | 1654.8349 | 0.1521 | 0    | R.GLGHQVATDALVAMEK.A  |               |
| Oxidation (M) |           |           |           |        |      |                       |               |
| 309 - 321     | 1380.8225 | 1379.8152 | 1379.6404 | 0.1748 | 0    | K.GMAAAGNYAWVNR.S     |               |

309 - 321 1396.7981 1395.7909 1395.6353 0.1555 0 K.GMAAAGNYAWVNR.S Oxidation

(M)

No match to: 1336.3818, 2111.1168

488 Fumarate hydratase

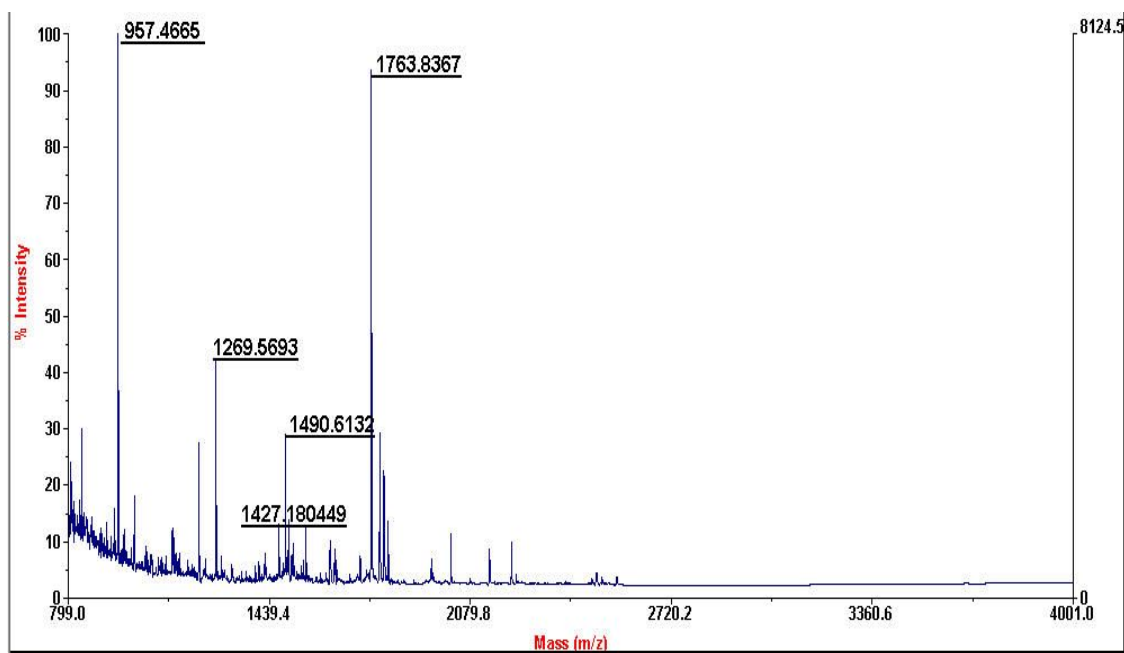

| Start - End | Observed  | Mr(expt)  | Mr(calc)  | Delta   | Miss Sequence            |
|-------------|-----------|-----------|-----------|---------|--------------------------|
| 52 - 61     | 1214.5462 | 1213.5389 | 1213.5867 | -0.0477 | 0 R.IEYDTFGELK.V         |
| 67 - 74     | 957.4665  | 956.4592  | 956.4716  | -0.0124 | 0 K.YYGAQTVR.S           |
| 102 - 115   | 1490.6132 | 1489.6059 | 1489.7049 | -0.0989 | 0 R.AAAEVNQDYGLDPK.I     |
| 173 - 183   | 1269.5693 | 1268.5620 | 1268.6626 | -0.1005 | 0 K.IPVHPNDHVNK.S        |
| 269 - 286   | 1763.8367 | 1762.8294 | 1762.9214 | -0.0919 | 0 R.IYELAAGGTAVGTGLNTR.I |

No match to: 1469.7050, 1804.8531, 1816.7826

489 Thioredoxin domain-containing protein 5

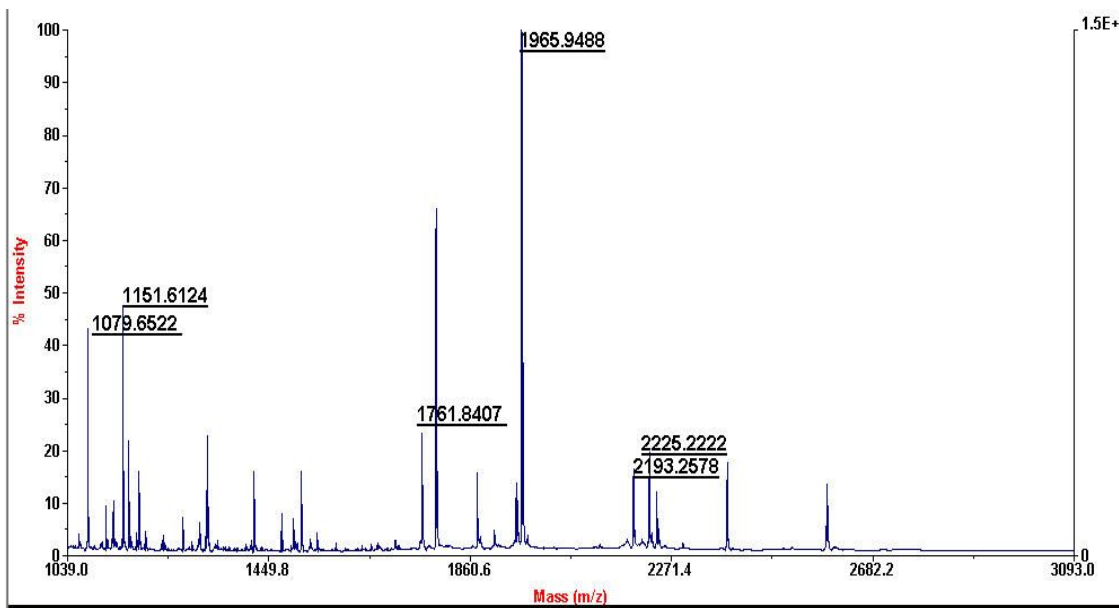

| Start - End | Observed  | Mr(expt)  | Mr(calc)  | Delta  | Miss Sequence              |
|-------------|-----------|-----------|-----------|--------|----------------------------|
| 95 - 113    | 2225.2222 | 2224.2149 | 2224.0106 | 0.2043 | 1 R.LQPTWNDLGDKYNSMEDAK.V  |
| 119 - 134   | 1761.8407 | 1760.8334 | 1760.7570 | 0.0764 | 0 K.VDCTAHSDVCSAQGVR.G 2   |
| 222 - 241   | 2193.2578 | 2192.2505 | 2192.1477 | 0.1028 | 0 K.ALAPTWEQLALGLEHSETVK.I |
| 245 - 260   | 1965.9488 | 1964.9415 | 1964.8469 | 0.0946 | 0 K.VDCTQHYELCSGNQVR.G 2   |
| 288 - 296   | 1151.6124 | 1150.6052 | 1150.5618 | 0.0433 | 0 R.EYVESQLQR.T            |
| 376 - 385   | 1163.5874 | 1162.5801 | 1162.5288 | 0.0513 | 0 K.IAEVDCTAER.N           |
| 395 - 403   | 1079.6522 | 1078.6449 | 1078.6175 | 0.0274 | 0 R.GYPTLLLFR.G            |

No match to: 1184.6773, 1323.5758, 1419.8079, 1790.9696, 1874.9409, 2384.0851, 2587.3215

490 NADH-ubiquinone oxidoreductase 75 kDa

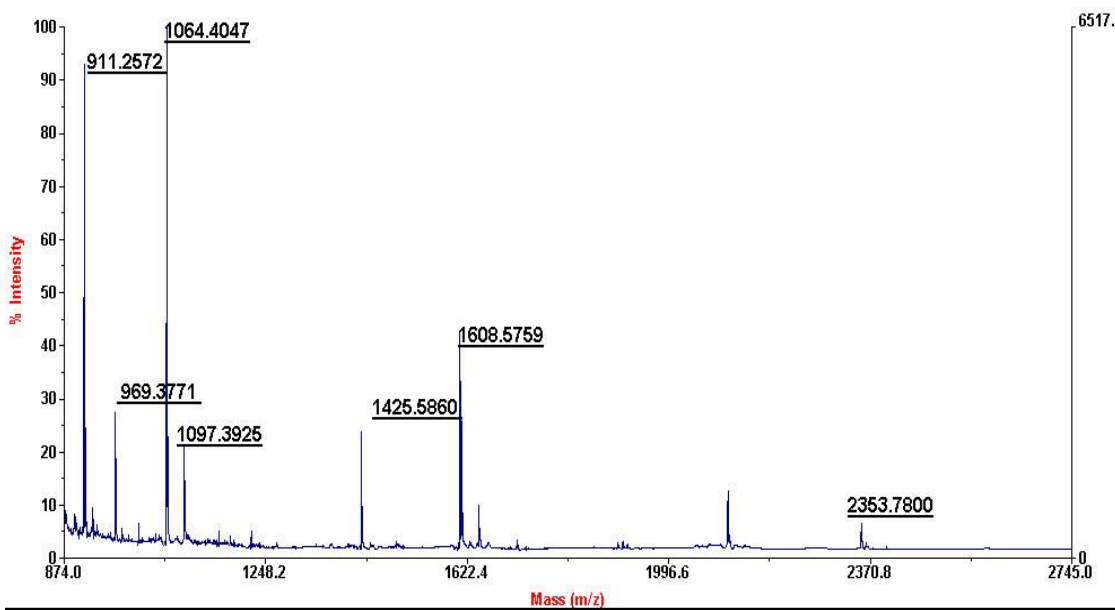

| Start - End | Observed  | Mr(expt)  | Mr(calc)  | Delta   | Miss Sequence                  |
|-------------|-----------|-----------|-----------|---------|--------------------------------|
| 63 - 68     | 911.2572  | 910.2499  | 910.3756  | -0.1256 | 0 R.FCYHER.L                   |
| 185 - 200   | 1608.5759 | 1607.5687 | 1607.7791 | -0.2105 | 0 R.FASEIAGVDDLGTGR.G          |
| 292 - 299   | 969.3771  | 968.3698  | 968.5080  | -0.1381 | 1 R.FAYDGLKR.Q                 |
| 361 - 382   | 2353.7800 | 2352.7727 | 2353.0744 | -0.3017 | 0 R.VSDTLCTEEVFPTAGAGTDLR.S    |
| 409 - 417   | 1064.4047 | 1063.3974 | 1063.5451 | -0.1477 | 0 R.FEAPLFNAR.I                |
| 502 - 511   | 1097.3925 | 1096.3852 | 1096.4859 | -0.1007 | 0 R.MTSGVTGDWK.V Oxidation (M) |
| 644 - 655   | 1425.5860 | 1424.5787 | 1424.7735 | -0.1948 | 1 R.NRLEEVSPLVLR.Y             |

No match to: 2105.6000

491 Lamin-B2

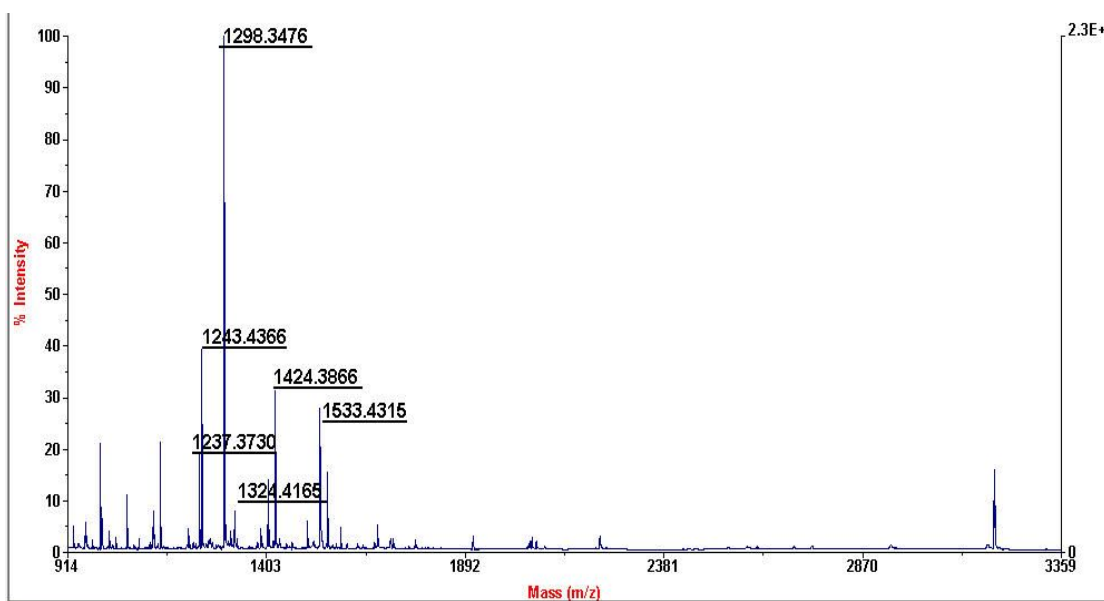

| Start - End | Observed | Mr(expt) | Mr(calc) | Delta | Miss Sequence |
|-------------|----------|----------|----------|-------|---------------|
|-------------|----------|----------|----------|-------|---------------|

|           |           |           |           |         |   |                               |
|-----------|-----------|-----------|-----------|---------|---|-------------------------------|
| 74 - 84   | 1237.3730 | 1236.3658 | 1236.5986 | -0.2328 | 0 | K.ALYESELADAR.R               |
| 129 - 138 | 1243.4366 | 1242.4293 | 1242.6721 | -0.2428 | 1 | R.VKDLESLFHR.S                |
| 192 - 202 | 1424.3866 | 1423.3793 | 1423.6402 | -0.2608 | 0 | R.CQSLQEELDFR.K               |
| 204 - 211 | 994.3283  | 993.3210  | 993.4767  | -0.1557 | 0 | K.SVFEEVVR.E                  |
| 362 - 372 | 1324.4165 | 1323.4092 | 1323.6492 | -0.2400 | 0 | K.LALDMEINAYR.K Oxidation (M) |
| 470 - 482 | 1533.4315 | 1532.4243 | 1532.6968 | -0.2725 | 1 | K.NNSDKDQSLGNWR.I             |
| 530 - 541 | 1298.3476 | 1297.3403 | 1297.5687 | -0.2284 | 0 | K.GQSSWGTGESFR.T              |

No match to: 1117.3881, 1675.5382, 3192.6775

492 Galectin-1

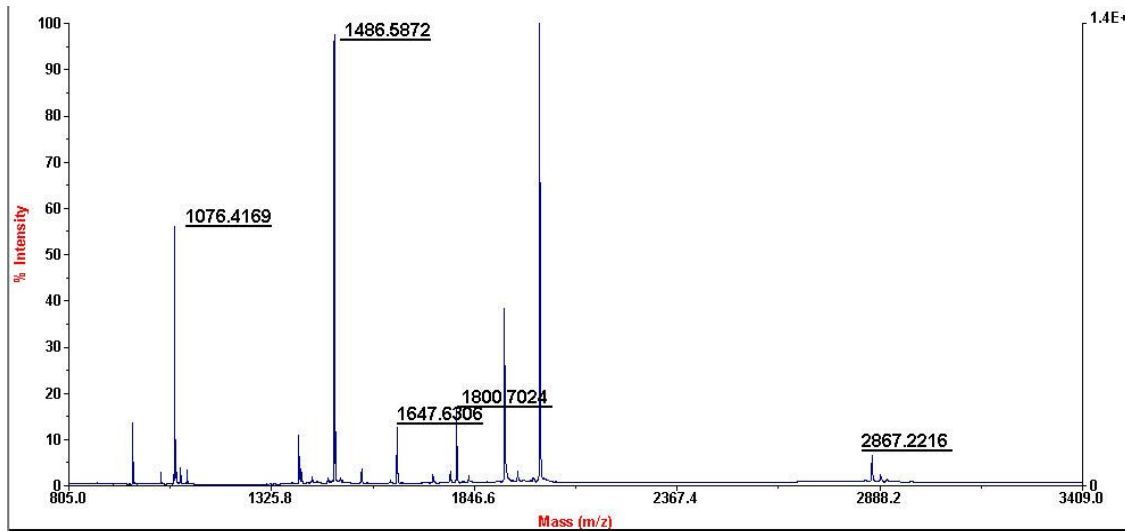

| Start - End                    | Observed  | Mr(expt)  | Mr(calc)  | Delta   | Miss Sequence                        |
|--------------------------------|-----------|-----------|-----------|---------|--------------------------------------|
| 38 - 49                        | 1486.5872 | 1485.5800 | 1485.6783 | -0.0983 | 0 K.DSNNLCLHFNPR.F                   |
| 50 - 64                        | 1647.6306 | 1646.6234 | 1646.7471 | -0.1237 | 0 R.FNAHGDANTIVCNSK.D                |
| 65 - 74                        | 1076.4169 | 1075.4096 | 1075.4683 | -0.0587 | 0 K.DGGAWGTEQR.E                     |
| 75 - 100                       | 2867.2216 | 2866.2144 | 2866.4212 | -0.2068 | 0                                    |
| R.EAVFPFQPGSVAEVCITFDQANLTVK.L |           |           |           |         |                                      |
| 113 - 128                      | 1800.7024 | 1799.6951 | 1799.8400 | -0.1449 | 0 R.LNLEAINYMAADGDFK.I Oxidation (M) |

No match to: 1395.6050, 1922.8754, 2013.9011

493 Chloride transport protein 6

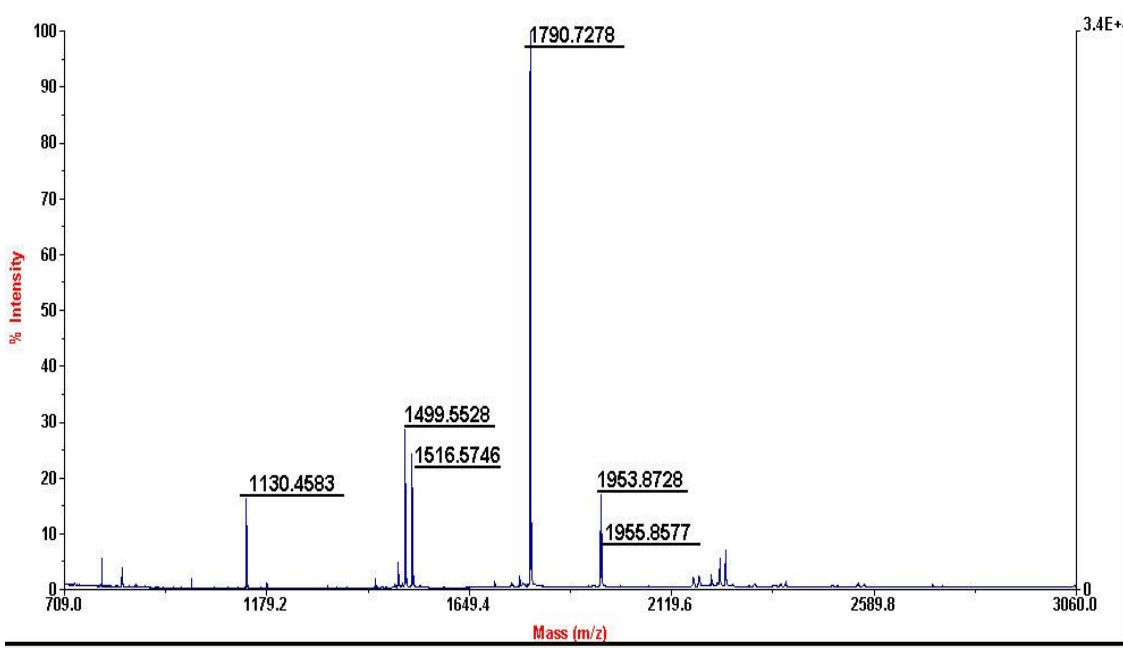

| Start - End | Observed  | Mr(expt)  | Mr(calc)  | Delta   | Miss Sequence                    |
|-------------|-----------|-----------|-----------|---------|----------------------------------|
| 2 - 13      | 1516.5746 | 1515.5674 | 1515.5622 | 0.0052  | 1 M.AGCRGSLCCCCR.W 5             |
| 6 - 21      | 1955.8577 | 1954.8504 | 1954.6316 | 0.2188  | 1 R.GSLCCCCRWCCCCGER.E 3         |
| 14 - 21     | 1130.4583 | 1129.4511 | 1129.3562 | 0.0949  | 0 R.WCCCCGER.E 3                 |
| 56 - 71     | 1953.8728 | 1952.8655 | 1952.8859 | -0.0204 | 0 R.CINDPYLEVLETMDNK.K           |
| 584 - 598   | 1790.7278 | 1789.7205 | 1789.8444 | -0.1239 | 0 R.GVPLLEWETEVEVMDK.L Oxidation |
| (M)         |           |           |           |         |                                  |
| 675 - 687   | 1499.5528 | 1498.5456 | 1498.7086 | -0.1630 | 1 R.SQSMKSYPSSELR.N              |

No match to: 1500.5726

494 Collagen alpha-2



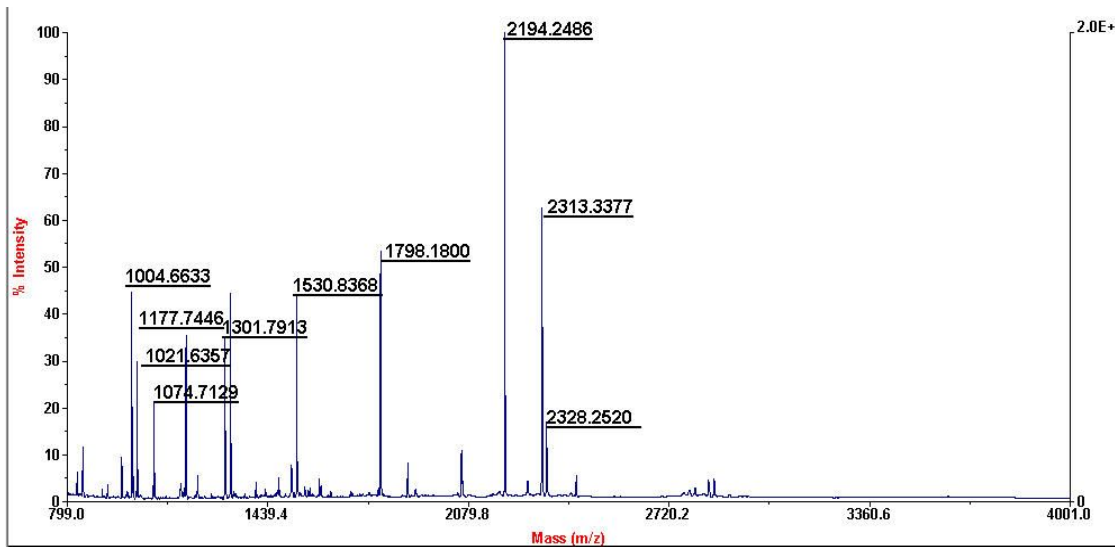

| Start - End | Observed  | Mr(expt)  | Mr(calc)  | Delta  | Miss Sequence              |
|-------------|-----------|-----------|-----------|--------|----------------------------|
| 96 - 115    | 2194.2486 | 2193.2413 | 2193.0127 | 0.2286 | 0 R.YGGLHFSDQVEVFSPGSDR.A  |
| 121 - 129   | 1021.6357 | 1020.6284 | 1020.5352 | 0.0932 | 0 K.NLQGISSFR.R            |
| 121 - 130   | 1177.7446 | 1176.7374 | 1176.6363 | 0.1010 | 1 K.NLQGISSFR.R.G          |
| 187 - 202   | 1798.1800 | 1797.1727 | 1796.9897 | 0.1830 | 1 R.LFAVAPNQLKEQGLR.D      |
| 203 - 213   | 1301.7913 | 1300.7841 | 1300.6411 | 0.1429 | 0 R.DIASTPHELYR.N          |
| 214 - 233   | 2328.2520 | 2327.2447 | 2327.0223 | 0.2224 | 0 R.NDYATMLPDSTEIDQDTINR.I |

Oxidation (M)

|             |           |           |           |        |                           |
|-------------|-----------|-----------|-----------|--------|---------------------------|
| 636 - 644   | 1074.7129 | 1073.7057 | 1073.5982 | 0.1075 | 0 K.NFVINVVNR.L           |
| 855 - 862   | 1004.6633 | 1003.6561 | 1003.5563 | 0.0998 | 1 R.FVEQVARR.L            |
| 994 - 1013  | 2313.3377 | 2312.3304 | 2312.0862 | 0.2442 | 1 R.AAVFHEKDYDSLAPGFFDR.F |
| 1001 - 1013 | 1530.8368 | 1529.8295 | 1529.6787 | 0.1508 | 0 K.DYDSLAPGFFDR.F        |

No match to: 1319.7812

495 Ras-related protein Rab-3D

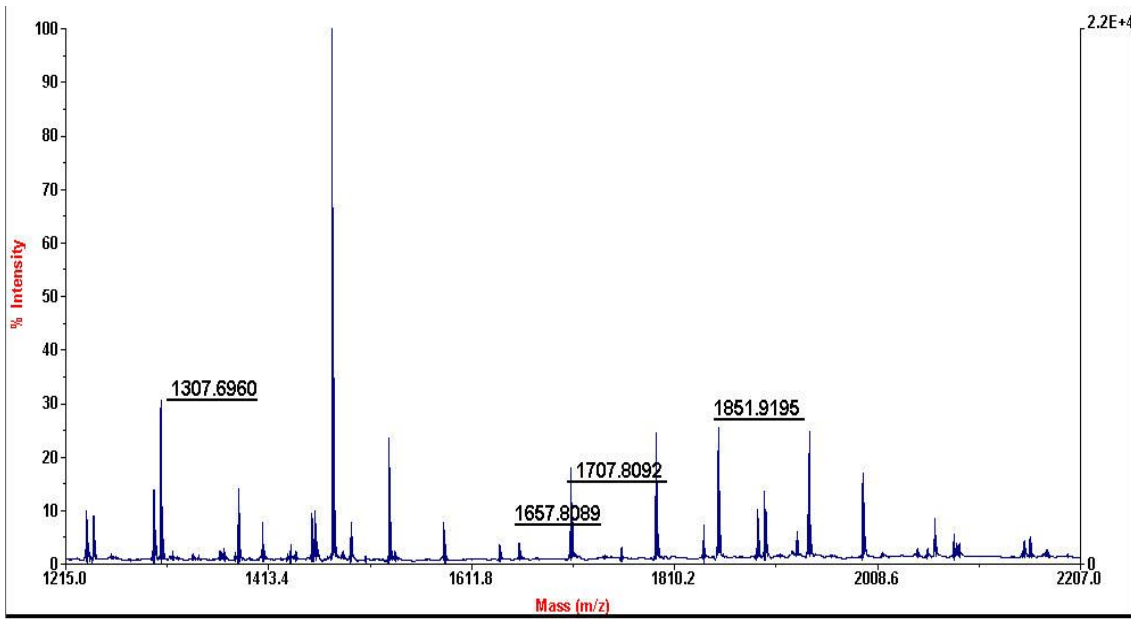

| Start - End | Observed  | Mr(expt)  | Mr(calc)  | Delta   | Miss Sequence             |
|-------------|-----------|-----------|-----------|---------|---------------------------|
| 25 - 41     | 1851.9195 | 1850.9122 | 1851.0618 | -0.1496 | 1 K.LLLIGNSSVGKTSFLFR.Y   |
| 84 - 93     | 1307.6960 | 1306.6887 | 1306.6670 | 0.0218  | 1 R.YRTITTAYR.G           |
| 122 - 136   | 1707.8092 | 1706.8020 | 1706.8628 | -0.0608 | 0 K.TYSWDNAQVILVGNK.C     |
| 203 - 219   | 1657.8089 | 1656.8016 | 1656.6872 | 0.1144  | 0 K.GPAVGDAPAPQPSSCSC.- 2 |

No match to: 1638.8456, 1791.7115, 1897.8929

496 26S protease regulatory subunit S10B

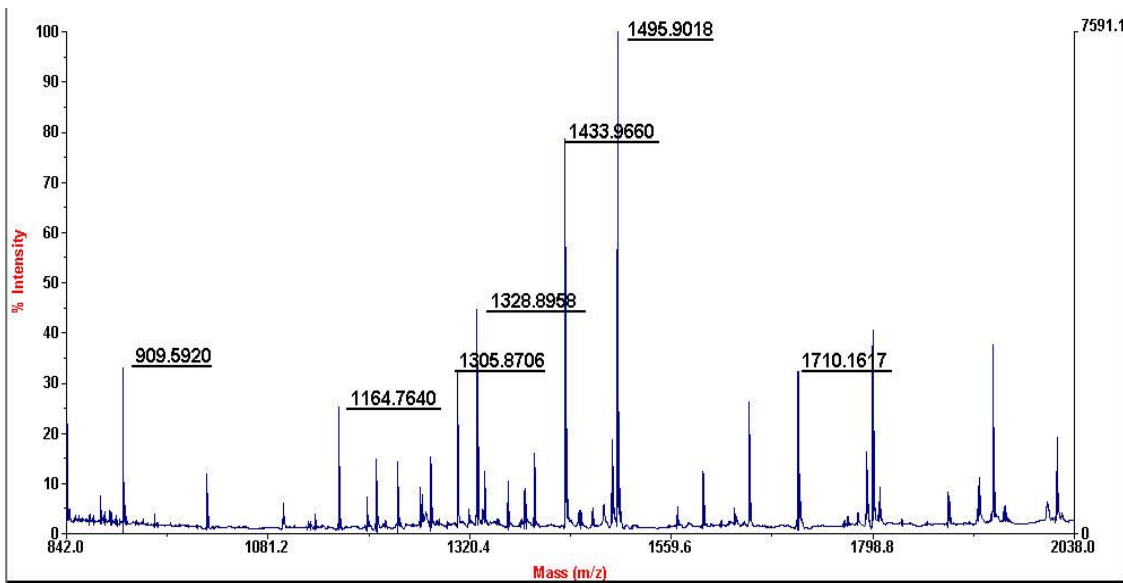

| Start - End | Observed | Mr(expt) | Mr(calc) | Delta | Miss Sequence |
|-------------|----------|----------|----------|-------|---------------|
|-------------|----------|----------|----------|-------|---------------|

|           |           |           |           |        |   |                              |
|-----------|-----------|-----------|-----------|--------|---|------------------------------|
| 79 - 85   | 909.5920  | 908.5847  | 908.4651  | 0.1197 | 1 | R.YVVGCR.R.Q                 |
| 198 - 213 | 1710.1617 | 1709.1544 | 1708.8996 | 0.2549 | 1 | K.VVSSIVDKYIGESAR.L          |
| 214 - 223 | 1328.8958 | 1327.8885 | 1327.6707 | 0.2179 | 1 | R.LIREMFNYAR.D Oxidation (M) |
| 243 - 255 | 1495.9018 | 1494.8946 | 1494.7063 | 0.1883 | 1 | R.FSEGTSADREIQR.T            |
| 298 - 309 | 1433.9660 | 1432.9587 | 1432.7786 | 0.1801 | 1 | R.KIHIDLPNEQAR.L             |
| 299 - 309 | 1305.8706 | 1304.8633 | 1304.6837 | 0.1796 | 0 | K.IHIDLPNEQAR.L              |
| 334 - 344 | 1164.7640 | 1163.7568 | 1163.5571 | 0.1997 | 0 | K.LSDGFNGADLR.N              |

No match to: 1489.0929, 1798.2945, 1941.2550, 2066.3008, 2196.5953

497 Aflatoxin B1 aldehyde reductase member 3

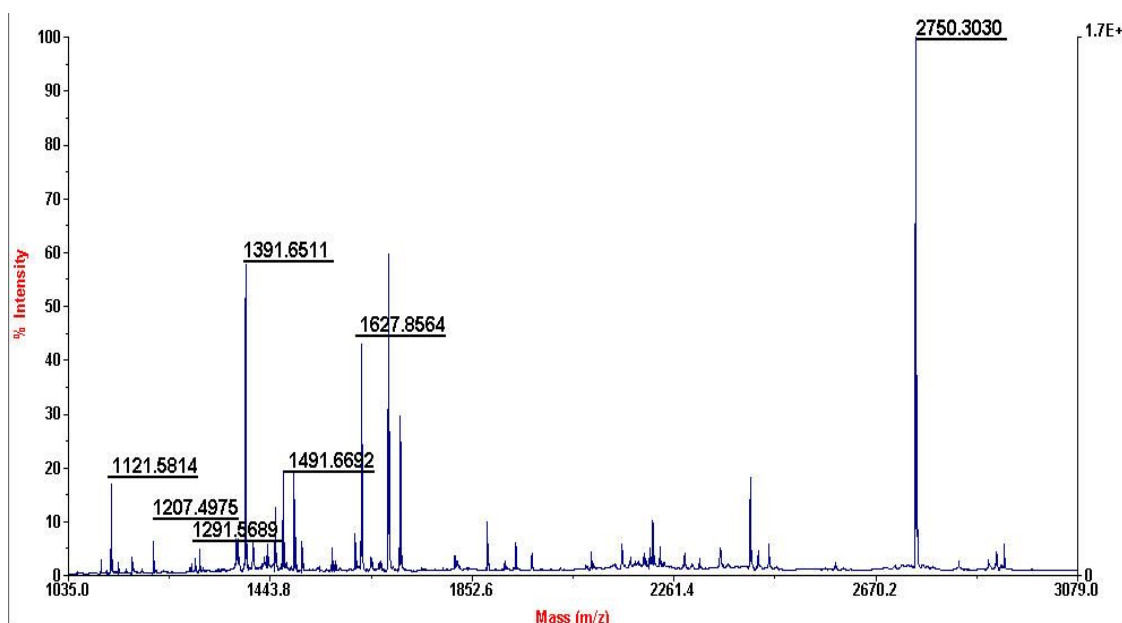

| Start - End | Observed  | Mr(expt)  | Mr(calc)  | Delta   | Miss Sequence                        |
|-------------|-----------|-----------|-----------|---------|--------------------------------------|
| 8 - 21      | 1491.6692 | 1490.6620 | 1490.7334 | -0.0714 | 0 R.ARPATVLGAMEMGR.R 2 Oxidation (M) |
| 22 - 33     | 1291.5689 | 1290.5616 | 1290.6350 | -0.0734 | 1 R.RMDAPTSAAVTR.A Oxidation (M)     |
| 39 - 64     | 2750.3030 | 2749.2958 | 2749.3559 | -0.0601 | 0 R.GHTEIDTAFVYSEGQSETILGGLGLR.L     |
| 78 - 92     | 1627.8564 | 1626.8491 | 1626.9093 | -0.0602 | 0 K.AIPLFGNSLKPDSLR.F                |
| 93 - 101    | 1121.5814 | 1120.5742 | 1120.6240 | -0.0499 | 1 R.FQLETSLKR.L                      |
| 101 - 106   | 829.4280  | 828.4207  | 828.4388  | -0.0181 | 1 K.RLQCPR.V                         |

127 - 136 1207.4975 1206.4902 1206.5564 -0.0661 0 R.ACHQLHQEGK.F  
 178 - 188 1391.6511 1390.6439 1390.6915 -0.0476 0 R.QVETELFPCLR.H

No match to: 892.4615, 944.5231, 1374.6338, 1507.6752, 1682.8009, 1706.8011

498 Ester hydrolase C11orf54

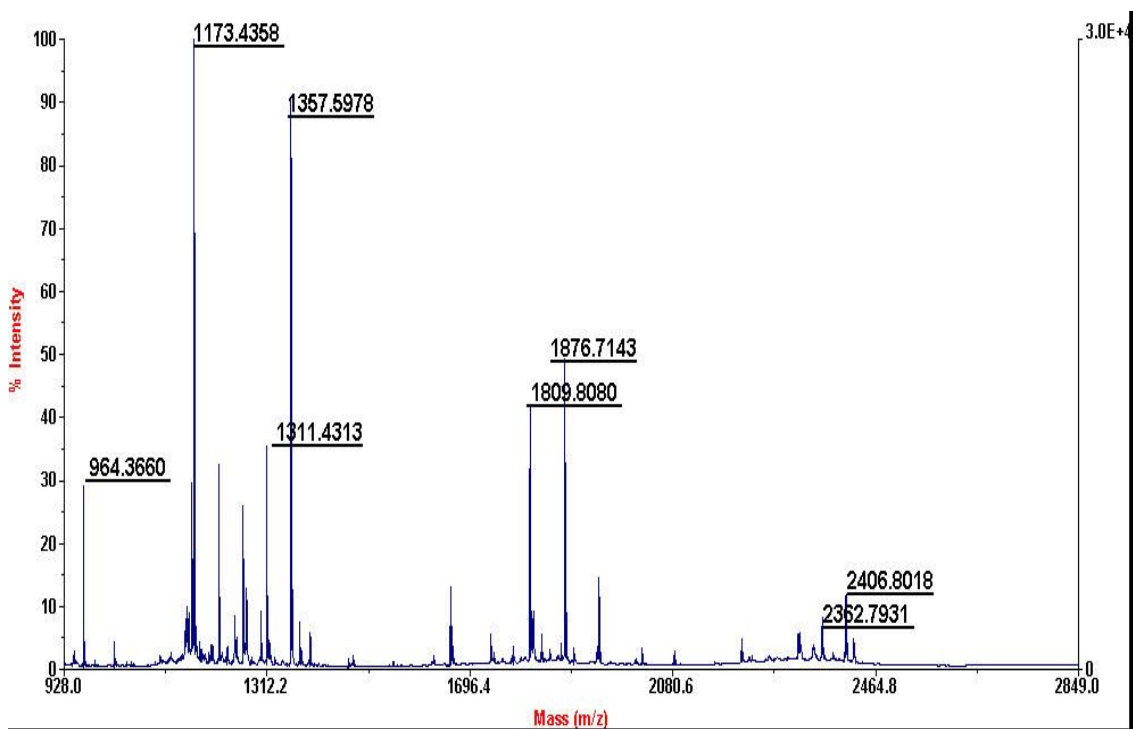

| Start - End   | Observed  | Mr(expt)  | Mr(calc)  | Delta   | Miss Sequence                     |
|---------------|-----------|-----------|-----------|---------|-----------------------------------|
| 44 - 51       | 964.3660  | 963.3587  | 963.5066  | -0.1478 | 0 K.EPFTFPVK.G                    |
| 59 - 75       | 1809.8080 | 1808.8007 | 1809.0400 | -0.2393 | 0 R.IAEVGGVPYLLPLVNQK.K           |
| 149 - 169     | 2362.7931 | 2361.7858 | 2362.0834 | -0.2976 | 0 K.CHDFQCALLANLFASEGQPGK.V 2     |
| 179 - 189     | 1311.4313 | 1310.4241 | 1310.6111 | -0.1871 | 0 R.TGPLNFVTCMR.E ; Oxidation (M) |
| 195 - 211     | 1876.7143 | 1875.7070 | 1875.9665 | -0.2595 | 0 K.HYGNKPIGMGGTFIIQK.G           |
| Oxidation (M) |           |           |           |         |                                   |
| 216 - 236     | 2406.8018 | 2405.7946 | 2406.0468 | -0.2522 | 0 K.SHIMPAEFSSCPLNSDEEVNK.W ;     |
| Oxidation (M) |           |           |           |         |                                   |
| 245 - 256     | 1357.5978 | 1356.5906 | 1356.7588 | -0.1682 | 0 K.APLVCLPVFVSR.D                |
| 257 - 263     | 819.2908  | 818.2835  | 818.3923  | -0.1088 | 0 R.DPGFDLR.L                     |
| 264 - 272     | 1173.4358 | 1172.4286 | 1172.5727 | -0.1441 | 0 R.LEHTHFFSR.H                   |

No match to: 1220.4209, 1266.5961, 1659.6312, 1939.7709, 2263.5245

499 UDP-glucose 4-epimerase

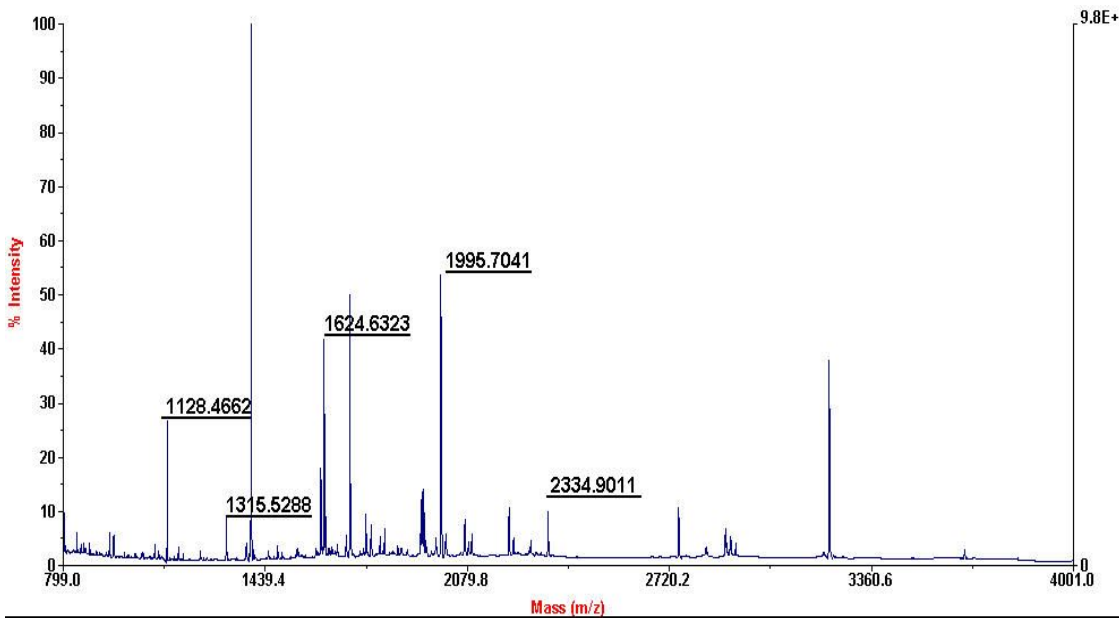

| Start - End   | Observed  | Mr(expt)  | Mr(calc)  | Delta   | Miss Sequence                  |
|---------------|-----------|-----------|-----------|---------|--------------------------------|
| 41 - 51       | 1128.4662 | 1127.4590 | 1127.6047 | -0.1458 | 1 R.GGSLPESLRR.V               |
| 59 - 75       | 1995.7041 | 1994.6968 | 1994.9255 | -0.2287 | 0 R.SVEFEEMDILDQGalQR.L        |
| Oxidation (M) |           |           |           |         |                                |
| 93 - 106      | 1624.6323 | 1623.6251 | 1623.8257 | -0.2006 | 0 K.AVGESVQKPLDYR.V            |
| 160 - 169     | 1315.5288 | 1314.5215 | 1314.6642 | -0.1427 | 1 K.SKFFIEEMIR.D Oxidation (M) |
| 266 - 286     | 2334.9011 | 2333.8939 | 2334.1236 | -0.2297 | 0 R.IYNLTGTGTGYSVLQMVQAMEK.A 2 |
| Oxidation (M) |           |           |           |         |                                |

No match to: 1393.5314, 1615.6615, 1706.6511, 1757.6643, 2010.1068, 2210.8630

500 Thiosulfate sulfurtransferase

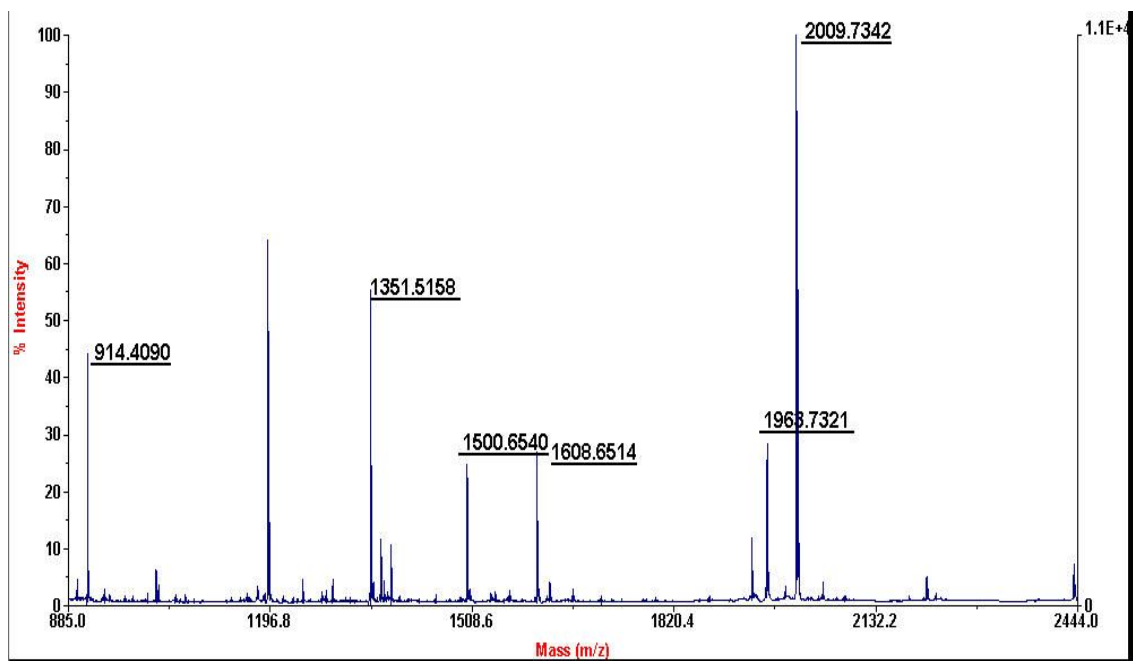

| Start - End | Observed  | Mr(expt)  | Mr(calc)  | Delta   | Miss Sequence             |
|-------------|-----------|-----------|-----------|---------|---------------------------|
| 2 - 8       | 914.4090  | 913.4017  | 913.5134  | -0.1117 | 0 M.VHQVLYR.A             |
| 31 - 42     | 1351.5158 | 1350.5085 | 1350.6568 | -0.1483 | 0 R.VLDASWYSPGTR.E        |
| 137 - 154   | 1968.7321 | 1962.7248 | 1962.9799 | -0.2551 | 0 K.EGHPVTSEPSRPEPAVFK.A  |
| 164 - 176   | 1608.6514 | 1607.6441 | 1607.8155 | -0.1714 | 1 K.TYEQVLENLESKR.F       |
| 177 - 183   | 864.3590  | 863.3517  | 863.4501  | -0.0984 | 0 R.FQLVDSR.S             |
| 188 - 206   | 2009.7342 | 2008.7269 | 2008.9854 | -0.2585 | 0 R.FLGTEPEPDAVGLDSGHIR.G |
| 238 - 250   | 1500.6540 | 1499.6467 | 1499.8130 | -0.1662 | 1 K.VDLSQPLIATCRK.G       |

No match to: 1193.4908, 1940.6342, 2210.8071, 2437.8706, 2760.8740

501 Pyruvate dehydrogenase E1 component subunit beta

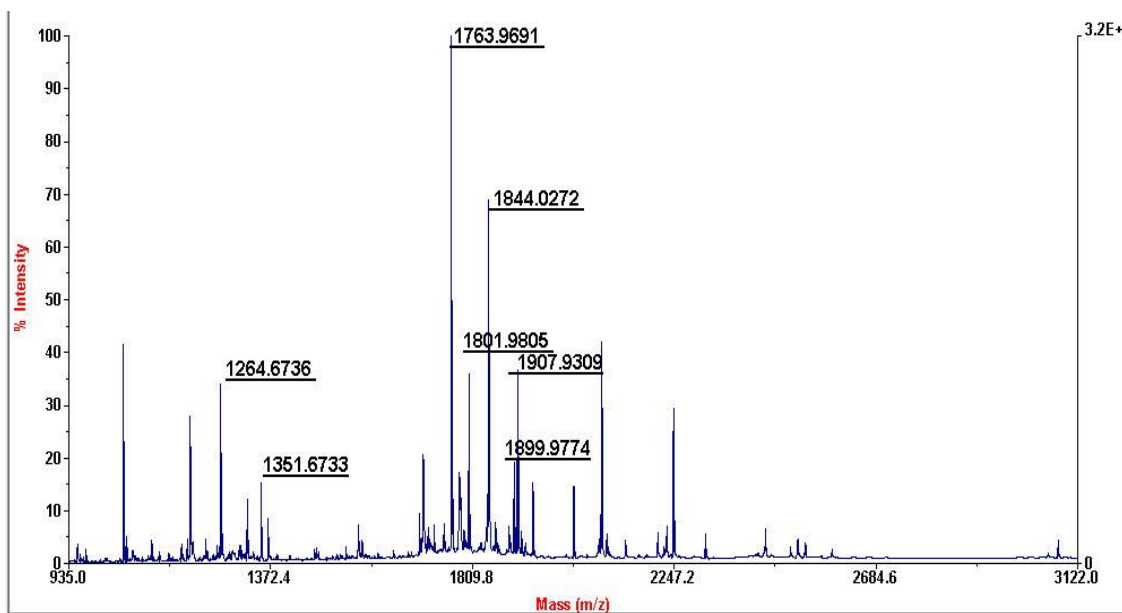

| Start - End   | Observed  | Mr(expt)  | Mr(calc)  | Delta  | Miss Sequence                     |
|---------------|-----------|-----------|-----------|--------|-----------------------------------|
| 37 - 52       | 1907.9309 | 1906.9236 | 1906.8214 | 0.1022 | 1 R.DAINQGMDEELERDEK.V            |
| Oxidation (M) |           |           |           |        |                                   |
| 53 - 68       | 1801.9805 | 1800.9733 | 1800.8934 | 0.0798 | 0 K.VLLGEEVAQYDGAYK.V             |
| 130 - 145     | 1844.0272 | 1843.0200 | 1842.9339 | 0.0861 | 0 K.TYYMSGGLQPPIVFR.G Oxidation   |
| (M)           |           |           |           |        |                                   |
| 259 - 269     | 1351.6733 | 1350.6660 | 1350.5908 | 0.0753 | 0 K.EGVECEVINMR.T ; Oxidation (M) |
| 270 - 285     | 1899.9774 | 1898.9702 | 1898.8788 | 0.0914 | 0 R.TIRPMDMETIEASVMK.T 3          |
| Oxidation (M) |           |           |           |        |                                   |
| 309 - 324     | 1763.9691 | 1762.9618 | 1762.8712 | 0.0906 | 0 R.IMEGPAFNFLDAPAVR.V Oxidation  |
| (M)           |           |           |           |        |                                   |
| 325 - 336     | 1264.6736 | 1263.6663 | 1263.6169 | 0.0494 | 0 R.VTGADVPMPLYAK.I Oxidation (M) |

No match to: 1053.6247, 1197.7769, 1779.9986, 2089.1646, 2101.2001, 2245.2190

502 Glycerol-3-phosphate dehydrogenase

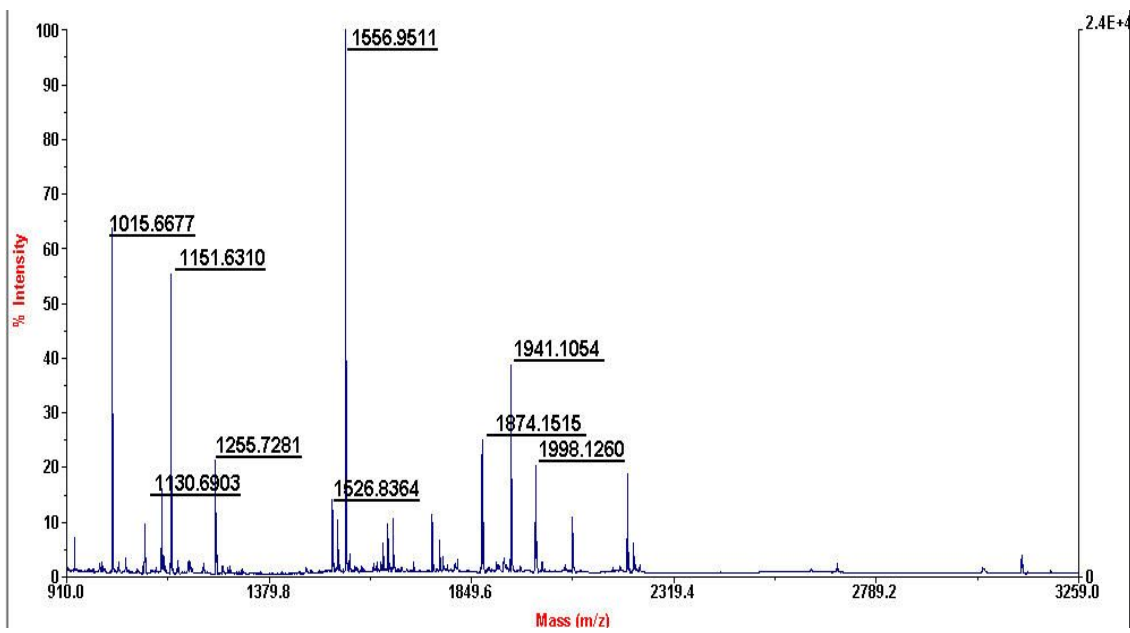

| Start - End | Observed  | Mr(expt)  | Mr(calc)  | Delta  | Miss Sequence                     |
|-------------|-----------|-----------|-----------|--------|-----------------------------------|
| 21 - 35     | 1556.9511 | 1555.9439 | 1555.8107 | 0.1332 | 0 K.IVGGNAAQLAQFDPR.V             |
| 36 - 48     | 1526.8364 | 1525.8292 | 1525.7123 | 0.1169 | 0 R.VTMWVFEEDIGGK.K Oxidation (M) |
| 131 - 139   | 1015.6677 | 1014.6605 | 1014.5709 | 0.0895 | 0 K.LISEVIGER.L                   |
| 179 - 187   | 1151.6310 | 1150.6238 | 1150.5441 | 0.0797 | 0 K.ELMQTPNFR.I Oxidation (M)     |
| 188 - 204   | 1874.1515 | 1873.1442 | 1872.9867 | 0.1575 | 0 R.ITVVQEVDTVEICGALK.N           |
| 205 - 224   | 1941.1054 | 1940.0981 | 1939.9099 | 0.1883 | 0 K.NVAVGAGFCDGLGFGDNTK.A         |
| 205 - 224   | 1998.1260 | 1997.1187 | 1996.9313 | 0.1874 | 0 K.NVAVGAGFCDGLGFGDNTK.A         |
| 230 - 240   | 1255.7281 | 1254.7209 | 1254.6352 | 0.0857 | 0 R.LGLMEMIAFAK.L 2 Oxidation (M) |
| 272 - 279   | 891.5854  | 890.5781  | 890.4974  | 0.0807 | 1 R.KVAEAFAR.T                    |
| 305 - 313   | 1130.6903 | 1129.6830 | 1129.6131 | 0.0699 | 0 R.ELYSILQHK.G                   |

No match to: 1091.1449, 2083.2092, 2211.3017

503 Hepatoma-derived growth factor



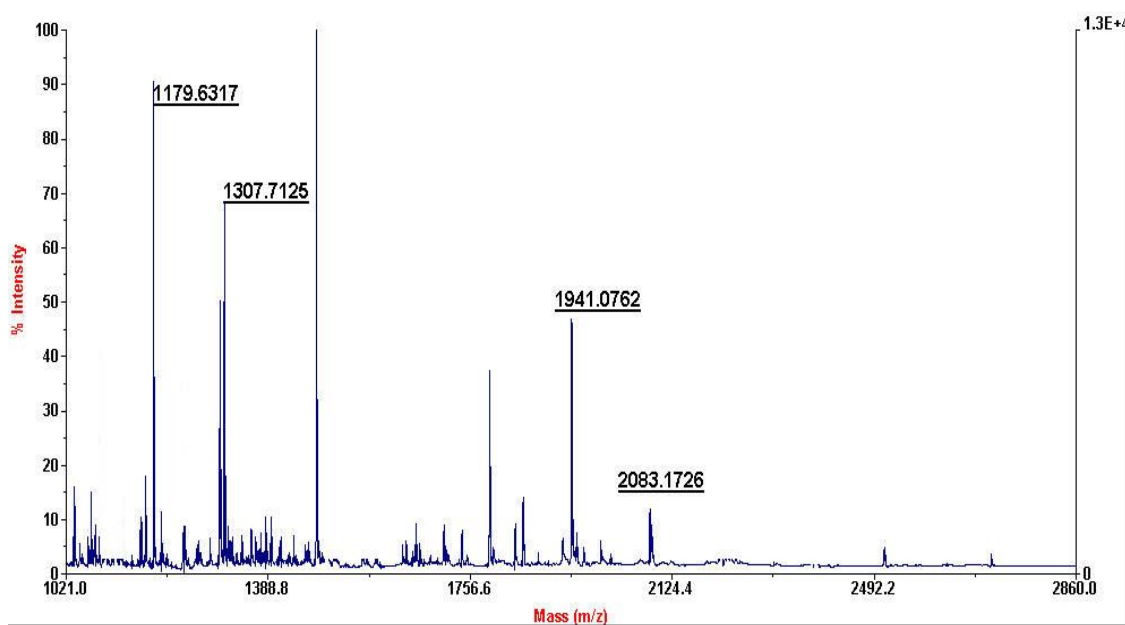

| Start - End   | Observed  | Mr(expt)  | Mr(calc)  | Delta  | Miss Sequence            |
|---------------|-----------|-----------|-----------|--------|--------------------------|
| 22 - 39       | 2083.1726 | 2082.1653 | 2081.9993 | 0.1660 | 1 K.GYPHWPARIDEMPEAAVK.S |
| Oxidation (M) |           |           |           |        |                          |
| 126 - 138     | 1307.7125 | 1306.7053 | 1306.5637 | 0.1416 | 1 K.KGNAEGSSDEEGK.L      |
| 127 - 138     | 1179.6317 | 1178.6245 | 1178.4687 | 0.1557 | 0 K.GNAEGSSDEEGK.L       |
| 181 - 197     | 1941.0762 | 1940.0690 | 1939.9924 | 0.0765 | 0 K.EAATLEVERPLMEVEK.N   |

No match to: 1300.6647, 1494.9468, 1852.1132

#### 504 F-actin-capping protein

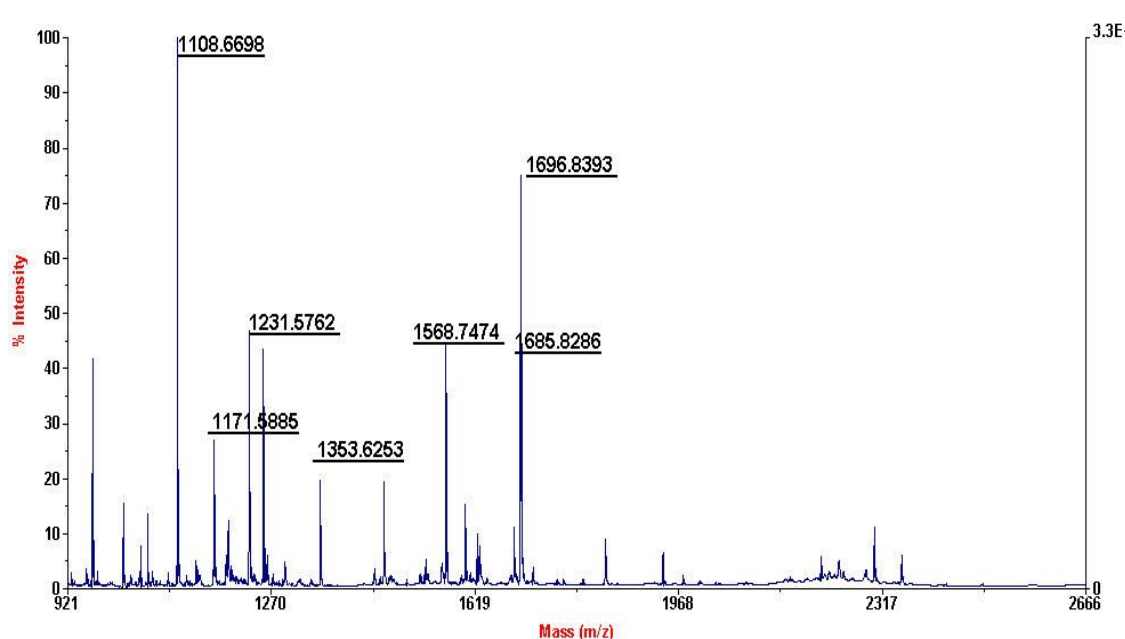

| Start - End | Observed  | Mr(expt)  | Mr(calc)  | Delta   | Miss Sequence                      |
|-------------|-----------|-----------|-----------|---------|------------------------------------|
| 15 - 23     | 1108.6698 | 1107.6625 | 1107.6400 | 0.0225  | 1 R.RLPPQIEK.N                     |
| 58 - 66     | 1231.5762 | 1230.5689 | 1230.5339 | 0.0350  | 0 K.DYLLCDYNR.D                    |
| 95 - 108    | 1696.8393 | 1695.8321 | 1695.8216 | 0.0104  | 1 R.KLEVEANNAFDQYR.D               |
| 96 - 108    | 1568.7474 | 1567.7401 | 1567.7267 | 0.0134  | 0 K.LEVEANNAFDQYR.D                |
| 146 - 159   | 1685.8286 | 1684.8213 | 1684.7879 | 0.0334  | 0 K.GCWDSIHVVEVQEK.S               |
| 182 - 195   | 1353.6253 | 1352.6180 | 1352.6354 | -0.0174 | 0 K.SGSGTMNLGGSLTR.Q Oxidation (M) |
| 226 - 235   | 1171.5885 | 1170.5812 | 1170.5921 | -0.0108 | 0 R.STLNEIYFGK.T                   |

No match to: 820.4588, 963.4790, 1057.6218, 1255.6214, 1462.6629, 1601.8342

### 505 Cathepsin D

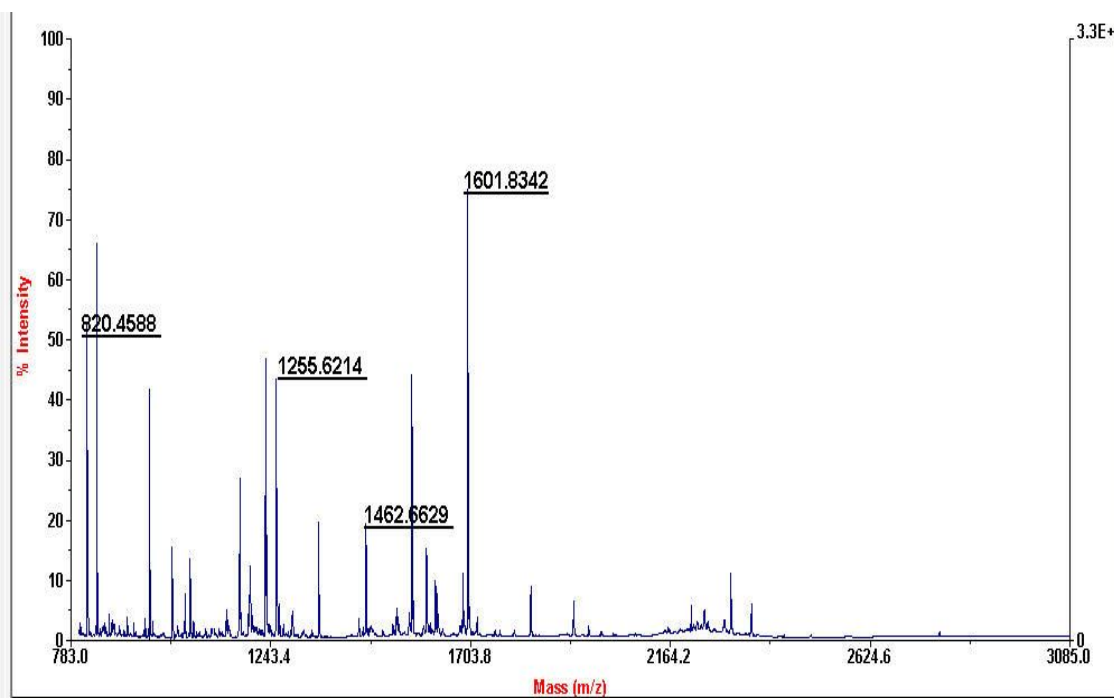

| Start - End | Observed  | Mr(expt)  | Mr(calc)  | Delta   | Miss Sequence                   |
|-------------|-----------|-----------|-----------|---------|---------------------------------|
| 195 - 205   | 1255.6214 | 1254.6141 | 1254.6067 | 0.0074  | 0 K.FDGILGMAYPR.I Oxidation (M) |
| 223 - 235   | 1601.8342 | 1600.8269 | 1600.8249 | 0.0020  | 0 K.LVDQNIFSFYLSR.D             |
| 393 - 399   | 963.4790  | 962.4717  | 962.4498  | 0.0219  | 0 R.YYTVFDR.D                   |
| 393 - 403   | 1462.6629 | 1461.6556 | 1461.6637 | -0.0081 | 1 R.YYTVFDRDNNR.V               |
| 404 - 411   | 820.4588  | 819.4515  | 819.4239  | 0.0277  | 0 R.VGFAEAAR.L                  |

No match to: 1171.5885, 1353.6253, 1568.7474, 1685.8286

506 Peflin

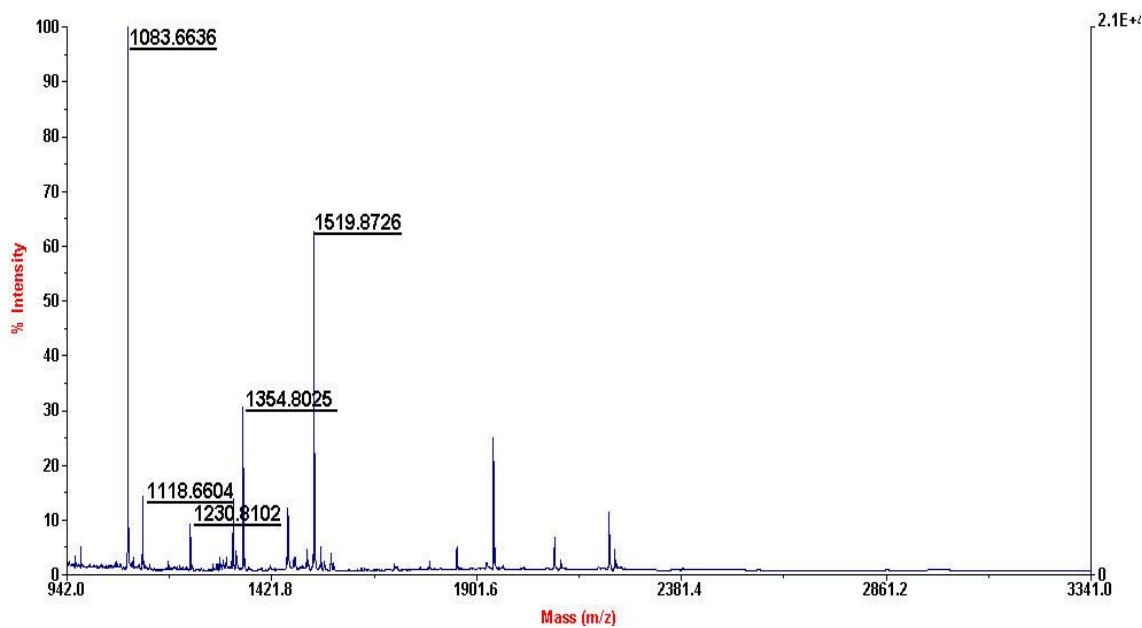

| Start - End | Observed  | Mr(expt)  | Mr(calc)  | Delta  | Miss Sequence                     |
|-------------|-----------|-----------|-----------|--------|-----------------------------------|
| 182 - 187   | 849.5609  | 848.5536  | 848.4545  | 0.0991 | 0 K.FIQQWK.N                      |
| 188 - 195   | 1083.6636 | 1082.6563 | 1082.5145 | 0.1418 | 0 K.NLFQQYDR.D                    |
| 188 - 197   | 1354.8025 | 1353.7952 | 1353.6425 | 0.1527 | 1 K.NLFQQYDRDR.S                  |
| 233 - 242   | 1118.6604 | 1117.6531 | 1117.5186 | 0.1346 | 0 R.SANPAMQLDR.F Oxidation (M)    |
| 259 - 269   | 1230.8102 | 1229.8030 | 1229.6364 | 0.1666 | 1 R.EKDTAVQGNIR.L                 |
| 270 - 282   | 1519.8726 | 1518.8653 | 1518.7025 | 0.1629 | 0 R.LSFEDFVTMTASR.M Oxidation (M) |

No match to: 1330.8182, 1459.1242, 1855.2211, 1941.1449, 2083.2198, 2211.3716

507 Myosin regulatory light polypeptide 9

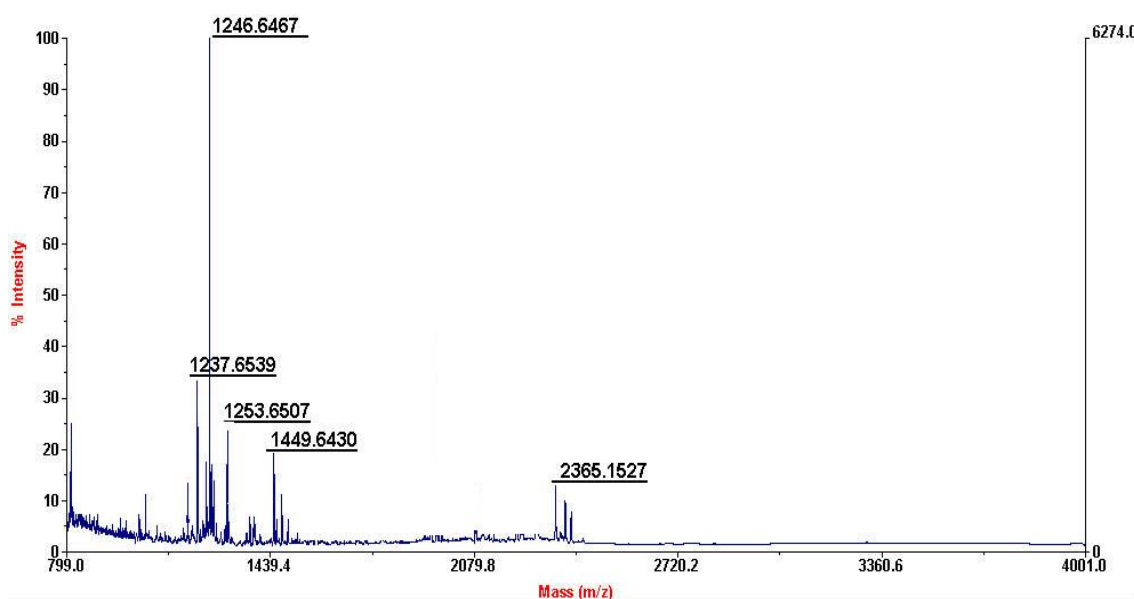

| Start - End | Observed  | Mr(expt)  | Mr(calc)  | Delta  | Miss Sequence                   |
|-------------|-----------|-----------|-----------|--------|---------------------------------|
| 36 - 45     | 1237.6539 | 1236.6467 | 1236.5557 | 0.0910 | 0 K.EAFNMIDQNR.D                |
| 36 - 45     | 1253.6507 | 1252.6434 | 1252.5506 | 0.0928 | 0 K.EAFNMIDQNR.D Oxidation (M)  |
| 105 - 124   | 2365.1527 | 2364.1454 | 2364.0229 | 0.1225 | 0 R.NAFACFDEEASGFIHEDHLR.E      |
| 134 - 144   | 1449.6430 | 1448.6357 | 1448.5766 | 0.0591 | 0 R.FTDEEVDEMYR.E Oxidation (M) |
| 152 - 161   | 1246.6467 | 1245.6395 | 1245.5778 | 0.0616 | 0 K.GNFFNYVEFTR.I               |

No match to: 1210.6176

### 508 Oral-facial-digital syndrome 1 protein

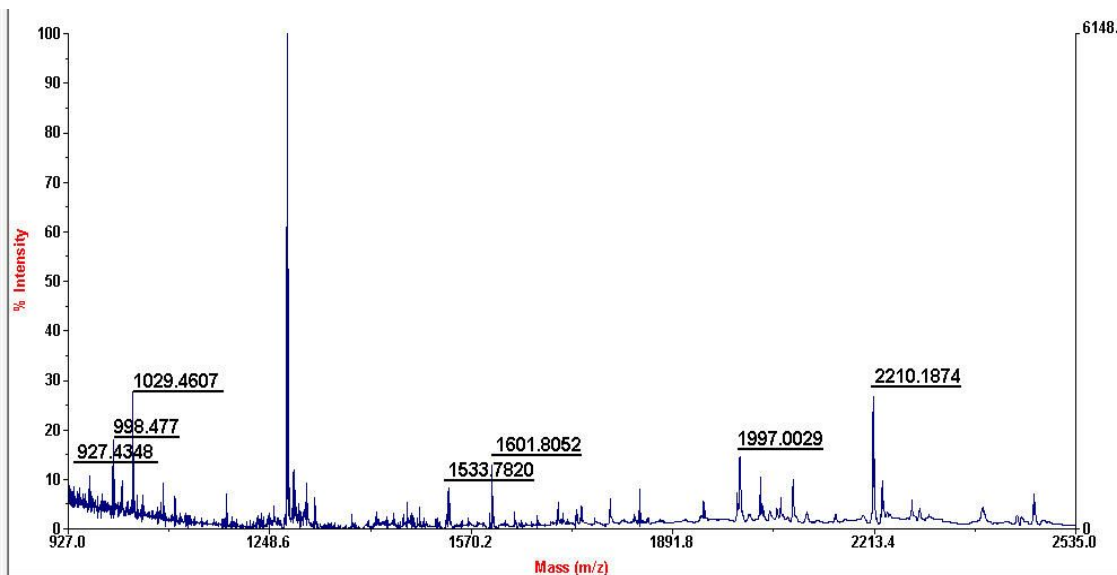

| Start - End                          | Observed  | Mr(expt)  | Mr(calc)  | Delta   | Miss Sequence         |
|--------------------------------------|-----------|-----------|-----------|---------|-----------------------|
| 22 - 28                              | 927.4348  | 926.4275  | 926.5225  | -0.0950 | 1 K.KLYQTFK.D         |
| 29 - 37                              | 1030.4679 | 1029.4607 | 1029.5818 | -0.1212 | 1 K.DRGILDTLK.T       |
| 42 - 60                              | 2211.1947 | 2210.1874 | 2210.1630 | 0.0244  | 0                     |
| R.NQLIHELMHPVLSGELQPR.S              |           |           |           |         |                       |
| 733 - 741                            | 998.4776  | 997.4703  | 997.5920  | -0.1217 | 1 R.RLSSTPLPK.A       |
| 780 - 794                            | 1602.8125 | 1601.8052 | 1601.8413 | -0.0361 | 0 R.HSLSIPPVSSPPEQK.V |
| 933 - 948                            | 1998.0102 | 1997.0029 | 1996.8605 | 0.1424  | 0                     |
| K.ELEMENELEMSNQEIK.D 2 Oxidation (M) |           |           |           |         |                       |
| 951 - 963                            | 1533.7820 | 1532.7747 | 1532.7293 | 0.0454  | 1 K.SAHSENPLEKYMK.I   |

No match to: 1275.6968, 1276.6791, 1286.6521

### 509 BTB/POZ domain-containing protein 10

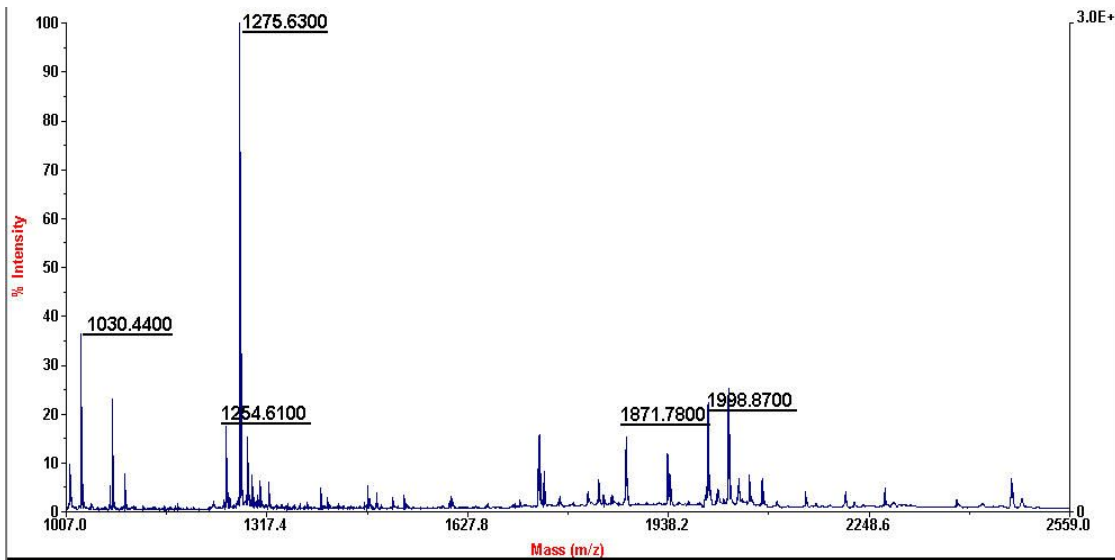

| Start - End   | Observed  | Mr(expt)  | Mr(calc)  | Delta   | Miss | Sequence                 |
|---------------|-----------|-----------|-----------|---------|------|--------------------------|
| 49 - 60       | 1254.6100 | 1253.6027 | 1253.5571 | 0.0456  | 0    | K. MSLHGASGGHER. S       |
| Oxidation (M) |           |           |           |         |      |                          |
| 145 - 161     | 1871.7800 | 1870.7727 | 1870.8883 | -0.1156 | 1    | K. TAGEMVFVYENAKEGAR. N  |
| 169 - 177     | 1030.4400 | 1029.4327 | 1029.5819 | -0.1491 | 0    | R. VTLIVDNTR. F          |
| 250 - 265     | 1998.8700 | 1997.8627 | 1997.8750 | -0.0123 | 0    | R. EACDYLCISFEYSTIK. C 2 |
| 412 - 421     | 1275.6300 | 1274.6227 | 1274.6190 | 0.0037  | 1    | K. SRHVDFQCVK. S         |

No match to: 1078.4300, 1286.6200, 1738.6700

### 510 Filamin-A

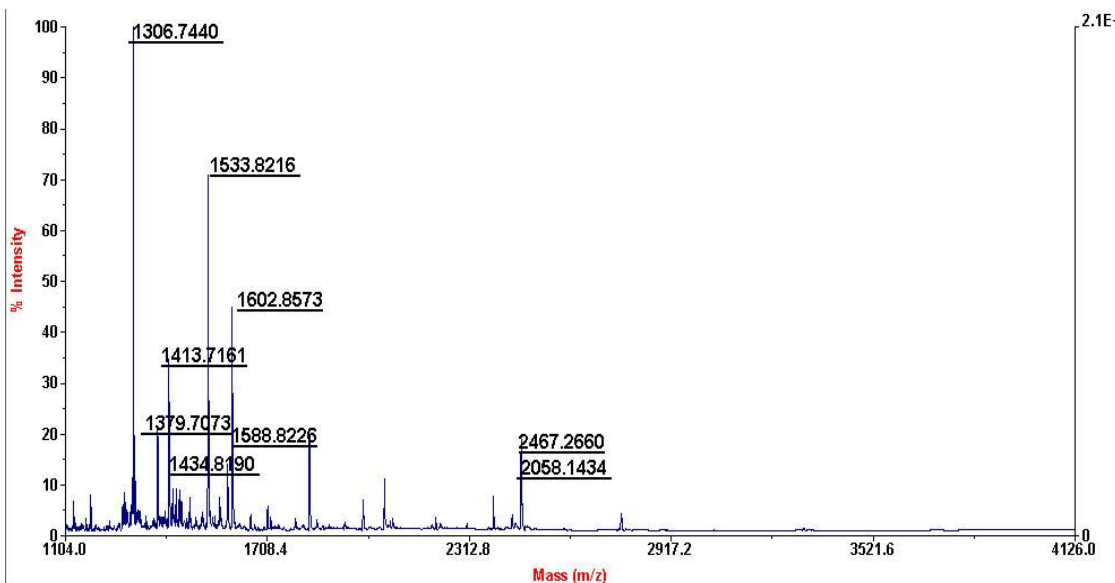

| Start - End                  | Observed  | Mr(expt)  | Mr(calc)  | Delta  | Miss | Sequence              |
|------------------------------|-----------|-----------|-----------|--------|------|-----------------------|
| 761 - 773                    | 1306.7440 | 1305.7368 | 1305.7153 | 0.0214 | 1    | R. VNVGAGSHPNKVK. V   |
| 959 - 973                    | 1533.8216 | 1532.8143 | 1532.8086 | 0.0057 | 0    | K. SPFSVAVSPSLDLSK. I |
| 1810 - 1824                  | 1602.8573 | 1601.8500 | 1601.8083 | 0.0417 | 1    | R. MPSGKVAQPTITDNK. D |
| Oxidation (M)                |           |           |           |        |      |                       |
| 1832 - 1845                  | 1588.8226 | 1587.8154 | 1587.7351 | 0.0803 | 0    | R. YAPSEAGLHEMDIR. Y  |
| 2311 - 2333                  | 2467.2660 | 2466.2587 | 2466.1816 | 0.0771 | 0    |                       |
| K. FNEEHIPDSPFVVPVSPSGDAR. R |           |           |           |        |      |                       |
| 2347 - 2367                  | 2058.1434 | 2057.1361 | 2057.0905 | 0.0456 | 1    |                       |
| K. VNQPASFAVSLNGAKGAIDAK. V  |           |           |           |        |      |                       |
| 2501 - 2513                  | 1379.7073 | 1378.7001 | 1378.6670 | 0.0331 | 0    | K. YGGPYHIGGSPFK. A   |
| 2585 - 2598                  | 1434.8190 | 1433.8118 | 1433.7561 | 0.0556 | 0    | K. AGNNMLLVGVHGPR. T  |
| 2632 - 2643                  | 1413.7161 | 1412.7088 | 1412.6473 | 0.0615 | 0    | K. WGDEHIPGSPYR. V    |

No match to: 1126.5514, 1529.7966, 1834.0086
